# Supplementary material for: Aging-regulated PNUTS maintains endothelial barrier function via SEMA3B suppression
Source: PubMed Central journal article supplement (PMC11076560; doi:10.1038/s42003-024-06230-5), 2024-05-07
Supplement: 42003_2024_6230_MOESM2_ESM.pdf [file 42003_2024_6230_MOESM2_ESM.pdf]

## Description of Additional Supplementary Files

**File name:** Supplementary Data 1

**Description:** The source data behind the graphs in the paper.

**File name:** Supplementary Data 2

**Description:** RNA sequencing lungs of PNUTS<sup>EC-KO</sup> mice vs lungs of PNUTS<sup>WT</sup> mice.

**File name:** Supplementary Data 3

**Description:** RNA sequencing siPNUTS (KD) vs siControl (Ctr) HUVECs.
