# Supplementary material for: Aging-regulated PNUTS maintains endothelial barrier function via SEMA3B suppression
Source: PubMed Central journal article supplement (PMC11076560; doi:10.1038/s42003-024-06230-5), 2024-05-07
Supplement: 42003_2024_6230_MOESM4_ESM.pdf [file 42003_2024_6230_MOESM4_ESM.pdf]

| ID                 | names         | Ratio KO/WT | Fold change KO/WT | log2ratio | P-value | R-factor  | Abs R    |
|--------------------|---------------|-------------|-------------------|-----------|---------|-----------|----------|
| ENSMUSG00000024653 | Scgb1a1       | 3.79E+11    | 3.79E+11          | 38.47     | 0.0048  | 5.46E+12  | 5.46E+12 |
| ENSMUSG00000064351 | mt-Co1        | 2.17E+10    | 2.17E+10          | 34.34     | 0.0064  | 2.72E+11  | 2.72E+11 |
| ENSMUSG00000102333 | Gm37235       | 7.91E-11    | -1.26E+10         | -33.56    | 0.0193  | -9.10E+10 | 9.10E+10 |
| ENSMUSG00000069833 | Ahnak         | 3.50E+09    | 3.50E+09          | 31.71     | 0.0055  | 4.73E+10  | 4.73E+10 |
| ENSMUSG00000064366 | mt-Tl2        | 2.42E+09    | 2.42E+09          | 31.17     | 0.0105  | 2.35E+10  | 2.35E+10 |
| ENSMUSG00000064823 | Snord82       | 4.06E-10    | -2.46E+09         | -31.20    | 0.0468  | -1.14E+10 | 1.14E+10 |
| ENSMUSG00000104794 | mmu-mir-28c   | 5.58E-10    | -1.79E+09         | -30.74    | 0.0287  | -1.06E+10 | 1.06E+10 |
| ENSMUSG00000088169 | Gm22059       | 3.52E-09    | -2.84E+08         | -28.08    | 0.0019  | -6.61E+09 | 6.61E+09 |
| ENSMUSG00000098827 | Gm27399       | 1.17E-09    | -8.54E+08         | -29.67    | 0.0201  | -6.02E+09 | 6.02E+09 |
| ENSMUSG00000088879 | Gm25867       | 5.67E+08    | 5.67E+08          | 29.08     | 0.0248  | 3.60E+09  | 3.60E+09 |
| ENSMUSG00000098539 | Mir133c       | 1.67E-09    | -5.99E+08         | -29.16    | 0.0428  | -2.90E+09 | 2.90E+09 |
| ENSMUSG00000077158 | Gm24578       | 3.43E+08    | 3.43E+08          | 28.36     | 0.0214  | 2.35E+09  | 2.35E+09 |
| ENSMUSG00000092906 | Gm25736       | 6.96E-09    | -1.44E+08         | -27.10    | 0.0057  | -1.91E+09 | 1.91E+09 |
| ENSMUSG00000080227 | Gm13343       | 8.28E-09    | -1.21E+08         | -26.85    | 0.0057  | -1.60E+09 | 1.60E+09 |
| ENSMUSG00000077602 | Gm22672       | 1.61E+08    | 1.61E+08          | 27.26     | 0.0109  | 1.54E+09  | 1.54E+09 |
| ENSMUSG00000088713 | Gm22729       | 4.86E-09    | -2.06E+08         | -27.62    | 0.0436  | -9.86E+08 | 9.86E+08 |
| ENSMUSG00000089188 | Gm22942       | 1.68E-08    | -5.94E+07         | -25.82    | 0.0057  | -7.89E+08 | 7.89E+08 |
| ENSMUSG00000077278 | Gm22778       | 1.92E-08    | -5.21E+07         | -25.64    | 0.0057  | -6.93E+08 | 6.93E+08 |
| ENSMUSG00000103930 | Gm36961       | 2.14E-08    | -4.67E+07         | -25.48    | 0.0048  | -6.73E+08 | 6.73E+08 |
| ENSMUSG00000082864 | Gm13358       | 1.65E+07    | 1.65E+07          | 23.97     | 0.0006  | 6.64E+08  | 6.64E+08 |
| ENSMUSG00000104001 | Gm38334       | 1.01E+07    | 1.01E+07          | 23.26     | 0.0005  | 4.36E+08  | 4.36E+08 |
| ENSMUSG00000095891 | Gm10717       | 6.26E-08    | -1.60E+07         | -23.93    | 0.0023  | -3.36E+08 | 3.36E+08 |
| ENSMUSG00000065371 | Gm22739       | 1.43E-08    | -7.01E+07         | -26.06    | 0.0444  | -3.33E+08 | 3.33E+08 |
| ENSMUSG00000089309 | Gm24838       | 1.56E-08    | -6.40E+07         | -25.93    | 0.0420  | -3.13E+08 | 3.13E+08 |
| ENSMUSG00000093616 | 1700055C04Rik | 2.66E+07    | 2.66E+07          | 24.67     | 0.0101  | 2.65E+08  | 2.65E+08 |
| ENSMUSG00000082670 | Gm14050       | 1.50E+07    | 1.50E+07          | 23.84     | 0.0092  | 1.57E+08  | 1.57E+08 |
| ENSMUSG00000097987 | Gm17786       | 1.21E+07    | 1.21E+07          | 23.52     | 0.0101  | 1.20E+08  | 1.20E+08 |
| ENSMUSG00000082741 | Gm9703        | 1.57E+07    | 1.57E+07          | 23.91     | 0.0202  | 1.11E+08  | 1.11E+08 |
| ENSMUSG00000055403 | 4933427D06Rik | 1.84E+07    | 1.84E+07          | 24.13     | 0.0283  | 1.09E+08  | 1.09E+08 |
| ENSMUSG00000100101 | Gm29591       | 2.00E+07    | 2.00E+07          | 24.25     | 0.0433  | 9.61E+07  | 9.61E+07 |
| ENSMUSG00000086732 | Gm6117        | 1.36E+07    | 1.36E+07          | 23.70     | 0.0247  | 8.68E+07  | 8.68E+07 |
| ENSMUSG00000102909 | Gm2453        | 1.29E+07    | 1.29E+07          | 23.63     | 0.0228  | 8.56E+07  | 8.56E+07 |
| ENSMUSG00000080820 | Gm13197       | 1.56E-07    | -6.40E+06         | -22.61    | 0.0057  | -8.51E+07 | 8.51E+07 |
| ENSMUSG00000098162 | Gm26976       | 1.60E+06    | 1.60E+06          | 20.61     | 0.0005  | 6.90E+07  | 6.90E+07 |
| ENSMUSG00000056716 | Gm5420        | 1.17E+07    | 1.17E+07          | 23.48     | 0.0311  | 6.62E+07  | 6.62E+07 |
| ENSMUSG00000101603 | Gm28730       | 1.88E-07    | -5.33E+06         | -22.35    | 0.0066  | -6.58E+07 | 6.58E+07 |
| ENSMUSG00000087148 | 1700030C14Rik | 9.01E+06    | 9.01E+06          | 23.10     | 0.0275  | 5.43E+07  | 5.43E+07 |
| ENSMUSG00000044286 | Olfr221       | 7.34E+06    | 7.34E+06          | 22.81     | 0.0193  | 5.28E+07  | 5.28E+07 |
| ENSMUSG00000040013 | Fkbp6         | 3.29E+06    | 3.29E+06          | 21.65     | 0.0045  | 4.92E+07  | 4.92E+07 |
| ENSMUSG00000105154 | RP23-413C3.1  | 5.89E+06    | 5.89E+06          | 22.49     | 0.0152  | 4.77E+07  | 4.77E+07 |
| ENSMUSG00000085074 | Gm11494       | 4.58E+06    | 4.58E+06          | 22.13     | 0.0101  | 4.57E+07  | 4.57E+07 |
| ENSMUSG00000107322 | RP23-201C9.3  | 6.39E+06    | 6.39E+06          | 22.61     | 0.0247  | 4.06E+07  | 4.06E+07 |
| ENSMUSG00000064281 | Rpl19-ps1     | 3.22E+06    | 3.22E+06          | 21.62     | 0.0079  | 3.63E+07  | 3.63E+07 |
| ENSMUSG00000050936 | Hist2h2bb     | 7.76E+06    | 7.76E+06          | 22.89     | 0.0477  | 3.55E+07  | 3.55E+07 |
| ENSMUSG00000053654 | Krt42         | 4.43E+06    | 4.43E+06          | 22.08     | 0.0159  | 3.51E+07  | 3.51E+07 |
| ENSMUSG00000042184 | 1700069L16Rik | 6.16E+06    | 6.16E+06          | 22.55     | 0.0366  | 3.22E+07  | 3.22E+07 |
| ENSMUSG00000101997 | Gm28722       | 5.25E+06    | 5.25E+06          | 22.32     | 0.0286  | 3.10E+07  | 3.10E+07 |
| ENSMUSG00000066723 | Vmn1r183      | 3.43E+06    | 3.43E+06          | 21.71     | 0.0127  | 3.04E+07  | 3.04E+07 |
| ENSMUSG00000025405 | Inhbc         | 3.91E+06    | 3.91E+06          | 21.90     | 0.0172  | 2.98E+07  | 2.98E+07 |
| ENSMUSG00000068117 | Mei1          | 5.39E+05    | 5.39E+05          | 19.04     | 0.0004  | 2.78E+07  | 2.78E+07 |
| ENSMUSG00000085017 | Gm13412       | 5.67E+06    | 5.67E+06          | 22.43     | 0.0439  | 2.71E+07  | 2.71E+07 |
| ENSMUSG00000051952 | Olfr371       | 2.16E+06    | 2.16E+06          | 21.04     | 0.0069  | 2.61E+07  | 2.61E+07 |
| ENSMUSG00000100837 | 1700063D05Rik | 3.92E+06    | 3.92E+06          | 21.90     | 0.0237  | 2.55E+07  | 2.55E+07 |
| ENSMUSG00000081524 | Gm11658       | 2.05E+06    | 2.05E+06          | 20.97     | 0.0070  | 2.46E+07  | 2.46E+07 |
| ENSMUSG00000085949 | Gm14275       | 3.66E-07    | -2.73E+06         | -21.38    | 0.0129  | -2.41E+07 | 2.41E+07 |
| ENSMUSG00000105602 | RP24-364E17.1 | 5.07E+05    | 5.07E+05          | 18.95     | 0.0005  | 2.19E+07  | 2.19E+07 |
| ENSMUSG00000087559 | Gm13802       | 2.25E+06    | 2.25E+06          | 21.10     | 0.0105  | 2.19E+07  | 2.19E+07 |
| ENSMUSG00000044084 | 4933402P03Rik | 4.31E+06    | 4.31E+06          | 22.04     | 0.0420  | 2.10E+07  | 2.10E+07 |
| ENSMUSG00000092565 | Gm20477       | 2.35E-07    | -4.25E+06         | -22.02    | 0.0420  | -2.07E+07 | 2.07E+07 |
| ENSMUSG00000071147 | Tas2r140      | 3.17E+06    | 3.17E+06          | 21.59     | 0.0248  | 2.01E+07  | 2.01E+07 |
| ENSMUSG00000086001 | Gm13448       | 3.54E+06    | 3.54E+06          | 21.75     | 0.0332  | 1.94E+07  | 1.94E+07 |
| ENSMUSG00000082924 | Gm11462       | 3.87E+06    | 3.87E+06          | 21.88     | 0.0404  | 1.92E+07  | 1.92E+07 |
| ENSMUSG00000082093 | Gm15928       | 2.52E-07    | -3.97E+06         | -21.92    | 0.0428  | -1.92E+07 | 1.92E+07 |
| ENSMUSG00000099718 | Gm2087        | 3.75E-07    | -2.66E+06         | -21.35    | 0.0201  | -1.88E+07 | 1.88E+07 |
| ENSMUSG00000102688 | Gm37218       | 1.85E+06    | 1.85E+06          | 20.82     | 0.0105  | 1.80E+07  | 1.80E+07 |
| ENSMUSG00000082967 | Gm16082       | 4.00E-07    | -2.50E+06         | -21.25    | 0.0201  | -1.76E+07 | 1.76E+07 |

|                    |               |          |           |        |        |           |          |
|--------------------|---------------|----------|-----------|--------|--------|-----------|----------|
| ENSMUSG00000037390 | Muc3          | 1.65E+06 | 1.65E+06  | 20.65  | 0.0088 | 1.76E+07  | 1.76E+07 |
| ENSMUSG00000105650 | RP23-123110.3 | 6.41E-07 | -1.56E+06 | -20.57 | 0.0085 | -1.69E+07 | 1.69E+07 |
| ENSMUSG00000013928 | Thap8         | 3.38E+06 | 3.38E+06  | 21.69  | 0.0467 | 1.56E+07  | 1.56E+07 |
| ENSMUSG00000061877 | BC048679      | 2.60E+06 | 2.60E+06  | 21.31  | 0.0294 | 1.52E+07  | 1.52E+07 |
| ENSMUSG00000104397 | Gm37958       | 1.93E+06 | 1.93E+06  | 20.88  | 0.0168 | 1.49E+07  | 1.49E+07 |
| ENSMUSG00000082943 | Gm13355       | 3.29E-07 | -3.04E+06 | -21.53 | 0.0420 | -1.48E+07 | 1.48E+07 |
| ENSMUSG00000050933 | Vmn1r231      | 2.05E+06 | 2.05E+06  | 20.96  | 0.0198 | 1.45E+07  | 1.45E+07 |
| ENSMUSG00000078586 | Gm11735       | 2.67E+06 | 2.67E+06  | 21.35  | 0.0350 | 1.43E+07  | 1.43E+07 |
| ENSMUSG00000071303 | Rps8-ps1      | 9.41E-07 | -1.06E+06 | -20.02 | 0.0057 | -1.41E+07 | 1.41E+07 |
| ENSMUSG00000075524 | 4930407110Rik | 2.26E+06 | 2.26E+06  | 21.11  | 0.0262 | 1.39E+07  | 1.39E+07 |
| ENSMUSG00000102295 | Ighv1-57      | 4.16E-07 | -2.40E+06 | -21.20 | 0.0428 | -1.16E+07 | 1.16E+07 |
| ENSMUSG00000103007 | Gm20690       | 4.33E-07 | -2.31E+06 | -21.14 | 0.0420 | -1.13E+07 | 1.13E+07 |
| ENSMUSG00000086649 | Gm15286       | 2.00E+06 | 2.00E+06  | 20.93  | 0.0333 | 1.09E+07  | 1.09E+07 |
| ENSMUSG00000035946 | Gsx2          | 2.28E+06 | 2.28E+06  | 21.12  | 0.0476 | 1.05E+07  | 1.05E+07 |
| ENSMUSG00000091707 | Gm8224        | 6.77E-07 | -1.48E+06 | -20.49 | 0.0201 | -1.04E+07 | 1.04E+07 |
| ENSMUSG00000072707 | Olfir31       | 2.27E+06 | 2.27E+06  | 21.11  | 0.0492 | 1.02E+07  | 1.02E+07 |
| ENSMUSG00000097384 | Gm26815       | 1.64E+06 | 1.64E+06  | 20.64  | 0.0274 | 9.89E+06  | 9.89E+06 |
| ENSMUSG00000097981 | Gm7583        | 2.12E+06 | 2.12E+06  | 21.02  | 0.0492 | 9.58E+06  | 9.58E+06 |
| ENSMUSG00000019146 | Cacng2        | 1.72E+06 | 1.72E+06  | 20.72  | 0.0377 | 8.87E+06  | 8.87E+06 |
| ENSMUSG00000095030 | Olfir1513     | 1.23E+06 | 1.23E+06  | 20.23  | 0.0214 | 8.43E+06  | 8.43E+06 |
| ENSMUSG00000080948 | Gm14481       | 1.59E-06 | -6.30E+05 | -19.26 | 0.0057 | -8.37E+06 | 8.37E+06 |
| ENSMUSG00000102858 | Gm37086       | 1.35E+06 | 1.35E+06  | 20.37  | 0.0263 | 8.36E+06  | 8.36E+06 |
| ENSMUSG00000104098 | AA619741      | 1.65E-06 | -6.06E+05 | -19.21 | 0.0057 | -8.04E+06 | 8.04E+06 |
| ENSMUSG00000102372 | A430050A11Rik | 6.31E-07 | -1.59E+06 | -20.60 | 0.0428 | -7.66E+06 | 7.66E+06 |
| ENSMUSG00000045019 | Acer1         | 1.09E+06 | 1.09E+06  | 20.05  | 0.0223 | 7.26E+06  | 7.26E+06 |
| ENSMUSG00000098159 | Gm21614       | 1.02E-06 | -9.77E+05 | -19.90 | 0.0189 | -7.11E+06 | 7.11E+06 |
| ENSMUSG00000029663 | Gngt1         | 1.50E+06 | 1.50E+06  | 20.52  | 0.0447 | 7.09E+06  | 7.09E+06 |
| ENSMUSG00000042774 | Olfir1353     | 1.21E+06 | 1.21E+06  | 20.21  | 0.0313 | 6.84E+06  | 6.84E+06 |
| ENSMUSG00000021961 | 4930578106Rik | 1.42E+06 | 1.42E+06  | 20.44  | 0.0431 | 6.83E+06  | 6.83E+06 |
| ENSMUSG00000085931 | Gm12648       | 1.04E-06 | -9.57E+05 | -19.87 | 0.0201 | -6.75E+06 | 6.75E+06 |
| ENSMUSG00000103631 | Gm38060       | 7.43E-07 | -1.35E+06 | -20.36 | 0.0420 | -6.57E+06 | 6.57E+06 |
| ENSMUSG00000050763 | Olfir1395     | 1.36E+06 | 1.36E+06  | 20.38  | 0.0433 | 6.55E+06  | 6.55E+06 |
| ENSMUSG00000097265 | Gm26803       | 8.41E+05 | 8.41E+05  | 19.68  | 0.0198 | 5.97E+06  | 5.97E+06 |
| ENSMUSG00000022061 | Nkx3-1        | 6.02E+05 | 6.02E+05  | 19.20  | 0.0118 | 5.56E+06  | 5.56E+06 |
| ENSMUSG00000041670 | Rims1         | 2.71E-06 | -3.70E+05 | -18.50 | 0.0047 | -5.42E+06 | 5.42E+06 |
| ENSMUSG00000105206 | RP23-158A20.2 | 1.12E+06 | 1.12E+06  | 20.10  | 0.0431 | 5.41E+06  | 5.41E+06 |
| ENSMUSG00000021907 | Msemb         | 9.52E-07 | -1.05E+06 | -20.00 | 0.0420 | -5.13E+06 | 5.13E+06 |
| ENSMUSG00000075072 | Olfir48       | 2.62E-06 | -3.81E+05 | -18.54 | 0.0057 | -5.06E+06 | 5.06E+06 |
| ENSMUSG00000097102 | 2310069G16Rik | 1.47E-06 | -6.79E+05 | -19.37 | 0.0201 | -4.79E+06 | 4.79E+06 |
| ENSMUSG00000078300 | Gm2606        | 2.98E-06 | -3.35E+05 | -18.36 | 0.0057 | -4.46E+06 | 4.46E+06 |
| ENSMUSG00000061561 | Olfir373      | 8.87E+05 | 8.87E+05  | 19.76  | 0.0461 | 4.13E+06  | 4.13E+06 |
| ENSMUSG00000102404 | 5530400K19Rik | 7.04E+05 | 7.04E+05  | 19.43  | 0.0298 | 4.08E+06  | 4.08E+06 |
| ENSMUSG00000040138 | Ndp           | 1.62E-06 | -6.17E+05 | -19.24 | 0.0229 | -4.07E+06 | 4.07E+06 |
| ENSMUSG00000082039 | Gm15653       | 8.05E+05 | 8.05E+05  | 19.62  | 0.0427 | 3.89E+06  | 3.89E+06 |
| ENSMUSG00000104417 | Gm37068       | 1.24E-06 | -8.03E+05 | -19.62 | 0.0428 | -3.88E+06 | 3.88E+06 |
| ENSMUSG00000085540 | Gm16036       | 1.30E-06 | -7.71E+05 | -19.56 | 0.0428 | -3.73E+06 | 3.73E+06 |
| ENSMUSG00000087668 | Gm11186       | 3.64E-06 | -2.74E+05 | -18.07 | 0.0057 | -3.65E+06 | 3.65E+06 |
| ENSMUSG00000040420 | Cdh18         | 4.81E-06 | -2.08E+05 | -17.66 | 0.0033 | -3.62E+06 | 3.62E+06 |
| ENSMUSG00000106419 | RP23-287M3.1  | 2.02E-06 | -4.96E+05 | -18.92 | 0.0201 | -3.50E+06 | 3.50E+06 |
| ENSMUSG00000081749 | Gm12241       | 1.49E-06 | -6.70E+05 | -19.35 | 0.0420 | -3.27E+06 | 3.27E+06 |
| ENSMUSG00000085924 | Gm8980        | 5.48E+05 | 5.48E+05  | 19.06  | 0.0288 | 3.23E+06  | 3.23E+06 |
| ENSMUSG00000097237 | Gm26519       | 6.94E+05 | 6.94E+05  | 19.40  | 0.0479 | 3.17E+06  | 3.17E+06 |
| ENSMUSG00000105248 | RP23-29F15.2  | 4.88E-06 | -2.05E+05 | -17.64 | 0.0057 | -2.72E+06 | 2.72E+06 |
| ENSMUSG00000101563 | Gm7364        | 5.00E+05 | 5.00E+05  | 18.93  | 0.0386 | 2.55E+06  | 2.55E+06 |
| ENSMUSG00000102508 | Gm37367       | 2.77E-06 | -3.61E+05 | -18.46 | 0.0201 | -2.55E+06 | 2.55E+06 |
| ENSMUSG00000089822 | Gm15759       | 4.28E+05 | 4.28E+05  | 18.71  | 0.0296 | 2.49E+06  | 2.49E+06 |
| ENSMUSG00000085748 | Gm12280       | 3.07E+05 | 3.07E+05  | 18.23  | 0.0168 | 2.36E+06  | 2.36E+06 |
| ENSMUSG00000104148 | Pcdha2        | 4.82E-06 | -2.08E+05 | -17.66 | 0.0083 | -2.27E+06 | 2.27E+06 |
| ENSMUSG00000104905 | RP23-192D21.2 | 2.36E-06 | -4.24E+05 | -18.69 | 0.0428 | -2.05E+06 | 2.05E+06 |
| ENSMUSG00000107117 | RP23-72G21.1  | 4.50E-06 | -2.22E+05 | -17.76 | 0.0133 | -1.92E+06 | 1.92E+06 |
| ENSMUSG00000067144 | Slc22a7       | 1.91E+05 | 1.91E+05  | 17.54  | 0.0105 | 1.86E+06  | 1.86E+06 |
| ENSMUSG00000098854 | Gm5118        | 2.18E+05 | 2.18E+05  | 17.73  | 0.0168 | 1.68E+06  | 1.68E+06 |
| ENSMUSG00000063953 | Amd2          | 6.93E-06 | -1.44E+05 | -17.14 | 0.0201 | -1.02E+06 | 1.02E+06 |
| ENSMUSG00000106694 | RP24-559P3.1  | 7.37E-06 | -1.36E+05 | -17.05 | 0.0201 | -9.58E+05 | 9.58E+05 |
| ENSMUSG00000041138 | Nme8          | 6.48E-06 | -1.54E+05 | -17.24 | 0.0261 | -9.55E+05 | 9.55E+05 |
| ENSMUSG00000060780 | Lrrtm1        | 7.15E-06 | -1.40E+05 | -17.09 | 0.0227 | -9.28E+05 | 9.28E+05 |
| ENSMUSG00000106677 | Ugt2a1        | 1.30E-04 | -7.71E+03 | -12.91 | 0.0002 | -5.35E+05 | 5.35E+05 |

|                    |               |          |           |        |        |           |          |
|--------------------|---------------|----------|-----------|--------|--------|-----------|----------|
| ENSMUSG00000060371 | Caln1         | 2.61E-05 | -3.84E+04 | -15.23 | 0.0420 | -1.87E+05 | 1.87E+05 |
| ENSMUSG00000106232 | RP24-362N9.4  | 3.30E-04 | -3.03E+03 | -11.57 | 0.0418 | -1.48E+04 | 1.48E+04 |
| ENSMUSG00000096764 | Gm21985       | 1.87E+03 | 1.87E+03  | 10.87  | 0.0194 | 1.34E+04  | 1.34E+04 |
| ENSMUSG00000107162 | RP23-382I10.3 | 3.28E+01 | 3.28E+01  | 5.04   | 0.0000 | 5.26E+03  | 5.26E+03 |
| ENSMUSG00000049350 | Zg16          | 1.42E+01 | 1.42E+01  | 3.82   | 0.0000 | 2.09E+03  | 2.09E+03 |
| ENSMUSG00000075070 | 4932412D23Rik | 3.24E+02 | 3.24E+02  | 8.34   | 0.0369 | 1.68E+03  | 1.68E+03 |
| ENSMUSG00000081445 | Rpl23a-ps4    | 1.26E+01 | 1.26E+01  | 3.66   | 0.0001 | 1.44E+03  | 1.44E+03 |
| ENSMUSG00000035506 | Slc12a8       | 1.05E+01 | 1.05E+01  | 3.39   | 0.0001 | 1.32E+03  | 1.32E+03 |
| ENSMUSG00000089789 | Rdh1          | 6.92E+00 | 6.92E+00  | 2.79   | 0.0000 | 1.09E+03  | 1.09E+03 |
| ENSMUSG00000042672 | Dcst1         | 5.65E+00 | 5.65E+00  | 2.50   | 0.0000 | 1.01E+03  | 1.01E+03 |
| ENSMUSG00000105311 | RP23-214I6.5  | 1.28E+02 | 1.28E+02  | 7.01   | 0.0225 | 8.57E+02  | 8.57E+02 |
| ENSMUSG00000090107 | Gm11492       | 4.56E+01 | 4.56E+01  | 5.51   | 0.0030 | 8.37E+02  | 8.37E+02 |
| ENSMUSG00000078235 | Fam43b        | 1.75E+01 | 1.75E+01  | 4.13   | 0.0005 | 7.99E+02  | 7.99E+02 |
| ENSMUSG00000082786 | Gm14489       | 1.05E+02 | 1.05E+02  | 6.71   | 0.0181 | 7.78E+02  | 7.78E+02 |
| ENSMUSG00000079584 | Gm364         | 1.59E+01 | 1.59E+01  | 3.99   | 0.0004 | 7.72E+02  | 7.72E+02 |
| ENSMUSG00000044903 | Psg22         | 2.78E+01 | 2.78E+01  | 4.80   | 0.0014 | 7.44E+02  | 7.44E+02 |
| ENSMUSG00000024223 | Armc12        | 1.22E+02 | 1.22E+02  | 6.94   | 0.0279 | 7.32E+02  | 7.32E+02 |
| ENSMUSG00000091402 | Rd3l          | 5.71E+01 | 5.71E+01  | 5.83   | 0.0065 | 7.06E+02  | 7.06E+02 |
| ENSMUSG00000000632 | Sez6          | 1.47E+02 | 1.47E+02  | 7.20   | 0.0453 | 6.90E+02  | 6.90E+02 |
| ENSMUSG00000106271 | RP24-105J12.3 | 3.47E+01 | 3.47E+01  | 5.12   | 0.0027 | 6.68E+02  | 6.68E+02 |
| ENSMUSG00000022487 | Gtsf1         | 1.96E+01 | 1.96E+01  | 4.30   | 0.0009 | 6.61E+02  | 6.61E+02 |
| ENSMUSG00000097100 | 9230104M06Rik | 4.81E+00 | 4.81E+00  | 2.27   | 0.0001 | 6.46E+02  | 6.46E+02 |
| ENSMUSG00000039342 | Ankar         | 1.08E+02 | 1.08E+02  | 6.75   | 0.0295 | 6.26E+02  | 6.26E+02 |
| ENSMUSG00000097604 | Gm17322       | 8.70E+01 | 8.70E+01  | 6.44   | 0.0202 | 6.12E+02  | 6.12E+02 |
| ENSMUSG00000081857 | Gm13624       | 1.20E+01 | 1.20E+01  | 3.58   | 0.0004 | 6.07E+02  | 6.07E+02 |
| ENSMUSG00000031766 | Slc12a3       | 1.03E+01 | 1.03E+01  | 3.36   | 0.0003 | 6.04E+02  | 6.04E+02 |
| ENSMUSG00000092246 | Gm20493       | 4.12E+01 | 4.12E+01  | 5.36   | 0.0049 | 5.89E+02  | 5.89E+02 |
| ENSMUSG00000041644 | Slc5a12       | 6.86E-02 | -1.46E+01 | -3.86  | 0.0006 | -5.88E+02 | 5.88E+02 |
| ENSMUSG00000087399 | Gm11899       | 6.71E-02 | -1.49E+01 | -3.90  | 0.0007 | -5.71E+02 | 5.71E+02 |
| ENSMUSG00000100625 | 1700016G22Rik | 1.26E+02 | 1.26E+02  | 6.98   | 0.0496 | 5.66E+02  | 5.66E+02 |
| ENSMUSG00000030495 | Slc7a10       | 1.27E-01 | -7.89E+00 | -2.98  | 0.0002 | -5.48E+02 | 5.48E+02 |
| ENSMUSG00000014686 | Ceacam16      | 6.34E+00 | 6.34E+00  | 2.66   | 0.0001 | 5.44E+02  | 5.44E+02 |
| ENSMUSG00000028661 | Epha8         | 7.70E+01 | 7.70E+01  | 6.27   | 0.0202 | 5.42E+02  | 5.42E+02 |
| ENSMUSG00000106999 | RP23-153H17.3 | 3.67E+01 | 3.67E+01  | 5.20   | 0.0054 | 4.98E+02  | 4.98E+02 |
| ENSMUSG00000051036 | Ttc24         | 8.55E+01 | 8.55E+01  | 6.42   | 0.0306 | 4.89E+02  | 4.89E+02 |
| ENSMUSG00000087443 | Ppp1r18os     | 2.35E+01 | 2.35E+01  | 4.56   | 0.0025 | 4.67E+02  | 4.67E+02 |
| ENSMUSG00000104416 | Gm37067       | 2.52E-02 | -3.96E+01 | -5.31  | 0.0074 | -4.60E+02 | 4.60E+02 |
| ENSMUSG00000101588 | Gm28265       | 2.91E+01 | 2.91E+01  | 4.86   | 0.0042 | 4.49E+02  | 4.49E+02 |
| ENSMUSG00000043747 | 1520401A03Rik | 9.69E+01 | 9.69E+01  | 6.60   | 0.0499 | 4.34E+02  | 4.34E+02 |
| ENSMUSG00000029235 | Pdcl2         | 9.95E+00 | 9.95E+00  | 3.31   | 0.0006 | 4.14E+02  | 4.14E+02 |
| ENSMUSG00000100334 | C230024C17Rik | 7.18E+01 | 7.18E+01  | 6.17   | 0.0315 | 4.05E+02  | 4.05E+02 |
| ENSMUSG00000099452 | Gm28502       | 4.37E+01 | 4.37E+01  | 5.45   | 0.0118 | 4.02E+02  | 4.02E+02 |
| ENSMUSG00000025433 | Crisp3        | 7.72E-02 | -1.30E+01 | -3.70  | 0.0010 | -4.01E+02 | 4.01E+02 |
| ENSMUSG00000072625 | Gdf2          | 8.35E-02 | -1.20E+01 | -3.58  | 0.0010 | -3.88E+02 | 3.88E+02 |
| ENSMUSG00000020712 | Tcam1         | 5.12E+01 | 5.12E+01  | 5.68   | 0.0174 | 3.88E+02  | 3.88E+02 |
| ENSMUSG00000086125 | Gm15942       | 9.43E-02 | -1.06E+01 | -3.41  | 0.0008 | -3.84E+02 | 3.84E+02 |
| ENSMUSG00000078444 | Gm10941       | 9.88E+00 | 9.88E+00  | 3.30   | 0.0007 | 3.80E+02  | 3.80E+02 |
| ENSMUSG00000090129 | Olfr287       | 8.39E+01 | 8.39E+01  | 6.39   | 0.0499 | 3.75E+02  | 3.75E+02 |
| ENSMUSG00000046490 | Rnf222        | 1.11E+01 | 1.11E+01  | 3.48   | 0.0009 | 3.70E+02  | 3.70E+02 |
| ENSMUSG00000085307 | Gm11525       | 1.32E+01 | 1.32E+01  | 3.72   | 0.0013 | 3.68E+02  | 3.68E+02 |
| ENSMUSG00000050334 | C130071C03Rik | 1.98E+01 | 1.98E+01  | 4.31   | 0.0032 | 3.50E+02  | 3.50E+02 |
| ENSMUSG00000044172 | Ptx4          | 5.36E+01 | 5.36E+01  | 5.74   | 0.0236 | 3.49E+02  | 3.49E+02 |
| ENSMUSG00000083178 | Gm12187       | 7.75E+00 | 7.75E+00  | 2.95   | 0.0005 | 3.46E+02  | 3.46E+02 |
| ENSMUSG00000011463 | Cpb1          | 2.21E-01 | -4.52E+00 | -2.18  | 0.0002 | -3.41E+02 | 3.41E+02 |
| ENSMUSG00000097848 | Gm807         | 2.92E+01 | 2.92E+01  | 4.87   | 0.0080 | 3.27E+02  | 3.27E+02 |
| ENSMUSG00000057606 | Colq          | 1.20E-01 | -8.34E+00 | -3.06  | 0.0007 | -3.11E+02 | 3.11E+02 |
| ENSMUSG00000021200 | Asb2          | 2.46E-01 | -4.07E+00 | -2.02  | 0.0002 | -3.04E+02 | 3.04E+02 |
| ENSMUSG00000042078 | Svop          | 4.41E+01 | 4.41E+01  | 5.46   | 0.0212 | 3.03E+02  | 3.03E+02 |
| ENSMUSG00000103457 | Gm37042       | 8.44E+00 | 8.44E+00  | 3.08   | 0.0008 | 3.00E+02  | 3.00E+02 |
| ENSMUSG00000083090 | Gm11736       | 5.07E+01 | 5.07E+01  | 5.66   | 0.0298 | 2.94E+02  | 2.94E+02 |
| ENSMUSG00000107167 | RP23-446N16.6 | 5.32E+01 | 5.32E+01  | 5.73   | 0.0331 | 2.92E+02  | 2.92E+02 |
| ENSMUSG00000101414 | Gm29101       | 4.88E-02 | -2.05E+01 | -4.36  | 0.0050 | -2.90E+02 | 2.90E+02 |
| ENSMUSG00000002289 | Angptl4       | 2.72E+00 | 2.72E+00  | 1.44   | 0.0001 | 2.89E+02  | 2.89E+02 |
| ENSMUSG00000010086 | Rnf112        | 7.78E-02 | -1.29E+01 | -3.68  | 0.0020 | -2.89E+02 | 2.89E+02 |
| ENSMUSG00000055523 | Gucy2g        | 6.17E+00 | 6.17E+00  | 2.63   | 0.0005 | 2.83E+02  | 2.83E+02 |
| ENSMUSG00000086321 | Gm11413       | 2.06E+01 | 2.06E+01  | 4.36   | 0.0053 | 2.82E+02  | 2.82E+02 |
| ENSMUSG00000078640 | Gm11627       | 6.33E-02 | -1.58E+01 | -3.98  | 0.0033 | -2.77E+02 | 2.77E+02 |

|                     |               |          |           |       |        |           |          |
|---------------------|---------------|----------|-----------|-------|--------|-----------|----------|
| ENSMUSG00000097676  | Gm26612       | 2.96E+01 | 2.96E+01  | 4.89  | 0.0118 | 2.72E+02  | 2.72E+02 |
| ENSMUSG00000036790  | Slitrk2       | 2.12E-02 | -4.72E+01 | -5.56 | 0.0305 | -2.70E+02 | 2.70E+02 |
| ENSMUSG00000071532  | Gm10335       | 8.71E-02 | -1.15E+01 | -3.52 | 0.0019 | -2.65E+02 | 2.65E+02 |
| ENSMUSG00000069189  | Zdhhc11       | 4.66E+01 | 4.66E+01  | 5.54  | 0.0311 | 2.64E+02  | 2.64E+02 |
| ENSMUSG00000107208  | RP23-319P12.6 | 4.79E-01 | -2.09E+00 | -1.06 | 0.0001 | -2.60E+02 | 2.60E+02 |
| ENSMUSG00000023045  | Soat2         | 4.57E+00 | 4.57E+00  | 2.19  | 0.0003 | 2.54E+02  | 2.54E+02 |
| ENSMUSG00000041293  | Adgrf1        | 2.52E+01 | 2.52E+01  | 4.66  | 0.0099 | 2.53E+02  | 2.53E+02 |
| ENSMUSG00000085976  | Gm13816       | 1.53E-01 | -6.51E+00 | -2.70 | 0.0007 | -2.52E+02 | 2.52E+02 |
| ENSMUSG00000097184  | 4632428C04Rik | 2.86E-01 | -3.50E+00 | -1.81 | 0.0002 | -2.47E+02 | 2.47E+02 |
| ENSMUSG00000082360  | Gm8814        | 1.94E+01 | 1.94E+01  | 4.28  | 0.0062 | 2.47E+02  | 2.47E+02 |
| ENSMUSG00000055061  | 4931431C16Rik | 4.34E+00 | 4.34E+00  | 2.12  | 0.0003 | 2.41E+02  | 2.41E+02 |
| ENSMUSG00000041552  | Ptchd1        | 6.84E-02 | -1.46E+01 | -3.87 | 0.0037 | -2.40E+02 | 2.40E+02 |
| ENSMUSG00000103473  | Gm37696       | 4.49E+00 | 4.49E+00  | 2.17  | 0.0004 | 2.37E+02  | 2.37E+02 |
| ENSMUSG00000099924  | Gm28320       | 2.93E-01 | -3.41E+00 | -1.77 | 0.0002 | -2.33E+02 | 2.33E+02 |
| ENSMUSG00000027233  | Patl2         | 2.80E+01 | 2.80E+01  | 4.81  | 0.0144 | 2.33E+02  | 2.33E+02 |
| ENSMUSG00000040314  | Ctsg          | 8.86E+00 | 8.86E+00  | 3.15  | 0.0015 | 2.32E+02  | 2.32E+02 |
| ENSMUSG00000095642  | Ighv14-3      | 5.64E+00 | 5.64E+00  | 2.50  | 0.0006 | 2.30E+02  | 2.30E+02 |
| ENSMUSG00000098778  | Gm27231       | 2.19E-02 | -4.56E+01 | -5.51 | 0.0399 | -2.29E+02 | 2.29E+02 |
| ENSMUSG00000026824  | Kcnj3         | 1.32E-01 | -7.60E+00 | -2.93 | 0.0012 | -2.23E+02 | 2.23E+02 |
| ENSMUSG00000060332  | Tmc2          | 7.98E+00 | 7.98E+00  | 3.00  | 0.0013 | 2.23E+02  | 2.23E+02 |
| ENSMUSG00000004542  | Psg19         | 2.88E+01 | 2.88E+01  | 4.85  | 0.0170 | 2.21E+02  | 2.21E+02 |
| ENSMUSG00000086595  | Gm12214       | 8.59E+00 | 8.59E+00  | 3.10  | 0.0016 | 2.17E+02  | 2.17E+02 |
| ENSMUSG00000067279  | Ppp1r3c       | 1.74E-01 | -5.75E+00 | -2.52 | 0.0007 | -2.14E+02 | 2.14E+02 |
| ENSMUSG00000066319  | Rtp3          | 1.14E-01 | -8.79E+00 | -3.14 | 0.0017 | -2.13E+02 | 2.13E+02 |
| ENSMUSG00000104875  | RP23-301L9.4  | 3.35E+01 | 3.35E+01  | 5.06  | 0.0272 | 2.03E+02  | 2.03E+02 |
| ENSMUSG00000029848  | Stra8         | 4.04E+01 | 4.04E+01  | 5.34  | 0.0402 | 2.02E+02  | 2.02E+02 |
| ENSMUSG00000097036  | 1110036E04Rik | 4.40E+01 | 4.40E+01  | 5.46  | 0.0480 | 2.01E+02  | 2.01E+02 |
| ENSMUSG00000086275  | 1700121C08Rik | 2.12E+01 | 2.12E+01  | 4.40  | 0.0111 | 2.01E+02  | 2.01E+02 |
| ENSMUSG00000025902  | Sox17         | 2.14E-01 | -4.67E+00 | -2.22 | 0.0006 | -1.99E+02 | 1.99E+02 |
| ENSMUSG00000019230  | Lhx9          | 2.73E+01 | 2.73E+01  | 4.77  | 0.0194 | 1.96E+02  | 1.96E+02 |
| ENSMUSG00000031957  | Ctrb1         | 3.37E+01 | 3.37E+01  | 5.07  | 0.0302 | 1.94E+02  | 1.94E+02 |
| ENSMUSG00000053461  | Hhip12        | 8.73E+00 | 8.73E+00  | 3.13  | 0.0021 | 1.92E+02  | 1.92E+02 |
| ENSMUSG00000048626  | Klf17         | 3.83E+01 | 3.83E+01  | 5.26  | 0.0403 | 1.91E+02  | 1.91E+02 |
| ENSMUSG00000059540  | Tcea2         | 2.36E+00 | 2.36E+00  | 1.24  | 0.0002 | 1.90E+02  | 1.90E+02 |
| ENSMUSG00000100129  | Gm29064       | 9.31E+00 | 9.31E+00  | 3.22  | 0.0024 | 1.89E+02  | 1.89E+02 |
| ENSMUSG00000049001  | Ndnf          | 2.94E-01 | -3.40E+00 | -1.77 | 0.0003 | -1.88E+02 | 1.88E+02 |
| ENSMUSG00000036907  | C1ql2         | 5.35E-02 | -1.87E+01 | -4.22 | 0.0100 | -1.87E+02 | 1.87E+02 |
| ENSMUSG00000028946  | Hes3          | 2.10E+01 | 2.10E+01  | 4.40  | 0.0131 | 1.84E+02  | 1.84E+02 |
| ENSMUSG00000105444  | RP24-291E8.3  | 7.31E+00 | 7.31E+00  | 2.87  | 0.0016 | 1.81E+02  | 1.81E+02 |
| ENSMUSG00000061911  | Myt1l         | 1.91E+01 | 1.91E+01  | 4.25  | 0.0112 | 1.81E+02  | 1.81E+02 |
| ENSMUSG00000078921  | Tgtp2         | 2.84E-01 | -3.52E+00 | -1.81 | 0.0004 | -1.79E+02 | 1.79E+02 |
| ENSMUSG00000032921  | Odf4          | 1.35E+01 | 1.35E+01  | 3.75  | 0.0056 | 1.79E+02  | 1.79E+02 |
| ENSMUSG00000084785  | Gm13972       | 2.14E+01 | 2.14E+01  | 4.42  | 0.0150 | 1.75E+02  | 1.75E+02 |
| ENSMUSG00000078721  | Gm12429       | 4.31E+00 | 4.31E+00  | 2.11  | 0.0006 | 1.73E+02  | 1.73E+02 |
| ENSMUSG00000039760  | Il22ra2       | 3.91E+00 | 3.91E+00  | 1.97  | 0.0005 | 1.71E+02  | 1.71E+02 |
| ENSMUSG00000026413  | Pkp1          | 3.21E+01 | 3.21E+01  | 5.00  | 0.0356 | 1.70E+02  | 1.70E+02 |
| ENSMUSG00000097369  | Gm26545       | 5.98E+00 | 5.98E+00  | 2.58  | 0.0012 | 1.69E+02  | 1.69E+02 |
| ENSMUSG00000034145  | Tmem63c       | 3.91E+00 | 3.91E+00  | 1.97  | 0.0006 | 1.67E+02  | 1.67E+02 |
| ENSMUSG00000105352  | RP23-195B3.5  | 1.45E+01 | 1.45E+01  | 3.86  | 0.0079 | 1.64E+02  | 1.64E+02 |
| ENSMUSG00000033044  | Dhrs7c        | 1.17E-01 | -8.54E+00 | -3.09 | 0.0027 | -1.63E+02 | 1.63E+02 |
| ENSMUSG00000005892  | Trh           | 9.71E+00 | 9.71E+00  | 3.28  | 0.0036 | 1.63E+02  | 1.63E+02 |
| ENSMUSG00000101828  | D130051D11Rik | 1.61E+01 | 1.61E+01  | 4.01  | 0.0098 | 1.63E+02  | 1.63E+02 |
| ENSMUSG00000079355  | Ackr4         | 4.48E-01 | -2.23E+00 | -1.16 | 0.0002 | -1.62E+02 | 1.62E+02 |
| ENSMUSG00000103727  | Gm37097       | 2.34E+01 | 2.34E+01  | 4.55  | 0.0228 | 1.55E+02  | 1.55E+02 |
| ENSMUSG00000022249  | Ttc23l        | 2.52E+01 | 2.52E+01  | 4.66  | 0.0266 | 1.55E+02  | 1.55E+02 |
| ENSMUSG00000084382  | Gm3267        | 4.83E-02 | -2.07E+01 | -4.37 | 0.0180 | -1.54E+02 | 1.54E+02 |
| ENSMUSG000000038193 | Hand2         | 9.17E-02 | -1.09E+01 | -3.45 | 0.0051 | -1.53E+02 | 1.53E+02 |
| ENSMUSG00000097974  | Gm10605       | 1.01E+01 | 1.01E+01  | 3.34  | 0.0045 | 1.51E+02  | 1.51E+02 |
| ENSMUSG00000093536  | Smim17        | 1.62E-01 | -6.19E+00 | -2.63 | 0.0017 | -1.50E+02 | 1.50E+02 |
| ENSMUSG00000079460  | 4933403O08Rik | 7.74E-02 | -1.29E+01 | -3.69 | 0.0074 | -1.50E+02 | 1.50E+02 |
| ENSMUSG00000105443  | RP23-339I6.3  | 1.43E+01 | 1.43E+01  | 3.84  | 0.0092 | 1.49E+02  | 1.49E+02 |
| ENSMUSG00000103824  | Gm38177       | 1.85E-01 | -5.41E+00 | -2.44 | 0.0013 | -1.49E+02 | 1.49E+02 |
| ENSMUSG00000107256  | RP24-297N9.13 | 2.45E+01 | 2.45E+01  | 4.61  | 0.0273 | 1.48E+02  | 1.48E+02 |
| ENSMUSG00000088363  | Gm23497       | 4.85E-02 | -2.06E+01 | -4.36 | 0.0196 | -1.47E+02 | 1.47E+02 |
| ENSMUSG00000097915  | A330009N23Rik | 1.48E-01 | -6.76E+00 | -2.76 | 0.0021 | -1.46E+02 | 1.46E+02 |
| ENSMUSG00000097268  | Gm26805       | 1.05E+01 | 1.05E+01  | 3.39  | 0.0052 | 1.46E+02  | 1.46E+02 |
| ENSMUSG00000009292  | Trpm2         | 2.33E+00 | 2.33E+00  | 1.22  | 0.0003 | 1.45E+02  | 1.45E+02 |

|                     |               |          |           |       |        |           |          |
|---------------------|---------------|----------|-----------|-------|--------|-----------|----------|
| ENSMUSG00000030017  | Reg3g         | 4.95E+00 | 4.95E+00  | 2.31  | 0.0012 | 1.44E+02  | 1.44E+02 |
| ENSMUSG00000103686  | Gm37073       | 2.31E+01 | 2.31E+01  | 4.53  | 0.0257 | 1.44E+02  | 1.44E+02 |
| ENSMUSG000000031394 | Opn1mw        | 2.15E+01 | 2.15E+01  | 4.43  | 0.0225 | 1.44E+02  | 1.44E+02 |
| ENSMUSG000000073380 | Arrdc5        | 2.02E+01 | 2.02E+01  | 4.34  | 0.0198 | 1.43E+02  | 1.43E+02 |
| ENSMUSG000000070436 | Serpinh1      | 4.13E-01 | -2.42E+00 | -1.27 | 0.0003 | -1.43E+02 | 1.43E+02 |
| ENSMUSG000000039239 | Tgfb2         | 3.77E-01 | -2.65E+00 | -1.41 | 0.0004 | -1.41E+02 | 1.41E+02 |
| ENSMUSG000000020875 | Hoxb9         | 1.72E+01 | 1.72E+01  | 4.11  | 0.0152 | 1.40E+02  | 1.40E+02 |
| ENSMUSG00000102715  | Gm6209        | 3.82E+00 | 3.82E+00  | 1.93  | 0.0008 | 1.39E+02  | 1.39E+02 |
| ENSMUSG000000015843 | Rxrg          | 6.23E-02 | -1.60E+01 | -4.00 | 0.0139 | -1.36E+02 | 1.36E+02 |
| ENSMUSG000000072423 | Psemb11       | 1.22E+01 | 1.22E+01  | 3.60  | 0.0081 | 1.35E+02  | 1.35E+02 |
| ENSMUSG000000031870 | Pgr           | 2.47E-01 | -4.05E+00 | -2.02 | 0.0009 | -1.33E+02 | 1.33E+02 |
| ENSMUSG000000085185 | BC028777      | 3.51E+00 | 3.51E+00  | 1.81  | 0.0007 | 1.33E+02  | 1.33E+02 |
| ENSMUSG000000084198 | Gm13711       | 4.73E+00 | 4.73E+00  | 2.24  | 0.0013 | 1.32E+02  | 1.32E+02 |
| ENSMUSG00000107037  | RP24-544J6.3  | 2.43E+01 | 2.43E+01  | 4.60  | 0.0340 | 1.32E+02  | 1.32E+02 |
| ENSMUSG000000088527 | Gm26086       | 1.30E-01 | -7.72E+00 | -2.95 | 0.0035 | -1.31E+02 | 1.31E+02 |
| ENSMUSG000000010064 | Slc38a3       | 2.09E+01 | 2.09E+01  | 4.39  | 0.0257 | 1.30E+02  | 1.30E+02 |
| ENSMUSG000000001865 | Cpa3          | 2.20E-01 | -4.55E+00 | -2.18 | 0.0012 | -1.30E+02 | 1.30E+02 |
| ENSMUSG00000103408  | Gm37933       | 6.32E+00 | 6.32E+00  | 2.66  | 0.0024 | 1.30E+02  | 1.30E+02 |
| ENSMUSG000000059639 | Clec4a4       | 4.32E+00 | 4.32E+00  | 2.11  | 0.0011 | 1.30E+02  | 1.30E+02 |
| ENSMUSG000000057173 | Rfx8          | 2.54E+01 | 2.54E+01  | 4.67  | 0.0386 | 1.30E+02  | 1.30E+02 |
| ENSMUSG000000025646 | Atrip         | 3.49E+00 | 3.49E+00  | 1.80  | 0.0007 | 1.30E+02  | 1.30E+02 |
| ENSMUSG000000030324 | Rho           | 3.86E+00 | 3.86E+00  | 1.95  | 0.0009 | 1.29E+02  | 1.29E+02 |
| ENSMUSG000000038074 | Fkbp14        | 3.18E+00 | 3.18E+00  | 1.67  | 0.0006 | 1.29E+02  | 1.29E+02 |
| ENSMUSG000000033644 | Piwil2        | 3.17E+00 | 3.17E+00  | 1.67  | 0.0006 | 1.29E+02  | 1.29E+02 |
| ENSMUSG000000086701 | Gm13595       | 6.14E-02 | -1.63E+01 | -4.03 | 0.0161 | -1.28E+02 | 1.28E+02 |
| ENSMUSG000000046916 | Myct1         | 2.15E-01 | -4.66E+00 | -2.22 | 0.0013 | -1.27E+02 | 1.27E+02 |
| ENSMUSG000000097430 | Gm10544       | 2.02E-01 | -4.95E+00 | -2.31 | 0.0015 | -1.27E+02 | 1.27E+02 |
| ENSMUSG000000079163 | Gm15498       | 1.83E+01 | 1.83E+01  | 4.19  | 0.0208 | 1.27E+02  | 1.27E+02 |
| ENSMUSG000000034837 | Gnat1         | 1.36E+01 | 1.36E+01  | 3.76  | 0.0115 | 1.26E+02  | 1.26E+02 |
| ENSMUSG000000054958 | Nt5c1a        | 1.66E-01 | -6.03E+00 | -2.59 | 0.0023 | -1.25E+02 | 1.25E+02 |
| ENSMUSG000000062329 | Cyt1l         | 2.67E-01 | -3.75E+00 | -1.91 | 0.0009 | -1.25E+02 | 1.25E+02 |
| ENSMUSG000000084011 | Gm12969       | 8.77E+00 | 8.77E+00  | 3.13  | 0.0050 | 1.24E+02  | 1.24E+02 |
| ENSMUSG00000102825  | Gm36990       | 9.87E+00 | 9.87E+00  | 3.30  | 0.0064 | 1.24E+02  | 1.24E+02 |
| ENSMUSG000000034818 | Celf5         | 1.21E+01 | 1.21E+01  | 3.59  | 0.0095 | 1.23E+02  | 1.23E+02 |
| ENSMUSG000000028332 | Hemgn         | 2.04E+01 | 2.04E+01  | 4.35  | 0.0274 | 1.23E+02  | 1.23E+02 |
| ENSMUSG000000073494 | Sh2d1b2       | 2.06E+01 | 2.06E+01  | 4.37  | 0.0282 | 1.23E+02  | 1.23E+02 |
| ENSMUSG000000091336 | Gm17157       | 1.04E-01 | -9.62E+00 | -3.27 | 0.0062 | -1.22E+02 | 1.22E+02 |
| ENSMUSG000000031111 | Igsf1         | 1.83E-01 | -5.46E+00 | -2.45 | 0.0020 | -1.22E+02 | 1.22E+02 |
| ENSMUSG000000008590 | Htr3b         | 2.11E+01 | 2.11E+01  | 4.40  | 0.0301 | 1.21E+02  | 1.21E+02 |
| ENSMUSG000000065582 | Mir194-2      | 2.40E+01 | 2.40E+01  | 4.59  | 0.0402 | 1.20E+02  | 1.20E+02 |
| ENSMUSG000000086526 | Gm12762       | 8.75E+00 | 8.75E+00  | 3.13  | 0.0054 | 1.19E+02  | 1.19E+02 |
| ENSMUSG000000038704 | Aspdh         | 1.16E-01 | -8.59E+00 | -3.10 | 0.0052 | -1.19E+02 | 1.19E+02 |
| ENSMUSG000000077567 | Gm23200       | 8.97E-02 | -1.11E+01 | -3.48 | 0.0090 | -1.17E+02 | 1.17E+02 |
| ENSMUSG000000040258 | Nxph4         | 1.29E+01 | 1.29E+01  | 3.69  | 0.0121 | 1.17E+02  | 1.17E+02 |
| ENSMUSG000000001027 | Scn4a         | 1.51E+01 | 1.51E+01  | 3.91  | 0.0169 | 1.16E+02  | 1.16E+02 |
| ENSMUSG000000036334 | Igsf10        | 1.85E-01 | -5.42E+00 | -2.44 | 0.0022 | -1.16E+02 | 1.16E+02 |
| ENSMUSG000000086542 | Gm13782       | 6.58E+00 | 6.58E+00  | 2.72  | 0.0033 | 1.15E+02  | 1.15E+02 |
| ENSMUSG000000054258 | Gm5082        | 5.94E+00 | 5.94E+00  | 2.57  | 0.0027 | 1.15E+02  | 1.15E+02 |
| ENSMUSG00000101895  | Gm28981       | 2.18E+01 | 2.18E+01  | 4.45  | 0.0359 | 1.15E+02  | 1.15E+02 |
| ENSMUSG00000102414  | Gm36938       | 2.28E+01 | 2.28E+01  | 4.51  | 0.0396 | 1.15E+02  | 1.15E+02 |
| ENSMUSG000000043496 | Tril          | 1.80E-01 | -5.56E+00 | -2.47 | 0.0024 | -1.14E+02 | 1.14E+02 |
| ENSMUSG000000040657 | 1700063H04Rik | 1.65E+01 | 1.65E+01  | 4.05  | 0.0212 | 1.14E+02  | 1.14E+02 |
| ENSMUSG000000006204 | 5430419D17Rik | 8.86E-02 | -1.13E+01 | -3.50 | 0.0099 | -1.13E+02 | 1.13E+02 |
| ENSMUSG000000072679 | D6Ertd474e    | 2.36E+01 | 2.36E+01  | 4.56  | 0.0434 | 1.13E+02  | 1.13E+02 |
| ENSMUSG000000023247 | Guca2a        | 2.29E+01 | 2.29E+01  | 4.52  | 0.0411 | 1.13E+02  | 1.13E+02 |
| ENSMUSG000000001131 | Timp1         | 5.68E+00 | 5.68E+00  | 2.51  | 0.0025 | 1.13E+02  | 1.13E+02 |
| ENSMUSG000000031170 | Slc38a5       | 1.74E-01 | -5.75E+00 | -2.52 | 0.0026 | -1.12E+02 | 1.12E+02 |
| ENSMUSG000000042985 | Upk3b         | 2.47E-01 | -4.05E+00 | -2.02 | 0.0013 | -1.12E+02 | 1.12E+02 |
| ENSMUSG000000024421 | Lama3         | 3.25E-01 | -3.07E+00 | -1.62 | 0.0008 | -1.10E+02 | 1.10E+02 |
| ENSMUSG000000087646 | Gm1667        | 7.19E-02 | -1.39E+01 | -3.80 | 0.0160 | -1.10E+02 | 1.10E+02 |
| ENSMUSG000000081076 | Rpsa-ps4      | 1.40E+01 | 1.40E+01  | 3.80  | 0.0161 | 1.10E+02  | 1.10E+02 |
| ENSMUSG00000104237  | Gm33533       | 1.40E+01 | 1.40E+01  | 3.80  | 0.0161 | 1.10E+02  | 1.10E+02 |
| ENSMUSG00000101754  | Gm2987        | 1.22E-01 | -8.22E+00 | -3.04 | 0.0056 | -1.10E+02 | 1.10E+02 |
| ENSMUSG000000045928 | 4933440M02Rik | 4.89E+00 | 4.89E+00  | 2.29  | 0.0020 | 1.10E+02  | 1.10E+02 |
| ENSMUSG000000040430 | Pitpnc1       | 4.01E-01 | -2.50E+00 | -1.32 | 0.0005 | -1.09E+02 | 1.09E+02 |
| ENSMUSG00000104701  | RP23-336O18.4 | 2.16E+01 | 2.16E+01  | 4.43  | 0.0400 | 1.08E+02  | 1.08E+02 |
| ENSMUSG000000021902 | Phf7          | 3.94E+00 | 3.94E+00  | 1.98  | 0.0013 | 1.08E+02  | 1.08E+02 |

|                    |               |          |           |       |        |           |          |
|--------------------|---------------|----------|-----------|-------|--------|-----------|----------|
| ENSMUSG00000033872 | Best4-ps      | 6.51E+00 | 6.51E+00  | 2.70  | 0.0037 | 1.08E+02  | 1.08E+02 |
| ENSMUSG00000086904 | Gm13404       | 6.94E-02 | -1.44E+01 | -3.85 | 0.0180 | -1.07E+02 | 1.07E+02 |
| ENSMUSG00000048126 | Col6a3        | 1.99E-01 | -5.01E+00 | -2.33 | 0.0022 | -1.07E+02 | 1.07E+02 |
| ENSMUSG00000082570 | Gm15711       | 3.11E-01 | -3.22E+00 | -1.69 | 0.0009 | -1.07E+02 | 1.07E+02 |
| ENSMUSG00000055865 | Fam19a3       | 9.19E+00 | 9.19E+00  | 3.20  | 0.0074 | 1.07E+02  | 1.07E+02 |
| ENSMUSG00000098608 | Mir6981       | 4.78E-02 | -2.09E+01 | -4.39 | 0.0394 | -1.06E+02 | 1.06E+02 |
| ENSMUSG00000084947 | Gm15594       | 2.03E-01 | -4.93E+00 | -2.30 | 0.0022 | -1.05E+02 | 1.05E+02 |
| ENSMUSG00000043770 | Gm12481       | 4.84E-01 | -2.07E+00 | -1.05 | 0.0004 | -1.04E+02 | 1.04E+02 |
| ENSMUSG00000022103 | Gfra2         | 1.58E-01 | -6.35E+00 | -2.67 | 0.0037 | -1.04E+02 | 1.04E+02 |
| ENSMUSG00000038691 | Mbd3l1        | 8.96E+00 | 8.96E+00  | 3.16  | 0.0074 | 1.04E+02  | 1.04E+02 |
| ENSMUSG00000091648 | C2cd4d        | 1.16E-01 | -8.62E+00 | -3.11 | 0.0069 | -1.04E+02 | 1.04E+02 |
| ENSMUSG00000094686 | Ccl21a        | 1.13E-01 | -8.84E+00 | -3.14 | 0.0073 | -1.03E+02 | 1.03E+02 |
| ENSMUSG00000084915 | C230037L18Rik | 6.01E+00 | 6.01E+00  | 2.59  | 0.0034 | 1.03E+02  | 1.03E+02 |
| ENSMUSG00000066170 | E230001N04Rik | 8.55E+00 | 8.55E+00  | 3.10  | 0.0069 | 1.03E+02  | 1.03E+02 |
| ENSMUSG00000097260 | Gm5706        | 7.35E-02 | -1.36E+01 | -3.77 | 0.0175 | -1.03E+02 | 1.03E+02 |
| ENSMUSG00000070111 | Gm10286       | 1.53E+01 | 1.53E+01  | 3.94  | 0.0223 | 1.03E+02  | 1.03E+02 |
| ENSMUSG00000028862 | Map3k6        | 4.35E+00 | 4.35E+00  | 2.12  | 0.0018 | 1.02E+02  | 1.02E+02 |
| ENSMUSG00000030270 | Cpne9         | 6.77E+00 | 6.77E+00  | 2.76  | 0.0044 | 1.02E+02  | 1.02E+02 |
| ENSMUSG00000097298 | A130057D12Rik | 9.91E+00 | 9.91E+00  | 3.31  | 0.0095 | 1.02E+02  | 1.02E+02 |
| ENSMUSG00000046881 | Olf374        | 7.12E+00 | 7.12E+00  | 2.83  | 0.0050 | 1.00E+02  | 1.00E+02 |
| ENSMUSG00000062561 | Gm10118       | 2.00E-01 | -5.00E+00 | -2.32 | 0.0025 | -9.95E+01 | 9.95E+01 |
| ENSMUSG00000100714 | 2010308F09Rik | 9.93E+00 | 9.93E+00  | 3.31  | 0.0101 | 9.89E+01  | 9.89E+01 |
| ENSMUSG00000101082 | Gm28069       | 5.69E+00 | 5.69E+00  | 2.51  | 0.0034 | 9.81E+01  | 9.81E+01 |
| ENSMUSG00000086709 | Gm16263       | 1.08E-01 | -9.22E+00 | -3.21 | 0.0090 | -9.70E+01 | 9.70E+01 |
| ENSMUSG00000027500 | Stmn2         | 1.76E-01 | -5.68E+00 | -2.51 | 0.0034 | -9.69E+01 | 9.69E+01 |
| ENSMUSG00000026592 | Tex35         | 4.77E+00 | 4.77E+00  | 2.25  | 0.0024 | 9.66E+01  | 9.66E+01 |
| ENSMUSG00000099240 | Gm27539       | 7.88E-02 | -1.27E+01 | -3.67 | 0.0175 | -9.60E+01 | 9.60E+01 |
| ENSMUSG00000032357 | Tinag         | 1.55E-01 | -6.45E+00 | -2.69 | 0.0046 | -9.55E+01 | 9.55E+01 |
| ENSMUSG00000051965 | Nanos2        | 2.03E+01 | 2.03E+01  | 4.35  | 0.0455 | 9.54E+01  | 9.54E+01 |
| ENSMUSG00000059434 | Gckr          | 7.26E+00 | 7.26E+00  | 2.86  | 0.0058 | 9.54E+01  | 9.54E+01 |
| ENSMUSG00000105403 | RP24-267D17.1 | 2.40E-01 | -4.16E+00 | -2.06 | 0.0019 | -9.48E+01 | 9.48E+01 |
| ENSMUSG00000082816 | Gm11953       | 1.75E+01 | 1.75E+01  | 4.13  | 0.0346 | 9.42E+01  | 9.42E+01 |
| ENSMUSG00000094174 | Ighv6-4       | 1.08E-01 | -9.29E+00 | -3.22 | 0.0101 | -9.26E+01 | 9.26E+01 |
| ENSMUSG00000059657 | Stfa211       | 3.18E+00 | 3.18E+00  | 1.67  | 0.0012 | 9.24E+01  | 9.24E+01 |
| ENSMUSG00000051177 | Plcb1         | 2.47E-01 | -4.04E+00 | -2.02 | 0.0019 | -9.23E+01 | 9.23E+01 |
| ENSMUSG00000028068 | Iqgap3        | 6.74E+00 | 6.74E+00  | 2.75  | 0.0054 | 9.16E+01  | 9.16E+01 |
| ENSMUSG00000106518 | RP23-178N8.3  | 3.55E+00 | 3.55E+00  | 1.83  | 0.0015 | 9.16E+01  | 9.16E+01 |
| ENSMUSG00000085196 | Gm14963       | 1.07E+01 | 1.07E+01  | 3.43  | 0.0140 | 9.08E+01  | 9.08E+01 |
| ENSMUSG00000030781 | Slc5a2        | 1.06E+01 | 1.06E+01  | 3.40  | 0.0138 | 9.00E+01  | 9.00E+01 |
| ENSMUSG00000056271 | Lman1l        | 7.55E+00 | 7.55E+00  | 2.92  | 0.0071 | 8.98E+01  | 8.98E+01 |
| ENSMUSG00000051359 | Ncald         | 2.51E-01 | -3.98E+00 | -1.99 | 0.0020 | -8.91E+01 | 8.91E+01 |
| ENSMUSG00000037411 | Serpine1      | 5.08E+00 | 5.08E+00  | 2.35  | 0.0033 | 8.90E+01  | 8.90E+01 |
| ENSMUSG00000098043 | Gm26980       | 1.42E+01 | 1.42E+01  | 3.83  | 0.0260 | 8.82E+01  | 8.82E+01 |
| ENSMUSG00000045381 | Olf433        | 5.62E-02 | -1.78E+01 | -4.15 | 0.0412 | -8.77E+01 | 8.77E+01 |
| ENSMUSG00000039883 | Lrrc17        | 1.97E-01 | -5.08E+00 | -2.34 | 0.0034 | -8.74E+01 | 8.74E+01 |
| ENSMUSG00000082941 | Gm12850       | 1.83E-01 | -5.47E+00 | -2.45 | 0.0039 | -8.73E+01 | 8.73E+01 |
| ENSMUSG00000086767 | Gm13070       | 2.74E+00 | 2.74E+00  | 1.45  | 0.0010 | 8.73E+01  | 8.73E+01 |
| ENSMUSG00000022586 | Ly6i          | 5.62E+00 | 5.62E+00  | 2.49  | 0.0042 | 8.69E+01  | 8.69E+01 |
| ENSMUSG00000057182 | Scn3a         | 1.80E-01 | -5.54E+00 | -2.47 | 0.0042 | -8.60E+01 | 8.60E+01 |
| ENSMUSG00000021743 | Fezf2         | 1.03E+01 | 1.03E+01  | 3.37  | 0.0145 | 8.59E+01  | 8.59E+01 |
| ENSMUSG00000054003 | Tdrd9         | 1.58E+01 | 1.58E+01  | 3.98  | 0.0340 | 8.57E+01  | 8.57E+01 |
| ENSMUSG00000070337 | Gpr179        | 3.01E+00 | 3.01E+00  | 1.59  | 0.0012 | 8.56E+01  | 8.56E+01 |
| ENSMUSG00000074783 | AU019990      | 1.41E+01 | 1.41E+01  | 3.82  | 0.0272 | 8.54E+01  | 8.54E+01 |
| ENSMUSG00000086313 | Gm15940       | 1.21E-01 | -8.30E+00 | -3.05 | 0.0095 | -8.50E+01 | 8.50E+01 |
| ENSMUSG00000023828 | Slc22a3       | 2.90E-01 | -3.45E+00 | -1.79 | 0.0017 | -8.49E+01 | 8.49E+01 |
| ENSMUSG00000040405 | Havcr1        | 1.93E-01 | -5.19E+00 | -2.38 | 0.0037 | -8.49E+01 | 8.49E+01 |
| ENSMUSG00000020123 | Avpr1a        | 2.22E-01 | -4.50E+00 | -2.17 | 0.0028 | -8.48E+01 | 8.48E+01 |
| ENSMUSG00000028339 | Col15a1       | 3.66E-01 | -2.73E+00 | -1.45 | 0.0010 | -8.47E+01 | 8.47E+01 |
| ENSMUSG00000074224 | 4932431P20Rik | 1.73E+01 | 1.73E+01  | 4.11  | 0.0416 | 8.46E+01  | 8.46E+01 |
| ENSMUSG00000073018 | Gm1070        | 1.39E+01 | 1.39E+01  | 3.79  | 0.0271 | 8.41E+01  | 8.41E+01 |
| ENSMUSG00000026175 | Vil1          | 7.72E+00 | 7.72E+00  | 2.95  | 0.0084 | 8.41E+01  | 8.41E+01 |
| ENSMUSG00000057719 | Sh3rf2        | 3.70E-01 | -2.70E+00 | -1.43 | 0.0010 | -8.36E+01 | 8.36E+01 |
| ENSMUSG00000045008 | 9030612E09Rik | 1.28E+01 | 1.28E+01  | 3.68  | 0.0238 | 8.33E+01  | 8.33E+01 |
| ENSMUSG00000106838 | RP24-556H22.2 | 7.60E+00 | 7.60E+00  | 2.93  | 0.0084 | 8.30E+01  | 8.30E+01 |
| ENSMUSG00000030895 | Hpx           | 2.28E+00 | 2.28E+00  | 1.19  | 0.0008 | 8.28E+01  | 8.28E+01 |
| ENSMUSG00000097610 | A930012L18Rik | 2.66E-01 | -3.76E+00 | -1.91 | 0.0021 | -8.23E+01 | 8.23E+01 |
| ENSMUSG00000086283 | 2810433D01Rik | 1.13E-01 | -8.85E+00 | -3.15 | 0.0116 | -8.22E+01 | 8.22E+01 |

|                    |               |          |           |       |        |           |          |
|--------------------|---------------|----------|-----------|-------|--------|-----------|----------|
| ENSMUSG00000076392 | Gm25992       | 1.93E-01 | -5.19E+00 | -2.38 | 0.0040 | -8.20E+01 | 8.20E+01 |
| ENSMUSG00000033578 | Tmem35        | 2.58E-01 | -3.88E+00 | -1.95 | 0.0023 | -8.13E+01 | 8.13E+01 |
| ENSMUSG00000004540 | Psg17         | 5.25E+00 | 5.25E+00  | 2.39  | 0.0042 | 8.11E+01  | 8.11E+01 |
| ENSMUSG00000092545 | Gm20319       | 3.91E+00 | 3.91E+00  | 1.97  | 0.0023 | 8.11E+01  | 8.11E+01 |
| ENSMUSG00000090643 | Gm3453        | 9.85E+00 | 9.85E+00  | 3.30  | 0.0148 | 8.11E+01  | 8.11E+01 |
| ENSMUSG00000085275 | Gm14487       | 5.03E+00 | 5.03E+00  | 2.33  | 0.0039 | 8.08E+01  | 8.08E+01 |
| ENSMUSG00000103642 | Gm37769       | 1.35E-01 | -7.43E+00 | -2.89 | 0.0085 | -8.08E+01 | 8.08E+01 |
| ENSMUSG00000079258 | Calhm1        | 9.85E+00 | 9.85E+00  | 3.30  | 0.0149 | 8.07E+01  | 8.07E+01 |
| ENSMUSG00000023094 | MsrB2         | 2.88E-01 | -3.47E+00 | -1.79 | 0.0019 | -8.05E+01 | 8.05E+01 |
| ENSMUSG00000000381 | Wap           | 1.14E+01 | 1.14E+01  | 3.51  | 0.0201 | 8.01E+01  | 8.01E+01 |
| ENSMUSG00000017754 | Pltp          | 2.82E-01 | -3.55E+00 | -1.83 | 0.0020 | -8.01E+01 | 8.01E+01 |
| ENSMUSG00000048752 | Prss50        | 6.13E+00 | 6.13E+00  | 2.62  | 0.0059 | 8.00E+01  | 8.00E+01 |
| ENSMUSG00000104507 | A430027H14Rik | 1.94E-01 | -5.17E+00 | -2.37 | 0.0042 | -7.99E+01 | 7.99E+01 |
| ENSMUSG00000049281 | Scn3b         | 3.25E-01 | -3.08E+00 | -1.62 | 0.0015 | -7.98E+01 | 7.98E+01 |
| ENSMUSG00000103043 | Gm37306       | 1.29E-01 | -7.77E+00 | -2.96 | 0.0095 | -7.97E+01 | 7.97E+01 |
| ENSMUSG00000024222 | Fkbp5         | 1.06E+01 | 1.06E+01  | 3.40  | 0.0177 | 7.96E+01  | 7.96E+01 |
| ENSMUSG00000100303 | 2600014E21Rik | 1.74E+01 | 1.74E+01  | 4.12  | 0.0480 | 7.95E+01  | 7.95E+01 |
| ENSMUSG00000084316 | Gm8668        | 8.24E-02 | -1.21E+01 | -3.60 | 0.0233 | -7.94E+01 | 7.94E+01 |
| ENSMUSG00000084890 | A830036E02Rik | 5.67E+00 | 5.67E+00  | 2.50  | 0.0052 | 7.89E+01  | 7.89E+01 |
| ENSMUSG00000020150 | Gamt          | 2.72E-01 | -3.67E+00 | -1.88 | 0.0022 | -7.88E+01 | 7.88E+01 |
| ENSMUSG00000079343 | C1s2          | 4.98E+00 | 4.98E+00  | 2.32  | 0.0040 | 7.88E+01  | 7.88E+01 |
| ENSMUSG00000060180 | Myh13         | 1.77E-01 | -5.64E+00 | -2.50 | 0.0052 | -7.86E+01 | 7.86E+01 |
| ENSMUSG00000098052 | Gm5300        | 1.27E+01 | 1.27E+01  | 3.67  | 0.0263 | 7.85E+01  | 7.85E+01 |
| ENSMUSG00000067702 | Tuba3a        | 1.66E+01 | 1.66E+01  | 4.06  | 0.0451 | 7.83E+01  | 7.83E+01 |
| ENSMUSG00000053199 | Arhgap20      | 2.93E-01 | -3.41E+00 | -1.77 | 0.0019 | -7.80E+01 | 7.80E+01 |
| ENSMUSG00000025380 | Fscn2         | 1.08E+01 | 1.08E+01  | 3.44  | 0.0195 | 7.76E+01  | 7.76E+01 |
| ENSMUSG00000086127 | Gm11934       | 1.11E+01 | 1.11E+01  | 3.47  | 0.0206 | 7.73E+01  | 7.73E+01 |
| ENSMUSG00000060187 | Lrrc10        | 4.74E-01 | -2.11E+00 | -1.08 | 0.0007 | -7.72E+01 | 7.72E+01 |
| ENSMUSG00000080993 | Gm12903       | 9.01E-02 | -1.11E+01 | -3.47 | 0.0208 | -7.70E+01 | 7.70E+01 |
| ENSMUSG00000092505 | Gm19246       | 1.96E-01 | -5.10E+00 | -2.35 | 0.0044 | -7.65E+01 | 7.65E+01 |
| ENSMUSG00000102652 | Gm37078       | 7.89E+00 | 7.89E+00  | 2.98  | 0.0107 | 7.65E+01  | 7.65E+01 |
| ENSMUSG00000054423 | Cadps         | 1.67E+01 | 1.67E+01  | 4.06  | 0.0478 | 7.62E+01  | 7.62E+01 |
| ENSMUSG00000029517 | Ankrd7        | 1.63E+01 | 1.63E+01  | 4.03  | 0.0462 | 7.59E+01  | 7.59E+01 |
| ENSMUSG00000099464 | Gm5260        | 2.24E-01 | -4.46E+00 | -2.16 | 0.0035 | -7.55E+01 | 7.55E+01 |
| ENSMUSG00000089730 | 1700007P06Rik | 9.07E-02 | -1.10E+01 | -3.46 | 0.0213 | -7.55E+01 | 7.55E+01 |
| ENSMUSG00000075023 | Accsl         | 1.64E+01 | 1.64E+01  | 4.04  | 0.0479 | 7.49E+01  | 7.49E+01 |
| ENSMUSG00000085276 | Gm15812       | 4.03E-01 | -2.48E+00 | -1.31 | 0.0011 | -7.48E+01 | 7.48E+01 |
| ENSMUSG00000055489 | Ano5          | 1.61E-01 | -6.19E+00 | -2.63 | 0.0069 | -7.47E+01 | 7.47E+01 |
| ENSMUSG00000041479 | Syt15         | 2.08E-01 | -4.80E+00 | -2.26 | 0.0042 | -7.42E+01 | 7.42E+01 |
| ENSMUSG00000084826 | Al847159      | 4.36E+00 | 4.36E+00  | 2.13  | 0.0035 | 7.42E+01  | 7.42E+01 |
| ENSMUSG00000026109 | Tmeff2        | 2.91E-01 | -3.44E+00 | -1.78 | 0.0021 | -7.42E+01 | 7.42E+01 |
| ENSMUSG00000090222 | Gm16340       | 9.21E-02 | -1.09E+01 | -3.44 | 0.0214 | -7.42E+01 | 7.42E+01 |
| ENSMUSG00000103040 | Gm37304       | 9.06E-02 | -1.10E+01 | -3.46 | 0.0222 | -7.41E+01 | 7.41E+01 |
| ENSMUSG00000039691 | Tspan10       | 9.84E+00 | 9.84E+00  | 3.30  | 0.0177 | 7.41E+01  | 7.41E+01 |
| ENSMUSG00000040891 | Foxa3         | 4.43E+00 | 4.43E+00  | 2.15  | 0.0036 | 7.38E+01  | 7.38E+01 |
| ENSMUSG00000023951 | Vegfa         | 3.53E-01 | -2.83E+00 | -1.50 | 0.0015 | -7.38E+01 | 7.38E+01 |
| ENSMUSG00000073094 | Smim9         | 1.21E+01 | 1.21E+01  | 3.59  | 0.0270 | 7.35E+01  | 7.35E+01 |
| ENSMUSG00000066687 | Zbtb16        | 3.44E+00 | 3.44E+00  | 1.78  | 0.0022 | 7.33E+01  | 7.33E+01 |
| ENSMUSG00000049796 | Crh           | 5.08E+00 | 5.08E+00  | 2.35  | 0.0048 | 7.32E+01  | 7.32E+01 |
| ENSMUSG00000020286 | 1700093K21Rik | 1.63E+01 | 1.63E+01  | 4.03  | 0.0499 | 7.30E+01  | 7.30E+01 |
| ENSMUSG00000070687 | Htr1d         | 1.21E+01 | 1.21E+01  | 3.60  | 0.0276 | 7.28E+01  | 7.28E+01 |
| ENSMUSG00000020469 | Myl7          | 2.96E-01 | -3.38E+00 | -1.76 | 0.0022 | -7.28E+01 | 7.28E+01 |
| ENSMUSG00000104708 | RP23-151C5.3  | 8.91E+00 | 8.91E+00  | 3.15  | 0.0151 | 7.24E+01  | 7.24E+01 |
| ENSMUSG00000105873 | RP23-49G7.2   | 1.41E-01 | -7.11E+00 | -2.83 | 0.0097 | -7.23E+01 | 7.23E+01 |
| ENSMUSG00000047161 | Chst9         | 1.37E-01 | -7.30E+00 | -2.87 | 0.0103 | -7.21E+01 | 7.21E+01 |
| ENSMUSG00000056032 | BC018473      | 1.59E+01 | 1.59E+01  | 3.99  | 0.0492 | 7.17E+01  | 7.17E+01 |
| ENSMUSG00000078117 | Gm16485       | 2.55E-01 | -3.92E+00 | -1.97 | 0.0030 | -7.15E+01 | 7.15E+01 |
| ENSMUSG00000063727 | Tnfrsf11b     | 2.44E-01 | -4.10E+00 | -2.04 | 0.0033 | -7.14E+01 | 7.14E+01 |
| ENSMUSG00000081909 | Gm11341       | 1.54E+01 | 1.54E+01  | 3.95  | 0.0471 | 7.11E+01  | 7.11E+01 |
| ENSMUSG00000064194 | Zfp936        | 1.54E+01 | 1.54E+01  | 3.95  | 0.0471 | 7.11E+01  | 7.11E+01 |
| ENSMUSG00000087589 | D430040D24Rik | 3.41E+00 | 3.41E+00  | 1.77  | 0.0023 | 7.10E+01  | 7.10E+01 |
| ENSMUSG00000092183 | 4930515G01Rik | 7.61E+00 | 7.61E+00  | 2.93  | 0.0115 | 7.09E+01  | 7.09E+01 |
| ENSMUSG00000041567 | Serpina12     | 1.32E-01 | -7.57E+00 | -2.92 | 0.0114 | -7.08E+01 | 7.08E+01 |
| ENSMUSG00000079555 | Haus3         | 2.48E+00 | 2.48E+00  | 1.31  | 0.0012 | 7.06E+01  | 7.06E+01 |
| ENSMUSG00000009281 | Rarres2       | 3.92E-01 | -2.55E+00 | -1.35 | 0.0013 | -7.05E+01 | 7.05E+01 |
| ENSMUSG00000106583 | RP24-182A8.1  | 1.50E-01 | -6.69E+00 | -2.74 | 0.0090 | -7.04E+01 | 7.04E+01 |
| ENSMUSG00000102322 | 4930566N20Rik | 1.34E-01 | -7.49E+00 | -2.91 | 0.0115 | -6.99E+01 | 6.99E+01 |

|                     |               |          |           |       |        |           |          |
|---------------------|---------------|----------|-----------|-------|--------|-----------|----------|
| ENSMUSG00000084686  | Gm22027       | 1.01E-01 | -9.90E+00 | -3.31 | 0.0204 | -6.93E+01 | 6.93E+01 |
| ENSMUSG00000007279  | Scube2        | 2.18E-01 | -4.59E+00 | -2.20 | 0.0044 | -6.92E+01 | 6.92E+01 |
| ENSMUSG00000001827  | Folr1         | 5.98E+00 | 5.98E+00  | 2.58  | 0.0075 | 6.91E+01  | 6.91E+01 |
| ENSMUSG00000038994  | Hils1         | 1.39E+01 | 1.39E+01  | 3.80  | 0.0407 | 6.89E+01  | 6.89E+01 |
| ENSMUSG00000097165  | 2210008F06Rik | 9.09E+00 | 9.09E+00  | 3.18  | 0.0174 | 6.88E+01  | 6.88E+01 |
| ENSMUSG00000078670  | Fam174b       | 4.03E-01 | -2.48E+00 | -1.31 | 0.0013 | -6.85E+01 | 6.85E+01 |
| ENSMUSG00000059411  | Olfr434       | 9.21E+00 | 9.21E+00  | 3.20  | 0.0181 | 6.85E+01  | 6.85E+01 |
| ENSMUSG00000035283  | Adrb1         | 3.68E-01 | -2.72E+00 | -1.44 | 0.0016 | -6.85E+01 | 6.85E+01 |
| ENSMUSG00000083518  | Gm9429        | 7.35E+00 | 7.35E+00  | 2.88  | 0.0115 | 6.84E+01  | 6.84E+01 |
| ENSMUSG00000097015  | Gm26705       | 1.83E-01 | -5.45E+00 | -2.45 | 0.0064 | -6.83E+01 | 6.83E+01 |
| ENSMUSG00000030523  | Trpm1         | 7.91E+00 | 7.91E+00  | 2.98  | 0.0134 | 6.82E+01  | 6.82E+01 |
| ENSMUSG00000052934  | Fbxo31        | 2.14E+00 | 2.14E+00  | 1.10  | 0.0010 | 6.81E+01  | 6.81E+01 |
| ENSMUSG00000097465  | Gm16619       | 3.71E+00 | 3.71E+00  | 1.89  | 0.0030 | 6.80E+01  | 6.80E+01 |
| ENSMUSG00000105402  | RP24-448C16.7 | 2.20E-01 | -4.54E+00 | -2.18 | 0.0045 | -6.78E+01 | 6.78E+01 |
| ENSMUSG00000107045  | RP23-387P23.4 | 6.60E+00 | 6.60E+00  | 2.72  | 0.0095 | 6.77E+01  | 6.77E+01 |
| ENSMUSG00000069890  | 1700024J04Rik | 5.03E+00 | 5.03E+00  | 2.33  | 0.0056 | 6.72E+01  | 6.72E+01 |
| ENSMUSG00000097766  | 5730420D15Rik | 2.27E+00 | 2.27E+00  | 1.18  | 0.0011 | 6.72E+01  | 6.72E+01 |
| ENSMUSG00000056155  | Nanos3        | 1.15E+01 | 1.15E+01  | 3.53  | 0.0295 | 6.71E+01  | 6.71E+01 |
| ENSMUSG00000075427  | Olfr288       | 1.07E+01 | 1.07E+01  | 3.42  | 0.0256 | 6.67E+01  | 6.67E+01 |
| ENSMUSG00000103012  | Gm37548       | 1.10E-01 | -9.12E+00 | -3.19 | 0.0187 | -6.67E+01 | 6.67E+01 |
| ENSMUSG00000106247  | Gpc2          | 4.91E+00 | 4.91E+00  | 2.30  | 0.0054 | 6.66E+01  | 6.66E+01 |
| ENSMUSG00000070504  | Fcrl6         | 4.72E+00 | 4.72E+00  | 2.24  | 0.0050 | 6.65E+01  | 6.65E+01 |
| ENSMUSG00000021509  | Slc25a48      | 1.42E+01 | 1.42E+01  | 3.83  | 0.0457 | 6.65E+01  | 6.65E+01 |
| ENSMUSG00000087202  | Gm15813       | 4.07E-01 | -2.46E+00 | -1.30 | 0.0014 | -6.64E+01 | 6.64E+01 |
| ENSMUSG00000106840  | Wl1-535J9.1   | 5.84E+00 | 5.84E+00  | 2.55  | 0.0077 | 6.63E+01  | 6.63E+01 |
| ENSMUSG00000091511  | Vmn2r87       | 1.31E-01 | -7.62E+00 | -2.93 | 0.0133 | -6.61E+01 | 6.61E+01 |
| ENSMUSG00000048814  | Lonrf2        | 2.62E-01 | -3.82E+00 | -1.93 | 0.0034 | -6.59E+01 | 6.59E+01 |
| ENSMUSG00000083289  | Gm8812        | 2.57E+00 | 2.57E+00  | 1.36  | 0.0015 | 6.58E+01  | 6.58E+01 |
| ENSMUSG00000100510  | AV026068      | 2.04E-01 | -4.90E+00 | -2.29 | 0.0055 | -6.57E+01 | 6.57E+01 |
| ENSMUSG00000048582  | Gja3          | 1.35E-01 | -7.41E+00 | -2.89 | 0.0127 | -6.57E+01 | 6.57E+01 |
| ENSMUSG00000020642  | Rnf144a       | 2.44E-01 | -4.10E+00 | -2.04 | 0.0039 | -6.56E+01 | 6.56E+01 |
| ENSMUSG00000098575  | Gm27446       | 2.00E-01 | -4.99E+00 | -2.32 | 0.0058 | -6.55E+01 | 6.55E+01 |
| ENSMUSG00000011751  | Sptbn4        | 7.09E+00 | 7.09E+00  | 2.82  | 0.0117 | 6.54E+01  | 6.54E+01 |
| ENSMUSG00000036158  | Prickle1      | 3.00E-01 | -3.34E+00 | -1.74 | 0.0026 | -6.54E+01 | 6.54E+01 |
| ENSMUSG000000087452 | Gm11998       | 1.42E-01 | -7.05E+00 | -2.82 | 0.0117 | -6.52E+01 | 6.52E+01 |
| ENSMUSG00000097360  | 9430065F17Rik | 1.89E-01 | -5.29E+00 | -2.40 | 0.0066 | -6.52E+01 | 6.52E+01 |
| ENSMUSG00000044320  | 1700001O22Rik | 2.82E+00 | 2.82E+00  | 1.50  | 0.0019 | 6.50E+01  | 6.50E+01 |
| ENSMUSG00000023914  | Mep1a         | 1.30E+01 | 1.30E+01  | 3.70  | 0.0402 | 6.46E+01  | 6.46E+01 |
| ENSMUSG00000028718  | Stil          | 3.82E+00 | 3.82E+00  | 1.93  | 0.0035 | 6.42E+01  | 6.42E+01 |
| ENSMUSG00000105391  | RP23-298M23.3 | 4.00E+00 | 4.00E+00  | 2.00  | 0.0039 | 6.36E+01  | 6.36E+01 |
| ENSMUSG00000016262  | Sertad4       | 3.45E-01 | -2.90E+00 | -1.53 | 0.0021 | -6.34E+01 | 6.34E+01 |
| ENSMUSG00000051788  | 4930564D02Rik | 1.37E+01 | 1.37E+01  | 3.78  | 0.0471 | 6.32E+01  | 6.32E+01 |
| ENSMUSG00000084061  | Gm4996        | 7.40E-02 | -1.35E+01 | -3.76 | 0.0458 | -6.31E+01 | 6.31E+01 |
| ENSMUSG00000106220  | RP24-488I7.1  | 2.70E-01 | -3.70E+00 | -1.89 | 0.0035 | -6.28E+01 | 6.28E+01 |
| ENSMUSG000000086947 | 4930522O17Rik | 1.30E-01 | -7.70E+00 | -2.94 | 0.0151 | -6.27E+01 | 6.27E+01 |
| ENSMUSG00000016552  | Foxred2       | 3.32E+00 | 3.32E+00  | 1.73  | 0.0028 | 6.26E+01  | 6.26E+01 |
| ENSMUSG00000076431  | Sox4          | 3.80E-01 | -2.63E+00 | -1.39 | 0.0018 | -6.23E+01 | 6.23E+01 |
| ENSMUSG00000101476  | Gm29570       | 8.38E+00 | 8.38E+00  | 3.07  | 0.0184 | 6.19E+01  | 6.19E+01 |
| ENSMUSG00000029695  | Aass          | 2.22E-01 | -4.50E+00 | -2.17 | 0.0053 | -6.18E+01 | 6.18E+01 |
| ENSMUSG00000015665  | Awat1         | 8.47E+00 | 8.47E+00  | 3.08  | 0.0188 | 6.18E+01  | 6.18E+01 |
| ENSMUSG00000074217  | 2210011C24Rik | 3.18E-01 | -3.14E+00 | -1.65 | 0.0026 | -6.17E+01 | 6.17E+01 |
| ENSMUSG00000029669  | Tspan12       | 3.69E-01 | -2.71E+00 | -1.44 | 0.0019 | -6.17E+01 | 6.17E+01 |
| ENSMUSG00000089352  | Gm25489       | 1.48E-01 | -6.75E+00 | -2.76 | 0.0120 | -6.17E+01 | 6.17E+01 |
| ENSMUSG00000091457  | Gm17171       | 2.11E-01 | -4.73E+00 | -2.24 | 0.0059 | -6.17E+01 | 6.17E+01 |
| ENSMUSG00000054422  | Fabp1         | 1.62E-01 | -6.17E+00 | -2.63 | 0.0100 | -6.17E+01 | 6.17E+01 |
| ENSMUSG00000020916  | Krt36         | 1.48E-01 | -6.76E+00 | -2.76 | 0.0120 | -6.16E+01 | 6.16E+01 |
| ENSMUSG00000024440  | Pcdh12        | 2.47E-01 | -4.04E+00 | -2.02 | 0.0044 | -6.12E+01 | 6.12E+01 |
| ENSMUSG00000041708  | Mpped1        | 3.34E+00 | 3.34E+00  | 1.74  | 0.0030 | 6.11E+01  | 6.11E+01 |
| ENSMUSG00000067949  | Vmn1r-ps144   | 8.53E+00 | 8.53E+00  | 3.09  | 0.0197 | 6.08E+01  | 6.08E+01 |
| ENSMUSG00000015354  | Pcolce2       | 3.20E-01 | -3.12E+00 | -1.64 | 0.0026 | -6.07E+01 | 6.07E+01 |
| ENSMUSG00000044624  | Gm4922        | 2.11E-01 | -4.73E+00 | -2.24 | 0.0061 | -6.06E+01 | 6.06E+01 |
| ENSMUSG00000061974  | Cldn24        | 8.33E+00 | 8.33E+00  | 3.06  | 0.0190 | 6.05E+01  | 6.05E+01 |
| ENSMUSG00000055333  | Fat2          | 3.13E-01 | -3.20E+00 | -1.68 | 0.0028 | -6.04E+01 | 6.04E+01 |
| ENSMUSG00000104519  | Gm37161       | 2.70E-01 | -3.70E+00 | -1.89 | 0.0038 | -6.01E+01 | 6.01E+01 |
| ENSMUSG00000007944  | Ttc9b         | 6.70E+00 | 6.70E+00  | 2.74  | 0.0124 | 6.00E+01  | 6.00E+01 |
| ENSMUSG00000054196  | Cthrc1        | 2.33E-01 | -4.29E+00 | -2.10 | 0.0051 | -5.98E+01 | 5.98E+01 |
| ENSMUSG00000092171  | 4833427F10Rik | 3.67E+00 | 3.67E+00  | 1.87  | 0.0038 | 5.97E+01  | 5.97E+01 |

|                    |               |          |           |       |        |           |          |
|--------------------|---------------|----------|-----------|-------|--------|-----------|----------|
| ENSMUSG00000053441 | Adamts19      | 2.00E-01 | -5.00E+00 | -2.32 | 0.0071 | -5.95E+01 | 5.95E+01 |
| ENSMUSG00000101505 | 1700109G14Rik | 6.11E+00 | 6.11E+00  | 2.61  | 0.0106 | 5.94E+01  | 5.94E+01 |
| ENSMUSG00000088171 | Gm25220       | 1.47E-01 | -6.78E+00 | -2.76 | 0.0132 | -5.91E+01 | 5.91E+01 |
| ENSMUSG00000098130 | Gm17797       | 2.85E-01 | -3.51E+00 | -1.81 | 0.0035 | -5.90E+01 | 5.90E+01 |
| ENSMUSG00000038233 | Fam198a       | 2.03E-01 | -4.93E+00 | -2.30 | 0.0070 | -5.90E+01 | 5.90E+01 |
| ENSMUSG00000104882 | RP23-397C5.5  | 4.72E-01 | -2.12E+00 | -1.08 | 0.0013 | -5.90E+01 | 5.90E+01 |
| ENSMUSG00000081106 | Gm7155        | 1.27E-01 | -7.88E+00 | -2.98 | 0.0179 | -5.89E+01 | 5.89E+01 |
| ENSMUSG00000027209 | Fam227b       | 2.58E+00 | 2.58E+00  | 1.37  | 0.0019 | 5.88E+01  | 5.88E+01 |
| ENSMUSG00000075480 | Gm10840       | 8.80E+00 | 8.80E+00  | 3.14  | 0.0225 | 5.86E+01  | 5.86E+01 |
| ENSMUSG00000036574 | 1700019O17Rik | 4.68E+00 | 4.68E+00  | 2.23  | 0.0064 | 5.86E+01  | 5.86E+01 |
| ENSMUSG00000028794 | A3galt2       | 6.05E+00 | 6.05E+00  | 2.60  | 0.0107 | 5.85E+01  | 5.85E+01 |
| ENSMUSG00000097847 | 4930478K11Rik | 5.03E+00 | 5.03E+00  | 2.33  | 0.0074 | 5.85E+01  | 5.85E+01 |
| ENSMUSG00000063060 | Sox7          | 2.99E-01 | -3.35E+00 | -1.74 | 0.0033 | -5.81E+01 | 5.81E+01 |
| ENSMUSG00000026616 | Cr2           | 4.36E-01 | -2.30E+00 | -1.20 | 0.0016 | -5.81E+01 | 5.81E+01 |
| ENSMUSG00000086405 | 9330198N18Rik | 7.88E+00 | 7.88E+00  | 2.98  | 0.0187 | 5.77E+01  | 5.77E+01 |
| ENSMUSG00000103061 | Gm36970       | 1.36E-01 | -7.35E+00 | -2.88 | 0.0162 | -5.77E+01 | 5.77E+01 |
| ENSMUSG00000039178 | Tbc1d19       | 4.72E-01 | -2.12E+00 | -1.08 | 0.0014 | -5.74E+01 | 5.74E+01 |
| ENSMUSG00000081636 | Gm15901       | 1.46E-01 | -6.87E+00 | -2.78 | 0.0143 | -5.74E+01 | 5.74E+01 |
| ENSMUSG00000031881 | Cdh16         | 2.93E-01 | -3.41E+00 | -1.77 | 0.0036 | -5.71E+01 | 5.71E+01 |
| ENSMUSG00000082767 | Gm11622       | 1.06E+01 | 1.06E+01  | 3.41  | 0.0351 | 5.66E+01  | 5.66E+01 |
| ENSMUSG00000097292 | A230107N01Rik | 1.74E-01 | -5.74E+00 | -2.52 | 0.0103 | -5.65E+01 | 5.65E+01 |
| ENSMUSG00000033350 | Chst2         | 3.38E-01 | -2.96E+00 | -1.57 | 0.0028 | -5.62E+01 | 5.62E+01 |
| ENSMUSG00000035576 | L3mbtl1       | 7.78E+00 | 7.78E+00  | 2.96  | 0.0193 | 5.61E+01  | 5.61E+01 |
| ENSMUSG00000055555 | 4930502E18Rik | 2.23E-01 | -4.48E+00 | -2.16 | 0.0064 | -5.60E+01 | 5.60E+01 |
| ENSMUSG00000085843 | Kank4os       | 1.71E-01 | -5.83E+00 | -2.54 | 0.0109 | -5.59E+01 | 5.59E+01 |
| ENSMUSG00000107252 | RP24-183G19.6 | 5.45E+00 | 5.45E+00  | 2.45  | 0.0096 | 5.57E+01  | 5.57E+01 |
| ENSMUSG00000105251 | RP23-195B3.3  | 1.13E+01 | 1.13E+01  | 3.50  | 0.0414 | 5.57E+01  | 5.57E+01 |
| ENSMUSG00000103015 | Gm37549       | 3.92E+00 | 3.92E+00  | 1.97  | 0.0051 | 5.51E+01  | 5.51E+01 |
| ENSMUSG00000068745 | Mybphl        | 1.52E-01 | -6.57E+00 | -2.72 | 0.0145 | -5.46E+01 | 5.46E+01 |
| ENSMUSG00000043289 | Mei4          | 1.55E-01 | -6.46E+00 | -2.69 | 0.0142 | -5.42E+01 | 5.42E+01 |
| ENSMUSG00000045545 | Krt14         | 1.46E-01 | -6.84E+00 | -2.77 | 0.0160 | -5.41E+01 | 5.41E+01 |
| ENSMUSG00000105203 | RP24-255E8.1  | 4.35E+00 | 4.35E+00  | 2.12  | 0.0065 | 5.39E+01  | 5.39E+01 |
| ENSMUSG00000099192 | Gm27373       | 1.13E-01 | -8.87E+00 | -3.15 | 0.0272 | -5.38E+01 | 5.38E+01 |
| ENSMUSG00000053030 | Spink2        | 2.96E-01 | -3.38E+00 | -1.76 | 0.0040 | -5.38E+01 | 5.38E+01 |
| ENSMUSG00000086265 | Marcks1-ps4   | 2.14E-01 | -4.67E+00 | -2.22 | 0.0075 | -5.38E+01 | 5.38E+01 |
| ENSMUSG00000073293 | Nudt10        | 3.79E-01 | -2.64E+00 | -1.40 | 0.0024 | -5.38E+01 | 5.38E+01 |
| ENSMUSG00000058806 | Col13a1       | 4.96E-01 | -2.02E+00 | -1.01 | 0.0014 | -5.37E+01 | 5.37E+01 |
| ENSMUSG00000000416 | Cttnbp2       | 2.32E-01 | -4.30E+00 | -2.11 | 0.0065 | -5.36E+01 | 5.36E+01 |
| ENSMUSG00000102207 | Gm10344       | 7.80E+00 | 7.80E+00  | 2.96  | 0.0212 | 5.36E+01  | 5.36E+01 |
| ENSMUSG00000046491 | C1qtnf2       | 2.47E-01 | -4.04E+00 | -2.02 | 0.0057 | -5.34E+01 | 5.34E+01 |
| ENSMUSG00000029636 | Wasf3         | 4.56E-01 | -2.19E+00 | -1.13 | 0.0017 | -5.34E+01 | 5.34E+01 |
| ENSMUSG00000054690 | Emcn          | 3.13E-01 | -3.19E+00 | -1.68 | 0.0036 | -5.34E+01 | 5.34E+01 |
| ENSMUSG00000073295 | Nudt11        | 4.54E-01 | -2.20E+00 | -1.14 | 0.0017 | -5.30E+01 | 5.30E+01 |
| ENSMUSG00000074218 | Cox7a1        | 4.10E-01 | -2.44E+00 | -1.29 | 0.0021 | -5.30E+01 | 5.30E+01 |
| ENSMUSG00000027597 | Ahcy          | 2.32E+00 | 2.32E+00  | 1.21  | 0.0019 | 5.27E+01  | 5.27E+01 |
| ENSMUSG00000086791 | Gm12147       | 1.05E+01 | 1.05E+01  | 3.40  | 0.0400 | 5.27E+01  | 5.27E+01 |
| ENSMUSG00000037492 | Zmat4         | 1.38E-01 | -7.27E+00 | -2.86 | 0.0195 | -5.21E+01 | 5.21E+01 |
| ENSMUSG00000105212 | RP23-286C5.2  | 2.78E-01 | -3.59E+00 | -1.84 | 0.0048 | -5.21E+01 | 5.21E+01 |
| ENSMUSG00000046793 | Gpr61         | 4.95E+00 | 4.95E+00  | 2.31  | 0.0091 | 5.19E+01  | 5.19E+01 |
| ENSMUSG00000036144 | Meox2         | 2.64E-01 | -3.79E+00 | -1.92 | 0.0054 | -5.16E+01 | 5.16E+01 |
| ENSMUSG00000019831 | Wasf1         | 1.58E-01 | -6.35E+00 | -2.67 | 0.0151 | -5.16E+01 | 5.16E+01 |
| ENSMUSG00000028011 | Tdo2          | 3.97E+00 | 3.97E+00  | 1.99  | 0.0059 | 5.15E+01  | 5.15E+01 |
| ENSMUSG00000089874 | 9230117E06Rik | 2.55E-01 | -3.92E+00 | -1.97 | 0.0058 | -5.14E+01 | 5.14E+01 |
| ENSMUSG00000039304 | Tnfsf10       | 2.35E-01 | -4.25E+00 | -2.09 | 0.0069 | -5.13E+01 | 5.13E+01 |
| ENSMUSG00000027612 | Mmp24         | 5.18E+00 | 5.18E+00  | 2.37  | 0.0102 | 5.13E+01  | 5.13E+01 |
| ENSMUSG00000105130 | RP23-434H17.5 | 2.49E+00 | 2.49E+00  | 1.31  | 0.0024 | 5.11E+01  | 5.11E+01 |
| ENSMUSG00000100318 | Gm18799       | 1.10E-01 | -9.08E+00 | -3.18 | 0.0315 | -5.11E+01 | 5.11E+01 |
| ENSMUSG00000001802 | Lrp3          | 3.19E-01 | -3.13E+00 | -1.65 | 0.0038 | -5.10E+01 | 5.10E+01 |
| ENSMUSG00000091014 | Gm5244        | 1.01E+01 | 1.01E+01  | 3.33  | 0.0394 | 5.09E+01  | 5.09E+01 |
| ENSMUSG00000086765 | Gm11827       | 7.39E+00 | 7.39E+00  | 2.89  | 0.0211 | 5.08E+01  | 5.08E+01 |
| ENSMUSG00000089635 | Gm16559       | 2.87E-01 | -3.48E+00 | -1.80 | 0.0047 | -5.08E+01 | 5.08E+01 |
| ENSMUSG00000020877 | Scrn2         | 3.31E-01 | -3.02E+00 | -1.59 | 0.0035 | -5.08E+01 | 5.08E+01 |
| ENSMUSG00000107281 | AC113302.1    | 7.33E+00 | 7.33E+00  | 2.87  | 0.0210 | 5.05E+01  | 5.05E+01 |
| ENSMUSG00000099422 | Gm4275        | 9.93E+00 | 9.93E+00  | 3.31  | 0.0388 | 5.04E+01  | 5.04E+01 |
| ENSMUSG00000097789 | Gm2115        | 3.62E-01 | -2.76E+00 | -1.47 | 0.0030 | -5.03E+01 | 5.03E+01 |
| ENSMUSG00000023336 | Wfdc1         | 3.79E-01 | -2.64E+00 | -1.40 | 0.0028 | -5.03E+01 | 5.03E+01 |
| ENSMUSG00000060548 | Tnfrsf19      | 3.23E-01 | -3.10E+00 | -1.63 | 0.0038 | -5.03E+01 | 5.03E+01 |

|                    |               |          |           |       |        |           |          |
|--------------------|---------------|----------|-----------|-------|--------|-----------|----------|
| ENSMUSG00000085329 | 2810404F17Rik | 1.04E+01 | 1.04E+01  | 3.38  | 0.0429 | 5.02E+01  | 5.02E+01 |
| ENSMUSG00000105401 | RP23-239A13.2 | 7.57E+00 | 7.57E+00  | 2.92  | 0.0228 | 5.01E+01  | 5.01E+01 |
| ENSMUSG00000038583 | Pln           | 3.65E-01 | -2.74E+00 | -1.45 | 0.0030 | -5.00E+01 | 5.00E+01 |
| ENSMUSG00000085982 | 9530051G07Rik | 1.72E-01 | -5.81E+00 | -2.54 | 0.0135 | -4.99E+01 | 4.99E+01 |
| ENSMUSG00000084595 | n-R5s188      | 2.00E-01 | -5.01E+00 | -2.32 | 0.0101 | -4.98E+01 | 4.98E+01 |
| ENSMUSG00000033006 | Sox10         | 3.17E+00 | 3.17E+00  | 1.66  | 0.0040 | 4.98E+01  | 4.98E+01 |
| ENSMUSG00000071317 | Bves          | 2.73E-01 | -3.66E+00 | -1.87 | 0.0054 | -4.98E+01 | 4.98E+01 |
| ENSMUSG00000025856 | Pdgfa         | 4.32E-01 | -2.32E+00 | -1.21 | 0.0022 | -4.98E+01 | 4.98E+01 |
| ENSMUSG00000084674 | Gm26027       | 2.92E-01 | -3.42E+00 | -1.78 | 0.0047 | -4.97E+01 | 4.97E+01 |
| ENSMUSG00000031841 | Cdh13         | 4.15E-01 | -2.41E+00 | -1.27 | 0.0024 | -4.96E+01 | 4.96E+01 |
| ENSMUSG00000097050 | Gm9918        | 6.06E+00 | 6.06E+00  | 2.60  | 0.0150 | 4.95E+01  | 4.95E+01 |
| ENSMUSG00000074467 | Gm10702       | 4.16E+00 | 4.16E+00  | 2.06  | 0.0071 | 4.94E+01  | 4.94E+01 |
| ENSMUSG00000087192 | 4930412L05Rik | 9.13E+00 | 9.13E+00  | 3.19  | 0.0341 | 4.94E+01  | 4.94E+01 |
| ENSMUSG00000082800 | Gm13560       | 1.06E-01 | -9.46E+00 | -3.24 | 0.0367 | -4.94E+01 | 4.94E+01 |
| ENSMUSG00000081957 | Ak3l2-ps      | 3.29E+00 | 3.29E+00  | 1.72  | 0.0044 | 4.94E+01  | 4.94E+01 |
| ENSMUSG00000028047 | Thbs3         | 3.33E-01 | -3.00E+00 | -1.59 | 0.0037 | -4.93E+01 | 4.93E+01 |
| ENSMUSG00000059921 | Unc5c         | 4.03E-01 | -2.48E+00 | -1.31 | 0.0026 | -4.91E+01 | 4.91E+01 |
| ENSMUSG00000098153 | Gm27024       | 6.57E+00 | 6.57E+00  | 2.72  | 0.0180 | 4.89E+01  | 4.89E+01 |
| ENSMUSG00000086666 | Gm12249       | 9.94E+00 | 9.94E+00  | 3.31  | 0.0417 | 4.87E+01  | 4.87E+01 |
| ENSMUSG00000011632 | Pinlyp        | 9.94E+00 | 9.94E+00  | 3.31  | 0.0417 | 4.87E+01  | 4.87E+01 |
| ENSMUSG00000010342 | Tex14         | 3.59E+00 | 3.59E+00  | 1.84  | 0.0055 | 4.85E+01  | 4.85E+01 |
| ENSMUSG00000038295 | Atg9b         | 9.40E+00 | 9.40E+00  | 3.23  | 0.0377 | 4.84E+01  | 4.84E+01 |
| ENSMUSG00000054409 | Tmem74        | 9.58E-02 | -1.04E+01 | -3.38 | 0.0466 | -4.84E+01 | 4.84E+01 |
| ENSMUSG00000100782 | Gm28231       | 1.37E-01 | -7.32E+00 | -2.87 | 0.0230 | -4.83E+01 | 4.83E+01 |
| ENSMUSG00000058656 | Samd12        | 1.74E-01 | -5.76E+00 | -2.53 | 0.0142 | -4.83E+01 | 4.83E+01 |
| ENSMUSG00000033278 | Ptpm          | 4.80E-01 | -2.08E+00 | -1.06 | 0.0019 | -4.82E+01 | 4.82E+01 |
| ENSMUSG00000048385 | Scrt1         | 1.05E+01 | 1.05E+01  | 3.39  | 0.0472 | 4.82E+01  | 4.82E+01 |
| ENSMUSG00000051504 | Siglech       | 2.29E-01 | -4.37E+00 | -2.13 | 0.0083 | -4.81E+01 | 4.81E+01 |
| ENSMUSG00000097403 | 9230116N13Rik | 2.19E+00 | 2.19E+00  | 1.13  | 0.0021 | 4.80E+01  | 4.80E+01 |
| ENSMUSG00000032099 | Pate4         | 1.07E+01 | 1.07E+01  | 3.41  | 0.0497 | 4.78E+01  | 4.78E+01 |
| ENSMUSG00000040432 | Ltb4r2        | 1.03E+01 | 1.03E+01  | 3.37  | 0.0467 | 4.77E+01  | 4.77E+01 |
| ENSMUSG00000029735 | Tpk1          | 4.89E-01 | -2.04E+00 | -1.03 | 0.0018 | -4.76E+01 | 4.76E+01 |
| ENSMUSG00000050395 | Tnfsf15       | 3.05E-01 | -3.27E+00 | -1.71 | 0.0047 | -4.75E+01 | 4.75E+01 |
| ENSMUSG00000097087 | Gm26878       | 3.42E-01 | -2.93E+00 | -1.55 | 0.0038 | -4.75E+01 | 4.75E+01 |
| ENSMUSG00000056148 | Rdh9          | 5.71E+00 | 5.71E+00  | 2.51  | 0.0146 | 4.72E+01  | 4.72E+01 |
| ENSMUSG00000032128 | Robo3         | 4.45E+00 | 4.45E+00  | 2.16  | 0.0089 | 4.71E+01  | 4.71E+01 |
| ENSMUSG00000104765 | RP23-443N7.10 | 3.11E+00 | 3.11E+00  | 1.64  | 0.0044 | 4.71E+01  | 4.71E+01 |
| ENSMUSG00000028217 | Cdh17         | 2.81E+00 | 2.81E+00  | 1.49  | 0.0036 | 4.70E+01  | 4.70E+01 |
| ENSMUSG00000028972 | Car6          | 8.78E+00 | 8.78E+00  | 3.13  | 0.0350 | 4.69E+01  | 4.69E+01 |
| ENSMUSG00000106032 | RP23-298M23.7 | 2.99E-01 | -3.34E+00 | -1.74 | 0.0051 | -4.69E+01 | 4.69E+01 |
| ENSMUSG00000045680 | Tcf21         | 3.18E-01 | -3.15E+00 | -1.65 | 0.0045 | -4.67E+01 | 4.67E+01 |
| ENSMUSG00000068154 | Insm1         | 7.34E+00 | 7.34E+00  | 2.88  | 0.0248 | 4.66E+01  | 4.66E+01 |
| ENSMUSG00000084789 | Gm12974       | 5.97E+00 | 5.97E+00  | 2.58  | 0.0165 | 4.65E+01  | 4.65E+01 |
| ENSMUSG00000090843 | Gm17673       | 4.97E+00 | 4.97E+00  | 2.31  | 0.0114 | 4.65E+01  | 4.65E+01 |
| ENSMUSG00000057337 | Chst3         | 3.63E-01 | -2.75E+00 | -1.46 | 0.0035 | -4.64E+01 | 4.64E+01 |
| ENSMUSG00000085434 | Gm11725       | 4.77E+00 | 4.77E+00  | 2.25  | 0.0106 | 4.62E+01  | 4.62E+01 |
| ENSMUSG00000106444 | RP23-247I11.7 | 2.29E-01 | -4.36E+00 | -2.12 | 0.0089 | -4.62E+01 | 4.62E+01 |
| ENSMUSG00000093650 | Gm20631       | 2.07E-01 | -4.83E+00 | -2.27 | 0.0110 | -4.61E+01 | 4.61E+01 |
| ENSMUSG00000019865 | Nmbr          | 1.64E-01 | -6.11E+00 | -2.61 | 0.0176 | -4.61E+01 | 4.61E+01 |
| ENSMUSG00000091618 | H60c          | 1.93E-01 | -5.18E+00 | -2.37 | 0.0126 | -4.61E+01 | 4.61E+01 |
| ENSMUSG00000036782 | Klhl13        | 3.88E-01 | -2.58E+00 | -1.37 | 0.0031 | -4.60E+01 | 4.60E+01 |
| ENSMUSG00000081250 | Gm15554       | 1.55E-01 | -6.45E+00 | -2.69 | 0.0196 | -4.60E+01 | 4.60E+01 |
| ENSMUSG00000015134 | Aldh1a3       | 2.29E+00 | 2.29E+00  | 1.20  | 0.0025 | 4.59E+01  | 4.59E+01 |
| ENSMUSG00000027977 | Ndst3         | 9.06E+00 | 9.06E+00  | 3.18  | 0.0390 | 4.58E+01  | 4.58E+01 |
| ENSMUSG00000087200 | Lrp8os3       | 1.38E-01 | -7.26E+00 | -2.86 | 0.0254 | -4.56E+01 | 4.56E+01 |
| ENSMUSG00000100158 | Gm28119       | 1.66E-01 | -6.03E+00 | -2.59 | 0.0176 | -4.54E+01 | 4.54E+01 |
| ENSMUSG00000099693 | Gm29284       | 2.00E+00 | 2.00E+00  | 1.00  | 0.0020 | 4.52E+01  | 4.52E+01 |
| ENSMUSG00000098143 | Gm26937       | 1.14E-01 | -8.76E+00 | -3.13 | 0.0376 | -4.52E+01 | 4.52E+01 |
| ENSMUSG00000035785 | Cmtm2b        | 6.01E+00 | 6.01E+00  | 2.59  | 0.0179 | 4.49E+01  | 4.49E+01 |
| ENSMUSG00000092035 | Peg10         | 2.35E+00 | 2.35E+00  | 1.23  | 0.0028 | 4.48E+01  | 4.48E+01 |
| ENSMUSG00000068522 | Aard          | 2.38E-01 | -4.20E+00 | -2.07 | 0.0089 | -4.46E+01 | 4.46E+01 |
| ENSMUSG00000031494 | Cd209a        | 2.72E-01 | -3.67E+00 | -1.88 | 0.0068 | -4.46E+01 | 4.46E+01 |
| ENSMUSG00000002633 | Shh           | 4.59E-01 | -2.18E+00 | -1.12 | 0.0024 | -4.44E+01 | 4.44E+01 |
| ENSMUSG00000038044 | Cct8l1        | 3.03E+00 | 3.03E+00  | 1.60  | 0.0047 | 4.41E+01  | 4.41E+01 |
| ENSMUSG00000001774 | Chordc1       | 4.63E-01 | -2.16E+00 | -1.11 | 0.0024 | -4.41E+01 | 4.41E+01 |
| ENSMUSG00000099182 | Gm8676        | 6.01E+00 | 6.01E+00  | 2.59  | 0.0190 | 4.36E+01  | 4.36E+01 |
| ENSMUSG00000106845 | RP23-270L23.1 | 6.67E+00 | 6.67E+00  | 2.74  | 0.0236 | 4.35E+01  | 4.35E+01 |

|                    |               |          |           |       |        |           |          |
|--------------------|---------------|----------|-----------|-------|--------|-----------|----------|
| ENSMUSG00000107029 | RP23-423A22.3 | 7.98E+00 | 7.98E+00  | 3.00  | 0.0339 | 4.33E+01  | 4.33E+01 |
| ENSMUSG00000050505 | Pcdh20        | 4.13E+00 | 4.13E+00  | 2.05  | 0.0092 | 4.32E+01  | 4.32E+01 |
| ENSMUSG00000076666 | Ighv14-4      | 7.81E+00 | 7.81E+00  | 2.97  | 0.0328 | 4.32E+01  | 4.32E+01 |
| ENSMUSG00000100890 | 1700085C21Rik | 2.28E-01 | -4.39E+00 | -2.14 | 0.0104 | -4.31E+01 | 4.31E+01 |
| ENSMUSG00000097816 | Gm26811       | 4.05E-01 | -2.47E+00 | -1.30 | 0.0033 | -4.31E+01 | 4.31E+01 |
| ENSMUSG00000104279 | Gm38300       | 5.23E+00 | 5.23E+00  | 2.39  | 0.0148 | 4.31E+01  | 4.31E+01 |
| ENSMUSG00000027249 | F2            | 7.11E+00 | 7.11E+00  | 2.83  | 0.0273 | 4.31E+01  | 4.31E+01 |
| ENSMUSG00000027217 | Tspan18       | 2.73E-01 | -3.66E+00 | -1.87 | 0.0073 | -4.30E+01 | 4.30E+01 |
| ENSMUSG00000067338 | Tuba3b        | 4.23E+00 | 4.23E+00  | 2.08  | 0.0097 | 4.29E+01  | 4.29E+01 |
| ENSMUSG00000104222 | Gm7292        | 6.63E+00 | 6.63E+00  | 2.73  | 0.0241 | 4.27E+01  | 4.27E+01 |
| ENSMUSG00000022099 | Dmtn          | 3.85E-01 | -2.60E+00 | -1.38 | 0.0037 | -4.27E+01 | 4.27E+01 |
| ENSMUSG00000095895 | Gm21963       | 1.67E-01 | -6.00E+00 | -2.58 | 0.0198 | -4.26E+01 | 4.26E+01 |
| ENSMUSG00000025473 | Adam8         | 2.33E+00 | 2.33E+00  | 1.22  | 0.0030 | 4.26E+01  | 4.26E+01 |
| ENSMUSG00000103532 | Gm4430        | 3.15E+00 | 3.15E+00  | 1.66  | 0.0055 | 4.25E+01  | 4.25E+01 |
| ENSMUSG00000036853 | Mcoln3        | 2.53E-01 | -3.95E+00 | -1.98 | 0.0086 | -4.25E+01 | 4.25E+01 |
| ENSMUSG00000022445 | Cyp2d26       | 4.59E+00 | 4.59E+00  | 2.20  | 0.0117 | 4.25E+01  | 4.25E+01 |
| ENSMUSG00000061702 | Tmem91        | 6.68E+00 | 6.68E+00  | 2.74  | 0.0248 | 4.24E+01  | 4.24E+01 |
| ENSMUSG00000027224 | Duoxa1        | 7.85E+00 | 7.85E+00  | 2.97  | 0.0343 | 4.24E+01  | 4.24E+01 |
| ENSMUSG00000021364 | Elovl2        | 4.03E+00 | 4.03E+00  | 2.01  | 0.0091 | 4.23E+01  | 4.23E+01 |
| ENSMUSG00000097187 | Gm19426       | 3.39E-01 | -2.95E+00 | -1.56 | 0.0049 | -4.22E+01 | 4.22E+01 |
| ENSMUSG00000072584 | Gm7489        | 1.81E-01 | -5.53E+00 | -2.47 | 0.0173 | -4.20E+01 | 4.20E+01 |
| ENSMUSG00000092085 | Gm17224       | 7.90E+00 | 7.90E+00  | 2.98  | 0.0357 | 4.19E+01  | 4.19E+01 |
| ENSMUSG00000102697 | Pcdhac2       | 1.90E-01 | -5.28E+00 | -2.40 | 0.0159 | -4.18E+01 | 4.18E+01 |
| ENSMUSG00000082907 | Gm14832       | 1.80E-01 | -5.55E+00 | -2.47 | 0.0176 | -4.18E+01 | 4.18E+01 |
| ENSMUSG00000028031 | Dkk2          | 1.93E-01 | -5.17E+00 | -2.37 | 0.0154 | -4.17E+01 | 4.17E+01 |
| ENSMUSG00000063767 | S100a7a       | 1.66E-01 | -6.02E+00 | -2.59 | 0.0209 | -4.16E+01 | 4.16E+01 |
| ENSMUSG00000025037 | Maoa          | 4.14E-01 | -2.41E+00 | -1.27 | 0.0034 | -4.16E+01 | 4.16E+01 |
| ENSMUSG00000027932 | Slc27a3       | 3.29E-01 | -3.04E+00 | -1.60 | 0.0053 | -4.16E+01 | 4.16E+01 |
| ENSMUSG00000105096 | Gbp10         | 4.25E-01 | -2.36E+00 | -1.24 | 0.0032 | -4.14E+01 | 4.14E+01 |
| ENSMUSG00000027070 | Lrp2          | 3.01E-01 | -3.32E+00 | -1.73 | 0.0065 | -4.14E+01 | 4.14E+01 |
| ENSMUSG00000058402 | Zfp420        | 4.64E-01 | -2.15E+00 | -1.11 | 0.0027 | -4.13E+01 | 4.13E+01 |
| ENSMUSG00000104745 | RP23-394K8.3  | 2.27E-01 | -4.41E+00 | -2.14 | 0.0114 | -4.13E+01 | 4.13E+01 |
| ENSMUSG00000099803 | Gm28863       | 7.12E+00 | 7.12E+00  | 2.83  | 0.0297 | 4.13E+01  | 4.13E+01 |
| ENSMUSG00000022596 | Slurp1        | 2.66E-01 | -3.76E+00 | -1.91 | 0.0083 | -4.13E+01 | 4.13E+01 |
| ENSMUSG00000081597 | Gm14506       | 8.06E+00 | 8.06E+00  | 3.01  | 0.0382 | 4.12E+01  | 4.12E+01 |
| ENSMUSG00000049097 | Ankrd34a      | 3.53E+00 | 3.53E+00  | 1.82  | 0.0073 | 4.12E+01  | 4.12E+01 |
| ENSMUSG00000053360 | F730035P03Rik | 6.15E+00 | 6.15E+00  | 2.62  | 0.0223 | 4.12E+01  | 4.12E+01 |
| ENSMUSG00000041592 | Sdk2          | 4.46E+00 | 4.46E+00  | 2.16  | 0.0117 | 4.11E+01  | 4.11E+01 |
| ENSMUSG00000084816 | Platr29       | 7.60E+00 | 7.60E+00  | 2.93  | 0.0345 | 4.09E+01  | 4.09E+01 |
| ENSMUSG00000061728 | Btnl7-ps      | 4.32E+00 | 4.32E+00  | 2.11  | 0.0111 | 4.09E+01  | 4.09E+01 |
| ENSMUSG00000062933 | Gm10123       | 1.17E-01 | -8.52E+00 | -3.09 | 0.0438 | -4.07E+01 | 4.07E+01 |
| ENSMUSG00000020734 | Grin2c        | 3.52E-01 | -2.84E+00 | -1.51 | 0.0049 | -4.07E+01 | 4.07E+01 |
| ENSMUSG00000040809 | Chil3         | 2.30E+00 | 2.30E+00  | 1.20  | 0.0032 | 4.07E+01  | 4.07E+01 |
| ENSMUSG00000028125 | Abca4         | 7.44E+00 | 7.44E+00  | 2.90  | 0.0337 | 4.05E+01  | 4.05E+01 |
| ENSMUSG00000017002 | Sipi          | 2.64E+00 | 2.64E+00  | 1.40  | 0.0043 | 4.05E+01  | 4.05E+01 |
| ENSMUSG00000001901 | Kcnh6         | 9.01E+00 | 9.01E+00  | 3.17  | 0.0495 | 4.05E+01  | 4.05E+01 |
| ENSMUSG00000097652 | Mhrt          | 1.74E-01 | -5.74E+00 | -2.52 | 0.0202 | -4.04E+01 | 4.04E+01 |
| ENSMUSG00000094910 | D430019H16Rik | 3.08E-01 | -3.25E+00 | -1.70 | 0.0065 | -4.02E+01 | 4.02E+01 |
| ENSMUSG00000054046 | Klik13        | 2.60E-01 | -3.85E+00 | -1.94 | 0.0092 | -4.01E+01 | 4.01E+01 |
| ENSMUSG00000047228 | BC048546      | 2.52E+00 | 2.52E+00  | 1.33  | 0.0039 | 4.01E+01  | 4.01E+01 |
| ENSMUSG00000087365 | C430049B03Rik | 1.90E-01 | -5.25E+00 | -2.39 | 0.0172 | -4.01E+01 | 4.01E+01 |
| ENSMUSG00000093079 | Gm25953       | 2.12E-01 | -4.72E+00 | -2.24 | 0.0139 | -4.00E+01 | 4.00E+01 |
| ENSMUSG00000086459 | 1700030C12Rik | 6.83E+00 | 6.83E+00  | 2.77  | 0.0292 | 3.99E+01  | 3.99E+01 |
| ENSMUSG00000081965 | Gm11620       | 6.42E+00 | 6.42E+00  | 2.68  | 0.0259 | 3.99E+01  | 3.99E+01 |
| ENSMUSG00000102398 | Gm37580       | 3.78E+00 | 3.78E+00  | 1.92  | 0.0090 | 3.99E+01  | 3.99E+01 |
| ENSMUSG00000045257 | Morn2         | 4.07E-01 | -2.46E+00 | -1.30 | 0.0038 | -3.99E+01 | 3.99E+01 |
| ENSMUSG00000063626 | Unc5d         | 2.72E-01 | -3.68E+00 | -1.88 | 0.0085 | -3.98E+01 | 3.98E+01 |
| ENSMUSG00000022875 | Kng1          | 8.18E+00 | 8.18E+00  | 3.03  | 0.0423 | 3.98E+01  | 3.98E+01 |
| ENSMUSG00000017679 | Ttpal         | 3.43E+00 | 3.43E+00  | 1.78  | 0.0074 | 3.98E+01  | 3.98E+01 |
| ENSMUSG00000024979 | Tectb         | 7.98E+00 | 7.98E+00  | 3.00  | 0.0404 | 3.97E+01  | 3.97E+01 |
| ENSMUSG00000087115 | Pcsk2os2      | 7.13E+00 | 7.13E+00  | 2.83  | 0.0321 | 3.97E+01  | 3.97E+01 |
| ENSMUSG00000082476 | Gm12242       | 5.79E+00 | 5.79E+00  | 2.53  | 0.0213 | 3.97E+01  | 3.97E+01 |
| ENSMUSG00000106491 | RP23-342M4.2  | 2.90E-01 | -3.44E+00 | -1.78 | 0.0076 | -3.96E+01 | 3.96E+01 |
| ENSMUSG00000032400 | Zwilch        | 4.99E+00 | 4.99E+00  | 2.32  | 0.0159 | 3.96E+01  | 3.96E+01 |
| ENSMUSG00000043773 | 1700048O20Rik | 3.18E+00 | 3.18E+00  | 1.67  | 0.0065 | 3.96E+01  | 3.96E+01 |
| ENSMUSG00000070342 | Gm10287       | 2.99E-01 | -3.34E+00 | -1.74 | 0.0072 | -3.94E+01 | 3.94E+01 |
| ENSMUSG00000097805 | Gm17473       | 1.86E-01 | -5.36E+00 | -2.42 | 0.0186 | -3.94E+01 | 3.94E+01 |

|                    |               |          |           |       |        |           |          |
|--------------------|---------------|----------|-----------|-------|--------|-----------|----------|
| ENSMUSG00000033854 | Kcnk10        | 1.96E-01 | -5.10E+00 | -2.35 | 0.0169 | -3.93E+01 | 3.93E+01 |
| ENSMUSG00000004988 | Fxyd4         | 2.49E+00 | 2.49E+00  | 1.31  | 0.0040 | 3.92E+01  | 3.92E+01 |
| ENSMUSG00000074403 | Hist2h3b      | 2.47E-01 | -4.05E+00 | -2.02 | 0.0108 | -3.91E+01 | 3.91E+01 |
| ENSMUSG00000103377 | Gm37180       | 3.93E-01 | -2.55E+00 | -1.35 | 0.0043 | -3.91E+01 | 3.91E+01 |
| ENSMUSG00000022272 | Myo10         | 4.29E-01 | -2.33E+00 | -1.22 | 0.0036 | -3.90E+01 | 3.90E+01 |
| ENSMUSG00000020599 | Rgs9          | 4.36E-01 | -2.29E+00 | -1.20 | 0.0035 | -3.89E+01 | 3.89E+01 |
| ENSMUSG00000032698 | Lmo2          | 4.09E-01 | -2.45E+00 | -1.29 | 0.0039 | -3.89E+01 | 3.89E+01 |
| ENSMUSG00000068686 | Cd59b         | 2.30E-01 | -4.35E+00 | -2.12 | 0.0125 | -3.89E+01 | 3.89E+01 |
| ENSMUSG00000074491 | Clec4g        | 2.18E+00 | 2.18E+00  | 1.12  | 0.0031 | 3.88E+01  | 3.88E+01 |
| ENSMUSG00000031220 | Awat2         | 4.79E-01 | -2.09E+00 | -1.06 | 0.0029 | -3.87E+01 | 3.87E+01 |
| ENSMUSG00000024044 | Epb4.1l3      | 5.00E-01 | -2.00E+00 | -1.00 | 0.0027 | -3.87E+01 | 3.87E+01 |
| ENSMUSG00000101848 | 4933417E11Rik | 1.71E-01 | -5.86E+00 | -2.55 | 0.0231 | -3.86E+01 | 3.86E+01 |
| ENSMUSG00000041722 | Khdc1c        | 1.71E-01 | -5.86E+00 | -2.55 | 0.0231 | -3.86E+01 | 3.86E+01 |
| ENSMUSG00000021123 | Rdh12         | 8.35E+00 | 8.35E+00  | 3.06  | 0.0469 | 3.85E+01  | 3.85E+01 |
| ENSMUSG00000028399 | Ptprd         | 4.82E-01 | -2.08E+00 | -1.05 | 0.0029 | -3.85E+01 | 3.85E+01 |
| ENSMUSG00000074505 | Fat3          | 2.20E-01 | -4.54E+00 | -2.18 | 0.0140 | -3.84E+01 | 3.84E+01 |
| ENSMUSG00000020884 | Asgr1         | 4.03E-01 | -2.48E+00 | -1.31 | 0.0042 | -3.84E+01 | 3.84E+01 |
| ENSMUSG00000062591 | Tubb4a        | 3.43E-01 | -2.91E+00 | -1.54 | 0.0058 | -3.84E+01 | 3.84E+01 |
| ENSMUSG00000084399 | Gm15666       | 3.28E-01 | -3.05E+00 | -1.61 | 0.0064 | -3.82E+01 | 3.82E+01 |
| ENSMUSG00000105750 | RP23-10F17.2  | 3.85E-01 | -2.59E+00 | -1.38 | 0.0046 | -3.81E+01 | 3.81E+01 |
| ENSMUSG00000063632 | Sox11         | 1.89E-01 | -5.29E+00 | -2.40 | 0.0193 | -3.81E+01 | 3.81E+01 |
| ENSMUSG00000044707 | Ccnjl         | 3.95E-01 | -2.53E+00 | -1.34 | 0.0044 | -3.81E+01 | 3.81E+01 |
| ENSMUSG00000023886 | Smoc2         | 2.31E+00 | 2.31E+00  | 1.21  | 0.0037 | 3.81E+01  | 3.81E+01 |
| ENSMUSG00000105022 | RP23-151D16.2 | 2.54E+00 | 2.54E+00  | 1.35  | 0.0045 | 3.80E+01  | 3.80E+01 |
| ENSMUSG00000081490 | Gm11830       | 6.20E+00 | 6.20E+00  | 2.63  | 0.0268 | 3.79E+01  | 3.79E+01 |
| ENSMUSG00000034771 | Tle2          | 2.77E-01 | -3.61E+00 | -1.85 | 0.0091 | -3.78E+01 | 3.78E+01 |
| ENSMUSG00000070699 | Sars2         | 3.82E-01 | -2.62E+00 | -1.39 | 0.0048 | -3.77E+01 | 3.77E+01 |
| ENSMUSG00000102548 | Gm16701       | 5.69E+00 | 5.69E+00  | 2.51  | 0.0228 | 3.77E+01  | 3.77E+01 |
| ENSMUSG00000024028 | Tff2          | 2.96E-01 | -3.37E+00 | -1.75 | 0.0080 | -3.76E+01 | 3.76E+01 |
| ENSMUSG00000048230 | Fbxo43        | 7.88E+00 | 7.88E+00  | 2.98  | 0.0441 | 3.75E+01  | 3.75E+01 |
| ENSMUSG00000038388 | Mpp6          | 2.73E+00 | 2.73E+00  | 1.45  | 0.0053 | 3.75E+01  | 3.75E+01 |
| ENSMUSG00000085177 | Gm11209       | 2.41E-01 | -4.15E+00 | -2.05 | 0.0122 | -3.75E+01 | 3.75E+01 |
| ENSMUSG00000027656 | Wisp2         | 3.42E-01 | -2.93E+00 | -1.55 | 0.0061 | -3.74E+01 | 3.74E+01 |
| ENSMUSG00000067224 | Gm3695        | 2.28E-01 | -4.39E+00 | -2.13 | 0.0138 | -3.74E+01 | 3.74E+01 |
| ENSMUSG00000003469 | Phyhip        | 2.24E+00 | 2.24E+00  | 1.17  | 0.0036 | 3.74E+01  | 3.74E+01 |
| ENSMUSG00000021388 | Aspn          | 3.54E-01 | -2.82E+00 | -1.50 | 0.0057 | -3.73E+01 | 3.73E+01 |
| ENSMUSG00000075829 | Gm23692       | 3.75E-01 | -2.66E+00 | -1.41 | 0.0051 | -3.73E+01 | 3.73E+01 |
| ENSMUSG00000021708 | Rasgrf2       | 3.37E-01 | -2.97E+00 | -1.57 | 0.0064 | -3.73E+01 | 3.73E+01 |
| ENSMUSG00000105135 | RP23-418O21.3 | 3.92E-01 | -2.55E+00 | -1.35 | 0.0047 | -3.72E+01 | 3.72E+01 |
| ENSMUSG00000019817 | Plagl1        | 4.86E-01 | -2.06E+00 | -1.04 | 0.0031 | -3.72E+01 | 3.72E+01 |
| ENSMUSG00000050097 | Ces2b         | 1.41E-01 | -7.08E+00 | -2.82 | 0.0363 | -3.71E+01 | 3.71E+01 |
| ENSMUSG00000052516 | Robo2         | 3.53E-01 | -2.83E+00 | -1.50 | 0.0058 | -3.71E+01 | 3.71E+01 |
| ENSMUSG00000085606 | Gm15792       | 6.84E+00 | 6.84E+00  | 2.77  | 0.0341 | 3.71E+01  | 3.71E+01 |
| ENSMUSG00000022676 | Snai2         | 2.58E-01 | -3.88E+00 | -1.96 | 0.0109 | -3.71E+01 | 3.71E+01 |
| ENSMUSG00000085936 | 2610307P16Rik | 2.68E-01 | -3.73E+00 | -1.90 | 0.0102 | -3.70E+01 | 3.70E+01 |
| ENSMUSG00000031673 | Cdh11         | 3.69E-01 | -2.71E+00 | -1.44 | 0.0054 | -3.70E+01 | 3.70E+01 |
| ENSMUSG00000101268 | 2010310C07Rik | 2.35E+00 | 2.35E+00  | 1.23  | 0.0040 | 3.70E+01  | 3.70E+01 |
| ENSMUSG00000100235 | Gm28557       | 3.95E-01 | -2.53E+00 | -1.34 | 0.0047 | -3.69E+01 | 3.69E+01 |
| ENSMUSG00000004842 | Pou1f1        | 8.05E+00 | 8.05E+00  | 3.01  | 0.0479 | 3.68E+01  | 3.68E+01 |
| ENSMUSG00000083698 | Gm12687       | 1.71E-01 | -5.85E+00 | -2.55 | 0.0254 | -3.67E+01 | 3.67E+01 |
| ENSMUSG00000028780 | Sema3c        | 2.86E-01 | -3.50E+00 | -1.81 | 0.0092 | -3.66E+01 | 3.66E+01 |
| ENSMUSG00000032649 | Colgalt2      | 4.22E-01 | -2.37E+00 | -1.24 | 0.0042 | -3.66E+01 | 3.66E+01 |
| ENSMUSG00000028417 | Tal2          | 3.94E+00 | 3.94E+00  | 1.98  | 0.0118 | 3.64E+01  | 3.64E+01 |
| ENSMUSG00000054753 | AU018091      | 7.32E+00 | 7.32E+00  | 2.87  | 0.0407 | 3.63E+01  | 3.63E+01 |
| ENSMUSG00000103834 | Gm37613       | 2.45E-01 | -4.08E+00 | -2.03 | 0.0127 | -3.63E+01 | 3.63E+01 |
| ENSMUSG00000025933 | Tmem14a       | 2.65E-01 | -3.77E+00 | -1.91 | 0.0108 | -3.62E+01 | 3.62E+01 |
| ENSMUSG00000028262 | Clca3a2       | 4.56E+00 | 4.56E+00  | 2.19  | 0.0159 | 3.62E+01  | 3.62E+01 |
| ENSMUSG00000021280 | Exoc3l4       | 4.09E-01 | -2.45E+00 | -1.29 | 0.0046 | -3.61E+01 | 3.61E+01 |
| ENSMUSG00000042834 | Nrep          | 3.13E-01 | -3.19E+00 | -1.67 | 0.0078 | -3.61E+01 | 3.61E+01 |
| ENSMUSG00000097134 | 1110002J07Rik | 7.12E+00 | 7.12E+00  | 2.83  | 0.0389 | 3.61E+01  | 3.61E+01 |
| ENSMUSG00000041731 | Pgm5          | 3.69E-01 | -2.71E+00 | -1.44 | 0.0056 | -3.60E+01 | 3.60E+01 |
| ENSMUSG00000022996 | Wnt10b        | 2.57E-01 | -3.90E+00 | -1.96 | 0.0117 | -3.60E+01 | 3.60E+01 |
| ENSMUSG00000025666 | Tmem47        | 4.08E-01 | -2.45E+00 | -1.29 | 0.0047 | -3.59E+01 | 3.59E+01 |
| ENSMUSG00000061863 | Gm6822        | 7.40E+00 | 7.40E+00  | 2.89  | 0.0425 | 3.59E+01  | 3.59E+01 |
| ENSMUSG00000029255 | Gnrhr         | 4.02E+00 | 4.02E+00  | 2.01  | 0.0126 | 3.58E+01  | 3.58E+01 |
| ENSMUSG00000021609 | Slc6a3        | 7.39E+00 | 7.39E+00  | 2.89  | 0.0427 | 3.58E+01  | 3.58E+01 |
| ENSMUSG00000031070 | Mrgprf        | 3.34E-01 | -3.00E+00 | -1.58 | 0.0071 | -3.56E+01 | 3.56E+01 |

|                    |                |          |           |       |        |           |          |
|--------------------|----------------|----------|-----------|-------|--------|-----------|----------|
| ENSMUSG00000081389 | Gm13368        | 5.25E+00 | 5.25E+00  | 2.39  | 0.0218 | 3.56E+01  | 3.56E+01 |
| ENSMUSG00000036123 | Slc9a3         | 4.17E+00 | 4.17E+00  | 2.06  | 0.0138 | 3.55E+01  | 3.55E+01 |
| ENSMUSG00000079852 | Klra4          | 1.92E-01 | -5.22E+00 | -2.38 | 0.0218 | -3.53E+01 | 3.53E+01 |
| ENSMUSG00000040447 | Spns2          | 4.57E-01 | -2.19E+00 | -1.13 | 0.0038 | -3.53E+01 | 3.53E+01 |
| ENSMUSG00000097467 | Gm26737        | 5.74E+00 | 5.74E+00  | 2.52  | 0.0266 | 3.52E+01  | 3.52E+01 |
| ENSMUSG00000086482 | 1700012C08Rik  | 2.80E-01 | -3.57E+00 | -1.84 | 0.0103 | -3.52E+01 | 3.52E+01 |
| ENSMUSG00000052921 | Arhgef15       | 2.83E-01 | -3.54E+00 | -1.82 | 0.0101 | -3.51E+01 | 3.51E+01 |
| ENSMUSG00000106749 | RP24-79P8.1    | 4.46E-01 | -2.24E+00 | -1.16 | 0.0041 | -3.50E+01 | 3.50E+01 |
| ENSMUSG00000037071 | Scd1           | 2.80E-01 | -3.57E+00 | -1.83 | 0.0104 | -3.50E+01 | 3.50E+01 |
| ENSMUSG00000083226 | Gm7831         | 7.23E+00 | 7.23E+00  | 2.85  | 0.0428 | 3.50E+01  | 3.50E+01 |
| ENSMUSG00000099465 | Gm3830         | 6.85E+00 | 6.85E+00  | 2.78  | 0.0385 | 3.49E+01  | 3.49E+01 |
| ENSMUSG00000047420 | Fam180a        | 2.02E-01 | -4.95E+00 | -2.31 | 0.0202 | -3.48E+01 | 3.48E+01 |
| ENSMUSG00000037940 | Inpp4b         | 3.45E-01 | -2.90E+00 | -1.54 | 0.0069 | -3.48E+01 | 3.48E+01 |
| ENSMUSG00000023978 | Prph2          | 6.65E+00 | 6.65E+00  | 2.73  | 0.0367 | 3.47E+01  | 3.47E+01 |
| ENSMUSG00000031842 | Pde4c          | 5.19E+00 | 5.19E+00  | 2.38  | 0.0223 | 3.47E+01  | 3.47E+01 |
| ENSMUSG00000037379 | Spon2          | 2.11E-01 | -4.75E+00 | -2.25 | 0.0187 | -3.47E+01 | 3.47E+01 |
| ENSMUSG00000026874 | Hc             | 2.86E-01 | -3.50E+00 | -1.81 | 0.0102 | -3.46E+01 | 3.46E+01 |
| ENSMUSG00000103577 | 9330162B11Rik  | 2.13E-01 | -4.69E+00 | -2.23 | 0.0185 | -3.44E+01 | 3.44E+01 |
| ENSMUSG00000103145 | Gm37744        | 5.56E+00 | 5.56E+00  | 2.47  | 0.0261 | 3.44E+01  | 3.44E+01 |
| ENSMUSG00000076471 | Trbv14         | 1.93E-01 | -5.19E+00 | -2.38 | 0.0227 | -3.44E+01 | 3.44E+01 |
| ENSMUSG00000055102 | Zfp819         | 7.05E+00 | 7.05E+00  | 2.82  | 0.0420 | 3.44E+01  | 3.44E+01 |
| ENSMUSG00000034810 | Scn7a          | 3.52E-01 | -2.84E+00 | -1.51 | 0.0068 | -3.44E+01 | 3.44E+01 |
| ENSMUSG00000083674 | Zfp133-ps      | 3.99E-01 | -2.51E+00 | -1.33 | 0.0053 | -3.43E+01 | 3.43E+01 |
| ENSMUSG00000103959 | Gm37720        | 2.35E-01 | -4.26E+00 | -2.09 | 0.0154 | -3.43E+01 | 3.43E+01 |
| ENSMUSG00000029564 | 4930519G04Rik  | 5.92E+00 | 5.92E+00  | 2.57  | 0.0298 | 3.43E+01  | 3.43E+01 |
| ENSMUSG00000062444 | Ap3b2          | 3.41E+00 | 3.41E+00  | 1.77  | 0.0100 | 3.42E+01  | 3.42E+01 |
| ENSMUSG00000050215 | Olfir70        | 6.91E+00 | 6.91E+00  | 2.79  | 0.0409 | 3.42E+01  | 3.42E+01 |
| ENSMUSG00000058101 | 1700084J12Rik  | 3.36E-01 | -2.98E+00 | -1.57 | 0.0076 | -3.42E+01 | 3.42E+01 |
| ENSMUSG00000005320 | Fgfr4          | 3.66E-01 | -2.73E+00 | -1.45 | 0.0065 | -3.40E+01 | 3.40E+01 |
| ENSMUSG00000068689 | Rps19-ps9      | 5.53E+00 | 5.53E+00  | 2.47  | 0.0265 | 3.39E+01  | 3.39E+01 |
| ENSMUSG00000083250 | Gm5403         | 4.72E-01 | -2.12E+00 | -1.08 | 0.0039 | -3.39E+01 | 3.39E+01 |
| ENSMUSG00000105160 | RP23-272P19.10 | 2.17E-01 | -4.60E+00 | -2.20 | 0.0185 | -3.38E+01 | 3.38E+01 |
| ENSMUSG00000044086 | Lmod3          | 3.08E-01 | -3.25E+00 | -1.70 | 0.0093 | -3.37E+01 | 3.37E+01 |
| ENSMUSG00000103401 | Gm37929        | 1.42E-01 | -7.05E+00 | -2.82 | 0.0439 | -3.37E+01 | 3.37E+01 |
| ENSMUSG00000045915 | Ccdc42         | 1.96E-01 | -5.10E+00 | -2.35 | 0.0230 | -3.37E+01 | 3.37E+01 |
| ENSMUSG00000106536 | RP23-394K8.5   | 2.51E-01 | -3.99E+00 | -2.00 | 0.0141 | -3.36E+01 | 3.36E+01 |
| ENSMUSG00000000402 | Egfl6          | 3.30E-01 | -3.03E+00 | -1.60 | 0.0081 | -3.36E+01 | 3.36E+01 |
| ENSMUSG00000020695 | Mrc2           | 3.35E-01 | -2.99E+00 | -1.58 | 0.0079 | -3.36E+01 | 3.36E+01 |
| ENSMUSG00000095306 | Gm21807        | 2.24E-01 | -4.47E+00 | -2.16 | 0.0177 | -3.36E+01 | 3.36E+01 |
| ENSMUSG00000086843 | E030013I19Rik  | 2.05E-01 | -4.89E+00 | -2.29 | 0.0214 | -3.34E+01 | 3.34E+01 |
| ENSMUSG00000086105 | Gm11636        | 1.37E-01 | -7.28E+00 | -2.86 | 0.0477 | -3.33E+01 | 3.33E+01 |
| ENSMUSG00000063820 | Arl9           | 6.15E+00 | 6.15E+00  | 2.62  | 0.0341 | 3.33E+01  | 3.33E+01 |
| ENSMUSG00000101926 | Gm28904        | 2.79E-01 | -3.59E+00 | -1.84 | 0.0117 | -3.32E+01 | 3.32E+01 |
| ENSMUSG00000031099 | Smarca1        | 4.07E-01 | -2.46E+00 | -1.30 | 0.0055 | -3.32E+01 | 3.32E+01 |
| ENSMUSG00000079507 | H2-Q1          | 2.77E-01 | -3.60E+00 | -1.85 | 0.0119 | -3.31E+01 | 3.31E+01 |
| ENSMUSG00000028082 | Sh3d19         | 3.67E-01 | -2.73E+00 | -1.45 | 0.0068 | -3.31E+01 | 3.31E+01 |
| ENSMUSG00000097058 | 4930556M19Rik  | 6.75E+00 | 6.75E+00  | 2.76  | 0.0418 | 3.30E+01  | 3.30E+01 |
| ENSMUSG00000097401 | Gm26744        | 4.37E-01 | -2.29E+00 | -1.19 | 0.0048 | -3.30E+01 | 3.30E+01 |
| ENSMUSG00000027380 | Acox1          | 1.96E-01 | -5.09E+00 | -2.35 | 0.0239 | -3.30E+01 | 3.30E+01 |
| ENSMUSG00000106734 | RP24-328P2.5   | 3.04E-01 | -3.28E+00 | -1.72 | 0.0099 | -3.30E+01 | 3.30E+01 |
| ENSMUSG00000040289 | Hey1           | 2.93E-01 | -3.41E+00 | -1.77 | 0.0107 | -3.29E+01 | 3.29E+01 |
| ENSMUSG00000022372 | Sla            | 2.82E+00 | 2.82E+00  | 1.50  | 0.0074 | 3.29E+01  | 3.29E+01 |
| ENSMUSG00000040485 | Lrrc52         | 2.24E-01 | -4.47E+00 | -2.16 | 0.0185 | -3.29E+01 | 3.29E+01 |
| ENSMUSG00000087264 | Gad1os         | 2.49E-01 | -4.01E+00 | -2.00 | 0.0149 | -3.29E+01 | 3.29E+01 |
| ENSMUSG00000104823 | RP23-336O18.2  | 4.91E+00 | 4.91E+00  | 2.29  | 0.0224 | 3.28E+01  | 3.28E+01 |
| ENSMUSG00000097714 | Gm20109        | 7.06E+00 | 7.06E+00  | 2.82  | 0.0467 | 3.27E+01  | 3.27E+01 |
| ENSMUSG00000036928 | Stag3          | 2.70E+00 | 2.70E+00  | 1.43  | 0.0069 | 3.26E+01  | 3.26E+01 |
| ENSMUSG00000026418 | Tnni1          | 4.25E+00 | 4.25E+00  | 2.09  | 0.0171 | 3.25E+01  | 3.25E+01 |
| ENSMUSG00000106265 | RP23-201E13.1  | 4.33E-01 | -2.31E+00 | -1.21 | 0.0051 | -3.24E+01 | 3.24E+01 |
| ENSMUSG00000097305 | Gm17276        | 2.35E-01 | -4.25E+00 | -2.09 | 0.0174 | -3.23E+01 | 3.23E+01 |
| ENSMUSG00000048538 | Gm9826         | 2.88E+00 | 2.88E+00  | 1.53  | 0.0080 | 3.23E+01  | 3.23E+01 |
| ENSMUSG00000097448 | Platr22        | 3.08E-01 | -3.24E+00 | -1.70 | 0.0101 | -3.22E+01 | 3.22E+01 |
| ENSMUSG00000024027 | Glp1r          | 1.79E-01 | -5.58E+00 | -2.48 | 0.0302 | -3.21E+01 | 3.21E+01 |
| ENSMUSG00000018776 | Slc35g3        | 2.06E+00 | 2.06E+00  | 1.04  | 0.0041 | 3.21E+01  | 3.21E+01 |
| ENSMUSG00000068417 | Pnp2           | 3.45E+00 | 3.45E+00  | 1.79  | 0.0117 | 3.20E+01  | 3.20E+01 |
| ENSMUSG00000074001 | Klhl40         | 5.74E+00 | 5.74E+00  | 2.52  | 0.0322 | 3.20E+01  | 3.20E+01 |
| ENSMUSG00000097736 | 9530059O14Rik  | 1.83E-01 | -5.46E+00 | -2.45 | 0.0293 | -3.19E+01 | 3.19E+01 |

|                     |               |          |           |       |        |           |          |
|---------------------|---------------|----------|-----------|-------|--------|-----------|----------|
| ENSMUSG00000072875  | Gpr27         | 1.86E-01 | -5.36E+00 | -2.42 | 0.0283 | -3.19E+01 | 3.19E+01 |
| ENSMUSG00000090104  | SImapos2      | 2.39E+00 | 2.39E+00  | 1.25  | 0.0057 | 3.17E+01  | 3.17E+01 |
| ENSMUSG00000062309  | Rpp25         | 3.01E-01 | -3.32E+00 | -1.73 | 0.0110 | -3.16E+01 | 3.16E+01 |
| ENSMUSG00000037833  | Sh2d4b        | 3.23E+00 | 3.23E+00  | 1.69  | 0.0105 | 3.16E+01  | 3.16E+01 |
| ENSMUSG00000080851  | Gm12094       | 1.85E-01 | -5.41E+00 | -2.43 | 0.0293 | -3.16E+01 | 3.16E+01 |
| ENSMUSG00000071856  | Mcc           | 2.86E-01 | -3.49E+00 | -1.80 | 0.0122 | -3.16E+01 | 3.16E+01 |
| ENSMUSG00000031147  | Magix         | 3.47E-01 | -2.88E+00 | -1.53 | 0.0084 | -3.14E+01 | 3.14E+01 |
| ENSMUSG00000101905  | 4930439D14Rik | 1.51E-01 | -6.64E+00 | -2.73 | 0.0449 | -3.13E+01 | 3.13E+01 |
| ENSMUSG00000104445  | Rhbg          | 4.78E-01 | -2.09E+00 | -1.07 | 0.0045 | -3.13E+01 | 3.13E+01 |
| ENSMUSG00000006390  | Elovl1        | 4.42E-01 | -2.26E+00 | -1.18 | 0.0052 | -3.13E+01 | 3.13E+01 |
| ENSMUSG00000102781  | Pla2r1        | 2.77E-01 | -3.61E+00 | -1.85 | 0.0134 | -3.12E+01 | 3.12E+01 |
| ENSMUSG00000024598  | Fbn2          | 2.86E-01 | -3.49E+00 | -1.80 | 0.0126 | -3.11E+01 | 3.11E+01 |
| ENSMUSG00000037974  | Muc5ac        | 2.68E+00 | 2.68E+00  | 1.42  | 0.0075 | 3.10E+01  | 3.10E+01 |
| ENSMUSG00000073739  | Gm16287       | 5.81E+00 | 5.81E+00  | 2.54  | 0.0354 | 3.09E+01  | 3.09E+01 |
| ENSMUSG00000044461  | Shisa2        | 1.92E-01 | -5.22E+00 | -2.38 | 0.0286 | -3.09E+01 | 3.09E+01 |
| ENSMUSG00000086807  | Platr21       | 4.09E-01 | -2.45E+00 | -1.29 | 0.0063 | -3.09E+01 | 3.09E+01 |
| ENSMUSG00000065086  | Gm26495       | 2.26E-01 | -4.42E+00 | -2.14 | 0.0206 | -3.08E+01 | 3.08E+01 |
| ENSMUSG00000026401  | Daf2          | 2.53E-01 | -3.95E+00 | -1.98 | 0.0164 | -3.08E+01 | 3.08E+01 |
| ENSMUSG00000035228  | Ccdc106       | 5.35E+00 | 5.35E+00  | 2.42  | 0.0302 | 3.08E+01  | 3.08E+01 |
| ENSMUSG00000040147  | Maob          | 3.94E-01 | -2.54E+00 | -1.34 | 0.0068 | -3.08E+01 | 3.08E+01 |
| ENSMUSG00000078365  | Mos           | 2.97E+00 | 2.97E+00  | 1.57  | 0.0093 | 3.07E+01  | 3.07E+01 |
| ENSMUSG00000102759  | Gm10463       | 6.63E+00 | 6.63E+00  | 2.73  | 0.0468 | 3.06E+01  | 3.06E+01 |
| ENSMUSG00000059187  | Fam19a1       | 4.16E-01 | -2.40E+00 | -1.26 | 0.0062 | -3.06E+01 | 3.06E+01 |
| ENSMUSG00000103291  | Gm38235       | 4.39E-01 | -2.28E+00 | -1.19 | 0.0055 | -3.06E+01 | 3.06E+01 |
| ENSMUSG00000036196  | Slc26a8       | 4.49E+00 | 4.49E+00  | 2.17  | 0.0216 | 3.06E+01  | 3.06E+01 |
| ENSMUSG00000085442  | Gm3362        | 4.00E-01 | -2.50E+00 | -1.32 | 0.0067 | -3.06E+01 | 3.06E+01 |
| ENSMUSG00000021314  | Amph          | 3.40E-01 | -2.94E+00 | -1.55 | 0.0092 | -3.05E+01 | 3.05E+01 |
| ENSMUSG00000020032  | Nuak1         | 3.52E-01 | -2.84E+00 | -1.51 | 0.0087 | -3.05E+01 | 3.05E+01 |
| ENSMUSG00000033774  | Npbwr1        | 3.17E+00 | 3.17E+00  | 1.66  | 0.0108 | 3.05E+01  | 3.05E+01 |
| ENSMUSG000000082128 | Gm11824       | 5.27E+00 | 5.27E+00  | 2.40  | 0.0298 | 3.05E+01  | 3.05E+01 |
| ENSMUSG00000101179  | Gm29455       | 3.61E-01 | -2.77E+00 | -1.47 | 0.0083 | -3.05E+01 | 3.05E+01 |
| ENSMUSG00000082100  | Glns-ps1      | 2.69E+00 | 2.69E+00  | 1.43  | 0.0078 | 3.04E+01  | 3.04E+01 |
| ENSMUSG00000088389  | Gm24685       | 2.68E-01 | -3.74E+00 | -1.90 | 0.0151 | -3.04E+01 | 3.04E+01 |
| ENSMUSG00000097082  | 4933440J02Rik | 1.89E-01 | -5.29E+00 | -2.40 | 0.0304 | -3.04E+01 | 3.04E+01 |
| ENSMUSG00000097068  | Gm26760       | 2.28E-01 | -4.38E+00 | -2.13 | 0.0209 | -3.03E+01 | 3.03E+01 |
| ENSMUSG00000050234  | Gja4          | 3.34E-01 | -3.00E+00 | -1.58 | 0.0098 | -3.03E+01 | 3.03E+01 |
| ENSMUSG00000107184  | Gm18222       | 4.11E+00 | 4.11E+00  | 2.04  | 0.0184 | 3.03E+01  | 3.03E+01 |
| ENSMUSG00000105975  | RP24-372J8.3  | 2.49E-01 | -4.01E+00 | -2.00 | 0.0175 | -3.03E+01 | 3.03E+01 |
| ENSMUSG00000049690  | Nckap5        | 2.77E-01 | -3.62E+00 | -1.85 | 0.0143 | -3.03E+01 | 3.03E+01 |
| ENSMUSG00000043383  | Olf1342       | 1.68E-01 | -5.94E+00 | -2.57 | 0.0387 | -3.02E+01 | 3.02E+01 |
| ENSMUSG00000097263  | Gm26804       | 2.34E-01 | -4.27E+00 | -2.09 | 0.0200 | -3.02E+01 | 3.02E+01 |
| ENSMUSG00000105993  | RP23-280E8.2  | 3.72E+00 | 3.72E+00  | 1.89  | 0.0152 | 3.01E+01  | 3.01E+01 |
| ENSMUSG00000020829  | Slc46a1       | 3.59E-01 | -2.78E+00 | -1.48 | 0.0086 | -3.01E+01 | 3.01E+01 |
| ENSMUSG00000050241  | Klre1         | 3.45E-01 | -2.90E+00 | -1.53 | 0.0093 | -3.01E+01 | 3.01E+01 |
| ENSMUSG00000050288  | Fzd2          | 3.54E-01 | -2.82E+00 | -1.50 | 0.0089 | -3.00E+01 | 3.00E+01 |
| ENSMUSG00000041757  | Plekha6       | 3.79E-01 | -2.64E+00 | -1.40 | 0.0078 | -3.00E+01 | 3.00E+01 |
| ENSMUSG00000041426  | Hibch         | 4.59E-01 | -2.18E+00 | -1.12 | 0.0053 | -2.99E+01 | 2.99E+01 |
| ENSMUSG00000034762  | Glis1         | 4.87E+00 | 4.87E+00  | 2.28  | 0.0267 | 2.98E+01  | 2.98E+01 |
| ENSMUSG00000100490  | Gm28455       | 3.78E+00 | 3.78E+00  | 1.92  | 0.0161 | 2.98E+01  | 2.98E+01 |
| ENSMUSG00000026816  | Gtf3c5        | 4.57E-01 | -2.19E+00 | -1.13 | 0.0054 | -2.97E+01 | 2.97E+01 |
| ENSMUSG00000025766  | D3Ertd751e    | 3.54E-01 | -2.83E+00 | -1.50 | 0.0091 | -2.97E+01 | 2.97E+01 |
| ENSMUSG00000071335  | G630090E17Rik | 2.33E-01 | -4.30E+00 | -2.10 | 0.0210 | -2.97E+01 | 2.97E+01 |
| ENSMUSG00000091556  | Gm14569       | 3.62E-01 | -2.76E+00 | -1.46 | 0.0087 | -2.97E+01 | 2.97E+01 |
| ENSMUSG00000030134  | Rasgef1a      | 3.36E-01 | -2.97E+00 | -1.57 | 0.0101 | -2.96E+01 | 2.96E+01 |
| ENSMUSG00000097636  | 5830416P10Rik | 2.43E+00 | 2.43E+00  | 1.28  | 0.0067 | 2.96E+01  | 2.96E+01 |
| ENSMUSG00000025789  | St8sia2       | 4.49E-01 | -2.23E+00 | -1.16 | 0.0057 | -2.96E+01 | 2.96E+01 |
| ENSMUSG00000101433  | Gm29441       | 5.35E+00 | 5.35E+00  | 2.42  | 0.0329 | 2.95E+01  | 2.95E+01 |
| ENSMUSG00000097930  | C330002G04Rik | 2.23E+00 | 2.23E+00  | 1.16  | 0.0057 | 2.95E+01  | 2.95E+01 |
| ENSMUSG00000052435  | Cebpe         | 3.92E+00 | 3.92E+00  | 1.97  | 0.0176 | 2.95E+01  | 2.95E+01 |
| ENSMUSG00000017007  | Rbpjl         | 2.86E-01 | -3.50E+00 | -1.81 | 0.0141 | -2.94E+01 | 2.94E+01 |
| ENSMUSG00000047104  | Pbp2          | 3.88E-01 | -2.57E+00 | -1.36 | 0.0077 | -2.93E+01 | 2.93E+01 |
| ENSMUSG00000082223  | Gm15079       | 2.01E+00 | 2.01E+00  | 1.01  | 0.0047 | 2.93E+01  | 2.93E+01 |
| ENSMUSG00000083618  | Gm11771       | 4.75E+00 | 4.75E+00  | 2.25  | 0.0263 | 2.93E+01  | 2.93E+01 |
| ENSMUSG00000102526  | Gm37785       | 2.52E+00 | 2.52E+00  | 1.33  | 0.0074 | 2.93E+01  | 2.93E+01 |
| ENSMUSG00000074415  | 2610203C20Rik | 3.98E-01 | -2.51E+00 | -1.33 | 0.0074 | -2.92E+01 | 2.92E+01 |
| ENSMUSG00000068574  | Olf458        | 2.68E+00 | 2.68E+00  | 1.42  | 0.0084 | 2.92E+01  | 2.92E+01 |
| ENSMUSG00000093673  | Gm20644       | 6.45E+00 | 6.45E+00  | 2.69  | 0.0489 | 2.92E+01  | 2.92E+01 |

|                    |               |          |           |       |        |           |          |
|--------------------|---------------|----------|-----------|-------|--------|-----------|----------|
| ENSMUSG00000090105 | Gm15890       | 2.57E+00 | 2.57E+00  | 1.36  | 0.0078 | 2.92E+01  | 2.92E+01 |
| ENSMUSG00000087027 | Gm13206       | 5.30E+00 | 5.30E+00  | 2.41  | 0.0331 | 2.92E+01  | 2.92E+01 |
| ENSMUSG00000099989 | Gm20281       | 2.27E-01 | -4.41E+00 | -2.14 | 0.0229 | -2.91E+01 | 2.91E+01 |
| ENSMUSG00000005360 | Slc1a3        | 4.94E-01 | -2.02E+00 | -1.02 | 0.0048 | -2.91E+01 | 2.91E+01 |
| ENSMUSG00000084240 | Gm15383       | 3.88E-01 | -2.58E+00 | -1.36 | 0.0078 | -2.91E+01 | 2.91E+01 |
| ENSMUSG00000092622 | Khdc3         | 2.68E+00 | 2.68E+00  | 1.42  | 0.0086 | 2.89E+01  | 2.89E+01 |
| ENSMUSG00000081769 | Gm12216       | 4.09E-01 | -2.45E+00 | -1.29 | 0.0072 | -2.89E+01 | 2.89E+01 |
| ENSMUSG00000085135 | Gm13713       | 2.11E-01 | -4.75E+00 | -2.25 | 0.0271 | -2.88E+01 | 2.88E+01 |
| ENSMUSG00000033420 | Antxr1        | 3.44E-01 | -2.91E+00 | -1.54 | 0.0102 | -2.88E+01 | 2.88E+01 |
| ENSMUSG00000087397 | Rapgef3os2    | 4.69E+00 | 4.69E+00  | 2.23  | 0.0266 | 2.88E+01  | 2.88E+01 |
| ENSMUSG00000039714 | Cplx3         | 5.88E+00 | 5.88E+00  | 2.56  | 0.0420 | 2.87E+01  | 2.87E+01 |
| ENSMUSG00000107290 | RP24-383P24.2 | 4.46E-01 | -2.24E+00 | -1.17 | 0.0061 | -2.87E+01 | 2.87E+01 |
| ENSMUSG00000037440 | Vnn1          | 2.78E-01 | -3.60E+00 | -1.85 | 0.0158 | -2.86E+01 | 2.86E+01 |
| ENSMUSG00000063063 | Ctnna2        | 1.66E-01 | -6.02E+00 | -2.59 | 0.0442 | -2.86E+01 | 2.86E+01 |
| ENSMUSG00000053388 | Trim50        | 5.04E+00 | 5.04E+00  | 2.33  | 0.0310 | 2.86E+01  | 2.86E+01 |
| ENSMUSG00000085514 | Bcas3os2      | 3.20E-01 | -3.13E+00 | -1.65 | 0.0120 | -2.86E+01 | 2.86E+01 |
| ENSMUSG00000020546 | Stxbp4        | 2.58E-01 | -3.87E+00 | -1.95 | 0.0184 | -2.86E+01 | 2.86E+01 |
| ENSMUSG00000022774 | Ncbp2         | 4.05E-01 | -2.47E+00 | -1.30 | 0.0075 | -2.85E+01 | 2.85E+01 |
| ENSMUSG00000070511 | Gm10295       | 1.89E-01 | -5.29E+00 | -2.40 | 0.0344 | -2.85E+01 | 2.85E+01 |
| ENSMUSG00000031274 | Col4a5        | 3.84E-01 | -2.60E+00 | -1.38 | 0.0084 | -2.85E+01 | 2.85E+01 |
| ENSMUSG00000097120 | Gm26887       | 3.18E+00 | 3.18E+00  | 1.67  | 0.0125 | 2.84E+01  | 2.84E+01 |
| ENSMUSG00000041012 | Cmtm8         | 4.19E-01 | -2.39E+00 | -1.26 | 0.0071 | -2.84E+01 | 2.84E+01 |
| ENSMUSG00000022762 | Ncam2         | 3.35E-01 | -2.99E+00 | -1.58 | 0.0111 | -2.84E+01 | 2.84E+01 |
| ENSMUSG00000032015 | Pou2f3        | 5.22E+00 | 5.22E+00  | 2.39  | 0.0340 | 2.84E+01  | 2.84E+01 |
| ENSMUSG00000025488 | Cox8b         | 3.63E-01 | -2.76E+00 | -1.46 | 0.0095 | -2.83E+01 | 2.83E+01 |
| ENSMUSG00000058145 | Adamts17      | 2.61E-01 | -3.82E+00 | -1.94 | 0.0183 | -2.83E+01 | 2.83E+01 |
| ENSMUSG00000025893 | Kbtbd3        | 4.61E-01 | -2.17E+00 | -1.12 | 0.0059 | -2.83E+01 | 2.83E+01 |
| ENSMUSG00000086369 | E330017L17Rik | 3.69E+00 | 3.69E+00  | 1.88  | 0.0172 | 2.82E+01  | 2.82E+01 |
| ENSMUSG00000105471 | RP23-396K22.3 | 1.77E-01 | -5.64E+00 | -2.50 | 0.0402 | -2.81E+01 | 2.81E+01 |
| ENSMUSG00000101464 | Gm7436        | 4.48E-01 | -2.23E+00 | -1.16 | 0.0063 | -2.81E+01 | 2.81E+01 |
| ENSMUSG00000075588 | Hoxb2         | 4.13E-01 | -2.42E+00 | -1.27 | 0.0074 | -2.80E+01 | 2.80E+01 |
| ENSMUSG00000026573 | Xcl1          | 2.16E-01 | -4.62E+00 | -2.21 | 0.0272 | -2.80E+01 | 2.80E+01 |
| ENSMUSG00000052525 | Spdya         | 2.09E+00 | 2.09E+00  | 1.06  | 0.0056 | 2.80E+01  | 2.80E+01 |
| ENSMUSG00000098093 | Gm8707        | 1.95E-01 | -5.14E+00 | -2.36 | 0.0337 | -2.80E+01 | 2.80E+01 |
| ENSMUSG00000038515 | Grtp1         | 2.91E-01 | -3.44E+00 | -1.78 | 0.0153 | -2.78E+01 | 2.78E+01 |
| ENSMUSG00000097336 | Fendrr        | 4.22E-01 | -2.37E+00 | -1.25 | 0.0073 | -2.77E+01 | 2.77E+01 |
| ENSMUSG00000006369 | Fbln1         | 4.42E-01 | -2.26E+00 | -1.18 | 0.0067 | -2.77E+01 | 2.77E+01 |
| ENSMUSG00000031431 | Tsc22d3       | 2.36E+00 | 2.36E+00  | 1.24  | 0.0073 | 2.77E+01  | 2.77E+01 |
| ENSMUSG00000028024 | Enpep         | 4.91E-01 | -2.04E+00 | -1.03 | 0.0054 | -2.77E+01 | 2.77E+01 |
| ENSMUSG00000038239 | Hrc           | 3.36E-01 | -2.97E+00 | -1.57 | 0.0116 | -2.76E+01 | 2.76E+01 |
| ENSMUSG00000106820 | RP24-544J6.4  | 5.84E+00 | 5.84E+00  | 2.55  | 0.0449 | 2.76E+01  | 2.76E+01 |
| ENSMUSG00000084939 | Gm830         | 2.12E-01 | -4.72E+00 | -2.24 | 0.0292 | -2.76E+01 | 2.76E+01 |
| ENSMUSG00000078722 | Gm12394       | 2.20E+00 | 2.20E+00  | 1.13  | 0.0063 | 2.76E+01  | 2.76E+01 |
| ENSMUSG00000055357 | 4933400A11Rik | 2.25E-01 | -4.45E+00 | -2.15 | 0.0260 | -2.76E+01 | 2.76E+01 |
| ENSMUSG00000031294 | D630029K05Rik | 4.07E-01 | -2.45E+00 | -1.30 | 0.0080 | -2.75E+01 | 2.75E+01 |
| ENSMUSG00000103308 | Gm37800       | 4.44E+00 | 4.44E+00  | 2.15  | 0.0263 | 2.74E+01  | 2.74E+01 |
| ENSMUSG00000102723 | Gm37936       | 2.66E-01 | -3.76E+00 | -1.91 | 0.0189 | -2.74E+01 | 2.74E+01 |
| ENSMUSG00000053117 | E330013P04Rik | 3.54E+00 | 3.54E+00  | 1.83  | 0.0168 | 2.73E+01  | 2.73E+01 |
| ENSMUSG00000051716 | Apon          | 3.69E+00 | 3.69E+00  | 1.88  | 0.0183 | 2.73E+01  | 2.73E+01 |
| ENSMUSG00000103609 | Gm37022       | 4.01E+00 | 4.01E+00  | 2.00  | 0.0216 | 2.73E+01  | 2.73E+01 |
| ENSMUSG00000053835 | H2-T24        | 3.30E-01 | -3.03E+00 | -1.60 | 0.0124 | -2.72E+01 | 2.72E+01 |
| ENSMUSG00000043943 | Naalad2       | 4.81E-01 | -2.08E+00 | -1.05 | 0.0058 | -2.72E+01 | 2.72E+01 |
| ENSMUSG00000016942 | Tmprss6       | 2.66E+00 | 2.66E+00  | 1.41  | 0.0095 | 2.72E+01  | 2.72E+01 |
| ENSMUSG00000087300 | Gm16725       | 2.61E-01 | -3.84E+00 | -1.94 | 0.0200 | -2.71E+01 | 2.71E+01 |
| ENSMUSG00000072878 | 1700123L14Rik | 2.14E-01 | -4.68E+00 | -2.23 | 0.0298 | -2.71E+01 | 2.71E+01 |
| ENSMUSG00000043421 | Hilpda        | 4.65E-01 | -2.15E+00 | -1.10 | 0.0063 | -2.71E+01 | 2.71E+01 |
| ENSMUSG00000024617 | Camk2a        | 3.04E-01 | -3.29E+00 | -1.72 | 0.0148 | -2.71E+01 | 2.71E+01 |
| ENSMUSG00000074628 | Tldc2         | 3.76E+00 | 3.76E+00  | 1.91  | 0.0194 | 2.70E+01  | 2.70E+01 |
| ENSMUSG00000031385 | Plxnb3        | 3.20E+00 | 3.20E+00  | 1.68  | 0.0141 | 2.69E+01  | 2.69E+01 |
| ENSMUSG00000104211 | Gm37985       | 4.88E+00 | 4.88E+00  | 2.29  | 0.0329 | 2.69E+01  | 2.69E+01 |
| ENSMUSG00000073888 | Ccl27a        | 3.12E-01 | -3.21E+00 | -1.68 | 0.0144 | -2.67E+01 | 2.67E+01 |
| ENSMUSG00000048284 | Tas2r126      | 3.00E+00 | 3.00E+00  | 1.58  | 0.0126 | 2.67E+01  | 2.67E+01 |
| ENSMUSG00000032496 | Ltf           | 4.97E+00 | 4.97E+00  | 2.31  | 0.0348 | 2.66E+01  | 2.66E+01 |
| ENSMUSG00000090564 | A430057M04Rik | 5.61E+00 | 5.61E+00  | 2.49  | 0.0444 | 2.66E+01  | 2.66E+01 |
| ENSMUSG00000044026 | Slc35g1       | 2.06E+00 | 2.06E+00  | 1.04  | 0.0060 | 2.66E+01  | 2.66E+01 |
| ENSMUSG00000106417 | RP24-140K12.2 | 3.56E-01 | -2.81E+00 | -1.49 | 0.0112 | -2.66E+01 | 2.66E+01 |
| ENSMUSG00000030114 | Klrg1         | 2.01E-01 | -4.97E+00 | -2.31 | 0.0351 | -2.65E+01 | 2.65E+01 |

|                     |               |          |           |       |        |           |          |
|---------------------|---------------|----------|-----------|-------|--------|-----------|----------|
| ENSMUSG00000030156  | Cd69          | 2.20E+00 | 2.20E+00  | 1.14  | 0.0069 | 2.65E+01  | 2.65E+01 |
| ENSMUSG00000001227  | Sema6b        | 2.40E+00 | 2.40E+00  | 1.26  | 0.0082 | 2.64E+01  | 2.64E+01 |
| ENSMUSG000000042436 | Mfap4         | 3.34E-01 | -2.99E+00 | -1.58 | 0.0129 | -2.64E+01 | 2.64E+01 |
| ENSMUSG000000003199 | Mpnd          | 4.23E-01 | -2.37E+00 | -1.24 | 0.0081 | -2.64E+01 | 2.64E+01 |
| ENSMUSG000000031893 | Tsnaxip1      | 3.20E-01 | -3.12E+00 | -1.64 | 0.0140 | -2.64E+01 | 2.64E+01 |
| ENSMUSG000000085527 | Gm15535       | 2.57E-01 | -3.90E+00 | -1.96 | 0.0220 | -2.63E+01 | 2.63E+01 |
| ENSMUSG000000106212 | RP23-114F4.2  | 4.55E-01 | -2.20E+00 | -1.14 | 0.0070 | -2.62E+01 | 2.62E+01 |
| ENSMUSG000000031150 | Ccdc120       | 2.52E+00 | 2.52E+00  | 1.34  | 0.0093 | 2.62E+01  | 2.62E+01 |
| ENSMUSG000000028883 | Sema3a        | 4.17E-01 | -2.40E+00 | -1.26 | 0.0084 | -2.62E+01 | 2.62E+01 |
| ENSMUSG000000041482 | Piezo2        | 3.05E-01 | -3.28E+00 | -1.71 | 0.0158 | -2.61E+01 | 2.61E+01 |
| ENSMUSG000000104903 | RP23-225M12.2 | 4.89E-01 | -2.05E+00 | -1.03 | 0.0061 | -2.61E+01 | 2.61E+01 |
| ENSMUSG000000079415 | Cntf          | 2.01E+00 | 2.01E+00  | 1.01  | 0.0060 | 2.61E+01  | 2.61E+01 |
| ENSMUSG000000101156 | Gm29114       | 3.96E-01 | -2.52E+00 | -1.34 | 0.0094 | -2.61E+01 | 2.61E+01 |
| ENSMUSG000000100396 | Gm29367       | 2.77E-01 | -3.62E+00 | -1.85 | 0.0193 | -2.61E+01 | 2.61E+01 |
| ENSMUSG00000010841  | 1700006E09Rik | 3.98E+00 | 3.98E+00  | 1.99  | 0.0233 | 2.60E+01  | 2.60E+01 |
| ENSMUSG000000020218 | Wif1          | 3.52E-01 | -2.84E+00 | -1.50 | 0.0119 | -2.60E+01 | 2.60E+01 |
| ENSMUSG000000021773 | Comtd1        | 4.42E-01 | -2.26E+00 | -1.18 | 0.0076 | -2.60E+01 | 2.60E+01 |
| ENSMUSG000000027398 | Il1b          | 2.20E+00 | 2.20E+00  | 1.14  | 0.0072 | 2.60E+01  | 2.60E+01 |
| ENSMUSG000000097387 | 4930563E18Rik | 4.08E+00 | 4.08E+00  | 2.03  | 0.0247 | 2.60E+01  | 2.60E+01 |
| ENSMUSG000000039194 | Rlbp1         | 5.15E+00 | 5.15E+00  | 2.36  | 0.0393 | 2.60E+01  | 2.60E+01 |
| ENSMUSG000000069727 | Gm5595        | 4.37E-01 | -2.29E+00 | -1.19 | 0.0078 | -2.59E+01 | 2.59E+01 |
| ENSMUSG000000104964 | RP24-104D12.2 | 3.90E-01 | -2.57E+00 | -1.36 | 0.0098 | -2.59E+01 | 2.59E+01 |
| ENSMUSG000000078869 | Gm14409       | 2.34E-01 | -4.27E+00 | -2.09 | 0.0272 | -2.59E+01 | 2.59E+01 |
| ENSMUSG000000031519 | Asb5          | 3.26E+00 | 3.26E+00  | 1.70  | 0.0158 | 2.59E+01  | 2.59E+01 |
| ENSMUSG000000039763 | Dnajc28       | 4.13E-01 | -2.42E+00 | -1.28 | 0.0088 | -2.59E+01 | 2.59E+01 |
| ENSMUSG000000033585 | Ndn           | 3.37E-01 | -2.96E+00 | -1.57 | 0.0132 | -2.58E+01 | 2.58E+01 |
| ENSMUSG00000007097  | Atp1a2        | 4.03E-01 | -2.48E+00 | -1.31 | 0.0092 | -2.58E+01 | 2.58E+01 |
| ENSMUSG000000040841 | Six5          | 3.84E-01 | -2.61E+00 | -1.38 | 0.0102 | -2.58E+01 | 2.58E+01 |
| ENSMUSG000000097632 | 4930552P12Rik | 5.00E+00 | 5.00E+00  | 2.32  | 0.0376 | 2.58E+01  | 2.58E+01 |
| ENSMUSG000000042638 | Gucy2c        | 4.63E+00 | 4.63E+00  | 2.21  | 0.0323 | 2.58E+01  | 2.58E+01 |
| ENSMUSG000000040653 | Ppp1r14c      | 4.05E-01 | -2.47E+00 | -1.30 | 0.0092 | -2.58E+01 | 2.58E+01 |
| ENSMUSG000000038695 | Josd2         | 3.59E-01 | -2.79E+00 | -1.48 | 0.0117 | -2.58E+01 | 2.58E+01 |
| ENSMUSG000000048827 | Pkd1l3        | 3.36E+00 | 3.36E+00  | 1.75  | 0.0170 | 2.57E+01  | 2.57E+01 |
| ENSMUSG000000026839 | Upp2          | 2.55E-01 | -3.92E+00 | -1.97 | 0.0233 | -2.57E+01 | 2.57E+01 |
| ENSMUSG000000097325 | Gm16897       | 2.97E+00 | 2.97E+00  | 1.57  | 0.0134 | 2.57E+01  | 2.57E+01 |
| ENSMUSG000000026768 | Itga8         | 3.59E-01 | -2.78E+00 | -1.48 | 0.0118 | -2.56E+01 | 2.56E+01 |
| ENSMUSG000000104876 | Trdc          | 2.50E-01 | -3.99E+00 | -2.00 | 0.0243 | -2.56E+01 | 2.56E+01 |
| ENSMUSG000000080780 | Gm11252       | 2.36E-01 | -4.24E+00 | -2.08 | 0.0276 | -2.55E+01 | 2.55E+01 |
| ENSMUSG000000107234 | RP23-319P12.5 | 4.27E-01 | -2.34E+00 | -1.23 | 0.0084 | -2.55E+01 | 2.55E+01 |
| ENSMUSG000000043664 | Tmem221       | 3.13E-01 | -3.20E+00 | -1.68 | 0.0157 | -2.55E+01 | 2.55E+01 |
| ENSMUSG000000103552 | Gm38217       | 1.81E-01 | -5.52E+00 | -2.46 | 0.0468 | -2.55E+01 | 2.55E+01 |
| ENSMUSG000000086379 | 1700026D11Rik | 3.51E+00 | 3.51E+00  | 1.81  | 0.0190 | 2.55E+01  | 2.55E+01 |
| ENSMUSG00000012405  | Rpl15         | 4.92E-01 | -2.03E+00 | -1.02 | 0.0064 | -2.54E+01 | 2.54E+01 |
| ENSMUSG000000105287 | RP23-282L6.1  | 2.80E-01 | -3.57E+00 | -1.84 | 0.0199 | -2.53E+01 | 2.53E+01 |
| ENSMUSG000000085134 | Gm11659       | 2.33E-01 | -4.30E+00 | -2.10 | 0.0290 | -2.53E+01 | 2.53E+01 |
| ENSMUSG000000022018 | Rgcc          | 3.62E+00 | 3.62E+00  | 1.86  | 0.0205 | 2.53E+01  | 2.53E+01 |
| ENSMUSG000000066677 | Pydc3         | 3.61E-01 | -2.77E+00 | -1.47 | 0.0120 | -2.52E+01 | 2.52E+01 |
| ENSMUSG000000059891 | Tsks          | 4.32E+00 | 4.32E+00  | 2.11  | 0.0293 | 2.52E+01  | 2.52E+01 |
| ENSMUSG000000102524 | Ighv1-2       | 2.37E-01 | -4.22E+00 | -2.08 | 0.0279 | -2.52E+01 | 2.52E+01 |
| ENSMUSG000000029516 | Cit           | 2.45E+00 | 2.45E+00  | 1.29  | 0.0094 | 2.52E+01  | 2.52E+01 |
| ENSMUSG000000046636 | Gm7729        | 1.87E-01 | -5.36E+00 | -2.42 | 0.0457 | -2.51E+01 | 2.51E+01 |
| ENSMUSG000000044338 | Aplnr         | 2.43E-01 | -4.12E+00 | -2.04 | 0.0269 | -2.51E+01 | 2.51E+01 |
| ENSMUSG000000075304 | Sp5           | 3.83E-01 | -2.61E+00 | -1.39 | 0.0109 | -2.50E+01 | 2.50E+01 |
| ENSMUSG000000038264 | Sema7a        | 3.82E+00 | 3.82E+00  | 1.93  | 0.0234 | 2.50E+01  | 2.50E+01 |
| ENSMUSG000000033082 | Clec1a        | 2.31E-01 | -4.33E+00 | -2.11 | 0.0302 | -2.49E+01 | 2.49E+01 |
| ENSMUSG000000049929 | Lpar4         | 3.83E-01 | -2.61E+00 | -1.38 | 0.0110 | -2.49E+01 | 2.49E+01 |
| ENSMUSG000000061210 | Olfra7        | 5.45E+00 | 5.45E+00  | 2.45  | 0.0482 | 2.48E+01  | 2.48E+01 |
| ENSMUSG000000030472 | Ceacam18      | 4.41E+00 | 4.41E+00  | 2.14  | 0.0317 | 2.48E+01  | 2.48E+01 |
| ENSMUSG000000084897 | Gm14226       | 2.83E+00 | 2.83E+00  | 1.50  | 0.0131 | 2.47E+01  | 2.47E+01 |
| ENSMUSG000000104517 | Gm18407       | 5.34E+00 | 5.34E+00  | 2.42  | 0.0465 | 2.47E+01  | 2.47E+01 |
| ENSMUSG000000075416 | Gm14488       | 2.82E+00 | 2.82E+00  | 1.50  | 0.0130 | 2.47E+01  | 2.47E+01 |
| ENSMUSG000000038402 | Foxf2         | 3.90E-01 | -2.56E+00 | -1.36 | 0.0108 | -2.47E+01 | 2.47E+01 |
| ENSMUSG000000030491 | Tdrd12        | 2.71E+00 | 2.71E+00  | 1.44  | 0.0121 | 2.47E+01  | 2.47E+01 |
| ENSMUSG000000073491 | Pydc4         | 3.40E-01 | -2.94E+00 | -1.56 | 0.0142 | -2.47E+01 | 2.47E+01 |
| ENSMUSG000000021567 | Nkd2          | 3.20E-01 | -3.12E+00 | -1.64 | 0.0160 | -2.47E+01 | 2.47E+01 |
| ENSMUSG000000027832 | Ptx3          | 3.12E+00 | 3.12E+00  | 1.64  | 0.0160 | 2.46E+01  | 2.46E+01 |
| ENSMUSG000000093590 | Gm20643       | 2.05E-01 | -4.88E+00 | -2.29 | 0.0392 | -2.46E+01 | 2.46E+01 |

|                     |               |          |           |       |        |           |          |
|---------------------|---------------|----------|-----------|-------|--------|-----------|----------|
| ENSMUSG00000023829  | Slc22a1       | 3.52E-01 | -2.84E+00 | -1.51 | 0.0133 | -2.46E+01 | 2.46E+01 |
| ENSMUSG00000092051  | Gm17229       | 4.57E-01 | -2.19E+00 | -1.13 | 0.0079 | -2.46E+01 | 2.46E+01 |
| ENSMUSG00000007989  | Fzd3          | 4.84E-01 | -2.07E+00 | -1.05 | 0.0071 | -2.46E+01 | 2.46E+01 |
| ENSMUSG00000025082  | Vwa2          | 2.53E-01 | -3.95E+00 | -1.98 | 0.0258 | -2.46E+01 | 2.46E+01 |
| ENSMUSG00000105375  | RP23-397C5.1  | 4.80E+00 | 4.80E+00  | 2.26  | 0.0381 | 2.46E+01  | 2.46E+01 |
| ENSMUSG00000025645  | Ccdc51        | 2.10E+00 | 2.10E+00  | 1.07  | 0.0073 | 2.45E+01  | 2.45E+01 |
| ENSMUSG00000037708  | Spag6l        | 3.45E+00 | 3.45E+00  | 1.79  | 0.0197 | 2.45E+01  | 2.45E+01 |
| ENSMUSG00000078787  | Cyp2t4        | 2.44E+00 | 2.44E+00  | 1.29  | 0.0099 | 2.45E+01  | 2.45E+01 |
| ENSMUSG00000085631  | 9630028H03Rik | 5.21E+00 | 5.21E+00  | 2.38  | 0.0452 | 2.45E+01  | 2.45E+01 |
| ENSMUSG00000085042  | Abhd11os      | 4.20E-01 | -2.38E+00 | -1.25 | 0.0095 | -2.45E+01 | 2.45E+01 |
| ENSMUSG00000092418  | Gm20406       | 2.71E+00 | 2.71E+00  | 1.44  | 0.0123 | 2.44E+01  | 2.44E+01 |
| ENSMUSG00000042804  | Gpr153        | 4.06E-01 | -2.46E+00 | -1.30 | 0.0103 | -2.43E+01 | 2.43E+01 |
| ENSMUSG00000049420  | Tmem200a      | 2.46E-01 | -4.06E+00 | -2.02 | 0.0281 | -2.42E+01 | 2.42E+01 |
| ENSMUSG00000080384  | Gm22105       | 2.86E-01 | -3.50E+00 | -1.81 | 0.0211 | -2.41E+01 | 2.41E+01 |
| ENSMUSG00000032352  | Lrrc1         | 4.99E-01 | -2.00E+00 | -1.00 | 0.0069 | -2.41E+01 | 2.41E+01 |
| ENSMUSG00000019916  | P4ha1         | 4.42E-01 | -2.26E+00 | -1.18 | 0.0088 | -2.40E+01 | 2.40E+01 |
| ENSMUSG00000052767  | Gm12703       | 3.33E+00 | 3.33E+00  | 1.73  | 0.0192 | 2.40E+01  | 2.40E+01 |
| ENSMUSG00000078817  | Nlrp12        | 3.07E+00 | 3.07E+00  | 1.62  | 0.0164 | 2.40E+01  | 2.40E+01 |
| ENSMUSG00000038422  | Hdhd3         | 4.47E-01 | -2.24E+00 | -1.16 | 0.0087 | -2.40E+01 | 2.40E+01 |
| ENSMUSG00000029375  | Cxcl15        | 4.34E-01 | -2.30E+00 | -1.20 | 0.0092 | -2.40E+01 | 2.40E+01 |
| ENSMUSG00000106350  | RP23-307I19.5 | 4.49E+00 | 4.49E+00  | 2.17  | 0.0352 | 2.39E+01  | 2.39E+01 |
| ENSMUSG00000099338  | 2810030D12Rik | 2.28E-01 | -4.39E+00 | -2.14 | 0.0337 | -2.39E+01 | 2.39E+01 |
| ENSMUSG00000106411  | RP23-342M4.6  | 2.88E-01 | -3.47E+00 | -1.79 | 0.0212 | -2.38E+01 | 2.38E+01 |
| ENSMUSG00000072621  | Sifn10-ps     | 2.93E+00 | 2.93E+00  | 1.55  | 0.0151 | 2.38E+01  | 2.38E+01 |
| ENSMUSG00000022240  | Ctnnd2        | 3.76E-01 | -2.66E+00 | -1.41 | 0.0125 | -2.38E+01 | 2.38E+01 |
| ENSMUSG00000102198  | Gm38173       | 3.45E+00 | 3.45E+00  | 1.78  | 0.0210 | 2.38E+01  | 2.38E+01 |
| ENSMUSG00000083505  | Gm7541        | 3.56E+00 | 3.56E+00  | 1.83  | 0.0224 | 2.38E+01  | 2.38E+01 |
| ENSMUSG00000052426  | Gm9877        | 4.03E-01 | -2.48E+00 | -1.31 | 0.0110 | -2.37E+01 | 2.37E+01 |
| ENSMUSG00000020682  | Mmp28         | 3.56E-01 | -2.81E+00 | -1.49 | 0.0141 | -2.37E+01 | 2.37E+01 |
| ENSMUSG00000030790  | Adm           | 2.48E+00 | 2.48E+00  | 1.31  | 0.0110 | 2.36E+01  | 2.36E+01 |
| ENSMUSG00000079001  | 4930404H24Rik | 2.80E-01 | -3.57E+00 | -1.84 | 0.0231 | -2.35E+01 | 2.35E+01 |
| ENSMUSG00000032502  | Stac          | 3.37E-01 | -2.97E+00 | -1.57 | 0.0160 | -2.35E+01 | 2.35E+01 |
| ENSMUSG00000083100  | Gm6044        | 2.75E+00 | 2.75E+00  | 1.46  | 0.0137 | 2.34E+01  | 2.34E+01 |
| ENSMUSG00000104696  | RP23-354G14.1 | 3.35E-01 | -2.99E+00 | -1.58 | 0.0163 | -2.34E+01 | 2.34E+01 |
| ENSMUSG00000070469  | Adamts13      | 3.69E-01 | -2.71E+00 | -1.44 | 0.0134 | -2.34E+01 | 2.34E+01 |
| ENSMUSG00000022941  | Ripply3       | 3.42E-01 | -2.93E+00 | -1.55 | 0.0157 | -2.34E+01 | 2.34E+01 |
| ENSMUSG00000056313  | 1810011010Rik | 2.64E-01 | -3.79E+00 | -1.92 | 0.0264 | -2.33E+01 | 2.33E+01 |
| ENSMUSG00000029602  | Rasal1        | 2.11E-01 | -4.74E+00 | -2.24 | 0.0413 | -2.33E+01 | 2.33E+01 |
| ENSMUSG00000023011  | Faim2         | 3.12E-01 | -3.21E+00 | -1.68 | 0.0189 | -2.33E+01 | 2.33E+01 |
| ENSMUSG00000085883  | Gm3848        | 2.62E-01 | -3.81E+00 | -1.93 | 0.0268 | -2.33E+01 | 2.33E+01 |
| ENSMUSG00000086133  | Gm16331       | 2.70E-01 | -3.70E+00 | -1.89 | 0.0253 | -2.32E+01 | 2.32E+01 |
| ENSMUSG00000097774  | Gm26565       | 4.46E-01 | -2.24E+00 | -1.17 | 0.0093 | -2.32E+01 | 2.32E+01 |
| ENSMUSG00000067928  | Zfp760        | 3.60E-01 | -2.78E+00 | -1.47 | 0.0143 | -2.32E+01 | 2.32E+01 |
| ENSMUSG00000092077  | Olfir101      | 3.43E+00 | 3.43E+00  | 1.78  | 0.0218 | 2.32E+01  | 2.32E+01 |
| ENSMUSG00000082190  | Gm13641       | 2.46E-01 | -4.07E+00 | -2.02 | 0.0307 | -2.32E+01 | 2.32E+01 |
| ENSMUSG00000103748  | Gm38243       | 2.80E-01 | -3.57E+00 | -1.84 | 0.0237 | -2.32E+01 | 2.32E+01 |
| ENSMUSG00000073971  | Olfir554      | 2.84E-01 | -3.52E+00 | -1.81 | 0.0230 | -2.32E+01 | 2.32E+01 |
| ENSMUSG00000106204  | RP24-388K6.6  | 2.59E-01 | -3.86E+00 | -1.95 | 0.0276 | -2.32E+01 | 2.32E+01 |
| ENSMUSG00000106206  | RP23-4P1.2    | 3.96E-01 | -2.53E+00 | -1.34 | 0.0120 | -2.31E+01 | 2.31E+01 |
| ENSMUSG00000047146  | Tet1          | 3.50E-01 | -2.86E+00 | -1.52 | 0.0154 | -2.30E+01 | 2.30E+01 |
| ENSMUSG00000024665  | Fads2         | 3.78E-01 | -2.64E+00 | -1.40 | 0.0132 | -2.30E+01 | 2.30E+01 |
| ENSMUSG00000084192  | Gm13282       | 3.54E+00 | 3.54E+00  | 1.83  | 0.0238 | 2.30E+01  | 2.30E+01 |
| ENSMUSG00000084717  | Gm24630       | 2.04E-01 | -4.90E+00 | -2.29 | 0.0455 | -2.30E+01 | 2.30E+01 |
| ENSMUSG00000030865  | Chp2          | 2.70E-01 | -3.70E+00 | -1.89 | 0.0260 | -2.30E+01 | 2.30E+01 |
| ENSMUSG00000001021  | S100a3        | 2.83E+00 | 2.83E+00  | 1.50  | 0.0152 | 2.30E+01  | 2.30E+01 |
| ENSMUSG000000047037 | Nipa1         | 4.70E-01 | -2.13E+00 | -1.09 | 0.0086 | -2.29E+01 | 2.29E+01 |
| ENSMUSG00000063698  | Sfxn4         | 3.70E-01 | -2.70E+00 | -1.43 | 0.0139 | -2.29E+01 | 2.29E+01 |
| ENSMUSG0000006777   | Krt23         | 3.19E-01 | -3.14E+00 | -1.65 | 0.0188 | -2.29E+01 | 2.29E+01 |
| ENSMUSG00000100090  | Gm29199       | 4.54E-01 | -2.20E+00 | -1.14 | 0.0093 | -2.29E+01 | 2.29E+01 |
| ENSMUSG00000026575  | Nme7          | 4.94E-01 | -2.02E+00 | -1.02 | 0.0078 | -2.29E+01 | 2.29E+01 |
| ENSMUSG00000031138  | F9            | 2.73E-01 | -3.66E+00 | -1.87 | 0.0257 | -2.29E+01 | 2.29E+01 |
| ENSMUSG00000106435  | RP23-131D6.3  | 3.47E+00 | 3.47E+00  | 1.79  | 0.0230 | 2.29E+01  | 2.29E+01 |
| ENSMUSG00000096975  | Gm16386       | 4.36E-01 | -2.29E+00 | -1.20 | 0.0101 | -2.28E+01 | 2.28E+01 |
| ENSMUSG00000073590  | 3222401L13Rik | 4.02E-01 | -2.49E+00 | -1.32 | 0.0119 | -2.28E+01 | 2.28E+01 |
| ENSMUSG00000001334  | Fndc5         | 3.15E-01 | -3.18E+00 | -1.67 | 0.0194 | -2.28E+01 | 2.28E+01 |
| ENSMUSG00000037686  | Aspg          | 3.08E+00 | 3.08E+00  | 1.62  | 0.0183 | 2.28E+01  | 2.28E+01 |
| ENSMUSG00000037754  | Ppp1r16b      | 3.85E-01 | -2.60E+00 | -1.38 | 0.0130 | -2.28E+01 | 2.28E+01 |

|                     |               |          |           |       |        |           |          |
|---------------------|---------------|----------|-----------|-------|--------|-----------|----------|
| ENSMUSG00000072294  | Klf12         | 3.51E-01 | -2.85E+00 | -1.51 | 0.0156 | -2.28E+01 | 2.28E+01 |
| ENSMUSG00000057123  | Gja5          | 2.48E-01 | -4.04E+00 | -2.01 | 0.0315 | -2.27E+01 | 2.27E+01 |
| ENSMUSG00000050541  | Adra1b        | 3.15E-01 | -3.17E+00 | -1.67 | 0.0195 | -2.27E+01 | 2.27E+01 |
| ENSMUSG00000083496  | Gm11263       | 2.11E-01 | -4.73E+00 | -2.24 | 0.0435 | -2.27E+01 | 2.27E+01 |
| ENSMUSG00000033453  | Adamts15      | 3.40E+00 | 3.40E+00  | 1.77  | 0.0225 | 2.27E+01  | 2.27E+01 |
| ENSMUSG00000028347  | Tmeff1        | 4.13E-01 | -2.42E+00 | -1.28 | 0.0115 | -2.26E+01 | 2.26E+01 |
| ENSMUSG00000037892  | Pcdh18        | 3.34E-01 | -3.00E+00 | -1.58 | 0.0175 | -2.26E+01 | 2.26E+01 |
| ENSMUSG00000098016  | Gm9211        | 2.90E+00 | 2.90E+00  | 1.53  | 0.0164 | 2.26E+01  | 2.26E+01 |
| ENSMUSG00000004035  | Gstm7         | 4.66E-01 | -2.15E+00 | -1.10 | 0.0090 | -2.26E+01 | 2.26E+01 |
| ENSMUSG00000047383  | Gm33589       | 3.22E+00 | 3.22E+00  | 1.69  | 0.0203 | 2.26E+01  | 2.26E+01 |
| ENSMUSG00000020577  | Tspan13       | 3.43E-01 | -2.92E+00 | -1.55 | 0.0167 | -2.26E+01 | 2.26E+01 |
| ENSMUSG00000059900  | Tmem40        | 2.39E+00 | 2.39E+00  | 1.26  | 0.0112 | 2.25E+01  | 2.25E+01 |
| ENSMUSG00000066235  | Pomgnt2       | 3.65E-01 | -2.74E+00 | -1.45 | 0.0148 | -2.25E+01 | 2.25E+01 |
| ENSMUSG00000089601  | Gm22094       | 2.84E-01 | -3.53E+00 | -1.82 | 0.0246 | -2.25E+01 | 2.25E+01 |
| ENSMUSG00000101798  | Gm28995       | 2.11E-01 | -4.73E+00 | -2.24 | 0.0444 | -2.25E+01 | 2.25E+01 |
| ENSMUSG00000086707  | Gm12088       | 4.24E+00 | 4.24E+00  | 2.08  | 0.0356 | 2.25E+01  | 2.25E+01 |
| ENSMUSG00000028327  | Stra6l        | 2.15E+00 | 2.15E+00  | 1.11  | 0.0092 | 2.25E+01  | 2.25E+01 |
| ENSMUSG00000045871  | Slitrk6       | 3.53E-01 | -2.83E+00 | -1.50 | 0.0159 | -2.24E+01 | 2.24E+01 |
| ENSMUSG00000063130  | Calml3        | 4.88E-01 | -2.05E+00 | -1.04 | 0.0084 | -2.24E+01 | 2.24E+01 |
| ENSMUSG00000052403  | Fcnaos        | 2.68E+00 | 2.68E+00  | 1.42  | 0.0144 | 2.24E+01  | 2.24E+01 |
| ENSMUSG00000064343  | mt-Tq         | 2.78E-01 | -3.60E+00 | -1.85 | 0.0260 | -2.23E+01 | 2.23E+01 |
| ENSMUSG00000031465  | Angpt2        | 4.62E-01 | -2.16E+00 | -1.11 | 0.0094 | -2.23E+01 | 2.23E+01 |
| ENSMUSG00000033826  | Dnah8         | 2.99E-01 | -3.35E+00 | -1.74 | 0.0225 | -2.23E+01 | 2.23E+01 |
| ENSMUSG00000058260  | Serpina9      | 3.38E-01 | -2.96E+00 | -1.57 | 0.0177 | -2.23E+01 | 2.23E+01 |
| ENSMUSG00000105062  | RP23-114F4.3  | 4.55E-01 | -2.20E+00 | -1.14 | 0.0097 | -2.23E+01 | 2.23E+01 |
| ENSMUSG00000084748  | Gm25289       | 4.75E+00 | 4.75E+00  | 2.25  | 0.0457 | 2.22E+01  | 2.22E+01 |
| ENSMUSG00000019528  | Gyg           | 4.33E-01 | -2.31E+00 | -1.21 | 0.0108 | -2.22E+01 | 2.22E+01 |
| ENSMUSG00000004371  | Il11          | 3.96E+00 | 3.96E+00  | 1.99  | 0.0318 | 2.22E+01  | 2.22E+01 |
| ENSMUSG00000052566  | Hook2         | 2.79E+00 | 2.79E+00  | 1.48  | 0.0159 | 2.22E+01  | 2.22E+01 |
| ENSMUSG00000005973  | Rcn1          | 4.34E-01 | -2.31E+00 | -1.20 | 0.0108 | -2.22E+01 | 2.22E+01 |
| ENSMUSG00000105261  | RP23-102H7.9  | 3.16E+00 | 3.16E+00  | 1.66  | 0.0205 | 2.21E+01  | 2.21E+01 |
| ENSMUSG00000048349  | Pou4f1        | 3.42E-01 | -2.92E+00 | -1.55 | 0.0175 | -2.21E+01 | 2.21E+01 |
| ENSMUSG00000105926  | RP24-176O2.4  | 2.20E+00 | 2.20E+00  | 1.14  | 0.0099 | 2.21E+01  | 2.21E+01 |
| ENSMUSG00000020303  | Stc2          | 4.56E-01 | -2.19E+00 | -1.13 | 0.0099 | -2.21E+01 | 2.21E+01 |
| ENSMUSG000000047528 | Als2cr12      | 3.92E+00 | 3.92E+00  | 1.97  | 0.0316 | 2.21E+01  | 2.21E+01 |
| ENSMUSG00000026473  | Glul          | 2.77E+00 | 2.77E+00  | 1.47  | 0.0158 | 2.21E+01  | 2.21E+01 |
| ENSMUSG00000100764  | Gm29155       | 3.05E+00 | 3.05E+00  | 1.61  | 0.0193 | 2.20E+01  | 2.20E+01 |
| ENSMUSG00000041991  | Hrnr          | 2.71E+00 | 2.71E+00  | 1.44  | 0.0154 | 2.19E+01  | 2.19E+01 |
| ENSMUSG00000030693  | Klk10         | 3.00E-01 | -3.33E+00 | -1.74 | 0.0231 | -2.19E+01 | 2.19E+01 |
| ENSMUSG00000085876  | Gm12409       | 2.65E-01 | -3.77E+00 | -1.92 | 0.0297 | -2.19E+01 | 2.19E+01 |
| ENSMUSG00000062524  | Ncr1          | 2.18E-01 | -4.58E+00 | -2.20 | 0.0438 | -2.19E+01 | 2.19E+01 |
| ENSMUSG00000043488  | Frm8dos       | 3.25E+00 | 3.25E+00  | 1.70  | 0.0221 | 2.19E+01  | 2.19E+01 |
| ENSMUSG00000025196  | Cpn1          | 4.94E-01 | -2.02E+00 | -1.02 | 0.0086 | -2.19E+01 | 2.19E+01 |
| ENSMUSG00000081320  | Gm15034       | 2.60E-01 | -3.85E+00 | -1.94 | 0.0310 | -2.18E+01 | 2.18E+01 |
| ENSMUSG000000091492 | Gm17025       | 2.69E-01 | -3.71E+00 | -1.89 | 0.0291 | -2.18E+01 | 2.18E+01 |
| ENSMUSG00000096847  | Tmem151b      | 4.36E+00 | 4.36E+00  | 2.12  | 0.0403 | 2.17E+01  | 2.17E+01 |
| ENSMUSG00000035407  | Kank4         | 2.25E-01 | -4.45E+00 | -2.15 | 0.0422 | -2.17E+01 | 2.17E+01 |
| ENSMUSG00000037206  | Islr          | 4.67E-01 | -2.14E+00 | -1.10 | 0.0098 | -2.17E+01 | 2.17E+01 |
| ENSMUSG00000036019  | Tmtc2         | 3.54E-01 | -2.82E+00 | -1.50 | 0.0171 | -2.16E+01 | 2.16E+01 |
| ENSMUSG00000003500  | Impdh1        | 3.33E-01 | -3.00E+00 | -1.59 | 0.0193 | -2.16E+01 | 2.16E+01 |
| ENSMUSG00000106498  | RP23-350E1.2  | 3.74E-01 | -2.68E+00 | -1.42 | 0.0154 | -2.16E+01 | 2.16E+01 |
| ENSMUSG00000056468  | 5730596B2ORik | 3.60E-01 | -2.78E+00 | -1.47 | 0.0165 | -2.16E+01 | 2.16E+01 |
| ENSMUSG00000020811  | Wscd1         | 2.89E-01 | -3.45E+00 | -1.79 | 0.0256 | -2.16E+01 | 2.16E+01 |
| ENSMUSG00000107264  | AC127262.1    | 2.42E-01 | -4.13E+00 | -2.05 | 0.0366 | -2.16E+01 | 2.16E+01 |
| ENSMUSG00000066842  | Hmcn1         | 3.42E-01 | -2.93E+00 | -1.55 | 0.0184 | -2.16E+01 | 2.16E+01 |
| ENSMUSG00000031576  | Kcnu1         | 3.49E+00 | 3.49E+00  | 1.80  | 0.0263 | 2.15E+01  | 2.15E+01 |
| ENSMUSG000000076473 | Trbv16        | 3.02E-01 | -3.31E+00 | -1.73 | 0.0236 | -2.15E+01 | 2.15E+01 |
| ENSMUSG00000038194  | Lhb           | 4.22E-01 | -2.37E+00 | -1.24 | 0.0121 | -2.15E+01 | 2.15E+01 |
| ENSMUSG00000032377  | Plscr4        | 3.48E-01 | -2.88E+00 | -1.52 | 0.0179 | -2.15E+01 | 2.15E+01 |
| ENSMUSG00000085633  | Bloc1s6os     | 3.04E+00 | 3.04E+00  | 1.60  | 0.0201 | 2.14E+01  | 2.14E+01 |
| ENSMUSG00000072972  | Adam4         | 2.64E-01 | -3.79E+00 | -1.92 | 0.0313 | -2.14E+01 | 2.14E+01 |
| ENSMUSG00000022615  | Tymp          | 3.46E-01 | -2.89E+00 | -1.53 | 0.0182 | -2.14E+01 | 2.14E+01 |
| ENSMUSG00000072974  | Gm4787        | 2.82E-01 | -3.55E+00 | -1.83 | 0.0274 | -2.14E+01 | 2.14E+01 |
| ENSMUSG00000103811  | Gm38004       | 2.78E+00 | 2.78E+00  | 1.47  | 0.0168 | 2.14E+01  | 2.14E+01 |
| ENSMUSG00000038539  | Atf5          | 4.44E-01 | -2.25E+00 | -1.17 | 0.0111 | -2.14E+01 | 2.14E+01 |
| ENSMUSG00000019647  | Sema6a        | 2.92E-01 | -3.43E+00 | -1.78 | 0.0257 | -2.14E+01 | 2.14E+01 |
| ENSMUSG00000044206  | Vsig4         | 4.15E+00 | 4.15E+00  | 2.05  | 0.0377 | 2.13E+01  | 2.13E+01 |

|                    |               |          |           |       |        |           |          |
|--------------------|---------------|----------|-----------|-------|--------|-----------|----------|
| ENSMUSG00000020312 | Shc2          | 3.92E-01 | -2.55E+00 | -1.35 | 0.0143 | -2.13E+01 | 2.13E+01 |
| ENSMUSG00000032034 | Kcnj5         | 4.14E-01 | -2.41E+00 | -1.27 | 0.0128 | -2.13E+01 | 2.13E+01 |
| ENSMUSG00000071042 | Rasgrp3       | 3.83E-01 | -2.61E+00 | -1.39 | 0.0150 | -2.13E+01 | 2.13E+01 |
| ENSMUSG00000052957 | Gas1          | 4.25E-01 | -2.36E+00 | -1.24 | 0.0122 | -2.13E+01 | 2.13E+01 |
| ENSMUSG00000104869 | RP23-54L16.2  | 3.72E+00 | 3.72E+00  | 1.89  | 0.0305 | 2.13E+01  | 2.13E+01 |
| ENSMUSG00000026656 | Fcgr2b        | 3.62E+00 | 3.62E+00  | 1.86  | 0.0289 | 2.13E+01  | 2.13E+01 |
| ENSMUSG00000097332 | 2610020F03Rik | 2.41E-01 | -4.15E+00 | -2.05 | 0.0381 | -2.13E+01 | 2.13E+01 |
| ENSMUSG00000079669 | Gm17396       | 4.17E-01 | -2.40E+00 | -1.26 | 0.0127 | -2.12E+01 | 2.12E+01 |
| ENSMUSG00000026394 | Atp6v1g3      | 2.69E-01 | -3.71E+00 | -1.89 | 0.0305 | -2.12E+01 | 2.12E+01 |
| ENSMUSG00000026456 | Cyb5r1        | 3.93E-01 | -2.55E+00 | -1.35 | 0.0144 | -2.12E+01 | 2.12E+01 |
| ENSMUSG00000103732 | Gm38315       | 3.75E-01 | -2.67E+00 | -1.42 | 0.0158 | -2.12E+01 | 2.12E+01 |
| ENSMUSG00000097612 | Gm26509       | 2.43E-01 | -4.11E+00 | -2.04 | 0.0375 | -2.12E+01 | 2.12E+01 |
| ENSMUSG00000070331 | Qrich2        | 4.10E+00 | 4.10E+00  | 2.04  | 0.0374 | 2.12E+01  | 2.12E+01 |
| ENSMUSG00000076490 | Trbc1         | 4.90E-01 | -2.04E+00 | -1.03 | 0.0093 | -2.12E+01 | 2.12E+01 |
| ENSMUSG00000089437 | Gm23199       | 4.95E-01 | -2.02E+00 | -1.01 | 0.0091 | -2.12E+01 | 2.12E+01 |
| ENSMUSG00000029211 | Gabra4        | 3.63E-01 | -2.76E+00 | -1.46 | 0.0170 | -2.12E+01 | 2.12E+01 |
| ENSMUSG00000030465 | Psd3          | 4.24E-01 | -2.36E+00 | -1.24 | 0.0125 | -2.11E+01 | 2.11E+01 |
| ENSMUSG00000020598 | Nrcam         | 2.19E-01 | -4.56E+00 | -2.19 | 0.0466 | -2.11E+01 | 2.11E+01 |
| ENSMUSG00000023132 | Gzma          | 2.21E-01 | -4.53E+00 | -2.18 | 0.0461 | -2.11E+01 | 2.11E+01 |
| ENSMUSG00000033508 | Asprv1        | 3.77E+00 | 3.77E+00  | 1.91  | 0.0319 | 2.11E+01  | 2.11E+01 |
| ENSMUSG00000046818 | Ddit4l        | 4.70E-01 | -2.13E+00 | -1.09 | 0.0102 | -2.11E+01 | 2.11E+01 |
| ENSMUSG00000009900 | Wnt3a         | 3.91E-01 | -2.56E+00 | -1.36 | 0.0147 | -2.11E+01 | 2.11E+01 |
| ENSMUSG00000047798 | Cd300lf       | 3.84E+00 | 3.84E+00  | 1.94  | 0.0333 | 2.11E+01  | 2.11E+01 |
| ENSMUSG00000042289 | Hsd3b7        | 4.12E-01 | -2.43E+00 | -1.28 | 0.0134 | -2.10E+01 | 2.10E+01 |
| ENSMUSG00000097681 | Gm26643       | 2.67E+00 | 2.67E+00  | 1.42  | 0.0162 | 2.10E+01  | 2.10E+01 |
| ENSMUSG00000087690 | Gm16031       | 3.30E-01 | -3.03E+00 | -1.60 | 0.0210 | -2.09E+01 | 2.09E+01 |
| ENSMUSG00000063522 | 2010109I03Rik | 3.17E+00 | 3.17E+00  | 1.66  | 0.0230 | 2.09E+01  | 2.09E+01 |
| ENSMUSG00000041594 | Tmtc4         | 3.15E-01 | -3.17E+00 | -1.67 | 0.0231 | -2.09E+01 | 2.09E+01 |
| ENSMUSG00000037982 | Gm9725        | 2.93E+00 | 2.93E+00  | 1.55  | 0.0198 | 2.08E+01  | 2.08E+01 |
| ENSMUSG00000019256 | Ahr           | 4.06E-01 | -2.46E+00 | -1.30 | 0.0140 | -2.08E+01 | 2.08E+01 |
| ENSMUSG00000031877 | Ces2g         | 4.07E-01 | -2.46E+00 | -1.30 | 0.0139 | -2.08E+01 | 2.08E+01 |
| ENSMUSG00000103002 | Gm38075       | 4.49E-01 | -2.23E+00 | -1.16 | 0.0115 | -2.08E+01 | 2.08E+01 |
| ENSMUSG00000063681 | Crb1          | 3.12E-01 | -3.20E+00 | -1.68 | 0.0237 | -2.08E+01 | 2.08E+01 |
| ENSMUSG00000097303 | 3110083C13Rik | 2.70E-01 | -3.71E+00 | -1.89 | 0.0319 | -2.08E+01 | 2.08E+01 |
| ENSMUSG00000035615 | Frmpd1        | 3.30E-01 | -3.03E+00 | -1.60 | 0.0212 | -2.08E+01 | 2.08E+01 |
| ENSMUSG00000081731 | Calr-ps       | 4.91E-01 | -2.04E+00 | -1.03 | 0.0096 | -2.07E+01 | 2.07E+01 |
| ENSMUSG00000049872 | Fam26e        | 3.95E-01 | -2.53E+00 | -1.34 | 0.0149 | -2.07E+01 | 2.07E+01 |
| ENSMUSG00000052212 | Cd177         | 3.06E+00 | 3.06E+00  | 1.62  | 0.0219 | 2.07E+01  | 2.07E+01 |
| ENSMUSG00000037913 | Tmem156       | 3.40E+00 | 3.40E+00  | 1.77  | 0.0271 | 2.07E+01  | 2.07E+01 |
| ENSMUSG00000047631 | Apof          | 3.40E+00 | 3.40E+00  | 1.76  | 0.0270 | 2.07E+01  | 2.07E+01 |
| ENSMUSG00000105512 | RP23-199B2.8  | 3.45E+00 | 3.45E+00  | 1.79  | 0.0279 | 2.06E+01  | 2.06E+01 |
| ENSMUSG00000027442 | Cst8          | 2.21E-01 | -4.52E+00 | -2.18 | 0.0482 | -2.06E+01 | 2.06E+01 |
| ENSMUSG00000030357 | Fkbp4         | 4.72E-01 | -2.12E+00 | -1.08 | 0.0106 | -2.06E+01 | 2.06E+01 |
| ENSMUSG00000097756 | A730056A06Rik | 2.70E-01 | -3.71E+00 | -1.89 | 0.0325 | -2.06E+01 | 2.06E+01 |
| ENSMUSG00000031489 | Adrb3         | 2.65E-01 | -3.77E+00 | -1.92 | 0.0338 | -2.05E+01 | 2.05E+01 |
| ENSMUSG00000098708 | Gm27252       | 3.86E+00 | 3.86E+00  | 1.95  | 0.0354 | 2.05E+01  | 2.05E+01 |
| ENSMUSG00000099879 | Gm29123       | 3.66E+00 | 3.66E+00  | 1.87  | 0.0321 | 2.04E+01  | 2.04E+01 |
| ENSMUSG00000031444 | F10           | 2.49E+00 | 2.49E+00  | 1.32  | 0.0149 | 2.04E+01  | 2.04E+01 |
| ENSMUSG00000083500 | Gm15470       | 3.83E-01 | -2.61E+00 | -1.38 | 0.0163 | -2.04E+01 | 2.04E+01 |
| ENSMUSG00000070527 | Mkrn3         | 4.18E-01 | -2.39E+00 | -1.26 | 0.0137 | -2.04E+01 | 2.04E+01 |
| ENSMUSG00000016327 | Atp1b4        | 4.04E+00 | 4.04E+00  | 2.01  | 0.0393 | 2.04E+01  | 2.04E+01 |
| ENSMUSG00000047959 | Kcna3         | 4.62E-01 | -2.16E+00 | -1.11 | 0.0113 | -2.04E+01 | 2.04E+01 |
| ENSMUSG00000086952 | Gm12596       | 3.21E+00 | 3.21E+00  | 1.68  | 0.0248 | 2.04E+01  | 2.04E+01 |
| ENSMUSG00000100522 | Gm19280       | 2.56E+00 | 2.56E+00  | 1.35  | 0.0158 | 2.03E+01  | 2.03E+01 |
| ENSMUSG00000051599 | Pcdhb2        | 2.85E-01 | -3.51E+00 | -1.81 | 0.0299 | -2.03E+01 | 2.03E+01 |
| ENSMUSG00000089242 | Gm24056       | 2.25E-01 | -4.45E+00 | -2.15 | 0.0481 | -2.03E+01 | 2.03E+01 |
| ENSMUSG00000044986 | Tst           | 3.95E-01 | -2.53E+00 | -1.34 | 0.0157 | -2.02E+01 | 2.02E+01 |
| ENSMUSG00000048728 | Zfp454        | 2.45E-01 | -4.08E+00 | -2.03 | 0.0406 | -2.02E+01 | 2.02E+01 |
| ENSMUSG00000081217 | Gm15268       | 3.18E-01 | -3.14E+00 | -1.65 | 0.0242 | -2.02E+01 | 2.02E+01 |
| ENSMUSG00000105228 | RP23-180G16.2 | 4.29E+00 | 4.29E+00  | 2.10  | 0.0451 | 2.02E+01  | 2.02E+01 |
| ENSMUSG00000097021 | 4933433G15Rik | 4.30E+00 | 4.30E+00  | 2.10  | 0.0453 | 2.02E+01  | 2.02E+01 |
| ENSMUSG00000030084 | Plxna1        | 4.93E-01 | -2.03E+00 | -1.02 | 0.0101 | -2.02E+01 | 2.02E+01 |
| ENSMUSG00000082508 | Rpl15-ps4     | 2.30E-01 | -4.35E+00 | -2.12 | 0.0464 | -2.02E+01 | 2.02E+01 |
| ENSMUSG00000032890 | Rims3         | 3.29E+00 | 3.29E+00  | 1.72  | 0.0267 | 2.01E+01  | 2.01E+01 |
| ENSMUSG00000104626 | RP23-10F17.4  | 3.91E-01 | -2.56E+00 | -1.36 | 0.0161 | -2.01E+01 | 2.01E+01 |
| ENSMUSG00000041596 | Nlrp5-ps      | 3.58E-01 | -2.79E+00 | -1.48 | 0.0193 | -2.01E+01 | 2.01E+01 |
| ENSMUSG00000025197 | Cyp2c44       | 2.23E-01 | -4.48E+00 | -2.16 | 0.0497 | -2.01E+01 | 2.01E+01 |

|                    |               |          |           |       |        |           |          |
|--------------------|---------------|----------|-----------|-------|--------|-----------|----------|
| ENSMUSG00000107216 | RP23-353L10.2 | 3.64E-01 | -2.75E+00 | -1.46 | 0.0187 | -2.01E+01 | 2.01E+01 |
| ENSMUSG00000107148 | RP23-114M24.1 | 4.20E-01 | -2.38E+00 | -1.25 | 0.0140 | -2.01E+01 | 2.01E+01 |
| ENSMUSG00000030641 | Ddias         | 4.22E+00 | 4.22E+00  | 2.08  | 0.0441 | 2.01E+01  | 2.01E+01 |
| ENSMUSG00000068270 | Shroom4       | 4.92E-01 | -2.03E+00 | -1.02 | 0.0102 | -2.01E+01 | 2.01E+01 |
| ENSMUSG00000054477 | Kcnn2         | 2.91E-01 | -3.43E+00 | -1.78 | 0.0293 | -2.00E+01 | 2.00E+01 |
| ENSMUSG00000025582 | Nptx1         | 3.95E-01 | -2.53E+00 | -1.34 | 0.0160 | -2.00E+01 | 2.00E+01 |
| ENSMUSG00000043631 | Ecm2          | 3.11E-01 | -3.22E+00 | -1.69 | 0.0259 | -2.00E+01 | 2.00E+01 |
| ENSMUSG00000102700 | Gm38312       | 3.86E-01 | -2.59E+00 | -1.37 | 0.0168 | -2.00E+01 | 2.00E+01 |
| ENSMUSG00000090124 | Ugt1a7c       | 2.05E+00 | 2.05E+00  | 1.04  | 0.0106 | 2.00E+01  | 2.00E+01 |
| ENSMUSG00000074340 | Ovgp1         | 4.23E+00 | 4.23E+00  | 2.08  | 0.0450 | 1.99E+01  | 1.99E+01 |
| ENSMUSG00000089712 | Gm15889       | 2.72E+00 | 2.72E+00  | 1.45  | 0.0187 | 1.99E+01  | 1.99E+01 |
| ENSMUSG00000027954 | Efna1         | 4.55E-01 | -2.20E+00 | -1.14 | 0.0123 | -1.98E+01 | 1.98E+01 |
| ENSMUSG00000031698 | Mylk3         | 3.08E-01 | -3.24E+00 | -1.70 | 0.0269 | -1.98E+01 | 1.98E+01 |
| ENSMUSG00000084755 | Gm16276       | 2.57E-01 | -3.89E+00 | -1.96 | 0.0388 | -1.97E+01 | 1.97E+01 |
| ENSMUSG00000107312 | RP23-319P12.1 | 4.07E-01 | -2.45E+00 | -1.30 | 0.0155 | -1.97E+01 | 1.97E+01 |
| ENSMUSG00000087721 | Gm26280       | 3.84E-01 | -2.61E+00 | -1.38 | 0.0175 | -1.97E+01 | 1.97E+01 |
| ENSMUSG00000055313 | Pgbd1         | 3.63E-01 | -2.75E+00 | -1.46 | 0.0196 | -1.97E+01 | 1.97E+01 |
| ENSMUSG00000030302 | Atp2b2        | 3.91E-01 | -2.56E+00 | -1.35 | 0.0169 | -1.97E+01 | 1.97E+01 |
| ENSMUSG00000025578 | Cbx8          | 3.82E-01 | -2.62E+00 | -1.39 | 0.0177 | -1.97E+01 | 1.97E+01 |
| ENSMUSG00000059588 | Calcr1        | 2.93E-01 | -3.41E+00 | -1.77 | 0.0302 | -1.97E+01 | 1.97E+01 |
| ENSMUSG00000102277 | A130050O07Rik | 4.13E-01 | -2.42E+00 | -1.27 | 0.0152 | -1.97E+01 | 1.97E+01 |
| ENSMUSG00000022220 | Adcy4         | 3.75E-01 | -2.66E+00 | -1.41 | 0.0184 | -1.96E+01 | 1.96E+01 |
| ENSMUSG00000026640 | Plxna2        | 2.99E+00 | 2.99E+00  | 1.58  | 0.0231 | 1.96E+01  | 1.96E+01 |
| ENSMUSG00000059791 | Nrm           | 2.61E+00 | 2.61E+00  | 1.38  | 0.0176 | 1.96E+01  | 1.96E+01 |
| ENSMUSG00000097884 | Gm26543       | 2.68E-01 | -3.74E+00 | -1.90 | 0.0362 | -1.96E+01 | 1.96E+01 |
| ENSMUSG00000100825 | ltpa-ps2      | 2.98E-01 | -3.35E+00 | -1.75 | 0.0293 | -1.96E+01 | 1.96E+01 |
| ENSMUSG00000028678 | Kif2c         | 2.31E+00 | 2.31E+00  | 1.21  | 0.0140 | 1.96E+01  | 1.96E+01 |
| ENSMUSG00000078532 | Nkain1        | 3.36E-01 | -2.98E+00 | -1.57 | 0.0233 | -1.95E+01 | 1.95E+01 |
| ENSMUSG00000019893 | Ros1          | 2.79E-01 | -3.59E+00 | -1.84 | 0.0338 | -1.95E+01 | 1.95E+01 |
| ENSMUSG00000106107 | RP23-381G13.3 | 3.38E+00 | 3.38E+00  | 1.76  | 0.0300 | 1.95E+01  | 1.95E+01 |
| ENSMUSG00000105156 | RP23-258C13.1 | 2.89E-01 | -3.46E+00 | -1.79 | 0.0315 | -1.95E+01 | 1.95E+01 |
| ENSMUSG00000030116 | Mfap5         | 4.49E-01 | -2.22E+00 | -1.15 | 0.0131 | -1.94E+01 | 1.94E+01 |
| ENSMUSG00000087013 | 2610027K06Rik | 4.35E-01 | -2.30E+00 | -1.20 | 0.0140 | -1.94E+01 | 1.94E+01 |
| ENSMUSG00000042988 | Notum         | 3.69E-01 | -2.71E+00 | -1.44 | 0.0195 | -1.94E+01 | 1.94E+01 |
| ENSMUSG00000011154 | 1700026D08Rik | 3.99E-01 | -2.50E+00 | -1.32 | 0.0166 | -1.94E+01 | 1.94E+01 |
| ENSMUSG00000034487 | Kdelc2        | 4.73E-01 | -2.12E+00 | -1.08 | 0.0119 | -1.94E+01 | 1.94E+01 |
| ENSMUSG00000074780 | Anapc15-ps    | 2.07E+00 | 2.07E+00  | 1.05  | 0.0114 | 1.94E+01  | 1.94E+01 |
| ENSMUSG00000102232 | Gm19035       | 2.82E-01 | -3.55E+00 | -1.83 | 0.0336 | -1.94E+01 | 1.94E+01 |
| ENSMUSG00000100876 | 2810454H06Rik | 2.07E+00 | 2.07E+00  | 1.05  | 0.0114 | 1.94E+01  | 1.94E+01 |
| ENSMUSG00000044244 | Il20rb        | 3.55E+00 | 3.55E+00  | 1.83  | 0.0335 | 1.94E+01  | 1.94E+01 |
| ENSMUSG00000041912 | Tdrkh         | 3.45E-01 | -2.89E+00 | -1.53 | 0.0223 | -1.94E+01 | 1.94E+01 |
| ENSMUSG00000086418 | Gm13362       | 3.40E-01 | -2.94E+00 | -1.56 | 0.0230 | -1.94E+01 | 1.94E+01 |
| ENSMUSG00000087575 | Gm12976       | 4.17E+00 | 4.17E+00  | 2.06  | 0.0465 | 1.93E+01  | 1.93E+01 |
| ENSMUSG00000104835 | RP24-500I24.7 | 2.37E+00 | 2.37E+00  | 1.24  | 0.0150 | 1.93E+01  | 1.93E+01 |
| ENSMUSG00000039004 | Bmp6          | 3.35E-01 | -2.99E+00 | -1.58 | 0.0240 | -1.93E+01 | 1.93E+01 |
| ENSMUSG00000030979 | Uros          | 4.24E-01 | -2.36E+00 | -1.24 | 0.0150 | -1.93E+01 | 1.93E+01 |
| ENSMUSG00000042379 | Esm1          | 4.86E-01 | -2.06E+00 | -1.04 | 0.0114 | -1.93E+01 | 1.93E+01 |
| ENSMUSG00000071104 | Ccdc110       | 4.72E-01 | -2.12E+00 | -1.08 | 0.0121 | -1.92E+01 | 1.92E+01 |
| ENSMUSG00000102494 | Gm36988       | 3.46E-01 | -2.89E+00 | -1.53 | 0.0226 | -1.92E+01 | 1.92E+01 |
| ENSMUSG00000027797 | Dclk1         | 4.38E-01 | -2.28E+00 | -1.19 | 0.0141 | -1.92E+01 | 1.92E+01 |
| ENSMUSG00000040724 | Kcna2         | 3.80E-01 | -2.63E+00 | -1.40 | 0.0188 | -1.92E+01 | 1.92E+01 |
| ENSMUSG00000097146 | Gm4211        | 2.01E+00 | 2.01E+00  | 1.01  | 0.0109 | 1.92E+01  | 1.92E+01 |
| ENSMUSG00000046971 | Pla2g4f       | 4.12E-01 | -2.43E+00 | -1.28 | 0.0159 | -1.92E+01 | 1.92E+01 |
| ENSMUSG00000031292 | Cdkl5         | 4.09E-01 | -2.44E+00 | -1.29 | 0.0162 | -1.92E+01 | 1.92E+01 |
| ENSMUSG00000103791 | Gm38095       | 3.35E-01 | -2.98E+00 | -1.58 | 0.0242 | -1.92E+01 | 1.92E+01 |
| ENSMUSG00000024990 | Rbp4          | 4.60E-01 | -2.17E+00 | -1.12 | 0.0129 | -1.91E+01 | 1.91E+01 |
| ENSMUSG00000102249 | 4930423C22Rik | 2.50E-01 | -4.00E+00 | -2.00 | 0.0439 | -1.91E+01 | 1.91E+01 |
| ENSMUSG00000015001 | Oc90          | 4.15E+00 | 4.15E+00  | 2.05  | 0.0473 | 1.91E+01  | 1.91E+01 |
| ENSMUSG00000070336 | Fbxo47        | 2.45E+00 | 2.45E+00  | 1.29  | 0.0165 | 1.91E+01  | 1.91E+01 |
| ENSMUSG00000093485 | Gm20708       | 2.41E+00 | 2.41E+00  | 1.27  | 0.0159 | 1.91E+01  | 1.91E+01 |
| ENSMUSG00000089989 | Flt3l         | 4.98E-01 | -2.01E+00 | -1.01 | 0.0111 | -1.90E+01 | 1.90E+01 |
| ENSMUSG00000034579 | Pla2g3        | 3.84E+00 | 3.84E+00  | 1.94  | 0.0407 | 1.90E+01  | 1.90E+01 |
| ENSMUSG00000086863 | Gm15543       | 2.49E-01 | -4.02E+00 | -2.01 | 0.0447 | -1.90E+01 | 1.90E+01 |
| ENSMUSG00000080878 | Gm15618       | 2.99E-01 | -3.34E+00 | -1.74 | 0.0309 | -1.90E+01 | 1.90E+01 |
| ENSMUSG00000064215 | Ifi27         | 4.97E-01 | -2.01E+00 | -1.01 | 0.0112 | -1.90E+01 | 1.90E+01 |
| ENSMUSG00000046719 | Nxph3         | 4.25E-01 | -2.35E+00 | -1.24 | 0.0154 | -1.90E+01 | 1.90E+01 |
| ENSMUSG00000074743 | Thbd          | 3.99E-01 | -2.50E+00 | -1.32 | 0.0174 | -1.90E+01 | 1.90E+01 |

|                    |                |          |           |       |        |           |          |
|--------------------|----------------|----------|-----------|-------|--------|-----------|----------|
| ENSMUSG0000000794  | Kcnn3          | 4.66E-01 | -2.14E+00 | -1.10 | 0.0129 | -1.89E+01 | 1.89E+01 |
| ENSMUSG00000022048 | Dpysl2         | 3.85E-01 | -2.60E+00 | -1.38 | 0.0189 | -1.89E+01 | 1.89E+01 |
| ENSMUSG00000040037 | Negr1          | 3.74E-01 | -2.68E+00 | -1.42 | 0.0202 | -1.89E+01 | 1.89E+01 |
| ENSMUSG00000064063 | BC048507       | 4.36E-01 | -2.30E+00 | -1.20 | 0.0148 | -1.88E+01 | 1.88E+01 |
| ENSMUSG00000016918 | Sulf1          | 3.94E-01 | -2.54E+00 | -1.34 | 0.0182 | -1.88E+01 | 1.88E+01 |
| ENSMUSG00000096145 | Vkorc1         | 4.64E-01 | -2.16E+00 | -1.11 | 0.0132 | -1.87E+01 | 1.87E+01 |
| ENSMUSG00000035829 | Ppp1r26        | 3.98E-01 | -2.51E+00 | -1.33 | 0.0180 | -1.87E+01 | 1.87E+01 |
| ENSMUSG00000014846 | Tppp3          | 3.53E-01 | -2.83E+00 | -1.50 | 0.0229 | -1.87E+01 | 1.87E+01 |
| ENSMUSG00000050762 | Prss27         | 2.29E+00 | 2.29E+00  | 1.20  | 0.0151 | 1.87E+01  | 1.87E+01 |
| ENSMUSG00000005540 | Fcer2a         | 2.81E-01 | -3.56E+00 | -1.83 | 0.0362 | -1.87E+01 | 1.87E+01 |
| ENSMUSG00000051705 | Senp8          | 2.57E-01 | -3.88E+00 | -1.96 | 0.0431 | -1.87E+01 | 1.87E+01 |
| ENSMUSG00000057286 | St6galnac2     | 4.02E-01 | -2.49E+00 | -1.32 | 0.0178 | -1.87E+01 | 1.87E+01 |
| ENSMUSG00000098837 | Gm20111        | 3.50E-01 | -2.86E+00 | -1.52 | 0.0235 | -1.87E+01 | 1.87E+01 |
| ENSMUSG00000059027 | 9630013D21Rik  | 3.79E-01 | -2.64E+00 | -1.40 | 0.0200 | -1.86E+01 | 1.86E+01 |
| ENSMUSG00000087060 | Eldr           | 3.33E-01 | -3.00E+00 | -1.59 | 0.0260 | -1.86E+01 | 1.86E+01 |
| ENSMUSG00000101671 | Gm28221        | 4.81E-01 | -2.08E+00 | -1.06 | 0.0125 | -1.86E+01 | 1.86E+01 |
| ENSMUSG00000069184 | Zfp72          | 3.25E-01 | -3.07E+00 | -1.62 | 0.0274 | -1.86E+01 | 1.86E+01 |
| ENSMUSG00000081992 | Gm13408        | 3.16E-01 | -3.17E+00 | -1.66 | 0.0292 | -1.86E+01 | 1.86E+01 |
| ENSMUSG00000101716 | Gm12057        | 2.22E+00 | 2.22E+00  | 1.15  | 0.0144 | 1.85E+01  | 1.85E+01 |
| ENSMUSG00000024430 | Cabyr          | 2.39E+00 | 2.39E+00  | 1.26  | 0.0167 | 1.85E+01  | 1.85E+01 |
| ENSMUSG00000059810 | Rgs3           | 4.47E-01 | -2.24E+00 | -1.16 | 0.0146 | -1.85E+01 | 1.85E+01 |
| ENSMUSG00000068638 | 4930403O15Rik  | 4.86E-01 | -2.06E+00 | -1.04 | 0.0124 | -1.85E+01 | 1.85E+01 |
| ENSMUSG00000078816 | Prkcg          | 4.13E+00 | 4.13E+00  | 2.05  | 0.0498 | 1.85E+01  | 1.85E+01 |
| ENSMUSG00000028185 | Dnase2b        | 3.45E-01 | -2.90E+00 | -1.54 | 0.0245 | -1.85E+01 | 1.85E+01 |
| ENSMUSG00000039133 | 9330171B17Rik  | 4.45E-01 | -2.25E+00 | -1.17 | 0.0147 | -1.85E+01 | 1.85E+01 |
| ENSMUSG00000022993 | 4930415O20Rik  | 2.82E+00 | 2.82E+00  | 1.49  | 0.0232 | 1.85E+01  | 1.85E+01 |
| ENSMUSG00000014776 | Nol3           | 4.41E-01 | -2.27E+00 | -1.18 | 0.0150 | -1.85E+01 | 1.85E+01 |
| ENSMUSG00000022346 | Myc            | 2.14E+00 | 2.14E+00  | 1.10  | 0.0134 | 1.85E+01  | 1.85E+01 |
| ENSMUSG00000032374 | Plod2          | 4.81E-01 | -2.08E+00 | -1.06 | 0.0127 | -1.84E+01 | 1.84E+01 |
| ENSMUSG00000081496 | Gm13428        | 3.82E+00 | 3.82E+00  | 1.93  | 0.0430 | 1.84E+01  | 1.84E+01 |
| ENSMUSG00000060227 | Casc4          | 4.42E-01 | -2.26E+00 | -1.18 | 0.0151 | -1.84E+01 | 1.84E+01 |
| ENSMUSG00000052544 | St6galnac3     | 4.40E-01 | -2.28E+00 | -1.19 | 0.0153 | -1.84E+01 | 1.84E+01 |
| ENSMUSG00000021186 | Fbln5          | 4.70E-01 | -2.13E+00 | -1.09 | 0.0134 | -1.84E+01 | 1.84E+01 |
| ENSMUSG00000096606 | Gm4980         | 3.20E+00 | 3.20E+00  | 1.68  | 0.0303 | 1.84E+01  | 1.84E+01 |
| ENSMUSG00000106244 | RP23-187D22.10 | 4.08E-01 | -2.45E+00 | -1.29 | 0.0178 | -1.83E+01 | 1.83E+01 |
| ENSMUSG00000032036 | Kirrel3        | 2.33E+00 | 2.33E+00  | 1.22  | 0.0162 | 1.83E+01  | 1.83E+01 |
| ENSMUSG00000021835 | Bmp4           | 4.50E-01 | -2.22E+00 | -1.15 | 0.0148 | -1.83E+01 | 1.83E+01 |
| ENSMUSG00000056203 | Tas2r135       | 3.03E+00 | 3.03E+00  | 1.60  | 0.0274 | 1.83E+01  | 1.83E+01 |
| ENSMUSG00000085689 | Gm16838        | 2.48E+00 | 2.48E+00  | 1.31  | 0.0184 | 1.83E+01  | 1.83E+01 |
| ENSMUSG00000087213 | 2810408I11Rik  | 3.76E+00 | 3.76E+00  | 1.91  | 0.0423 | 1.83E+01  | 1.83E+01 |
| ENSMUSG00000073753 | Gm10571        | 2.43E+00 | 2.43E+00  | 1.28  | 0.0177 | 1.83E+01  | 1.83E+01 |
| ENSMUSG00000073758 | Sh3d21         | 2.90E+00 | 2.90E+00  | 1.53  | 0.0251 | 1.83E+01  | 1.83E+01 |
| ENSMUSG00000028020 | Glrb           | 2.89E-01 | -3.47E+00 | -1.79 | 0.0360 | -1.83E+01 | 1.83E+01 |
| ENSMUSG00000049176 | Frmpr4         | 2.28E+00 | 2.28E+00  | 1.19  | 0.0156 | 1.82E+01  | 1.82E+01 |
| ENSMUSG00000103038 | Gm37124        | 3.52E-01 | -2.84E+00 | -1.51 | 0.0243 | -1.82E+01 | 1.82E+01 |
| ENSMUSG00000097301 | AW121686       | 3.22E+00 | 3.22E+00  | 1.69  | 0.0313 | 1.82E+01  | 1.82E+01 |
| ENSMUSG00000027309 | 4930402H24Rik  | 3.18E-01 | -3.15E+00 | -1.65 | 0.0298 | -1.82E+01 | 1.82E+01 |
| ENSMUSG00000021750 | Fam107a        | 4.01E+00 | 4.01E+00  | 2.00  | 0.0485 | 1.82E+01  | 1.82E+01 |
| ENSMUSG00000073771 | Btbd19         | 2.00E+00 | 2.00E+00  | 1.00  | 0.0121 | 1.82E+01  | 1.82E+01 |
| ENSMUSG00000045672 | Col27a1        | 3.42E-01 | -2.92E+00 | -1.55 | 0.0259 | -1.82E+01 | 1.82E+01 |
| ENSMUSG00000044367 | Slc16a13       | 2.33E+00 | 2.33E+00  | 1.22  | 0.0165 | 1.82E+01  | 1.82E+01 |
| ENSMUSG00000078528 | Gm17068        | 4.27E-01 | -2.34E+00 | -1.23 | 0.0166 | -1.82E+01 | 1.82E+01 |
| ENSMUSG00000058073 | Gm11189        | 2.72E-01 | -3.68E+00 | -1.88 | 0.0411 | -1.81E+01 | 1.81E+01 |
| ENSMUSG00000053297 | Al854703       | 3.01E+00 | 3.01E+00  | 1.59  | 0.0277 | 1.81E+01  | 1.81E+01 |
| ENSMUSG00000104123 | Gm37483        | 2.49E-01 | -4.02E+00 | -2.01 | 0.0495 | -1.81E+01 | 1.81E+01 |
| ENSMUSG00000083334 | Gm13579        | 3.63E-01 | -2.76E+00 | -1.46 | 0.0233 | -1.81E+01 | 1.81E+01 |
| ENSMUSG00000007039 | Ddah2          | 3.76E-01 | -2.66E+00 | -1.41 | 0.0218 | -1.80E+01 | 1.80E+01 |
| ENSMUSG00000074207 | Adh1           | 4.03E-01 | -2.48E+00 | -1.31 | 0.0191 | -1.79E+01 | 1.79E+01 |
| ENSMUSG00000060530 | A930017M01Rik  | 2.68E-01 | -3.74E+00 | -1.90 | 0.0435 | -1.79E+01 | 1.79E+01 |
| ENSMUSG00000030554 | Synm           | 3.53E-01 | -2.83E+00 | -1.50 | 0.0251 | -1.79E+01 | 1.79E+01 |
| ENSMUSG00000040969 | Arhgef38       | 3.97E-01 | -2.52E+00 | -1.33 | 0.0198 | -1.79E+01 | 1.79E+01 |
| ENSMUSG00000081988 | Gm15746        | 3.28E-01 | -3.05E+00 | -1.61 | 0.0292 | -1.79E+01 | 1.79E+01 |
| ENSMUSG00000080793 | Cbx3-ps3       | 2.69E-01 | -3.71E+00 | -1.89 | 0.0432 | -1.79E+01 | 1.79E+01 |
| ENSMUSG00000042284 | Itga1          | 3.66E-01 | -2.73E+00 | -1.45 | 0.0235 | -1.78E+01 | 1.78E+01 |
| ENSMUSG00000026459 | Myog           | 3.82E+00 | 3.82E+00  | 1.93  | 0.0459 | 1.78E+01  | 1.78E+01 |
| ENSMUSG00000092300 | Cdk3-ps        | 3.86E+00 | 3.86E+00  | 1.95  | 0.0470 | 1.78E+01  | 1.78E+01 |
| ENSMUSG00000019124 | Scrn1          | 4.92E-01 | -2.03E+00 | -1.02 | 0.0131 | -1.78E+01 | 1.78E+01 |

|                    |               |          |           |       |        |           |          |
|--------------------|---------------|----------|-----------|-------|--------|-----------|----------|
| ENSMUSG00000024925 | Rnaseh2c      | 3.83E-01 | -2.61E+00 | -1.38 | 0.0216 | -1.78E+01 | 1.78E+01 |
| ENSMUSG00000029321 | Slc10a6       | 2.50E+00 | 2.50E+00  | 1.32  | 0.0198 | 1.78E+01  | 1.78E+01 |
| ENSMUSG00000047757 | Fancb         | 3.57E-01 | -2.80E+00 | -1.49 | 0.0250 | -1.77E+01 | 1.77E+01 |
| ENSMUSG00000050069 | Grem2         | 3.87E-01 | -2.59E+00 | -1.37 | 0.0213 | -1.77E+01 | 1.77E+01 |
| ENSMUSG00000040740 | Slc25a34      | 3.81E+00 | 3.81E+00  | 1.93  | 0.0463 | 1.77E+01  | 1.77E+01 |
| ENSMUSG00000092097 | Gm5819        | 2.67E-01 | -3.74E+00 | -1.90 | 0.0447 | -1.77E+01 | 1.77E+01 |
| ENSMUSG00000042708 | Shcbp1l       | 3.58E+00 | 3.58E+00  | 1.84  | 0.0409 | 1.77E+01  | 1.77E+01 |
| ENSMUSG00000083609 | Gm16007       | 2.60E-01 | -3.85E+00 | -1.94 | 0.0472 | -1.77E+01 | 1.77E+01 |
| ENSMUSG00000101693 | Gm19461       | 4.59E-01 | -2.18E+00 | -1.12 | 0.0153 | -1.76E+01 | 1.76E+01 |
| ENSMUSG00000020160 | Meis1         | 4.44E-01 | -2.25E+00 | -1.17 | 0.0163 | -1.76E+01 | 1.76E+01 |
| ENSMUSG00000025153 | Fasn          | 4.40E-01 | -2.27E+00 | -1.18 | 0.0166 | -1.76E+01 | 1.76E+01 |
| ENSMUSG00000086500 | Gm15875       | 3.21E-01 | -3.12E+00 | -1.64 | 0.0314 | -1.76E+01 | 1.76E+01 |
| ENSMUSG00000038009 | Dnajc22       | 2.77E-01 | -3.61E+00 | -1.85 | 0.0421 | -1.76E+01 | 1.76E+01 |
| ENSMUSG00000078868 | Gm14412       | 3.60E-01 | -2.78E+00 | -1.47 | 0.0250 | -1.76E+01 | 1.76E+01 |
| ENSMUSG00000047501 | Cldn4         | 2.60E+00 | 2.60E+00  | 1.38  | 0.0220 | 1.76E+01  | 1.76E+01 |
| ENSMUSG00000087507 | Gm16141       | 3.97E-01 | -2.52E+00 | -1.33 | 0.0206 | -1.75E+01 | 1.75E+01 |
| ENSMUSG00000027424 | Mgme1         | 4.62E-01 | -2.17E+00 | -1.12 | 0.0153 | -1.75E+01 | 1.75E+01 |
| ENSMUSG00000034533 | Scn10a        | 3.18E-01 | -3.14E+00 | -1.65 | 0.0323 | -1.75E+01 | 1.75E+01 |
| ENSMUSG00000026888 | Grb14         | 4.76E-01 | -2.10E+00 | -1.07 | 0.0145 | -1.75E+01 | 1.75E+01 |
| ENSMUSG00000018672 | Copz2         | 4.84E-01 | -2.07E+00 | -1.05 | 0.0140 | -1.75E+01 | 1.75E+01 |
| ENSMUSG00000000628 | Hk2           | 2.14E+00 | 2.14E+00  | 1.10  | 0.0150 | 1.75E+01  | 1.75E+01 |
| ENSMUSG00000097744 | D030040B21Rik | 3.67E+00 | 3.67E+00  | 1.88  | 0.0442 | 1.74E+01  | 1.74E+01 |
| ENSMUSG00000022056 | Adam7         | 3.56E-01 | -2.81E+00 | -1.49 | 0.0260 | -1.74E+01 | 1.74E+01 |
| ENSMUSG00000045075 | Gm9796        | 3.60E+00 | 3.60E+00  | 1.85  | 0.0427 | 1.74E+01  | 1.74E+01 |
| ENSMUSG00000030443 | Zfp583        | 2.74E-01 | -3.66E+00 | -1.87 | 0.0441 | -1.74E+01 | 1.74E+01 |
| ENSMUSG00000041134 | Cypr1         | 4.63E-01 | -2.16E+00 | -1.11 | 0.0154 | -1.74E+01 | 1.74E+01 |
| ENSMUSG00000072640 | Lyrn9         | 4.97E-01 | -2.01E+00 | -1.01 | 0.0134 | -1.74E+01 | 1.74E+01 |
| ENSMUSG00000086877 | A230072C01Rik | 4.72E-01 | -2.12E+00 | -1.08 | 0.0149 | -1.74E+01 | 1.74E+01 |
| ENSMUSG00000106515 | RP23-473G18.1 | 3.05E-01 | -3.28E+00 | -1.71 | 0.0355 | -1.74E+01 | 1.74E+01 |
| ENSMUSG00000104719 | RP23-431M7.4  | 2.41E+00 | 2.41E+00  | 1.27  | 0.0193 | 1.74E+01  | 1.74E+01 |
| ENSMUSG00000104684 | RP24-270K7.3  | 3.60E-01 | -2.78E+00 | -1.47 | 0.0256 | -1.74E+01 | 1.74E+01 |
| ENSMUSG00000018411 | Mapt          | 3.02E-01 | -3.32E+00 | -1.73 | 0.0365 | -1.73E+01 | 1.73E+01 |
| ENSMUSG00000020461 | Clhc1         | 3.58E+00 | 3.58E+00  | 1.84  | 0.0427 | 1.73E+01  | 1.73E+01 |
| ENSMUSG00000080115 | Mettl21b      | 2.37E+00 | 2.37E+00  | 1.25  | 0.0187 | 1.73E+01  | 1.73E+01 |
| ENSMUSG00000029477 | Morn3         | 3.61E-01 | -2.77E+00 | -1.47 | 0.0255 | -1.73E+01 | 1.73E+01 |
| ENSMUSG00000018893 | Mb            | 3.63E-01 | -2.76E+00 | -1.46 | 0.0253 | -1.73E+01 | 1.73E+01 |
| ENSMUSG00000085028 | Slc2a4rg-ps   | 4.45E-01 | -2.25E+00 | -1.17 | 0.0168 | -1.73E+01 | 1.73E+01 |
| ENSMUSG00000022802 | Lmln          | 2.32E+00 | 2.32E+00  | 1.21  | 0.0180 | 1.73E+01  | 1.73E+01 |
| ENSMUSG00000105971 | RP23-372C7.8  | 4.37E-01 | -2.29E+00 | -1.20 | 0.0176 | -1.73E+01 | 1.73E+01 |
| ENSMUSG00000104848 | SNORA43       | 3.17E-01 | -3.16E+00 | -1.66 | 0.0335 | -1.73E+01 | 1.73E+01 |
| ENSMUSG00000106414 | RP23-309G12.1 | 3.32E-01 | -3.01E+00 | -1.59 | 0.0304 | -1.73E+01 | 1.73E+01 |
| ENSMUSG00000074607 | Tox2          | 2.24E+00 | 2.24E+00  | 1.16  | 0.0168 | 1.72E+01  | 1.72E+01 |
| ENSMUSG00000103952 | Gm37268       | 4.18E-01 | -2.39E+00 | -1.26 | 0.0193 | -1.72E+01 | 1.72E+01 |
| ENSMUSG00000105344 | RP23-286C5.1  | 2.60E-01 | -3.84E+00 | -1.94 | 0.0497 | -1.72E+01 | 1.72E+01 |
| ENSMUSG00000071226 | Cecr2         | 2.10E+00 | 2.10E+00  | 1.07  | 0.0149 | 1.72E+01  | 1.72E+01 |
| ENSMUSG00000050248 | Evc2          | 4.97E-01 | -2.01E+00 | -1.01 | 0.0137 | -1.72E+01 | 1.72E+01 |
| ENSMUSG00000030098 | Grip2         | 4.90E-01 | -2.04E+00 | -1.03 | 0.0140 | -1.72E+01 | 1.72E+01 |
| ENSMUSG00000089672 | Gp49a         | 3.30E+00 | 3.30E+00  | 1.72  | 0.0368 | 1.72E+01  | 1.72E+01 |
| ENSMUSG00000084085 | Gm16140       | 3.49E-01 | -2.87E+00 | -1.52 | 0.0278 | -1.72E+01 | 1.72E+01 |
| ENSMUSG00000057729 | Prtn3         | 3.27E+00 | 3.27E+00  | 1.71  | 0.0364 | 1.72E+01  | 1.72E+01 |
| ENSMUSG00000002265 | Peg3          | 2.33E+00 | 2.33E+00  | 1.22  | 0.0185 | 1.72E+01  | 1.72E+01 |
| ENSMUSG00000082857 | Gm12293       | 2.96E-01 | -3.38E+00 | -1.76 | 0.0388 | -1.72E+01 | 1.72E+01 |
| ENSMUSG00000095753 | Igkv4-53      | 3.44E+00 | 3.44E+00  | 1.78  | 0.0402 | 1.71E+01  | 1.71E+01 |
| ENSMUSG00000081016 | Olfir1397-ps1 | 3.30E-01 | -3.03E+00 | -1.60 | 0.0314 | -1.71E+01 | 1.71E+01 |
| ENSMUSG00000086620 | Rspo4os       | 2.68E+00 | 2.68E+00  | 1.42  | 0.0246 | 1.71E+01  | 1.71E+01 |
| ENSMUSG00000070802 | Pnmal2        | 3.45E-01 | -2.90E+00 | -1.54 | 0.0287 | -1.71E+01 | 1.71E+01 |
| ENSMUSG00000050014 | Apol10b       | 2.85E-01 | -3.51E+00 | -1.81 | 0.0423 | -1.71E+01 | 1.71E+01 |
| ENSMUSG00000029575 | Mmab          | 4.84E-01 | -2.07E+00 | -1.05 | 0.0147 | -1.70E+01 | 1.70E+01 |
| ENSMUSG00000047996 | Prrg1         | 4.67E-01 | -2.14E+00 | -1.10 | 0.0159 | -1.70E+01 | 1.70E+01 |
| ENSMUSG00000071691 | Gm960         | 2.72E+00 | 2.72E+00  | 1.44  | 0.0256 | 1.70E+01  | 1.70E+01 |
| ENSMUSG00000096546 | Smlr1         | 2.35E+00 | 2.35E+00  | 1.23  | 0.0190 | 1.70E+01  | 1.70E+01 |
| ENSMUSG00000019539 | Rcn3          | 4.32E-01 | -2.32E+00 | -1.21 | 0.0185 | -1.70E+01 | 1.70E+01 |
| ENSMUSG00000075591 | Gm10874       | 3.44E+00 | 3.44E+00  | 1.78  | 0.0408 | 1.70E+01  | 1.70E+01 |
| ENSMUSG00000088853 | Gm24730       | 3.53E-01 | -2.83E+00 | -1.50 | 0.0277 | -1.70E+01 | 1.70E+01 |
| ENSMUSG00000040693 | Slco4c1       | 4.50E-01 | -2.22E+00 | -1.15 | 0.0171 | -1.70E+01 | 1.70E+01 |
| ENSMUSG00000060445 | Sycp2         | 2.13E+00 | 2.13E+00  | 1.09  | 0.0157 | 1.70E+01  | 1.70E+01 |
| ENSMUSG00000079071 | Gm14085       | 3.96E-01 | -2.53E+00 | -1.34 | 0.0221 | -1.70E+01 | 1.70E+01 |

|                    |               |          |           |       |        |           |          |
|--------------------|---------------|----------|-----------|-------|--------|-----------|----------|
| ENSMUSG00000104402 | Gm38012       | 4.97E-01 | -2.01E+00 | -1.01 | 0.0140 | -1.70E+01 | 1.70E+01 |
| ENSMUSG00000041577 | Prelp         | 3.66E-01 | -2.73E+00 | -1.45 | 0.0259 | -1.70E+01 | 1.70E+01 |
| ENSMUSG00000006386 | Tek           | 3.77E-01 | -2.65E+00 | -1.41 | 0.0246 | -1.69E+01 | 1.69E+01 |
| ENSMUSG00000038980 | Rbbp8nl       | 3.20E-01 | -3.12E+00 | -1.64 | 0.0342 | -1.69E+01 | 1.69E+01 |
| ENSMUSG00000028443 | Nudt2         | 4.15E-01 | -2.41E+00 | -1.27 | 0.0203 | -1.69E+01 | 1.69E+01 |
| ENSMUSG00000075036 | Gm10805       | 3.16E+00 | 3.16E+00  | 1.66  | 0.0351 | 1.69E+01  | 1.69E+01 |
| ENSMUSG00000071176 | Arhgef10      | 3.61E-01 | -2.77E+00 | -1.47 | 0.0269 | -1.69E+01 | 1.69E+01 |
| ENSMUSG00000060188 | Cxcl17        | 2.44E+00 | 2.44E+00  | 1.29  | 0.0209 | 1.69E+01  | 1.69E+01 |
| ENSMUSG00000064061 | Dzip3         | 4.42E-01 | -2.26E+00 | -1.18 | 0.0180 | -1.69E+01 | 1.69E+01 |
| ENSMUSG00000089924 | Gm15689       | 2.85E-01 | -3.51E+00 | -1.81 | 0.0433 | -1.69E+01 | 1.69E+01 |
| ENSMUSG00000055612 | Cdca7         | 4.59E-01 | -2.18E+00 | -1.12 | 0.0168 | -1.68E+01 | 1.68E+01 |
| ENSMUSG00000101406 | Gm29200       | 3.38E-01 | -2.96E+00 | -1.57 | 0.0310 | -1.68E+01 | 1.68E+01 |
| ENSMUSG00000106073 | RP24-370B22.3 | 4.47E-01 | -2.24E+00 | -1.16 | 0.0177 | -1.68E+01 | 1.68E+01 |
| ENSMUSG00000084948 | 1700061H18Rik | 4.51E-01 | -2.22E+00 | -1.15 | 0.0174 | -1.68E+01 | 1.68E+01 |
| ENSMUSG00000086704 | Gm14582       | 4.41E-01 | -2.27E+00 | -1.18 | 0.0182 | -1.68E+01 | 1.68E+01 |
| ENSMUSG00000029122 | Evc           | 3.61E-01 | -2.77E+00 | -1.47 | 0.0272 | -1.68E+01 | 1.68E+01 |
| ENSMUSG00000096986 | 4930509E16Rik | 2.16E+00 | 2.16E+00  | 1.11  | 0.0166 | 1.67E+01  | 1.67E+01 |
| ENSMUSG00000090576 | Gm17055       | 3.13E+00 | 3.13E+00  | 1.65  | 0.0350 | 1.67E+01  | 1.67E+01 |
| ENSMUSG00000063018 | 2010204K13Rik | 4.02E-01 | -2.49E+00 | -1.31 | 0.0221 | -1.67E+01 | 1.67E+01 |
| ENSMUSG00000086410 | Gm16158       | 2.51E+00 | 2.51E+00  | 1.33  | 0.0226 | 1.67E+01  | 1.67E+01 |
| ENSMUSG00000030748 | Il4ra         | 2.10E+00 | 2.10E+00  | 1.07  | 0.0158 | 1.67E+01  | 1.67E+01 |
| ENSMUSG00000024773 | Atg2a         | 3.38E+00 | 3.38E+00  | 1.76  | 0.0411 | 1.67E+01  | 1.67E+01 |
| ENSMUSG00000085539 | Gm15561       | 3.14E-01 | -3.19E+00 | -1.67 | 0.0367 | -1.66E+01 | 1.66E+01 |
| ENSMUSG00000025020 | Slit1         | 3.28E+00 | 3.28E+00  | 1.71  | 0.0389 | 1.66E+01  | 1.66E+01 |
| ENSMUSG00000045100 | Slc25a26      | 4.75E-01 | -2.10E+00 | -1.07 | 0.0161 | -1.66E+01 | 1.66E+01 |
| ENSMUSG00000106633 | RP23-265M4.3  | 4.63E-01 | -2.16E+00 | -1.11 | 0.0170 | -1.66E+01 | 1.66E+01 |
| ENSMUSG00000104851 | RP24-496C22.5 | 3.52E-01 | -2.84E+00 | -1.51 | 0.0295 | -1.66E+01 | 1.66E+01 |
| ENSMUSG00000067998 | Bpifb9a       | 3.17E-01 | -3.15E+00 | -1.66 | 0.0363 | -1.65E+01 | 1.65E+01 |
| ENSMUSG00000104376 | Gm37516       | 3.33E-01 | -3.01E+00 | -1.59 | 0.0330 | -1.65E+01 | 1.65E+01 |
| ENSMUSG00000027820 | Mme           | 4.61E-01 | -2.17E+00 | -1.12 | 0.0172 | -1.65E+01 | 1.65E+01 |
| ENSMUSG00000025511 | Tspan4        | 2.64E+00 | 2.64E+00  | 1.40  | 0.0255 | 1.65E+01  | 1.65E+01 |
| ENSMUSG00000053603 | 4930442H23Rik | 2.52E+00 | 2.52E+00  | 1.33  | 0.0233 | 1.65E+01  | 1.65E+01 |
| ENSMUSG00000104118 | Gm37298       | 4.02E-01 | -2.49E+00 | -1.32 | 0.0228 | -1.65E+01 | 1.65E+01 |
| ENSMUSG00000060206 | Zfp462        | 4.63E-01 | -2.16E+00 | -1.11 | 0.0171 | -1.65E+01 | 1.65E+01 |
| ENSMUSG00000030125 | Lrrc23        | 3.63E-01 | -2.75E+00 | -1.46 | 0.0280 | -1.64E+01 | 1.64E+01 |
| ENSMUSG00000000489 | Pdgfb         | 3.17E-01 | -3.15E+00 | -1.66 | 0.0368 | -1.64E+01 | 1.64E+01 |
| ENSMUSG00000107363 | RP23-319P12.4 | 4.39E-01 | -2.28E+00 | -1.19 | 0.0192 | -1.64E+01 | 1.64E+01 |
| ENSMUSG00000094282 | Ccdc42b       | 2.95E-01 | -3.38E+00 | -1.76 | 0.0426 | -1.64E+01 | 1.64E+01 |
| ENSMUSG00000052549 | Arl13a        | 2.67E+00 | 2.67E+00  | 1.42  | 0.0265 | 1.64E+01  | 1.64E+01 |
| ENSMUSG00000024063 | Lbh           | 4.25E-01 | -2.35E+00 | -1.23 | 0.0206 | -1.64E+01 | 1.64E+01 |
| ENSMUSG00000090779 | Gm17110       | 3.26E-01 | -3.06E+00 | -1.62 | 0.0350 | -1.64E+01 | 1.64E+01 |
| ENSMUSG00000036813 | Entpd8        | 2.58E+00 | 2.58E+00  | 1.37  | 0.0250 | 1.64E+01  | 1.64E+01 |
| ENSMUSG00000066607 | 6030419C18Rik | 4.21E-01 | -2.37E+00 | -1.25 | 0.0211 | -1.64E+01 | 1.64E+01 |
| ENSMUSG00000102300 | Gm34106       | 2.74E+00 | 2.74E+00  | 1.45  | 0.0280 | 1.63E+01  | 1.63E+01 |
| ENSMUSG00000103828 | 2610001A08Rik | 4.08E-01 | -2.45E+00 | -1.29 | 0.0225 | -1.63E+01 | 1.63E+01 |
| ENSMUSG00000002617 | Zfp40         | 3.88E-01 | -2.58E+00 | -1.37 | 0.0249 | -1.63E+01 | 1.63E+01 |
| ENSMUSG00000040883 | Tmem205       | 4.35E-01 | -2.30E+00 | -1.20 | 0.0198 | -1.63E+01 | 1.63E+01 |
| ENSMUSG00000105694 | RP23-387F14.1 | 4.34E-01 | -2.31E+00 | -1.20 | 0.0200 | -1.63E+01 | 1.63E+01 |
| ENSMUSG00000085496 | 4930517E11Rik | 2.94E-01 | -3.40E+00 | -1.76 | 0.0434 | -1.63E+01 | 1.63E+01 |
| ENSMUSG00000072473 | 1700024G13Rik | 3.16E-01 | -3.16E+00 | -1.66 | 0.0379 | -1.63E+01 | 1.63E+01 |
| ENSMUSG00000025262 | Fam120c       | 4.60E-01 | -2.17E+00 | -1.12 | 0.0179 | -1.62E+01 | 1.62E+01 |
| ENSMUSG00000005674 | Tommm40l      | 3.64E-01 | -2.74E+00 | -1.46 | 0.0286 | -1.62E+01 | 1.62E+01 |
| ENSMUSG00000067203 | H2-K2         | 4.26E-01 | -2.35E+00 | -1.23 | 0.0211 | -1.62E+01 | 1.62E+01 |
| ENSMUSG00000000530 | Acvrl1        | 3.62E-01 | -2.76E+00 | -1.47 | 0.0292 | -1.62E+01 | 1.62E+01 |
| ENSMUSG00000097504 | 4930516B21Rik | 4.03E-01 | -2.48E+00 | -1.31 | 0.0238 | -1.61E+01 | 1.61E+01 |
| ENSMUSG00000091906 | 1700099I09Rik | 3.90E-01 | -2.56E+00 | -1.36 | 0.0255 | -1.61E+01 | 1.61E+01 |
| ENSMUSG00000097509 | B230322F03Rik | 2.20E+00 | 2.20E+00  | 1.13  | 0.0188 | 1.60E+01  | 1.60E+01 |
| ENSMUSG00000047686 | Zcchc5        | 3.07E-01 | -3.26E+00 | -1.70 | 0.0414 | -1.60E+01 | 1.60E+01 |
| ENSMUSG00000094796 | BC147527      | 2.97E-01 | -3.37E+00 | -1.75 | 0.0444 | -1.60E+01 | 1.60E+01 |
| ENSMUSG00000101007 | Gm29541       | 3.49E+00 | 3.49E+00  | 1.80  | 0.0480 | 1.59E+01  | 1.59E+01 |
| ENSMUSG00000047592 | Nxpe5         | 2.53E+00 | 2.53E+00  | 1.34  | 0.0252 | 1.59E+01  | 1.59E+01 |
| ENSMUSG00000089639 | Gm2862        | 3.44E-01 | -2.90E+00 | -1.54 | 0.0332 | -1.59E+01 | 1.59E+01 |
| ENSMUSG00000040181 | Fmo1          | 3.00E-01 | -3.34E+00 | -1.74 | 0.0439 | -1.59E+01 | 1.59E+01 |
| ENSMUSG00000050675 | Gp1ba         | 2.55E+00 | 2.55E+00  | 1.35  | 0.0257 | 1.59E+01  | 1.59E+01 |
| ENSMUSG00000031897 | Psmb10        | 4.67E-01 | -2.14E+00 | -1.10 | 0.0181 | -1.59E+01 | 1.59E+01 |
| ENSMUSG00000105954 | RP24-299A7.2  | 2.14E+00 | 2.14E+00  | 1.10  | 0.0181 | 1.59E+01  | 1.59E+01 |
| ENSMUSG00000037801 | lqch          | 3.30E-01 | -3.03E+00 | -1.60 | 0.0365 | -1.59E+01 | 1.59E+01 |

|                    |               |          |           |       |        |           |          |
|--------------------|---------------|----------|-----------|-------|--------|-----------|----------|
| ENSMUSG00000044633 | B530045E10Rik | 3.38E-01 | -2.96E+00 | -1.56 | 0.0347 | -1.59E+01 | 1.59E+01 |
| ENSMUSG00000050650 | Mrgpra1       | 2.22E+00 | 2.22E+00  | 1.15  | 0.0197 | 1.59E+01  | 1.59E+01 |
| ENSMUSG00000001156 | Mxd1          | 2.21E+00 | 2.21E+00  | 1.14  | 0.0194 | 1.59E+01  | 1.59E+01 |
| ENSMUSG00000029821 | Dfna5         | 2.40E+00 | 2.40E+00  | 1.26  | 0.0229 | 1.58E+01  | 1.58E+01 |
| ENSMUSG00000044390 | Tigd3         | 3.42E+00 | 3.42E+00  | 1.77  | 0.0467 | 1.58E+01  | 1.58E+01 |
| ENSMUSG00000039069 | Mtg2          | 4.06E-01 | -2.46E+00 | -1.30 | 0.0243 | -1.58E+01 | 1.58E+01 |
| ENSMUSG00000056073 | Grik2         | 2.93E-01 | -3.41E+00 | -1.77 | 0.0465 | -1.58E+01 | 1.58E+01 |
| ENSMUSG00000090019 | Gimap1        | 4.96E-01 | -2.02E+00 | -1.01 | 0.0163 | -1.58E+01 | 1.58E+01 |
| ENSMUSG00000058454 | Dhcr7         | 3.96E-01 | -2.52E+00 | -1.34 | 0.0255 | -1.58E+01 | 1.58E+01 |
| ENSMUSG00000107215 | RP23-253G12.9 | 3.83E-01 | -2.61E+00 | -1.38 | 0.0273 | -1.58E+01 | 1.58E+01 |
| ENSMUSG00000106603 | RP24-496C22.6 | 3.66E-01 | -2.73E+00 | -1.45 | 0.0301 | -1.58E+01 | 1.58E+01 |
| ENSMUSG00000099934 | Gm17983       | 3.25E+00 | 3.25E+00  | 1.70  | 0.0427 | 1.57E+01  | 1.57E+01 |
| ENSMUSG00000013236 | Ptprs         | 4.82E-01 | -2.07E+00 | -1.05 | 0.0173 | -1.57E+01 | 1.57E+01 |
| ENSMUSG00000005686 | Ampd3         | 2.96E+00 | 2.96E+00  | 1.57  | 0.0355 | 1.57E+01  | 1.57E+01 |
| ENSMUSG00000024736 | Tmem132a      | 3.72E-01 | -2.69E+00 | -1.43 | 0.0292 | -1.57E+01 | 1.57E+01 |
| ENSMUSG00000020774 | Aspa          | 4.98E-01 | -2.01E+00 | -1.01 | 0.0163 | -1.57E+01 | 1.57E+01 |
| ENSMUSG00000086598 | Btbd18        | 3.38E+00 | 3.38E+00  | 1.76  | 0.0463 | 1.57E+01  | 1.57E+01 |
| ENSMUSG00000051648 | Kctd19        | 3.36E+00 | 3.36E+00  | 1.75  | 0.0460 | 1.57E+01  | 1.57E+01 |
| ENSMUSG00000102316 | Gm37629       | 3.46E+00 | 3.46E+00  | 1.79  | 0.0487 | 1.57E+01  | 1.57E+01 |
| ENSMUSG00000028642 | 4930538K18Rik | 3.23E+00 | 3.23E+00  | 1.69  | 0.0426 | 1.57E+01  | 1.57E+01 |
| ENSMUSG00000059751 | Rps3a3        | 3.73E-01 | -2.68E+00 | -1.42 | 0.0293 | -1.57E+01 | 1.57E+01 |
| ENSMUSG00000024299 | Adamts10      | 4.75E-01 | -2.10E+00 | -1.07 | 0.0181 | -1.57E+01 | 1.57E+01 |
| ENSMUSG00000048988 | Elfn1         | 4.52E-01 | -2.21E+00 | -1.15 | 0.0200 | -1.56E+01 | 1.56E+01 |
| ENSMUSG00000006711 | D130043K22Rik | 3.80E-01 | -2.63E+00 | -1.40 | 0.0283 | -1.56E+01 | 1.56E+01 |
| ENSMUSG00000091818 | Rpl19-ps4     | 3.25E+00 | 3.25E+00  | 1.70  | 0.0433 | 1.56E+01  | 1.56E+01 |
| ENSMUSG00000085170 | Lrrc75aos1    | 3.15E-01 | -3.18E+00 | -1.67 | 0.0413 | -1.56E+01 | 1.56E+01 |
| ENSMUSG00000042918 | Mamstr        | 2.20E+00 | 2.20E+00  | 1.14  | 0.0199 | 1.56E+01  | 1.56E+01 |
| ENSMUSG00000025731 | 0610011F06Rik | 4.87E-01 | -2.05E+00 | -1.04 | 0.0173 | -1.56E+01 | 1.56E+01 |
| ENSMUSG00000093490 | Gm19932       | 2.95E-01 | -3.39E+00 | -1.76 | 0.0472 | -1.56E+01 | 1.56E+01 |
| ENSMUSG00000027015 | Cybrd1        | 4.30E-01 | -2.32E+00 | -1.22 | 0.0222 | -1.56E+01 | 1.56E+01 |
| ENSMUSG00000085173 | Gm2869        | 2.47E+00 | 2.47E+00  | 1.31  | 0.0252 | 1.56E+01  | 1.56E+01 |
| ENSMUSG00000039065 | Fam173b       | 4.33E-01 | -2.31E+00 | -1.21 | 0.0220 | -1.56E+01 | 1.56E+01 |
| ENSMUSG00000085247 | 4930545L23Rik | 3.61E-01 | -2.77E+00 | -1.47 | 0.0317 | -1.56E+01 | 1.56E+01 |
| ENSMUSG00000077903 | Mir294        | 2.33E+00 | 2.33E+00  | 1.22  | 0.0225 | 1.55E+01  | 1.55E+01 |
| ENSMUSG00000053965 | Pde5a         | 3.76E-01 | -2.66E+00 | -1.41 | 0.0294 | -1.55E+01 | 1.55E+01 |
| ENSMUSG00000074417 | Gm14548       | 2.90E+00 | 2.90E+00  | 1.54  | 0.0349 | 1.55E+01  | 1.55E+01 |
| ENSMUSG00000077493 | Snord91a      | 3.17E-01 | -3.16E+00 | -1.66 | 0.0414 | -1.55E+01 | 1.55E+01 |
| ENSMUSG00000003872 | Lin7b         | 2.17E+00 | 2.17E+00  | 1.12  | 0.0196 | 1.55E+01  | 1.55E+01 |
| ENSMUSG00000087361 | 0610043K17Rik | 3.37E+00 | 3.37E+00  | 1.75  | 0.0474 | 1.55E+01  | 1.55E+01 |
| ENSMUSG00000022288 | 4930447A16Rik | 3.07E-01 | -3.26E+00 | -1.70 | 0.0442 | -1.55E+01 | 1.55E+01 |
| ENSMUSG00000084250 | Gm13550       | 3.27E-01 | -3.06E+00 | -1.61 | 0.0391 | -1.55E+01 | 1.55E+01 |
| ENSMUSG00000042826 | Fgf11         | 4.67E-01 | -2.14E+00 | -1.10 | 0.0192 | -1.55E+01 | 1.55E+01 |
| ENSMUSG00000022639 | 5330426P16Rik | 3.96E-01 | -2.53E+00 | -1.34 | 0.0267 | -1.55E+01 | 1.55E+01 |
| ENSMUSG00000010362 | Rdm1          | 4.04E-01 | -2.48E+00 | -1.31 | 0.0257 | -1.54E+01 | 1.54E+01 |
| ENSMUSG00000075302 | Erich2        | 3.89E-01 | -2.57E+00 | -1.36 | 0.0278 | -1.54E+01 | 1.54E+01 |
| ENSMUSG00000031443 | F7            | 3.30E-01 | -3.03E+00 | -1.60 | 0.0387 | -1.54E+01 | 1.54E+01 |
| ENSMUSG00000084960 | B430010I23Rik | 4.15E-01 | -2.41E+00 | -1.27 | 0.0245 | -1.54E+01 | 1.54E+01 |
| ENSMUSG00000032596 | Uba7          | 3.64E-01 | -2.75E+00 | -1.46 | 0.0320 | -1.54E+01 | 1.54E+01 |
| ENSMUSG00000103768 | Gm37856       | 2.06E+00 | 2.06E+00  | 1.04  | 0.0179 | 1.54E+01  | 1.54E+01 |
| ENSMUSG00000106590 | RP23-181P9.3  | 2.31E+00 | 2.31E+00  | 1.21  | 0.0227 | 1.53E+01  | 1.53E+01 |
| ENSMUSG00000104798 | RP23-59B8.1   | 2.24E+00 | 2.24E+00  | 1.16  | 0.0213 | 1.53E+01  | 1.53E+01 |
| ENSMUSG00000020781 | Tsen54        | 2.29E+00 | 2.29E+00  | 1.19  | 0.0223 | 1.53E+01  | 1.53E+01 |
| ENSMUSG00000035200 | ChrnB4        | 2.43E+00 | 2.43E+00  | 1.28  | 0.0252 | 1.53E+01  | 1.53E+01 |
| ENSMUSG00000038751 | Ptk6          | 2.53E+00 | 2.53E+00  | 1.34  | 0.0275 | 1.53E+01  | 1.53E+01 |
| ENSMUSG00000073599 | Ecscr         | 3.59E-01 | -2.78E+00 | -1.48 | 0.0332 | -1.53E+01 | 1.53E+01 |
| ENSMUSG00000094655 | Gm25360       | 3.32E+00 | 3.32E+00  | 1.73  | 0.0474 | 1.53E+01  | 1.53E+01 |
| ENSMUSG00000051671 | Coa6          | 4.74E-01 | -2.11E+00 | -1.08 | 0.0192 | -1.52E+01 | 1.52E+01 |
| ENSMUSG00000083372 | Gm11235       | 4.77E-01 | -2.09E+00 | -1.07 | 0.0189 | -1.52E+01 | 1.52E+01 |
| ENSMUSG00000093910 | Zfp853        | 3.99E-01 | -2.51E+00 | -1.33 | 0.0272 | -1.52E+01 | 1.52E+01 |
| ENSMUSG00000042433 | Pih1h3b       | 3.22E-01 | -3.10E+00 | -1.63 | 0.0417 | -1.52E+01 | 1.52E+01 |
| ENSMUSG00000036214 | Znrd1as       | 4.26E-01 | -2.35E+00 | -1.23 | 0.0239 | -1.52E+01 | 1.52E+01 |
| ENSMUSG00000004473 | Clec11a       | 4.62E-01 | -2.17E+00 | -1.11 | 0.0203 | -1.52E+01 | 1.52E+01 |
| ENSMUSG00000035126 | Wdr78         | 3.48E-01 | -2.87E+00 | -1.52 | 0.0359 | -1.52E+01 | 1.52E+01 |
| ENSMUSG00000041845 | Rhod          | 4.54E-01 | -2.20E+00 | -1.14 | 0.0211 | -1.52E+01 | 1.52E+01 |
| ENSMUSG00000033187 | BC016579      | 3.28E+00 | 3.28E+00  | 1.72  | 0.0470 | 1.52E+01  | 1.52E+01 |
| ENSMUSG00000045629 | Sh3tc2        | 4.48E-01 | -2.23E+00 | -1.16 | 0.0217 | -1.51E+01 | 1.51E+01 |
| ENSMUSG00000017453 | Pipox         | 2.13E+00 | 2.13E+00  | 1.09  | 0.0199 | 1.51E+01  | 1.51E+01 |

|                    |               |          |           |       |        |           |          |
|--------------------|---------------|----------|-----------|-------|--------|-----------|----------|
| ENSMUSG00000050370 | Ch25h         | 3.12E+00 | 3.12E+00  | 1.64  | 0.0425 | 1.51E+01  | 1.51E+01 |
| ENSMUSG00000034110 | Kctd7         | 4.87E-01 | -2.05E+00 | -1.04 | 0.0186 | -1.51E+01 | 1.51E+01 |
| ENSMUSG00000078861 | Zfp931        | 4.30E-01 | -2.32E+00 | -1.22 | 0.0238 | -1.51E+01 | 1.51E+01 |
| ENSMUSG00000024905 | Mtl5          | 2.95E+00 | 2.95E+00  | 1.56  | 0.0384 | 1.50E+01  | 1.50E+01 |
| ENSMUSG00000042515 | Mum1l1        | 3.50E-01 | -2.86E+00 | -1.51 | 0.0361 | -1.50E+01 | 1.50E+01 |
| ENSMUSG00000006642 | Tcf23         | 2.31E+00 | 2.31E+00  | 1.21  | 0.0236 | 1.50E+01  | 1.50E+01 |
| ENSMUSG00000007908 | Hmgcll1       | 3.92E-01 | -2.55E+00 | -1.35 | 0.0290 | -1.50E+01 | 1.50E+01 |
| ENSMUSG00000093656 | Gm20628       | 2.66E+00 | 2.66E+00  | 1.41  | 0.0315 | 1.50E+01  | 1.50E+01 |
| ENSMUSG00000085069 | Gm13111       | 3.10E-01 | -3.23E+00 | -1.69 | 0.0465 | -1.50E+01 | 1.50E+01 |
| ENSMUSG00000095794 | Igkv6-17      | 2.33E+00 | 2.33E+00  | 1.22  | 0.0243 | 1.49E+01  | 1.49E+01 |
| ENSMUSG00000033610 | Pank1         | 4.05E-01 | -2.47E+00 | -1.30 | 0.0273 | -1.49E+01 | 1.49E+01 |
| ENSMUSG00000071037 | Camkmt        | 3.61E-01 | -2.77E+00 | -1.47 | 0.0344 | -1.49E+01 | 1.49E+01 |
| ENSMUSG00000094595 | Fsbp          | 2.44E+00 | 2.44E+00  | 1.29  | 0.0267 | 1.49E+01  | 1.49E+01 |
| ENSMUSG00000065642 | Snora69       | 3.32E-01 | -3.01E+00 | -1.59 | 0.0408 | -1.49E+01 | 1.49E+01 |
| ENSMUSG00000104709 | RP24-231P10.4 | 3.08E-01 | -3.25E+00 | -1.70 | 0.0476 | -1.49E+01 | 1.49E+01 |
| ENSMUSG00000027524 | Edn3          | 3.80E-01 | -2.63E+00 | -1.40 | 0.0314 | -1.49E+01 | 1.49E+01 |
| ENSMUSG00000027490 | E2f1          | 4.24E-01 | -2.36E+00 | -1.24 | 0.0252 | -1.49E+01 | 1.49E+01 |
| ENSMUSG00000084839 | Gm14097       | 4.39E-01 | -2.28E+00 | -1.19 | 0.0235 | -1.48E+01 | 1.48E+01 |
| ENSMUSG00000099553 | Gm29538       | 3.36E-01 | -2.98E+00 | -1.57 | 0.0402 | -1.48E+01 | 1.48E+01 |
| ENSMUSG00000043153 | lspd          | 3.90E-01 | -2.57E+00 | -1.36 | 0.0299 | -1.48E+01 | 1.48E+01 |
| ENSMUSG00000102200 | Gm36957       | 2.10E+00 | 2.10E+00  | 1.07  | 0.0201 | 1.48E+01  | 1.48E+01 |
| ENSMUSG00000042439 | Zfp532        | 4.82E-01 | -2.08E+00 | -1.05 | 0.0196 | -1.48E+01 | 1.48E+01 |
| ENSMUSG00000083725 | Gm11865       | 3.10E-01 | -3.23E+00 | -1.69 | 0.0475 | -1.48E+01 | 1.48E+01 |
| ENSMUSG00000051490 | Foxd4         | 3.07E+00 | 3.07E+00  | 1.62  | 0.0431 | 1.48E+01  | 1.48E+01 |
| ENSMUSG00000035868 | 3110052M02Rik | 4.68E-01 | -2.14E+00 | -1.10 | 0.0211 | -1.47E+01 | 1.47E+01 |
| ENSMUSG00000087017 | 4930417H01Rik | 3.16E+00 | 3.16E+00  | 1.66  | 0.0462 | 1.47E+01  | 1.47E+01 |
| ENSMUSG00000093695 | Gm20717       | 4.16E-01 | -2.40E+00 | -1.27 | 0.0268 | -1.47E+01 | 1.47E+01 |
| ENSMUSG00000099847 | Gm29458       | 2.78E+00 | 2.78E+00  | 1.48  | 0.0361 | 1.47E+01  | 1.47E+01 |
| ENSMUSG00000045968 | Teddm2        | 2.27E+00 | 2.27E+00  | 1.18  | 0.0240 | 1.46E+01  | 1.46E+01 |
| ENSMUSG00000024921 | Smarca2       | 4.13E-01 | -2.42E+00 | -1.28 | 0.0275 | -1.46E+01 | 1.46E+01 |
| ENSMUSG00000062794 | Zfp599        | 2.71E+00 | 2.71E+00  | 1.44  | 0.0346 | 1.46E+01  | 1.46E+01 |
| ENSMUSG00000053963 | 6330403A02Rik | 2.05E+00 | 2.05E+00  | 1.04  | 0.0198 | 1.46E+01  | 1.46E+01 |
| ENSMUSG00000032300 | 1700017B05Rik | 3.10E+00 | 3.10E+00  | 1.63  | 0.0453 | 1.46E+01  | 1.46E+01 |
| ENSMUSG00000090255 | 4921534H16Rik | 3.32E-01 | -3.01E+00 | -1.59 | 0.0427 | -1.46E+01 | 1.46E+01 |
| ENSMUSG00000023345 | Poc1a         | 2.76E+00 | 2.76E+00  | 1.46  | 0.0358 | 1.46E+01  | 1.46E+01 |
| ENSMUSG00000053886 | Sh2d4a        | 4.15E-01 | -2.41E+00 | -1.27 | 0.0275 | -1.45E+01 | 1.45E+01 |
| ENSMUSG00000037169 | Mycn          | 3.83E-01 | -2.61E+00 | -1.38 | 0.0323 | -1.45E+01 | 1.45E+01 |
| ENSMUSG00000103940 | Gm38227       | 3.14E+00 | 3.14E+00  | 1.65  | 0.0469 | 1.45E+01  | 1.45E+01 |
| ENSMUSG00000032271 | Nnmt          | 2.28E+00 | 2.28E+00  | 1.19  | 0.0249 | 1.45E+01  | 1.45E+01 |
| ENSMUSG00000091183 | Gm5141        | 4.17E-01 | -2.40E+00 | -1.26 | 0.0275 | -1.45E+01 | 1.45E+01 |
| ENSMUSG00000061601 | Pclo          | 3.56E-01 | -2.81E+00 | -1.49 | 0.0380 | -1.44E+01 | 1.44E+01 |
| ENSMUSG00000105700 | RP24-158C2.3  | 3.96E-01 | -2.52E+00 | -1.34 | 0.0307 | -1.44E+01 | 1.44E+01 |
| ENSMUSG00000058159 | T2            | 3.28E-01 | -3.05E+00 | -1.61 | 0.0449 | -1.44E+01 | 1.44E+01 |
| ENSMUSG00000020264 | Slc36a2       | 3.77E-01 | -2.65E+00 | -1.41 | 0.0339 | -1.44E+01 | 1.44E+01 |
| ENSMUSG00000015627 | Gata5         | 4.25E-01 | -2.35E+00 | -1.24 | 0.0268 | -1.44E+01 | 1.44E+01 |
| ENSMUSG00000021684 | Pde8b         | 4.21E-01 | -2.38E+00 | -1.25 | 0.0273 | -1.44E+01 | 1.44E+01 |
| ENSMUSG00000019880 | Rspo3         | 3.83E-01 | -2.61E+00 | -1.38 | 0.0330 | -1.44E+01 | 1.44E+01 |
| ENSMUSG00000026494 | Kif26b        | 4.70E-01 | -2.13E+00 | -1.09 | 0.0220 | -1.44E+01 | 1.44E+01 |
| ENSMUSG00000025810 | Nrp1          | 4.01E-01 | -2.49E+00 | -1.32 | 0.0302 | -1.43E+01 | 1.43E+01 |
| ENSMUSG00000024593 | Megf10        | 3.33E-01 | -3.01E+00 | -1.59 | 0.0440 | -1.43E+01 | 1.43E+01 |
| ENSMUSG00000093651 | Gm5873        | 4.61E-01 | -2.17E+00 | -1.12 | 0.0230 | -1.43E+01 | 1.43E+01 |
| ENSMUSG00000061371 | Zfp873        | 4.08E-01 | -2.45E+00 | -1.29 | 0.0293 | -1.43E+01 | 1.43E+01 |
| ENSMUSG00000040086 | Tnni3k        | 4.42E-01 | -2.26E+00 | -1.18 | 0.0250 | -1.43E+01 | 1.43E+01 |
| ENSMUSG00000090659 | Zfp493        | 3.20E-01 | -3.12E+00 | -1.64 | 0.0479 | -1.43E+01 | 1.43E+01 |
| ENSMUSG00000031725 | Ces1f         | 3.81E-01 | -2.62E+00 | -1.39 | 0.0339 | -1.43E+01 | 1.43E+01 |
| ENSMUSG00000038077 | Kcna6         | 4.26E-01 | -2.34E+00 | -1.23 | 0.0272 | -1.42E+01 | 1.42E+01 |
| ENSMUSG00000106010 | RP24-296L6.2  | 3.05E+00 | 3.05E+00  | 1.61  | 0.0461 | 1.42E+01  | 1.42E+01 |
| ENSMUSG00000037624 | Kcnk2         | 3.72E-01 | -2.69E+00 | -1.43 | 0.0358 | -1.42E+01 | 1.42E+01 |
| ENSMUSG00000007659 | Bcl2l1        | 2.20E+00 | 2.20E+00  | 1.14  | 0.0240 | 1.42E+01  | 1.42E+01 |
| ENSMUSG00000106371 | RP24-535M14.1 | 4.60E-01 | -2.17E+00 | -1.12 | 0.0235 | -1.42E+01 | 1.42E+01 |
| ENSMUSG00000030237 | Slco1a4       | 2.91E+00 | 2.91E+00  | 1.54  | 0.0421 | 1.42E+01  | 1.42E+01 |
| ENSMUSG00000069763 | Tmem100       | 4.54E-01 | -2.20E+00 | -1.14 | 0.0240 | -1.42E+01 | 1.42E+01 |
| ENSMUSG00000105366 | RP23-192D21.1 | 3.59E-01 | -2.79E+00 | -1.48 | 0.0386 | -1.42E+01 | 1.42E+01 |
| ENSMUSG00000033182 | Kbtbd12       | 4.22E-01 | -2.37E+00 | -1.25 | 0.0280 | -1.42E+01 | 1.42E+01 |
| ENSMUSG00000045555 | Mettl24       | 4.24E-01 | -2.36E+00 | -1.24 | 0.0277 | -1.42E+01 | 1.42E+01 |
| ENSMUSG00000025931 | Paqr8         | 3.81E-01 | -2.63E+00 | -1.39 | 0.0346 | -1.41E+01 | 1.41E+01 |
| ENSMUSG00000077438 | Gm22595       | 3.30E-01 | -3.03E+00 | -1.60 | 0.0462 | -1.41E+01 | 1.41E+01 |

|                      |               |          |           |       |        |           |          |
|----------------------|---------------|----------|-----------|-------|--------|-----------|----------|
| ENSMUSG00000097954   | Gm4217        | 2.54E+00 | 2.54E+00  | 1.34  | 0.0324 | 1.41E+01  | 1.41E+01 |
| ENSMUSG00000001168   | Oas1h         | 4.32E-01 | -2.32E+00 | -1.21 | 0.0270 | -1.41E+01 | 1.41E+01 |
| ENSMUSG000000076499  | Trbv31        | 3.23E-01 | -3.10E+00 | -1.63 | 0.0486 | -1.41E+01 | 1.41E+01 |
| ENSMUSG000000039116  | Adgrg6        | 3.82E-01 | -2.62E+00 | -1.39 | 0.0347 | -1.41E+01 | 1.41E+01 |
| ENSMUSG000000031458  | Coprs         | 4.65E-01 | -2.15E+00 | -1.10 | 0.0235 | -1.40E+01 | 1.40E+01 |
| ENSMUSG00000104206   | Gm32250       | 2.83E+00 | 2.83E+00  | 1.50  | 0.0407 | 1.40E+01  | 1.40E+01 |
| ENSMUSG000000097232  | Gm26854       | 3.30E-01 | -3.03E+00 | -1.60 | 0.0468 | -1.40E+01 | 1.40E+01 |
| ENSMUSG000000034872  | Gipc3         | 3.36E-01 | -2.98E+00 | -1.57 | 0.0451 | -1.40E+01 | 1.40E+01 |
| ENSMUSG000000018340  | Anxa6         | 4.48E-01 | -2.23E+00 | -1.16 | 0.0253 | -1.40E+01 | 1.40E+01 |
| ENSMUSG000000047485  | Klhl34        | 4.29E-01 | -2.33E+00 | -1.22 | 0.0278 | -1.40E+01 | 1.40E+01 |
| ENSMUSG000000087104  | Tmem132cos    | 3.74E-01 | -2.67E+00 | -1.42 | 0.0365 | -1.40E+01 | 1.40E+01 |
| ENSMUSG000000074466  | Gm15417       | 2.90E+00 | 2.90E+00  | 1.54  | 0.0430 | 1.40E+01  | 1.40E+01 |
| ENSMUSG000000097558  | Gm26902       | 2.46E+00 | 2.46E+00  | 1.30  | 0.0309 | 1.40E+01  | 1.40E+01 |
| ENSMUSG00000105041   | RP23-10F17.3  | 3.87E-01 | -2.58E+00 | -1.37 | 0.0342 | -1.40E+01 | 1.40E+01 |
| ENSMUSG000000031075  | Ano1          | 4.97E-01 | -2.01E+00 | -1.01 | 0.0208 | -1.39E+01 | 1.39E+01 |
| ENSMUSG000000078867  | Gm14418       | 4.97E-01 | -2.01E+00 | -1.01 | 0.0209 | -1.39E+01 | 1.39E+01 |
| ENSMUSG00000000359   | Rem1          | 4.15E-01 | -2.41E+00 | -1.27 | 0.0300 | -1.39E+01 | 1.39E+01 |
| ENSMUSG000000053964  | Lgals4        | 2.39E+00 | 2.39E+00  | 1.26  | 0.0297 | 1.39E+01  | 1.39E+01 |
| ENSMUSG000000021886  | Gpr65         | 2.47E+00 | 2.47E+00  | 1.30  | 0.0316 | 1.39E+01  | 1.39E+01 |
| ENSMUSG000000058192  | Zfp846        | 4.48E-01 | -2.23E+00 | -1.16 | 0.0259 | -1.39E+01 | 1.39E+01 |
| ENSMUSG000000070282  | 3000002C10Rik | 3.28E-01 | -3.05E+00 | -1.61 | 0.0483 | -1.39E+01 | 1.39E+01 |
| ENSMUSG000000030401  | Rtn2          | 4.07E-01 | -2.46E+00 | -1.30 | 0.0316 | -1.38E+01 | 1.38E+01 |
| ENSMUSG00000100747   | 1700084E18Rik | 2.56E+00 | 2.56E+00  | 1.35  | 0.0343 | 1.38E+01  | 1.38E+01 |
| ENSMUSG00000106446   | RP23-50E10.1  | 3.38E-01 | -2.96E+00 | -1.56 | 0.0460 | -1.38E+01 | 1.38E+01 |
| ENSMUSG000000045776  | Lrtm1         | 3.54E-01 | -2.82E+00 | -1.50 | 0.0420 | -1.38E+01 | 1.38E+01 |
| ENSMUSG000000097742  | Gm26535       | 2.27E+00 | 2.27E+00  | 1.18  | 0.0273 | 1.38E+01  | 1.38E+01 |
| ENSMUSG000000097484  | Gm26807       | 2.85E+00 | 2.85E+00  | 1.51  | 0.0430 | 1.37E+01  | 1.37E+01 |
| ENSMUSG000000086181  | C230034O21Rik | 3.48E-01 | -2.87E+00 | -1.52 | 0.0438 | -1.37E+01 | 1.37E+01 |
| ENSMUSG000000073403  | Gm10499       | 3.52E-01 | -2.84E+00 | -1.51 | 0.0430 | -1.37E+01 | 1.37E+01 |
| ENSMUSG000000074158  | 9830147E19Rik | 4.58E-01 | -2.19E+00 | -1.13 | 0.0254 | -1.37E+01 | 1.37E+01 |
| ENSMUSG000000094786  | Gm14403       | 3.93E-01 | -2.54E+00 | -1.35 | 0.0344 | -1.37E+01 | 1.37E+01 |
| ENSMUSG000000005672  | Kit           | 3.44E-01 | -2.91E+00 | -1.54 | 0.0450 | -1.37E+01 | 1.37E+01 |
| ENSMUSG000000089889  | 0610040B10Rik | 2.16E+00 | 2.16E+00  | 1.11  | 0.0250 | 1.37E+01  | 1.37E+01 |
| ENSMUSG000000098076  | Gm6981        | 4.23E-01 | -2.37E+00 | -1.24 | 0.0299 | -1.37E+01 | 1.37E+01 |
| ENSMUSG000000029097  | Trmt44        | 2.28E+00 | 2.28E+00  | 1.19  | 0.0279 | 1.37E+01  | 1.37E+01 |
| ENSMUSG000000002504  | Slc9a3r2      | 3.58E-01 | -2.80E+00 | -1.48 | 0.0419 | -1.37E+01 | 1.37E+01 |
| ENSMUSG00000100313   | Gm28323       | 3.89E-01 | -2.57E+00 | -1.36 | 0.0354 | -1.37E+01 | 1.37E+01 |
| ENSMUSG000000086687  | 4930547E08Rik | 3.02E+00 | 3.02E+00  | 1.59  | 0.0488 | 1.36E+01  | 1.36E+01 |
| ENSMUSG000000020137  | Thap2         | 4.10E-01 | -2.44E+00 | -1.29 | 0.0320 | -1.36E+01 | 1.36E+01 |
| ENSMUSG00000106197   | RP23-200E11.2 | 4.22E-01 | -2.37E+00 | -1.24 | 0.0302 | -1.36E+01 | 1.36E+01 |
| ENSMUSG000000025083  | Afap1l2       | 3.99E-01 | -2.50E+00 | -1.32 | 0.0340 | -1.36E+01 | 1.36E+01 |
| ENSMUSG000000074874  | Ctla2b        | 2.67E+00 | 2.67E+00  | 1.41  | 0.0386 | 1.36E+01  | 1.36E+01 |
| ENSMUSG000000026610  | Esrrg         | 3.82E-01 | -2.62E+00 | -1.39 | 0.0374 | -1.36E+01 | 1.36E+01 |
| ENSMUSG00000106944   | RP23-16J8.6   | 3.43E-01 | -2.91E+00 | -1.54 | 0.0464 | -1.35E+01 | 1.35E+01 |
| ENSMUSG000000093740  | Gm18417       | 2.99E+00 | 2.99E+00  | 1.58  | 0.0487 | 1.35E+01  | 1.35E+01 |
| ENSMUSG000000045414  | 1190002N15Rik | 4.39E-01 | -2.28E+00 | -1.19 | 0.0284 | -1.35E+01 | 1.35E+01 |
| ENSMUSG000000034127  | Tspan8        | 4.40E-01 | -2.27E+00 | -1.18 | 0.0283 | -1.35E+01 | 1.35E+01 |
| ENSMUSG00000105771   | RP24-253A20.1 | 3.95E-01 | -2.53E+00 | -1.34 | 0.0353 | -1.35E+01 | 1.35E+01 |
| ENSMUSG000000055370  | Gm9968        | 4.25E-01 | -2.36E+00 | -1.24 | 0.0305 | -1.35E+01 | 1.35E+01 |
| ENSMUSG000000038305  | Spats2l       | 3.74E-01 | -2.67E+00 | -1.42 | 0.0395 | -1.34E+01 | 1.34E+01 |
| ENSMUSG000000021294  | Kif26a        | 4.20E-01 | -2.38E+00 | -1.25 | 0.0315 | -1.34E+01 | 1.34E+01 |
| ENSMUSG000000093772  | 4931403E22Rik | 3.61E-01 | -2.77E+00 | -1.47 | 0.0426 | -1.34E+01 | 1.34E+01 |
| ENSMUSG000000028573  | Fggy          | 3.79E-01 | -2.64E+00 | -1.40 | 0.0386 | -1.34E+01 | 1.34E+01 |
| ENSMUSG000000073242  | Dnmt3aos      | 4.22E-01 | -2.37E+00 | -1.24 | 0.0312 | -1.34E+01 | 1.34E+01 |
| ENSMUSG000000022376  | Adcy8         | 3.85E-01 | -2.60E+00 | -1.38 | 0.0374 | -1.34E+01 | 1.34E+01 |
| ENSMUSG0000000103885 | Gm37006       | 4.64E-01 | -2.16E+00 | -1.11 | 0.0258 | -1.34E+01 | 1.34E+01 |
| ENSMUSG00000105357   | RP23-7K18.3   | 3.44E-01 | -2.91E+00 | -1.54 | 0.0472 | -1.34E+01 | 1.34E+01 |
| ENSMUSG000000030048  | Gkn3          | 3.64E-01 | -2.75E+00 | -1.46 | 0.0423 | -1.34E+01 | 1.34E+01 |
| ENSMUSG000000061540  | Orm2          | 2.72E+00 | 2.72E+00  | 1.44  | 0.0413 | 1.34E+01  | 1.34E+01 |
| ENSMUSG000000046318  | Ccbe1         | 2.34E+00 | 2.34E+00  | 1.22  | 0.0306 | 1.34E+01  | 1.34E+01 |
| ENSMUSG00000105877   | RP23-358D12.3 | 3.74E-01 | -2.67E+00 | -1.42 | 0.0402 | -1.33E+01 | 1.33E+01 |
| ENSMUSG000000017344  | Vtn           | 4.87E-01 | -2.06E+00 | -1.04 | 0.0238 | -1.33E+01 | 1.33E+01 |
| ENSMUSG000000029335  | Bmp3          | 4.93E-01 | -2.03E+00 | -1.02 | 0.0232 | -1.33E+01 | 1.33E+01 |
| ENSMUSG000000047787  | Flrt1         | 4.44E-01 | -2.25E+00 | -1.17 | 0.0286 | -1.33E+01 | 1.33E+01 |
| ENSMUSG000000040690  | Col16a1       | 3.96E-01 | -2.52E+00 | -1.34 | 0.0360 | -1.33E+01 | 1.33E+01 |
| ENSMUSG00000106839   | RP23-438D3.4  | 3.94E-01 | -2.54E+00 | -1.34 | 0.0365 | -1.33E+01 | 1.33E+01 |
| ENSMUSG000000022656  | Pvrl3         | 4.63E-01 | -2.16E+00 | -1.11 | 0.0265 | -1.33E+01 | 1.33E+01 |

|                    |               |          |           |       |        |           |          |
|--------------------|---------------|----------|-----------|-------|--------|-----------|----------|
| ENSMUSG00000097795 | Gm7678        | 4.13E-01 | -2.42E+00 | -1.28 | 0.0333 | -1.33E+01 | 1.33E+01 |
| ENSMUSG00000081375 | Gm14686       | 2.72E+00 | 2.72E+00  | 1.44  | 0.0420 | 1.33E+01  | 1.33E+01 |
| ENSMUSG00000053080 | 2700081O15Rik | 4.57E-01 | -2.19E+00 | -1.13 | 0.0273 | -1.32E+01 | 1.32E+01 |
| ENSMUSG00000040855 | Reps2         | 3.78E-01 | -2.65E+00 | -1.40 | 0.0402 | -1.32E+01 | 1.32E+01 |
| ENSMUSG00000085280 | Gm16151       | 4.04E-01 | -2.47E+00 | -1.31 | 0.0351 | -1.32E+01 | 1.32E+01 |
| ENSMUSG00000096215 | Smim22        | 3.41E-01 | -2.94E+00 | -1.55 | 0.0496 | -1.32E+01 | 1.32E+01 |
| ENSMUSG00000086479 | Gm16014       | 2.38E+00 | 2.38E+00  | 1.25  | 0.0325 | 1.32E+01  | 1.32E+01 |
| ENSMUSG00000056185 | Snx32         | 4.48E-01 | -2.23E+00 | -1.16 | 0.0287 | -1.32E+01 | 1.32E+01 |
| ENSMUSG00000062905 | Vmn1r32       | 2.44E+00 | 2.44E+00  | 1.29  | 0.0346 | 1.31E+01  | 1.31E+01 |
| ENSMUSG00000020135 | Apc2          | 4.45E-01 | -2.25E+00 | -1.17 | 0.0293 | -1.31E+01 | 1.31E+01 |
| ENSMUSG00000097885 | 5031434O11Rik | 2.05E+00 | 2.05E+00  | 1.04  | 0.0244 | 1.31E+01  | 1.31E+01 |
| ENSMUSG00000089662 | Gm14057       | 4.30E-01 | -2.33E+00 | -1.22 | 0.0315 | -1.31E+01 | 1.31E+01 |
| ENSMUSG00000098482 | Mir6363       | 3.66E-01 | -2.73E+00 | -1.45 | 0.0436 | -1.31E+01 | 1.31E+01 |
| ENSMUSG00000087395 | Gm12705       | 4.18E-01 | -2.39E+00 | -1.26 | 0.0335 | -1.31E+01 | 1.31E+01 |
| ENSMUSG00000030263 | Lrmp          | 2.16E+00 | 2.16E+00  | 1.11  | 0.0273 | 1.31E+01  | 1.31E+01 |
| ENSMUSG00000032134 | Muc16         | 3.80E-01 | -2.63E+00 | -1.40 | 0.0406 | -1.31E+01 | 1.31E+01 |
| ENSMUSG00000035295 | Wdr38         | 3.90E-01 | -2.56E+00 | -1.36 | 0.0386 | -1.31E+01 | 1.31E+01 |
| ENSMUSG00000082394 | Gm4596        | 2.43E+00 | 2.43E+00  | 1.28  | 0.0348 | 1.30E+01  | 1.30E+01 |
| ENSMUSG00000049526 | Tmem202       | 2.27E+00 | 2.27E+00  | 1.18  | 0.0302 | 1.30E+01  | 1.30E+01 |
| ENSMUSG00000040987 | Mill2         | 4.48E-01 | -2.23E+00 | -1.16 | 0.0294 | -1.30E+01 | 1.30E+01 |
| ENSMUSG00000036551 | Akap14        | 4.12E-01 | -2.42E+00 | -1.28 | 0.0347 | -1.30E+01 | 1.30E+01 |
| ENSMUSG00000104713 | Gbp6          | 4.19E-01 | -2.39E+00 | -1.26 | 0.0337 | -1.30E+01 | 1.30E+01 |
| ENSMUSG00000083287 | Gm13502       | 3.47E-01 | -2.88E+00 | -1.53 | 0.0490 | -1.30E+01 | 1.30E+01 |
| ENSMUSG00000038390 | Gpr162        | 4.92E-01 | -2.03E+00 | -1.02 | 0.0244 | -1.30E+01 | 1.30E+01 |
| ENSMUSG00000073609 | D2hgdh        | 4.86E-01 | -2.06E+00 | -1.04 | 0.0251 | -1.30E+01 | 1.30E+01 |
| ENSMUSG00000021013 | Ttc8          | 4.28E-01 | -2.34E+00 | -1.22 | 0.0325 | -1.30E+01 | 1.30E+01 |
| ENSMUSG00000038406 | Scaf1         | 2.72E+00 | 2.72E+00  | 1.44  | 0.0440 | 1.30E+01  | 1.30E+01 |
| ENSMUSG00000037313 | Tacc3         | 2.13E+00 | 2.13E+00  | 1.09  | 0.0270 | 1.30E+01  | 1.30E+01 |
| ENSMUSG00000064925 | Snora62       | 2.23E+00 | 2.23E+00  | 1.15  | 0.0296 | 1.30E+01  | 1.30E+01 |
| ENSMUSG00000029718 | Pcolce        | 4.32E-01 | -2.32E+00 | -1.21 | 0.0321 | -1.29E+01 | 1.29E+01 |
| ENSMUSG00000081585 | Gm12926       | 4.66E-01 | -2.14E+00 | -1.10 | 0.0276 | -1.29E+01 | 1.29E+01 |
| ENSMUSG00000098889 | Gm27206       | 4.81E-01 | -2.08E+00 | -1.06 | 0.0261 | -1.29E+01 | 1.29E+01 |
| ENSMUSG00000099875 | Gm15453       | 2.70E+00 | 2.70E+00  | 1.43  | 0.0439 | 1.29E+01  | 1.29E+01 |
| ENSMUSG00000042066 | Tmcc2         | 4.62E-01 | -2.17E+00 | -1.12 | 0.0285 | -1.28E+01 | 1.28E+01 |
| ENSMUSG00000015224 | Cyp2j9        | 4.47E-01 | -2.24E+00 | -1.16 | 0.0305 | -1.28E+01 | 1.28E+01 |
| ENSMUSG00000019945 | 1700040L02Rik | 4.90E-01 | -2.04E+00 | -1.03 | 0.0255 | -1.28E+01 | 1.28E+01 |
| ENSMUSG00000024960 | Plcb3         | 4.66E-01 | -2.15E+00 | -1.10 | 0.0283 | -1.28E+01 | 1.28E+01 |
| ENSMUSG00000032076 | Cadm1         | 4.51E-01 | -2.22E+00 | -1.15 | 0.0302 | -1.28E+01 | 1.28E+01 |
| ENSMUSG00000105784 | RP23-113O9.4  | 2.26E+00 | 2.26E+00  | 1.17  | 0.0314 | 1.27E+01  | 1.27E+01 |
| ENSMUSG00000048022 | Tmem229a      | 3.73E-01 | -2.68E+00 | -1.42 | 0.0444 | -1.27E+01 | 1.27E+01 |
| ENSMUSG00000102959 | Gm37015       | 2.42E+00 | 2.42E+00  | 1.27  | 0.0362 | 1.27E+01  | 1.27E+01 |
| ENSMUSG00000102326 | Gm37788       | 4.11E-01 | -2.43E+00 | -1.28 | 0.0365 | -1.27E+01 | 1.27E+01 |
| ENSMUSG00000097254 | C430042M11Rik | 2.03E+00 | 2.03E+00  | 1.02  | 0.0254 | 1.27E+01  | 1.27E+01 |
| ENSMUSG00000097461 | Gm26735       | 4.59E-01 | -2.18E+00 | -1.12 | 0.0294 | -1.27E+01 | 1.27E+01 |
| ENSMUSG00000024391 | Apom          | 2.79E+00 | 2.79E+00  | 1.48  | 0.0482 | 1.27E+01  | 1.27E+01 |
| ENSMUSG00000101951 | Gm28721       | 2.83E+00 | 2.83E+00  | 1.50  | 0.0497 | 1.27E+01  | 1.27E+01 |
| ENSMUSG00000089376 | Gm22136       | 3.78E-01 | -2.65E+00 | -1.40 | 0.0435 | -1.27E+01 | 1.27E+01 |
| ENSMUSG00000044229 | Nxpe4         | 4.29E-01 | -2.33E+00 | -1.22 | 0.0338 | -1.27E+01 | 1.27E+01 |
| ENSMUSG00000068762 | Gstm6         | 4.35E-01 | -2.30E+00 | -1.20 | 0.0330 | -1.27E+01 | 1.27E+01 |
| ENSMUSG00000044921 | Rassf9        | 4.49E-01 | -2.23E+00 | -1.16 | 0.0310 | -1.27E+01 | 1.27E+01 |
| ENSMUSG00000103427 | Gm37534       | 3.87E-01 | -2.58E+00 | -1.37 | 0.0418 | -1.26E+01 | 1.26E+01 |
| ENSMUSG00000033065 | Pfkm          | 4.86E-01 | -2.06E+00 | -1.04 | 0.0268 | -1.26E+01 | 1.26E+01 |
| ENSMUSG00000039887 | Alg14         | 4.12E-01 | -2.43E+00 | -1.28 | 0.0373 | -1.26E+01 | 1.26E+01 |
| ENSMUSG00000097707 | Gm26742       | 4.72E-01 | -2.12E+00 | -1.08 | 0.0284 | -1.26E+01 | 1.26E+01 |
| ENSMUSG00000033863 | Klf9          | 2.32E+00 | 2.32E+00  | 1.21  | 0.0342 | 1.26E+01  | 1.26E+01 |
| ENSMUSG00000019853 | Hebp2         | 4.04E-01 | -2.48E+00 | -1.31 | 0.0389 | -1.26E+01 | 1.26E+01 |
| ENSMUSG00000043251 | Exoc3l        | 4.05E-01 | -2.47E+00 | -1.30 | 0.0387 | -1.26E+01 | 1.26E+01 |
| ENSMUSG00000001663 | Gstt1         | 4.22E-01 | -2.37E+00 | -1.24 | 0.0357 | -1.25E+01 | 1.25E+01 |
| ENSMUSG00000027574 | Nkain4        | 4.26E-01 | -2.35E+00 | -1.23 | 0.0352 | -1.25E+01 | 1.25E+01 |
| ENSMUSG00000086930 | Frs3os        | 4.53E-01 | -2.21E+00 | -1.14 | 0.0313 | -1.25E+01 | 1.25E+01 |
| ENSMUSG00000052776 | Oas1a         | 4.09E-01 | -2.44E+00 | -1.29 | 0.0386 | -1.24E+01 | 1.24E+01 |
| ENSMUSG00000045031 | Cetn4         | 4.29E-01 | -2.33E+00 | -1.22 | 0.0351 | -1.24E+01 | 1.24E+01 |
| ENSMUSG00000069743 | Zfp820        | 4.90E-01 | -2.04E+00 | -1.03 | 0.0270 | -1.24E+01 | 1.24E+01 |
| ENSMUSG00000031825 | Crispld2      | 2.10E+00 | 2.10E+00  | 1.07  | 0.0287 | 1.24E+01  | 1.24E+01 |
| ENSMUSG00000032988 | Slc16a8       | 2.40E+00 | 2.40E+00  | 1.26  | 0.0374 | 1.24E+01  | 1.24E+01 |
| ENSMUSG00000039699 | Batf2         | 3.80E-01 | -2.63E+00 | -1.40 | 0.0449 | -1.24E+01 | 1.24E+01 |
| ENSMUSG00000002763 | Pex6          | 4.42E-01 | -2.26E+00 | -1.18 | 0.0332 | -1.24E+01 | 1.24E+01 |

|                     |               |          |           |       |        |           |          |
|---------------------|---------------|----------|-----------|-------|--------|-----------|----------|
| ENSMUSG00000038742  | Angptl6       | 4.08E-01 | -2.45E+00 | -1.29 | 0.0393 | -1.24E+01 | 1.24E+01 |
| ENSMUSG00000047557  | Lxn           | 4.88E-01 | -2.05E+00 | -1.03 | 0.0275 | -1.24E+01 | 1.24E+01 |
| ENSMUSG00000071757  | Zhx2          | 3.87E-01 | -2.58E+00 | -1.37 | 0.0437 | -1.23E+01 | 1.23E+01 |
| ENSMUSG00000058056  | Palld         | 4.55E-01 | -2.20E+00 | -1.14 | 0.0319 | -1.23E+01 | 1.23E+01 |
| ENSMUSG00000052373  | Mpp3          | 2.08E+00 | 2.08E+00  | 1.06  | 0.0287 | 1.23E+01  | 1.23E+01 |
| ENSMUSG00000084202  | Gm5398        | 2.27E+00 | 2.27E+00  | 1.18  | 0.0345 | 1.22E+01  | 1.22E+01 |
| ENSMUSG00000028354  | Fmn2          | 4.15E-01 | -2.41E+00 | -1.27 | 0.0390 | -1.22E+01 | 1.22E+01 |
| ENSMUSG00000009772  | Nuak2         | 2.32E+00 | 2.32E+00  | 1.21  | 0.0362 | 1.22E+01  | 1.22E+01 |
| ENSMUSG00000045930  | Clec14a       | 4.51E-01 | -2.22E+00 | -1.15 | 0.0333 | -1.22E+01 | 1.22E+01 |
| ENSMUSG00000021048  | Mthfd1        | 4.26E-01 | -2.35E+00 | -1.23 | 0.0373 | -1.22E+01 | 1.22E+01 |
| ENSMUSG00000035932  | Olf750        | 4.38E-01 | -2.28E+00 | -1.19 | 0.0353 | -1.22E+01 | 1.22E+01 |
| ENSMUSG00000076677  | Ighv6-3       | 3.90E-01 | -2.56E+00 | -1.36 | 0.0446 | -1.21E+01 | 1.21E+01 |
| ENSMUSG00000103808  | Gm37060       | 4.25E-01 | -2.35E+00 | -1.23 | 0.0377 | -1.21E+01 | 1.21E+01 |
| ENSMUSG00000062861  | Zfp28         | 4.44E-01 | -2.25E+00 | -1.17 | 0.0346 | -1.21E+01 | 1.21E+01 |
| ENSMUSG00000035711  | Dok3          | 2.04E+00 | 2.04E+00  | 1.03  | 0.0284 | 1.21E+01  | 1.21E+01 |
| ENSMUSG00000051851  | Cxx1c         | 3.75E-01 | -2.67E+00 | -1.42 | 0.0486 | -1.21E+01 | 1.21E+01 |
| ENSMUSG00000106957  | RP24-168A7.7  | 4.52E-01 | -2.21E+00 | -1.15 | 0.0335 | -1.21E+01 | 1.21E+01 |
| ENSMUSG00000084306  | Gm11743       | 4.76E-01 | -2.10E+00 | -1.07 | 0.0302 | -1.21E+01 | 1.21E+01 |
| ENSMUSG00000083121  | Gm6341        | 4.15E-01 | -2.41E+00 | -1.27 | 0.0397 | -1.21E+01 | 1.21E+01 |
| ENSMUSG00000089785  | Slc25a5-ps    | 2.37E+00 | 2.37E+00  | 1.25  | 0.0387 | 1.21E+01  | 1.21E+01 |
| ENSMUSG00000102501  | Gm37372       | 3.89E-01 | -2.57E+00 | -1.36 | 0.0455 | -1.21E+01 | 1.21E+01 |
| ENSMUSG00000101555  | Gm28731       | 2.42E+00 | 2.42E+00  | 1.27  | 0.0402 | 1.21E+01  | 1.21E+01 |
| ENSMUSG00000039577  | Nphp4         | 4.49E-01 | -2.23E+00 | -1.16 | 0.0344 | -1.20E+01 | 1.20E+01 |
| ENSMUSG00000033460  | Armcx1        | 3.90E-01 | -2.56E+00 | -1.36 | 0.0454 | -1.20E+01 | 1.20E+01 |
| ENSMUSG00000103656  | Gm37205       | 4.26E-01 | -2.35E+00 | -1.23 | 0.0383 | -1.20E+01 | 1.20E+01 |
| ENSMUSG00000088856  | Gm24727       | 2.63E+00 | 2.63E+00  | 1.40  | 0.0482 | 1.20E+01  | 1.20E+01 |
| ENSMUSG00000030219  | Erp27         | 2.58E+00 | 2.58E+00  | 1.37  | 0.0463 | 1.20E+01  | 1.20E+01 |
| ENSMUSG0000008035   | Mid1ip1       | 4.74E-01 | -2.11E+00 | -1.08 | 0.0309 | -1.20E+01 | 1.20E+01 |
| ENSMUSG00000025817  | Nudt5         | 4.45E-01 | -2.24E+00 | -1.17 | 0.0351 | -1.20E+01 | 1.20E+01 |
| ENSMUSG00000040136  | Abcc8         | 4.37E-01 | -2.29E+00 | -1.19 | 0.0365 | -1.20E+01 | 1.20E+01 |
| ENSMUSG00000039246  | Lyp1al1       | 3.84E-01 | -2.60E+00 | -1.38 | 0.0474 | -1.20E+01 | 1.20E+01 |
| ENSMUSG00000026938  | Fcna          | 2.55E+00 | 2.55E+00  | 1.35  | 0.0456 | 1.20E+01  | 1.20E+01 |
| ENSMUSG00000104034  | 2900092N22Rik | 4.99E-01 | -2.00E+00 | -1.00 | 0.0281 | -1.19E+01 | 1.19E+01 |
| ENSMUSG00000033715  | Akr1c14       | 2.39E+00 | 2.39E+00  | 1.26  | 0.0401 | 1.19E+01  | 1.19E+01 |
| ENSMUSG00000047604  | Frat2         | 2.19E+00 | 2.19E+00  | 1.13  | 0.0337 | 1.19E+01  | 1.19E+01 |
| ENSMUSG00000054426  | A930005H10Rik | 2.07E+00 | 2.07E+00  | 1.05  | 0.0303 | 1.19E+01  | 1.19E+01 |
| ENSMUSG00000054021  | Sirt5         | 3.84E-01 | -2.60E+00 | -1.38 | 0.0478 | -1.19E+01 | 1.19E+01 |
| ENSMUSG00000011382  | Dhdh          | 4.28E-01 | -2.34E+00 | -1.22 | 0.0386 | -1.19E+01 | 1.19E+01 |
| ENSMUSG00000047735  | Samd9l        | 4.81E-01 | -2.08E+00 | -1.06 | 0.0306 | -1.19E+01 | 1.19E+01 |
| ENSMUSG00000032006  | Pdgfd         | 3.78E-01 | -2.65E+00 | -1.40 | 0.0497 | -1.19E+01 | 1.19E+01 |
| ENSMUSG00000065899  | Gm24523       | 2.35E+00 | 2.35E+00  | 1.23  | 0.0391 | 1.19E+01  | 1.19E+01 |
| ENSMUSG00000033111  | 3830406C13Rik | 4.85E-01 | -2.06E+00 | -1.04 | 0.0302 | -1.19E+01 | 1.19E+01 |
| ENSMUSG00000009246  | Trpm5         | 2.20E+00 | 2.20E+00  | 1.14  | 0.0346 | 1.18E+01  | 1.18E+01 |
| ENSMUSG00000074283  | Zfp109        | 4.33E-01 | -2.31E+00 | -1.21 | 0.0383 | -1.18E+01 | 1.18E+01 |
| ENSMUSG00000105733  | RP23-50E10.4  | 4.44E-01 | -2.25E+00 | -1.17 | 0.0366 | -1.18E+01 | 1.18E+01 |
| ENSMUSG00000081733  | Gm12852       | 4.18E-01 | -2.39E+00 | -1.26 | 0.0414 | -1.18E+01 | 1.18E+01 |
| ENSMUSG00000107325  | RP23-342A15.2 | 2.28E+00 | 2.28E+00  | 1.19  | 0.0375 | 1.18E+01  | 1.18E+01 |
| ENSMUSG00000023176  | Cpn2          | 2.34E+00 | 2.34E+00  | 1.23  | 0.0396 | 1.18E+01  | 1.18E+01 |
| ENSMUSG00000042770  | Hebp1         | 4.81E-01 | -2.08E+00 | -1.06 | 0.0313 | -1.18E+01 | 1.18E+01 |
| ENSMUSG00000017188  | Coa3          | 4.71E-01 | -2.12E+00 | -1.09 | 0.0326 | -1.18E+01 | 1.18E+01 |
| ENSMUSG00000030544  | Mesp1         | 4.30E-01 | -2.33E+00 | -1.22 | 0.0392 | -1.18E+01 | 1.18E+01 |
| ENSMUSG00000060470  | Adgrg3        | 2.02E+00 | 2.02E+00  | 1.01  | 0.0295 | 1.18E+01  | 1.18E+01 |
| ENSMUSG00000069874  | Irgm2         | 4.49E-01 | -2.23E+00 | -1.15 | 0.0359 | -1.17E+01 | 1.17E+01 |
| ENSMUSG00000102205  | 9430092D12Rik | 4.23E-01 | -2.37E+00 | -1.24 | 0.0406 | -1.17E+01 | 1.17E+01 |
| ENSMUSG00000025453  | Nnt           | 4.28E-01 | -2.34E+00 | -1.22 | 0.0396 | -1.17E+01 | 1.17E+01 |
| ENSMUSG000000014158 | Trpv4         | 2.17E+00 | 2.17E+00  | 1.12  | 0.0343 | 1.17E+01  | 1.17E+01 |
| ENSMUSG000000097890 | 4930547M16Rik | 4.09E-01 | -2.45E+00 | -1.29 | 0.0440 | -1.17E+01 | 1.17E+01 |
| ENSMUSG00000103403  | Gm37931       | 2.11E+00 | 2.11E+00  | 1.08  | 0.0329 | 1.17E+01  | 1.17E+01 |
| ENSMUSG00000078864  | Gm14322       | 4.14E-01 | -2.42E+00 | -1.27 | 0.0429 | -1.17E+01 | 1.17E+01 |
| ENSMUSG00000056553  | Ptprn2        | 2.16E+00 | 2.16E+00  | 1.11  | 0.0343 | 1.16E+01  | 1.16E+01 |
| ENSMUSG00000102344  | 9430053O09Rik | 4.90E-01 | -2.04E+00 | -1.03 | 0.0309 | -1.16E+01 | 1.16E+01 |
| ENSMUSG00000035112  | Wnk4          | 2.24E+00 | 2.24E+00  | 1.16  | 0.0372 | 1.16E+01  | 1.16E+01 |
| ENSMUSG00000020604  | Arsg          | 2.12E+00 | 2.12E+00  | 1.08  | 0.0333 | 1.16E+01  | 1.16E+01 |
| ENSMUSG00000032066  | Bco2          | 4.25E-01 | -2.35E+00 | -1.24 | 0.0412 | -1.16E+01 | 1.16E+01 |
| ENSMUSG00000106461  | RP23-112C14.1 | 4.59E-01 | -2.18E+00 | -1.12 | 0.0353 | -1.16E+01 | 1.16E+01 |
| ENSMUSG00000083679  | Gm12892       | 4.95E-01 | -2.02E+00 | -1.01 | 0.0307 | -1.15E+01 | 1.15E+01 |
| ENSMUSG00000072115  | Ang           | 4.67E-01 | -2.14E+00 | -1.10 | 0.0345 | -1.15E+01 | 1.15E+01 |

|                    |               |          |           |       |        |           |          |
|--------------------|---------------|----------|-----------|-------|--------|-----------|----------|
| ENSMUSG00000070000 | Fcho1         | 2.23E+00 | 2.23E+00  | 1.16  | 0.0376 | 1.15E+01  | 1.15E+01 |
| ENSMUSG00000057751 | Megf6         | 4.91E-01 | -2.04E+00 | -1.03 | 0.0313 | -1.15E+01 | 1.15E+01 |
| ENSMUSG00000038248 | Sobp          | 2.15E+00 | 2.15E+00  | 1.10  | 0.0351 | 1.15E+01  | 1.15E+01 |
| ENSMUSG00000063450 | Syne2         | 4.86E-01 | -2.06E+00 | -1.04 | 0.0322 | -1.15E+01 | 1.15E+01 |
| ENSMUSG00000048087 | Gm4737        | 2.47E+00 | 2.47E+00  | 1.31  | 0.0466 | 1.15E+01  | 1.15E+01 |
| ENSMUSG00000020486 | Sep4          | 4.46E-01 | -2.24E+00 | -1.16 | 0.0387 | -1.14E+01 | 1.14E+01 |
| ENSMUSG00000029524 | Sirt4         | 4.65E-01 | -2.15E+00 | -1.11 | 0.0357 | -1.14E+01 | 1.14E+01 |
| ENSMUSG00000083356 | Gm11708       | 2.03E+00 | 2.03E+00  | 1.02  | 0.0317 | 1.14E+01  | 1.14E+01 |
| ENSMUSG00000103553 | Gm38218       | 2.18E+00 | 2.18E+00  | 1.12  | 0.0368 | 1.14E+01  | 1.14E+01 |
| ENSMUSG00000048534 | Amica1        | 2.20E+00 | 2.20E+00  | 1.14  | 0.0377 | 1.14E+01  | 1.14E+01 |
| ENSMUSG00000074867 | Zfp808        | 4.20E-01 | -2.38E+00 | -1.25 | 0.0440 | -1.13E+01 | 1.13E+01 |
| ENSMUSG00000096054 | Syne1         | 4.49E-01 | -2.23E+00 | -1.16 | 0.0387 | -1.13E+01 | 1.13E+01 |
| ENSMUSG00000014303 | Glis2         | 4.80E-01 | -2.08E+00 | -1.06 | 0.0339 | -1.13E+01 | 1.13E+01 |
| ENSMUSG00000105895 | RP23-40716.2  | 2.15E+00 | 2.15E+00  | 1.10  | 0.0360 | 1.13E+01  | 1.13E+01 |
| ENSMUSG00000054404 | Slfn5         | 4.46E-01 | -2.24E+00 | -1.16 | 0.0393 | -1.13E+01 | 1.13E+01 |
| ENSMUSG00000038576 | Susd4         | 4.44E-01 | -2.25E+00 | -1.17 | 0.0397 | -1.13E+01 | 1.13E+01 |
| ENSMUSG00000085204 | Gm15327       | 2.23E+00 | 2.23E+00  | 1.16  | 0.0391 | 1.13E+01  | 1.13E+01 |
| ENSMUSG00000055691 | Gja6          | 4.26E-01 | -2.35E+00 | -1.23 | 0.0434 | -1.13E+01 | 1.13E+01 |
| ENSMUSG00000045193 | Cirbp         | 2.32E+00 | 2.32E+00  | 1.21  | 0.0425 | 1.13E+01  | 1.13E+01 |
| ENSMUSG00000086785 | Gm6081        | 4.26E-01 | -2.35E+00 | -1.23 | 0.0434 | -1.13E+01 | 1.13E+01 |
| ENSMUSG00000031775 | Pllp          | 4.49E-01 | -2.23E+00 | -1.15 | 0.0392 | -1.12E+01 | 1.12E+01 |
| ENSMUSG00000038403 | Hfe2          | 4.59E-01 | -2.18E+00 | -1.12 | 0.0376 | -1.12E+01 | 1.12E+01 |
| ENSMUSG00000007480 | Mc5r          | 2.50E+00 | 2.50E+00  | 1.32  | 0.0495 | 1.12E+01  | 1.12E+01 |
| ENSMUSG00000045094 | Arhgef37      | 2.47E+00 | 2.47E+00  | 1.30  | 0.0483 | 1.12E+01  | 1.12E+01 |
| ENSMUSG00000060509 | Xcr1          | 4.02E-01 | -2.48E+00 | -1.31 | 0.0494 | -1.12E+01 | 1.12E+01 |
| ENSMUSG00000087256 | Gm15990       | 2.42E+00 | 2.42E+00  | 1.27  | 0.0468 | 1.12E+01  | 1.12E+01 |
| ENSMUSG00000042116 | Vwa1          | 4.52E-01 | -2.21E+00 | -1.15 | 0.0393 | -1.12E+01 | 1.12E+01 |
| ENSMUSG00000044258 | Ctla2a        | 2.48E+00 | 2.48E+00  | 1.31  | 0.0493 | 1.12E+01  | 1.12E+01 |
| ENSMUSG00000047658 | Gal3st3       | 2.30E+00 | 2.30E+00  | 1.20  | 0.0426 | 1.11E+01  | 1.11E+01 |
| ENSMUSG00000087475 | 4933406118Rik | 2.04E+00 | 2.04E+00  | 1.03  | 0.0338 | 1.11E+01  | 1.11E+01 |
| ENSMUSG00000013584 | Aldh1a2       | 4.85E-01 | -2.06E+00 | -1.04 | 0.0345 | -1.11E+01 | 1.11E+01 |
| ENSMUSG00000023959 | Clic5         | 4.83E-01 | -2.07E+00 | -1.05 | 0.0348 | -1.11E+01 | 1.11E+01 |
| ENSMUSG00000098201 | Gm26983       | 4.28E-01 | -2.34E+00 | -1.23 | 0.0445 | -1.11E+01 | 1.11E+01 |
| ENSMUSG00000031886 | Ces2e         | 4.65E-01 | -2.15E+00 | -1.10 | 0.0376 | -1.11E+01 | 1.11E+01 |
| ENSMUSG00000086434 | Gm15200       | 2.01E+00 | 2.01E+00  | 1.00  | 0.0329 | 1.11E+01  | 1.11E+01 |
| ENSMUSG00000045467 | Ttll13        | 2.35E+00 | 2.35E+00  | 1.23  | 0.0451 | 1.11E+01  | 1.11E+01 |
| ENSMUSG00000086279 | Gm15634       | 4.54E-01 | -2.20E+00 | -1.14 | 0.0398 | -1.11E+01 | 1.11E+01 |
| ENSMUSG00000002341 | Ncan          | 2.17E+00 | 2.17E+00  | 1.12  | 0.0384 | 1.11E+01  | 1.11E+01 |
| ENSMUSG00000035275 | Raver2        | 4.93E-01 | -2.03E+00 | -1.02 | 0.0338 | -1.10E+01 | 1.10E+01 |
| ENSMUSG00000031904 | Slc7a6        | 2.23E+00 | 2.23E+00  | 1.16  | 0.0413 | 1.10E+01  | 1.10E+01 |
| ENSMUSG00000106251 | RP24-503L4.4  | 2.20E+00 | 2.20E+00  | 1.14  | 0.0403 | 1.10E+01  | 1.10E+01 |
| ENSMUSG00000106337 | RP23-358D12.2 | 4.50E-01 | -2.22E+00 | -1.15 | 0.0411 | -1.10E+01 | 1.10E+01 |
| ENSMUSG00000033684 | Qsox1         | 2.24E+00 | 2.24E+00  | 1.16  | 0.0419 | 1.10E+01  | 1.10E+01 |
| ENSMUSG00000105485 | RP23-342M4.3  | 4.13E-01 | -2.42E+00 | -1.28 | 0.0490 | -1.10E+01 | 1.10E+01 |
| ENSMUSG00000079889 | Gm11951       | 2.43E+00 | 2.43E+00  | 1.28  | 0.0492 | 1.09E+01  | 1.09E+01 |
| ENSMUSG00000104052 | Gm38125       | 4.83E-01 | -2.07E+00 | -1.05 | 0.0359 | -1.09E+01 | 1.09E+01 |
| ENSMUSG00000088875 | Gm25862       | 2.25E+00 | 2.25E+00  | 1.17  | 0.0426 | 1.09E+01  | 1.09E+01 |
| ENSMUSG00000080747 | Gm14016       | 2.04E+00 | 2.04E+00  | 1.03  | 0.0352 | 1.09E+01  | 1.09E+01 |
| ENSMUSG00000018727 | Cpsf4l        | 4.59E-01 | -2.18E+00 | -1.12 | 0.0401 | -1.09E+01 | 1.09E+01 |
| ENSMUSG00000104524 | Gm37333       | 4.50E-01 | -2.22E+00 | -1.15 | 0.0417 | -1.09E+01 | 1.09E+01 |
| ENSMUSG00000014426 | Map3k4        | 4.81E-01 | -2.08E+00 | -1.06 | 0.0366 | -1.09E+01 | 1.09E+01 |
| ENSMUSG00000048603 | Gm9828        | 2.19E+00 | 2.19E+00  | 1.13  | 0.0407 | 1.09E+01  | 1.09E+01 |
| ENSMUSG00000049744 | Arhgap15      | 2.22E+00 | 2.22E+00  | 1.15  | 0.0417 | 1.09E+01  | 1.09E+01 |
| ENSMUSG00000106673 | RP23-319P12.3 | 4.72E-01 | -2.12E+00 | -1.08 | 0.0381 | -1.09E+01 | 1.09E+01 |
| ENSMUSG00000100707 | Gm28523       | 4.32E-01 | -2.31E+00 | -1.21 | 0.0454 | -1.09E+01 | 1.09E+01 |
| ENSMUSG00000030157 | Clec2d        | 4.47E-01 | -2.24E+00 | -1.16 | 0.0425 | -1.09E+01 | 1.09E+01 |
| ENSMUSG00000022479 | Vdr           | 2.25E+00 | 2.25E+00  | 1.17  | 0.0434 | 1.08E+01  | 1.08E+01 |
| ENSMUSG00000053644 | Aldh7a1       | 4.26E-01 | -2.35E+00 | -1.23 | 0.0471 | -1.08E+01 | 1.08E+01 |
| ENSMUSG00000054966 | Lmntd1        | 4.55E-01 | -2.20E+00 | -1.14 | 0.0414 | -1.08E+01 | 1.08E+01 |
| ENSMUSG00000090778 | Gm3235        | 4.74E-01 | -2.11E+00 | -1.08 | 0.0384 | -1.08E+01 | 1.08E+01 |
| ENSMUSG00000073002 | Vamp5         | 4.63E-01 | -2.16E+00 | -1.11 | 0.0406 | -1.07E+01 | 1.07E+01 |
| ENSMUSG00000020744 | Slc25a19      | 4.98E-01 | -2.01E+00 | -1.01 | 0.0351 | -1.07E+01 | 1.07E+01 |
| ENSMUSG00000022836 | Mylk          | 4.76E-01 | -2.10E+00 | -1.07 | 0.0386 | -1.07E+01 | 1.07E+01 |
| ENSMUSG00000073492 | Gm10521       | 2.20E+00 | 2.20E+00  | 1.14  | 0.0424 | 1.07E+01  | 1.07E+01 |
| ENSMUSG00000021120 | Pigh          | 4.68E-01 | -2.14E+00 | -1.09 | 0.0401 | -1.07E+01 | 1.07E+01 |
| ENSMUSG00000030782 | Tgfb1i1       | 4.61E-01 | -2.17E+00 | -1.12 | 0.0414 | -1.06E+01 | 1.06E+01 |
| ENSMUSG00000099419 | 1700001D01Rik | 4.27E-01 | -2.34E+00 | -1.23 | 0.0488 | -1.06E+01 | 1.06E+01 |

|                    |               |          |           |       |        |           |          |
|--------------------|---------------|----------|-----------|-------|--------|-----------|----------|
| ENSMUSG00000004347 | Pde1c         | 4.61E-01 | -2.17E+00 | -1.12 | 0.0420 | -1.06E+01 | 1.06E+01 |
| ENSMUSG00000057897 | Camk2b        | 2.15E+00 | 2.15E+00  | 1.10  | 0.0412 | 1.06E+01  | 1.06E+01 |
| ENSMUSG00000040621 | Gemin8        | 4.40E-01 | -2.27E+00 | -1.18 | 0.0465 | -1.05E+01 | 1.05E+01 |
| ENSMUSG00000004098 | Col5a3        | 4.34E-01 | -2.30E+00 | -1.20 | 0.0480 | -1.05E+01 | 1.05E+01 |
| ENSMUSG00000087403 | Kantr         | 4.47E-01 | -2.24E+00 | -1.16 | 0.0453 | -1.05E+01 | 1.05E+01 |
| ENSMUSG00000040717 | Il17rd        | 4.67E-01 | -2.14E+00 | -1.10 | 0.0416 | -1.05E+01 | 1.05E+01 |
| ENSMUSG00000041773 | Enc1          | 2.31E+00 | 2.31E+00  | 1.21  | 0.0484 | 1.05E+01  | 1.05E+01 |
| ENSMUSG00000008384 | Sertad1       | 2.29E+00 | 2.29E+00  | 1.20  | 0.0478 | 1.05E+01  | 1.05E+01 |
| ENSMUSG00000020638 | Cmpk2         | 4.43E-01 | -2.26E+00 | -1.17 | 0.0465 | -1.05E+01 | 1.05E+01 |
| ENSMUSG00000030515 | Tarsl2        | 4.65E-01 | -2.15E+00 | -1.11 | 0.0423 | -1.05E+01 | 1.05E+01 |
| ENSMUSG00000024085 | Man2a1        | 2.29E+00 | 2.29E+00  | 1.20  | 0.0482 | 1.04E+01  | 1.04E+01 |
| ENSMUSG00000090387 | Gm17056       | 2.28E+00 | 2.28E+00  | 1.19  | 0.0477 | 1.04E+01  | 1.04E+01 |
| ENSMUSG00000028040 | Efna4         | 2.30E+00 | 2.30E+00  | 1.20  | 0.0488 | 1.04E+01  | 1.04E+01 |
| ENSMUSG00000034324 | Tmem132c      | 4.36E-01 | -2.29E+00 | -1.20 | 0.0486 | -1.04E+01 | 1.04E+01 |
| ENSMUSG00000074577 | Fam65c        | 2.21E+00 | 2.21E+00  | 1.14  | 0.0454 | 1.04E+01  | 1.04E+01 |
| ENSMUSG00000104066 | Gm37955       | 4.62E-01 | -2.17E+00 | -1.12 | 0.0437 | -1.04E+01 | 1.04E+01 |
| ENSMUSG00000035759 | Bbs10         | 4.65E-01 | -2.15E+00 | -1.11 | 0.0434 | -1.03E+01 | 1.03E+01 |
| ENSMUSG00000060771 | Tsga10        | 4.65E-01 | -2.15E+00 | -1.10 | 0.0434 | -1.03E+01 | 1.03E+01 |
| ENSMUSG00000027950 | Chrn2         | 2.30E+00 | 2.30E+00  | 1.20  | 0.0499 | 1.03E+01  | 1.03E+01 |
| ENSMUSG00000002845 | Tmem39a       | 2.06E+00 | 2.06E+00  | 1.04  | 0.0400 | 1.03E+01  | 1.03E+01 |
| ENSMUSG00000102142 | Gm26930       | 4.49E-01 | -2.23E+00 | -1.16 | 0.0471 | -1.03E+01 | 1.03E+01 |
| ENSMUSG00000081648 | Gm13423       | 2.15E+00 | 2.15E+00  | 1.11  | 0.0442 | 1.02E+01  | 1.02E+01 |
| ENSMUSG00000090141 | Gm614         | 2.02E+00 | 2.02E+00  | 1.02  | 0.0391 | 1.02E+01  | 1.02E+01 |
| ENSMUSG00000032105 | Pdzd3         | 2.02E+00 | 2.02E+00  | 1.01  | 0.0390 | 1.02E+01  | 1.02E+01 |
| ENSMUSG00000090685 | Gm9047        | 2.13E+00 | 2.13E+00  | 1.09  | 0.0436 | 1.02E+01  | 1.02E+01 |
| ENSMUSG00000043110 | Lrrn4         | 4.82E-01 | -2.08E+00 | -1.05 | 0.0414 | -1.02E+01 | 1.02E+01 |
| ENSMUSG00000024426 | Atat1         | 4.87E-01 | -2.05E+00 | -1.04 | 0.0406 | -1.02E+01 | 1.02E+01 |
| ENSMUSG00000081801 | Dnmt3l-ps1    | 2.02E+00 | 2.02E+00  | 1.01  | 0.0392 | 1.02E+01  | 1.02E+01 |
| ENSMUSG00000083771 | Gm15988       | 4.54E-01 | -2.20E+00 | -1.14 | 0.0476 | -1.01E+01 | 1.01E+01 |
| ENSMUSG00000023939 | Mrpl14        | 4.95E-01 | -2.02E+00 | -1.01 | 0.0400 | -1.01E+01 | 1.01E+01 |
| ENSMUSG00000098488 | Pla2g4b       | 2.20E+00 | 2.20E+00  | 1.14  | 0.0479 | 1.01E+01  | 1.01E+01 |
| ENSMUSG00000023795 | Pisd-ps2      | 4.80E-01 | -2.09E+00 | -1.06 | 0.0432 | -1.00E+01 | 1.00E+01 |
| ENSMUSG00000083013 | Gm12978       | 4.49E-01 | -2.23E+00 | -1.15 | 0.0495 | -1.00E+01 | 1.00E+01 |
| ENSMUSG00000005465 | Il27ra        | 4.80E-01 | -2.08E+00 | -1.06 | 0.0435 | -9.99E+00 | 9.99E+00 |
| ENSMUSG00000038065 | Mturn         | 4.91E-01 | -2.04E+00 | -1.03 | 0.0417 | -9.98E+00 | 9.98E+00 |
| ENSMUSG00000022286 | Grhl2         | 4.64E-01 | -2.15E+00 | -1.11 | 0.0470 | -9.93E+00 | 9.93E+00 |
| ENSMUSG00000062284 | Gm6030        | 2.12E+00 | 2.12E+00  | 1.09  | 0.0462 | 9.88E+00  | 9.88E+00 |
| ENSMUSG00000022439 | Parvg         | 2.08E+00 | 2.08E+00  | 1.06  | 0.0447 | 9.84E+00  | 9.84E+00 |
| ENSMUSG00000039252 | Lgi2          | 4.89E-01 | -2.05E+00 | -1.03 | 0.0433 | -9.83E+00 | 9.83E+00 |
| ENSMUSG00000086992 | Gm15941       | 4.60E-01 | -2.17E+00 | -1.12 | 0.0492 | -9.80E+00 | 9.80E+00 |
| ENSMUSG00000004500 | Zfp324        | 4.92E-01 | -2.03E+00 | -1.02 | 0.0432 | -9.79E+00 | 9.79E+00 |
| ENSMUSG00000105864 | RP23-407F12.1 | 4.70E-01 | -2.13E+00 | -1.09 | 0.0474 | -9.77E+00 | 9.77E+00 |
| ENSMUSG00000022763 | Aifm3         | 4.68E-01 | -2.14E+00 | -1.10 | 0.0481 | -9.74E+00 | 9.74E+00 |
| ENSMUSG00000025171 | Ubt1          | 2.03E+00 | 2.03E+00  | 1.02  | 0.0439 | 9.71E+00  | 9.71E+00 |
| ENSMUSG00000052974 | Cyp2f2        | 4.86E-01 | -2.06E+00 | -1.04 | 0.0453 | -9.68E+00 | 9.68E+00 |
| ENSMUSG00000067424 | Zfp563        | 4.84E-01 | -2.06E+00 | -1.05 | 0.0456 | -9.67E+00 | 9.67E+00 |
| ENSMUSG00000090231 | Cfb           | 2.03E+00 | 2.03E+00  | 1.02  | 0.0445 | 9.64E+00  | 9.64E+00 |
| ENSMUSG00000104145 | D130019J16Rik | 4.79E-01 | -2.09E+00 | -1.06 | 0.0469 | -9.63E+00 | 9.63E+00 |
| ENSMUSG00000032278 | Paqr5         | 4.99E-01 | -2.00E+00 | -1.00 | 0.0442 | -9.54E+00 | 9.54E+00 |
| ENSMUSG00000036962 | Cfap221       | 4.90E-01 | -2.04E+00 | -1.03 | 0.0460 | -9.52E+00 | 9.52E+00 |
| ENSMUSG00000015647 | Lama5         | 2.02E+00 | 2.02E+00  | 1.01  | 0.0448 | 9.52E+00  | 9.52E+00 |
| ENSMUSG00000037101 | Ttc29         | 4.91E-01 | -2.04E+00 | -1.03 | 0.0461 | -9.48E+00 | 9.48E+00 |
| ENSMUSG00000038506 | Dcun1d2       | 4.95E-01 | -2.02E+00 | -1.01 | 0.0457 | -9.45E+00 | 9.45E+00 |
| ENSMUSG00000003934 | Efnb3         | 2.06E+00 | 2.06E+00  | 1.04  | 0.0473 | 9.45E+00  | 9.45E+00 |
| ENSMUSG00000022496 | Tnfrsf17      | 4.85E-01 | -2.06E+00 | -1.04 | 0.0482 | -9.40E+00 | 9.40E+00 |
| ENSMUSG00000024654 | Asrgl1        | 2.09E+00 | 2.09E+00  | 1.06  | 0.0494 | 9.38E+00  | 9.38E+00 |
| ENSMUSG00000044952 | Kctd21        | 4.87E-01 | -2.06E+00 | -1.04 | 0.0484 | -9.34E+00 | 9.34E+00 |
| ENSMUSG00000051373 | Ppapdc3       | 4.85E-01 | -2.06E+00 | -1.04 | 0.0491 | -9.31E+00 | 9.31E+00 |
| ENSMUSG00000000318 | Clec10a       | 2.02E+00 | 2.02E+00  | 1.01  | 0.0482 | 9.20E+00  | 9.20E+00 |
| ENSMUSG00000024132 | Eci1          | 4.95E-01 | -2.02E+00 | -1.02 | 0.0487 | -9.16E+00 | 9.16E+00 |
| ENSMUSG00000033327 | Tnxb          | 4.97E-01 | -2.01E+00 | -1.01 | 0.0490 | -9.08E+00 | 9.08E+00 |
