# Supplementary material for: Aging-regulated PNUTS maintains endothelial barrier function via SEMA3B suppression
Source: PubMed Central journal article supplement (PMC11076560; doi:10.1038/s42003-024-06230-5), 2024-05-07
Supplement: 42003_2024_6230_MOESM5_ESM.pdf [file 42003_2024_6230_MOESM5_ESM.pdf]

**Table S2: RNA sequencing siPNUTS (KD) vs siControl (Ctr) HUVECs**

| ID               | names         | Ratio KD/Ctr | Fold change KD/Ctr | log2Ratio | PValue    | R-factor  | Abs R    |
|------------------|---------------|--------------|--------------------|-----------|-----------|-----------|----------|
| ENSG00000007314  | SCN4A         | 842.06       | 842.06             | 9.72      | 0.00E+00  | #iDIV/0!  | #iDIV/0! |
| ENSG00000198691  | ABCA4         | 15.79        | 15.79              | 3.98      | 3.43E-164 | 8.52E+82  | 8.52E+82 |
| ENSG00000144821  | MYH15         | 21.65        | 21.65              | 4.44      | 3.63E-155 | 3.59E+78  | 3.59E+78 |
| ENSG00000161281  | COX7A1        | 0.04         | -23.73             | -4.57     | 1.24E-154 | -2.13E+78 | 2.13E+78 |
| ENSG00000111405  | ENDOU         | 414.24       | 414.24             | 8.69      | 5.25E-151 | 5.72E+77  | 5.72E+77 |
| ENSG00000255202  | RP4-541C22.5  | 122.38       | 122.38             | 6.94      | 1.52E-151 | 3.14E+77  | 3.14E+77 |
| ENSG00000002079  | MYH16         | 37.46        | 37.46              | 5.23      | 5.53E-148 | 1.59E+75  | 1.59E+75 |
| ENSG00000105825  | TFPI2         | 0.11         | -9.22              | -3.20     | 1.61E-144 | -7.27E+72 | 7.27E+72 |
| ENSG00000244242  | IFITM10       | 56.03        | 56.03              | 5.81      | 4.38E-139 | 8.47E+70  | 8.47E+70 |
| ENSG00000135436  | FAM186B       | 143.84       | 143.84             | 7.17      | 5.34E-137 | 1.97E+70  | 1.97E+70 |
| ENSG00000103490  | PYCARD        | 0.05         | -19.75             | -4.30     | 3.01E-130 | -1.14E+66 | 1.14E+66 |
| ENSG000000012171 | SEMA3B        | 40.03        | 40.03              | 5.32      | 9.87E-128 | 1.27E+65  | 1.27E+65 |
| ENSG00000110876  | SELPLG        | 39.40        | 39.40              | 5.30      | 7.06E-125 | 4.69E+63  | 4.69E+63 |
| ENSG00000248187  | RP11-184M15.1 | 0.06         | -15.42             | -3.95     | 1.63E-122 | -1.21E+62 | 1.21E+62 |
| ENSG00000065618  | COL17A1       | 7.99         | 7.99               | 3.00      | 2.38E-122 | 5.18E+61  | 5.18E+61 |
| ENSG00000197558  | SSPO          | 62.50        | 62.50              | 5.97      | 2.91E-120 | 3.66E+61  | 3.66E+61 |
| ENSG00000169418  | NPR1          | 0.10         | -10.18             | -3.35     | 2.78E-121 | -1.93E+61 | 1.93E+61 |
| ENSG00000203814  | HIST2H2BF     | 0.13         | -7.69              | -2.94     | 3.54E-119 | -1.29E+60 | 1.29E+60 |
| ENSG00000107611  | CUBN          | 8.35         | 8.35               | 3.06      | 1.15E-117 | 2.47E+59  | 2.47E+59 |
| ENSG00000253741  | CTD-2292P10.4 | 38.49        | 38.49              | 5.27      | 2.68E-112 | 2.35E+57  | 2.35E+57 |
| ENSG00000183091  | NEB           | 16.08        | 16.08              | 4.01      | 1.67E-110 | 1.25E+56  | 1.25E+56 |
| ENSG00000146469  | VIP           | 20.59        | 20.59              | 4.36      | 7.89E-110 | 7.33E+55  | 7.33E+55 |
| ENSG00000151023  | ENKUR         | 76.68        | 76.68              | 6.26      | 2.89E-108 | 4.51E+55  | 4.51E+55 |
| ENSG00000243710  | WDR65         | 10.75        | 10.75              | 3.43      | 6.05E-108 | 4.37E+54  | 4.37E+54 |
| ENSG00000105499  | PLA2G4C       | 8.93         | 8.93               | 3.16      | 1.28E-106 | 7.89E+53  | 7.89E+53 |
| ENSG00000204947  | ZNF425        | 8.71         | 8.71               | 3.12      | 6.06E-102 | 3.54E+51  | 3.54E+51 |
| ENSG00000157343  | ARMC12        | 53.06        | 53.06              | 5.73      | 7.24E-100 | 1.97E+51  | 1.97E+51 |
| ENSG00000154734  | ADAMTS1       | 0.18         | -5.54              | -2.47     | 3.63E-101 | -9.20E+50 | 9.20E+50 |
| ENSG00000178445  | GLDC          | 5.60         | 5.60               | 2.48      | 1.37E-100 | 4.77E+50  | 4.77E+50 |
| ENSG00000109193  | SULT1E1       | 0.12         | -8.42              | -3.07     | 6.91E-100 | -3.20E+50 | 3.20E+50 |
| ENSG00000114270  | COL7A1        | 28.41        | 28.41              | 4.83      | 1.05E-97  | 8.77E+49  | 8.77E+49 |
| ENSG00000100342  | APOL1         | 0.05         | -19.60             | -4.29     | 1.80E-96  | -1.46E+49 | 1.46E+49 |
| ENSG00000154864  | PIEZO2        | 0.17         | -6.02              | -2.59     | 7.65E-96  | -2.18E+48 | 2.18E+48 |
| ENSG00000279686  | ECSCR         | 0.18         | -5.62              | -2.49     | 2.70E-94  | -3.42E+47 | 3.42E+47 |
| ENSG00000246898  | CTD-2258A20.4 | 10.03        | 10.03              | 3.33      | 2.52E-92  | 6.31E+46  | 6.31E+46 |
| ENSG00000163491  | NEK10         | 7.28         | 7.28               | 2.86      | 4.97E-92  | 3.26E+46  | 3.26E+46 |
| ENSG00000068079  | IFI35         | 0.05         | -19.45             | -4.28     | 7.35E-91  | -2.27E+46 | 2.27E+46 |
| ENSG00000221843  | C2orf16       | 23.58        | 23.58              | 4.56      | 7.10E-90  | 8.85E+45  | 8.85E+45 |
| ENSG00000264954  | RP11-214C8.2  | 15.79        | 15.79              | 3.98      | 2.34E-89  | 3.26E+45  | 3.26E+45 |
| ENSG00000241399  | CD302         | 0.17         | -5.93              | -2.57     | 9.50E-90  | -1.92E+45 | 1.92E+45 |
| ENSG00000174059  | CD34          | 5.03         | 5.03               | 2.33      | 7.33E-90  | 1.86E+45  | 1.86E+45 |
| ENSG00000228857  | AC104653.1    | 54.75        | 54.75              | 5.77      | 1.29E-87  | 1.53E+45  | 1.53E+45 |
| ENSG00000050344  | NFE2L3        | 0.18         | -5.53              | -2.47     | 3.24E-89  | -9.72E+44 | 9.72E+44 |
| ENSG00000169692  | AGPAT2        | 0.09         | -11.43             | -3.51     | 1.67E-88  | -8.84E+44 | 8.84E+44 |
| ENSG00000178852  | EFCAB13       | 5.87         | 5.87               | 2.55      | 1.99E-88  | 4.16E+44  | 4.16E+44 |
| ENSG00000138449  | SLC40A1       | 0.17         | -5.84              | -2.55     | 4.33E-86  | -2.81E+43 | 2.81E+43 |
| ENSG00000108515  | ENO3          | 13.25        | 13.25              | 3.73      | 7.29E-85  | 1.55E+43  | 1.55E+43 |
| ENSG00000113600  | C9            | 61.66        | 61.66              | 5.95      | 7.32E-83  | 7.21E+42  | 7.21E+42 |
| ENSG00000226496  | LINC00323     | 33.48        | 33.48              | 5.07      | 8.47E-83  | 3.64E+42  | 3.64E+42 |
| ENSG00000042832  | TG            | 33.90        | 33.90              | 5.08      | 1.41E-82  | 2.85E+42  | 2.85E+42 |
| ENSG00000163814  | CDCP1         | 4.91         | 4.91               | 2.30      | 1.70E-81  | 1.19E+41  | 1.19E+41 |
| ENSG00000113555  | PCDH12        | 4.43         | 4.43               | 2.15      | 8.62E-80  | 1.51E+40  | 1.51E+40 |
| ENSG00000197409  | HIST1H3D      | 0.20         | -4.91              | -2.30     | 1.37E-79  | -1.33E+40 | 1.33E+40 |
| ENSG00000115594  | IL1R1         | 0.21         | -4.71              | -2.24     | 6.69E-79  | -5.76E+39 | 5.76E+39 |
| ENSG00000110675  | ELMOD1        | 0.22         | -4.60              | -2.20     | 6.83E-79  | -5.57E+39 | 5.57E+39 |
| ENSG00000266680  | RP5-1148A21.3 | 7.57         | 7.57               | 2.92      | 2.05E-78  | 5.29E+39  | 5.29E+39 |
| ENSG00000213344  | PCNPP3        | 20.61        | 20.61              | 4.37      | 2.03E-77  | 4.58E+39  | 4.58E+39 |
| ENSG00000154134  | ROBO3         | 0.10         | -10.15             | -3.34     | 6.53E-77  | -1.26E+39 | 1.26E+39 |
| ENSG00000274911  | RP11-12A20.7  | 7.41         | 7.41               | 2.89      | 4.08E-77  | 1.16E+39  | 1.16E+39 |
| ENSG00000167874  | TMEM88        | 0.12         | -8.57              | -3.10     | 6.50E-76  | -3.36E+38 | 3.36E+38 |
| ENSG00000115602  | IL1RL1        | 0.22         | -4.64              | -2.21     | 3.64E-76  | -2.43E+38 | 2.43E+38 |
| ENSG00000184270  | HIST2H2AB     | 0.22         | -4.57              | -2.19     | 2.19E-75  | -9.76E+37 | 9.76E+37 |
| ENSG00000122861  | PLAU          | 4.70         | 4.70               | 2.23      | 2.35E-75  | 9.70E+37  | 9.70E+37 |
| ENSG00000143107  | FNDC7         | 375.95       | 375.95             | 8.55      | 2.27E-71  | 7.89E+37  | 7.89E+37 |
| ENSG00000102575  | ACP5          | 0.03         | -32.84             | -5.04     | 2.92E-73  | -6.08E+37 | 6.08E+37 |
| ENSG00000124875  | CXCL6         | 0.15         | -6.60              | -2.72     | 1.50E-73  | -1.71E+37 | 1.71E+37 |
| ENSG00000198910  | L1CAM         | 158.40       | 158.40             | 7.31      | 1.59E-69  | 3.98E+36  | 3.98E+36 |
| ENSG00000135452  | TSPAN31       | 0.19         | -5.27              | -2.40     | 3.84E-72  | -2.69E+36 | 2.69E+36 |
| ENSG00000168679  | SLC16A4       | 0.10         | -9.71              | -3.28     | 1.82E-71  | -2.28E+36 | 2.28E+36 |
| ENSG00000170323  | FABP4         | 0.16         | -6.14              | -2.62     | 1.10E-70  | -5.86E+35 | 5.86E+35 |
| ENSG00000072952  | MRVI1         | 7.76         | 7.76               | 2.96      | 4.92E-70  | 3.50E+35  | 3.50E+35 |
| ENSG00000189221  | MAOA          | 0.25         | -4.00              | -2.00     | 3.51E-70  | -2.13E+35 | 2.13E+35 |
| ENSG00000196569  | LAMA2         | 7.07         | 7.07               | 2.82      | 1.31E-69  | 1.95E+35  | 1.95E+35 |
| ENSG00000163739  | CXCL1         | 0.25         | -3.95              | -1.98     | 6.20E-70  | -1.59E+35 | 1.59E+35 |
| ENSG00000163810  | TGM4          | 14.55        | 14.55              | 3.86      | 9.94E-69  | 1.46E+35  | 1.46E+35 |
| ENSG00000146674  | IGFBP3        | 0.05         | -19.65             | -4.30     | 3.34E-68  | -1.08E+35 | 1.08E+35 |

|                  |                |       |        |       |          |           |          |
|------------------|----------------|-------|--------|-------|----------|-----------|----------|
| ENSG00000179168  | GGN            | 13.71 | 13.71  | 3.78  | 4.40E-68 | 6.54E+34  | 6.54E+34 |
| ENSG00000186283  | TOR3A          | 0.20  | -4.95  | -2.31 | 6.54E-69 | -6.13E+34 | 6.13E+34 |
| ENSG00000168490  | PHYHIP         | 7.53  | 7.53   | 2.91  | 1.07E-66 | 7.28E+33  | 7.28E+33 |
| ENSG00000134575  | ACP2           | 0.23  | -4.36  | -2.12 | 7.83E-67 | -4.93E+33 | 4.93E+33 |
| ENSG00000082126  | MPP4           | 4.06  | 4.06   | 2.02  | 1.25E-66 | 3.63E+33  | 3.63E+33 |
| ENSG00000130783  | CCDC62         | 10.24 | 10.24  | 3.36  | 1.04E-65 | 3.18E+33  | 3.18E+33 |
| ENSG00000185291  | IL3RA          | 0.07  | -14.73 | -3.88 | 1.62E-64 | -1.16E+33 | 1.16E+33 |
| ENSG00000185432  | METTL7A        | 0.27  | -3.74  | -1.90 | 1.09E-65 | -1.13E+33 | 1.13E+33 |
| ENSG00000069812  | HES2           | 4.84  | 4.84   | 2.28  | 2.42E-65 | 9.83E+32  | 9.83E+32 |
| ENSG00000166670  | MMP10          | 5.49  | 5.49   | 2.46  | 7.02E-65 | 6.56E+32  | 6.56E+32 |
| ENSG00000139899  | CBLN3          | 7.96  | 7.96   | 2.99  | 2.31E-64 | 5.24E+32  | 5.24E+32 |
| ENSG00000186765  | FSCN2          | 77.47 | 77.47  | 6.28  | 3.05E-62 | 4.44E+32  | 4.44E+32 |
| ENSG00000138172  | CALHM2         | 0.17  | -5.79  | -2.53 | 1.91E-64 | -4.18E+32 | 4.18E+32 |
| ENSG00000085465  | OVGP1          | 13.93 | 13.93  | 3.80  | 2.20E-63 | 2.97E+32  | 2.97E+32 |
| ENSG00000167191  | GPRC5B         | 3.77  | 3.77   | 1.91  | 1.00E-63 | 1.19E+32  | 1.19E+32 |
| ENSG00000133110  | POSTN          | 0.03  | -32.60 | -5.03 | 1.60E-61 | -8.14E+31 | 8.14E+31 |
| ENSG00000246695  | RP11-877E17.2  | 4.88  | 4.88   | 2.29  | 5.14E-63 | 6.81E+31  | 6.81E+31 |
| ENSG00000169100  | SLC25A6        | 0.16  | -6.18  | -2.63 | 8.58E-63 | -6.67E+31 | 6.67E+31 |
| ENSG00000023839  | ABCC2          | 6.17  | 6.17   | 2.62  | 3.08E-62 | 3.51E+31  | 3.51E+31 |
| ENSG00000119630  | PGF            | 4.70  | 4.70   | 2.23  | 2.79E-62 | 2.82E+31  | 2.82E+31 |
| ENSG00000065413  | ANKRD44        | 4.36  | 4.36   | 2.13  | 3.77E-62 | 2.25E+31  | 2.25E+31 |
| ENSG00000265972  | TXNIP          | 0.22  | -4.48  | -2.16 | 5.11E-62 | -1.98E+31 | 1.98E+31 |
| ENSG00000125968  | ID1            | 0.28  | -3.58  | -1.84 | 3.52E-62 | -1.91E+31 | 1.91E+31 |
| ENSG00000227811  | RP4-773A18.4   | 9.00  | 9.00   | 3.17  | 3.38E-61 | 1.55E+31  | 1.55E+31 |
| ENSG00000140873  | ADAMTS18       | 0.23  | -4.29  | -2.10 | 2.18E-61 | -9.18E+30 | 9.18E+30 |
| ENSG00000188818  | ZDHHC11        | 27.11 | 27.11  | 4.76  | 9.27E-60 | 8.91E+30  | 8.91E+30 |
| ENSG00000188596  | C12orf55       | 5.48  | 5.48   | 2.45  | 5.17E-61 | 7.62E+30  | 7.62E+30 |
| ENSG00000260941  | LINC00622      | 13.39 | 13.39  | 3.74  | 3.94E-60 | 6.75E+30  | 6.75E+30 |
| ENSG00000133800  | LYVE1          | 0.23  | -4.43  | -2.15 | 4.60E-61 | -6.53E+30 | 6.53E+30 |
| ENSG00000175182  | FAM131A        | 0.24  | -4.22  | -2.08 | 5.76E-61 | -5.57E+30 | 5.57E+30 |
| ENSG00000185313  | SCN10A         | 27.35 | 27.35  | 4.77  | 3.49E-59 | 4.63E+30  | 4.63E+30 |
| ENSG000000089847 | ANKRD24        | 25.01 | 25.01  | 4.64  | 5.71E-59 | 3.31E+30  | 3.31E+30 |
| ENSG00000146678  | IGFBP1         | 0.14  | -7.33  | -2.87 | 5.08E-60 | -3.25E+30 | 3.25E+30 |
| ENSG00000116299  | KIAA1324       | 5.94  | 5.94   | 2.57  | 7.44E-60 | 2.18E+30  | 2.18E+30 |
| ENSG00000134245  | WNT2B          | 6.13  | 6.13   | 2.61  | 1.01E-59 | 1.93E+30  | 1.93E+30 |
| ENSG00000168477  | TNXB           | 30.32 | 30.32  | 4.92  | 3.62E-58 | 1.59E+30  | 1.59E+30 |
| ENSG00000167272  | POP5           | 0.23  | -4.36  | -2.12 | 1.76E-59 | -1.04E+30 | 1.04E+30 |
| ENSG00000169169  | CPT1C          | 0.24  | -4.09  | -2.03 | 2.11E-59 | -8.90E+29 | 8.90E+29 |
| ENSG00000135407  | AVIL           | 7.99  | 7.99   | 3.00  | 3.46E-58 | 4.30E+29  | 4.30E+29 |
| ENSG00000240929  | HIST2H2BB      | 0.16  | -6.43  | -2.69 | 2.26E-58 | -4.28E+29 | 4.28E+29 |
| ENSG00000123374  | CDK2           | 0.29  | -3.51  | -1.81 | 3.04E-58 | -2.01E+29 | 2.01E+29 |
| ENSG00000138185  | ENTPD1         | 0.29  | -3.49  | -1.80 | 3.27E-58 | -1.93E+29 | 1.93E+29 |
| ENSG00000232926  | AC000078.5     | 14.66 | 14.66  | 3.87  | 2.29E-56 | 9.68E+28  | 9.68E+28 |
| ENSG00000103024  | NME3           | 0.21  | -4.81  | -2.27 | 5.74E-57 | -6.34E+28 | 6.34E+28 |
| ENSG00000204482  | LST1           | 17.01 | 17.01  | 4.09  | 1.07E-55 | 5.19E+28  | 5.19E+28 |
| ENSG00000189060  | H1FO           | 0.23  | -4.39  | -2.13 | 8.23E-57 | -4.84E+28 | 4.84E+28 |
| ENSG00000154639  | CXADR          | 4.07  | 4.07   | 2.02  | 9.71E-57 | 4.13E+28  | 4.13E+28 |
| ENSG00000115129  | TP53I3         | 0.30  | -3.37  | -1.75 | 8.69E-57 | -3.62E+28 | 3.62E+28 |
| ENSG00000275379  | HIST1H3I       | 0.23  | -4.41  | -2.14 | 1.77E-56 | -3.31E+28 | 3.31E+28 |
| ENSG00000184381  | PLA2G6         | 6.11  | 6.11   | 2.61  | 4.83E-56 | 2.78E+28  | 2.78E+28 |
| ENSG00000129255  | MPDU1          | 0.29  | -3.42  | -1.78 | 1.61E-56 | -2.69E+28 | 2.69E+28 |
| ENSG00000136928  | GABBR2         | 0.29  | -3.44  | -1.78 | 5.00E-56 | -1.54E+28 | 1.54E+28 |
| ENSG00000140465  | CYP1A1         | 0.23  | -4.43  | -2.15 | 8.61E-56 | -1.51E+28 | 1.51E+28 |
| ENSG00000183598  | HIST2H3D       | 0.18  | -5.42  | -2.44 | 2.01E-55 | -1.21E+28 | 1.21E+28 |
| ENSG00000137434  | C6orf52        | 18.40 | 18.40  | 4.20  | 2.48E-54 | 1.17E+28  | 1.17E+28 |
| ENSG00000203818  | HIST2H3PS2     | 0.14  | -7.15  | -2.84 | 1.26E-54 | -6.37E+27 | 6.37E+27 |
| ENSG00000049769  | PPP1R3F        | 5.82  | 5.82   | 2.54  | 8.61E-55 | 6.27E+27  | 6.27E+27 |
| ENSG00000275713  | HIST1H2BH      | 0.27  | -3.73  | -1.90 | 4.19E-54 | -1.82E+27 | 1.82E+27 |
| ENSG00000102760  | RGCC           | 3.42  | 3.42   | 1.77  | 7.74E-54 | 1.23E+27  | 1.23E+27 |
| ENSG00000135480  | KRT7           | 4.33  | 4.33   | 2.12  | 1.34E-53 | 1.19E+27  | 1.19E+27 |
| ENSG00000125995  | ROMO1          | 0.28  | -3.63  | -1.86 | 1.21E-53 | -1.04E+27 | 1.04E+27 |
| ENSG00000171703  | TCEA2          | 3.66  | 3.66   | 1.87  | 4.22E-53 | 5.64E+26  | 5.64E+26 |
| ENSG00000164946  | FREM1          | 10.68 | 10.68  | 3.42  | 9.65E-52 | 3.44E+26  | 3.44E+26 |
| ENSG00000108846  | ABCC3          | 8.50  | 8.50   | 3.09  | 1.73E-51 | 2.05E+26  | 2.05E+26 |
| ENSG00000121966  | CXCR4          | 4.69  | 4.69   | 2.23  | 1.33E-51 | 1.29E+26  | 1.29E+26 |
| ENSG00000063127  | SLC6A16        | 11.98 | 11.98  | 3.58  | 1.58E-50 | 9.53E+25  | 9.53E+25 |
| ENSG00000125775  | SDCBP2         | 4.26  | 4.26   | 2.09  | 6.76E-51 | 5.18E+25  | 5.18E+25 |
| ENSG00000108379  | WNT3           | 4.15  | 4.15   | 2.05  | 8.36E-51 | 4.54E+25  | 4.54E+25 |
| ENSG00000257086  | RP11-783K16.13 | 5.97  | 5.97   | 2.58  | 2.04E-50 | 4.18E+25  | 4.18E+25 |
| ENSG00000188042  | ARL4C          | 5.34  | 5.34   | 2.42  | 2.77E-50 | 3.21E+25  | 3.21E+25 |
| ENSG00000156265  | C21orf7        | 3.93  | 3.93   | 1.97  | 1.75E-50 | 2.97E+25  | 2.97E+25 |
| ENSG00000262001  | DLGAP1-AS2     | 3.19  | 3.19   | 1.67  | 1.23E-50 | 2.87E+25  | 2.87E+25 |
| ENSG00000278637  | HIST1H4A       | 0.25  | -3.99  | -2.00 | 1.95E-50 | -2.86E+25 | 2.86E+25 |
| ENSG00000169604  | ANTXR1         | 4.60  | 4.60   | 2.20  | 5.73E-50 | 1.92E+25  | 1.92E+25 |
| ENSG00000149476  | DAK            | 3.57  | 3.57   | 1.84  | 1.61E-49 | 8.91E+24  | 8.91E+24 |
| ENSG00000112208  | BAG2           | 0.31  | -3.22  | -1.69 | 1.42E-49 | -8.54E+24 | 8.54E+24 |
| ENSG00000058085  | LAMC2          | 4.28  | 4.28   | 2.10  | 5.16E-49 | 5.96E+24  | 5.96E+24 |
| ENSG00000186854  | TRABD2A        | 9.59  | 9.59   | 3.26  | 3.20E-48 | 5.36E+24  | 5.36E+24 |
| ENSG00000113583  | C5orf15        | 0.30  | -3.36  | -1.75 | 6.04E-49 | -4.32E+24 | 4.32E+24 |

|                   |                |       |       |       |          |           |          |
|-------------------|----------------|-------|-------|-------|----------|-----------|----------|
| ENSG00000120437   | ACAT2          | 0.31  | -3.20 | -1.68 | 6.45E-49 | -3.98E+24 | 3.98E+24 |
| ENSG00000272167   | PROX1-AS1      | 8.36  | 8.36  | 3.06  | 5.46E-48 | 3.58E+24  | 3.58E+24 |
| ENSG00000272031   | ANKRD34A       | 8.95  | 8.95  | 3.16  | 6.59E-48 | 3.49E+24  | 3.49E+24 |
| ENSG00000134070   | IRAK2          | 3.24  | 3.24  | 1.70  | 1.58E-48 | 2.58E+24  | 2.58E+24 |
| ENSG00000185860   | C1orf110       | 3.92  | 3.92  | 1.97  | 2.69E-48 | 2.39E+24  | 2.39E+24 |
| ENSG00000134516   | DOCK2          | 5.16  | 5.16  | 2.37  | 6.47E-48 | 2.03E+24  | 2.03E+24 |
| ENSG00000010295   | IFFO1          | 0.26  | -3.90 | -1.96 | 4.82E-48 | -1.77E+24 | 1.77E+24 |
| ENSG00000232759   | AC002480.3     | 0.24  | -4.21 | -2.07 | 7.12E-48 | -1.58E+24 | 1.58E+24 |
| ENSG00000278828   | HIST1H3H       | 0.25  | -3.98 | -1.99 | 1.74E-47 | -9.53E+23 | 9.53E+23 |
| ENSG00000158373   | HIST1H2BD      | 0.26  | -3.78 | -1.92 | 3.55E-47 | -6.34E+23 | 6.34E+23 |
| ENSG00000185000   | DGAT1          | 0.26  | -3.86 | -1.95 | 4.81E-47 | -5.57E+23 | 5.57E+23 |
| ENSG00000091137   | SLC26A4        | 8.33  | 8.33  | 3.06  | 3.03E-46 | 4.78E+23  | 4.78E+23 |
| ENSG00000118777   | ABCG2          | 0.30  | -3.37 | -1.75 | 5.67E-47 | -4.47E+23 | 4.47E+23 |
| ENSG00000072778   | ACADVL         | 0.29  | -3.47 | -1.80 | 6.99E-47 | -4.15E+23 | 4.15E+23 |
| ENSG00000169715   | MT1E           | 0.29  | -3.44 | -1.78 | 7.16E-47 | -4.07E+23 | 4.07E+23 |
| ENSG00000196890   | HIST3H2BB      | 0.18  | -5.57 | -2.48 | 1.87E-46 | -4.07E+23 | 4.07E+23 |
| ENSG00000145476   | CYP4V2         | 5.38  | 5.38  | 2.43  | 3.41E-46 | 2.91E+23  | 2.91E+23 |
| ENSG00000187325   | TAF9B          | 0.26  | -3.81 | -1.93 | 1.81E-46 | -2.83E+23 | 2.83E+23 |
| ENSG00000240583   | AQP1           | 0.27  | -3.69 | -1.88 | 1.71E-46 | -2.82E+23 | 2.82E+23 |
| ENSG00000107821   | KAZALD1        | 6.29  | 6.29  | 2.65  | 5.64E-46 | 2.65E+23  | 2.65E+23 |
| ENSG00000158683   | PKD1L1         | 4.85  | 4.85  | 2.28  | 3.48E-46 | 2.60E+23  | 2.60E+23 |
| ENSG00000157653   | C9orf43        | 6.16  | 6.16  | 2.62  | 1.93E-45 | 1.40E+23  | 1.40E+23 |
| ENSG00000165092   | ALDH1A1        | 0.32  | -3.16 | -1.66 | 6.33E-46 | -1.25E+23 | 1.25E+23 |
| ENSG00000276180   | HIST1H4I       | 0.25  | -4.05 | -2.02 | 1.58E-45 | -1.02E+23 | 1.02E+23 |
| ENSG00000254860   | TMEM9B-AS1     | 7.77  | 7.77  | 2.96  | 2.31E-44 | 5.11E+22  | 5.11E+22 |
| ENSG00000204390   | HSPA1L         | 7.99  | 7.99  | 3.00  | 3.53E-44 | 4.26E+22  | 4.26E+22 |
| ENSG00000180198   | RCC1           | 3.13  | 3.13  | 1.64  | 8.44E-45 | 3.40E+22  | 3.40E+22 |
| ENSG00000103034   | NDRG4          | 0.35  | -2.89 | -1.53 | 8.39E-45 | -3.16E+22 | 3.16E+22 |
| ENSG00000082074   | FYB            | 22.95 | 22.95 | 4.52  | 7.73E-43 | 2.61E+22  | 2.61E+22 |
| ENSG00000227603   | RP11-165J3.6   | 16.47 | 16.47 | 4.04  | 5.25E-43 | 2.27E+22  | 2.27E+22 |
| ENSG00000172379   | ARNT2          | 13.27 | 13.27 | 3.73  | 4.84E-43 | 1.91E+22  | 1.91E+22 |
| ENSG00000153707   | PTPRD          | 0.34  | -2.92 | -1.55 | 2.73E-44 | -1.77E+22 | 1.77E+22 |
| ENSG00000234684   | SDCBP2-AS1     | 8.72  | 8.72  | 3.12  | 3.10E-43 | 1.57E+22  | 1.57E+22 |
| ENSG00000177675   | CD163L1        | 3.43  | 3.43  | 1.78  | 5.73E-44 | 1.43E+22  | 1.43E+22 |
| ENSG00000189050   | RNFT1          | 0.23  | -4.28 | -2.10 | 9.48E-44 | -1.39E+22 | 1.39E+22 |
| ENSG00000163661   | PTX3           | 0.28  | -3.58 | -1.84 | 7.68E-44 | -1.29E+22 | 1.29E+22 |
| ENSG00000160207   | HSF2BP         | 8.01  | 8.01  | 3.00  | 5.50E-43 | 1.08E+22  | 1.08E+22 |
| ENSG00000262814   | MRPL12         | 0.18  | -5.41 | -2.44 | 2.63E-43 | -1.05E+22 | 1.05E+22 |
| ENSG00000205981   | DNAJC19        | 0.33  | -3.06 | -1.61 | 1.22E-43 | -8.76E+21 | 8.76E+21 |
| ENSG00000160050   | CCDC28B        | 0.21  | -4.73 | -2.24 | 3.37E-43 | -8.14E+21 | 8.14E+21 |
| ENSG00000204311   | DFNB59         | 6.91  | 6.91  | 2.79  | 1.28E-42 | 6.10E+21  | 6.10E+21 |
| ENSG00000153094   | BCL2L11        | 3.41  | 3.41  | 1.77  | 3.24E-43 | 5.99E+21  | 5.99E+21 |
| ENSG00000221829   | FANCG          | 0.33  | -3.07 | -1.62 | 3.40E-43 | -5.27E+21 | 5.27E+21 |
| ENSG00000081087   | OSTM1          | 2.85  | 2.85  | 1.51  | 2.97E-43 | 5.23E+21  | 5.23E+21 |
| ENSG00000076554   | TPD52          | 0.30  | -3.35 | -1.74 | 4.12E-43 | -5.22E+21 | 5.22E+21 |
| ENSG00000244694   | PTCHD4         | 3.56  | 3.56  | 1.83  | 1.28E-42 | 3.14E+21  | 3.14E+21 |
| ENSG00000196611   | MMP1           | 4.19  | 4.19  | 2.07  | 1.81E-42 | 3.12E+21  | 3.12E+21 |
| ENSG00000111684   | LPCAT3         | 0.28  | -3.59 | -1.84 | 2.78E-42 | -2.15E+21 | 2.15E+21 |
| ENSG00000261253   | AC137932.6     | 7.99  | 7.99  | 3.00  | 3.30E-41 | 1.39E+21  | 1.39E+21 |
| ENSG00000125864   | BFSP1          | 3.23  | 3.23  | 1.69  | 1.52E-41 | 8.30E+20  | 8.30E+20 |
| ENSG00000172638   | EFEMP2         | 0.35  | -2.88 | -1.52 | 1.34E-41 | -7.85E+20 | 7.85E+20 |
| ENSG00000163584   | RPL22L1        | 0.31  | -3.21 | -1.68 | 1.74E-41 | -7.68E+20 | 7.68E+20 |
| ENSG00000204248   | COL11A2        | 10.09 | 10.09 | 3.34  | 2.71E-40 | 6.14E+20  | 6.14E+20 |
| ENSG00000067445   | TRO            | 0.29  | -3.43 | -1.78 | 4.52E-41 | -5.10E+20 | 5.10E+20 |
| ENSG00000196074   | SYCP2          | 10.73 | 10.73 | 3.42  | 4.91E-40 | 4.84E+20  | 4.84E+20 |
| ENSG00000129646   | QRICH2         | 4.21  | 4.21  | 2.07  | 8.12E-41 | 4.67E+20  | 4.67E+20 |
| ENSG00000273703   | HIST1H2BM      | 0.33  | -3.05 | -1.61 | 4.53E-41 | -4.53E+20 | 4.53E+20 |
| ENSG00000123689   | GOS2           | 0.24  | -4.25 | -2.09 | 9.66E-41 | -4.33E+20 | 4.33E+20 |
| ENSG00000261903.1 | RP1-59D14.6    | 6.91  | 6.91  | 2.79  | 3.01E-40 | 3.98E+20  | 3.98E+20 |
| ENSG00000126749   | EMG1           | 0.23  | -4.35 | -2.12 | 1.20E-40 | -3.97E+20 | 3.97E+20 |
| ENSG00000182179   | UBA7           | 0.31  | -3.18 | -1.67 | 6.99E-41 | -3.80E+20 | 3.80E+20 |
| ENSG00000277157   | HIST1H4D       | 0.33  | -3.01 | -1.59 | 1.46E-40 | -2.49E+20 | 2.49E+20 |
| ENSG00000142252   | GEMIN7         | 0.29  | -3.39 | -1.76 | 1.94E-40 | -2.43E+20 | 2.43E+20 |
| ENSG00000255775   | RP3-454B23.1   | 8.32  | 8.32  | 3.06  | 1.22E-39 | 2.38E+20  | 2.38E+20 |
| ENSG00000274290   | HIST1H2BE      | 0.33  | -3.02 | -1.59 | 2.06E-40 | -2.10E+20 | 2.10E+20 |
| ENSG00000175264   | CHST1          | 3.08  | 3.08  | 1.62  | 2.55E-40 | 1.93E+20  | 1.93E+20 |
| ENSG00000135414   | GDF11          | 0.28  | -3.62 | -1.86 | 4.30E-40 | -1.75E+20 | 1.75E+20 |
| ENSG00000137090   | DMRT1          | 6.24  | 6.24  | 2.64  | 1.33E-39 | 1.72E+20  | 1.72E+20 |
| ENSG00000163945   | UVSSA          | 3.31  | 3.31  | 1.72  | 5.54E-40 | 1.40E+20  | 1.40E+20 |
| ENSG00000184441   | AP001062.7     | 7.16  | 7.16  | 2.84  | 3.42E-39 | 1.22E+20  | 1.22E+20 |
| ENSG00000165511   | C10orf25       | 3.60  | 3.60  | 1.85  | 1.31E-39 | 9.96E+19  | 9.96E+19 |
| ENSG00000145247   | OCIAD2         | 3.03  | 3.03  | 1.60  | 1.59E-39 | 7.59E+19  | 7.59E+19 |
| ENSG00000113319   | RASGRF2        | 6.41  | 6.41  | 2.68  | 7.42E-39 | 7.44E+19  | 7.44E+19 |
| ENSG00000245648   | RP11-277P12.20 | 5.64  | 5.64  | 2.50  | 6.51E-39 | 6.99E+19  | 6.99E+19 |
| ENSG00000144354   | CDCA7          | 0.33  | -3.02 | -1.59 | 1.94E-39 | -6.86E+19 | 6.86E+19 |
| ENSG00000176697   | BDNF           | 0.24  | -4.09 | -2.03 | 3.61E-39 | -6.80E+19 | 6.80E+19 |
| ENSG00000236252   | RP11-15J10.8   | 9.63  | 9.63  | 3.27  | 2.38E-38 | 6.24E+19  | 6.24E+19 |
| ENSG00000267858   | AC016629.8     | 6.05  | 6.05  | 2.60  | 1.25E-38 | 5.41E+19  | 5.41E+19 |
| ENSG00000182257   | C22orf26       | 9.08  | 9.08  | 3.18  | 3.17E-38 | 5.10E+19  | 5.10E+19 |

|                 |               |       |       |       |          |           |          |
|-----------------|---------------|-------|-------|-------|----------|-----------|----------|
| ENSG00000257732 | RP11-818F20.5 | 5.76  | 5.76  | 2.53  | 1.30E-38 | 5.05E+19  | 5.05E+19 |
| ENSG00000132563 | REEP2         | 0.13  | -7.58 | -2.92 | 3.04E-38 | -4.35E+19 | 4.35E+19 |
| ENSG00000243587 | C6orf183      | 10.81 | 10.81 | 3.43  | 6.25E-38 | 4.32E+19  | 4.32E+19 |
| ENSG00000198832 | RP3-412A9.11  | 0.23  | -4.42 | -2.14 | 1.42E-38 | -3.71E+19 | 3.71E+19 |
| ENSG00000145349 | CAMK2D        | 0.37  | -2.72 | -1.45 | 6.34E-39 | -3.42E+19 | 3.42E+19 |
| ENSG00000196169 | KIF19         | 8.07  | 8.07  | 3.01  | 5.62E-38 | 3.41E+19  | 3.41E+19 |
| ENSG00000102048 | ASB9          | 0.27  | -3.66 | -1.87 | 1.26E-38 | -3.25E+19 | 3.25E+19 |
| ENSG00000114841 | DNAH1         | 3.66  | 3.66  | 1.87  | 1.57E-38 | 2.92E+19  | 2.92E+19 |
| ENSG00000107833 | NPM3          | 0.35  | -2.86 | -1.51 | 2.40E-38 | -1.84E+19 | 1.84E+19 |
| ENSG00000213433 | RP11-54C4.1   | 9.42  | 9.42  | 3.24  | 2.64E-37 | 1.83E+19  | 1.83E+19 |
| ENSG00000149926 | FAM57B        | 10.25 | 10.25 | 3.36  | 3.20E-37 | 1.81E+19  | 1.81E+19 |
| ENSG00000278588 | HIST1H2BI     | 0.34  | -2.92 | -1.55 | 3.87E-38 | -1.48E+19 | 1.48E+19 |
| ENSG00000117152 | RGS4          | 0.33  | -3.00 | -1.59 | 4.48E-38 | -1.42E+19 | 1.42E+19 |
| ENSG00000108602 | ALDH3A1       | 11.24 | 11.24 | 3.49  | 6.56E-37 | 1.39E+19  | 1.39E+19 |
| ENSG00000134873 | CLDN10        | 0.11  | -9.41 | -3.23 | 5.06E-37 | -1.32E+19 | 1.32E+19 |
| ENSG00000122971 | ACADS         | 0.25  | -4.05 | -2.02 | 9.85E-38 | -1.29E+19 | 1.29E+19 |
| ENSG00000090861 | AARS          | 0.36  | -2.78 | -1.48 | 6.52E-38 | -1.09E+19 | 1.09E+19 |
| ENSG00000276644 | DACH1         | 3.27  | 3.27  | 1.71  | 1.07E-37 | 9.99E+18  | 9.99E+18 |
| ENSG00000117620 | SLC35A3       | 0.35  | -2.88 | -1.53 | 8.64E-38 | -9.81E+18 | 9.81E+18 |
| ENSG00000128567 | PODXL         | 3.17  | 3.17  | 1.67  | 1.49E-37 | 8.23E+18  | 8.23E+18 |
| ENSG00000067836 | ROGDI         | 0.26  | -3.83 | -1.94 | 2.20E-37 | -8.17E+18 | 8.17E+18 |
| ENSG00000173581 | CCDC106       | 0.26  | -3.85 | -1.94 | 3.87E-37 | -6.18E+18 | 6.18E+18 |
| ENSG00000146007 | ZMAT2         | 0.38  | -2.63 | -1.39 | 2.31E-37 | -5.47E+18 | 5.47E+18 |
| ENSG00000163346 | PBXIP1        | 0.38  | -2.65 | -1.40 | 2.54E-37 | -5.25E+18 | 5.25E+18 |
| ENSG00000204839 | C8orf73       | 8.99  | 8.99  | 3.17  | 3.40E-36 | 4.87E+18  | 4.87E+18 |
| ENSG00000171848 | RRM2          | 0.33  | -3.05 | -1.61 | 4.38E-37 | -4.60E+18 | 4.60E+18 |
| ENSG00000185130 | HIST1H2BL     | 0.38  | -2.64 | -1.40 | 3.34E-37 | -4.57E+18 | 4.57E+18 |
| ENSG00000179397 | C1orf101      | 5.07  | 5.07  | 2.34  | 1.26E-36 | 4.52E+18  | 4.52E+18 |
| ENSG00000120832 | MTERFD3       | 0.31  | -3.25 | -1.70 | 5.21E-37 | -4.50E+18 | 4.50E+18 |
| ENSG00000131480 | AOC2          | 8.25  | 8.25  | 3.04  | 3.37E-36 | 4.49E+18  | 4.49E+18 |
| ENSG00000036448 | MYOM2         | 8.96  | 8.96  | 3.16  | 6.19E-36 | 3.60E+18  | 3.60E+18 |
| ENSG00000178538 | CA8           | 0.29  | -3.39 | -1.76 | 1.04E-36 | -3.32E+18 | 3.32E+18 |
| ENSG00000258727 | RP11-66N24.3  | 3.27  | 3.27  | 1.71  | 1.01E-36 | 3.25E+18  | 3.25E+18 |
| ENSG00000183496 | MEX3B         | 2.79  | 2.79  | 1.48  | 7.37E-37 | 3.25E+18  | 3.25E+18 |
| ENSG00000070444 | MNT           | 3.48  | 3.48  | 1.80  | 1.16E-36 | 3.23E+18  | 3.23E+18 |
| ENSG00000205352 | PRR13         | 0.37  | -2.69 | -1.43 | 8.49E-37 | -2.92E+18 | 2.92E+18 |
| ENSG00000260604 | RP1-140K8.5   | 2.56  | 2.56  | 1.36  | 8.25E-37 | 2.82E+18  | 2.82E+18 |
| ENSG00000173818 | ENDOV         | 2.91  | 2.91  | 1.54  | 1.41E-36 | 2.45E+18  | 2.45E+18 |
| ENSG00000141682 | PMAIP1        | 2.64  | 2.64  | 1.40  | 1.31E-36 | 2.31E+18  | 2.31E+18 |
| ENSG00000136383 | ALPK3         | 0.35  | -2.82 | -1.50 | 1.87E-36 | -2.06E+18 | 2.06E+18 |
| ENSG00000107960 | OBFC1         | 2.65  | 2.65  | 1.41  | 2.23E-36 | 1.77E+18  | 1.77E+18 |
| ENSG00000110077 | MS4A6A        | 0.22  | -4.58 | -2.19 | 9.75E-36 | -1.47E+18 | 1.47E+18 |
| ENSG00000102385 | DRP2          | 5.01  | 5.01  | 2.32  | 1.37E-35 | 1.35E+18  | 1.35E+18 |
| ENSG00000169429 | IL8           | 0.37  | -2.69 | -1.43 | 4.74E-36 | -1.24E+18 | 1.24E+18 |
| ENSG00000005238 | FAM214B       | 2.61  | 2.61  | 1.38  | 5.50E-36 | 1.11E+18  | 1.11E+18 |
| ENSG00000137573 | SULF1         | 0.16  | -6.27 | -2.65 | 3.44E-35 | -1.07E+18 | 1.07E+18 |
| ENSG00000143772 | ITPKB         | 2.74  | 2.74  | 1.45  | 9.52E-36 | 8.88E+17  | 8.88E+17 |
| ENSG00000170522 | ELOVL6        | 0.35  | -2.82 | -1.50 | 1.42E-35 | -7.48E+17 | 7.48E+17 |
| ENSG00000203778 | C6orf225      | 0.28  | -3.60 | -1.85 | 2.33E-35 | -7.46E+17 | 7.46E+17 |
| ENSG00000132199 | ENOSF1        | 0.37  | -2.70 | -1.43 | 1.63E-35 | -6.68E+17 | 6.68E+17 |
| ENSG00000138772 | RP11-77I22.3  | 3.21  | 3.21  | 1.68  | 3.22E-35 | 5.65E+17  | 5.65E+17 |
| ENSG00000100784 | ANXA3         | 2.68  | 2.68  | 1.42  | 2.98E-35 | 4.90E+17  | 4.90E+17 |
| ENSG00000100784 | RPS6KA5       | 0.31  | -3.18 | -1.67 | 5.69E-35 | -4.21E+17 | 4.21E+17 |
| ENSG00000050438 | SLC4A8        | 2.59  | 2.59  | 1.37  | 3.90E-35 | 4.15E+17  | 4.15E+17 |
| ENSG00000226149 | RP1-69D17.4   | 4.82  | 4.82  | 2.27  | 1.52E-34 | 3.91E+17  | 3.91E+17 |
| ENSG00000163638 | ADAMTS9       | 0.37  | -2.74 | -1.45 | 6.32E-35 | -3.44E+17 | 3.44E+17 |
| ENSG00000170421 | KRT8          | 2.57  | 2.57  | 1.36  | 7.15E-35 | 3.04E+17  | 3.04E+17 |
| ENSG00000135218 | CD36          | 0.24  | -4.25 | -2.09 | 2.19E-34 | -2.87E+17 | 2.87E+17 |
| ENSG00000198715 | C1orf85       | 0.39  | -2.53 | -1.34 | 8.22E-35 | -2.79E+17 | 2.79E+17 |
| ENSG00000156804 | RP1-180E22.3  | 4.97  | 4.97  | 2.31  | 3.39E-34 | 2.70E+17  | 2.70E+17 |
| ENSG00000156804 | FBXO32        | 3.43  | 3.43  | 1.78  | 2.82E-34 | 2.04E+17  | 2.04E+17 |
| ENSG00000169592 | INO80E        | 0.40  | -2.50 | -1.32 | 1.88E-34 | -1.83E+17 | 1.83E+17 |
| ENSG00000244588 | RAD21L1       | 10.67 | 10.67 | 3.42  | 3.80E-33 | 1.73E+17  | 1.73E+17 |
| ENSG00000091947 | TMEM101       | 0.38  | -2.62 | -1.39 | 3.43E-34 | -1.42E+17 | 1.42E+17 |
| ENSG00000056558 | TRAF1         | 4.24  | 4.24  | 2.08  | 1.41E-33 | 1.13E+17  | 1.13E+17 |
| ENSG00000167740 | CYB5D2        | 2.54  | 2.54  | 1.34  | 5.95E-34 | 1.04E+17  | 1.04E+17 |
| ENSG00000048342 | CC2D2A        | 0.38  | -2.63 | -1.39 | 6.66E-34 | -1.02E+17 | 1.02E+17 |
| ENSG00000156042 | TTC18         | 7.25  | 7.25  | 2.86  | 5.13E-33 | 1.01E+17  | 1.01E+17 |
| ENSG00000137463 | MGARP         | 0.32  | -3.11 | -1.64 | 1.04E-33 | -9.66E+16 | 9.66E+16 |
| ENSG00000112855 | HARS2         | 0.37  | -2.67 | -1.42 | 8.97E-34 | -8.91E+16 | 8.91E+16 |
| ENSG00000197140 | ADAM32        | 3.08  | 3.08  | 1.62  | 1.41E-33 | 8.22E+16  | 8.22E+16 |
| ENSG00000228649 | AC005682.5    | 0.25  | -3.96 | -1.99 | 2.34E-33 | -8.19E+16 | 8.19E+16 |
| ENSG00000196562 | SULF2         | 2.74  | 2.74  | 1.46  | 1.80E-33 | 6.47E+16  | 6.47E+16 |
| ENSG00000230753 | RP4-553F4.6   | 5.73  | 5.73  | 2.52  | 1.27E-32 | 5.08E+16  | 5.08E+16 |
| ENSG00000115221 | ITGB6         | 14.71 | 14.71 | 3.88  | 8.41E-32 | 5.07E+16  | 5.07E+16 |
| ENSG00000007312 | CD79B         | 4.84  | 4.84  | 2.28  | 9.30E-33 | 5.02E+16  | 5.02E+16 |
| ENSG00000151062 | CACNA2D4      | 6.05  | 6.05  | 2.60  | 2.33E-32 | 3.96E+16  | 3.96E+16 |
| ENSG00000038945 | MSR1          | 7.81  | 7.81  | 2.97  | 4.11E-32 | 3.85E+16  | 3.85E+16 |
| ENSG00000134072 | CAMK1         | 0.39  | -2.54 | -1.34 | 4.35E-33 | -3.85E+16 | 3.85E+16 |

|                   |               |      |       |       |          |           |          |
|-------------------|---------------|------|-------|-------|----------|-----------|----------|
| ENSG00000244879   | GABPB1-AS1    | 2.95 | 2.95  | 1.56  | 7.34E-33 | 3.45E+16  | 3.45E+16 |
| ENSG00000172500   | FIBP          | 0.39 | -2.55 | -1.35 | 6.27E-33 | -3.22E+16 | 3.22E+16 |
| ENSG00000148297   | MED22         | 0.39 | -2.57 | -1.36 | 6.72E-33 | -3.13E+16 | 3.13E+16 |
| ENSG00000124641   | MED20         | 0.41 | -2.44 | -1.29 | 6.39E-33 | -3.05E+16 | 3.05E+16 |
| ENSG00000108423   | TUBD1         | 0.29 | -3.46 | -1.79 | 1.43E-32 | -2.89E+16 | 2.89E+16 |
| ENSG00000137033   | IL33          | 0.20 | -4.90 | -2.29 | 6.57E-32 | -1.91E+16 | 1.91E+16 |
| ENSG00000143416   | SELENBP1      | 0.35 | -2.87 | -1.52 | 2.38E-32 | -1.86E+16 | 1.86E+16 |
| ENSG00000197927   | C2orf27A      | 3.31 | 3.31  | 1.73  | 3.37E-32 | 1.80E+16  | 1.80E+16 |
| ENSG00000144476   | CXCR7         | 0.34 | -2.93 | -1.55 | 3.22E-32 | -1.64E+16 | 1.64E+16 |
| ENSG00000226742   | HSBP1L1       | 0.14 | -7.02 | -2.81 | 2.15E-31 | -1.51E+16 | 1.51E+16 |
| ENSG00000127533   | F2RL3         | 6.80 | 6.80  | 2.76  | 2.07E-31 | 1.49E+16  | 1.49E+16 |
| ENSG00000179818   | PCBP1-AS1     | 2.81 | 2.81  | 1.49  | 3.65E-32 | 1.47E+16  | 1.47E+16 |
| ENSG00000115604   | IL18R1        | 0.39 | -2.57 | -1.36 | 3.29E-32 | -1.42E+16 | 1.42E+16 |
| ENSG00000148290   | SURF1         | 0.33 | -3.05 | -1.61 | 6.42E-32 | -1.20E+16 | 1.20E+16 |
| ENSG00000100116   | GCAT          | 0.36 | -2.76 | -1.47 | 5.50E-32 | -1.18E+16 | 1.18E+16 |
| ENSG00000167767   | KRT80         | 2.54 | 2.54  | 1.35  | 4.71E-32 | 1.17E+16  | 1.17E+16 |
| ENSG00000138380   | ALS2CR8       | 3.48 | 3.48  | 1.80  | 9.69E-32 | 1.12E+16  | 1.12E+16 |
| ENSG00000155363   | MOV10         | 0.39 | -2.54 | -1.35 | 5.27E-32 | -1.11E+16 | 1.11E+16 |
| ENSG00000163702   | IL17RC        | 0.34 | -2.91 | -1.54 | 7.27E-32 | -1.08E+16 | 1.08E+16 |
| ENSG00000137727   | ARHGAP20      | 0.32 | -3.16 | -1.66 | 8.72E-32 | -1.07E+16 | 1.07E+16 |
| ENSG00000157404   | KIT           | 3.29 | 3.29  | 1.72  | 1.16E-31 | 9.64E+15  | 9.64E+15 |
| ENSG00000182118   | FAM89A        | 2.95 | 2.95  | 1.56  | 1.43E-31 | 7.78E+15  | 7.78E+15 |
| ENSG00000148288   | GBGT1         | 0.34 | -2.98 | -1.58 | 1.50E-31 | -7.69E+15 | 7.69E+15 |
| ENSG00000168890   | TMEM150A      | 0.32 | -3.11 | -1.64 | 1.70E-31 | -7.54E+15 | 7.54E+15 |
| ENSG00000144583   | MARCH4        | 2.83 | 2.83  | 1.50  | 1.55E-31 | 7.18E+15  | 7.18E+15 |
| ENSG00000164088   | PPM1M         | 0.35 | -2.83 | -1.50 | 1.62E-31 | -7.04E+15 | 7.04E+15 |
| ENSG00000136449   | MYCBPAP       | 5.36 | 5.36  | 2.42  | 6.10E-31 | 6.85E+15  | 6.85E+15 |
| ENSG00000184678   | HIST2H2BE     | 0.38 | -2.61 | -1.38 | 1.72E-31 | -6.30E+15 | 6.30E+15 |
| ENSG00000245025   | RP11-875O11.1 | 5.50 | 5.50  | 2.46  | 8.78E-31 | 5.87E+15  | 5.87E+15 |
| ENSG00000213462   | ERV3-1        | 2.98 | 2.98  | 1.57  | 2.85E-31 | 5.58E+15  | 5.58E+15 |
| ENSG00000140398   | NEIL1         | 0.29 | -3.50 | -1.81 | 4.15E-31 | -5.43E+15 | 5.43E+15 |
| ENSG00000203667   | COX20         | 0.38 | -2.65 | -1.41 | 2.66E-31 | -5.13E+15 | 5.13E+15 |
| ENSG00000224428.2 | RP11-182L21.2 | 2.67 | 2.67  | 1.42  | 2.75E-31 | 5.10E+15  | 5.10E+15 |
| ENSG00000110844   | PRPF40B       | 0.26 | -3.88 | -1.96 | 5.90E-31 | -5.05E+15 | 5.05E+15 |
|                   | AC009236.1    | 9.97 | 9.97  | 3.32  | 3.92E-30 | 5.04E+15  | 5.04E+15 |
| ENSG00000108641   | B9D1          | 0.36 | -2.82 | -1.49 | 3.28E-31 | -4.91E+15 | 4.91E+15 |
| ENSG00000135324   | MRAP2         | 0.36 | -2.79 | -1.48 | 3.41E-31 | -4.77E+15 | 4.77E+15 |
| ENSG00000188921   | PTPLAD2       | 0.28 | -3.54 | -1.82 | 5.62E-31 | -4.72E+15 | 4.72E+15 |
| ENSG00000107537   | PHYH          | 2.53 | 2.53  | 1.34  | 2.90E-31 | 4.69E+15  | 4.69E+15 |
| ENSG00000129667   | RHBDF2        | 3.83 | 3.83  | 1.94  | 7.38E-31 | 4.46E+15  | 4.46E+15 |
| ENSG00000114395   | CYB561D2      | 0.30 | -3.31 | -1.73 | 6.29E-31 | -4.18E+15 | 4.18E+15 |
| ENSG00000162062   | C16orf59      | 0.27 | -3.72 | -1.89 | 9.10E-31 | -3.90E+15 | 3.90E+15 |
| ENSG00000141338   | ABCA8         | 0.18 | -5.63 | -2.49 | 2.12E-30 | -3.87E+15 | 3.87E+15 |
| ENSG00000008130   | NADK          | 0.41 | -2.46 | -1.30 | 5.68E-31 | -3.27E+15 | 3.27E+15 |
| ENSG00000135482   | ZC3H10        | 0.30 | -3.36 | -1.75 | 1.12E-30 | -3.18E+15 | 3.18E+15 |
| ENSG00000128815   | WDFY4         | 2.55 | 2.55  | 1.35  | 7.50E-31 | 2.94E+15  | 2.94E+15 |
| ENSG00000188277   | C15orf62      | 8.82 | 8.82  | 3.14  | 9.03E-30 | 2.93E+15  | 2.93E+15 |
| ENSG00000142002   | DPP9          | 2.71 | 2.71  | 1.44  | 9.37E-31 | 2.80E+15  | 2.80E+15 |
| ENSG00000225339   | RP11-513I15.6 | 4.95 | 4.95  | 2.31  | 4.01E-30 | 2.47E+15  | 2.47E+15 |
| ENSG00000136840   | ST6GALNAC4    | 0.42 | -2.36 | -1.24 | 9.35E-31 | -2.44E+15 | 2.44E+15 |
| ENSG00000197696   | NMB           | 0.28 | -3.55 | -1.83 | 2.32E-30 | -2.33E+15 | 2.33E+15 |
| ENSG00000136982   | DSCC1         | 0.35 | -2.82 | -1.50 | 1.57E-30 | -2.25E+15 | 2.25E+15 |
| ENSG00000077585   | GPR137B       | 2.75 | 2.75  | 1.46  | 1.54E-30 | 2.22E+15  | 2.22E+15 |
| ENSG00000261597   | RP11-353B9.1  | 6.29 | 6.29  | 2.65  | 9.65E-30 | 2.02E+15  | 2.02E+15 |
| ENSG00000170801   | HTRA3         | 2.83 | 2.83  | 1.50  | 2.08E-30 | 1.96E+15  | 1.96E+15 |
| ENSG00000198270   | TMEM116       | 4.18 | 4.18  | 2.06  | 4.57E-30 | 1.95E+15  | 1.95E+15 |
| ENSG00000163879   | DNALI1        | 0.22 | -4.64 | -2.21 | 5.80E-30 | -1.93E+15 | 1.93E+15 |
|                   | RP5-1014C4.3  | 6.41 | 6.41  | 2.68  | 1.11E-29 | 1.92E+15  | 1.92E+15 |
| ENSG00000111266   | DUSP16        | 2.45 | 2.45  | 1.29  | 1.64E-30 | 1.92E+15  | 1.92E+15 |
| ENSG00000203791   | METTL10       | 0.31 | -3.23 | -1.69 | 3.13E-30 | -1.83E+15 | 1.83E+15 |
| ENSG00000162779   | AXDND1        | 5.25 | 5.25  | 2.39  | 8.51E-30 | 1.80E+15  | 1.80E+15 |
| ENSG00000196468   | FGF16         | 2.84 | 2.84  | 1.51  | 2.81E-30 | 1.70E+15  | 1.70E+15 |
| ENSG00000230487   | PSMG3-AS1     | 3.63 | 3.63  | 1.86  | 5.05E-30 | 1.62E+15  | 1.62E+15 |
| ENSG00000143224   | PPOX          | 0.34 | -2.91 | -1.54 | 3.40E-30 | -1.58E+15 | 1.58E+15 |
| ENSG00000102879   | CORO1A        | 0.15 | -6.89 | -2.78 | 1.99E-29 | -1.55E+15 | 1.55E+15 |
| ENSG00000104524   | PYCRL         | 0.35 | -2.84 | -1.51 | 3.89E-30 | -1.44E+15 | 1.44E+15 |
| ENSG00000107175   | CREB3         | 0.42 | -2.36 | -1.24 | 3.25E-30 | -1.31E+15 | 1.31E+15 |
| ENSG00000162066   | AMDHD2        | 0.37 | -2.74 | -1.45 | 5.00E-30 | -1.22E+15 | 1.22E+15 |
| ENSG00000108528   | SLC25A11      | 0.43 | -2.35 | -1.23 | 3.89E-30 | -1.19E+15 | 1.19E+15 |
| ENSG00000130513   | GDF15         | 2.82 | 2.82  | 1.50  | 5.76E-30 | 1.18E+15  | 1.18E+15 |
| ENSG00000242259   | C22orf39      | 0.39 | -2.58 | -1.37 | 4.97E-30 | -1.16E+15 | 1.16E+15 |
| ENSG00000136630   | HLX           | 3.03 | 3.03  | 1.60  | 8.33E-30 | 1.05E+15  | 1.05E+15 |
| ENSG00000276410   | HIST1H2BB     | 0.38 | -2.64 | -1.40 | 6.98E-30 | -9.99E+14 | 9.99E+14 |
| ENSG00000197153   | HIST1H3J      | 0.40 | -2.48 | -1.31 | 6.26E-30 | -9.93E+14 | 9.93E+14 |
| ENSG00000197837   | HIST4H4       | 0.35 | -2.83 | -1.50 | 1.03E-29 | -8.83E+14 | 8.83E+14 |
| ENSG00000236824   | BCYRN1        | 0.32 | -3.10 | -1.63 | 1.85E-29 | -7.21E+14 | 7.21E+14 |
| ENSG00000091972   | CD200         | 0.28 | -3.52 | -1.82 | 2.54E-29 | -6.98E+14 | 6.98E+14 |
| ENSG00000250565   | ATP6V1E2      | 3.08 | 3.08  | 1.62  | 2.10E-29 | 6.72E+14  | 6.72E+14 |
| ENSG00000124721   | DNAH8         | 3.87 | 3.87  | 1.95  | 4.05E-29 | 6.09E+14  | 6.09E+14 |

|                 |               |      |       |       |          |           |          |
|-----------------|---------------|------|-------|-------|----------|-----------|----------|
| ENSG00000149823 | VPS51         | 0.41 | -2.44 | -1.29 | 2.25E-29 | -5.15E+14 | 5.15E+14 |
| ENSG00000197989 | SNHG12        | 0.31 | -3.25 | -1.70 | 5.65E-29 | -4.33E+14 | 4.33E+14 |
| ENSG00000149781 | FERMT3        | 0.39 | -2.56 | -1.36 | 4.78E-29 | -3.70E+14 | 3.70E+14 |
| ENSG00000235217 | TSPY26P       | 0.26 | -3.83 | -1.94 | 1.11E-28 | -3.63E+14 | 3.63E+14 |
| ENSG00000139880 | CDH24         | 0.30 | -3.29 | -1.72 | 8.27E-29 | -3.62E+14 | 3.62E+14 |
| ENSG00000155465 | SLC7A7        | 2.45 | 2.45  | 1.29  | 4.66E-29 | 3.59E+14  | 3.59E+14 |
| ENSG00000091879 | ANGPT2        | 3.01 | 3.01  | 1.59  | 7.11E-29 | 3.56E+14  | 3.56E+14 |
| ENSG00000184785 | CXorf69       | 0.27 | -3.74 | -1.90 | 1.11E-28 | -3.55E+14 | 3.55E+14 |
| ENSG00000162733 | DDR2          | 0.41 | -2.41 | -1.27 | 4.81E-29 | -3.48E+14 | 3.48E+14 |
| ENSG00000139625 | MAP3K12       | 0.40 | -2.47 | -1.31 | 5.40E-29 | -3.37E+14 | 3.37E+14 |
| ENSG00000160325 | CACFD1        | 2.66 | 2.66  | 1.41  | 6.61E-29 | 3.27E+14  | 3.27E+14 |
| ENSG00000214021 | TTLL3         | 2.62 | 2.62  | 1.39  | 6.79E-29 | 3.18E+14  | 3.18E+14 |
| ENSG00000236671 | RP11-573111.2 | 5.62 | 5.62  | 2.49  | 3.33E-28 | 3.08E+14  | 3.08E+14 |
| ENSG00000172738 | TMEM217       | 3.07 | 3.07  | 1.62  | 1.18E-28 | 2.83E+14  | 2.83E+14 |
| ENSG00000232453 | RP4-794H19.1  | 5.61 | 5.61  | 2.49  | 3.97E-28 | 2.81E+14  | 2.81E+14 |
| ENSG00000103202 | NME4          | 0.43 | -2.35 | -1.23 | 9.19E-29 | -2.45E+14 | 2.45E+14 |
| ENSG00000143799 | PARP1         | 0.41 | -2.43 | -1.28 | 1.02E-28 | -2.40E+14 | 2.40E+14 |
| ENSG00000197555 | SIPA1L1       | 2.51 | 2.51  | 1.33  | 1.31E-28 | 2.19E+14  | 2.19E+14 |
| ENSG00000171346 | KRT15         | 3.35 | 3.35  | 1.74  | 2.43E-28 | 2.15E+14  | 2.15E+14 |
| ENSG00000027847 | B4GALT7       | 0.40 | -2.48 | -1.31 | 1.35E-28 | -2.14E+14 | 2.14E+14 |
| ENSG00000118473 | SGIP1         | 2.39 | 2.39  | 1.26  | 1.54E-28 | 1.93E+14  | 1.93E+14 |
| ENSG00000213672 | NCKIPSD       | 0.24 | -4.23 | -2.08 | 5.03E-28 | -1.89E+14 | 1.89E+14 |
| ENSG00000172927 | MYEOV         | 3.68 | 3.68  | 1.88  | 4.33E-28 | 1.77E+14  | 1.77E+14 |
| ENSG00000125458 | NT5C          | 0.40 | -2.50 | -1.32 | 2.10E-28 | -1.72E+14 | 1.72E+14 |
| ENSG00000185522 | C11orf35      | 5.81 | 5.81  | 2.54  | 1.28E-27 | 1.62E+14  | 1.62E+14 |
| ENSG00000135469 | COQ10A        | 0.31 | -3.24 | -1.70 | 4.24E-28 | -1.57E+14 | 1.57E+14 |
| ENSG00000235888 | AF064858.8    | 6.13 | 6.13  | 2.62  | 1.66E-27 | 1.50E+14  | 1.50E+14 |
| ENSG00000160781 | PAQR6         | 5.67 | 5.67  | 2.50  | 1.54E-27 | 1.45E+14  | 1.45E+14 |
| ENSG00000114554 | PLXNA1        | 2.51 | 2.51  | 1.33  | 3.07E-28 | 1.43E+14  | 1.43E+14 |
| ENSG00000076003 | MCM6          | 0.43 | -2.34 | -1.23 | 2.86E-28 | -1.38E+14 | 1.38E+14 |
| ENSG00000244187 | TMEM141       | 0.41 | -2.42 | -1.27 | 3.40E-28 | -1.31E+14 | 1.31E+14 |
| ENSG00000169499 | PLEKHA2       | 0.34 | -2.98 | -1.57 | 7.23E-28 | -1.11E+14 | 1.11E+14 |
| ENSG00000167969 | ECI1          | 0.37 | -2.73 | -1.45 | 6.34E-28 | -1.08E+14 | 1.08E+14 |
| ENSG00000008382 | MPND          | 0.21 | -4.80 | -2.26 | 2.26E-27 | -1.01E+14 | 1.01E+14 |
| ENSG00000135074 | ADAM19        | 2.30 | 2.30  | 1.20  | 5.34E-28 | 9.97E+13  | 9.97E+13 |
| ENSG00000196329 | GIMAP5        | 0.34 | -2.96 | -1.56 | 9.29E-28 | -9.70E+13 | 9.70E+13 |
| ENSG00000099203 | TMED1         | 0.42 | -2.41 | -1.27 | 7.16E-28 | -8.99E+13 | 8.99E+13 |
| ENSG00000185928 | PAGR1         | 0.40 | -2.49 | -1.32 | 7.97E-28 | -8.82E+13 | 8.82E+13 |
| ENSG00000221866 | PLXNA4        | 0.35 | -2.88 | -1.53 | 1.16E-27 | -8.43E+13 | 8.43E+13 |
| ENSG00000166337 | TAF10         | 0.44 | -2.29 | -1.20 | 8.49E-28 | -7.86E+13 | 7.86E+13 |
| ENSG00000138696 | BMPR1B        | 0.29 | -3.44 | -1.78 | 2.06E-27 | -7.57E+13 | 7.57E+13 |
| ENSG00000023902 | PLEKHO1       | 2.47 | 2.47  | 1.30  | 1.23E-27 | 7.02E+13  | 7.02E+13 |
| ENSG00000115290 | GRB14         | 0.40 | -2.50 | -1.32 | 2.00E-27 | -5.58E+13 | 5.58E+13 |
| ENSG00000158234 | FAIM          | 0.38 | -2.61 | -1.38 | 2.26E-27 | -5.49E+13 | 5.49E+13 |
| ENSG00000130724 | CHMP2A        | 0.44 | -2.25 | -1.17 | 1.81E-27 | -5.30E+13 | 5.30E+13 |
| ENSG00000163629 | PTPN13        | 0.34 | -2.91 | -1.54 | 3.57E-27 | -4.86E+13 | 4.86E+13 |
| ENSG00000165283 | STOML2        | 0.42 | -2.35 | -1.23 | 2.48E-27 | -4.72E+13 | 4.72E+13 |
| ENSG00000063438 | AHRR          | 2.53 | 2.53  | 1.34  | 3.37E-27 | 4.36E+13  | 4.36E+13 |
| ENSG00000184867 | ARMCX2        | 0.43 | -2.34 | -1.23 | 2.97E-27 | -4.29E+13 | 4.29E+13 |
| ENSG00000234155 | RP11-30P6.6   | 5.22 | 5.22  | 2.39  | 1.76E-26 | 3.94E+13  | 3.94E+13 |
| ENSG00000214279 | RP11-108K14.4 | 4.42 | 4.42  | 2.14  | 1.30E-26 | 3.87E+13  | 3.87E+13 |
| ENSG00000106336 | FBXO24        | 7.25 | 7.25  | 2.86  | 3.82E-26 | 3.71E+13  | 3.71E+13 |
| ENSG00000114316 | USP4          | 0.37 | -2.70 | -1.43 | 5.80E-27 | -3.54E+13 | 3.54E+13 |
| ENSG00000143545 | RAB13         | 0.39 | -2.59 | -1.38 | 5.57E-27 | -3.48E+13 | 3.48E+13 |
| ENSG00000198892 | SHISA4        | 0.35 | -2.88 | -1.53 | 6.94E-27 | -3.46E+13 | 3.46E+13 |
| ENSG00000111052 | LIN7A         | 0.28 | -3.56 | -1.83 | 1.12E-26 | -3.37E+13 | 3.37E+13 |
| ENSG00000047617 | ANO2          | 2.29 | 2.29  | 1.19  | 4.92E-27 | 3.26E+13  | 3.26E+13 |
| ENSG00000258947 | TUBB3         | 2.31 | 2.31  | 1.21  | 5.03E-27 | 3.25E+13  | 3.25E+13 |
| ENSG00000132359 | RAP1GAP2      | 3.36 | 3.36  | 1.75  | 1.38E-26 | 2.86E+13  | 2.86E+13 |
| ENSG00000167536 | DHRS13        | 0.31 | -3.21 | -1.68 | 1.60E-26 | -2.53E+13 | 2.53E+13 |
| ENSG00000100372 | SLC25A17      | 0.43 | -2.35 | -1.23 | 8.86E-27 | -2.49E+13 | 2.49E+13 |
| ENSG00000140990 | NDUFB10       | 0.45 | -2.24 | -1.17 | 9.08E-27 | -2.35E+13 | 2.35E+13 |
| ENSG00000183638 | RP1L1         | 5.01 | 5.01  | 2.32  | 4.93E-26 | 2.26E+13  | 2.26E+13 |
| ENSG00000099953 | MMP11         | 2.66 | 2.66  | 1.41  | 1.69E-26 | 2.05E+13  | 2.05E+13 |
| ENSG00000111674 | ENO2          | 0.32 | -3.14 | -1.65 | 2.51E-26 | -1.98E+13 | 1.98E+13 |
| ENSG00000240990 | HOXA11-AS     | 2.63 | 2.63  | 1.39  | 3.01E-26 | 1.51E+13  | 1.51E+13 |
| ENSG00000185267 | CDNF          | 6.23 | 6.23  | 2.64  | 1.80E-25 | 1.47E+13  | 1.47E+13 |
| ENSG00000163071 | SPATA18       | 2.28 | 2.28  | 1.19  | 2.52E-26 | 1.44E+13  | 1.44E+13 |
| ENSG00000260337 | RP11-386M24.6 | 5.63 | 5.63  | 2.49  | 1.58E-25 | 1.42E+13  | 1.42E+13 |
| ENSG00000168237 | GLYCTK        | 0.39 | -2.56 | -1.35 | 3.79E-26 | -1.31E+13 | 1.31E+13 |
| ENSG00000166803 | KIAA0101      | 0.44 | -2.29 | -1.20 | 3.20E-26 | -1.28E+13 | 1.28E+13 |
| ENSG00000137872 | SEMA6D        | 0.38 | -2.64 | -1.40 | 5.01E-26 | -1.18E+13 | 1.18E+13 |
| ENSG00000157227 | MMP14         | 2.38 | 2.38  | 1.25  | 4.38E-26 | 1.14E+13  | 1.14E+13 |
| ENSG00000186567 | CEACAM19      | 3.29 | 3.29  | 1.72  | 8.74E-26 | 1.11E+13  | 1.11E+13 |
| ENSG00000185022 | MAFF          | 2.39 | 2.39  | 1.26  | 5.94E-26 | 9.81E+12  | 9.81E+12 |
| ENSG00000106852 | LHX6          | 2.37 | 2.37  | 1.25  | 6.02E-26 | 9.67E+12  | 9.67E+12 |
| ENSG00000277972 | CISD3         | 0.40 | -2.51 | -1.33 | 6.77E-26 | -9.64E+12 | 9.64E+12 |
| ENSG00000172031 | EPHX4         | 2.38 | 2.38  | 1.25  | 6.17E-26 | 9.59E+12  | 9.59E+12 |
| ENSG00000237870 | AC073130.1    | 2.80 | 2.80  | 1.49  | 8.77E-26 | 9.46E+12  | 9.46E+12 |

|                 |              |      |       |       |          |           |          |
|-----------------|--------------|------|-------|-------|----------|-----------|----------|
| ENSG00000112297 | AIM1         | 2.33 | 2.33  | 1.22  | 7.03E-26 | 8.78E+12  | 8.78E+12 |
| ENSG00000225377 | RP5-1103G7.4 | 3.33 | 3.33  | 1.74  | 1.47E-25 | 8.68E+12  | 8.68E+12 |
| ENSG00000131153 | GINS2        | 0.46 | -2.18 | -1.13 | 7.16E-26 | -8.15E+12 | 8.15E+12 |
| ENSG00000166510 | CCDC68       | 0.35 | -2.86 | -1.51 | 1.24E-25 | -8.12E+12 | 8.12E+12 |
| ENSG00000232533 | AC093673.5   | 2.36 | 2.36  | 1.24  | 8.76E-26 | 7.98E+12  | 7.98E+12 |
| ENSG00000169026 | MFS07        | 0.17 | -5.80 | -2.54 | 5.93E-25 | -7.53E+12 | 7.53E+12 |
| ENSG00000109771 | LRP2BP       | 3.37 | 3.37  | 1.75  | 2.15E-25 | 7.26E+12  | 7.26E+12 |
| ENSG00000260083 | MIR4519      | 3.83 | 3.83  | 1.94  | 3.06E-25 | 6.91E+12  | 6.91E+12 |
| ENSG00000130758 | MAP3K10      | 2.54 | 2.54  | 1.35  | 1.59E-25 | 6.37E+12  | 6.37E+12 |
| ENSG00000094804 | CDC6         | 0.45 | -2.23 | -1.16 | 1.36E-25 | -6.06E+12 | 6.06E+12 |
| ENSG00000145911 | N4BP3        | 2.29 | 2.29  | 1.19  | 1.48E-25 | 5.95E+12  | 5.95E+12 |
| ENSG00000103507 | BCKDK        | 0.41 | -2.47 | -1.30 | 1.84E-25 | -5.75E+12 | 5.75E+12 |
| ENSG00000156398 | SFXN2        | 0.40 | -2.47 | -1.31 | 1.93E-25 | -5.62E+12 | 5.62E+12 |
| ENSG00000198336 | MYL4         | 5.78 | 5.78  | 2.53  | 1.13E-24 | 5.43E+12  | 5.43E+12 |
| ENSG00000114383 | TUSC2        | 0.46 | -2.20 | -1.14 | 1.95E-25 | -4.97E+12 | 4.97E+12 |
| ENSG00000241170 | RP11-147I3.1 | 6.20 | 6.20  | 2.63  | 2.05E-24 | 4.33E+12  | 4.33E+12 |
| ENSG00000173267 | SNCG         | 2.25 | 2.25  | 1.17  | 3.17E-25 | 3.99E+12  | 3.99E+12 |
| ENSG00000173442 | EHBP1L1      | 0.42 | -2.37 | -1.24 | 3.55E-25 | -3.98E+12 | 3.98E+12 |
| ENSG00000100938 | GMPR2        | 0.45 | -2.21 | -1.14 | 3.11E-25 | -3.95E+12 | 3.95E+12 |
| ENSG00000100918 | REC8         | 0.29 | -3.40 | -1.77 | 7.67E-25 | -3.89E+12 | 3.89E+12 |
| ENSG00000205038 | PKHD1L1      | 0.17 | -5.74 | -2.52 | 2.80E-24 | -3.43E+12 | 3.43E+12 |
| ENSG00000075399 | VPS9D1       | 2.52 | 2.52  | 1.34  | 5.61E-25 | 3.37E+12  | 3.37E+12 |
| ENSG00000146859 | TMEM140      | 0.34 | -2.94 | -1.56 | 8.32E-25 | -3.22E+12 | 3.22E+12 |
| ENSG00000100592 | DAAM1        | 2.17 | 2.17  | 1.12  | 4.54E-25 | 3.22E+12  | 3.22E+12 |
| ENSG00000169282 | KCNAB1       | 0.37 | -2.70 | -1.43 | 7.76E-25 | -3.06E+12 | 3.06E+12 |
| ENSG00000161981 | SNRNP25      | 0.44 | -2.26 | -1.18 | 5.67E-25 | -3.00E+12 | 3.00E+12 |
| ENSG00000146021 | KLHL3        | 0.44 | -2.27 | -1.18 | 5.81E-25 | -2.97E+12 | 2.97E+12 |
| ENSG00000205502 | C2CD4B       | 2.78 | 2.78  | 1.47  | 8.77E-25 | 2.97E+12  | 2.97E+12 |
| ENSG00000260023 | RP11-49C24.1 | 4.28 | 4.28  | 2.10  | 2.11E-24 | 2.94E+12  | 2.94E+12 |
| ENSG00000102096 | PIM2         | 0.31 | -3.22 | -1.69 | 1.22E-24 | -2.92E+12 | 2.92E+12 |
| ENSG00000166478 | ZNF143       | 2.31 | 2.31  | 1.21  | 6.54E-25 | 2.86E+12  | 2.86E+12 |
| ENSG00000111254 | AKAP3        | 7.20 | 7.20  | 2.85  | 7.08E-24 | 2.70E+12  | 2.70E+12 |
| ENSG00000141298 | SSH2         | 2.26 | 2.26  | 1.18  | 7.61E-25 | 2.59E+12  | 2.59E+12 |
| ENSG00000170271 | C5orf4       | 0.36 | -2.79 | -1.48 | 1.32E-24 | -2.42E+12 | 2.42E+12 |
| ENSG00000108786 | HSD17B1      | 4.57 | 4.57  | 2.19  | 3.60E-24 | 2.41E+12  | 2.41E+12 |
| ENSG00000171202 | TMEM126A     | 0.42 | -2.37 | -1.25 | 1.01E-24 | -2.35E+12 | 2.35E+12 |
| ENSG00000111341 | MGP          | 0.42 | -2.36 | -1.24 | 1.09E-24 | -2.26E+12 | 2.26E+12 |
| ENSG00000006756 | ARSD         | 2.41 | 2.41  | 1.27  | 1.18E-24 | 2.22E+12  | 2.22E+12 |
| ENSG00000172530 | BANP         | 2.50 | 2.50  | 1.32  | 1.42E-24 | 2.10E+12  | 2.10E+12 |
| ENSG00000135318 | NT5E         | 2.33 | 2.33  | 1.22  | 1.40E-24 | 1.96E+12  | 1.96E+12 |
| ENSG00000149582 | TMEM25       | 0.36 | -2.77 | -1.47 | 2.04E-24 | -1.94E+12 | 1.94E+12 |
| ENSG00000174276 | ZNHIT2       | 0.30 | -3.28 | -1.71 | 3.03E-24 | -1.88E+12 | 1.88E+12 |
| ENSG00000196704 | AMZ2         | 2.21 | 2.21  | 1.15  | 1.55E-24 | 1.78E+12  | 1.78E+12 |
| ENSG00000214756 | METTL12      | 0.30 | -3.37 | -1.75 | 3.62E-24 | -1.77E+12 | 1.77E+12 |
| ENSG00000253669 | KB-1732A1.1  | 4.00 | 4.00  | 2.00  | 5.35E-24 | 1.73E+12  | 1.73E+12 |
| ENSG00000116771 | AGMAT        | 0.19 | -5.14 | -2.36 | 8.99E-24 | -1.71E+12 | 1.71E+12 |
| ENSG00000129038 | LOXL1        | 3.20 | 3.20  | 1.68  | 3.54E-24 | 1.70E+12  | 1.70E+12 |
| ENSG00000133466 | C1QTNF6      | 2.36 | 2.36  | 1.24  | 2.14E-24 | 1.61E+12  | 1.61E+12 |
| ENSG00000277775 | HIST1H3F     | 0.42 | -2.36 | -1.24 | 2.18E-24 | -1.60E+12 | 1.60E+12 |
| ENSG00000166997 | CNPY4        | 0.46 | -2.17 | -1.12 | 2.01E-24 | -1.53E+12 | 1.53E+12 |
| ENSG00000170011 | MYRIP        | 0.45 | -2.25 | -1.17 | 2.37E-24 | -1.46E+12 | 1.46E+12 |
| ENSG00000171621 | SPSB1        | 2.13 | 2.13  | 1.09  | 2.22E-24 | 1.43E+12  | 1.43E+12 |
| ENSG00000169750 | RAC3         | 0.46 | -2.19 | -1.13 | 2.63E-24 | -1.35E+12 | 1.35E+12 |
| ENSG00000107719 | PALD1        | 2.32 | 2.32  | 1.22  | 2.99E-24 | 1.34E+12  | 1.34E+12 |
| ENSG00000250091 | DNAH10OS     | 6.01 | 6.01  | 2.59  | 2.24E-23 | 1.27E+12  | 1.27E+12 |
| ENSG00000168569 | TMEM223      | 0.39 | -2.58 | -1.37 | 4.25E-24 | -1.25E+12 | 1.25E+12 |
| ENSG00000277734 | TRAC         | 5.89 | 5.89  | 2.56  | 2.28E-23 | 1.23E+12  | 1.23E+12 |
| ENSG00000267317 | CTB-25B13.12 | 4.48 | 4.48  | 2.16  | 1.37E-23 | 1.21E+12  | 1.21E+12 |
| ENSG00000143554 | SLC27A3      | 0.39 | -2.54 | -1.34 | 4.63E-24 | -1.18E+12 | 1.18E+12 |
| ENSG00000234883 | MIR155HG     | 0.31 | -3.20 | -1.68 | 7.85E-24 | -1.14E+12 | 1.14E+12 |
| ENSG00000187024 | PTRH1        | 0.39 | -2.53 | -1.34 | 5.05E-24 | -1.13E+12 | 1.13E+12 |
| ENSG00000131374 | TBC1D5       | 2.24 | 2.24  | 1.16  | 3.97E-24 | 1.12E+12  | 1.12E+12 |
| ENSG00000205403 | CFI          | 0.44 | -2.28 | -1.19 | 4.40E-24 | -1.09E+12 | 1.09E+12 |
| ENSG00000196139 | AKR1C3       | 0.41 | -2.44 | -1.28 | 5.19E-24 | -1.07E+12 | 1.07E+12 |
| ENSG00000136877 | FPGS         | 0.46 | -2.19 | -1.13 | 4.44E-24 | -1.04E+12 | 1.04E+12 |
| ENSG00000065621 | GSTO2        | 5.57 | 5.57  | 2.48  | 2.89E-23 | 1.04E+12  | 1.04E+12 |
| ENSG00000197375 | SLC22A5      | 2.52 | 2.52  | 1.33  | 5.93E-24 | 1.04E+12  | 1.04E+12 |
| ENSG00000152926 | ZNF117       | 3.31 | 3.31  | 1.73  | 1.05E-23 | 1.02E+12  | 1.02E+12 |
| ENSG00000167705 | RILP         | 0.33 | -2.99 | -1.58 | 8.68E-24 | -1.02E+12 | 1.02E+12 |
| ENSG00000230266 | XXYL1-AS2    | 2.36 | 2.36  | 1.24  | 6.22E-24 | 9.48E+11  | 9.48E+11 |
| ENSG00000069702 | TGFBR3       | 0.44 | -2.27 | -1.19 | 6.25E-24 | -9.10E+11 | 9.10E+11 |
| ENSG00000072609 | CHFR         | 0.46 | -2.19 | -1.13 | 5.92E-24 | -9.00E+11 | 9.00E+11 |
| ENSG00000178695 | KCTD12       | 0.44 | -2.26 | -1.18 | 6.39E-24 | -8.94E+11 | 8.94E+11 |
| ENSG00000116106 | EPA4         | 2.20 | 2.20  | 1.14  | 6.10E-24 | 8.91E+11  | 8.91E+11 |
| ENSG00000177483 | RBM44        | 3.62 | 3.62  | 1.86  | 1.84E-23 | 8.43E+11  | 8.43E+11 |
| ENSG00000003400 | CASP10       | 0.47 | -2.13 | -1.09 | 6.59E-24 | -8.28E+11 | 8.28E+11 |
| ENSG00000126878 | AIF1L        | 0.36 | -2.78 | -1.47 | 1.18E-23 | -8.08E+11 | 8.08E+11 |
| ENSG00000274750 | HIST1H3E     | 0.41 | -2.42 | -1.28 | 9.94E-24 | -7.69E+11 | 7.69E+11 |
| ENSG00000109458 | GAB1         | 2.14 | 2.14  | 1.09  | 8.61E-24 | 7.28E+11  | 7.28E+11 |

|                 |               |      |       |       |          |           |          |
|-----------------|---------------|------|-------|-------|----------|-----------|----------|
| ENSG00000215845 | TSTD1         | 0.33 | -3.03 | -1.60 | 1.80E-23 | -7.14E+11 | 7.14E+11 |
| ENSG00000137877 | SPTBN5        | 2.29 | 2.29  | 1.19  | 1.08E-23 | 6.97E+11  | 6.97E+11 |
| ENSG00000160179 | ABCG1         | 2.12 | 2.12  | 1.08  | 9.33E-24 | 6.94E+11  | 6.94E+11 |
| ENSG00000177663 | IL17RA        | 2.11 | 2.11  | 1.08  | 1.03E-23 | 6.57E+11  | 6.57E+11 |
| ENSG00000135951 | TSGA10        | 4.94 | 4.94  | 2.31  | 5.83E-23 | 6.47E+11  | 6.47E+11 |
| ENSG00000156253 | RWDD2B        | 0.45 | -2.24 | -1.17 | 1.22E-23 | -6.42E+11 | 6.42E+11 |
| ENSG00000174365 | SNHG11        | 2.57 | 2.57  | 1.36  | 1.76E-23 | 6.14E+11  | 6.14E+11 |
| ENSG00000148291 | SURF2         | 0.35 | -2.89 | -1.53 | 2.24E-23 | -6.11E+11 | 6.11E+11 |
| ENSG00000185813 | PCYT2         | 0.46 | -2.17 | -1.12 | 1.49E-23 | -5.63E+11 | 5.63E+11 |
| ENSG00000186174 | BCL9L         | 2.61 | 2.61  | 1.38  | 2.33E-23 | 5.41E+11  | 5.41E+11 |
| ENSG00000156453 | PCDH1         | 2.40 | 2.40  | 1.26  | 2.00E-23 | 5.37E+11  | 5.37E+11 |
| ENSG00000100350 | FOXRED2       | 0.36 | -2.81 | -1.49 | 2.79E-23 | -5.31E+11 | 5.31E+11 |
| ENSG00000185507 | IRF7          | 0.28 | -3.53 | -1.82 | 5.08E-23 | -4.96E+11 | 4.96E+11 |
| ENSG00000105655 | ISYNA1        | 0.33 | -3.01 | -1.59 | 3.68E-23 | -4.95E+11 | 4.95E+11 |
| ENSG00000109501 | WFS1          | 2.60 | 2.60  | 1.38  | 2.85E-23 | 4.88E+11  | 4.88E+11 |
| ENSG00000175745 | NR2F1         | 0.40 | -2.51 | -1.33 | 3.04E-23 | -4.55E+11 | 4.55E+11 |
| ENSG00000160753 | RUSC1         | 0.45 | -2.23 | -1.16 | 3.09E-23 | -4.01E+11 | 4.01E+11 |
| ENSG00000163590 | PPM1L         | 2.71 | 2.71  | 1.44  | 4.66E-23 | 3.97E+11  | 3.97E+11 |
| ENSG00000007384 | RHBDP1        | 2.26 | 2.26  | 1.17  | 3.41E-23 | 3.87E+11  | 3.87E+11 |
| ENSG00000235750 | KIAA0040      | 2.25 | 2.25  | 1.17  | 3.51E-23 | 3.79E+11  | 3.79E+11 |
| ENSG00000078487 | ZCWFW1        | 4.15 | 4.15  | 2.05  | 1.39E-22 | 3.52E+11  | 3.52E+11 |
| ENSG00000179532 | DNHD1         | 3.88 | 3.88  | 1.96  | 1.26E-22 | 3.45E+11  | 3.45E+11 |
| ENSG00000117877 | CD3EAP        | 0.46 | -2.16 | -1.11 | 4.40E-23 | -3.25E+11 | 3.25E+11 |
| ENSG00000130303 | BST2          | 0.44 | -2.27 | -1.18 | 4.93E-23 | -3.23E+11 | 3.23E+11 |
| ENSG00000106804 | C5            | 2.62 | 2.62  | 1.39  | 6.61E-23 | 3.22E+11  | 3.22E+11 |
| ENSG00000126803 | HSPA2         | 0.35 | -2.82 | -1.50 | 7.69E-23 | -3.22E+11 | 3.22E+11 |
| ENSG00000175274 | TP53I11       | 2.10 | 2.10  | 1.07  | 4.29E-23 | 3.20E+11  | 3.20E+11 |
| ENSG00000161912 | ADCY10P1      | 3.97 | 3.97  | 1.99  | 1.54E-22 | 3.20E+11  | 3.20E+11 |
| ENSG00000274618 | HIST1H4F      | 0.43 | -2.34 | -1.23 | 5.83E-23 | -3.06E+11 | 3.06E+11 |
| ENSG00000092330 | TINF2         | 0.48 | -2.10 | -1.07 | 4.80E-23 | -3.03E+11 | 3.03E+11 |
| ENSG00000147642 | SYBU          | 0.21 | -4.71 | -2.24 | 2.64E-22 | -2.90E+11 | 2.90E+11 |
| ENSG00000132763 | MMACHC        | 0.35 | -2.84 | -1.51 | 9.60E-23 | -2.90E+11 | 2.90E+11 |
| ENSG00000213888 | AC005003.1    | 3.57 | 3.57  | 1.84  | 1.70E-22 | 2.74E+11  | 2.74E+11 |
| ENSG00000121005 | CRISPLD1      | 0.43 | -2.33 | -1.22 | 7.52E-23 | -2.68E+11 | 2.68E+11 |
| ENSG00000144645 | OSBPL10       | 2.32 | 2.32  | 1.21  | 8.26E-23 | 2.55E+11  | 2.55E+11 |
| ENSG00000163689 | C3orf67       | 2.32 | 2.32  | 1.22  | 8.74E-23 | 2.48E+11  | 2.48E+11 |
| ENSG00000168961 | LGALS9        | 0.36 | -2.82 | -1.49 | 1.29E-22 | -2.47E+11 | 2.47E+11 |
| ENSG00000085063 | CD59          | 0.46 | -2.19 | -1.13 | 8.35E-23 | -2.40E+11 | 2.40E+11 |
| ENSG00000173334 | TRIB1         | 2.23 | 2.23  | 1.16  | 8.87E-23 | 2.37E+11  | 2.37E+11 |
| ENSG00000029534 | ANK1          | 3.87 | 3.87  | 1.95  | 3.12E-22 | 2.19E+11  | 2.19E+11 |
|                 | RP11-521C20.4 | 4.13 | 4.13  | 2.04  | 3.70E-22 | 2.14E+11  | 2.14E+11 |
| ENSG00000239521 | GATS          | 2.80 | 2.80  | 1.48  | 1.97E-22 | 1.99E+11  | 1.99E+11 |
| ENSG00000156928 | MALSU1        | 0.39 | -2.57 | -1.36 | 1.71E-22 | -1.97E+11 | 1.97E+11 |
| ENSG00000165898 | ISCA2         | 0.43 | -2.34 | -1.23 | 1.69E-22 | -1.80E+11 | 1.80E+11 |
| ENSG00000073756 | PTGS2         | 0.45 | -2.24 | -1.17 | 1.79E-22 | -1.68E+11 | 1.68E+11 |
| ENSG00000275221 | HIST1H2AK     | 0.47 | -2.12 | -1.08 | 1.61E-22 | -1.67E+11 | 1.67E+11 |
| ENSG00000107185 | RGP1          | 2.18 | 2.18  | 1.12  | 1.85E-22 | 1.60E+11  | 1.60E+11 |
| ENSG00000159423 | ALDH4A1       | 0.38 | -2.65 | -1.41 | 2.77E-22 | -1.59E+11 | 1.59E+11 |
| ENSG00000221949 | C12orf61      | 3.57 | 3.57  | 1.84  | 5.12E-22 | 1.58E+11  | 1.58E+11 |
| ENSG00000144749 | LRIG1         | 2.36 | 2.36  | 1.24  | 2.26E-22 | 1.57E+11  | 1.57E+11 |
| ENSG00000114698 | PLSCR4        | 0.47 | -2.15 | -1.10 | 1.89E-22 | -1.56E+11 | 1.56E+11 |
| ENSG00000113360 | DROSHA        | 2.25 | 2.25  | 1.17  | 2.29E-22 | 1.49E+11  | 1.49E+11 |
| ENSG00000198286 | CARD11        | 2.18 | 2.18  | 1.13  | 2.21E-22 | 1.47E+11  | 1.47E+11 |
| ENSG00000263528 | IKBKE         | 0.43 | -2.33 | -1.22 | 2.67E-22 | -1.43E+11 | 1.43E+11 |
| ENSG00000241945 | PWP2          | 0.49 | -2.05 | -1.04 | 2.24E-22 | -1.37E+11 | 1.37E+11 |
| ENSG00000242125 | SNHG3         | 0.46 | -2.16 | -1.11 | 2.54E-22 | -1.36E+11 | 1.36E+11 |
| ENSG00000132141 | CCT6B         | 4.85 | 4.85  | 2.28  | 1.32E-21 | 1.33E+11  | 1.33E+11 |
| ENSG00000103647 | CORO2B        | 2.91 | 2.91  | 1.54  | 5.02E-22 | 1.30E+11  | 1.30E+11 |
| ENSG00000166897 | ELFN2         | 3.36 | 3.36  | 1.75  | 6.90E-22 | 1.28E+11  | 1.28E+11 |
| ENSG00000173531 | MST1          | 3.50 | 3.50  | 1.81  | 8.50E-22 | 1.20E+11  | 1.20E+11 |
| ENSG00000109046 | WSB1          | 0.45 | -2.21 | -1.15 | 3.50E-22 | -1.18E+11 | 1.18E+11 |
| ENSG00000110200 | ANAPC15       | 2.08 | 2.08  | 1.06  | 3.29E-22 | 1.15E+11  | 1.15E+11 |
| ENSG00000116574 | RHOU          | 0.21 | -4.65 | -2.22 | 1.68E-21 | -1.13E+11 | 1.13E+11 |
| ENSG00000131386 | GALNTL2       | 0.20 | -5.12 | -2.36 | 2.13E-21 | -1.11E+11 | 1.11E+11 |
| ENSG00000173821 | RNF213        | 2.76 | 2.76  | 1.47  | 6.96E-22 | 1.05E+11  | 1.05E+11 |
| ENSG00000135069 | PSAT1         | 0.47 | -2.11 | -1.08 | 5.32E-22 | -9.15E+10 | 9.15E+10 |
| ENSG00000161179 | YDJC          | 0.42 | -2.40 | -1.26 | 8.16E-22 | -8.41E+10 | 8.41E+10 |
| ENSG00000119986 | AVP11         | 0.26 | -3.88 | -1.96 | 2.24E-21 | -8.20E+10 | 8.20E+10 |
| ENSG00000177542 | SLC25A22      | 0.39 | -2.55 | -1.35 | 9.78E-22 | -8.15E+10 | 8.15E+10 |
| ENSG00000150764 | DIXDC1        | 0.46 | -2.16 | -1.11 | 7.28E-22 | -8.01E+10 | 8.01E+10 |
| ENSG00000236263 | RP11-263K19.6 | 4.47 | 4.47  | 2.16  | 3.14E-21 | 7.97E+10  | 7.97E+10 |
| ENSG00000258976 | CTD-2207P18.2 | 4.47 | 4.47  | 2.16  | 3.21E-21 | 7.88E+10  | 7.88E+10 |
| ENSG00000167680 | SEMA6B        | 2.25 | 2.25  | 1.17  | 8.37E-22 | 7.78E+10  | 7.78E+10 |
| ENSG00000169926 | KLF13         | 2.12 | 2.12  | 1.08  | 8.41E-22 | 7.31E+10  | 7.31E+10 |
| ENSG00000136244 | IL6           | 0.40 | -2.51 | -1.33 | 1.19E-21 | -7.28E+10 | 7.28E+10 |
| ENSG00000171720 | HDAC3         | 0.47 | -2.13 | -1.09 | 9.82E-22 | -6.80E+10 | 6.80E+10 |
| ENSG00000113621 | TXNDC15       | 0.46 | -2.16 | -1.11 | 1.14E-21 | -6.38E+10 | 6.38E+10 |
| ENSG00000048052 | HDAC9         | 4.28 | 4.28  | 2.10  | 5.58E-21 | 5.73E+10  | 5.73E+10 |
| ENSG00000144824 | PHLDB2        | 2.26 | 2.26  | 1.17  | 1.73E-21 | 5.43E+10  | 5.43E+10 |

|                  |              |      |       |       |          |           |          |
|------------------|--------------|------|-------|-------|----------|-----------|----------|
| ENSG00000101412  | E2F1         | 0.48 | -2.08 | -1.06 | 1.48E-21 | -5.42E+10 | 5.42E+10 |
| ENSG00000183621  | ZNF438       | 2.03 | 2.03  | 1.02  | 1.49E-21 | 5.26E+10  | 5.26E+10 |
| ENSG00000120051  | CCDC147      | 4.68 | 4.68  | 2.23  | 8.09E-21 | 5.20E+10  | 5.20E+10 |
| ENSG00000230438  | RP11-420G6.4 | 2.54 | 2.54  | 1.34  | 2.44E-21 | 5.14E+10  | 5.14E+10 |
| ENSG00000002330  | BAD          | 0.46 | -2.17 | -1.11 | 1.93E-21 | -4.93E+10 | 4.93E+10 |
| ENSG00000176978  | DPP7         | 0.48 | -2.09 | -1.06 | 1.89E-21 | -4.80E+10 | 4.80E+10 |
| ENSG00000167483  | FAM129C      | 3.62 | 3.62  | 1.85  | 5.85E-21 | 4.73E+10  | 4.73E+10 |
| ENSG00000006837  | CDKL3        | 3.02 | 3.02  | 1.59  | 4.66E-21 | 4.42E+10  | 4.42E+10 |
| ENSG00000184470  | TXNRD2       | 2.10 | 2.10  | 1.07  | 2.29E-21 | 4.38E+10  | 4.38E+10 |
| ENSG00000130479  | MAP1S        | 2.27 | 2.27  | 1.18  | 3.24E-21 | 3.98E+10  | 3.98E+10 |
| ENSG00000182511  | FES          | 0.49 | -2.05 | -1.04 | 2.93E-21 | -3.79E+10 | 3.79E+10 |
| ENSG00000221926  | TRIM16       | 2.14 | 2.14  | 1.10  | 3.36E-21 | 3.69E+10  | 3.69E+10 |
| ENSG00000100445  | SDR39U1      | 0.39 | -2.55 | -1.35 | 4.92E-21 | -3.64E+10 | 3.64E+10 |
| ENSG00000164647  | STEAP1       | 0.43 | -2.35 | -1.23 | 4.21E-21 | -3.62E+10 | 3.62E+10 |
| ENSG00000138028  | CGREF1       | 0.27 | -3.75 | -1.91 | 1.33E-20 | -3.25E+10 | 3.25E+10 |
| ENSG00000276903  | HIST1H2AL    | 0.45 | -2.20 | -1.14 | 4.75E-21 | -3.20E+10 | 3.20E+10 |
|                  | CTD-2611K5.6 | 4.46 | 4.46  | 2.16  | 1.97E-20 | 3.18E+10  | 3.18E+10 |
| ENSG00000132622  | HSPA12B      | 2.03 | 2.03  | 1.02  | 4.26E-21 | 3.11E+10  | 3.11E+10 |
| ENSG00000163170  | BOLA3        | 0.48 | -2.10 | -1.07 | 4.60E-21 | -3.09E+10 | 3.09E+10 |
| ENSG00000180834  | MAP6D1       | 0.23 | -4.34 | -2.12 | 2.02E-20 | -3.05E+10 | 3.05E+10 |
| ENSG00000172748  | ZNF596       | 2.73 | 2.73  | 1.45  | 8.92E-21 | 2.89E+10  | 2.89E+10 |
| ENSG00000120278  | PLEKHG1      | 2.68 | 2.68  | 1.42  | 8.72E-21 | 2.87E+10  | 2.87E+10 |
| ENSG00000198517  | MAFK         | 2.17 | 2.17  | 1.12  | 5.74E-21 | 2.86E+10  | 2.86E+10 |
| ENSG00000171345  | KRT19        | 2.14 | 2.14  | 1.09  | 5.64E-21 | 2.84E+10  | 2.84E+10 |
| ENSG00000108176  | DNAJC12      | 0.28 | -3.59 | -1.84 | 1.64E-20 | -2.80E+10 | 2.80E+10 |
| ENSG00000005108  | THSD7A       | 0.45 | -2.21 | -1.15 | 6.37E-21 | -2.77E+10 | 2.77E+10 |
| ENSG00000136783  | NIPSNAP3A    | 0.49 | -2.04 | -1.03 | 5.65E-21 | -2.72E+10 | 2.72E+10 |
| ENSG00000153208  | MERTK        | 2.17 | 2.17  | 1.12  | 6.37E-21 | 2.72E+10  | 2.72E+10 |
| ENSG00000079482  | OPHN1        | 0.47 | -2.13 | -1.09 | 6.70E-21 | -2.60E+10 | 2.60E+10 |
| ENSG00000126522  | ASL          | 0.49 | -2.06 | -1.04 | 6.40E-21 | -2.57E+10 | 2.57E+10 |
| ENSG00000186815  | TPCN1        | 2.34 | 2.34  | 1.23  | 1.07E-20 | 2.26E+10  | 2.26E+10 |
| ENSG00000114023  | FAM162A      | 0.48 | -2.09 | -1.07 | 9.03E-21 | -2.20E+10 | 2.20E+10 |
| ENSG00000183624  | C3orf37      | 0.47 | -2.12 | -1.09 | 9.42E-21 | -2.19E+10 | 2.19E+10 |
|                  | RP11-182J1.9 | 5.14 | 5.14  | 2.36  | 6.17E-20 | 2.07E+10  | 2.07E+10 |
| ENSG00000174130  | TLR6         | 2.48 | 2.48  | 1.31  | 1.57E-20 | 1.98E+10  | 1.98E+10 |
| ENSG00000103876  | FAH          | 0.47 | -2.12 | -1.09 | 1.27E-20 | -1.88E+10 | 1.88E+10 |
| ENSG00000131016  | AKAP12       | 2.18 | 2.18  | 1.12  | 1.40E-20 | 1.84E+10  | 1.84E+10 |
| ENSG00000139055  | ERP27        | 4.10 | 4.10  | 2.04  | 5.11E-20 | 1.81E+10  | 1.81E+10 |
| ENSG00000176422  | SPRYD4       | 0.42 | -2.38 | -1.25 | 1.75E-20 | -1.80E+10 | 1.80E+10 |
| ENSG00000145703  | IQGAP2       | 2.92 | 2.92  | 1.55  | 2.92E-20 | 1.71E+10  | 1.71E+10 |
| ENSG00000104738  | MCM4         | 0.48 | -2.09 | -1.06 | 1.69E-20 | -1.61E+10 | 1.61E+10 |
| ENSG00000007908  | SELE         | 5.55 | 5.55  | 2.47  | 1.32E-19 | 1.53E+10  | 1.53E+10 |
| ENSG00000145949  | MYLK4        | 3.74 | 3.74  | 1.90  | 6.05E-20 | 1.52E+10  | 1.52E+10 |
| ENSG00000185386  | MAPK11       | 0.45 | -2.24 | -1.16 | 2.25E-20 | -1.49E+10 | 1.49E+10 |
| ENSG000000017483 | SLC38A5      | 0.49 | -2.06 | -1.04 | 1.94E-20 | -1.48E+10 | 1.48E+10 |
| ENSG00000171552  | BCL2L1       | 2.09 | 2.09  | 1.07  | 2.05E-20 | 1.46E+10  | 1.46E+10 |
| ENSG00000111863  | ADTRP        | 2.01 | 2.01  | 1.01  | 1.94E-20 | 1.44E+10  | 1.44E+10 |
| ENSG00000196465  | MYL6B        | 0.48 | -2.10 | -1.07 | 2.17E-20 | -1.43E+10 | 1.43E+10 |
| ENSG00000163803  | PLB1         | 3.86 | 3.86  | 1.95  | 8.26E-20 | 1.34E+10  | 1.34E+10 |
| ENSG00000099889  | ARVCF        | 1.98 | 1.98  | 0.99  | 2.29E-20 | 1.31E+10  | 1.31E+10 |
| ENSG00000178878  | APOLD1       | 1.99 | 1.99  | 1.00  | 2.60E-20 | 1.24E+10  | 1.24E+10 |
| ENSG00000128311  | TST          | 2.03 | 2.03  | 1.02  | 2.73E-20 | 1.23E+10  | 1.23E+10 |
| ENSG00000197321  | SVIL         | 2.13 | 2.13  | 1.09  | 3.02E-20 | 1.23E+10  | 1.23E+10 |
| ENSG00000100196  | KDEL3        | 0.45 | -2.23 | -1.15 | 3.29E-20 | -1.23E+10 | 1.23E+10 |
| ENSG00000170264  | FAM161A      | 0.29 | -3.42 | -1.78 | 8.04E-20 | -1.21E+10 | 1.21E+10 |
| ENSG00000128052  | KDR          | 2.19 | 2.19  | 1.13  | 3.61E-20 | 1.15E+10  | 1.15E+10 |
| ENSG00000188157  | AGRN         | 2.06 | 2.06  | 1.04  | 3.24E-20 | 1.14E+10  | 1.14E+10 |
| ENSG00000162496  | DHRS3        | 1.98 | 1.98  | 0.99  | 3.06E-20 | 1.13E+10  | 1.13E+10 |
| ENSG00000186318  | BACE1        | 2.24 | 2.24  | 1.16  | 4.22E-20 | 1.09E+10  | 1.09E+10 |
| ENSG00000233818  | AP000695.4   | 2.01 | 2.01  | 1.01  | 3.47E-20 | 1.08E+10  | 1.08E+10 |
| ENSG00000148057  | IDNK         | 2.37 | 2.37  | 1.25  | 5.45E-20 | 1.02E+10  | 1.02E+10 |
| ENSG000000070785 | EIF2B3       | 0.49 | -2.05 | -1.04 | 4.11E-20 | -1.01E+10 | 1.01E+10 |
| ENSG00000092010  | PSME1        | 0.49 | -2.04 | -1.03 | 4.46E-20 | -9.66E+09 | 9.66E+09 |
| ENSG00000187134  | AKR1C1       | 0.26 | -3.85 | -1.95 | 1.75E-19 | -9.21E+09 | 9.21E+09 |
| ENSG00000130997  | POLN         | 3.16 | 3.16  | 1.66  | 1.31E-19 | 8.74E+09  | 8.74E+09 |
| ENSG00000179387  | ELMOD2       | 2.54 | 2.54  | 1.35  | 5.58E-20 | 8.68E+09  | 8.68E+09 |
| ENSG00000189134  | NKAPL        | 3.94 | 3.94  | 1.98  | 2.15E-19 | 8.49E+09  | 8.49E+09 |
| ENSG00000124575  | HIST1H1D     | 0.48 | -2.09 | -1.06 | 6.27E-20 | -8.35E+09 | 8.35E+09 |
| ENSG00000099899  | TRMT2A       | 0.50 | -2.00 | -1.00 | 5.84E-20 | -8.29E+09 | 8.29E+09 |
| ENSG00000278615  | C11orf48     | 0.49 | -2.02 | -1.02 | 5.99E-20 | -8.27E+09 | 8.27E+09 |
| ENSG00000229320  | KRT8P12      | 3.64 | 3.64  | 1.86  | 2.04E-19 | 8.06E+09  | 8.06E+09 |
| ENSG00000136305  | CIDEB        | 0.35 | -2.82 | -1.50 | 1.36E-19 | -7.65E+09 | 7.65E+09 |
| ENSG00000242498  | C15orf38     | 0.43 | -2.35 | -1.23 | 9.50E-20 | -7.63E+09 | 7.63E+09 |
| ENSG00000103152  | MPG          | 2.04 | 2.04  | 1.03  | 7.61E-20 | 7.41E+09  | 7.41E+09 |
| ENSG00000156273  | BACH1        | 2.23 | 2.23  | 1.16  | 9.30E-20 | 7.32E+09  | 7.32E+09 |
| ENSG00000081041  | CXCL2        | 0.25 | -4.02 | -2.01 | 3.10E-19 | -7.21E+09 | 7.21E+09 |
| ENSG00000061938  | TNK2         | 2.06 | 2.06  | 1.04  | 8.50E-20 | 7.07E+09  | 7.07E+09 |
| ENSG00000112039  | FANCE        | 0.46 | -2.16 | -1.11 | 9.46E-20 | -7.01E+09 | 7.01E+09 |
| ENSG00000130584  | ZBTB46       | 2.40 | 2.40  | 1.26  | 1.25E-19 | 6.79E+09  | 6.79E+09 |

|                 |                |      |       |       |          |           |          |
|-----------------|----------------|------|-------|-------|----------|-----------|----------|
| ENSG00000247679 | RP11-1277A3.1  | 3.39 | 3.39  | 1.76  | 2.79E-19 | 6.41E+09  | 6.41E+09 |
| ENSG00000263753 | LINC00667      | 1.99 | 1.99  | 0.99  | 9.96E-20 | 6.31E+09  | 6.31E+09 |
| ENSG00000184500 | PROS1          | 0.47 | -2.14 | -1.10 | 1.20E-19 | -6.19E+09 | 6.19E+09 |
| ENSG00000186603 | HPDL           | 0.34 | -2.91 | -1.54 | 2.21E-19 | -6.18E+09 | 6.18E+09 |
| ENSG00000134109 | EDEM1          | 2.19 | 2.19  | 1.13  | 1.32E-19 | 6.03E+09  | 6.03E+09 |
| ENSG00000055813 | CCDC85A        | 0.50 | -1.98 | -0.99 | 1.19E-19 | -5.74E+09 | 5.74E+09 |
| ENSG00000181218 | HIST3H2A       | 0.39 | -2.57 | -1.36 | 2.03E-19 | -5.70E+09 | 5.70E+09 |
| ENSG00000056972 | TRAF3IP2       | 1.99 | 1.99  | 0.99  | 1.22E-19 | 5.68E+09  | 5.68E+09 |
| ENSG00000092470 | WDR76          | 0.50 | -2.01 | -1.00 | 1.27E-19 | -5.62E+09 | 5.62E+09 |
| ENSG00000111339 | ART4           | 0.34 | -2.95 | -1.56 | 3.18E-19 | -5.23E+09 | 5.23E+09 |
| ENSG00000110002 | VWA5A          | 2.09 | 2.09  | 1.06  | 1.63E-19 | 5.17E+09  | 5.17E+09 |
| ENSG00000148824 | MTG1           | 0.48 | -2.06 | -1.04 | 1.62E-19 | -5.12E+09 | 5.12E+09 |
| ENSG00000189056 | RELN           | 3.96 | 3.96  | 1.99  | 6.14E-19 | 5.06E+09  | 5.06E+09 |
| ENSG00000180353 | HCLS1          | 0.46 | -2.18 | -1.13 | 1.96E-19 | -4.93E+09 | 4.93E+09 |
| ENSG00000187720 | THSD4          | 1.98 | 1.98  | 0.98  | 1.66E-19 | 4.86E+09  | 4.86E+09 |
| ENSG00000139263 | LRIG3          | 0.48 | -2.07 | -1.05 | 1.89E-19 | -4.75E+09 | 4.75E+09 |
| ENSG00000127838 | PNKD           | 0.50 | -1.98 | -0.99 | 1.85E-19 | -4.61E+09 | 4.61E+09 |
| ENSG00000118985 | ELL2           | 0.50 | -1.98 | -0.99 | 1.86E-19 | -4.60E+09 | 4.60E+09 |
| ENSG00000185504 | C17orf70       | 0.51 | -1.97 | -0.98 | 1.90E-19 | -4.53E+09 | 4.53E+09 |
| ENSG00000176658 | MYO1D          | 2.03 | 2.03  | 1.02  | 2.11E-19 | 4.42E+09  | 4.42E+09 |
|                 | RP11-492E3.1   | 1.97 | 1.97  | 0.98  | 2.13E-19 | 4.28E+09  | 4.28E+09 |
| ENSG00000099622 | CIRBP          | 0.49 | -2.02 | -1.02 | 2.35E-19 | -4.17E+09 | 4.17E+09 |
| ENSG00000162139 | NEU3           | 0.40 | -2.53 | -1.34 | 4.24E-19 | -3.88E+09 | 3.88E+09 |
| ENSG00000185838 | GNB1L          | 2.40 | 2.40  | 1.27  | 3.92E-19 | 3.84E+09  | 3.84E+09 |
| ENSG00000111445 | RFC5           | 0.50 | -1.98 | -0.99 | 2.84E-19 | -3.72E+09 | 3.72E+09 |
| ENSG00000122641 | INHBA          | 0.47 | -2.13 | -1.09 | 3.28E-19 | -3.71E+09 | 3.71E+09 |
| ENSG00000141424 | SLC39A6        | 1.94 | 1.94  | 0.95  | 3.04E-19 | 3.51E+09  | 3.51E+09 |
| ENSG00000124762 | CDKN1A         | 2.03 | 2.03  | 1.02  | 3.47E-19 | 3.45E+09  | 3.45E+09 |
| ENSG00000173918 | C1QTNF1        | 3.01 | 3.01  | 1.59  | 9.89E-19 | 3.03E+09  | 3.03E+09 |
| ENSG00000187123 | LYPD6          | 0.41 | -2.41 | -1.27 | 6.64E-19 | -2.96E+09 | 2.96E+09 |
| ENSG00000112981 | NME5           | 0.24 | -4.23 | -2.08 | 2.05E-18 | -2.95E+09 | 2.95E+09 |
| ENSG00000160404 | TOR2A          | 0.42 | -2.39 | -1.26 | 6.60E-19 | -2.94E+09 | 2.94E+09 |
| ENSG00000117682 | DHDDS          | 0.50 | -2.00 | -1.00 | 4.93E-19 | -2.84E+09 | 2.84E+09 |
| ENSG00000154258 | ABCA9          | 2.38 | 2.38  | 1.25  | 7.04E-19 | 2.84E+09  | 2.84E+09 |
| ENSG00000278535 | DHRS11         | 0.35 | -2.89 | -1.53 | 1.07E-18 | -2.80E+09 | 2.80E+09 |
| ENSG00000160447 | PKN3           | 0.51 | -1.95 | -0.96 | 5.01E-19 | -2.76E+09 | 2.76E+09 |
| ENSG00000249459 | ZNF286B        | 2.89 | 2.89  | 1.53  | 1.14E-18 | 2.71E+09  | 2.71E+09 |
| ENSG00000140941 | MAP1LC3B       | 2.04 | 2.04  | 1.03  | 6.38E-19 | 2.55E+09  | 2.55E+09 |
| ENSG00000248429 | RP11-597D13.9  | 2.35 | 2.35  | 1.23  | 8.64E-19 | 2.53E+09  | 2.53E+09 |
| ENSG00000082512 | TRAF5          | 0.48 | -2.07 | -1.05 | 6.75E-19 | -2.52E+09 | 2.52E+09 |
| ENSG00000170365 | SMAD1          | 2.71 | 2.71  | 1.44  | 1.19E-18 | 2.48E+09  | 2.48E+09 |
| ENSG00000261716 | RP11-196G18.22 | 2.40 | 2.40  | 1.26  | 9.62E-19 | 2.44E+09  | 2.44E+09 |
| ENSG00000171148 | TADA3          | 1.96 | 1.96  | 0.97  | 6.87E-19 | 2.37E+09  | 2.37E+09 |
| ENSG00000162522 | KIAA1522       | 2.43 | 2.43  | 1.28  | 1.18E-18 | 2.24E+09  | 2.24E+09 |
| ENSG00000197291 | RAMP2-AS1      | 2.61 | 2.61  | 1.38  | 1.37E-18 | 2.23E+09  | 2.23E+09 |
| ENSG00000139531 | SUOX           | 0.48 | -2.07 | -1.05 | 9.10E-19 | -2.16E+09 | 2.16E+09 |
| ENSG00000139289 | PHLDA1         | 2.11 | 2.11  | 1.08  | 9.51E-19 | 2.16E+09  | 2.16E+09 |
| ENSG00000162735 | PEX19          | 0.52 | -1.92 | -0.94 | 8.35E-19 | -2.10E+09 | 2.10E+09 |
| ENSG00000135643 | KCNMB4         | 0.31 | -3.20 | -1.68 | 2.49E-18 | -2.03E+09 | 2.03E+09 |
| ENSG00000163795 | ZNF513         | 0.44 | -2.26 | -1.18 | 1.25E-18 | -2.02E+09 | 2.02E+09 |
| ENSG00000229855 | CTC-546K23.1   | 0.25 | -4.00 | -2.00 | 4.53E-18 | -1.88E+09 | 1.88E+09 |
| ENSG00000164104 | HMG2B          | 0.49 | -2.02 | -1.02 | 1.20E-18 | -1.85E+09 | 1.85E+09 |
| ENSG00000101194 | SLC17A9        | 0.46 | -2.16 | -1.11 | 1.37E-18 | -1.85E+09 | 1.85E+09 |
| ENSG00000073737 | DHRS9          | 0.30 | -3.29 | -1.72 | 3.60E-18 | -1.73E+09 | 1.73E+09 |
| ENSG00000095370 | SH2D3C         | 1.97 | 1.97  | 0.98  | 1.33E-18 | 1.71E+09  | 1.71E+09 |
| ENSG00000124615 | MOCS1          | 0.45 | -2.20 | -1.14 | 1.75E-18 | -1.67E+09 | 1.67E+09 |
| ENSG00000064393 | HIPK2          | 2.05 | 2.05  | 1.04  | 1.52E-18 | 1.67E+09  | 1.67E+09 |
| ENSG00000013619 | MAMLD1         | 3.43 | 3.43  | 1.78  | 4.54E-18 | 1.61E+09  | 1.61E+09 |
| ENSG00000102897 | LYRM1          | 1.97 | 1.97  | 0.98  | 1.52E-18 | 1.60E+09  | 1.60E+09 |
| ENSG00000178922 | HYI            | 0.51 | -1.96 | -0.97 | 1.53E-18 | -1.59E+09 | 1.59E+09 |
| ENSG00000197077 | KIAA1671       | 2.06 | 2.06  | 1.04  | 1.74E-18 | 1.57E+09  | 1.57E+09 |
| ENSG00000142733 | MAP3K6         | 0.43 | -2.32 | -1.22 | 2.27E-18 | -1.54E+09 | 1.54E+09 |
| ENSG00000132530 | XAF1           | 0.33 | -3.06 | -1.61 | 4.04E-18 | -1.52E+09 | 1.52E+09 |
| ENSG00000073734 | ABCB11         | 3.87 | 3.87  | 1.95  | 6.63E-18 | 1.50E+09  | 1.50E+09 |
| ENSG00000233452 | STXBP5-AS1     | 2.77 | 2.77  | 1.47  | 3.66E-18 | 1.45E+09  | 1.45E+09 |
| ENSG00000261654 | RP11-96K19.4   | 3.62 | 3.62  | 1.85  | 6.62E-18 | 1.40E+09  | 1.40E+09 |
| ENSG00000159714 | ZDHHC1         | 2.32 | 2.32  | 1.21  | 2.73E-18 | 1.40E+09  | 1.40E+09 |
| ENSG00000235505 | RP11-693N9.2   | 0.43 | -2.35 | -1.23 | 2.85E-18 | -1.39E+09 | 1.39E+09 |
| ENSG00000126249 | PDCD2L         | 0.42 | -2.39 | -1.26 | 2.98E-18 | -1.38E+09 | 1.38E+09 |
| ENSG00000091844 | RGS17          | 2.43 | 2.43  | 1.28  | 3.21E-18 | 1.36E+09  | 1.36E+09 |
| ENSG00000083544 | TDRD3          | 2.10 | 2.10  | 1.07  | 2.49E-18 | 1.33E+09  | 1.33E+09 |
| ENSG00000187051 | RPS19BP1       | 0.51 | -1.95 | -0.96 | 2.20E-18 | -1.31E+09 | 1.31E+09 |
| ENSG00000134324 | LPIN1          | 2.08 | 2.08  | 1.06  | 2.68E-18 | 1.27E+09  | 1.27E+09 |
| ENSG00000250510 | GPR162         | 0.40 | -2.50 | -1.32 | 3.89E-18 | -1.27E+09 | 1.27E+09 |
| ENSG00000174370 | C11orf45       | 3.34 | 3.34  | 1.74  | 7.29E-18 | 1.24E+09  | 1.24E+09 |
| ENSG00000114450 | GNB4           | 2.01 | 2.01  | 1.01  | 2.64E-18 | 1.23E+09  | 1.23E+09 |
| ENSG00000161980 | POLR3K         | 0.43 | -2.31 | -1.20 | 3.57E-18 | -1.22E+09 | 1.22E+09 |
| ENSG00000243232 | PCDHAC2        | 0.27 | -3.67 | -1.88 | 9.07E-18 | -1.22E+09 | 1.22E+09 |
| ENSG00000186111 | PIP5K1C        | 2.02 | 2.02  | 1.02  | 2.94E-18 | 1.18E+09  | 1.18E+09 |

|                 |               |      |       |       |          |           |          |
|-----------------|---------------|------|-------|-------|----------|-----------|----------|
| ENSG00000136378 | ADAMTS7       | 1.91 | 1.91  | 0.94  | 2.67E-18 | 1.17E+09  | 1.17E+09 |
| ENSG00000162413 | KLHL21        | 1.94 | 1.94  | 0.96  | 2.77E-18 | 1.16E+09  | 1.16E+09 |
| ENSG00000183048 | SLC25A10      | 0.40 | -2.47 | -1.30 | 4.65E-18 | -1.14E+09 | 1.14E+09 |
| ENSG00000100441 | KHNYN         | 2.00 | 2.00  | 1.00  | 3.05E-18 | 1.14E+09  | 1.14E+09 |
| ENSG00000109466 | KLHL2         | 2.00 | 2.00  | 1.00  | 3.26E-18 | 1.10E+09  | 1.10E+09 |
| ENSG00000151388 | ADAMTS12      | 0.42 | -2.40 | -1.26 | 5.09E-18 | -1.06E+09 | 1.06E+09 |
| ENSG00000106415 | GLCCI1        | 2.44 | 2.44  | 1.28  | 5.56E-18 | 1.03E+09  | 1.03E+09 |
| ENSG00000132016 | C19orf57      | 3.68 | 3.68  | 1.88  | 1.30E-17 | 1.02E+09  | 1.02E+09 |
| ENSG00000160867 | FGFR4         | 3.88 | 3.88  | 1.96  | 1.57E-17 | 9.81E+08  | 9.81E+08 |
| ENSG00000138311 | ZNF365        | 3.01 | 3.01  | 1.59  | 1.02E-17 | 9.45E+08  | 9.45E+08 |
| ENSG00000205562 | RP11-497E19.1 | 2.53 | 2.53  | 1.34  | 7.35E-18 | 9.32E+08  | 9.32E+08 |
| ENSG00000166402 | TUB           | 0.46 | -2.19 | -1.13 | 5.57E-18 | -9.28E+08 | 9.28E+08 |
| ENSG00000115525 | ST3GAL5       | 1.97 | 1.97  | 0.98  | 4.87E-18 | 8.92E+08  | 8.92E+08 |
| ENSG00000116455 | WDR77         | 0.49 | -2.04 | -1.03 | 5.22E-18 | -8.92E+08 | 8.92E+08 |
| ENSG00000175352 | NRIP3         | 0.52 | -1.92 | -0.94 | 5.07E-18 | -8.50E+08 | 8.50E+08 |
| ENSG00000132561 | MATN2         | 0.21 | -4.71 | -2.24 | 3.20E-17 | -8.33E+08 | 8.33E+08 |
| ENSG00000090339 | ICAM1         | 3.60 | 3.60  | 1.85  | 2.07E-17 | 7.91E+08  | 7.91E+08 |
| ENSG00000072786 | STK10         | 1.97 | 1.97  | 0.97  | 6.18E-18 | 7.91E+08  | 7.91E+08 |
| ENSG00000163703 | CRELD1        | 0.49 | -2.06 | -1.04 | 6.79E-18 | -7.89E+08 | 7.89E+08 |
| ENSG00000105617 | LENG1         | 0.42 | -2.40 | -1.26 | 9.99E-18 | -7.59E+08 | 7.59E+08 |
| ENSG00000099219 | ERMP1         | 0.47 | -2.11 | -1.07 | 8.21E-18 | -7.35E+08 | 7.35E+08 |
| ENSG00000099998 | GGT5          | 0.44 | -2.28 | -1.19 | 9.82E-18 | -7.26E+08 | 7.26E+08 |
| ENSG00000114026 | OGG1          | 0.49 | -2.06 | -1.04 | 8.35E-18 | -7.13E+08 | 7.13E+08 |
| ENSG00000129596 | CDO1          | 0.22 | -4.45 | -2.15 | 3.90E-17 | -7.12E+08 | 7.12E+08 |
| ENSG00000122644 | ARL4A         | 0.47 | -2.11 | -1.08 | 9.05E-18 | -7.02E+08 | 7.02E+08 |
| ENSG00000100100 | PIK3IP1       | 0.26 | -3.83 | -1.94 | 3.11E-17 | -6.87E+08 | 6.87E+08 |
| ENSG00000181513 | ACBD4         | 0.34 | -2.94 | -1.56 | 1.92E-17 | -6.71E+08 | 6.71E+08 |
| ENSG00000175183 | CSRP2         | 0.44 | -2.28 | -1.19 | 1.17E-17 | -6.67E+08 | 6.67E+08 |
| ENSG00000114054 | PCCB          | 0.52 | -1.91 | -0.94 | 8.44E-18 | -6.59E+08 | 6.59E+08 |
| ENSG00000114021 | NIT2          | 0.52 | -1.92 | -0.94 | 8.98E-18 | -6.42E+08 | 6.42E+08 |
| ENSG00000188938 | FAM120AOS     | 0.53 | -1.88 | -0.91 | 8.73E-18 | -6.38E+08 | 6.38E+08 |
| ENSG00000164620 | RELL2         | 0.27 | -3.74 | -1.90 | 3.50E-17 | -6.32E+08 | 6.32E+08 |
| ENSG00000254369 | HOXA-AS3      | 3.54 | 3.54  | 1.82  | 3.19E-17 | 6.28E+08  | 6.28E+08 |
| ENSG00000109107 | ALDOC         | 0.26 | -3.79 | -1.92 | 3.90E-17 | -6.06E+08 | 6.06E+08 |
| ENSG00000134107 | BHLHE40       | 2.35 | 2.35  | 1.23  | 1.52E-17 | 6.01E+08  | 6.01E+08 |
| ENSG00000166265 | CYR1          | 0.52 | -1.91 | -0.93 | 1.03E-17 | -5.96E+08 | 5.96E+08 |
| ENSG00000168060 | NAALADL1      | 0.27 | -3.74 | -1.90 | 4.10E-17 | -5.84E+08 | 5.84E+08 |
| ENSG00000105135 | ILVBL         | 0.51 | -1.97 | -0.98 | 1.25E-17 | -5.58E+08 | 5.58E+08 |
| ENSG00000160949 | TONSL         | 0.44 | -2.28 | -1.19 | 1.69E-17 | -5.54E+08 | 5.54E+08 |
| ENSG00000132623 | ANKRD5        | 2.08 | 2.08  | 1.06  | 1.44E-17 | 5.48E+08  | 5.48E+08 |
| ENSG00000148334 | PTGES2        | 0.53 | -1.87 | -0.91 | 1.17E-17 | -5.48E+08 | 5.48E+08 |
| ENSG00000120913 | PDLIM2        | 0.48 | -2.08 | -1.05 | 1.50E-17 | -5.36E+08 | 5.36E+08 |
| ENSG00000101220 | C20orf27      | 0.49 | -2.05 | -1.03 | 1.50E-17 | -5.29E+08 | 5.29E+08 |
| ENSG00000164062 | APEH          | 0.51 | -1.96 | -0.97 | 1.56E-17 | -4.97E+08 | 4.97E+08 |
| ENSG00000124496 | TRERF1        | 0.36 | -2.80 | -1.49 | 3.37E-17 | -4.83E+08 | 4.83E+08 |
| ENSG00000079335 | CDC14A        | 1.92 | 1.92  | 0.94  | 1.59E-17 | 4.82E+08  | 4.82E+08 |
| ENSG00000174446 | SNAPC5        | 0.47 | -2.13 | -1.09 | 2.02E-17 | -4.75E+08 | 4.75E+08 |
| ENSG00000164284 | GRPEL2        | 2.09 | 2.09  | 1.06  | 1.97E-17 | 4.71E+08  | 4.71E+08 |
| ENSG00000173264 | GPR137        | 2.06 | 2.06  | 1.04  | 2.01E-17 | 4.59E+08  | 4.59E+08 |
| ENSG00000137269 | LRRC1         | 0.53 | -1.90 | -0.93 | 1.81E-17 | -4.48E+08 | 4.48E+08 |
| ENSG00000173085 | COQ2          | 0.50 | -2.01 | -1.01 | 2.08E-17 | -4.41E+08 | 4.41E+08 |
| ENSG00000073464 | CLCN4         | 0.51 | -1.97 | -0.98 | 2.03E-17 | -4.36E+08 | 4.36E+08 |
| ENSG00000162692 | VCAM1         | 0.19 | -5.19 | -2.38 | 1.42E-16 | -4.36E+08 | 4.36E+08 |
| ENSG00000203943 | SAMD13        | 2.37 | 2.37  | 1.25  | 3.17E-17 | 4.21E+08  | 4.21E+08 |
| ENSG00000254473 | RP11-522I20.3 | 3.05 | 3.05  | 1.61  | 5.33E-17 | 4.18E+08  | 4.18E+08 |
| ENSG00000141012 | GALNS         | 2.30 | 2.30  | 1.20  | 3.20E-17 | 4.07E+08  | 4.07E+08 |
| ENSG00000213983 | AP1G2         | 0.45 | -2.21 | -1.15 | 2.98E-17 | -4.05E+08 | 4.05E+08 |
| ENSG00000103253 | HAGHL         | 0.32 | -3.09 | -1.63 | 6.03E-17 | -3.98E+08 | 3.98E+08 |
| ENSG00000185100 | ADSSL1        | 4.14 | 4.14  | 2.05  | 1.10E-16 | 3.93E+08  | 3.93E+08 |
| ENSG00000052802 | MSMO1         | 0.49 | -2.04 | -1.03 | 2.72E-17 | -3.91E+08 | 3.91E+08 |
| ENSG00000189077 | TMEM120A      | 0.45 | -2.22 | -1.15 | 3.25E-17 | -3.90E+08 | 3.90E+08 |
| ENSG00000115486 | GGCX          | 0.54 | -1.87 | -0.90 | 2.33E-17 | -3.87E+08 | 3.87E+08 |
| ENSG00000105711 | SCN1B         | 0.44 | -2.26 | -1.18 | 3.44E-17 | -3.86E+08 | 3.86E+08 |
| ENSG00000106086 | PLEKHA8       | 1.89 | 1.89  | 0.91  | 2.41E-17 | 3.84E+08  | 3.84E+08 |
| ENSG00000184792 | OSBP2         | 1.95 | 1.95  | 0.96  | 2.59E-17 | 3.83E+08  | 3.83E+08 |
| ENSG00000237753 | AC079922.3    | 3.03 | 3.03  | 1.60  | 6.44E-17 | 3.77E+08  | 3.77E+08 |
| ENSG00000196639 | HRH1          | 1.95 | 1.95  | 0.97  | 2.75E-17 | 3.73E+08  | 3.73E+08 |
| ENSG00000133687 | TMTC1         | 0.32 | -3.14 | -1.65 | 7.23E-17 | -3.69E+08 | 3.69E+08 |
| ENSG00000119650 | IFT43         | 1.94 | 1.94  | 0.95  | 2.76E-17 | 3.69E+08  | 3.69E+08 |
| ENSG00000163257 | DCAF16        | 0.53 | -1.88 | -0.91 | 2.67E-17 | -3.64E+08 | 3.64E+08 |
| ENSG00000205220 | PSMB10        | 0.36 | -2.74 | -1.46 | 5.69E-17 | -3.64E+08 | 3.64E+08 |
| ENSG00000142405 | NLRP12        | 3.30 | 3.30  | 1.72  | 8.28E-17 | 3.62E+08  | 3.62E+08 |
| ENSG00000176170 | SPHK1         | 2.00 | 2.00  | 1.00  | 3.51E-17 | 3.38E+08  | 3.38E+08 |
| ENSG00000144152 | FBLN7         | 3.27 | 3.27  | 1.71  | 9.50E-17 | 3.35E+08  | 3.35E+08 |
| ENSG00000133805 | AMPD3         | 2.61 | 2.61  | 1.39  | 6.90E-17 | 3.15E+08  | 3.15E+08 |
| ENSG00000197061 | HIST1H4C      | 0.50 | -2.02 | -1.01 | 4.36E-17 | -3.06E+08 | 3.06E+08 |
| ENSG00000269728 | RP11-145M9.4  | 1.97 | 1.97  | 0.98  | 4.19E-17 | 3.04E+08  | 3.04E+08 |
| ENSG00000269343 | ZNF587B       | 0.49 | -2.04 | -1.03 | 4.87E-17 | -2.92E+08 | 2.92E+08 |
| ENSG00000128340 | RAC2          | 1.89 | 1.89  | 0.92  | 4.45E-17 | 2.83E+08  | 2.83E+08 |

|                 |                |      |       |       |          |           |          |
|-----------------|----------------|------|-------|-------|----------|-----------|----------|
| ENSG00000163171 | CDC42EP3       | 1.95 | 1.95  | 0.96  | 5.08E-17 | 2.73E+08  | 2.73E+08 |
| ENSG00000162407 | PPAP2B         | 0.52 | -1.93 | -0.95 | 5.13E-17 | -2.70E+08 | 2.70E+08 |
| ENSG00000108932 | SLC16A6        | 3.74 | 3.74  | 1.90  | 1.92E-16 | 2.70E+08  | 2.70E+08 |
| ENSG00000127528 | KLF2           | 2.15 | 2.15  | 1.10  | 6.55E-17 | 2.65E+08  | 2.65E+08 |
| ENSG00000164405 | UQCRQ          | 0.49 | -2.04 | -1.03 | 6.37E-17 | -2.55E+08 | 2.55E+08 |
| ENSG00000132330 | SCLY           | 0.38 | -2.63 | -1.40 | 1.07E-16 | -2.54E+08 | 2.54E+08 |
|                 | RP11-398F12.1  | 2.54 | 2.54  | 1.34  | 1.04E-16 | 2.48E+08  | 2.48E+08 |
| ENSG00000165434 | PGM2L1         | 2.04 | 2.04  | 1.03  | 7.07E-17 | 2.43E+08  | 2.43E+08 |
| ENSG00000100028 | SNRPD3         | 0.52 | -1.92 | -0.94 | 6.24E-17 | -2.43E+08 | 2.43E+08 |
| ENSG00000095059 | DHPS           | 0.54 | -1.87 | -0.90 | 7.07E-17 | -2.22E+08 | 2.22E+08 |
| ENSG00000172159 | FRMD3          | 0.44 | -2.25 | -1.17 | 1.07E-16 | -2.18E+08 | 2.18E+08 |
| ENSG00000142046 | TMEM91         | 0.34 | -2.93 | -1.55 | 1.87E-16 | -2.14E+08 | 2.14E+08 |
| ENSG00000130508 | PXDN           | 2.32 | 2.32  | 1.21  | 1.19E-16 | 2.13E+08  | 2.13E+08 |
| ENSG00000130733 | YIPF2          | 0.53 | -1.88 | -0.91 | 7.86E-17 | -2.12E+08 | 2.12E+08 |
| ENSG00000214753 | HNRNPUL2       | 0.49 | -2.04 | -1.03 | 9.40E-17 | -2.11E+08 | 2.11E+08 |
| ENSG00000177000 | MTHFR          | 1.96 | 1.96  | 0.97  | 8.85E-17 | 2.09E+08  | 2.09E+08 |
| ENSG00000104823 | ECH1           | 0.48 | -2.07 | -1.05 | 1.01E-16 | -2.06E+08 | 2.06E+08 |
| ENSG00000012061 | ERCC1          | 2.04 | 2.04  | 1.03  | 9.86E-17 | 2.05E+08  | 2.05E+08 |
| ENSG00000161618 | ALDH16A1       | 0.52 | -1.93 | -0.95 | 9.27E-17 | -2.01E+08 | 2.01E+08 |
| ENSG00000204308 | RNF5           | 0.52 | -1.93 | -0.95 | 9.33E-17 | -2.00E+08 | 2.00E+08 |
| ENSG00000107796 | ACTA2          | 2.11 | 2.11  | 1.08  | 1.12E-16 | 2.00E+08  | 2.00E+08 |
| ENSG00000100075 | SLC25A1        | 0.53 | -1.89 | -0.92 | 8.92E-17 | -2.00E+08 | 2.00E+08 |
| ENSG00000162944 | RFTN2          | 0.47 | -2.13 | -1.09 | 1.15E-16 | -1.99E+08 | 1.99E+08 |
| ENSG00000049130 | KITLG          | 2.78 | 2.78  | 1.48  | 2.03E-16 | 1.95E+08  | 1.95E+08 |
| ENSG00000164733 | CTSB           | 1.94 | 1.94  | 0.96  | 1.01E-16 | 1.93E+08  | 1.93E+08 |
| ENSG00000116133 | DHCR24         | 0.52 | -1.91 | -0.93 | 1.00E-16 | -1.91E+08 | 1.91E+08 |
| ENSG00000246582 | RP11-1149O23.3 | 2.27 | 2.27  | 1.18  | 1.43E-16 | 1.90E+08  | 1.90E+08 |
|                 | AC002055.4     | 2.11 | 2.11  | 1.08  | 1.27E-16 | 1.88E+08  | 1.88E+08 |
| ENSG00000198830 | HMG2           | 0.52 | -1.93 | -0.95 | 1.07E-16 | -1.87E+08 | 1.87E+08 |
| ENSG00000143344 | RGL1           | 1.94 | 1.94  | 0.96  | 1.13E-16 | 1.82E+08  | 1.82E+08 |
| ENSG00000276368 | HIST1H2AJ      | 0.49 | -2.02 | -1.02 | 1.24E-16 | -1.82E+08 | 1.82E+08 |
| ENSG00000176209 | C8orf40        | 1.99 | 1.99  | 1.00  | 1.21E-16 | 1.81E+08  | 1.81E+08 |
| ENSG00000099937 | SERPIND1       | 1.88 | 1.88  | 0.91  | 1.24E-16 | 1.68E+08  | 1.68E+08 |
| ENSG00000231389 | HLA-DPA1       | 0.43 | -2.33 | -1.22 | 1.98E-16 | -1.66E+08 | 1.66E+08 |
| ENSG00000119686 | FLVCR2         | 0.31 | -3.21 | -1.68 | 4.00E-16 | -1.61E+08 | 1.61E+08 |
| ENSG00000117298 | ECE1           | 2.41 | 2.41  | 1.27  | 2.26E-16 | 1.60E+08  | 1.60E+08 |
| ENSG00000133422 | MORC2          | 2.07 | 2.07  | 1.05  | 1.68E-16 | 1.60E+08  | 1.60E+08 |
| ENSG00000164305 | CASP3          | 1.93 | 1.93  | 0.95  | 1.46E-16 | 1.60E+08  | 1.60E+08 |
| ENSG00000278272 | HIST1H3C       | 0.50 | -2.01 | -1.01 | 1.71E-16 | -1.54E+08 | 1.54E+08 |
| ENSG00000112312 | GMNN           | 0.50 | -1.99 | -0.99 | 1.70E-16 | -1.53E+08 | 1.53E+08 |
| ENSG00000255624 | RP11-564D11.3  | 2.88 | 2.88  | 1.52  | 3.56E-16 | 1.52E+08  | 1.52E+08 |
| ENSG00000259494 | MRPL46         | 0.49 | -2.05 | -1.04 | 1.82E-16 | -1.52E+08 | 1.52E+08 |
| ENSG00000107984 | DKK1           | 0.52 | -1.92 | -0.94 | 1.71E-16 | -1.46E+08 | 1.46E+08 |
| ENSG00000175309 | AGXT2L2        | 0.53 | -1.89 | -0.91 | 1.83E-16 | -1.39E+08 | 1.39E+08 |
| ENSG00000111859 | NEDD9          | 1.91 | 1.91  | 0.93  | 1.93E-16 | 1.37E+08  | 1.37E+08 |
| ENSG00000127423 | AUNIP          | 0.45 | -2.21 | -1.14 | 2.59E-16 | -1.37E+08 | 1.37E+08 |
| ENSG00000037897 | METTL1         | 0.42 | -2.41 | -1.27 | 3.21E-16 | -1.34E+08 | 1.34E+08 |
| ENSG00000103266 | STUB1          | 0.55 | -1.83 | -0.88 | 1.88E-16 | -1.34E+08 | 1.34E+08 |
| ENSG00000260948 | RP11-552M11.8  | 3.81 | 3.81  | 1.93  | 8.17E-16 | 1.33E+08  | 1.33E+08 |
| ENSG00000136159 | NUDT15         | 0.54 | -1.86 | -0.89 | 2.00E-16 | -1.31E+08 | 1.31E+08 |
|                 | RP11-371B4.2   | 0.52 | -1.93 | -0.95 | 2.34E-16 | -1.26E+08 | 1.26E+08 |
| ENSG00000177697 | CD151          | 0.48 | -2.10 | -1.07 | 2.84E-16 | -1.25E+08 | 1.25E+08 |
| ENSG00000060642 | PIGV           | 1.99 | 1.99  | 0.99  | 2.56E-16 | 1.24E+08  | 1.24E+08 |
| ENSG00000123892 | RAB38          | 0.48 | -2.08 | -1.06 | 2.89E-16 | -1.22E+08 | 1.22E+08 |
| ENSG00000203706 | SERTAD4-AS1    | 2.30 | 2.30  | 1.20  | 3.56E-16 | 1.22E+08  | 1.22E+08 |
| ENSG00000260027 | HOXB7          | 1.85 | 1.85  | 0.89  | 2.48E-16 | 1.18E+08  | 1.18E+08 |
| ENSG00000197496 | SLC2A10        | 1.89 | 1.89  | 0.92  | 2.59E-16 | 1.17E+08  | 1.17E+08 |
| ENSG00000198700 | IPO9           | 0.52 | -1.94 | -0.95 | 2.77E-16 | -1.16E+08 | 1.16E+08 |
| ENSG00000171680 | PLEKHG5        | 1.90 | 1.90  | 0.93  | 2.72E-16 | 1.15E+08  | 1.15E+08 |
| ENSG00000246763 | CTC-463N11.3   | 3.31 | 3.31  | 1.73  | 8.56E-16 | 1.13E+08  | 1.13E+08 |
| ENSG00000187498 | COL4A1         | 2.05 | 2.05  | 1.04  | 3.30E-16 | 1.13E+08  | 1.13E+08 |
| ENSG00000136802 | LRRC8A         | 2.05 | 2.05  | 1.03  | 3.30E-16 | 1.13E+08  | 1.13E+08 |
| ENSG00000106479 | ZNF862         | 2.12 | 2.12  | 1.09  | 3.64E-16 | 1.11E+08  | 1.11E+08 |
| ENSG00000152689 | RASGRP3        | 2.17 | 2.17  | 1.12  | 3.80E-16 | 1.11E+08  | 1.11E+08 |
| ENSG00000011422 | PLAUR          | 1.89 | 1.89  | 0.92  | 2.92E-16 | 1.11E+08  | 1.11E+08 |
| ENSG00000256940 | RP11-783K16.5  | 2.30 | 2.30  | 1.20  | 4.34E-16 | 1.11E+08  | 1.11E+08 |
| ENSG00000239305 | RNF103         | 1.86 | 1.86  | 0.89  | 2.88E-16 | 1.09E+08  | 1.09E+08 |
| ENSG00000172578 | KLHL6          | 1.89 | 1.89  | 0.92  | 3.10E-16 | 1.08E+08  | 1.08E+08 |
| ENSG00000173801 | JUP            | 2.25 | 2.25  | 1.17  | 4.53E-16 | 1.06E+08  | 1.06E+08 |
| ENSG00000206395 | DDAH2          | 0.47 | -2.14 | -1.10 | 4.14E-16 | -1.05E+08 | 1.05E+08 |
| ENSG00000167695 | FAM57A         | 0.53 | -1.88 | -0.91 | 3.22E-16 | -1.05E+08 | 1.05E+08 |
| ENSG00000104983 | CCDC61         | 0.39 | -2.55 | -1.35 | 5.95E-16 | -1.05E+08 | 1.05E+08 |
| ENSG00000118292 | C1orf54        | 0.47 | -2.11 | -1.08 | 4.17E-16 | -1.03E+08 | 1.03E+08 |
| ENSG00000119969 | HELLS          | 0.54 | -1.85 | -0.88 | 3.23E-16 | -1.03E+08 | 1.03E+08 |
| ENSG00000101986 | ABCD1          | 2.27 | 2.27  | 1.18  | 4.90E-16 | 1.03E+08  | 1.03E+08 |
| ENSG00000196747 | HIST1H2AI      | 0.50 | -2.00 | -1.00 | 3.89E-16 | -1.01E+08 | 1.01E+08 |
| ENSG00000157657 | ZNF618         | 1.89 | 1.89  | 0.92  | 3.59E-16 | 9.98E+07  | 9.98E+07 |
| ENSG00000204922 | C11orf83       | 0.50 | -2.00 | -1.00 | 4.05E-16 | -9.96E+07 | 9.96E+07 |
| ENSG00000180488 | FAM73A         | 1.86 | 1.86  | 0.90  | 3.73E-16 | 9.63E+07  | 9.63E+07 |

|                  |              |      |       |       |          |           |          |
|------------------|--------------|------|-------|-------|----------|-----------|----------|
| ENSG00000243926  | TIPARP-AS1   | 3.85 | 3.85  | 1.94  | 1.64E-15 | 9.51E+07  | 9.51E+07 |
| ENSG00000111057  | KRT18        | 1.96 | 1.96  | 0.97  | 4.77E-16 | 8.98E+07  | 8.98E+07 |
| ENSG00000106003  | LFNG         | 2.73 | 2.73  | 1.45  | 9.33E-16 | 8.94E+07  | 8.94E+07 |
| ENSG00000131944  | C19orf40     | 2.05 | 2.05  | 1.03  | 5.33E-16 | 8.87E+07  | 8.87E+07 |
| ENSG00000006757  | PNPLA4       | 2.00 | 2.00  | 1.00  | 5.16E-16 | 8.81E+07  | 8.81E+07 |
| ENSG000000099377 | HSD3B7       | 0.26 | -3.83 | -1.94 | 1.98E-15 | -8.62E+07 | 8.62E+07 |
| ENSG00000174175  | SELP         | 0.30 | -3.36 | -1.75 | 1.57E-15 | -8.49E+07 | 8.49E+07 |
| ENSG00000149743  | TRPT1        | 0.50 | -2.02 | -1.01 | 5.67E-16 | -8.47E+07 | 8.47E+07 |
| ENSG00000137965  | IFI44        | 0.52 | -1.93 | -0.95 | 5.18E-16 | -8.47E+07 | 8.47E+07 |
| ENSG000000065328 | MCM10        | 0.54 | -1.84 | -0.88 | 4.88E-16 | -8.32E+07 | 8.32E+07 |
| ENSG00000143643  | TTC13        | 2.05 | 2.05  | 1.04  | 6.13E-16 | 8.30E+07  | 8.30E+07 |
| ENSG00000145675  | PIK3R1       | 1.95 | 1.95  | 0.96  | 5.67E-16 | 8.18E+07  | 8.18E+07 |
| ENSG00000104998  | IL27RA       | 0.36 | -2.80 | -1.49 | 1.20E-15 | -8.09E+07 | 8.09E+07 |
| ENSG00000277224  | HIST1H2BF    | 0.51 | -1.97 | -0.98 | 6.01E-16 | -8.04E+07 | 8.04E+07 |
| ENSG00000130714  | POMT1        | 0.48 | -2.07 | -1.05 | 6.71E-16 | -8.00E+07 | 8.00E+07 |
| ENSG00000243244  | STON1        | 0.52 | -1.93 | -0.95 | 6.13E-16 | -7.80E+07 | 7.80E+07 |
| ENSG00000138030  | KHK          | 0.33 | -3.04 | -1.61 | 1.54E-15 | -7.76E+07 | 7.76E+07 |
| ENSG00000124766  | SOX4         | 1.96 | 1.96  | 0.97  | 6.72E-16 | 7.54E+07  | 7.54E+07 |
| ENSG00000213337  | ANKRD39      | 0.34 | -2.95 | -1.56 | 1.53E-15 | -7.53E+07 | 7.53E+07 |
| ENSG00000184307  | ZDHHC23      | 0.42 | -2.36 | -1.24 | 1.02E-15 | -7.39E+07 | 7.39E+07 |
| ENSG00000171681  | ATF7IP       | 1.88 | 1.88  | 0.91  | 7.08E-16 | 7.07E+07  | 7.07E+07 |
| ENSG00000183751  | TBL3         | 0.52 | -1.92 | -0.94 | 7.42E-16 | -7.05E+07 | 7.05E+07 |
| ENSG00000121281  | ADCY7        | 0.38 | -2.64 | -1.40 | 1.41E-15 | -7.02E+07 | 7.02E+07 |
| ENSG00000109736  | MFSD10       | 0.53 | -1.90 | -0.93 | 7.35E-16 | -7.02E+07 | 7.02E+07 |
| ENSG00000230479  | AP000695.6   | 1.90 | 1.90  | 0.92  | 7.31E-16 | 7.01E+07  | 7.01E+07 |
| ENSG00000166033  | HTRA1        | 1.90 | 1.90  | 0.93  | 8.00E-16 | 6.73E+07  | 6.73E+07 |
| ENSG00000160957  | RECQL4       | 0.51 | -1.98 | -0.98 | 8.68E-16 | -6.70E+07 | 6.70E+07 |
| ENSG00000169972  | PUSL1        | 0.49 | -2.04 | -1.03 | 9.64E-16 | -6.58E+07 | 6.58E+07 |
| ENSG00000085982  | USP40        | 1.89 | 1.89  | 0.92  | 8.63E-16 | 6.43E+07  | 6.43E+07 |
| ENSG00000112667  | C6orf108     | 0.51 | -1.97 | -0.98 | 9.54E-16 | -6.37E+07 | 6.37E+07 |
| ENSG00000130962  | PRRG1        | 1.91 | 1.91  | 0.94  | 9.44E-16 | 6.23E+07  | 6.23E+07 |
| ENSG00000170190  | SLC16A5      | 2.17 | 2.17  | 1.12  | 1.24E-15 | 6.15E+07  | 6.15E+07 |
| ENSG00000176809  | LRRC37A3     | 2.66 | 2.66  | 1.41  | 1.92E-15 | 6.06E+07  | 6.06E+07 |
| ENSG00000154358  | OBSCN        | 2.40 | 2.40  | 1.26  | 1.63E-15 | 5.94E+07  | 5.94E+07 |
| ENSG00000130066  | SAT1         | 0.53 | -1.89 | -0.92 | 1.03E-15 | -5.91E+07 | 5.91E+07 |
| ENSG00000167925  | GHDC         | 0.45 | -2.24 | -1.16 | 1.48E-15 | -5.81E+07 | 5.81E+07 |
| ENSG00000138744  | NAAA         | 0.48 | -2.09 | -1.07 | 1.31E-15 | -5.79E+07 | 5.79E+07 |
| ENSG00000005073  | HOXA11       | 1.87 | 1.87  | 0.91  | 1.09E-15 | 5.67E+07  | 5.67E+07 |
| ENSG00000198055  | GRK6         | 0.54 | -1.85 | -0.89 | 1.12E-15 | -5.52E+07 | 5.52E+07 |
| ENSG00000102226  | USP11        | 0.48 | -2.07 | -1.05 | 1.41E-15 | -5.50E+07 | 5.50E+07 |
| ENSG00000160055  | TMEM234      | 0.46 | -2.16 | -1.11 | 1.54E-15 | -5.49E+07 | 5.49E+07 |
| ENSG00000090013  | BLVRB        | 1.85 | 1.85  | 0.89  | 1.14E-15 | 5.47E+07  | 5.47E+07 |
| ENSG00000185567  | AHNAK2       | 2.02 | 2.02  | 1.01  | 1.36E-15 | 5.47E+07  | 5.47E+07 |
| ENSG00000213694  | S1PR3        | 0.54 | -1.84 | -0.88 | 1.17E-15 | -5.37E+07 | 5.37E+07 |
| ENSG00000134574  | DDB2         | 1.88 | 1.88  | 0.91  | 1.27E-15 | 5.27E+07  | 5.27E+07 |
| ENSG00000231607  | DLEU2        | 0.53 | -1.89 | -0.92 | 1.33E-15 | -5.20E+07 | 5.20E+07 |
| ENSG00000143942  | CHAC2        | 0.52 | -1.93 | -0.95 | 1.47E-15 | -5.03E+07 | 5.03E+07 |
| ENSG00000151491  | EPS8         | 0.48 | -2.09 | -1.06 | 1.76E-15 | -4.99E+07 | 4.99E+07 |
| ENSG00000005187  | ACSM3        | 2.78 | 2.78  | 1.48  | 3.17E-15 | 4.94E+07  | 4.94E+07 |
| ENSG00000144036  | EXOC6B       | 1.88 | 1.88  | 0.91  | 1.52E-15 | 4.81E+07  | 4.81E+07 |
| ENSG00000122386  | ZNF205       | 0.51 | -1.98 | -0.99 | 1.74E-15 | -4.74E+07 | 4.74E+07 |
| ENSG00000151151  | IPMK         | 2.08 | 2.08  | 1.06  | 1.94E-15 | 4.72E+07  | 4.72E+07 |
| ENSG00000254703  | FLI1-AS1     | 2.07 | 2.07  | 1.05  | 1.97E-15 | 4.66E+07  | 4.66E+07 |
| ENSG00000137216  | TMEM63B      | 1.83 | 1.83  | 0.88  | 1.64E-15 | 4.53E+07  | 4.53E+07 |
| ENSG00000158195  | RP11-327L3.1 | 0.43 | -2.32 | -1.21 | 2.63E-15 | -4.52E+07 | 4.52E+07 |
| ENSG00000165071  | WASF2        | 1.93 | 1.93  | 0.95  | 1.88E-15 | 4.44E+07  | 4.44E+07 |
| ENSG00000272849  | TMEM71       | 0.35 | -2.89 | -1.53 | 4.32E-15 | -4.40E+07 | 4.40E+07 |
| ENSG00000255088  | AC084018.1   | 2.19 | 2.19  | 1.13  | 2.61E-15 | 4.30E+07  | 4.30E+07 |
| ENSG00000175063  | CCDC111      | 2.06 | 2.06  | 1.04  | 2.30E-15 | 4.30E+07  | 4.30E+07 |
| ENSG00000136295  | UBE2C        | 0.54 | -1.86 | -0.90 | 1.94E-15 | -4.23E+07 | 4.23E+07 |
| ENSG00000197928  | TTYH3        | 1.88 | 1.88  | 0.91  | 2.02E-15 | 4.18E+07  | 4.18E+07 |
| ENSG00000109472  | ZNF677       | 1.96 | 1.96  | 0.97  | 2.20E-15 | 4.17E+07  | 4.17E+07 |
| ENSG00000167522  | CPE          | 0.41 | -2.46 | -1.30 | 3.52E-15 | -4.15E+07 | 4.15E+07 |
| ENSG00000132170  | ANKRD11      | 1.88 | 1.88  | 0.91  | 2.06E-15 | 4.15E+07  | 4.15E+07 |
| ENSG00000196498  | PPARG        | 0.38 | -2.67 | -1.41 | 4.35E-15 | -4.04E+07 | 4.04E+07 |
| ENSG00000196843  | NCOR2        | 1.80 | 1.80  | 0.85  | 2.02E-15 | 4.02E+07  | 4.02E+07 |
| ENSG00000277656  | ARID5A       | 1.86 | 1.86  | 0.89  | 2.18E-15 | 3.98E+07  | 3.98E+07 |
| ENSG00000174177  | GSTT1        | 0.50 | -2.00 | -1.00 | 2.65E-15 | -3.89E+07 | 3.89E+07 |
| ENSG00000162618  | CTU2         | 0.52 | -1.92 | -0.94 | 2.64E-15 | -3.74E+07 | 3.74E+07 |
| ENSG00000241553  | ELTD1        | 1.90 | 1.90  | 0.93  | 2.74E-15 | 3.64E+07  | 3.64E+07 |
| ENSG00000115271  | ARPC4        | 0.52 | -1.93 | -0.95 | 2.90E-15 | -3.59E+07 | 3.59E+07 |
| ENSG00000132669  | GCA          | 0.49 | -2.02 | -1.02 | 3.29E-15 | -3.53E+07 | 3.53E+07 |
| ENSG00000166398  | RIN2         | 1.82 | 1.82  | 0.86  | 2.68E-15 | 3.52E+07  | 3.52E+07 |
| ENSG00000167264  | KIAA0355     | 1.93 | 1.93  | 0.95  | 3.01E-15 | 3.51E+07  | 3.51E+07 |
| ENSG00000148450  | DUS2L        | 0.53 | -1.87 | -0.91 | 2.95E-15 | -3.45E+07 | 3.45E+07 |
| ENSG00000151729  | MSRB2        | 1.91 | 1.91  | 0.93  | 3.11E-15 | 3.41E+07  | 3.41E+07 |
| ENSG00000206903  | SLC25A4      | 0.53 | -1.89 | -0.91 | 3.08E-15 | -3.40E+07 | 3.40E+07 |
| ENSG00000132780  | SNORA24      | 0.38 | -2.62 | -1.39 | 6.42E-15 | -3.27E+07 | 3.27E+07 |
| ENSG00000132780  | NASP         | 0.53 | -1.89 | -0.92 | 3.35E-15 | -3.27E+07 | 3.27E+07 |

|                  |               |      |       |       |          |           |          |
|------------------|---------------|------|-------|-------|----------|-----------|----------|
| ENSG00000127586  | CHTF18        | 0.51 | -1.95 | -0.96 | 3.58E-15 | -3.26E+07 | 3.26E+07 |
| ENSG00000163762  | TM4SF18       | 2.06 | 2.06  | 1.05  | 4.08E-15 | 3.23E+07  | 3.23E+07 |
| ENSG00000137501  | SYTL2         | 3.38 | 3.38  | 1.76  | 1.10E-14 | 3.23E+07  | 3.23E+07 |
| ENSG00000125148  | MT2A          | 0.52 | -1.92 | -0.94 | 3.52E-15 | -3.23E+07 | 3.23E+07 |
| ENSG00000184205  | TSPYL2        | 0.47 | -2.13 | -1.09 | 4.56E-15 | -3.16E+07 | 3.16E+07 |
| ENSG00000213563  | C8orf82       | 0.49 | -2.06 | -1.04 | 4.56E-15 | -3.05E+07 | 3.05E+07 |
| ENSG00000133874  | RNF122        | 2.03 | 2.03  | 1.02  | 4.51E-15 | 3.02E+07  | 3.02E+07 |
|                  | CTD-3211M3.1  | 2.66 | 2.66  | 1.41  | 7.83E-15 | 3.00E+07  | 3.00E+07 |
| ENSG00000196878  | LAMB3         | 2.60 | 2.60  | 1.38  | 7.71E-15 | 2.96E+07  | 2.96E+07 |
| ENSG00000187193  | MT1X          | 0.34 | -2.91 | -1.54 | 9.93E-15 | -2.92E+07 | 2.92E+07 |
| ENSG00000181019  | NQO1          | 0.51 | -1.95 | -0.97 | 4.51E-15 | -2.91E+07 | 2.91E+07 |
| ENSG00000228203  | RNF144A-AS1   | 2.44 | 2.44  | 1.29  | 7.08E-15 | 2.90E+07  | 2.90E+07 |
| ENSG00000127603  | KIAA0754      | 1.91 | 1.91  | 0.94  | 4.38E-15 | 2.89E+07  | 2.89E+07 |
| ENSG00000166197  | NOLC1         | 0.54 | -1.87 | -0.90 | 4.21E-15 | -2.88E+07 | 2.88E+07 |
| ENSG00000187210  | GCNT1         | 0.53 | -1.88 | -0.91 | 4.42E-15 | -2.82E+07 | 2.82E+07 |
| ENSG00000270281  | AC020910.2    | 3.26 | 3.26  | 1.71  | 1.34E-14 | 2.82E+07  | 2.82E+07 |
| ENSG00000260742  | RP11-366L5.1  | 2.70 | 2.70  | 1.43  | 9.20E-15 | 2.82E+07  | 2.82E+07 |
| ENSG00000162572  | SCNN1D        | 3.58 | 3.58  | 1.84  | 1.65E-14 | 2.79E+07  | 2.79E+07 |
| ENSG00000159788  | RGS12         | 1.82 | 1.82  | 0.87  | 4.36E-15 | 2.76E+07  | 2.76E+07 |
| ENSG00000184260  | HIST2H2AC     | 0.55 | -1.83 | -0.87 | 4.45E-15 | -2.75E+07 | 2.75E+07 |
| ENSG00000166750  | SLFN5         | 2.02 | 2.02  | 1.02  | 5.43E-15 | 2.74E+07  | 2.74E+07 |
| ENSG00000178209  | PLEC          | 2.00 | 2.00  | 1.00  | 5.36E-15 | 2.74E+07  | 2.74E+07 |
| ENSG00000162241  | SLC25A45      | 2.85 | 2.85  | 1.51  | 1.11E-14 | 2.70E+07  | 2.70E+07 |
| ENSG00000106683  | LIMK1         | 1.87 | 1.87  | 0.90  | 4.85E-15 | 2.68E+07  | 2.68E+07 |
| ENSG00000079277  | MKNK1         | 0.54 | -1.85 | -0.89 | 5.30E-15 | -2.54E+07 | 2.54E+07 |
| ENSG00000169760  | NLGN1         | 0.52 | -1.93 | -0.95 | 5.87E-15 | -2.52E+07 | 2.52E+07 |
| ENSG00000213901  | SLC23A3       | 3.10 | 3.10  | 1.63  | 1.55E-14 | 2.49E+07  | 2.49E+07 |
| ENSG00000176678  | FOXL1         | 2.37 | 2.37  | 1.25  | 9.50E-15 | 2.43E+07  | 2.43E+07 |
| ENSG00000137959  | IFI44L        | 0.33 | -3.05 | -1.61 | 1.69E-14 | -2.35E+07 | 2.35E+07 |
| ENSG00000163596  | ICA1L         | 0.43 | -2.33 | -1.22 | 1.00E-14 | -2.33E+07 | 2.33E+07 |
| ENSG00000143553  | SNAPIN        | 0.54 | -1.86 | -0.89 | 6.39E-15 | -2.32E+07 | 2.32E+07 |
| ENSG00000136859  | ANGPTL2       | 1.79 | 1.79  | 0.84  | 6.03E-15 | 2.31E+07  | 2.31E+07 |
| ENSG00000198753  | PLXNB3        | 0.30 | -3.39 | -1.76 | 2.16E-14 | -2.31E+07 | 2.31E+07 |
| ENSG00000108784  | NAGLU         | 1.85 | 1.85  | 0.89  | 6.50E-15 | 2.29E+07  | 2.29E+07 |
| ENSG00000259070  | LINC00639     | 2.93 | 2.93  | 1.55  | 1.69E-14 | 2.25E+07  | 2.25E+07 |
| ENSG000000073711 | PPP2R3A       | 1.92 | 1.92  | 0.94  | 7.45E-15 | 2.22E+07  | 2.22E+07 |
| ENSG00000203644  | AC083799.1    | 2.06 | 2.06  | 1.04  | 8.84E-15 | 2.19E+07  | 2.19E+07 |
| ENSG00000184164  | CRELD2        | 0.51 | -1.98 | -0.98 | 8.32E-15 | -2.17E+07 | 2.17E+07 |
| ENSG00000144120  | TMEM177       | 0.52 | -1.94 | -0.95 | 8.04E-15 | -2.16E+07 | 2.16E+07 |
| ENSG00000166902  | MRPL16        | 0.56 | -1.79 | -0.84 | 6.95E-15 | -2.15E+07 | 2.15E+07 |
| ENSG00000117318  | ID3           | 0.54 | -1.86 | -0.89 | 7.63E-15 | -2.13E+07 | 2.13E+07 |
| ENSG00000143816  | WNT9A         | 2.56 | 2.56  | 1.36  | 1.58E-14 | 2.04E+07  | 2.04E+07 |
| ENSG00000177406  | RP11-218M22.1 | 2.25 | 2.25  | 1.17  | 1.23E-14 | 2.03E+07  | 2.03E+07 |
| ENSG00000163092  | XIRP2         | 5.25 | 5.25  | 2.39  | 6.72E-14 | 2.02E+07  | 2.02E+07 |
| ENSG000000089127 | OAS1          | 0.52 | -1.94 | -0.95 | 9.32E-15 | -2.01E+07 | 2.01E+07 |
| ENSG00000169439  | SDC2          | 0.44 | -2.28 | -1.19 | 1.30E-14 | -2.00E+07 | 2.00E+07 |
| ENSG00000133069  | TMCC2         | 2.41 | 2.41  | 1.27  | 1.47E-14 | 1.99E+07  | 1.99E+07 |
| ENSG00000167900  | TK1           | 0.56 | -1.79 | -0.84 | 8.37E-15 | -1.96E+07 | 1.96E+07 |
| ENSG00000124587  | PEX6          | 1.88 | 1.88  | 0.91  | 9.23E-15 | 1.95E+07  | 1.95E+07 |
| ENSG00000105810  | CDK6          | 1.80 | 1.80  | 0.85  | 9.08E-15 | 1.89E+07  | 1.89E+07 |
| ENSG00000075618  | FSCN1         | 1.86 | 1.86  | 0.90  | 9.87E-15 | 1.87E+07  | 1.87E+07 |
| ENSG00000154146  | NRGN          | 0.39 | -2.57 | -1.36 | 1.93E-14 | -1.85E+07 | 1.85E+07 |
| ENSG00000120693  | SMAD9         | 0.55 | -1.82 | -0.87 | 9.75E-15 | -1.85E+07 | 1.85E+07 |
| ENSG00000253293  | HOXA10        | 0.53 | -1.88 | -0.91 | 1.05E-14 | -1.84E+07 | 1.84E+07 |
| ENSG00000067798  | NAV3          | 1.87 | 1.87  | 0.90  | 1.07E-14 | 1.81E+07  | 1.81E+07 |
| ENSG00000064687  | ABCA7         | 3.13 | 3.13  | 1.64  | 3.08E-14 | 1.78E+07  | 1.78E+07 |
| ENSG00000146072  | TNFRSF21      | 2.00 | 2.00  | 1.00  | 1.30E-14 | 1.76E+07  | 1.76E+07 |
| ENSG00000170891  | CYTL1         | 1.81 | 1.81  | 0.86  | 1.16E-14 | 1.68E+07  | 1.68E+07 |
| ENSG00000199753  | SNORD104      | 0.27 | -3.74 | -1.90 | 5.01E-14 | -1.67E+07 | 1.67E+07 |
| ENSG00000180592  | SKIDA1        | 2.72 | 2.72  | 1.45  | 2.66E-14 | 1.67E+07  | 1.67E+07 |
| ENSG00000125629  | INSIG2        | 1.76 | 1.76  | 0.82  | 1.12E-14 | 1.66E+07  | 1.66E+07 |
| ENSG00000204856  | FAM216A       | 0.53 | -1.90 | -0.93 | 1.34E-14 | -1.64E+07 | 1.64E+07 |
| ENSG00000170873  | MTSS1         | 1.81 | 1.81  | 0.85  | 1.22E-14 | 1.64E+07  | 1.64E+07 |
| ENSG00000174371  | EXO1          | 0.56 | -1.78 | -0.83 | 1.22E-14 | -1.61E+07 | 1.61E+07 |
| ENSG00000114796  | KLHL24        | 1.91 | 1.91  | 0.93  | 1.45E-14 | 1.58E+07  | 1.58E+07 |
| ENSG00000198276  | UCKL1         | 0.55 | -1.82 | -0.86 | 1.37E-14 | -1.55E+07 | 1.55E+07 |
| ENSG00000064199  | SPA17         | 1.87 | 1.87  | 0.90  | 1.46E-14 | 1.54E+07  | 1.54E+07 |
| ENSG00000068305  | MEF2A         | 1.80 | 1.80  | 0.85  | 1.38E-14 | 1.54E+07  | 1.54E+07 |
| ENSG00000008513  | ST3GAL1       | 1.86 | 1.86  | 0.90  | 1.51E-14 | 1.51E+07  | 1.51E+07 |
| ENSG00000147459  | DOCK5         | 1.84 | 1.84  | 0.88  | 1.50E-14 | 1.51E+07  | 1.51E+07 |
| ENSG00000157593  | SLC35B2       | 0.54 | -1.85 | -0.89 | 1.52E-14 | -1.50E+07 | 1.50E+07 |
| ENSG00000178026  | FAM211B       | 0.38 | -2.64 | -1.40 | 3.11E-14 | -1.50E+07 | 1.50E+07 |
|                  | RP11-566E18.3 | 1.98 | 1.98  | 0.99  | 1.79E-14 | 1.48E+07  | 1.48E+07 |
| ENSG00000122592  | HOXA7         | 1.88 | 1.88  | 0.91  | 1.65E-14 | 1.47E+07  | 1.47E+07 |
| ENSG00000128335  | APOL2         | 0.50 | -2.02 | -1.01 | 1.94E-14 | -1.45E+07 | 1.45E+07 |
| ENSG00000103254  | FAM173A       | 0.48 | -2.07 | -1.05 | 2.06E-14 | -1.45E+07 | 1.45E+07 |
| ENSG00000000971  | CFH           | 0.49 | -2.04 | -1.03 | 2.01E-14 | -1.44E+07 | 1.44E+07 |
| ENSG00000184083  | FAM120C       | 1.84 | 1.84  | 0.88  | 1.78E-14 | 1.38E+07  | 1.38E+07 |
| ENSG00000100395  | L3MBTL2       | 0.57 | -1.77 | -0.82 | 1.64E-14 | -1.38E+07 | 1.38E+07 |

|                 |               |      |       |       |          |           |          |
|-----------------|---------------|------|-------|-------|----------|-----------|----------|
| ENSG00000157168 | NRG1          | 0.53 | -1.90 | -0.93 | 1.91E-14 | -1.38E+07 | 1.38E+07 |
| ENSG00000211445 | GPX3          | 0.36 | -2.79 | -1.48 | 4.18E-14 | -1.37E+07 | 1.37E+07 |
| ENSG00000206535 | LNP1          | 2.93 | 2.93  | 1.55  | 5.01E-14 | 1.31E+07  | 1.31E+07 |
| ENSG00000113119 | TMCO6         | 0.48 | -2.08 | -1.05 | 2.64E-14 | -1.28E+07 | 1.28E+07 |
| ENSG00000162694 | EXTL2         | 0.53 | -1.89 | -0.92 | 2.21E-14 | -1.27E+07 | 1.27E+07 |
| ENSG00000171115 | GIMAP8        | 0.54 | -1.85 | -0.88 | 2.11E-14 | -1.27E+07 | 1.27E+07 |
| ENSG00000171227 | TMEM37        | 0.41 | -2.47 | -1.30 | 4.07E-14 | -1.22E+07 | 1.22E+07 |
| ENSG00000089723 | OTUB2         | 2.50 | 2.50  | 1.32  | 4.28E-14 | 1.21E+07  | 1.21E+07 |
| ENSG00000183722 | LHFP          | 0.56 | -1.77 | -0.83 | 2.22E-14 | -1.19E+07 | 1.19E+07 |
| ENSG00000160271 | RALGDS        | 1.83 | 1.83  | 0.87  | 2.36E-14 | 1.19E+07  | 1.19E+07 |
| ENSG00000205336 | GPR56         | 1.99 | 1.99  | 0.99  | 2.90E-14 | 1.17E+07  | 1.17E+07 |
| ENSG00000197081 | IGF2R         | 1.96 | 1.96  | 0.97  | 2.88E-14 | 1.16E+07  | 1.16E+07 |
| ENSG00000110047 | EHD1          | 2.08 | 2.08  | 1.06  | 3.25E-14 | 1.15E+07  | 1.15E+07 |
| ENSG00000134884 | ARGLU1        | 0.53 | -1.90 | -0.93 | 2.82E-14 | -1.13E+07 | 1.13E+07 |
| ENSG00000172086 | KRCC1         | 1.83 | 1.83  | 0.88  | 2.67E-14 | 1.12E+07  | 1.12E+07 |
| ENSG00000167216 | KATNAL2       | 2.96 | 2.96  | 1.57  | 7.48E-14 | 1.08E+07  | 1.08E+07 |
| ENSG00000101400 | SNTA1         | 2.02 | 2.02  | 1.02  | 3.51E-14 | 1.08E+07  | 1.08E+07 |
| ENSG00000213625 | LEPROT        | 1.83 | 1.83  | 0.87  | 2.91E-14 | 1.07E+07  | 1.07E+07 |
| ENSG00000143622 | RIT1          | 0.53 | -1.90 | -0.92 | 3.14E-14 | -1.07E+07 | 1.07E+07 |
| ENSG00000119899 | SLC17A5       | 1.84 | 1.84  | 0.88  | 3.04E-14 | 1.06E+07  | 1.06E+07 |
| ENSG00000112139 | MDGA1         | 3.34 | 3.34  | 1.74  | 1.01E-13 | 1.05E+07  | 1.05E+07 |
| ENSG00000106733 | NMRK1         | 1.77 | 1.77  | 0.83  | 2.86E-14 | 1.05E+07  | 1.05E+07 |
| ENSG00000104967 | NOVA2         | 1.93 | 1.93  | 0.95  | 3.57E-14 | 1.02E+07  | 1.02E+07 |
| ENSG00000019991 | HGF           | 0.28 | -3.55 | -1.83 | 1.22E-13 | -1.02E+07 | 1.02E+07 |
| ENSG00000176714 | CCDC121       | 2.46 | 2.46  | 1.30  | 5.96E-14 | 1.01E+07  | 1.01E+07 |
| ENSG00000103855 | CD276         | 1.91 | 1.91  | 0.94  | 3.82E-14 | 9.80E+06  | 9.80E+06 |
| ENSG00000065427 | KARS          | 0.55 | -1.82 | -0.87 | 3.47E-14 | -9.79E+06 | 9.79E+06 |
| ENSG00000181396 | OGFOD3        | 0.56 | -1.79 | -0.84 | 3.55E-14 | -9.53E+06 | 9.53E+06 |
| ENSG00000255198 | SNHG9         | 0.39 | -2.58 | -1.37 | 7.52E-14 | -9.42E+06 | 9.42E+06 |
| ENSG00000178035 | IMPDH2        | 0.55 | -1.83 | -0.87 | 3.80E-14 | -9.41E+06 | 9.41E+06 |
| ENSG00000068383 | INPP5A        | 1.77 | 1.77  | 0.82  | 3.64E-14 | 9.26E+06  | 9.26E+06 |
| ENSG00000101670 | LIPG          | 0.54 | -1.84 | -0.88 | 3.96E-14 | -9.23E+06 | 9.23E+06 |
| ENSG00000085415 | SEH1L         | 0.54 | -1.84 | -0.88 | 4.04E-14 | -9.17E+06 | 9.17E+06 |
| ENSG00000233822 | HIST1H2BN     | 0.54 | -1.84 | -0.88 | 4.27E-14 | -8.93E+06 | 8.93E+06 |
| ENSG00000122952 | ZWINT         | 0.56 | -1.79 | -0.84 | 4.22E-14 | -8.71E+06 | 8.71E+06 |
| ENSG00000218336 | TENM3         | 1.99 | 1.99  | 0.99  | 5.60E-14 | 8.41E+06  | 8.41E+06 |
| ENSG00000111335 | OAS2          | 0.44 | -2.25 | -1.17 | 7.32E-14 | -8.32E+06 | 8.32E+06 |
| ENSG00000109854 | HTATIP2       | 1.82 | 1.82  | 0.86  | 4.91E-14 | 8.21E+06  | 8.21E+06 |
| ENSG00000103021 | CCDC113       | 2.28 | 2.28  | 1.19  | 7.71E-14 | 8.20E+06  | 8.20E+06 |
| ENSG00000008853 | RHOBTB2       | 0.53 | -1.90 | -0.93 | 5.61E-14 | -8.04E+06 | 8.04E+06 |
| ENSG00000124787 | RPP40         | 0.56 | -1.79 | -0.84 | 5.11E-14 | -7.91E+06 | 7.91E+06 |
| ENSG00000071073 | MGAT4A        | 1.92 | 1.92  | 0.94  | 5.91E-14 | 7.88E+06  | 7.88E+06 |
| ENSG00000023697 | DERA          | 0.57 | -1.74 | -0.80 | 4.90E-14 | -7.88E+06 | 7.88E+06 |
| ENSG00000154016 | GRAP          | 1.76 | 1.76  | 0.82  | 5.01E-14 | 7.86E+06  | 7.86E+06 |
| ENSG00000107560 | RAB11FIP2     | 1.79 | 1.79  | 0.84  | 5.34E-14 | 7.76E+06  | 7.76E+06 |
| ENSG00000100297 | MCM5          | 0.52 | -1.91 | -0.93 | 6.11E-14 | -7.73E+06 | 7.73E+06 |
| ENSG00000103037 | SETD6         | 0.43 | -2.30 | -1.20 | 8.88E-14 | -7.72E+06 | 7.72E+06 |
| ENSG00000164039 | BDH2          | 0.52 | -1.91 | -0.93 | 6.27E-14 | -7.62E+06 | 7.62E+06 |
| ENSG00000226053 | RP5-1070A16.1 | 2.36 | 2.36  | 1.24  | 9.64E-14 | 7.60E+06  | 7.60E+06 |
| ENSG00000161956 | SEN3          | 0.57 | -1.77 | -0.82 | 5.47E-14 | -7.57E+06 | 7.57E+06 |
| ENSG00000114388 | NPRL2         | 0.52 | -1.92 | -0.94 | 6.78E-14 | -7.38E+06 | 7.38E+06 |
| ENSG00000225190 | PLEKHM1       | 1.87 | 1.87  | 0.90  | 6.42E-14 | 7.38E+06  | 7.38E+06 |
| ENSG00000007866 | TEAD3         | 3.31 | 3.31  | 1.72  | 2.06E-13 | 7.28E+06  | 7.28E+06 |
| ENSG00000185262 | FAM100B       | 1.93 | 1.93  | 0.95  | 7.45E-14 | 7.07E+06  | 7.07E+06 |
| ENSG00000086189 | DIMT1         | 0.57 | -1.76 | -0.81 | 6.45E-14 | -6.92E+06 | 6.92E+06 |
| ENSG00000139637 | C12orf10      | 0.55 | -1.81 | -0.85 | 7.15E-14 | -6.76E+06 | 6.76E+06 |
| ENSG00000171307 | ZDHHC16       | 0.57 | -1.76 | -0.81 | 7.21E-14 | -6.54E+06 | 6.54E+06 |
| ENSG00000136935 | GOLGA1        | 1.75 | 1.75  | 0.81  | 7.45E-14 | 6.41E+06  | 6.41E+06 |
| ENSG00000101888 | NXT2          | 1.88 | 1.88  | 0.91  | 9.75E-14 | 6.02E+06  | 6.02E+06 |
| ENSG00000008517 | IL32          | 2.12 | 2.12  | 1.08  | 1.25E-13 | 5.99E+06  | 5.99E+06 |
| ENSG00000012232 | EXTL3         | 1.91 | 1.91  | 0.93  | 1.03E-13 | 5.95E+06  | 5.95E+06 |
| ENSG00000104689 | TNFRSF10A     | 1.75 | 1.75  | 0.80  | 8.67E-14 | 5.93E+06  | 5.93E+06 |
| ENSG00000160813 | PPP1R35       | 0.55 | -1.81 | -0.85 | 9.44E-14 | -5.89E+06 | 5.89E+06 |
| ENSG00000146376 | RP11-124N14.4 | 2.88 | 2.88  | 1.53  | 2.47E-13 | 5.80E+06  | 5.80E+06 |
| ENSG00000146376 | ARHGAP18      | 2.10 | 2.10  | 1.07  | 1.31E-13 | 5.78E+06  | 5.78E+06 |
| ENSG00000213977 | TAX1BP3       | 0.47 | -2.11 | -1.07 | 1.33E-13 | -5.77E+06 | 5.77E+06 |
| ENSG00000125734 | GPR108        | 1.77 | 1.77  | 0.82  | 9.48E-14 | 5.75E+06  | 5.75E+06 |
| ENSG00000114378 | HYAL1         | 2.94 | 2.94  | 1.56  | 2.75E-13 | 5.61E+06  | 5.61E+06 |
| ENSG00000185379 | RAD51D        | 0.48 | -2.07 | -1.05 | 1.47E-13 | -5.41E+06 | 5.41E+06 |
| ENSG00000253953 | PCDHGB4       | 2.08 | 2.08  | 1.06  | 1.48E-13 | 5.40E+06  | 5.40E+06 |
| ENSG00000155115 | AC017048.4    | 3.32 | 3.32  | 1.73  | 3.84E-13 | 5.35E+06  | 5.35E+06 |
| ENSG00000155115 | GTF3C6        | 0.57 | -1.74 | -0.80 | 1.07E-13 | -5.33E+06 | 5.33E+06 |
| ENSG00000173846 | PLK3          | 1.78 | 1.78  | 0.83  | 1.19E-13 | 5.15E+06  | 5.15E+06 |
| ENSG00000230148 | HOXB-AS1      | 2.93 | 2.93  | 1.55  | 3.22E-13 | 5.15E+06  | 5.15E+06 |
| ENSG00000166446 | RP11-318M2.2  | 2.79 | 2.79  | 1.48  | 2.97E-13 | 5.12E+06  | 5.12E+06 |
| ENSG00000166446 | CDYL2         | 1.77 | 1.77  | 0.82  | 1.25E-13 | 5.00E+06  | 5.00E+06 |
| ENSG00000079156 | OSBPL6        | 0.41 | -2.44 | -1.29 | 2.51E-13 | -4.87E+06 | 4.87E+06 |
| ENSG00000167552 | TUBA1A        | 1.82 | 1.82  | 0.86  | 1.39E-13 | 4.87E+06  | 4.87E+06 |
| ENSG00000124610 | HIST1H1A      | 0.53 | -1.90 | -0.93 | 1.54E-13 | -4.85E+06 | 4.85E+06 |

|                 |               |      |       |       |          |           |          |
|-----------------|---------------|------|-------|-------|----------|-----------|----------|
| ENSG00000196290 | NIF3L1        | 0.54 | -1.86 | -0.90 | 1.53E-13 | -4.76E+06 | 4.76E+06 |
| ENSG00000253368 | TRNP1         | 1.82 | 1.82  | 0.86  | 1.46E-13 | 4.75E+06  | 4.75E+06 |
| ENSG00000100345 | MYH9          | 2.04 | 2.04  | 1.03  | 1.88E-13 | 4.71E+06  | 4.71E+06 |
| ENSG00000251432 | RP11-420A23.1 | 3.20 | 3.20  | 1.68  | 4.67E-13 | 4.69E+06  | 4.69E+06 |
| ENSG00000186496 | ZNF396        | 2.64 | 2.64  | 1.40  | 3.29E-13 | 4.61E+06  | 4.61E+06 |
| ENSG00000186409 | CCDC30        | 2.83 | 2.83  | 1.50  | 3.79E-13 | 4.60E+06  | 4.60E+06 |
| ENSG00000174628 | IQCK          | 1.84 | 1.84  | 0.88  | 1.60E-13 | 4.59E+06  | 4.59E+06 |
| ENSG00000105327 | BBC3          | 1.78 | 1.78  | 0.84  | 1.54E-13 | 4.55E+06  | 4.55E+06 |
| ENSG00000153071 | DAB2          | 1.85 | 1.85  | 0.88  | 1.65E-13 | 4.55E+06  | 4.55E+06 |
| ENSG00000134242 | PTPN22        | 0.43 | -2.32 | -1.21 | 2.71E-13 | -4.45E+06 | 4.45E+06 |
| ENSG00000010404 | IDS           | 1.83 | 1.83  | 0.87  | 1.72E-13 | 4.40E+06  | 4.40E+06 |
| ENSG00000123908 | EIF2C2        | 1.84 | 1.84  | 0.88  | 1.80E-13 | 4.33E+06  | 4.33E+06 |
| ENSG00000137752 | CASP1         | 0.37 | -2.72 | -1.44 | 4.24E-13 | -4.18E+06 | 4.18E+06 |
| ENSG00000134668 | SPOCD1        | 1.80 | 1.80  | 0.85  | 1.93E-13 | 4.10E+06  | 4.10E+06 |
| ENSG00000181350 | FAM211A       | 0.34 | -2.93 | -1.55 | 5.14E-13 | -4.08E+06 | 4.08E+06 |
| ENSG00000134215 | VAV3          | 2.39 | 2.39  | 1.26  | 3.44E-13 | 4.07E+06  | 4.07E+06 |
| ENSG00000227268 | KLLN          | 3.03 | 3.03  | 1.60  | 5.55E-13 | 4.06E+06  | 4.06E+06 |
| ENSG00000079308 | TNS1          | 1.74 | 1.74  | 0.80  | 1.96E-13 | 3.93E+06  | 3.93E+06 |
| ENSG00000135392 | DNAJC14       | 0.56 | -1.78 | -0.83 | 2.13E-13 | -3.85E+06 | 3.85E+06 |
| ENSG00000131759 | RARA          | 1.95 | 1.95  | 0.96  | 2.58E-13 | 3.84E+06  | 3.84E+06 |
| ENSG00000143387 | CTSK          | 0.51 | -1.96 | -0.97 | 2.76E-13 | -3.73E+06 | 3.73E+06 |
| ENSG00000105737 | GRIK5         | 3.03 | 3.03  | 1.60  | 6.62E-13 | 3.72E+06  | 3.72E+06 |
| ENSG00000141295 | SCRN2         | 0.56 | -1.78 | -0.83 | 2.32E-13 | -3.70E+06 | 3.70E+06 |
| ENSG00000242485 | MRPL20        | 0.58 | -1.73 | -0.79 | 2.26E-13 | -3.65E+06 | 3.65E+06 |
| ENSG00000181852 | RNF41         | 0.57 | -1.74 | -0.80 | 2.34E-13 | -3.60E+06 | 3.60E+06 |
| ENSG00000138336 | TET1          | 0.38 | -2.61 | -1.39 | 5.27E-13 | -3.60E+06 | 3.60E+06 |
|                 | CTD-2003C8.1  | 2.04 | 2.04  | 1.03  | 3.22E-13 | 3.59E+06  | 3.59E+06 |
| ENSG00000130309 | GLT25D1       | 1.80 | 1.80  | 0.85  | 2.51E-13 | 3.59E+06  | 3.59E+06 |
| ENSG00000183155 | RABIF         | 0.54 | -1.84 | -0.88 | 2.62E-13 | -3.59E+06 | 3.59E+06 |
| ENSG00000172716 | SLFN11        | 0.53 | -1.87 | -0.90 | 2.74E-13 | -3.57E+06 | 3.57E+06 |
| ENSG00000033030 | ZCCHC8        | 0.56 | -1.78 | -0.83 | 2.53E-13 | -3.54E+06 | 3.54E+06 |
| ENSG00000162545 | CAMK2N1       | 2.02 | 2.02  | 1.01  | 3.29E-13 | 3.52E+06  | 3.52E+06 |
| ENSG00000172888 | ZNF621        | 1.76 | 1.76  | 0.81  | 2.52E-13 | 3.50E+06  | 3.50E+06 |
| ENSG00000179528 | LBX2          | 2.38 | 2.38  | 1.25  | 4.72E-13 | 3.46E+06  | 3.46E+06 |
| ENSG00000185033 | SEMA4B        | 2.30 | 2.30  | 1.20  | 4.66E-13 | 3.37E+06  | 3.37E+06 |
| ENSG00000174516 | PEL13         | 0.39 | -2.59 | -1.37 | 5.90E-13 | -3.37E+06 | 3.37E+06 |
| ENSG00000150456 | N6AMT2        | 1.80 | 1.80  | 0.85  | 2.95E-13 | 3.33E+06  | 3.33E+06 |
| ENSG00000083807 | SLC27A5       | 0.44 | -2.29 | -1.19 | 4.75E-13 | -3.32E+06 | 3.32E+06 |
| ENSG00000112624 | KIAA0240      | 1.88 | 1.88  | 0.91  | 3.32E-13 | 3.27E+06  | 3.27E+06 |
| ENSG00000163297 | ANTXR2        | 1.78 | 1.78  | 0.83  | 3.07E-13 | 3.21E+06  | 3.21E+06 |
| ENSG00000174004 | LRRC33        | 2.60 | 2.60  | 1.38  | 6.75E-13 | 3.16E+06  | 3.16E+06 |
| ENSG0000014138  | POLA2         | 0.56 | -1.79 | -0.84 | 3.20E-13 | -3.16E+06 | 3.16E+06 |
| ENSG00000213949 | ITGA1         | 0.41 | -2.46 | -1.30 | 6.29E-13 | -3.10E+06 | 3.10E+06 |
| ENSG00000108262 | GIT1          | 1.75 | 1.75  | 0.81  | 3.19E-13 | 3.10E+06  | 3.10E+06 |
| ENSG00000152953 | STK32B        | 1.81 | 1.81  | 0.85  | 3.40E-13 | 3.10E+06  | 3.10E+06 |
| ENSG00000221968 | FADS3         | 1.79 | 1.79  | 0.84  | 3.38E-13 | 3.07E+06  | 3.07E+06 |
| ENSG00000068971 | PPP2R5B       | 1.76 | 1.76  | 0.82  | 3.33E-13 | 3.05E+06  | 3.05E+06 |
| ENSG00000124608 | AARS2         | 0.57 | -1.75 | -0.81 | 3.34E-13 | -3.03E+06 | 3.03E+06 |
| ENSG00000169247 | SH3TC2        | 1.93 | 1.93  | 0.95  | 4.33E-13 | 2.93E+06  | 2.93E+06 |
| ENSG00000204673 | AKT1S1        | 1.77 | 1.77  | 0.83  | 3.73E-13 | 2.91E+06  | 2.91E+06 |
| ENSG00000119760 | SUPT7L        | 0.58 | -1.72 | -0.78 | 3.55E-13 | -2.89E+06 | 2.89E+06 |
| ENSG00000163382 | APOA1BP       | 0.58 | -1.73 | -0.79 | 3.63E-13 | -2.88E+06 | 2.88E+06 |
| ENSG00000117151 | CTBS          | 1.79 | 1.79  | 0.84  | 4.08E-13 | 2.80E+06  | 2.80E+06 |
| ENSG00000121775 | TMEM39B       | 0.56 | -1.78 | -0.83 | 4.07E-13 | -2.79E+06 | 2.79E+06 |
| ENSG00000165072 | MAMDC2        | 2.34 | 2.34  | 1.23  | 7.36E-13 | 2.73E+06  | 2.73E+06 |
| ENSG00000230606 | AC159540.1    | 2.35 | 2.35  | 1.23  | 7.52E-13 | 2.71E+06  | 2.71E+06 |
| ENSG00000204514 | ZNF814        | 0.42 | -2.37 | -1.24 | 8.08E-13 | -2.63E+06 | 2.63E+06 |
| ENSG00000110871 | COQ5          | 0.56 | -1.77 | -0.83 | 4.58E-13 | -2.62E+06 | 2.62E+06 |
| ENSG00000124440 | HIF3A         | 0.38 | -2.65 | -1.41 | 1.04E-12 | -2.60E+06 | 2.60E+06 |
| ENSG00000204439 | C6orf47       | 0.56 | -1.79 | -0.84 | 5.07E-13 | -2.51E+06 | 2.51E+06 |
| ENSG00000137288 | MNF1          | 0.53 | -1.89 | -0.92 | 5.79E-13 | -2.49E+06 | 2.49E+06 |
| ENSG00000110721 | CHKA          | 1.78 | 1.78  | 0.83  | 5.13E-13 | 2.48E+06  | 2.48E+06 |
| ENSG00000243943 | ZNF512        | 0.56 | -1.79 | -0.84 | 5.20E-13 | -2.48E+06 | 2.48E+06 |
| ENSG00000272729 | AC009336.1    | 3.48 | 3.48  | 1.80  | 2.09E-12 | 2.41E+06  | 2.41E+06 |
| ENSG00000213551 | DNAJC9        | 0.57 | -1.76 | -0.82 | 5.37E-13 | -2.40E+06 | 2.40E+06 |
| ENSG00000088340 | FER1L4        | 3.97 | 3.97  | 1.99  | 2.82E-12 | 2.36E+06  | 2.36E+06 |
| ENSG00000140511 | HAPLN3        | 0.54 | -1.86 | -0.90 | 6.52E-13 | -2.31E+06 | 2.31E+06 |
| ENSG00000090376 | IRAK3         | 0.58 | -1.72 | -0.78 | 5.55E-13 | -2.30E+06 | 2.30E+06 |
| ENSG00000169189 | NSMCE1        | 1.75 | 1.75  | 0.81  | 5.92E-13 | 2.28E+06  | 2.28E+06 |
| ENSG00000185278 | ZBTB37        | 2.01 | 2.01  | 1.01  | 7.84E-13 | 2.27E+06  | 2.27E+06 |
| ENSG00000122970 | IFT81         | 1.84 | 1.84  | 0.88  | 6.65E-13 | 2.26E+06  | 2.26E+06 |
| ENSG00000260549 | MT1L          | 0.54 | -1.85 | -0.89 | 6.80E-13 | -2.25E+06 | 2.25E+06 |
| ENSG00000143314 | MRPL24        | 0.58 | -1.71 | -0.78 | 5.94E-13 | -2.22E+06 | 2.22E+06 |
| ENSG00000145287 | PLAC8         | 0.32 | -3.16 | -1.66 | 2.06E-12 | -2.20E+06 | 2.20E+06 |
| ENSG00000278463 | HIST1H2AB     | 0.57 | -1.74 | -0.80 | 6.46E-13 | -2.17E+06 | 2.17E+06 |
| ENSG00000162616 | DNAJB4        | 0.53 | -1.89 | -0.92 | 7.71E-13 | -2.15E+06 | 2.15E+06 |
| ENSG00000178149 | DALRD3        | 0.55 | -1.82 | -0.87 | 7.35E-13 | -2.13E+06 | 2.13E+06 |
| ENSG00000196781 | TLE1          | 1.79 | 1.79  | 0.84  | 7.43E-13 | 2.08E+06  | 2.08E+06 |
| ENSG00000003249 | DBNDD1        | 1.76 | 1.76  | 0.81  | 7.22E-13 | 2.07E+06  | 2.07E+06 |

|                 |            |      |       |       |          |           |          |
|-----------------|------------|------|-------|-------|----------|-----------|----------|
| ENSG00000122557 | HERPUD2    | 1.74 | 1.74  | 0.80  | 7.16E-13 | 2.06E+06  | 2.06E+06 |
| ENSG00000186665 | C17orf58   | 0.57 | -1.76 | -0.82 | 7.32E-13 | -2.06E+06 | 2.06E+06 |
| ENSG00000156873 | PHKG2      | 0.56 | -1.80 | -0.85 | 7.66E-13 | -2.06E+06 | 2.06E+06 |
| ENSG00000100292 | HMOX1      | 1.86 | 1.86  | 0.89  | 8.18E-13 | 2.05E+06  | 2.05E+06 |
| ENSG00000162591 | MEGF6      | 1.80 | 1.80  | 0.85  | 7.74E-13 | 2.05E+06  | 2.05E+06 |
| ENSG00000140265 | ZSCAN29    | 1.71 | 1.71  | 0.77  | 7.13E-13 | 2.03E+06  | 2.03E+06 |
| ENSG00000096060 | FKBP5      | 0.57 | -1.76 | -0.81 | 7.56E-13 | -2.02E+06 | 2.02E+06 |
| ENSG00000072840 | EVC        | 1.70 | 1.70  | 0.76  | 7.14E-13 | 2.01E+06  | 2.01E+06 |
| ENSG00000171105 | INSR       | 1.76 | 1.76  | 0.82  | 7.80E-13 | 1.99E+06  | 1.99E+06 |
| ENSG00000141349 | G6PC3      | 0.54 | -1.86 | -0.90 | 8.77E-13 | -1.99E+06 | 1.99E+06 |
| ENSG00000124225 | PMEP A1    | 1.73 | 1.73  | 0.79  | 7.59E-13 | 1.98E+06  | 1.98E+06 |
| ENSG00000139160 | METTL20    | 1.92 | 1.92  | 0.94  | 9.59E-13 | 1.96E+06  | 1.96E+06 |
| ENSG00000189184 | PCDH18     | 0.45 | -2.22 | -1.15 | 1.29E-12 | -1.95E+06 | 1.95E+06 |
| ENSG00000110218 | PANX1      | 1.72 | 1.72  | 0.78  | 7.78E-13 | 1.95E+06  | 1.95E+06 |
| ENSG00000103260 | METRN      | 0.50 | -2.02 | -1.01 | 1.10E-12 | -1.92E+06 | 1.92E+06 |
| ENSG00000128641 | MYO1B      | 1.80 | 1.80  | 0.85  | 9.05E-13 | 1.90E+06  | 1.90E+06 |
| ENSG00000179144 | GIMAP7     | 0.58 | -1.73 | -0.79 | 8.48E-13 | -1.88E+06 | 1.88E+06 |
| ENSG00000106404 | CLDN15     | 2.61 | 2.61  | 1.38  | 1.98E-12 | 1.85E+06  | 1.85E+06 |
| ENSG00000183431 | SF3A3      | 0.57 | -1.74 | -0.80 | 9.07E-13 | -1.83E+06 | 1.83E+06 |
| ENSG00000188522 | FAM83G     | 1.72 | 1.72  | 0.78  | 8.83E-13 | 1.83E+06  | 1.83E+06 |
| ENSG00000145912 | NHP2       | 0.58 | -1.73 | -0.79 | 9.24E-13 | -1.80E+06 | 1.80E+06 |
| ENSG00000152904 | GGPS1      | 1.77 | 1.77  | 0.83  | 1.01E-12 | 1.76E+06  | 1.76E+06 |
| ENSG00000162804 | SNED1      | 1.82 | 1.82  | 0.86  | 1.08E-12 | 1.75E+06  | 1.75E+06 |
| ENSG00000172534 | HCFC1      | 1.88 | 1.88  | 0.91  | 1.22E-12 | 1.70E+06  | 1.70E+06 |
| ENSG00000081307 | UBA5       | 0.56 | -1.78 | -0.84 | 1.10E-12 | -1.70E+06 | 1.70E+06 |
| ENSG00000276043 | UHRF1      | 0.55 | -1.82 | -0.86 | 1.15E-12 | -1.70E+06 | 1.70E+06 |
| ENSG00000136490 | LIMD2      | 0.56 | -1.80 | -0.85 | 1.13E-12 | -1.69E+06 | 1.69E+06 |
| ENSG00000084731 | KIF3C      | 1.70 | 1.70  | 0.76  | 1.04E-12 | 1.66E+06  | 1.66E+06 |
| ENSG00000161267 | BDH1       | 0.49 | -2.06 | -1.04 | 1.55E-12 | -1.65E+06 | 1.65E+06 |
| ENSG00000065911 | MTHFD2     | 0.57 | -1.75 | -0.81 | 1.13E-12 | -1.65E+06 | 1.65E+06 |
| ENSG00000129048 | CCRL1      | 0.45 | -2.20 | -1.14 | 1.81E-12 | -1.63E+06 | 1.63E+06 |
| ENSG00000100288 | CHKB       | 0.32 | -3.16 | -1.66 | 3.78E-12 | -1.62E+06 | 1.62E+06 |
| ENSG00000267855 | NDUFA7     | 0.57 | -1.76 | -0.82 | 1.18E-12 | -1.62E+06 | 1.62E+06 |
| ENSG00000233765 | AL591479.1 | 2.07 | 2.07  | 1.05  | 1.67E-12 | 1.60E+06  | 1.60E+06 |
| ENSG00000104343 | UBE2W      | 1.76 | 1.76  | 0.81  | 1.20E-12 | 1.60E+06  | 1.60E+06 |
| ENSG00000092964 | DPYSL2     | 1.89 | 1.89  | 0.92  | 1.44E-12 | 1.58E+06  | 1.58E+06 |
| ENSG00000087074 | PPP1R15A   | 1.80 | 1.80  | 0.85  | 1.32E-12 | 1.57E+06  | 1.57E+06 |
| ENSG00000130449 | ZSWIM6     | 1.72 | 1.72  | 0.78  | 1.24E-12 | 1.55E+06  | 1.55E+06 |
| ENSG00000177606 | JUN        | 1.87 | 1.87  | 0.90  | 1.48E-12 | 1.53E+06  | 1.53E+06 |
| ENSG00000118515 | SGK1       | 0.57 | -1.76 | -0.81 | 1.37E-12 | -1.50E+06 | 1.50E+06 |
| ENSG00000169105 | CHST14     | 1.74 | 1.74  | 0.80  | 1.36E-12 | 1.50E+06  | 1.50E+06 |
| ENSG00000134222 | PSRC1      | 0.55 | -1.82 | -0.87 | 1.49E-12 | -1.50E+06 | 1.50E+06 |
| ENSG00000145439 | CBR4       | 1.77 | 1.77  | 0.82  | 1.40E-12 | 1.49E+06  | 1.49E+06 |
| ENSG00000049192 | ADAMTS6    | 1.76 | 1.76  | 0.81  | 1.40E-12 | 1.49E+06  | 1.49E+06 |
| ENSG00000137767 | SQRDL      | 0.56 | -1.77 | -0.83 | 1.42E-12 | -1.49E+06 | 1.49E+06 |
| ENSG00000136560 | TANK       | 1.96 | 1.96  | 0.97  | 1.76E-12 | 1.48E+06  | 1.48E+06 |
| ENSG00000128159 | TUBGCP6    | 0.58 | -1.72 | -0.78 | 1.42E-12 | -1.44E+06 | 1.44E+06 |
| ENSG00000171608 | PIK3CD     | 2.14 | 2.14  | 1.10  | 2.20E-12 | 1.44E+06  | 1.44E+06 |
| ENSG00000196576 | PLXNB2     | 1.78 | 1.78  | 0.83  | 1.54E-12 | 1.44E+06  | 1.44E+06 |
| ENSG00000138685 | FGF2       | 0.55 | -1.81 | -0.86 | 1.62E-12 | -1.42E+06 | 1.42E+06 |
| ENSG00000159267 | HLCS       | 1.71 | 1.71  | 0.78  | 1.55E-12 | 1.38E+06  | 1.38E+06 |
| ENSG00000066427 | ATXN3      | 0.59 | -1.69 | -0.76 | 1.59E-12 | -1.34E+06 | 1.34E+06 |
| ENSG00000197142 | ACSL5      | 0.43 | -2.33 | -1.22 | 3.02E-12 | -1.34E+06 | 1.34E+06 |
| ENSG00000154920 | EME1       | 0.51 | -1.96 | -0.97 | 2.16E-12 | -1.34E+06 | 1.34E+06 |
| ENSG00000163378 | EOGT       | 0.58 | -1.73 | -0.79 | 1.73E-12 | -1.32E+06 | 1.32E+06 |
| ENSG00000134871 | COL4A2     | 2.11 | 2.11  | 1.07  | 2.56E-12 | 1.32E+06  | 1.32E+06 |
| ENSG00000167747 | C19orf48   | 0.57 | -1.77 | -0.82 | 1.93E-12 | -1.27E+06 | 1.27E+06 |
| ENSG00000111801 | BTN3A3     | 0.49 | -2.06 | -1.04 | 2.66E-12 | -1.26E+06 | 1.26E+06 |
| ENSG00000170113 | NIPA1      | 1.92 | 1.92  | 0.94  | 2.40E-12 | 1.24E+06  | 1.24E+06 |
| ENSG00000155085 | AKD1       | 2.03 | 2.03  | 1.02  | 2.67E-12 | 1.24E+06  | 1.24E+06 |
| ENSG00000128739 | SNRPN      | 1.92 | 1.92  | 0.94  | 2.39E-12 | 1.24E+06  | 1.24E+06 |
| ENSG00000119900 | OGFRL1     | 1.69 | 1.69  | 0.76  | 1.88E-12 | 1.23E+06  | 1.23E+06 |
| ENSG00000109743 | BST1       | 0.53 | -1.89 | -0.92 | 2.36E-12 | -1.23E+06 | 1.23E+06 |
| ENSG00000171476 | HOPX       | 1.92 | 1.92  | 0.94  | 2.43E-12 | 1.23E+06  | 1.23E+06 |
| ENSG00000147852 | VLDLR      | 1.97 | 1.97  | 0.98  | 2.57E-12 | 1.23E+06  | 1.23E+06 |
| ENSG00000158106 | RHPN1      | 0.54 | -1.86 | -0.89 | 2.31E-12 | -1.22E+06 | 1.22E+06 |
| ENSG00000259207 | ITGB3      | 0.58 | -1.72 | -0.79 | 2.02E-12 | -1.21E+06 | 1.21E+06 |
| ENSG00000155657 | TTN        | 2.40 | 2.40  | 1.27  | 4.02E-12 | 1.20E+06  | 1.20E+06 |
| ENSG00000110900 | TSPAN11    | 2.03 | 2.03  | 1.02  | 2.88E-12 | 1.20E+06  | 1.20E+06 |
| ENSG00000108523 | RNF167     | 0.59 | -1.71 | -0.77 | 2.06E-12 | -1.19E+06 | 1.19E+06 |
| ENSG00000232838 | PET117     | 0.36 | -2.76 | -1.47 | 5.44E-12 | -1.18E+06 | 1.18E+06 |
| ENSG00000166886 | NAB2       | 0.55 | -1.81 | -0.85 | 2.37E-12 | -1.17E+06 | 1.17E+06 |
| ENSG00000243364 | EFNA4      | 0.51 | -1.95 | -0.97 | 2.82E-12 | -1.16E+06 | 1.16E+06 |
| ENSG00000143971 | ETAA1      | 1.81 | 1.81  | 0.85  | 2.52E-12 | 1.14E+06  | 1.14E+06 |
| ENSG00000135749 | PCNXL2     | 1.84 | 1.84  | 0.88  | 2.65E-12 | 1.13E+06  | 1.13E+06 |
| ENSG00000180257 | ZNF816     | 2.02 | 2.02  | 1.01  | 3.23E-12 | 1.12E+06  | 1.12E+06 |
| ENSG00000106012 | IQCE       | 1.74 | 1.74  | 0.80  | 2.43E-12 | 1.12E+06  | 1.12E+06 |
| ENSG00000144712 | CAND2      | 0.52 | -1.93 | -0.95 | 3.04E-12 | -1.11E+06 | 1.11E+06 |
| ENSG00000169398 | PTK2       | 1.79 | 1.79  | 0.84  | 2.64E-12 | 1.10E+06  | 1.10E+06 |

|                  |              |      |       |       |          |           |          |
|------------------|--------------|------|-------|-------|----------|-----------|----------|
| ENSG00000260552  | RP11-49I11.1 | 3.26 | 3.26  | 1.70  | 8.85E-12 | 1.10E+06  | 1.10E+06 |
| ENSG00000039650  | PNKP         | 0.58 | -1.73 | -0.79 | 2.53E-12 | -1.09E+06 | 1.09E+06 |
| ENSG00000186787  | SPIN2B       | 0.37 | -2.70 | -1.43 | 6.32E-12 | -1.07E+06 | 1.07E+06 |
| ENSG00000108788  | MLX          | 0.57 | -1.76 | -0.82 | 2.72E-12 | -1.07E+06 | 1.07E+06 |
| ENSG00000126953  | TIMM8A       | 0.48 | -2.07 | -1.05 | 3.97E-12 | -1.04E+06 | 1.04E+06 |
| ENSG00000005882  | PDK2         | 0.55 | -1.82 | -0.86 | 3.13E-12 | -1.03E+06 | 1.03E+06 |
| ENSG00000159259  | CHAF1B       | 0.55 | -1.83 | -0.87 | 3.21E-12 | -1.02E+06 | 1.02E+06 |
| ENSG00000100065  | CARD10       | 1.68 | 1.68  | 0.75  | 2.92E-12 | 9.83E+05  | 9.83E+05 |
| ENSG00000132932  | ATP8A2       | 1.99 | 1.99  | 0.99  | 4.11E-12 | 9.80E+05  | 9.80E+05 |
| ENSG00000131779  | PEX11B       | 0.57 | -1.76 | -0.81 | 3.23E-12 | -9.79E+05 | 9.79E+05 |
| ENSG00000149554  | CHEK1        | 0.59 | -1.69 | -0.76 | 3.00E-12 | -9.75E+05 | 9.75E+05 |
| ENSG00000184005  | ST6GALNAC3   | 0.54 | -1.85 | -0.89 | 3.66E-12 | -9.66E+05 | 9.66E+05 |
| ENSG00000213213  | KIAA1984     | 2.56 | 2.56  | 1.36  | 7.07E-12 | 9.63E+05  | 9.63E+05 |
| ENSG00000131669  | NINJ1        | 1.70 | 1.70  | 0.76  | 3.11E-12 | 9.62E+05  | 9.62E+05 |
| ENSG00000106571  | GLI3         | 1.89 | 1.89  | 0.92  | 3.90E-12 | 9.57E+05  | 9.57E+05 |
| ENSG00000111897  | SERINC1      | 0.57 | -1.74 | -0.80 | 3.38E-12 | -9.45E+05 | 9.45E+05 |
| ENSG00000186951  | PPARA        | 1.86 | 1.86  | 0.90  | 3.90E-12 | 9.44E+05  | 9.44E+05 |
| ENSG00000132481  | TRIM47       | 1.73 | 1.73  | 0.79  | 3.39E-12 | 9.38E+05  | 9.38E+05 |
| ENSG00000155324  | GRAMD3       | 0.37 | -2.70 | -1.43 | 8.34E-12 | -9.35E+05 | 9.35E+05 |
| ENSG00000121152  | NCAPH        | 0.58 | -1.72 | -0.78 | 3.44E-12 | -9.27E+05 | 9.27E+05 |
| ENSG00000179862  | CITED4       | 2.23 | 2.23  | 1.16  | 5.98E-12 | 9.14E+05  | 9.14E+05 |
| ENSG00000169991  | IFFO2        | 1.72 | 1.72  | 0.78  | 3.56E-12 | 9.10E+05  | 9.10E+05 |
| ENSG00000213339  | QTRT1        | 0.57 | -1.77 | -0.82 | 3.78E-12 | -9.09E+05 | 9.09E+05 |
| ENSG00000196507  | TCEAL3       | 0.52 | -1.92 | -0.94 | 4.47E-12 | -9.08E+05 | 9.08E+05 |
| ENSG00000174640  | SLCO2A1      | 0.38 | -2.64 | -1.40 | 8.69E-12 | -8.95E+05 | 8.95E+05 |
| ENSG00000167083  | GNGT2        | 2.21 | 2.21  | 1.14  | 6.17E-12 | 8.90E+05  | 8.90E+05 |
| ENSG00000164045  | CDC25A       | 0.59 | -1.68 | -0.75 | 3.58E-12 | -8.89E+05 | 8.89E+05 |
| ENSG00000050165  | DKK3         | 1.82 | 1.82  | 0.86  | 4.18E-12 | 8.88E+05  | 8.88E+05 |
| ENSG00000149150  | SLC43A1      | 0.52 | -1.91 | -0.94 | 4.66E-12 | -8.87E+05 | 8.87E+05 |
| ENSG00000171729  | TMEM51       | 1.78 | 1.78  | 0.83  | 4.07E-12 | 8.80E+05  | 8.80E+05 |
| ENSG00000168591  | TMUB2        | 0.60 | -1.68 | -0.75 | 3.83E-12 | -8.58E+05 | 8.58E+05 |
| ENSG00000118960  | HS1BP3       | 1.73 | 1.73  | 0.79  | 4.09E-12 | 8.58E+05  | 8.58E+05 |
| ENSG00000110536  | PTPMT1       | 0.58 | -1.73 | -0.79 | 4.11E-12 | -8.54E+05 | 8.54E+05 |
| ENSG00000256269  | HMBS         | 0.41 | -2.42 | -1.27 | 8.17E-12 | -8.47E+05 | 8.47E+05 |
| ENSG00000103241  | FOXF1        | 1.86 | 1.86  | 0.90  | 5.18E-12 | 8.17E+05  | 8.17E+05 |
| ENSG00000100767  | PAPLN        | 0.29 | -3.40 | -1.77 | 1.74E-11 | -8.15E+05 | 8.15E+05 |
| ENSG00000162600  | OMA1         | 1.81 | 1.81  | 0.86  | 5.01E-12 | 8.10E+05  | 8.10E+05 |
| ENSG00000064652  | SNX24        | 0.52 | -1.91 | -0.93 | 5.64E-12 | -8.04E+05 | 8.04E+05 |
| ENSG00000116663  | FBXO6        | 0.38 | -2.61 | -1.38 | 1.08E-11 | -7.93E+05 | 7.93E+05 |
| ENSG00000122786  | CALD1        | 1.86 | 1.86  | 0.90  | 5.62E-12 | 7.87E+05  | 7.87E+05 |
| ENSG00000155592  | ZKSCAN2      | 1.74 | 1.74  | 0.80  | 4.91E-12 | 7.86E+05  | 7.86E+05 |
| ENSG00000089091  | DZANK1       | 2.36 | 2.36  | 1.24  | 9.26E-12 | 7.76E+05  | 7.76E+05 |
| ENSG00000130940  | CASZ1        | 2.04 | 2.04  | 1.03  | 6.98E-12 | 7.72E+05  | 7.72E+05 |
| ENSG00000095303  | PTGS1        | 0.51 | -1.96 | -0.97 | 6.46E-12 | -7.71E+05 | 7.71E+05 |
| ENSG00000072210  | ALDH3A2      | 0.59 | -1.70 | -0.77 | 4.92E-12 | -7.67E+05 | 7.67E+05 |
| ENSG00000100234  | TIMP3        | 0.55 | -1.82 | -0.87 | 5.67E-12 | -7.66E+05 | 7.66E+05 |
| ENSG00000179456  | ZNF238       | 0.60 | -1.68 | -0.75 | 4.88E-12 | -7.61E+05 | 7.61E+05 |
| ENSG00000144827  | ABHD10       | 0.60 | -1.68 | -0.75 | 4.91E-12 | -7.58E+05 | 7.58E+05 |
| ENSG00000139546  | TARBP2       | 0.60 | -1.67 | -0.74 | 4.94E-12 | -7.51E+05 | 7.51E+05 |
| ENSG00000161040  | FBXL13       | 1.89 | 1.89  | 0.92  | 6.33E-12 | 7.50E+05  | 7.50E+05 |
| ENSG00000169432  | SCN9A        | 0.50 | -2.00 | -1.00 | 7.19E-12 | -7.47E+05 | 7.47E+05 |
| ENSG00000188486  | H2AFX        | 0.58 | -1.72 | -0.78 | 5.39E-12 | -7.40E+05 | 7.40E+05 |
| ENSG00000177666  | PNPLA2       | 0.53 | -1.87 | -0.91 | 6.44E-12 | -7.39E+05 | 7.39E+05 |
| ENSG00000141867  | BRD4         | 1.81 | 1.81  | 0.85  | 6.06E-12 | 7.34E+05  | 7.34E+05 |
| ENSG00000118523  | CTGF         | 0.58 | -1.73 | -0.79 | 5.78E-12 | -7.20E+05 | 7.20E+05 |
| ENSG00000174206  | C12orf66     | 2.03 | 2.03  | 1.02  | 7.95E-12 | 7.19E+05  | 7.19E+05 |
| ENSG00000144655  | CSRNP1       | 1.69 | 1.69  | 0.75  | 5.54E-12 | 7.16E+05  | 7.16E+05 |
| ENSG00000148730  | EIF4EBP2     | 1.75 | 1.75  | 0.81  | 6.04E-12 | 7.14E+05  | 7.14E+05 |
| ENSG00000206530  | WDR52        | 2.17 | 2.17  | 1.12  | 9.38E-12 | 7.10E+05  | 7.10E+05 |
| ENSG00000133597  | ADCK2        | 1.72 | 1.72  | 0.78  | 6.15E-12 | 6.94E+05  | 6.94E+05 |
| ENSG00000185808  | PIGP         | 1.79 | 1.79  | 0.84  | 6.72E-12 | 6.91E+05  | 6.91E+05 |
| ENSG000000087152 | ATXN7L3      | 1.70 | 1.70  | 0.77  | 6.52E-12 | 6.67E+05  | 6.67E+05 |
| ENSG00000026103  | FAS          | 1.78 | 1.78  | 0.83  | 7.16E-12 | 6.66E+05  | 6.66E+05 |
| ENSG00000119280  | C1orf198     | 1.69 | 1.69  | 0.76  | 7.05E-12 | 6.38E+05  | 6.38E+05 |
| ENSG00000165912  | PACSL1       | 0.56 | -1.77 | -0.83 | 7.98E-12 | -6.28E+05 | 6.28E+05 |
| ENSG00000137070  | IL11RA       | 2.01 | 2.01  | 1.01  | 1.03E-11 | 6.28E+05  | 6.28E+05 |
| ENSG00000140564  | FURIN        | 1.74 | 1.74  | 0.80  | 7.68E-12 | 6.27E+05  | 6.27E+05 |
| ENSG00000183323  | CCDC125      | 0.56 | -1.78 | -0.83 | 8.21E-12 | -6.22E+05 | 6.22E+05 |
| ENSG00000116199  | FAM20B       | 0.58 | -1.72 | -0.78 | 7.67E-12 | -6.22E+05 | 6.22E+05 |
| ENSG00000132004  | FBXW9        | 0.53 | -1.88 | -0.91 | 9.15E-12 | -6.20E+05 | 6.20E+05 |
| ENSG00000142634  | EFHD2        | 1.72 | 1.72  | 0.79  | 7.73E-12 | 6.20E+05  | 6.20E+05 |
| ENSG00000035499  | DEPDC1B      | 0.59 | -1.71 | -0.77 | 7.58E-12 | -6.20E+05 | 6.20E+05 |
| ENSG00000256632  | PXMP2        | 0.56 | -1.79 | -0.84 | 8.66E-12 | -6.08E+05 | 6.08E+05 |
| ENSG00000258738  | RP11-73E17.2 | 2.05 | 2.05  | 1.04  | 1.15E-11 | 6.05E+05  | 6.05E+05 |
| ENSG00000184292  | TACSTD2      | 1.70 | 1.70  | 0.76  | 7.94E-12 | 6.02E+05  | 6.02E+05 |
| ENSG00000249673  | NOP14-AS1    | 0.35 | -2.84 | -1.51 | 2.25E-11 | -5.99E+05 | 5.99E+05 |
| ENSG00000115392  | FANCL        | 0.58 | -1.71 | -0.77 | 8.21E-12 | -5.97E+05 | 5.97E+05 |
| ENSG00000106610  | STAG3L4      | 0.48 | -2.08 | -1.05 | 1.22E-11 | -5.95E+05 | 5.95E+05 |
| ENSG00000158552  | ZFAND2B      | 0.56 | -1.79 | -0.84 | 9.22E-12 | -5.91E+05 | 5.91E+05 |

|                 |              |      |       |       |          |           |          |
|-----------------|--------------|------|-------|-------|----------|-----------|----------|
| ENSG00000143977 | SNRPG        | 0.52 | -1.91 | -0.93 | 1.05E-11 | -5.89E+05 | 5.89E+05 |
| ENSG00000160703 | NLRX1        | 1.91 | 1.91  | 0.94  | 1.05E-11 | 5.89E+05  | 5.89E+05 |
| ENSG00000176485 | PLA2G16      | 0.60 | -1.67 | -0.74 | 8.03E-12 | -5.88E+05 | 5.88E+05 |
| ENSG00000141736 | ERBB2        | 0.55 | -1.81 | -0.86 | 9.75E-12 | -5.81E+05 | 5.81E+05 |
| ENSG00000258376 | RP4-647C14.2 | 0.39 | -2.59 | -1.37 | 2.07E-11 | -5.69E+05 | 5.69E+05 |
| ENSG00000172071 | EIF2AK3      | 1.66 | 1.66  | 0.73  | 8.72E-12 | 5.62E+05  | 5.62E+05 |
| ENSG00000119522 | DENND1A      | 0.58 | -1.72 | -0.78 | 9.42E-12 | -5.60E+05 | 5.60E+05 |
| ENSG00000168685 | IL7R         | 0.37 | -2.71 | -1.44 | 2.37E-11 | -5.57E+05 | 5.57E+05 |
| ENSG00000058668 | ATP2B4       | 1.73 | 1.73  | 0.79  | 9.74E-12 | 5.54E+05  | 5.54E+05 |
| ENSG00000161692 | DBF4B        | 0.52 | -1.93 | -0.95 | 1.24E-11 | -5.49E+05 | 5.49E+05 |
| ENSG00000136463 | TACO1        | 0.60 | -1.66 | -0.73 | 9.37E-12 | -5.42E+05 | 5.42E+05 |
| ENSG00000216937 | C10orf68     | 2.71 | 2.71  | 1.44  | 2.55E-11 | 5.37E+05  | 5.37E+05 |
| ENSG00000054793 | ATP9A        | 1.71 | 1.71  | 0.77  | 1.04E-11 | 5.30E+05  | 5.30E+05 |
| ENSG00000139613 | SMARCC2      | 0.58 | -1.73 | -0.79 | 1.10E-11 | -5.21E+05 | 5.21E+05 |
| ENSG00000197885 | NKIRAS1      | 0.51 | -1.96 | -0.97 | 1.43E-11 | -5.18E+05 | 5.18E+05 |
| ENSG00000127328 | RAB3IP       | 0.61 | -1.65 | -0.72 | 1.07E-11 | -5.03E+05 | 5.03E+05 |
| ENSG00000183258 | DDX41        | 0.60 | -1.68 | -0.75 | 1.11E-11 | -5.03E+05 | 5.03E+05 |
| ENSG00000183955 | SETD8        | 1.72 | 1.72  | 0.78  | 1.19E-11 | 4.98E+05  | 4.98E+05 |
| ENSG00000120314 | WDR55        | 0.59 | -1.68 | -0.75 | 1.15E-11 | -4.96E+05 | 4.96E+05 |
| ENSG00000119718 | EIF2B2       | 1.69 | 1.69  | 0.76  | 1.19E-11 | 4.90E+05  | 4.90E+05 |
| ENSG00000140905 | GCSH         | 0.58 | -1.72 | -0.78 | 1.25E-11 | -4.86E+05 | 4.86E+05 |
| ENSG00000135636 | DYSF         | 1.74 | 1.74  | 0.80  | 1.31E-11 | 4.81E+05  | 4.81E+05 |
| ENSG00000187513 | GJA4         | 0.38 | -2.61 | -1.38 | 2.97E-11 | -4.78E+05 | 4.78E+05 |
| ENSG00000239900 | ADSL         | 0.59 | -1.69 | -0.76 | 1.26E-11 | -4.76E+05 | 4.76E+05 |
| ENSG00000181924 | COA4         | 0.60 | -1.66 | -0.73 | 1.25E-11 | -4.70E+05 | 4.70E+05 |
| ENSG00000078674 | PCM1         | 0.37 | -2.69 | -1.43 | 3.30E-11 | -4.68E+05 | 4.68E+05 |
| ENSG00000265681 | RPL17        | 0.50 | -2.00 | -1.00 | 1.82E-11 | -4.68E+05 | 4.68E+05 |
| ENSG00000120699 | EXOSC8       | 0.59 | -1.68 | -0.75 | 1.35E-11 | -4.59E+05 | 4.59E+05 |
| ENSG00000168101 | NUDT16L1     | 0.57 | -1.76 | -0.82 | 1.51E-11 | -4.52E+05 | 4.52E+05 |
| ENSG00000138617 | PARP16       | 1.80 | 1.80  | 0.84  | 1.58E-11 | 4.52E+05  | 4.52E+05 |
| ENSG00000137094 | DNAJB5       | 0.55 | -1.82 | -0.87 | 1.64E-11 | -4.50E+05 | 4.50E+05 |
| ENSG00000100034 | PPM1F        | 1.71 | 1.71  | 0.77  | 1.47E-11 | 4.46E+05  | 4.46E+05 |
| ENSG00000197385 | ZNF860       | 2.27 | 2.27  | 1.18  | 2.79E-11 | 4.29E+05  | 4.29E+05 |
| ENSG00000108551 | RASD1        | 2.56 | 2.56  | 1.36  | 3.57E-11 | 4.29E+05  | 4.29E+05 |
| ENSG00000168542 | COL3A1       | 0.44 | -2.27 | -1.18 | 2.82E-11 | -4.28E+05 | 4.28E+05 |
|                 | RP5-995J12.2 | 2.17 | 2.17  | 1.12  | 2.58E-11 | 4.27E+05  | 4.27E+05 |
| ENSG00000100577 | GSTZ1        | 1.81 | 1.81  | 0.86  | 1.81E-11 | 4.25E+05  | 4.25E+05 |
| ENSG00000173786 | CNP          | 0.58 | -1.71 | -0.77 | 1.64E-11 | -4.22E+05 | 4.22E+05 |
| ENSG00000135617 | PRADC1       | 0.57 | -1.75 | -0.81 | 1.73E-11 | -4.20E+05 | 4.20E+05 |
| ENSG00000186591 | UBE2H        | 1.70 | 1.70  | 0.77  | 1.65E-11 | 4.20E+05  | 4.20E+05 |
| ENSG00000096433 | ITPR3        | 1.95 | 1.95  | 0.97  | 2.20E-11 | 4.17E+05  | 4.17E+05 |
| ENSG00000189007 | ADAT2        | 0.54 | -1.87 | -0.90 | 2.02E-11 | -4.15E+05 | 4.15E+05 |
| ENSG00000215375 | MYL5         | 1.80 | 1.80  | 0.85  | 1.89E-11 | 4.14E+05  | 4.14E+05 |
| ENSG0000010818  | HIVEP2       | 1.79 | 1.79  | 0.84  | 1.87E-11 | 4.14E+05  | 4.14E+05 |
| ENSG00000253552 | HOXA-AS2     | 1.87 | 1.87  | 0.90  | 2.08E-11 | 4.10E+05  | 4.10E+05 |
| ENSG00000080845 | DLGAP4       | 1.68 | 1.68  | 0.75  | 1.69E-11 | 4.09E+05  | 4.09E+05 |
| ENSG00000128228 | SDF2L1       | 0.53 | -1.88 | -0.91 | 2.13E-11 | -4.07E+05 | 4.07E+05 |
| ENSG00000235106 | LINC00094    | 0.57 | -1.75 | -0.81 | 1.90E-11 | -4.01E+05 | 4.01E+05 |
| ENSG00000073331 | ALPK1        | 0.48 | -2.10 | -1.07 | 2.80E-11 | -3.98E+05 | 3.98E+05 |
| ENSG0000026950  | BTN3A1       | 0.57 | -1.75 | -0.81 | 1.96E-11 | -3.96E+05 | 3.96E+05 |
| ENSG00000176907 | C8orf4       | 2.17 | 2.17  | 1.12  | 3.03E-11 | 3.93E+05  | 3.93E+05 |
| ENSG00000148180 | GSN          | 1.71 | 1.71  | 0.77  | 1.90E-11 | 3.91E+05  | 3.91E+05 |
| ENSG00000204267 | TAP2         | 0.60 | -1.65 | -0.73 | 1.79E-11 | -3.91E+05 | 3.91E+05 |
|                 | RP11-134G8.8 | 2.70 | 2.70  | 1.43  | 4.76E-11 | 3.91E+05  | 3.91E+05 |
| ENSG00000189057 | FAM111B      | 0.55 | -1.83 | -0.87 | 2.20E-11 | -3.90E+05 | 3.90E+05 |
| ENSG00000182134 | TDRKH        | 0.52 | -1.92 | -0.94 | 2.44E-11 | -3.89E+05 | 3.89E+05 |
| ENSG00000185324 | CDK10        | 0.60 | -1.67 | -0.74 | 1.92E-11 | -3.81E+05 | 3.81E+05 |
| ENSG00000010626 | LRRC23       | 2.24 | 2.24  | 1.16  | 3.57E-11 | 3.75E+05  | 3.75E+05 |
| ENSG00000074935 | TUBE1        | 0.58 | -1.73 | -0.79 | 2.12E-11 | -3.75E+05 | 3.75E+05 |
| ENSG00000168528 | SERINC2      | 2.66 | 2.66  | 1.41  | 5.06E-11 | 3.74E+05  | 3.74E+05 |
| ENSG00000161013 | MGAT4B       | 1.75 | 1.75  | 0.81  | 2.18E-11 | 3.74E+05  | 3.74E+05 |
| ENSG00000205133 | TRIQK        | 1.87 | 1.87  | 0.90  | 2.74E-11 | 3.57E+05  | 3.57E+05 |
| ENSG00000197530 | MIB2         | 1.71 | 1.71  | 0.78  | 2.33E-11 | 3.55E+05  | 3.55E+05 |
| ENSG00000184900 | SUMO3        | 0.59 | -1.69 | -0.76 | 2.32E-11 | -3.51E+05 | 3.51E+05 |
| ENSG00000164172 | MOCS2        | 0.59 | -1.69 | -0.75 | 2.35E-11 | -3.48E+05 | 3.48E+05 |
| ENSG00000169738 | DCXR         | 0.53 | -1.89 | -0.92 | 3.03E-11 | -3.44E+05 | 3.44E+05 |
| ENSG00000196678 | ERI2         | 1.75 | 1.75  | 0.81  | 2.62E-11 | 3.41E+05  | 3.41E+05 |
| ENSG00000255717 | SNHG1        | 0.59 | -1.69 | -0.76 | 2.46E-11 | -3.41E+05 | 3.41E+05 |
| ENSG00000155729 | KCTD18       | 1.70 | 1.70  | 0.76  | 2.49E-11 | 3.40E+05  | 3.40E+05 |
| ENSG00000100023 | PPIL2        | 0.61 | -1.64 | -0.71 | 2.34E-11 | -3.39E+05 | 3.39E+05 |
| ENSG00000158301 | GPRASP2      | 0.56 | -1.79 | -0.84 | 2.89E-11 | -3.33E+05 | 3.33E+05 |
| ENSG00000113595 | TRIM23       | 1.88 | 1.88  | 0.91  | 3.21E-11 | 3.32E+05  | 3.32E+05 |
| ENSG00000109323 | MANBA        | 0.54 | -1.86 | -0.90 | 3.17E-11 | -3.31E+05 | 3.31E+05 |
| ENSG00000134243 | SORT1        | 0.52 | -1.93 | -0.94 | 3.39E-11 | -3.31E+05 | 3.31E+05 |
|                 | CTA-217C2.1  | 1.83 | 1.83  | 0.87  | 3.09E-11 | 3.29E+05  | 3.29E+05 |
| ENSG00000111641 | NOP2         | 0.61 | -1.63 | -0.70 | 2.58E-11 | -3.21E+05 | 3.21E+05 |
| ENSG00000140937 | CDH11        | 0.49 | -2.04 | -1.03 | 4.09E-11 | -3.18E+05 | 3.18E+05 |
| ENSG00000136068 | FLNB         | 2.01 | 2.01  | 1.01  | 4.03E-11 | 3.16E+05  | 3.16E+05 |
| ENSG00000143575 | HAX1         | 0.60 | -1.66 | -0.73 | 2.79E-11 | -3.14E+05 | 3.14E+05 |

|                  |               |      |       |       |          |           |          |
|------------------|---------------|------|-------|-------|----------|-----------|----------|
| ENSG00000180573  | HIST1H2AC     | 0.58 | -1.71 | -0.77 | 2.99E-11 | -3.13E+05 | 3.13E+05 |
| ENSG00000143793  | C1orf35       | 0.57 | -1.74 | -0.80 | 3.13E-11 | -3.11E+05 | 3.11E+05 |
| ENSG00000137880  | GCHFR         | 2.01 | 2.01  | 1.01  | 4.19E-11 | 3.11E+05  | 3.11E+05 |
| ENSG00000116833  | NR5A2         | 0.61 | -1.64 | -0.71 | 2.95E-11 | -3.02E+05 | 3.02E+05 |
| ENSG00000165757  | KIAA1462      | 1.69 | 1.69  | 0.76  | 3.14E-11 | 3.01E+05  | 3.01E+05 |
| ENSG00000162511  | LAPTM5        | 1.63 | 1.63  | 0.70  | 2.92E-11 | 3.01E+05  | 3.01E+05 |
| ENSG00000254912  | RP11-632K20.2 | 2.54 | 2.54  | 1.35  | 7.25E-11 | 2.99E+05  | 2.99E+05 |
| ENSG00000145908  | ZNF300        | 0.59 | -1.69 | -0.76 | 3.29E-11 | -2.95E+05 | 2.95E+05 |
| ENSG00000153551  | CMTM7         | 1.64 | 1.64  | 0.72  | 3.14E-11 | 2.93E+05  | 2.93E+05 |
| ENSG00000259802  | CTD-2256P15.2 | 2.54 | 2.54  | 1.35  | 7.72E-11 | 2.89E+05  | 2.89E+05 |
| ENSG00000105556  | MIER2         | 1.67 | 1.67  | 0.74  | 3.39E-11 | 2.87E+05  | 2.87E+05 |
| ENSG00000144369  | FAM171B       | 0.53 | -1.88 | -0.91 | 4.30E-11 | -2.86E+05 | 2.86E+05 |
| ENSG00000183873  | SCN5A         | 1.78 | 1.78  | 0.83  | 3.88E-11 | 2.86E+05  | 2.86E+05 |
| ENSG00000220785  | MTMR9LP       | 0.49 | -2.05 | -1.03 | 5.16E-11 | -2.85E+05 | 2.85E+05 |
| ENSG00000136010  | ALDH1L2       | 0.43 | -2.34 | -1.22 | 6.77E-11 | -2.84E+05 | 2.84E+05 |
| ENSG00000130270  | ATP8B3        | 2.65 | 2.65  | 1.41  | 8.86E-11 | 2.82E+05  | 2.82E+05 |
| ENSG00000149257  | SERPINH1      | 0.58 | -1.72 | -0.79 | 3.76E-11 | -2.81E+05 | 2.81E+05 |
| ENSG00000226711  | FAM66C        | 2.51 | 2.51  | 1.33  | 7.94E-11 | 2.81E+05  | 2.81E+05 |
| ENSG000000081791 | KIAA0141      | 0.61 | -1.64 | -0.72 | 3.42E-11 | -2.81E+05 | 2.81E+05 |
| ENSG00000215788  | TNFRSF25      | 1.86 | 1.86  | 0.89  | 4.51E-11 | 2.77E+05  | 2.77E+05 |
| ENSG00000196586  | MYO6          | 1.69 | 1.69  | 0.76  | 3.75E-11 | 2.76E+05  | 2.76E+05 |
| ENSG00000146374  | RSPO3         | 0.31 | -3.18 | -1.67 | 1.35E-10 | -2.74E+05 | 2.74E+05 |
| ENSG00000176108  | CHMP6         | 0.58 | -1.73 | -0.79 | 4.04E-11 | -2.72E+05 | 2.72E+05 |
| ENSG00000113504  | SLC12A7       | 1.68 | 1.68  | 0.75  | 3.87E-11 | 2.71E+05  | 2.71E+05 |
| ENSG00000178802  | MPI           | 0.59 | -1.69 | -0.76 | 3.97E-11 | -2.68E+05 | 2.68E+05 |
| ENSG00000123159  | GIPC1         | 0.60 | -1.66 | -0.73 | 3.94E-11 | -2.64E+05 | 2.64E+05 |
| ENSG00000141959  | PFKL          | 0.57 | -1.77 | -0.82 | 4.50E-11 | -2.63E+05 | 2.63E+05 |
| ENSG00000120318  | ARAP3         | 1.88 | 1.88  | 0.91  | 5.13E-11 | 2.63E+05  | 2.63E+05 |
| ENSG00000213699  | C2orf18       | 0.60 | -1.66 | -0.73 | 4.04E-11 | -2.61E+05 | 2.61E+05 |
| ENSG000000085871 | MGST2         | 1.84 | 1.84  | 0.88  | 4.99E-11 | 2.60E+05  | 2.60E+05 |
| ENSG00000141429  | GALNT1        | 1.80 | 1.80  | 0.85  | 4.80E-11 | 2.60E+05  | 2.60E+05 |
| ENSG00000133119  | RFC3          | 0.61 | -1.64 | -0.71 | 4.00E-11 | -2.59E+05 | 2.59E+05 |
| ENSG00000099256  | PRTFDC1       | 0.60 | -1.66 | -0.73 | 4.22E-11 | -2.55E+05 | 2.55E+05 |
| ENSG00000161940  | BCL6B         | 1.68 | 1.68  | 0.75  | 4.34E-11 | 2.55E+05  | 2.55E+05 |
| ENSG00000164251  | F2RL1         | 1.70 | 1.70  | 0.77  | 4.52E-11 | 2.53E+05  | 2.53E+05 |
| ENSG000000012822 | CALCOCO1      | 1.65 | 1.65  | 0.72  | 4.27E-11 | 2.53E+05  | 2.53E+05 |
| ENSG00000132423  | COQ3          | 0.52 | -1.94 | -0.96 | 6.38E-11 | -2.43E+05 | 2.43E+05 |
| ENSG00000147403  | RPL10         | 0.57 | -1.76 | -0.82 | 5.35E-11 | -2.41E+05 | 2.41E+05 |
| ENSG00000204227  | RING1         | 0.54 | -1.85 | -0.89 | 6.00E-11 | -2.39E+05 | 2.39E+05 |
| ENSG00000109674  | NEIL3         | 0.55 | -1.82 | -0.86 | 5.87E-11 | -2.37E+05 | 2.37E+05 |
| ENSG000000008394 | MGST1         | 0.60 | -1.66 | -0.73 | 4.90E-11 | -2.37E+05 | 2.37E+05 |
| ENSG00000173914  | RBM4B         | 0.57 | -1.74 | -0.80 | 5.46E-11 | -2.36E+05 | 2.36E+05 |
| ENSG00000154767  | XPC           | 1.66 | 1.66  | 0.73  | 5.05E-11 | 2.34E+05  | 2.34E+05 |
| ENSG00000168291  | PDHB          | 0.61 | -1.65 | -0.72 | 5.10E-11 | -2.31E+05 | 2.31E+05 |
| ENSG00000119720  | NRDE2         | 0.59 | -1.69 | -0.76 | 5.56E-11 | -2.27E+05 | 2.27E+05 |
| ENSG00000104147  | OIP5          | 0.55 | -1.80 | -0.85 | 6.40E-11 | -2.25E+05 | 2.25E+05 |
| ENSG00000143341  | HMCN1         | 0.53 | -1.88 | -0.91 | 7.07E-11 | -2.24E+05 | 2.24E+05 |
| ENSG00000115295  | CLIP4         | 1.63 | 1.63  | 0.71  | 5.33E-11 | 2.23E+05  | 2.23E+05 |
| ENSG000000033627 | ATP6V0A1      | 1.71 | 1.71  | 0.77  | 5.89E-11 | 2.23E+05  | 2.23E+05 |
| ENSG00000171388  | APLN          | 1.69 | 1.69  | 0.75  | 5.77E-11 | 2.22E+05  | 2.22E+05 |
| ENSG00000164970  | FAM219A       | 1.64 | 1.64  | 0.71  | 5.53E-11 | 2.21E+05  | 2.21E+05 |
| ENSG00000090020  | SLC9A1        | 1.78 | 1.78  | 0.83  | 6.54E-11 | 2.21E+05  | 2.21E+05 |
| ENSG00000164283  | ESM1          | 1.73 | 1.73  | 0.79  | 6.23E-11 | 2.19E+05  | 2.19E+05 |
| ENSG00000134480  | CCNH          | 0.61 | -1.65 | -0.72 | 5.73E-11 | -2.18E+05 | 2.18E+05 |
| ENSG00000011478  | QPCTL         | 0.54 | -1.87 | -0.90 | 7.40E-11 | -2.17E+05 | 2.17E+05 |
| ENSG00000144063  | MALL          | 1.69 | 1.69  | 0.76  | 6.06E-11 | 2.17E+05  | 2.17E+05 |
| ENSG000000085840 | ORC1          | 0.56 | -1.77 | -0.82 | 6.68E-11 | -2.17E+05 | 2.17E+05 |
| ENSG00000112029  | FBXO5         | 0.62 | -1.63 | -0.70 | 5.69E-11 | -2.15E+05 | 2.15E+05 |
| ENSG00000183011  | NAA38         | 0.60 | -1.66 | -0.73 | 6.21E-11 | -2.11E+05 | 2.11E+05 |
| ENSG00000197557  | TTC30A        | 1.73 | 1.73  | 0.79  | 6.82E-11 | 2.09E+05  | 2.09E+05 |
| ENSG00000227354  | RBM26-AS1     | 2.61 | 2.61  | 1.38  | 1.56E-10 | 2.09E+05  | 2.09E+05 |
|                  | RP11-122A3.2  | 0.47 | -2.13 | -1.09 | 1.07E-10 | -2.06E+05 | 2.06E+05 |
| ENSG000000035664 | DAPK2         | 2.37 | 2.37  | 1.24  | 1.32E-10 | 2.06E+05  | 2.06E+05 |
| ENSG00000100479  | POLE2         | 0.59 | -1.70 | -0.77 | 6.88E-11 | -2.05E+05 | 2.05E+05 |
| ENSG00000100285  | NEFH          | 0.43 | -2.33 | -1.22 | 1.30E-10 | -2.05E+05 | 2.05E+05 |
| ENSG00000244005  | NFS1          | 0.60 | -1.68 | -0.75 | 6.77E-11 | -2.04E+05 | 2.04E+05 |
| ENSG00000115159  | GPD2          | 0.60 | -1.65 | -0.73 | 6.61E-11 | -2.03E+05 | 2.03E+05 |
| ENSG00000124006  | OBSL1         | 1.72 | 1.72  | 0.78  | 7.15E-11 | 2.03E+05  | 2.03E+05 |
| ENSG00000175115  | PACS1         | 0.54 | -1.84 | -0.88 | 8.55E-11 | -1.99E+05 | 1.99E+05 |
| ENSG00000176871  | WSB2          | 1.66 | 1.66  | 0.73  | 6.98E-11 | 1.98E+05  | 1.98E+05 |
| ENSG00000119138  | KLF9          | 0.56 | -1.79 | -0.84 | 8.26E-11 | -1.97E+05 | 1.97E+05 |
| ENSG00000162073  | PAQR4         | 0.58 | -1.72 | -0.78 | 7.90E-11 | -1.94E+05 | 1.94E+05 |
| ENSG00000104213  | PDGFRL        | 0.55 | -1.82 | -0.86 | 8.87E-11 | -1.93E+05 | 1.93E+05 |
| ENSG00000223745  | RP4-717I23.3  | 2.13 | 2.13  | 1.09  | 1.24E-10 | 1.91E+05  | 1.91E+05 |
| ENSG000000087086 | FTL           | 0.59 | -1.69 | -0.76 | 7.89E-11 | -1.91E+05 | 1.91E+05 |
| ENSG00000185010  | F8            | 2.27 | 2.27  | 1.19  | 1.43E-10 | 1.90E+05  | 1.90E+05 |
| ENSG00000204569  | PPP1R10       | 1.88 | 1.88  | 0.91  | 9.84E-11 | 1.89E+05  | 1.89E+05 |
| ENSG00000276045  | ORAI1         | 1.62 | 1.62  | 0.70  | 7.36E-11 | 1.89E+05  | 1.89E+05 |
| ENSG00000116017  | ARID3A        | 1.75 | 1.75  | 0.81  | 8.74E-11 | 1.88E+05  | 1.88E+05 |

|                 |               |      |       |       |          |           |          |
|-----------------|---------------|------|-------|-------|----------|-----------|----------|
| ENSG00000003402 | CFLAR         | 1.67 | 1.67  | 0.74  | 8.04E-11 | 1.86E+05  | 1.86E+05 |
| ENSG00000125378 | BMP4          | 0.60 | -1.66 | -0.73 | 7.99E-11 | -1.85E+05 | 1.85E+05 |
| ENSG00000154930 | ACSS1         | 1.83 | 1.83  | 0.88  | 9.83E-11 | 1.85E+05  | 1.85E+05 |
| ENSG00000170903 | MSANTD4       | 1.66 | 1.66  | 0.73  | 8.51E-11 | 1.80E+05  | 1.80E+05 |
| ENSG00000103415 | HMOX2         | 1.68 | 1.68  | 0.75  | 9.26E-11 | 1.75E+05  | 1.75E+05 |
| ENSG00000130005 | GAMT          | 0.54 | -1.85 | -0.89 | 1.16E-10 | -1.72E+05 | 1.72E+05 |
| ENSG00000254837 | AP001372.2    | 2.64 | 2.64  | 1.40  | 2.35E-10 | 1.72E+05  | 1.72E+05 |
| ENSG00000163975 | MF12          | 2.65 | 2.65  | 1.41  | 2.39E-10 | 1.71E+05  | 1.71E+05 |
| ENSG00000187609 | EXD3          | 1.74 | 1.74  | 0.80  | 1.06E-10 | 1.69E+05  | 1.69E+05 |
| ENSG00000167720 | SRR           | 1.67 | 1.67  | 0.74  | 9.99E-11 | 1.67E+05  | 1.67E+05 |
| ENSG00000116641 | DOCK7         | 1.79 | 1.79  | 0.84  | 1.17E-10 | 1.65E+05  | 1.65E+05 |
| ENSG00000161011 | SQSTM1        | 1.67 | 1.67  | 0.74  | 1.03E-10 | 1.65E+05  | 1.65E+05 |
|                 | RP11-169K16.9 | 1.98 | 1.98  | 0.98  | 1.46E-10 | 1.64E+05  | 1.64E+05 |
| ENSG00000245552 | RP11-712B9.2  | 3.16 | 3.16  | 1.66  | 3.73E-10 | 1.64E+05  | 1.64E+05 |
| ENSG00000131773 | KHDRBS3       | 1.69 | 1.69  | 0.75  | 1.07E-10 | 1.63E+05  | 1.63E+05 |
| ENSG00000137720 | C11orf1       | 1.82 | 1.82  | 0.87  | 1.25E-10 | 1.63E+05  | 1.63E+05 |
| ENSG00000123485 | HJURP         | 0.59 | -1.68 | -0.75 | 1.07E-10 | -1.63E+05 | 1.63E+05 |
| ENSG00000008324 | SS18L2        | 0.60 | -1.67 | -0.74 | 1.06E-10 | -1.62E+05 | 1.62E+05 |
| ENSG00000234810 | RP11-466L17.1 | 2.47 | 2.47  | 1.31  | 2.36E-10 | 1.61E+05  | 1.61E+05 |
| ENSG00000092931 | MFSD11        | 1.65 | 1.65  | 0.72  | 1.07E-10 | 1.60E+05  | 1.60E+05 |
| ENSG00000270154 | AC130352.1    | 1.93 | 1.93  | 0.95  | 1.48E-10 | 1.59E+05  | 1.59E+05 |
| ENSG00000196151 | WDSUB1        | 0.53 | -1.90 | -0.93 | 1.44E-10 | -1.58E+05 | 1.58E+05 |
| ENSG00000064225 | ST3GAL6       | 1.68 | 1.68  | 0.75  | 1.13E-10 | 1.58E+05  | 1.58E+05 |
| ENSG00000177628 | GBA           | 1.63 | 1.63  | 0.70  | 1.10E-10 | 1.55E+05  | 1.55E+05 |
|                 | RP4-668G5.1   | 2.37 | 2.37  | 1.25  | 2.34E-10 | 1.55E+05  | 1.55E+05 |
| ENSG00000076356 | PLXNA2        | 2.00 | 2.00  | 1.00  | 1.74E-10 | 1.52E+05  | 1.52E+05 |
| ENSG00000079739 | PGM1          | 0.58 | -1.72 | -0.78 | 1.29E-10 | -1.51E+05 | 1.51E+05 |
| ENSG00000142552 | RCN3          | 0.57 | -1.76 | -0.82 | 1.36E-10 | -1.51E+05 | 1.51E+05 |
| ENSG00000268006 | PTOV1-AS1     | 3.00 | 3.00  | 1.58  | 3.99E-10 | 1.50E+05  | 1.50E+05 |
| ENSG00000231185 | AC005592.2    | 2.63 | 2.63  | 1.39  | 3.07E-10 | 1.50E+05  | 1.50E+05 |
| ENSG00000111247 | RAD51AP1      | 0.59 | -1.69 | -0.76 | 1.28E-10 | -1.49E+05 | 1.49E+05 |
| ENSG00000085999 | RAD54L        | 0.52 | -1.93 | -0.95 | 1.69E-10 | -1.48E+05 | 1.48E+05 |
| ENSG00000089154 | GCN1L1        | 0.58 | -1.74 | -0.80 | 1.37E-10 | -1.48E+05 | 1.48E+05 |
| ENSG00000108828 | VAT1          | 1.67 | 1.67  | 0.74  | 1.27E-10 | 1.48E+05  | 1.48E+05 |
| ENSG00000178999 | AURKB         | 0.56 | -1.79 | -0.84 | 1.47E-10 | -1.47E+05 | 1.47E+05 |
| ENSG00000128512 | DOCK4         | 1.71 | 1.71  | 0.77  | 1.34E-10 | 1.47E+05  | 1.47E+05 |
| ENSG00000256087 | ZNF432        | 1.80 | 1.80  | 0.84  | 1.50E-10 | 1.46E+05  | 1.46E+05 |
| ENSG00000168496 | FEN1          | 0.61 | -1.63 | -0.71 | 1.25E-10 | -1.46E+05 | 1.46E+05 |
| ENSG00000101017 | CD40          | 1.70 | 1.70  | 0.76  | 1.43E-10 | 1.42E+05  | 1.42E+05 |
| ENSG00000125454 | SLC25A19      | 0.57 | -1.76 | -0.81 | 1.54E-10 | -1.41E+05 | 1.41E+05 |
| ENSG00000231770 | TMEM44-AS1    | 2.62 | 2.62  | 1.39  | 3.49E-10 | 1.40E+05  | 1.40E+05 |
| ENSG00000188493 | C19orf54      | 2.61 | 2.61  | 1.38  | 3.51E-10 | 1.39E+05  | 1.39E+05 |
| ENSG00000136319 | TTC5          | 0.58 | -1.72 | -0.78 | 1.54E-10 | -1.38E+05 | 1.38E+05 |
| ENSG00000140044 | JDP2          | 0.36 | -2.76 | -1.46 | 4.01E-10 | -1.38E+05 | 1.38E+05 |
| ENSG00000110427 | KIAA1549L     | 0.56 | -1.79 | -0.84 | 1.70E-10 | -1.37E+05 | 1.37E+05 |
| ENSG00000224870 | RP4-758J18.2  | 0.52 | -1.91 | -0.93 | 1.93E-10 | -1.37E+05 | 1.37E+05 |
| ENSG00000184988 | TMEM106A      | 0.52 | -1.93 | -0.95 | 1.99E-10 | -1.37E+05 | 1.37E+05 |
| ENSG00000130307 | USHBP1        | 1.85 | 1.85  | 0.89  | 1.87E-10 | 1.35E+05  | 1.35E+05 |
| ENSG00000125885 | MCM8          | 0.61 | -1.63 | -0.71 | 1.50E-10 | -1.33E+05 | 1.33E+05 |
| ENSG00000225511 | LINC00475     | 2.35 | 2.35  | 1.23  | 3.12E-10 | 1.33E+05  | 1.33E+05 |
| ENSG00000157693 | C9orf91       | 0.50 | -2.01 | -1.01 | 2.32E-10 | -1.32E+05 | 1.32E+05 |
| ENSG00000215421 | ZNF407        | 1.62 | 1.62  | 0.70  | 1.50E-10 | 1.32E+05  | 1.32E+05 |
| ENSG00000197417 | SHPK          | 0.62 | -1.60 | -0.68 | 1.48E-10 | -1.32E+05 | 1.32E+05 |
| ENSG00000033867 | SLC4A7        | 1.73 | 1.73  | 0.79  | 1.76E-10 | 1.31E+05  | 1.31E+05 |
| ENSG00000132475 | H3F3B         | 0.60 | -1.67 | -0.74 | 1.65E-10 | -1.30E+05 | 1.30E+05 |
| ENSG00000170464 | DNAJC18       | 1.72 | 1.72  | 0.78  | 1.74E-10 | 1.30E+05  | 1.30E+05 |
| ENSG00000171130 | ATP6V0E2      | 0.61 | -1.64 | -0.72 | 1.67E-10 | -1.27E+05 | 1.27E+05 |
| ENSG00000124120 | TPPAL         | 0.58 | -1.72 | -0.78 | 1.82E-10 | -1.27E+05 | 1.27E+05 |
| ENSG00000129657 | SEC14L1       | 1.66 | 1.66  | 0.73  | 1.71E-10 | 1.27E+05  | 1.27E+05 |
| ENSG00000145331 | TRMT10A       | 1.86 | 1.86  | 0.90  | 2.17E-10 | 1.26E+05  | 1.26E+05 |
| ENSG00000223501 | VPS52         | 0.60 | -1.67 | -0.74 | 1.76E-10 | -1.26E+05 | 1.26E+05 |
| ENSG00000231205 | ZNF826P       | 0.47 | -2.15 | -1.10 | 2.94E-10 | -1.25E+05 | 1.25E+05 |
| ENSG00000159363 | ATP13A2       | 1.77 | 1.77  | 0.83  | 2.03E-10 | 1.25E+05  | 1.25E+05 |
| ENSG00000109103 | UNC119        | 0.62 | -1.61 | -0.69 | 1.70E-10 | -1.24E+05 | 1.24E+05 |
| ENSG00000122912 | SLC25A16      | 0.57 | -1.74 | -0.80 | 2.01E-10 | -1.23E+05 | 1.23E+05 |
| ENSG00000157036 | EXOG          | 0.57 | -1.77 | -0.82 | 2.06E-10 | -1.23E+05 | 1.23E+05 |
| ENSG00000131061 | ZNF341        | 2.56 | 2.56  | 1.35  | 4.37E-10 | 1.22E+05  | 1.22E+05 |
| ENSG00000093009 | CDC45         | 0.60 | -1.66 | -0.73 | 1.86E-10 | -1.22E+05 | 1.22E+05 |
| ENSG00000164109 | MAD2L1        | 0.62 | -1.62 | -0.70 | 1.83E-10 | -1.20E+05 | 1.20E+05 |
| ENSG00000158715 | SLC45A3       | 1.66 | 1.66  | 0.73  | 1.95E-10 | 1.19E+05  | 1.19E+05 |
| ENSG00000182095 | TNRC18        | 1.63 | 1.63  | 0.70  | 1.88E-10 | 1.19E+05  | 1.19E+05 |
| ENSG00000276170 | AC124789.1    | 2.25 | 2.25  | 1.17  | 3.68E-10 | 1.17E+05  | 1.17E+05 |
| ENSG00000129173 | E2F8          | 0.60 | -1.67 | -0.74 | 2.03E-10 | -1.17E+05 | 1.17E+05 |
| ENSG00000170681 | MURC          | 2.07 | 2.07  | 1.05  | 3.19E-10 | 1.16E+05  | 1.16E+05 |
| ENSG00000131187 | F12           | 2.40 | 2.40  | 1.26  | 4.29E-10 | 1.16E+05  | 1.16E+05 |
| ENSG00000034677 | RNF19A        | 1.77 | 1.77  | 0.82  | 2.37E-10 | 1.15E+05  | 1.15E+05 |
| ENSG00000197713 | RPE           | 0.62 | -1.62 | -0.69 | 1.99E-10 | -1.15E+05 | 1.15E+05 |
| ENSG00000162852 | CNST          | 1.64 | 1.64  | 0.71  | 2.05E-10 | 1.14E+05  | 1.14E+05 |
| ENSG00000123572 | NRK           | 0.50 | -1.98 | -0.99 | 3.02E-10 | -1.14E+05 | 1.14E+05 |

|                 |                |      |       |       |          |           |          |
|-----------------|----------------|------|-------|-------|----------|-----------|----------|
| ENSG00000154188 | ANGPT1         | 0.44 | -2.29 | -1.20 | 4.08E-10 | -1.13E+05 | 1.13E+05 |
| ENSG00000154127 | UBASH3B        | 0.60 | -1.68 | -0.75 | 2.24E-10 | -1.12E+05 | 1.12E+05 |
| ENSG00000005302 | MSL3           | 1.61 | 1.61  | 0.69  | 2.13E-10 | 1.11E+05  | 1.11E+05 |
| ENSG00000174738 | NR1D2          | 1.62 | 1.62  | 0.69  | 2.19E-10 | 1.09E+05  | 1.09E+05 |
| ENSG00000234912 | LINC00338      | 0.55 | -1.82 | -0.87 | 2.79E-10 | -1.09E+05 | 1.09E+05 |
| ENSG00000141378 | PTRH2          | 0.62 | -1.60 | -0.68 | 2.18E-10 | -1.09E+05 | 1.09E+05 |
| ENSG00000160352 | ZNF714         | 0.63 | -1.59 | -0.67 | 2.17E-10 | -1.08E+05 | 1.08E+05 |
| ENSG00000120071 | KANSL1         | 1.60 | 1.60  | 0.68  | 2.22E-10 | 1.08E+05  | 1.08E+05 |
| ENSG00000085721 | RRN3           | 0.62 | -1.61 | -0.69 | 2.30E-10 | -1.06E+05 | 1.06E+05 |
| ENSG00000161395 | PGAP3          | 0.46 | -2.17 | -1.12 | 4.19E-10 | -1.06E+05 | 1.06E+05 |
| ENSG00000250571 | GLI4           | 2.03 | 2.03  | 1.02  | 3.68E-10 | 1.06E+05  | 1.06E+05 |
| ENSG00000158042 | MRPL17         | 0.60 | -1.66 | -0.73 | 2.66E-10 | -1.01E+05 | 1.01E+05 |
| ENSG00000108733 | PEX12          | 1.72 | 1.72  | 0.78  | 3.00E-10 | 9.90E+04  | 9.90E+04 |
| ENSG00000158710 | TAGLN2         | 1.65 | 1.65  | 0.72  | 2.85E-10 | 9.76E+04  | 9.76E+04 |
| ENSG00000135905 | DOCK10         | 2.02 | 2.02  | 1.02  | 4.34E-10 | 9.71E+04  | 9.71E+04 |
| ENSG00000090263 | MRPS33         | 0.62 | -1.63 | -0.70 | 2.83E-10 | -9.66E+04 | 9.66E+04 |
| ENSG00000124733 | MEA1           | 0.61 | -1.64 | -0.71 | 2.87E-10 | -9.66E+04 | 9.66E+04 |
| ENSG00000154917 | RAB6B          | 0.49 | -2.04 | -1.03 | 4.49E-10 | -9.62E+04 | 9.62E+04 |
| ENSG00000126821 | SGPP1          | 1.61 | 1.61  | 0.69  | 2.82E-10 | 9.59E+04  | 9.59E+04 |
| ENSG00000108187 | PBLD           | 1.83 | 1.83  | 0.87  | 3.69E-10 | 9.51E+04  | 9.51E+04 |
| ENSG00000162654 | GBP4           | 0.51 | -1.97 | -0.98 | 4.33E-10 | -9.45E+04 | 9.45E+04 |
| ENSG00000198853 | RUSC2          | 1.61 | 1.61  | 0.69  | 2.94E-10 | 9.40E+04  | 9.40E+04 |
| ENSG00000232098 | CTD-2619J13.14 | 2.62 | 2.62  | 1.39  | 7.84E-10 | 9.34E+04  | 9.34E+04 |
| ENSG00000166825 | ANPEP          | 2.06 | 2.06  | 1.04  | 4.86E-10 | 9.34E+04  | 9.34E+04 |
| ENSG00000179085 | DPM3           | 0.52 | -1.92 | -0.94 | 4.22E-10 | -9.33E+04 | 9.33E+04 |
| ENSG00000260879 | RP11-483I13.5  | 3.32 | 3.32  | 1.73  | 1.30E-09 | 9.22E+04  | 9.22E+04 |
| ENSG00000165959 | CLMN           | 1.74 | 1.74  | 0.80  | 3.57E-10 | 9.20E+04  | 9.20E+04 |
| ENSG00000249992 | TMEM158        | 2.02 | 2.02  | 1.01  | 4.81E-10 | 9.20E+04  | 9.20E+04 |
| ENSG00000138835 | RGS3           | 1.65 | 1.65  | 0.72  | 3.31E-10 | 9.06E+04  | 9.06E+04 |
| ENSG00000104231 | ZFAND1         | 0.60 | -1.68 | -0.74 | 3.48E-10 | -8.98E+04 | 8.98E+04 |
| ENSG00000242622 | RP11-18H7.1    | 2.38 | 2.38  | 1.25  | 7.07E-10 | 8.97E+04  | 8.97E+04 |
|                 | RP5-874C20.3   | 0.61 | -1.64 | -0.71 | 3.38E-10 | -8.92E+04 | 8.92E+04 |
| ENSG00000140575 | IQGAP1         | 1.83 | 1.83  | 0.87  | 4.22E-10 | 8.89E+04  | 8.89E+04 |
| ENSG00000178057 | NDUFAF3        | 0.63 | -1.60 | -0.68 | 3.24E-10 | -8.88E+04 | 8.88E+04 |
| ENSG00000117399 | CDC20          | 0.53 | -1.87 | -0.90 | 4.48E-10 | -8.84E+04 | 8.84E+04 |
| ENSG00000164649 | CDCA7L         | 0.60 | -1.65 | -0.73 | 3.53E-10 | -8.80E+04 | 8.80E+04 |
| ENSG00000184162 | NR2C2AP        | 0.57 | -1.77 | -0.82 | 4.12E-10 | -8.69E+04 | 8.69E+04 |
| ENSG00000228998 | RP11-697E2.7   | 1.69 | 1.69  | 0.76  | 3.80E-10 | 8.67E+04  | 8.67E+04 |
| ENSG00000106123 | EPHB6          | 0.47 | -2.13 | -1.09 | 6.10E-10 | -8.63E+04 | 8.63E+04 |
| ENSG00000274267 | HIST1H3B       | 0.60 | -1.66 | -0.74 | 3.73E-10 | -8.62E+04 | 8.62E+04 |
| ENSG00000148399 | WDR85          | 0.62 | -1.61 | -0.69 | 3.50E-10 | -8.60E+04 | 8.60E+04 |
| ENSG00000225216 | AC007362.1     | 0.57 | -1.77 | -0.82 | 4.25E-10 | -8.57E+04 | 8.57E+04 |
| ENSG00000100422 | CERK           | 1.64 | 1.64  | 0.72  | 3.76E-10 | 8.49E+04  | 8.49E+04 |
| ENSG00000108064 | TFAM           | 0.61 | -1.64 | -0.71 | 3.74E-10 | -8.48E+04 | 8.48E+04 |
| ENSG00000076248 | UNG            | 0.63 | -1.60 | -0.68 | 3.57E-10 | -8.46E+04 | 8.46E+04 |
|                 | AL033532.1     | 1.66 | 1.66  | 0.74  | 3.88E-10 | 8.45E+04  | 8.45E+04 |
| ENSG00000135926 | TMBIM1         | 1.72 | 1.72  | 0.79  | 4.19E-10 | 8.42E+04  | 8.42E+04 |
| ENSG00000100726 | TELO2          | 0.59 | -1.70 | -0.76 | 4.12E-10 | -8.36E+04 | 8.36E+04 |
| ENSG00000164414 | SLC35A1        | 0.59 | -1.69 | -0.76 | 4.12E-10 | -8.33E+04 | 8.33E+04 |
| ENSG00000149591 | TAGLN          | 1.85 | 1.85  | 0.89  | 5.00E-10 | 8.26E+04  | 8.26E+04 |
| ENSG00000181938 | GINS3          | 0.61 | -1.65 | -0.72 | 4.09E-10 | -8.15E+04 | 8.15E+04 |
| ENSG00000123154 | WDR83          | 0.55 | -1.83 | -0.88 | 5.08E-10 | -8.14E+04 | 8.14E+04 |
| ENSG00000073910 | FRY            | 1.65 | 1.65  | 0.72  | 4.15E-10 | 8.09E+04  | 8.09E+04 |
| ENSG00000118971 | CCND2          | 1.77 | 1.77  | 0.83  | 4.80E-10 | 8.09E+04  | 8.09E+04 |
| ENSG00000245498 | RP11-677M14.7  | 2.27 | 2.27  | 1.19  | 8.13E-10 | 7.98E+04  | 7.98E+04 |
| ENSG00000105976 | MET            | 1.67 | 1.67  | 0.74  | 4.40E-10 | 7.96E+04  | 7.96E+04 |
| ENSG00000212769 | HMGNP2P8       | 0.48 | -2.08 | -1.05 | 6.86E-10 | -7.93E+04 | 7.93E+04 |
| ENSG00000147065 | MSN            | 1.71 | 1.71  | 0.77  | 4.89E-10 | 7.71E+04  | 7.71E+04 |
| ENSG00000080546 | SESN1          | 1.64 | 1.64  | 0.72  | 4.57E-10 | 7.69E+04  | 7.69E+04 |
| ENSG00000083290 | ULK2           | 1.60 | 1.60  | 0.68  | 4.38E-10 | 7.63E+04  | 7.63E+04 |
| ENSG00000197008 | ZNF138         | 0.54 | -1.85 | -0.89 | 5.91E-10 | -7.62E+04 | 7.62E+04 |
| ENSG00000086200 | IPO11          | 1.65 | 1.65  | 0.73  | 4.70E-10 | 7.62E+04  | 7.62E+04 |
| ENSG00000121797 | CCRL2          | 1.83 | 1.83  | 0.87  | 5.84E-10 | 7.56E+04  | 7.56E+04 |
| ENSG00000132906 | CASP9          | 1.86 | 1.86  | 0.89  | 6.14E-10 | 7.49E+04  | 7.49E+04 |
| ENSG00000106305 | AIMP2          | 0.63 | -1.59 | -0.67 | 4.66E-10 | -7.35E+04 | 7.35E+04 |
| ENSG00000142871 | CYR61          | 0.56 | -1.78 | -0.83 | 5.86E-10 | -7.35E+04 | 7.35E+04 |
| ENSG00000182240 | BACE2          | 1.62 | 1.62  | 0.69  | 4.92E-10 | 7.30E+04  | 7.30E+04 |
| ENSG00000149054 | ZNF215         | 0.54 | -1.86 | -0.90 | 6.56E-10 | -7.27E+04 | 7.27E+04 |
| ENSG00000125630 | POLR1B         | 0.63 | -1.60 | -0.67 | 5.10E-10 | -7.07E+04 | 7.07E+04 |
| ENSG00000166833 | NAV2           | 1.79 | 1.79  | 0.84  | 6.42E-10 | 7.06E+04  | 7.06E+04 |
| ENSG00000176896 | TCEANC         | 2.28 | 2.28  | 1.19  | 1.05E-09 | 7.02E+04  | 7.02E+04 |
| ENSG00000077152 | UBE2T          | 0.62 | -1.62 | -0.69 | 5.39E-10 | -6.97E+04 | 6.97E+04 |
| ENSG00000102030 | NAA10          | 0.60 | -1.67 | -0.74 | 5.77E-10 | -6.97E+04 | 6.97E+04 |
| ENSG00000152229 | PSTPIP2        | 0.54 | -1.86 | -0.89 | 7.24E-10 | -6.90E+04 | 6.90E+04 |
| ENSG00000162434 | JAK1           | 1.64 | 1.64  | 0.71  | 5.70E-10 | 6.86E+04  | 6.86E+04 |
| ENSG00000140443 | IGF1R          | 1.83 | 1.83  | 0.87  | 7.30E-10 | 6.78E+04  | 6.78E+04 |
| ENSG00000101846 | STS            | 1.66 | 1.66  | 0.73  | 6.01E-10 | 6.77E+04  | 6.77E+04 |
| ENSG00000128284 | APOL3          | 0.62 | -1.60 | -0.68 | 5.62E-10 | -6.76E+04 | 6.76E+04 |
| ENSG00000198252 | STYX           | 0.61 | -1.63 | -0.71 | 5.97E-10 | -6.69E+04 | 6.69E+04 |

|                 |             |      |       |       |          |           |          |
|-----------------|-------------|------|-------|-------|----------|-----------|----------|
| ENSG00000067113 | PPAP2A      | 0.59 | -1.69 | -0.76 | 6.52E-10 | -6.62E+04 | 6.62E+04 |
| ENSG00000247077 | PGAM5       | 0.63 | -1.58 | -0.66 | 5.75E-10 | -6.58E+04 | 6.58E+04 |
| ENSG00000143543 | JTB         | 0.61 | -1.65 | -0.72 | 6.29E-10 | -6.57E+04 | 6.57E+04 |
| ENSG00000134690 | CDC48       | 0.60 | -1.67 | -0.74 | 6.65E-10 | -6.47E+04 | 6.47E+04 |
| ENSG00000085831 | TTC39A      | 0.37 | -2.70 | -1.43 | 1.75E-09 | -6.47E+04 | 6.47E+04 |
| ENSG00000167617 | CDC42EP5    | 1.63 | 1.63  | 0.70  | 6.42E-10 | 6.42E+04  | 6.42E+04 |
| ENSG00000145604 | SKP2        | 0.61 | -1.64 | -0.71 | 6.59E-10 | -6.39E+04 | 6.39E+04 |
| ENSG00000203760 | CENPW       | 0.62 | -1.62 | -0.69 | 6.51E-10 | -6.33E+04 | 6.33E+04 |
| ENSG00000159348 | CYB5R1      | 0.63 | -1.60 | -0.68 | 6.42E-10 | -6.31E+04 | 6.31E+04 |
| ENSG00000173705 | SUSD5       | 1.72 | 1.72  | 0.78  | 7.51E-10 | 6.26E+04  | 6.26E+04 |
| ENSG00000135740 | SLC9A5      | 2.02 | 2.02  | 1.01  | 1.08E-09 | 6.16E+04  | 6.16E+04 |
| ENSG00000173535 | TNFRSF10C   | 1.59 | 1.59  | 0.67  | 6.64E-10 | 6.15E+04  | 6.15E+04 |
| ENSG00000149218 | ENDOD1      | 0.63 | -1.60 | -0.68 | 6.79E-10 | -6.14E+04 | 6.14E+04 |
| ENSG00000108061 | SHOC2       | 1.74 | 1.74  | 0.80  | 8.33E-10 | 6.04E+04  | 6.04E+04 |
| ENSG00000197646 | PDCD1LG2    | 0.62 | -1.63 | -0.70 | 7.29E-10 | -6.02E+04 | 6.02E+04 |
| ENSG00000137474 | MYO7A       | 0.38 | -2.63 | -1.39 | 1.94E-09 | -5.96E+04 | 5.96E+04 |
| ENSG00000117461 | PIK3R3      | 1.58 | 1.58  | 0.66  | 7.02E-10 | 5.96E+04  | 5.96E+04 |
| ENSG00000161920 | MED11       | 0.60 | -1.66 | -0.73 | 7.79E-10 | -5.95E+04 | 5.95E+04 |
| ENSG00000137124 | ALDH1B1     | 0.64 | -1.57 | -0.65 | 6.96E-10 | -5.95E+04 | 5.95E+04 |
| ENSG00000147804 | SLC39A4     | 0.39 | -2.57 | -1.36 | 1.91E-09 | -5.87E+04 | 5.87E+04 |
| ENSG00000087088 | BAX         | 1.63 | 1.63  | 0.70  | 7.78E-10 | 5.84E+04  | 5.84E+04 |
| ENSG00000152818 | UTRN        | 2.01 | 2.01  | 1.01  | 1.19E-09 | 5.83E+04  | 5.83E+04 |
| ENSG00000111725 | PRKAB1      | 1.59 | 1.59  | 0.67  | 7.49E-10 | 5.81E+04  | 5.81E+04 |
| ENSG00000173482 | PTPRM       | 1.59 | 1.59  | 0.67  | 7.53E-10 | 5.80E+04  | 5.80E+04 |
| ENSG00000103227 | LMF1        | 1.94 | 1.94  | 0.96  | 1.13E-09 | 5.78E+04  | 5.78E+04 |
| ENSG00000071127 | WDR1        | 0.61 | -1.63 | -0.71 | 8.34E-10 | -5.65E+04 | 5.65E+04 |
| ENSG00000095713 | CRTAC1      | 1.95 | 1.95  | 0.96  | 1.20E-09 | 5.64E+04  | 5.64E+04 |
| ENSG00000172340 | SUCLG2      | 0.63 | -1.60 | -0.67 | 8.02E-10 | -5.63E+04 | 5.63E+04 |
| ENSG00000162384 | C1orf123    | 0.64 | -1.57 | -0.65 | 7.84E-10 | -5.62E+04 | 5.62E+04 |
| ENSG00000186105 | LRRC70      | 0.51 | -1.96 | -0.97 | 1.25E-09 | -5.56E+04 | 5.56E+04 |
| ENSG00000235770 | LINC00607   | 0.62 | -1.62 | -0.70 | 8.56E-10 | -5.54E+04 | 5.54E+04 |
| ENSG00000168297 | PXK         | 0.62 | -1.61 | -0.69 | 8.55E-10 | -5.52E+04 | 5.52E+04 |
| ENSG00000156011 | PSD3        | 1.58 | 1.58  | 0.66  | 8.21E-10 | 5.51E+04  | 5.51E+04 |
| ENSG00000249859 | PVT1        | 1.61 | 1.61  | 0.68  | 8.61E-10 | 5.48E+04  | 5.48E+04 |
| ENSG00000105607 | GCDH        | 0.61 | -1.64 | -0.72 | 9.01E-10 | -5.47E+04 | 5.47E+04 |
| ENSG00000127666 | TICAM1      | 1.81 | 1.81  | 0.85  | 1.11E-09 | 5.41E+04  | 5.41E+04 |
| ENSG00000148459 | PDSS1       | 0.60 | -1.67 | -0.74 | 9.58E-10 | -5.39E+04 | 5.39E+04 |
| ENSG00000130881 | LRP3        | 1.58 | 1.58  | 0.66  | 9.38E-10 | 5.16E+04  | 5.16E+04 |
| ENSG00000099864 | PALM        | 1.70 | 1.70  | 0.77  | 1.09E-09 | 5.15E+04  | 5.15E+04 |
| ENSG00000196782 | MAML3       | 1.64 | 1.64  | 0.72  | 1.02E-09 | 5.14E+04  | 5.14E+04 |
| ENSG00000104881 | PPP1R13L    | 1.93 | 1.93  | 0.95  | 1.41E-09 | 5.14E+04  | 5.14E+04 |
| ENSG00000072954 | TMEM38A     | 2.07 | 2.07  | 1.05  | 1.66E-09 | 5.08E+04  | 5.08E+04 |
| ENSG00000166508 | MCM7        | 0.61 | -1.65 | -0.72 | 1.06E-09 | -5.07E+04 | 5.07E+04 |
| ENSG00000102125 | TAZ         | 1.66 | 1.66  | 0.73  | 1.07E-09 | 5.06E+04  | 5.06E+04 |
| ENSG00000116062 | MSH6        | 0.60 | -1.67 | -0.74 | 1.09E-09 | -5.05E+04 | 5.05E+04 |
| ENSG00000126005 | MMP24-AS1   | 0.56 | -1.80 | -0.84 | 1.28E-09 | -5.03E+04 | 5.03E+04 |
| ENSG00000101361 | NOP56       | 0.61 | -1.63 | -0.71 | 1.06E-09 | -5.01E+04 | 5.01E+04 |
| ENSG00000164038 | SLC9B2      | 0.63 | -1.59 | -0.67 | 1.01E-09 | -5.01E+04 | 5.01E+04 |
| ENSG00000164171 | ITGA2       | 1.63 | 1.63  | 0.70  | 1.06E-09 | 4.99E+04  | 4.99E+04 |
| ENSG00000110031 | LPXN        | 1.60 | 1.60  | 0.68  | 1.03E-09 | 4.99E+04  | 4.99E+04 |
| ENSG00000187049 | TMEM216     | 0.57 | -1.74 | -0.80 | 1.22E-09 | -4.97E+04 | 4.97E+04 |
| ENSG00000101353 | C20orf132   | 2.41 | 2.41  | 1.27  | 2.36E-09 | 4.97E+04  | 4.97E+04 |
| ENSG00000151276 | MAGI1       | 1.62 | 1.62  | 0.70  | 1.08E-09 | 4.93E+04  | 4.93E+04 |
| ENSG00000119446 | RBM18       | 1.58 | 1.58  | 0.66  | 1.03E-09 | 4.91E+04  | 4.91E+04 |
| ENSG00000162688 | AGL         | 1.87 | 1.87  | 0.90  | 1.45E-09 | 4.90E+04  | 4.90E+04 |
| ENSG00000115363 | EVA1A       | 1.65 | 1.65  | 0.73  | 1.14E-09 | 4.89E+04  | 4.89E+04 |
| ENSG00000133101 | CCNA1       | 0.38 | -2.60 | -1.38 | 2.86E-09 | -4.86E+04 | 4.86E+04 |
| ENSG00000039523 | FAM65A      | 1.60 | 1.60  | 0.68  | 1.09E-09 | 4.85E+04  | 4.85E+04 |
| ENSG00000165097 | KDM1B       | 0.53 | -1.88 | -0.91 | 1.53E-09 | -4.80E+04 | 4.80E+04 |
| ENSG00000063660 | GPC1        | 1.73 | 1.73  | 0.79  | 1.30E-09 | 4.80E+04  | 4.80E+04 |
| ENSG00000124104 | SNX21       | 0.61 | -1.63 | -0.71 | 1.18E-09 | -4.76E+04 | 4.76E+04 |
| ENSG00000096093 | EFHC1       | 1.61 | 1.61  | 0.69  | 1.16E-09 | 4.73E+04  | 4.73E+04 |
| ENSG00000164985 | PSIP1       | 0.62 | -1.61 | -0.69 | 1.17E-09 | -4.72E+04 | 4.72E+04 |
| ENSG00000074416 | MGLL        | 1.72 | 1.72  | 0.79  | 1.34E-09 | 4.71E+04  | 4.71E+04 |
| ENSG00000241058 | NSUN6       | 1.68 | 1.68  | 0.75  | 1.28E-09 | 4.69E+04  | 4.69E+04 |
| ENSG00000144182 | LIPT1       | 0.52 | -1.93 | -0.95 | 1.70E-09 | -4.69E+04 | 4.69E+04 |
| ENSG00000219626 | FAM228B     | 1.87 | 1.87  | 0.90  | 1.60E-09 | 4.68E+04  | 4.68E+04 |
| ENSG00000119801 | YPEL5       | 1.65 | 1.65  | 0.72  | 1.24E-09 | 4.67E+04  | 4.67E+04 |
| ENSG00000251136 | RP11-37B2.1 | 1.80 | 1.80  | 0.85  | 1.52E-09 | 4.61E+04  | 4.61E+04 |
| ENSG00000196118 | C16orf93    | 0.41 | -2.45 | -1.29 | 2.83E-09 | -4.61E+04 | 4.61E+04 |
| ENSG00000197467 | COL13A1     | 0.63 | -1.59 | -0.67 | 1.20E-09 | -4.59E+04 | 4.59E+04 |
| ENSG00000103811 | CTSH        | 0.38 | -2.60 | -1.38 | 3.32E-09 | -4.52E+04 | 4.52E+04 |
| ENSG00000135679 | MDM2        | 1.63 | 1.63  | 0.71  | 1.33E-09 | 4.47E+04  | 4.47E+04 |
| ENSG00000145386 | CCNA2       | 0.60 | -1.67 | -0.74 | 1.40E-09 | -4.46E+04 | 4.46E+04 |
| ENSG00000159167 | STC1        | 2.45 | 2.45  | 1.29  | 3.04E-09 | 4.45E+04  | 4.45E+04 |
| ENSG00000234741 | GAS5        | 0.60 | -1.67 | -0.74 | 1.41E-09 | -4.44E+04 | 4.44E+04 |
| ENSG00000205544 | C17orf61    | 0.61 | -1.63 | -0.71 | 1.37E-09 | -4.41E+04 | 4.41E+04 |
| ENSG00000120256 | LRP11       | 1.58 | 1.58  | 0.66  | 1.30E-09 | 4.38E+04  | 4.38E+04 |
| ENSG00000157985 | AGAP1       | 1.61 | 1.61  | 0.69  | 1.36E-09 | 4.37E+04  | 4.37E+04 |

|                  |               |      |       |       |          |           |          |
|------------------|---------------|------|-------|-------|----------|-----------|----------|
| ENSG00000177106  | EPS8L2        | 2.26 | 2.26  | 1.18  | 2.69E-09 | 4.37E+04  | 4.37E+04 |
| ENSG00000176853  | FAM91A1       | 1.78 | 1.78  | 0.84  | 1.68E-09 | 4.36E+04  | 4.36E+04 |
| ENSG00000111602  | TIMELESS      | 0.64 | -1.56 | -0.64 | 1.30E-09 | -4.33E+04 | 4.33E+04 |
| ENSG00000165118  | C9orf64       | 1.59 | 1.59  | 0.67  | 1.34E-09 | 4.33E+04  | 4.33E+04 |
| ENSG00000205664  | RP11-706O15.1 | 1.62 | 1.62  | 0.70  | 1.43E-09 | 4.29E+04  | 4.29E+04 |
| ENSG00000116885  | OSCP1         | 0.53 | -1.88 | -0.91 | 1.97E-09 | -4.23E+04 | 4.23E+04 |
| ENSG00000181885  | CLDN7         | 0.56 | -1.77 | -0.83 | 1.81E-09 | -4.16E+04 | 4.16E+04 |
| ENSG00000169857  | AVEN          | 0.63 | -1.59 | -0.67 | 1.50E-09 | -4.10E+04 | 4.10E+04 |
| ENSG00000123975  | CKS2          | 0.62 | -1.61 | -0.69 | 1.56E-09 | -4.07E+04 | 4.07E+04 |
| ENSG00000169241  | SLC50A1       | 0.60 | -1.67 | -0.74 | 1.69E-09 | -4.05E+04 | 4.05E+04 |
| ENSG00000183010  | PYCR1         | 0.63 | -1.58 | -0.66 | 1.52E-09 | -4.05E+04 | 4.05E+04 |
| ENSG00000214293  | RSBN1L-AS1    | 0.43 | -2.30 | -1.20 | 3.25E-09 | -4.04E+04 | 4.04E+04 |
| ENSG00000138448  | ITGAV         | 1.61 | 1.61  | 0.69  | 1.60E-09 | 4.03E+04  | 4.03E+04 |
| ENSG00000152661  | GJA1          | 1.65 | 1.65  | 0.73  | 1.69E-09 | 4.03E+04  | 4.03E+04 |
| ENSG00000246523  | RP11-736K20.6 | 2.64 | 2.64  | 1.40  | 4.30E-09 | 4.02E+04  | 4.02E+04 |
| ENSG00000151692  | RNF144A       | 1.56 | 1.56  | 0.64  | 1.50E-09 | 4.01E+04  | 4.01E+04 |
| ENSG00000156313  | RPGR          | 0.57 | -1.76 | -0.81 | 1.95E-09 | -3.98E+04 | 3.98E+04 |
| ENSG00000233016  | SNHG7         | 0.64 | -1.56 | -0.64 | 1.59E-09 | -3.92E+04 | 3.92E+04 |
| ENSG00000156711  | MAPK13        | 0.52 | -1.92 | -0.94 | 2.46E-09 | -3.87E+04 | 3.87E+04 |
| ENSG00000244165  | P2RY11        | 2.38 | 2.38  | 1.25  | 3.80E-09 | 3.86E+04  | 3.86E+04 |
| ENSG00000038382  | TRIO          | 1.63 | 1.63  | 0.70  | 1.78E-09 | 3.85E+04  | 3.85E+04 |
| ENSG00000159314  | ARHGAP27      | 1.58 | 1.58  | 0.66  | 1.69E-09 | 3.84E+04  | 3.84E+04 |
| ENSG00000182372  | CLN8          | 1.58 | 1.58  | 0.66  | 1.71E-09 | 3.83E+04  | 3.83E+04 |
| ENSG00000234456  | MAGI2-AS3     | 0.62 | -1.62 | -0.69 | 1.81E-09 | -3.80E+04 | 3.80E+04 |
| ENSG00000124772  | CPNE5         | 1.73 | 1.73  | 0.79  | 2.12E-09 | 3.76E+04  | 3.76E+04 |
| ENSG00000003989  | SLC7A2        | 0.63 | -1.60 | -0.68 | 1.85E-09 | -3.71E+04 | 3.71E+04 |
|                  | AL353791.1    | 0.41 | -2.45 | -1.29 | 4.34E-09 | -3.71E+04 | 3.71E+04 |
| ENSG00000112679  | DUSP22        | 1.60 | 1.60  | 0.67  | 1.87E-09 | 3.69E+04  | 3.69E+04 |
| ENSG00000143507  | DUSP10        | 2.39 | 2.39  | 1.26  | 4.26E-09 | 3.67E+04  | 3.67E+04 |
| ENSG00000105676  | ARMC6         | 0.64 | -1.56 | -0.64 | 1.83E-09 | -3.66E+04 | 3.66E+04 |
| ENSG00000168827  | GFM1          | 1.74 | 1.74  | 0.80  | 2.27E-09 | 3.65E+04  | 3.65E+04 |
| ENSG00000245910  | SNHG6         | 0.57 | -1.76 | -0.82 | 2.36E-09 | -3.62E+04 | 3.62E+04 |
| ENSG00000152495  | CAMK4         | 0.43 | -2.34 | -1.23 | 4.33E-09 | -3.56E+04 | 3.56E+04 |
| ENSG00000058799  | YIPF1         | 1.59 | 1.59  | 0.67  | 2.00E-09 | 3.55E+04  | 3.55E+04 |
| ENSG00000183605  | SFXN4         | 0.60 | -1.67 | -0.74 | 2.27E-09 | -3.50E+04 | 3.50E+04 |
| ENSG00000105552  | BCAT2         | 0.62 | -1.62 | -0.69 | 2.15E-09 | -3.49E+04 | 3.49E+04 |
| ENSG00000122884  | P4HA1         | 0.61 | -1.64 | -0.71 | 2.22E-09 | -3.48E+04 | 3.48E+04 |
| ENSG00000130517  | PGPEP1        | 1.58 | 1.58  | 0.66  | 2.10E-09 | 3.45E+04  | 3.45E+04 |
| ENSG00000135842  | FAM129A       | 0.54 | -1.86 | -0.90 | 2.96E-09 | -3.43E+04 | 3.43E+04 |
| ENSG00000169248  | CXCL11        | 2.20 | 2.20  | 1.14  | 4.16E-09 | 3.41E+04  | 3.41E+04 |
| ENSG00000163686  | ABHD6         | 0.54 | -1.84 | -0.88 | 2.91E-09 | -3.41E+04 | 3.41E+04 |
|                  | RP11-66N24.4  | 2.27 | 2.27  | 1.18  | 4.47E-09 | 3.40E+04  | 3.40E+04 |
| ENSG00000174928  | C3orf33       | 0.48 | -2.08 | -1.06 | 3.77E-09 | -3.39E+04 | 3.39E+04 |
| ENSG00000230479  | AP000695.1    | 2.04 | 2.04  | 1.03  | 3.60E-09 | 3.39E+04  | 3.39E+04 |
| ENSG000000059122 | FLYWCH1       | 1.59 | 1.59  | 0.67  | 2.20E-09 | 3.39E+04  | 3.39E+04 |
| ENSG00000146112  | PPP1R18       | 1.65 | 1.65  | 0.72  | 2.38E-09 | 3.38E+04  | 3.38E+04 |
| ENSG000000088448 | ANKRD10       | 1.57 | 1.57  | 0.65  | 2.21E-09 | 3.34E+04  | 3.34E+04 |
| ENSG000000087157 | PGS1          | 1.57 | 1.57  | 0.65  | 2.27E-09 | 3.30E+04  | 3.30E+04 |
| ENSG00000171055  | FEZ2          | 1.62 | 1.62  | 0.70  | 2.43E-09 | 3.30E+04  | 3.30E+04 |
| ENSG00000002586  | CD99          | 1.61 | 1.61  | 0.68  | 2.38E-09 | 3.29E+04  | 3.29E+04 |
| ENSG00000140263  | SORD          | 0.62 | -1.61 | -0.69 | 2.43E-09 | -3.28E+04 | 3.28E+04 |
| ENSG00000000460  | C1orf112      | 0.64 | -1.57 | -0.65 | 2.31E-09 | -3.28E+04 | 3.28E+04 |
| ENSG000000095485 | CWF19L1       | 0.64 | -1.56 | -0.64 | 2.27E-09 | -3.27E+04 | 3.27E+04 |
| ENSG00000128944  | C15orf23      | 0.61 | -1.63 | -0.70 | 2.49E-09 | -3.27E+04 | 3.27E+04 |
| ENSG000000096092 | TMEM14A       | 0.62 | -1.60 | -0.68 | 2.43E-09 | -3.25E+04 | 3.25E+04 |
| ENSG00000269858  | EGLN2         | 0.63 | -1.58 | -0.66 | 2.38E-09 | -3.24E+04 | 3.24E+04 |
| ENSG00000112242  | E2F3          | 1.57 | 1.57  | 0.65  | 2.36E-09 | 3.23E+04  | 3.23E+04 |
| ENSG00000107263  | RAPGEF1       | 1.59 | 1.59  | 0.67  | 2.51E-09 | 3.18E+04  | 3.18E+04 |
| ENSG00000168028  | RPSA          | 0.62 | -1.62 | -0.69 | 2.61E-09 | -3.17E+04 | 3.17E+04 |
| ENSG000000072422 | RHOBTB1       | 1.60 | 1.60  | 0.68  | 2.60E-09 | 3.14E+04  | 3.14E+04 |
| ENSG00000108826  | MRPL27        | 0.63 | -1.57 | -0.66 | 2.53E-09 | -3.13E+04 | 3.13E+04 |
| ENSG00000116717  | GADD45A       | 1.57 | 1.57  | 0.65  | 2.54E-09 | 3.12E+04  | 3.12E+04 |
| ENSG00000135828  | RNASEL        | 1.81 | 1.81  | 0.86  | 3.52E-09 | 3.05E+04  | 3.05E+04 |
| ENSG000000073605 | GSDMB         | 1.80 | 1.80  | 0.85  | 3.50E-09 | 3.05E+04  | 3.05E+04 |
| ENSG00000107566  | ERLIN1        | 0.63 | -1.60 | -0.68 | 2.78E-09 | -3.03E+04 | 3.03E+04 |
| ENSG00000261840  | RP11-146F11.1 | 2.52 | 2.52  | 1.33  | 6.94E-09 | 3.02E+04  | 3.02E+04 |
| ENSG00000106004  | HOXA5         | 0.64 | -1.57 | -0.65 | 2.75E-09 | -2.99E+04 | 2.99E+04 |
| ENSG00000176597  | B3GNT5        | 1.89 | 1.89  | 0.92  | 4.01E-09 | 2.99E+04  | 2.99E+04 |
| ENSG00000119004  | CYP20A1       | 0.64 | -1.57 | -0.65 | 2.80E-09 | -2.97E+04 | 2.97E+04 |
| ENSG000000083799 | CYLD          | 1.57 | 1.57  | 0.65  | 2.81E-09 | 2.97E+04  | 2.97E+04 |
| ENSG00000174840  | PDE12         | 0.63 | -1.58 | -0.66 | 2.83E-09 | -2.96E+04 | 2.96E+04 |
| ENSG000000088682 | COQ9          | 0.64 | -1.57 | -0.65 | 2.84E-09 | -2.95E+04 | 2.95E+04 |
| ENSG00000136811  | ODF2          | 0.60 | -1.66 | -0.73 | 3.17E-09 | -2.95E+04 | 2.95E+04 |
| ENSG00000260912  | RP11-363E7.4  | 0.57 | -1.75 | -0.81 | 3.54E-09 | -2.95E+04 | 2.95E+04 |
| ENSG00000134910  | STT3A         | 0.62 | -1.60 | -0.68 | 2.97E-09 | -2.94E+04 | 2.94E+04 |
| ENSG000000071054 | MAP4K4        | 1.71 | 1.71  | 0.77  | 3.41E-09 | 2.92E+04  | 2.92E+04 |
| ENSG00000126767  | ELK1          | 0.62 | -1.60 | -0.68 | 3.05E-09 | -2.90E+04 | 2.90E+04 |
| ENSG00000184271  | POU6F1        | 1.75 | 1.75  | 0.81  | 3.65E-09 | 2.89E+04  | 2.89E+04 |
| ENSG00000260920  | RP1-228H13.5  | 2.42 | 2.42  | 1.28  | 7.07E-09 | 2.88E+04  | 2.88E+04 |

|                 |               |      |       |       |          |           |          |
|-----------------|---------------|------|-------|-------|----------|-----------|----------|
| ENSG00000261824 | LINC00662     | 1.65 | 1.65  | 0.72  | 3.31E-09 | 2.87E+04  | 2.87E+04 |
| ENSG00000048392 | RRM2B         | 1.77 | 1.77  | 0.83  | 3.84E-09 | 2.87E+04  | 2.87E+04 |
| ENSG00000198816 | ZNF358        | 1.57 | 1.57  | 0.65  | 3.01E-09 | 2.86E+04  | 2.86E+04 |
| ENSG00000087586 | AURKA         | 0.62 | -1.62 | -0.69 | 3.23E-09 | -2.85E+04 | 2.85E+04 |
| ENSG00000163900 | TMEM41A       | 0.64 | -1.57 | -0.65 | 3.03E-09 | -2.85E+04 | 2.85E+04 |
| ENSG00000133731 | IMP1A1        | 0.60 | -1.67 | -0.74 | 3.55E-09 | -2.80E+04 | 2.80E+04 |
| ENSG00000198369 | SPRED2        | 1.74 | 1.74  | 0.80  | 3.91E-09 | 2.78E+04  | 2.78E+04 |
| ENSG00000136231 | IGF2BP3       | 1.68 | 1.68  | 0.75  | 3.69E-09 | 2.76E+04  | 2.76E+04 |
| ENSG00000132394 | EEFSEC        | 0.50 | -2.01 | -1.01 | 5.30E-09 | -2.76E+04 | 2.76E+04 |
| ENSG00000182704 | TSKU          | 1.60 | 1.60  | 0.68  | 3.49E-09 | 2.71E+04  | 2.71E+04 |
|                 | RP11-395P17.3 | 2.27 | 2.27  | 1.18  | 7.06E-09 | 2.70E+04  | 2.70E+04 |
| ENSG00000163751 | CPA3          | 1.91 | 1.91  | 0.93  | 5.02E-09 | 2.69E+04  | 2.69E+04 |
| ENSG00000074582 | BCS1L         | 0.62 | -1.62 | -0.69 | 3.61E-09 | -2.69E+04 | 2.69E+04 |
| ENSG00000041880 | PARP3         | 1.67 | 1.67  | 0.74  | 3.87E-09 | 2.69E+04  | 2.69E+04 |
| ENSG00000128059 | PPAT          | 0.63 | -1.59 | -0.67 | 3.52E-09 | -2.68E+04 | 2.68E+04 |
| ENSG00000136717 | BIN1          | 1.61 | 1.61  | 0.69  | 3.62E-09 | 2.68E+04  | 2.68E+04 |
| ENSG00000182318 | ZSCAN22       | 1.75 | 1.75  | 0.81  | 4.34E-09 | 2.66E+04  | 2.66E+04 |
| ENSG00000111203 | ITFG2         | 0.59 | -1.68 | -0.75 | 4.05E-09 | -2.64E+04 | 2.64E+04 |
| ENSG00000185619 | PCGF3         | 1.58 | 1.58  | 0.66  | 3.62E-09 | 2.62E+04  | 2.62E+04 |
| ENSG00000051128 | HOMER3        | 1.57 | 1.57  | 0.65  | 3.58E-09 | 2.62E+04  | 2.62E+04 |
| ENSG00000177045 | SIX5          | 1.66 | 1.66  | 0.73  | 4.03E-09 | 2.62E+04  | 2.62E+04 |
| ENSG00000162819 | BROX          | 1.61 | 1.61  | 0.69  | 3.81E-09 | 2.61E+04  | 2.61E+04 |
| ENSG00000182378 | PLCXD1        | 0.57 | -1.77 | -0.82 | 4.66E-09 | -2.59E+04 | 2.59E+04 |
| ENSG00000197746 | PSAP          | 1.62 | 1.62  | 0.69  | 3.90E-09 | 2.59E+04  | 2.59E+04 |
| ENSG00000148154 | UGCG          | 1.61 | 1.61  | 0.68  | 3.88E-09 | 2.58E+04  | 2.58E+04 |
| ENSG00000154839 | SKA1          | 0.64 | -1.56 | -0.64 | 3.71E-09 | -2.56E+04 | 2.56E+04 |
| ENSG00000173065 | FAM222B       | 1.76 | 1.76  | 0.82  | 4.92E-09 | 2.51E+04  | 2.51E+04 |
| ENSG00000067177 | PHKA1         | 0.62 | -1.62 | -0.69 | 4.21E-09 | -2.49E+04 | 2.49E+04 |
| ENSG00000092421 | SEMA6A        | 0.39 | -2.59 | -1.37 | 1.09E-08 | -2.49E+04 | 2.49E+04 |
| ENSG00000180730 | SHISA2        | 1.82 | 1.82  | 0.86  | 5.38E-09 | 2.48E+04  | 2.48E+04 |
| ENSG00000087303 | NID2          | 2.46 | 2.46  | 1.30  | 9.81E-09 | 2.48E+04  | 2.48E+04 |
| ENSG00000075239 | ACAT1         | 0.64 | -1.57 | -0.65 | 4.08E-09 | -2.46E+04 | 2.46E+04 |
| ENSG00000148187 | MRRF          | 1.55 | 1.55  | 0.63  | 3.97E-09 | 2.45E+04  | 2.45E+04 |
| ENSG00000153774 | CFDP1         | 0.63 | -1.58 | -0.66 | 4.13E-09 | -2.45E+04 | 2.45E+04 |
| ENSG00000137337 | MDC1          | 1.74 | 1.74  | 0.80  | 5.06E-09 | 2.45E+04  | 2.45E+04 |
| ENSG00000120279 | MYCT1         | 1.61 | 1.61  | 0.68  | 4.30E-09 | 2.45E+04  | 2.45E+04 |
| ENSG00000146918 | NCAPG2        | 0.62 | -1.60 | -0.68 | 4.42E-09 | -2.41E+04 | 2.41E+04 |
| ENSG00000148803 | FUOM          | 0.56 | -1.79 | -0.84 | 5.63E-09 | -2.39E+04 | 2.39E+04 |
| ENSG00000196754 | S100A2        | 2.30 | 2.30  | 1.20  | 9.33E-09 | 2.38E+04  | 2.38E+04 |
| ENSG00000168309 | FAM107A       | 0.60 | -1.67 | -0.74 | 4.89E-09 | -2.38E+04 | 2.38E+04 |
| ENSG00000124019 | FAM124B       | 1.58 | 1.58  | 0.66  | 4.42E-09 | 2.38E+04  | 2.38E+04 |
| ENSG00000169093 | ASMTL         | 0.62 | -1.62 | -0.70 | 4.77E-09 | -2.35E+04 | 2.35E+04 |
| ENSG00000169083 | AR            | 0.62 | -1.61 | -0.68 | 4.76E-09 | -2.33E+04 | 2.33E+04 |
| ENSG00000130147 | SH3BP4        | 1.64 | 1.64  | 0.71  | 4.95E-09 | 2.33E+04  | 2.33E+04 |
| ENSG00000147475 | ERLIN2        | 1.58 | 1.58  | 0.66  | 4.63E-09 | 2.33E+04  | 2.33E+04 |
| ENSG00000196597 | ZNF782        | 1.75 | 1.75  | 0.81  | 5.69E-09 | 2.33E+04  | 2.33E+04 |
| ENSG00000034533 | ASTE1         | 0.59 | -1.68 | -0.75 | 5.30E-09 | -2.31E+04 | 2.31E+04 |
| ENSG00000124406 | ATP8A1        | 0.54 | -1.85 | -0.89 | 6.54E-09 | -2.29E+04 | 2.29E+04 |
|                 | AC106722.1    | 2.14 | 2.14  | 1.10  | 8.83E-09 | 2.28E+04  | 2.28E+04 |
| ENSG00000172586 | CHCHD1        | 0.62 | -1.61 | -0.69 | 5.08E-09 | -2.26E+04 | 2.26E+04 |
| ENSG00000073111 | MCM2          | 0.59 | -1.69 | -0.76 | 5.70E-09 | -2.24E+04 | 2.24E+04 |
| ENSG00000003096 | KLHL13        | 0.65 | -1.54 | -0.62 | 4.82E-09 | -2.22E+04 | 2.22E+04 |
| ENSG00000166548 | TK2           | 1.59 | 1.59  | 0.67  | 5.14E-09 | 2.21E+04  | 2.21E+04 |
| ENSG00000106829 | TLE4          | 1.56 | 1.56  | 0.64  | 4.96E-09 | 2.21E+04  | 2.21E+04 |
| ENSG00000100027 | YPEL1         | 0.48 | -2.09 | -1.07 | 8.97E-09 | -2.21E+04 | 2.21E+04 |
| ENSG00000198825 | INPP5F        | 1.61 | 1.61  | 0.68  | 5.67E-09 | 2.13E+04  | 2.13E+04 |
|                 | AC058791.2    | 1.82 | 1.82  | 0.86  | 7.36E-09 | 2.12E+04  | 2.12E+04 |
| ENSG00000168724 | DNAJC21       | 0.64 | -1.56 | -0.64 | 5.43E-09 | -2.11E+04 | 2.11E+04 |
| ENSG00000272412 | Metazoa_SRP   | 0.48 | -2.10 | -1.07 | 9.91E-09 | -2.11E+04 | 2.11E+04 |
| ENSG00000185483 | ROR1          | 1.63 | 1.63  | 0.71  | 6.03E-09 | 2.10E+04  | 2.10E+04 |
| ENSG00000198589 | LRBA          | 1.64 | 1.64  | 0.71  | 6.12E-09 | 2.09E+04  | 2.09E+04 |
| ENSG00000046651 | OFD1          | 1.56 | 1.56  | 0.64  | 5.68E-09 | 2.07E+04  | 2.07E+04 |
| ENSG00000143842 | SOX13         | 1.60 | 1.60  | 0.68  | 6.13E-09 | 2.05E+04  | 2.05E+04 |
| ENSG00000130717 | UCK1          | 0.63 | -1.58 | -0.66 | 6.02E-09 | -2.04E+04 | 2.04E+04 |
| ENSG00000163006 | CCDC138       | 0.59 | -1.69 | -0.76 | 6.94E-09 | -2.03E+04 | 2.03E+04 |
| ENSG00000135929 | CYP27A1       | 0.57 | -1.76 | -0.81 | 7.59E-09 | -2.02E+04 | 2.02E+04 |
| ENSG00000134698 | EIF2C4        | 1.54 | 1.54  | 0.62  | 5.81E-09 | 2.01E+04  | 2.01E+04 |
| ENSG00000108590 | MED31         | 0.63 | -1.59 | -0.67 | 6.29E-09 | -2.01E+04 | 2.01E+04 |
| ENSG00000071242 | RPS6KA2       | 1.58 | 1.58  | 0.66  | 6.18E-09 | 2.01E+04  | 2.01E+04 |
| ENSG00000158467 | AHCYL2        | 0.64 | -1.55 | -0.64 | 6.00E-09 | -2.01E+04 | 2.01E+04 |
| ENSG00000183161 | FANCF         | 1.56 | 1.56  | 0.64  | 6.14E-09 | 1.99E+04  | 1.99E+04 |
| ENSG00000157456 | CCNB2         | 0.63 | -1.58 | -0.66 | 6.54E-09 | -1.95E+04 | 1.95E+04 |
| ENSG00000137547 | MRPL15        | 1.94 | 1.94  | 0.96  | 1.00E-08 | 1.94E+04  | 1.94E+04 |
|                 | RP11-10017.2  | 1.90 | 1.90  | 0.93  | 9.71E-09 | 1.93E+04  | 1.93E+04 |
| ENSG00000119938 | PPP1R3C       | 0.49 | -2.03 | -1.02 | 1.13E-08 | -1.90E+04 | 1.90E+04 |
| ENSG00000170385 | SLC30A1       | 1.62 | 1.62  | 0.70  | 7.30E-09 | 1.90E+04  | 1.90E+04 |
| ENSG00000107882 | SUFU          | 1.62 | 1.62  | 0.70  | 7.44E-09 | 1.88E+04  | 1.88E+04 |
| ENSG00000257219 | RP11-54A9.1   | 1.58 | 1.58  | 0.66  | 7.07E-09 | 1.88E+04  | 1.88E+04 |
| ENSG00000157214 | STEAP2        | 0.51 | -1.95 | -0.97 | 1.09E-08 | -1.87E+04 | 1.87E+04 |

|                 |            |      |       |       |          |           |          |
|-----------------|------------|------|-------|-------|----------|-----------|----------|
| ENSG00000112406 | HECA       | 1.56 | 1.56  | 0.65  | 7.16E-09 | 1.85E+04  | 1.85E+04 |
| ENSG00000013297 | CLDN11     | 0.61 | -1.65 | -0.72 | 7.97E-09 | -1.84E+04 | 1.84E+04 |
| ENSG00000054282 | SDCCAG8    | 1.54 | 1.54  | 0.62  | 7.11E-09 | 1.82E+04  | 1.82E+04 |
| ENSG00000106443 | PHF14      | 1.58 | 1.58  | 0.66  | 7.50E-09 | 1.82E+04  | 1.82E+04 |
| ENSG00000164136 | IL15       | 0.50 | -1.98 | -0.99 | 1.26E-08 | -1.77E+04 | 1.77E+04 |
| ENSG00000151208 | DLG5       | 1.61 | 1.61  | 0.69  | 8.44E-09 | 1.75E+04  | 1.75E+04 |
| ENSG00000088305 | DNMT3B     | 0.62 | -1.61 | -0.69 | 8.49E-09 | -1.74E+04 | 1.74E+04 |
| ENSG00000116353 | MECR       | 0.61 | -1.63 | -0.71 | 8.85E-09 | -1.73E+04 | 1.73E+04 |
| ENSG00000170469 | SPATA24    | 0.44 | -2.30 | -1.20 | 1.75E-08 | -1.73E+04 | 1.73E+04 |
| ENSG00000168405 | CMAHP      | 0.43 | -2.31 | -1.21 | 1.79E-08 | -1.72E+04 | 1.72E+04 |
| ENSG00000102755 | FLT1       | 1.57 | 1.57  | 0.65  | 8.45E-09 | 1.71E+04  | 1.71E+04 |
| ENSG00000107554 | DNMBP      | 1.68 | 1.68  | 0.75  | 9.83E-09 | 1.70E+04  | 1.70E+04 |
| ENSG00000185737 | NRG3       | 0.37 | -2.73 | -1.45 | 2.63E-08 | -1.69E+04 | 1.69E+04 |
| ENSG00000115946 | PNO1       | 0.64 | -1.57 | -0.65 | 8.66E-09 | -1.68E+04 | 1.68E+04 |
| ENSG00000240771 | ARHGEF25   | 1.78 | 1.78  | 0.83  | 1.12E-08 | 1.68E+04  | 1.68E+04 |
| ENSG00000117676 | RPS6KA1    | 0.60 | -1.68 | -0.75 | 9.95E-09 | -1.68E+04 | 1.68E+04 |
| ENSG00000015532 | XYLT2      | 0.62 | -1.61 | -0.69 | 9.22E-09 | -1.68E+04 | 1.68E+04 |
| ENSG00000161204 | ABCY3      | 0.64 | -1.55 | -0.63 | 8.59E-09 | -1.67E+04 | 1.67E+04 |
| ENSG00000162441 | LZIC       | 1.54 | 1.54  | 0.62  | 8.56E-09 | 1.66E+04  | 1.66E+04 |
| ENSG00000263327 | TAPT1-AS1  | 2.22 | 2.22  | 1.15  | 1.80E-08 | 1.66E+04  | 1.66E+04 |
| ENSG00000101842 | VSIG1      | 1.75 | 1.75  | 0.80  | 1.14E-08 | 1.64E+04  | 1.64E+04 |
| ENSG00000120889 | TNFRSF10B  | 1.59 | 1.59  | 0.66  | 9.51E-09 | 1.63E+04  | 1.63E+04 |
| ENSG00000213923 | CSNK1E     | 1.57 | 1.57  | 0.65  | 9.33E-09 | 1.62E+04  | 1.62E+04 |
| ENSG00000115415 | STAT1      | 0.64 | -1.57 | -0.65 | 9.41E-09 | -1.62E+04 | 1.62E+04 |
| ENSG00000188153 | COL4A5     | 0.62 | -1.60 | -0.68 | 9.88E-09 | -1.61E+04 | 1.61E+04 |
| ENSG00000254901 | MEF2BNB    | 0.60 | -1.65 | -0.73 | 1.05E-08 | -1.61E+04 | 1.61E+04 |
| ENSG00000164167 | LSM6       | 0.64 | -1.56 | -0.64 | 9.48E-09 | -1.61E+04 | 1.61E+04 |
| ENSG00000117394 | SLC2A1     | 1.69 | 1.69  | 0.76  | 1.13E-08 | 1.59E+04  | 1.59E+04 |
| ENSG00000126368 | NR1D1      | 2.33 | 2.33  | 1.22  | 2.18E-08 | 1.57E+04  | 1.57E+04 |
| ENSG00000048162 | NOP16      | 0.65 | -1.54 | -0.62 | 9.73E-09 | -1.56E+04 | 1.56E+04 |
| ENSG00000167578 | RAB4B      | 0.54 | -1.86 | -0.90 | 1.43E-08 | -1.56E+04 | 1.56E+04 |
| ENSG00000120860 | CCDC53     | 1.54 | 1.54  | 0.62  | 1.01E-08 | 1.54E+04  | 1.54E+04 |
| ENSG00000198689 | SLC9A6     | 1.53 | 1.53  | 0.61  | 1.00E-08 | 1.53E+04  | 1.53E+04 |
| ENSG00000100221 | JOSD1      | 1.57 | 1.57  | 0.65  | 1.06E-08 | 1.53E+04  | 1.53E+04 |
| ENSG00000186480 | INSIG1     | 0.62 | -1.62 | -0.69 | 1.13E-08 | -1.52E+04 | 1.52E+04 |
| ENSG00000156603 | MED19      | 0.63 | -1.59 | -0.67 | 1.10E-08 | -1.51E+04 | 1.51E+04 |
| ENSG00000121900 | TMEM54     | 0.55 | -1.82 | -0.86 | 1.46E-08 | -1.51E+04 | 1.51E+04 |
| ENSG00000171791 | BCL2       | 1.98 | 1.98  | 0.98  | 1.74E-08 | 1.50E+04  | 1.50E+04 |
| ENSG00000130402 | ACTN4      | 1.64 | 1.64  | 0.72  | 1.23E-08 | 1.48E+04  | 1.48E+04 |
| ENSG00000074071 | MRPS34     | 0.65 | -1.53 | -0.61 | 1.07E-08 | -1.48E+04 | 1.48E+04 |
| ENSG00000107872 | FBXL15     | 0.58 | -1.72 | -0.78 | 1.36E-08 | -1.47E+04 | 1.47E+04 |
| ENSG00000274641 | HIST1H2BO  | 0.62 | -1.61 | -0.69 | 1.20E-08 | -1.47E+04 | 1.47E+04 |
| ENSG00000094975 | SUCO       | 1.64 | 1.64  | 0.71  | 1.25E-08 | 1.46E+04  | 1.46E+04 |
| ENSG00000078246 | TULP3      | 1.69 | 1.69  | 0.76  | 1.35E-08 | 1.46E+04  | 1.46E+04 |
| ENSG00000105559 | PLEKHA4    | 0.44 | -2.26 | -1.18 | 2.40E-08 | -1.46E+04 | 1.46E+04 |
| ENSG00000105767 | CADM4      | 1.76 | 1.76  | 0.82  | 1.47E-08 | 1.45E+04  | 1.45E+04 |
| ENSG00000075826 | SEC31B     | 2.06 | 2.06  | 1.04  | 2.01E-08 | 1.45E+04  | 1.45E+04 |
| ENSG00000142945 | KIF2C      | 0.63 | -1.59 | -0.67 | 1.22E-08 | -1.44E+04 | 1.44E+04 |
| ENSG00000188641 | DPYD       | 0.65 | -1.53 | -0.61 | 1.13E-08 | -1.44E+04 | 1.44E+04 |
| ENSG00000164442 | CITED2     | 0.60 | -1.68 | -0.75 | 1.36E-08 | -1.44E+04 | 1.44E+04 |
| ENSG00000124191 | TOX2       | 1.80 | 1.80  | 0.85  | 1.57E-08 | 1.43E+04  | 1.43E+04 |
| ENSG00000186470 | BTN3A2     | 0.65 | -1.55 | -0.63 | 1.16E-08 | -1.43E+04 | 1.43E+04 |
| ENSG00000142867 | BCL10      | 1.57 | 1.57  | 0.65  | 1.20E-08 | 1.43E+04  | 1.43E+04 |
| ENSG00000204351 | SKIV2L     | 0.61 | -1.64 | -0.71 | 1.34E-08 | -1.41E+04 | 1.41E+04 |
| ENSG00000170542 | SERPINB9   | 0.64 | -1.55 | -0.63 | 1.23E-08 | -1.40E+04 | 1.40E+04 |
| ENSG00000214263 | RPSAP53    | 0.61 | -1.64 | -0.72 | 1.42E-08 | -1.38E+04 | 1.38E+04 |
| ENSG00000230630 | DNM3OS     | 0.51 | -1.95 | -0.96 | 2.00E-08 | -1.38E+04 | 1.38E+04 |
| ENSG00000168310 | IRF2       | 1.65 | 1.65  | 0.72  | 1.43E-08 | 1.38E+04  | 1.38E+04 |
| ENSG00000164938 | TP53INP1   | 1.60 | 1.60  | 0.68  | 1.37E-08 | 1.37E+04  | 1.37E+04 |
| ENSG00000226137 | BAIAP2-AS1 | 0.63 | -1.60 | -0.68 | 1.37E-08 | -1.37E+04 | 1.37E+04 |
| ENSG00000257167 | TMPO-AS1   | 1.77 | 1.77  | 0.83  | 1.72E-08 | 1.35E+04  | 1.35E+04 |
| ENSG00000176102 | CSTF3      | 1.67 | 1.67  | 0.74  | 1.54E-08 | 1.35E+04  | 1.35E+04 |
| ENSG00000135317 | SNX14      | 0.64 | -1.56 | -0.64 | 1.34E-08 | -1.34E+04 | 1.34E+04 |
| ENSG00000182154 | MRPL41     | 0.66 | -1.52 | -0.61 | 1.29E-08 | -1.34E+04 | 1.34E+04 |
| ENSG00000196083 | IL1RAP     | 1.55 | 1.55  | 0.63  | 1.34E-08 | 1.34E+04  | 1.34E+04 |
| ENSG00000047346 | FAM214A    | 1.57 | 1.57  | 0.65  | 1.38E-08 | 1.34E+04  | 1.34E+04 |
| ENSG00000112144 | ICK        | 1.63 | 1.63  | 0.70  | 1.48E-08 | 1.34E+04  | 1.34E+04 |
| ENSG00000101608 | MYL12A     | 1.58 | 1.58  | 0.66  | 1.40E-08 | 1.33E+04  | 1.33E+04 |
| ENSG00000018189 | RUFY3      | 0.66 | -1.52 | -0.61 | 1.31E-08 | -1.33E+04 | 1.33E+04 |
| ENSG00000026508 | CD44       | 1.61 | 1.61  | 0.69  | 1.47E-08 | 1.33E+04  | 1.33E+04 |
| ENSG00000117448 | AKR1A1     | 0.64 | -1.55 | -0.63 | 1.38E-08 | -1.32E+04 | 1.32E+04 |
| ENSG00000104964 | AES        | 1.59 | 1.59  | 0.67  | 1.45E-08 | 1.32E+04  | 1.32E+04 |
| ENSG00000164307 | ERAP1      | 0.65 | -1.54 | -0.62 | 1.37E-08 | -1.32E+04 | 1.32E+04 |
| ENSG00000118946 | PCDH17     | 0.44 | -2.26 | -1.17 | 2.97E-08 | -1.31E+04 | 1.31E+04 |
| ENSG00000102024 | PLS3       | 1.75 | 1.75  | 0.81  | 1.79E-08 | 1.31E+04  | 1.31E+04 |
| ENSG00000066697 | MSANTD3    | 1.58 | 1.58  | 0.66  | 1.46E-08 | 1.31E+04  | 1.31E+04 |
| ENSG00000167555 | ZNF528     | 1.70 | 1.70  | 0.77  | 1.72E-08 | 1.30E+04  | 1.30E+04 |
| ENSG00000151474 | FRMD4A     | 1.57 | 1.57  | 0.65  | 1.48E-08 | 1.29E+04  | 1.29E+04 |
| ENSG00000107140 | TESK1      | 1.61 | 1.61  | 0.69  | 1.56E-08 | 1.29E+04  | 1.29E+04 |

|                 |               |      |       |       |          |           |          |
|-----------------|---------------|------|-------|-------|----------|-----------|----------|
| ENSG00000176641 | RNF152        | 0.63 | -1.59 | -0.67 | 1.55E-08 | -1.28E+04 | 1.28E+04 |
| ENSG00000260006 | RP11-469M7.1  | 0.61 | -1.64 | -0.71 | 1.67E-08 | -1.27E+04 | 1.27E+04 |
| ENSG00000230513 | THAP7-AS1     | 2.15 | 2.15  | 1.10  | 2.87E-08 | 1.27E+04  | 1.27E+04 |
| ENSG00000196943 | NOP9          | 0.65 | -1.53 | -0.61 | 1.45E-08 | -1.27E+04 | 1.27E+04 |
| ENSG00000179965 | ZNF771        | 0.55 | -1.83 | -0.87 | 2.10E-08 | -1.26E+04 | 1.26E+04 |
| ENSG00000166451 | CENPN         | 0.65 | -1.53 | -0.62 | 1.49E-08 | -1.26E+04 | 1.26E+04 |
| ENSG00000141519 | CCDC40        | 1.86 | 1.86  | 0.90  | 2.21E-08 | 1.25E+04  | 1.25E+04 |
| ENSG00000227124 | ZNF717        | 1.67 | 1.67  | 0.74  | 1.81E-08 | 1.24E+04  | 1.24E+04 |
| ENSG00000108561 | C1QBP         | 0.63 | -1.58 | -0.66 | 1.65E-08 | -1.23E+04 | 1.23E+04 |
| ENSG00000267583 | RP11-322E11.5 | 1.56 | 1.56  | 0.64  | 1.61E-08 | 1.23E+04  | 1.23E+04 |
| ENSG00000072201 | LNX1          | 1.75 | 1.75  | 0.81  | 2.07E-08 | 1.22E+04  | 1.22E+04 |
| ENSG00000197415 | VEPH1         | 1.57 | 1.57  | 0.66  | 1.68E-08 | 1.21E+04  | 1.21E+04 |
| ENSG00000025770 | NCAPH2        | 0.66 | -1.51 | -0.60 | 1.58E-08 | -1.20E+04 | 1.20E+04 |
| ENSG00000135932 | CAB39         | 1.55 | 1.55  | 0.63  | 1.66E-08 | 1.20E+04  | 1.20E+04 |
| ENSG00000160818 | GPATCH4       | 0.62 | -1.62 | -0.69 | 1.81E-08 | -1.20E+04 | 1.20E+04 |
| ENSG00000080839 | RBL1          | 0.65 | -1.53 | -0.61 | 1.61E-08 | -1.20E+04 | 1.20E+04 |
| ENSG00000088387 | DOCK9         | 1.56 | 1.56  | 0.64  | 1.72E-08 | 1.19E+04  | 1.19E+04 |
|                 | RP11-18F14.2  | 1.55 | 1.55  | 0.63  | 1.72E-08 | 1.18E+04  | 1.18E+04 |
| ENSG00000259380 | RP11-346D14.1 | 1.88 | 1.88  | 0.91  | 2.59E-08 | 1.17E+04  | 1.17E+04 |
| ENSG00000070882 | OSBPL3        | 1.56 | 1.56  | 0.64  | 1.77E-08 | 1.17E+04  | 1.17E+04 |
| ENSG00000173451 | THAP2         | 1.62 | 1.62  | 0.69  | 1.91E-08 | 1.17E+04  | 1.17E+04 |
| ENSG00000223973 | AC068491.1    | 1.52 | 1.52  | 0.60  | 1.70E-08 | 1.16E+04  | 1.16E+04 |
| ENSG00000167378 | IRGQ          | 1.54 | 1.54  | 0.62  | 1.75E-08 | 1.16E+04  | 1.16E+04 |
| ENSG00000011566 | MAP4K3        | 1.53 | 1.53  | 0.62  | 1.77E-08 | 1.15E+04  | 1.15E+04 |
| ENSG00000200169 | RNU5D-1       | 0.39 | -2.55 | -1.35 | 4.99E-08 | -1.14E+04 | 1.14E+04 |
| ENSG00000165886 | UBTD1         | 1.52 | 1.52  | 0.60  | 1.77E-08 | 1.14E+04  | 1.14E+04 |
| ENSG00000117481 | NSUN4         | 0.64 | -1.57 | -0.66 | 1.93E-08 | -1.13E+04 | 1.13E+04 |
| ENSG00000151552 | QDPR          | 0.47 | -2.13 | -1.09 | 3.57E-08 | -1.13E+04 | 1.13E+04 |
| ENSG00000102547 | CAB39L        | 1.57 | 1.57  | 0.65  | 1.94E-08 | 1.13E+04  | 1.13E+04 |
| ENSG00000136603 | SKIL          | 1.71 | 1.71  | 0.77  | 2.29E-08 | 1.13E+04  | 1.13E+04 |
| ENSG00000123179 | EBPL          | 0.59 | -1.69 | -0.76 | 2.27E-08 | -1.12E+04 | 1.12E+04 |
| ENSG00000169379 | ARL13B        | 0.65 | -1.55 | -0.63 | 1.90E-08 | -1.12E+04 | 1.12E+04 |
| ENSG00000075407 | ZNF37A        | 1.68 | 1.68  | 0.75  | 2.24E-08 | 1.12E+04  | 1.12E+04 |
| ENSG00000113161 | HMGCR         | 0.63 | -1.58 | -0.66 | 1.98E-08 | -1.12E+04 | 1.12E+04 |
| ENSG00000240891 | PLCXD2        | 1.93 | 1.93  | 0.95  | 3.00E-08 | 1.12E+04  | 1.12E+04 |
| ENSG00000158435 | C2orf29       | 0.64 | -1.57 | -0.65 | 2.01E-08 | -1.11E+04 | 1.11E+04 |
| ENSG00000148814 | LRRC27        | 1.67 | 1.67  | 0.74  | 2.30E-08 | 1.10E+04  | 1.10E+04 |
| ENSG00000182606 | TRAK1         | 1.57 | 1.57  | 0.65  | 2.03E-08 | 1.10E+04  | 1.10E+04 |
| ENSG00000132376 | INPP5K        | 0.66 | -1.52 | -0.60 | 1.90E-08 | -1.10E+04 | 1.10E+04 |
| ENSG00000125871 | C20orf72      | 1.54 | 1.54  | 0.62  | 1.95E-08 | 1.10E+04  | 1.10E+04 |
| ENSG00000187097 | ENTPD5        | 1.53 | 1.53  | 0.61  | 1.95E-08 | 1.09E+04  | 1.09E+04 |
| ENSG00000100003 | SEC14L2       | 0.56 | -1.79 | -0.84 | 2.70E-08 | -1.09E+04 | 1.09E+04 |
| ENSG00000087077 | TRIP6         | 0.66 | -1.52 | -0.60 | 1.96E-08 | -1.08E+04 | 1.08E+04 |
| ENSG00000278540 | ACACA         | 0.64 | -1.55 | -0.63 | 2.05E-08 | -1.08E+04 | 1.08E+04 |
| ENSG00000100911 | PSME2         | 0.65 | -1.54 | -0.62 | 2.08E-08 | -1.07E+04 | 1.07E+04 |
| ENSG00000206538 | VGLL3         | 0.60 | -1.67 | -0.74 | 2.47E-08 | -1.06E+04 | 1.06E+04 |
| ENSG00000184602 | SNN           | 1.57 | 1.57  | 0.65  | 2.24E-08 | 1.05E+04  | 1.05E+04 |
| ENSG00000129636 | ITFG1         | 1.54 | 1.54  | 0.63  | 2.16E-08 | 1.05E+04  | 1.05E+04 |
| ENSG00000053372 | MRT04         | 0.65 | -1.53 | -0.61 | 2.16E-08 | -1.04E+04 | 1.04E+04 |
| ENSG00000143322 | ABL2          | 1.57 | 1.57  | 0.65  | 2.29E-08 | 1.04E+04  | 1.04E+04 |
| ENSG00000137225 | CAPN11        | 2.33 | 2.33  | 1.22  | 5.07E-08 | 1.03E+04  | 1.03E+04 |
| ENSG00000188186 | LAMTOR4       | 0.62 | -1.60 | -0.68 | 2.45E-08 | -1.02E+04 | 1.02E+04 |
| ENSG00000100979 | PLTP          | 0.59 | -1.69 | -0.76 | 2.74E-08 | -1.02E+04 | 1.02E+04 |
| ENSG00000078269 | SYNJ2         | 1.65 | 1.65  | 0.72  | 2.62E-08 | 1.02E+04  | 1.02E+04 |
| ENSG00000157557 | ETS2          | 1.62 | 1.62  | 0.70  | 2.60E-08 | 1.01E+04  | 1.01E+04 |
| ENSG00000118418 | HMGN3         | 0.65 | -1.54 | -0.62 | 2.34E-08 | -1.01E+04 | 1.01E+04 |
| ENSG00000170145 | SIK2          | 1.65 | 1.65  | 0.72  | 2.70E-08 | 1.01E+04  | 1.01E+04 |
| ENSG00000183401 | CCDC159       | 0.53 | -1.87 | -0.91 | 3.49E-08 | -1.00E+04 | 1.00E+04 |
| ENSG00000119929 | CUTC          | 0.66 | -1.52 | -0.60 | 2.32E-08 | -9.98E+03 | 9.98E+03 |
| ENSG00000116852 | KIF21B        | 0.56 | -1.78 | -0.83 | 3.18E-08 | -9.98E+03 | 9.98E+03 |
| ENSG00000221963 | APOL6         | 0.60 | -1.67 | -0.74 | 2.82E-08 | -9.96E+03 | 9.96E+03 |
| ENSG00000138587 | MNS1          | 0.46 | -2.18 | -1.13 | 4.81E-08 | -9.95E+03 | 9.95E+03 |
| ENSG00000178033 | FAM26E        | 1.51 | 1.51  | 0.59  | 2.34E-08 | 9.85E+03  | 9.85E+03 |
| ENSG00000130313 | PGLS          | 1.58 | 1.58  | 0.66  | 2.58E-08 | 9.84E+03  | 9.84E+03 |
| ENSG00000213341 | CHUK          | 0.64 | -1.56 | -0.64 | 2.51E-08 | -9.83E+03 | 9.83E+03 |
| ENSG00000204161 | C10orf128     | 0.52 | -1.93 | -0.95 | 3.86E-08 | -9.82E+03 | 9.82E+03 |
| ENSG00000068489 | PRR11         | 0.65 | -1.55 | -0.63 | 2.51E-08 | -9.77E+03 | 9.77E+03 |
| ENSG00000184588 | PDE4B         | 1.55 | 1.55  | 0.63  | 2.56E-08 | 9.69E+03  | 9.69E+03 |
| ENSG00000187118 | CMC1          | 0.60 | -1.66 | -0.73 | 2.96E-08 | -9.65E+03 | 9.65E+03 |
| ENSG00000129055 | ANAPC13       | 1.59 | 1.59  | 0.67  | 2.75E-08 | 9.60E+03  | 9.60E+03 |
| ENSG00000130158 | DOCK6         | 1.52 | 1.52  | 0.61  | 2.52E-08 | 9.59E+03  | 9.59E+03 |
| ENSG00000123191 | ATP7B         | 1.63 | 1.63  | 0.70  | 3.01E-08 | 9.37E+03  | 9.37E+03 |
| ENSG00000260398 | RP11-594N15.3 | 2.39 | 2.39  | 1.25  | 6.61E-08 | 9.28E+03  | 9.28E+03 |
| ENSG00000157193 | LRP8          | 0.66 | -1.52 | -0.60 | 2.69E-08 | -9.25E+03 | 9.25E+03 |
| ENSG00000171298 | GAA           | 1.75 | 1.75  | 0.81  | 3.61E-08 | 9.23E+03  | 9.23E+03 |
| ENSG00000141560 | FN3KRP        | 0.62 | -1.62 | -0.70 | 3.08E-08 | -9.23E+03 | 9.23E+03 |
|                 | RP11-159D12.9 | 1.72 | 1.72  | 0.78  | 3.50E-08 | 9.17E+03  | 9.17E+03 |
| ENSG00000149489 | ROM1          | 0.51 | -1.94 | -0.96 | 4.58E-08 | -9.09E+03 | 9.09E+03 |
| ENSG00000071205 | ARHGAP10      | 1.52 | 1.52  | 0.61  | 2.84E-08 | 9.04E+03  | 9.04E+03 |

|                  |              |      |       |       |          |           |          |
|------------------|--------------|------|-------|-------|----------|-----------|----------|
| ENSG00000163132  | MSX1         | 2.15 | 2.15  | 1.10  | 5.77E-08 | 8.95E+03  | 8.95E+03 |
| ENSG00000112186  | CAP2         | 0.65 | -1.55 | -0.63 | 3.05E-08 | -8.86E+03 | 8.86E+03 |
| ENSG00000153214  | TMEM87B      | 1.52 | 1.52  | 0.61  | 3.04E-08 | 8.73E+03  | 8.73E+03 |
| ENSG00000137274  | BPHL         | 1.55 | 1.55  | 0.64  | 3.21E-08 | 8.68E+03  | 8.68E+03 |
| ENSG00000198805  | PNP          | 1.57 | 1.57  | 0.65  | 3.28E-08 | 8.67E+03  | 8.67E+03 |
| ENSG00000144445  | KANSL1L      | 1.57 | 1.57  | 0.65  | 3.30E-08 | 8.64E+03  | 8.64E+03 |
| ENSG00000277075  | HIST1H2AE    | 0.62 | -1.60 | -0.68 | 3.48E-08 | -8.58E+03 | 8.58E+03 |
| ENSG00000167100  | SAMD14       | 0.47 | -2.15 | -1.10 | 6.32E-08 | -8.55E+03 | 8.55E+03 |
| ENSG00000106688  | SLC1A1       | 0.65 | -1.53 | -0.61 | 3.23E-08 | -8.51E+03 | 8.51E+03 |
| ENSG00000196352  | CD55         | 1.57 | 1.57  | 0.65  | 3.40E-08 | 8.51E+03  | 8.51E+03 |
| ENSG00000204084  | INPP5B       | 0.66 | -1.52 | -0.60 | 3.21E-08 | -8.47E+03 | 8.47E+03 |
|                  | CTA-204B4.6  | 1.60 | 1.60  | 0.68  | 3.62E-08 | 8.39E+03  | 8.39E+03 |
| ENSG00000136732  | GYPC         | 1.66 | 1.66  | 0.74  | 3.98E-08 | 8.34E+03  | 8.34E+03 |
| ENSG00000278705  | HIST1H4B     | 0.60 | -1.68 | -0.75 | 4.06E-08 | -8.33E+03 | 8.33E+03 |
| ENSG00000186575  | NF2          | 1.59 | 1.59  | 0.67  | 3.66E-08 | 8.31E+03  | 8.31E+03 |
| ENSG00000196976  | LAGE3        | 0.63 | -1.60 | -0.68 | 3.73E-08 | -8.28E+03 | 8.28E+03 |
| ENSG00000170776  | AKAP13       | 1.55 | 1.55  | 0.63  | 3.49E-08 | 8.27E+03  | 8.27E+03 |
| ENSG00000172336  | POP7         | 0.66 | -1.51 | -0.59 | 3.36E-08 | -8.24E+03 | 8.24E+03 |
| ENSG00000140474  | ULK3         | 0.66 | -1.51 | -0.60 | 3.39E-08 | -8.21E+03 | 8.21E+03 |
| ENSG00000151640  | DPYSL4       | 2.09 | 2.09  | 1.07  | 6.50E-08 | 8.21E+03  | 8.21E+03 |
| ENSG00000145779  | TNFAIP8      | 0.62 | -1.60 | -0.68 | 3.82E-08 | -8.19E+03 | 8.19E+03 |
| ENSG00000171451  | DSEL         | 0.65 | -1.54 | -0.62 | 3.53E-08 | -8.19E+03 | 8.19E+03 |
| ENSG00000186594  | MIR22HG      | 1.50 | 1.50  | 0.58  | 3.38E-08 | 8.14E+03  | 8.14E+03 |
| ENSG00000146648  | EGFR         | 1.76 | 1.76  | 0.82  | 4.71E-08 | 8.13E+03  | 8.13E+03 |
| ENSG00000188365  | AC092171.1   | 2.25 | 2.25  | 1.17  | 7.86E-08 | 8.04E+03  | 8.04E+03 |
| ENSG00000164509  | IL31RA       | 0.51 | -1.97 | -0.98 | 6.00E-08 | -8.04E+03 | 8.04E+03 |
| ENSG00000182489  | XKRX         | 1.99 | 1.99  | 0.99  | 6.12E-08 | 8.03E+03  | 8.03E+03 |
| ENSG00000171097  | CCBL1        | 0.59 | -1.70 | -0.77 | 4.51E-08 | -8.02E+03 | 8.02E+03 |
| ENSG00000181284  | TMEM102      | 1.66 | 1.66  | 0.73  | 4.46E-08 | 7.87E+03  | 7.87E+03 |
| ENSG00000274471  | HERC2P2      | 0.64 | -1.57 | -0.65 | 3.96E-08 | -7.87E+03 | 7.87E+03 |
| ENSG00000136051  | KIAA1033     | 1.69 | 1.69  | 0.76  | 4.64E-08 | 7.87E+03  | 7.87E+03 |
| ENSG00000103404  | USP31        | 1.54 | 1.54  | 0.62  | 3.83E-08 | 7.85E+03  | 7.85E+03 |
| ENSG00000197386  | HTT          | 1.58 | 1.58  | 0.66  | 4.05E-08 | 7.84E+03  | 7.84E+03 |
| ENSG00000120833  | SOCS2        | 1.59 | 1.59  | 0.67  | 4.11E-08 | 7.83E+03  | 7.83E+03 |
| ENSG00000161904  | LEMD2        | 1.54 | 1.54  | 0.63  | 3.88E-08 | 7.83E+03  | 7.83E+03 |
| ENSG00000132294  | EFR3A        | 1.54 | 1.54  | 0.63  | 3.99E-08 | 7.73E+03  | 7.73E+03 |
| ENSG00000196458  | ZNF605       | 1.74 | 1.74  | 0.80  | 5.11E-08 | 7.69E+03  | 7.69E+03 |
| ENSG00000100106  | TRIOBP       | 1.52 | 1.52  | 0.60  | 3.91E-08 | 7.68E+03  | 7.68E+03 |
| ENSG00000165698  | C9orf9       | 1.92 | 1.92  | 0.94  | 6.28E-08 | 7.65E+03  | 7.65E+03 |
| ENSG00000152894  | PTPRK        | 1.54 | 1.54  | 0.63  | 4.09E-08 | 7.63E+03  | 7.63E+03 |
| ENSG00000180448  | HMHA1        | 2.45 | 2.45  | 1.29  | 1.03E-07 | 7.61E+03  | 7.61E+03 |
| ENSG00000159216  | RUNX1        | 1.58 | 1.58  | 0.66  | 4.30E-08 | 7.60E+03  | 7.60E+03 |
|                  | RP4-811H24.6 | 2.17 | 2.17  | 1.12  | 8.24E-08 | 7.55E+03  | 7.55E+03 |
| ENSG00000105227  | PRX          | 1.83 | 1.83  | 0.87  | 5.88E-08 | 7.53E+03  | 7.53E+03 |
| ENSG00000198399  | ITSN2        | 1.59 | 1.59  | 0.67  | 4.52E-08 | 7.50E+03  | 7.50E+03 |
| ENSG00000131844  | MCCC2        | 0.67 | -1.49 | -0.58 | 3.98E-08 | -7.48E+03 | 7.48E+03 |
| ENSG00000211772  | TRBC2        | 0.65 | -1.55 | -0.63 | 4.28E-08 | -7.48E+03 | 7.48E+03 |
| ENSG00000100162  | CENPM        | 0.62 | -1.61 | -0.69 | 4.69E-08 | -7.45E+03 | 7.45E+03 |
| ENSG00000100889  | PCK2         | 0.65 | -1.55 | -0.63 | 4.38E-08 | -7.40E+03 | 7.40E+03 |
| ENSG00000196418  | ZNF124       | 1.53 | 1.53  | 0.61  | 4.27E-08 | 7.39E+03  | 7.39E+03 |
| ENSG00000178075  | GRAMD1C      | 1.73 | 1.73  | 0.79  | 5.56E-08 | 7.35E+03  | 7.35E+03 |
| ENSG00000044446  | PHKA2        | 0.65 | -1.54 | -0.62 | 4.53E-08 | -7.22E+03 | 7.22E+03 |
| ENSG00000015133  | CCDC88C      | 1.54 | 1.54  | 0.62  | 4.57E-08 | 7.20E+03  | 7.20E+03 |
| ENSG00000127837  | AAMP         | 0.66 | -1.51 | -0.60 | 4.48E-08 | -7.15E+03 | 7.15E+03 |
| ENSG00000179776  | CDH5         | 1.59 | 1.59  | 0.67  | 5.02E-08 | 7.11E+03  | 7.11E+03 |
| ENSG00000140836  | ZFHX3        | 1.54 | 1.54  | 0.62  | 4.75E-08 | 7.06E+03  | 7.06E+03 |
| ENSG00000204574  | ABCF1        | 0.62 | -1.61 | -0.69 | 5.24E-08 | -7.03E+03 | 7.03E+03 |
| ENSG00000163239  | TDRD10       | 1.84 | 1.84  | 0.88  | 6.86E-08 | 7.02E+03  | 7.02E+03 |
| ENSG00000078804  | TP53INP2     | 1.64 | 1.64  | 0.71  | 5.48E-08 | 7.01E+03  | 7.01E+03 |
| ENSG00000153363  | LINC00467    | 1.79 | 1.79  | 0.84  | 6.52E-08 | 7.01E+03  | 7.01E+03 |
| ENSG00000132603  | NIP7         | 0.66 | -1.52 | -0.60 | 4.68E-08 | -7.01E+03 | 7.01E+03 |
| ENSG000000020129 | NCDN         | 1.58 | 1.58  | 0.66  | 5.10E-08 | 7.00E+03  | 7.00E+03 |
| ENSG00000119681  | LTBP2        | 1.86 | 1.86  | 0.90  | 7.14E-08 | 6.98E+03  | 6.98E+03 |
| ENSG00000150593  | PDCD4        | 1.51 | 1.51  | 0.59  | 4.68E-08 | 6.97E+03  | 6.97E+03 |
| ENSG00000170892  | TSEN34       | 0.66 | -1.51 | -0.59 | 4.76E-08 | -6.90E+03 | 6.90E+03 |
| ENSG00000143819  | EPHX1        | 0.56 | -1.78 | -0.83 | 6.77E-08 | -6.85E+03 | 6.85E+03 |
| ENSG00000153391  | INO80C       | 1.55 | 1.55  | 0.63  | 5.13E-08 | 6.85E+03  | 6.85E+03 |
| ENSG00000101019  | UQCC         | 1.63 | 1.63  | 0.70  | 5.67E-08 | 6.85E+03  | 6.85E+03 |
| ENSG00000147697  | GSDMC        | 1.92 | 1.92  | 0.94  | 7.89E-08 | 6.82E+03  | 6.82E+03 |
| ENSG00000197632  | SERPINB2     | 0.45 | -2.21 | -1.15 | 1.06E-07 | -6.81E+03 | 6.81E+03 |
| ENSG00000137135  | ARHGEF39     | 0.52 | -1.94 | -0.96 | 8.14E-08 | -6.79E+03 | 6.79E+03 |
| ENSG00000214944  | ARHGEF28     | 1.57 | 1.57  | 0.65  | 5.32E-08 | 6.79E+03  | 6.79E+03 |
| ENSG00000159915  | ZNF233       | 2.38 | 2.38  | 1.25  | 1.23E-07 | 6.79E+03  | 6.79E+03 |
| ENSG00000213465  | ARL2         | 1.55 | 1.55  | 0.63  | 5.37E-08 | 6.68E+03  | 6.68E+03 |
| ENSG00000067057  | PFKP         | 1.58 | 1.58  | 0.66  | 5.57E-08 | 6.68E+03  | 6.68E+03 |
| ENSG00000147027  | TMEM47       | 1.58 | 1.58  | 0.66  | 5.65E-08 | 6.67E+03  | 6.67E+03 |
| ENSG00000106089  | STX1A        | 1.60 | 1.60  | 0.68  | 5.83E-08 | 6.63E+03  | 6.63E+03 |
| ENSG00000135372  | NAT10        | 0.61 | -1.63 | -0.70 | 6.05E-08 | -6.62E+03 | 6.62E+03 |
| ENSG00000150756  | FAM173B      | 0.65 | -1.53 | -0.61 | 5.36E-08 | -6.61E+03 | 6.61E+03 |

|                 |                |      |       |       |          |           |          |
|-----------------|----------------|------|-------|-------|----------|-----------|----------|
| ENSG00000188070 | C11orf95       | 1.50 | 1.50  | 0.59  | 5.21E-08 | 6.58E+03  | 6.58E+03 |
| ENSG00000184357 | HIST1H1B       | 0.64 | -1.55 | -0.64 | 5.59E-08 | -6.57E+03 | 6.57E+03 |
| ENSG00000158406 | HIST1H4H       | 0.59 | -1.68 | -0.75 | 6.62E-08 | -6.54E+03 | 6.54E+03 |
| ENSG00000243251 | PGBD3          | 0.60 | -1.66 | -0.73 | 6.55E-08 | -6.49E+03 | 6.49E+03 |
| ENSG00000160345 | C9orf116       | 1.94 | 1.94  | 0.96  | 8.98E-08 | 6.47E+03  | 6.47E+03 |
| ENSG00000111271 | ACAD10         | 1.65 | 1.65  | 0.72  | 6.51E-08 | 6.46E+03  | 6.46E+03 |
| ENSG00000167394 | ZNF668         | 1.56 | 1.56  | 0.64  | 5.86E-08 | 6.45E+03  | 6.45E+03 |
| ENSG00000260630 | SNAI3-AS1      | 1.73 | 1.73  | 0.79  | 7.24E-08 | 6.42E+03  | 6.42E+03 |
| ENSG00000163617 | KIAA1407       | 2.01 | 2.01  | 1.01  | 9.80E-08 | 6.42E+03  | 6.42E+03 |
| ENSG00000100216 | TOMM22         | 0.65 | -1.54 | -0.62 | 5.72E-08 | -6.42E+03 | 6.42E+03 |
| ENSG00000110422 | HIPK3          | 1.59 | 1.59  | 0.67  | 6.19E-08 | 6.38E+03  | 6.38E+03 |
| ENSG00000198478 | SH3BGRL2       | 1.49 | 1.49  | 0.58  | 5.52E-08 | 6.35E+03  | 6.35E+03 |
| ENSG00000142408 | CACNG8         | 2.06 | 2.06  | 1.04  | 1.05E-07 | 6.35E+03  | 6.35E+03 |
| ENSG00000160058 | BSDC1          | 1.53 | 1.53  | 0.62  | 5.83E-08 | 6.34E+03  | 6.34E+03 |
| ENSG00000198498 | TMA16          | 0.67 | -1.50 | -0.59 | 5.79E-08 | -6.24E+03 | 6.24E+03 |
| ENSG00000260641 | RP11-1299A16.3 | 1.81 | 1.81  | 0.86  | 8.52E-08 | 6.22E+03  | 6.22E+03 |
| ENSG00000035687 | ADSS           | 0.65 | -1.53 | -0.62 | 6.11E-08 | -6.20E+03 | 6.20E+03 |
| ENSG00000176749 | CDK5R1         | 1.78 | 1.78  | 0.83  | 8.33E-08 | 6.18E+03  | 6.18E+03 |
| ENSG00000258311 | BLOC1S1        | 0.63 | -1.59 | -0.67 | 6.60E-08 | -6.17E+03 | 6.17E+03 |
| ENSG00000113240 | CLK4           | 0.63 | -1.59 | -0.67 | 6.62E-08 | -6.17E+03 | 6.17E+03 |
| ENSG00000175854 | SWI5           | 1.51 | 1.51  | 0.59  | 5.99E-08 | 6.16E+03  | 6.16E+03 |
| ENSG00000186354 | C9orf47        | 0.48 | -2.10 | -1.07 | 1.17E-07 | -6.14E+03 | 6.14E+03 |
| ENSG00000108433 | GOSR2          | 0.67 | -1.49 | -0.58 | 5.97E-08 | -6.11E+03 | 6.11E+03 |
| ENSG00000065457 | ADAT1          | 1.49 | 1.49  | 0.57  | 5.97E-08 | 6.09E+03  | 6.09E+03 |
| ENSG00000243279 | PRAF2          | 0.50 | -2.00 | -1.00 | 1.08E-07 | -6.08E+03 | 6.08E+03 |
| ENSG00000006015 | C19orf60       | 0.66 | -1.51 | -0.59 | 6.16E-08 | -6.07E+03 | 6.07E+03 |
| ENSG00000259623 | RP11-156E6.1   | 0.63 | -1.58 | -0.66 | 6.87E-08 | -6.05E+03 | 6.05E+03 |
| ENSG00000172260 | NEGR1          | 0.58 | -1.74 | -0.80 | 8.30E-08 | -6.03E+03 | 6.03E+03 |
| ENSG00000112972 | HMGCS1         | 0.64 | -1.56 | -0.64 | 6.73E-08 | -6.02E+03 | 6.02E+03 |
| ENSG00000159055 | MIS18A         | 0.66 | -1.51 | -0.60 | 6.40E-08 | -5.97E+03 | 5.97E+03 |
| ENSG00000119922 | IFIT2          | 0.46 | -2.16 | -1.11 | 1.32E-07 | -5.95E+03 | 5.95E+03 |
| ENSG00000135446 | CDK4           | 0.65 | -1.53 | -0.61 | 6.73E-08 | -5.89E+03 | 5.89E+03 |
| ENSG00000213380 | COG8           | 0.65 | -1.54 | -0.62 | 6.83E-08 | -5.89E+03 | 5.89E+03 |
| ENSG00000011028 | MRC2           | 0.49 | -2.03 | -1.02 | 1.22E-07 | -5.83E+03 | 5.83E+03 |
| ENSG00000124067 | SLC12A4        | 1.51 | 1.51  | 0.60  | 6.96E-08 | 5.74E+03  | 5.74E+03 |
| ENSG00000083838 | ZNF446         | 1.58 | 1.58  | 0.66  | 7.66E-08 | 5.73E+03  | 5.73E+03 |
| ENSG00000270722 | U1             | 0.52 | -1.93 | -0.95 | 1.15E-07 | -5.69E+03 | 5.69E+03 |
| ENSG00000143493 | INTS7          | 0.66 | -1.51 | -0.60 | 7.13E-08 | -5.66E+03 | 5.66E+03 |
| ENSG00000170396 | ZNF804A        | 0.46 | -2.19 | -1.13 | 1.50E-07 | -5.65E+03 | 5.65E+03 |
| ENSG00000168298 | HIST1H1E       | 0.65 | -1.55 | -0.63 | 7.62E-08 | -5.61E+03 | 5.61E+03 |
| ENSG00000160796 | NBEAL2         | 1.51 | 1.51  | 0.59  | 7.26E-08 | 5.59E+03  | 5.59E+03 |
| ENSG00000082497 | SERTAD4        | 1.74 | 1.74  | 0.80  | 9.69E-08 | 5.58E+03  | 5.58E+03 |
| ENSG00000197102 | DYNC1H1        | 1.64 | 1.64  | 0.71  | 8.62E-08 | 5.58E+03  | 5.58E+03 |
| ENSG00000172936 | MYD88          | 1.84 | 1.84  | 0.88  | 1.09E-07 | 5.57E+03  | 5.57E+03 |
| ENSG00000089818 | NECAP1         | 0.67 | -1.49 | -0.57 | 7.22E-08 | -5.54E+03 | 5.54E+03 |
| ENSG00000136830 | FAM129B        | 1.57 | 1.57  | 0.65  | 8.15E-08 | 5.49E+03  | 5.49E+03 |
| ENSG00000188130 | MAPK12         | 0.67 | -1.50 | -0.59 | 7.49E-08 | -5.49E+03 | 5.49E+03 |
| ENSG00000137310 | TCF19          | 0.65 | -1.54 | -0.62 | 7.94E-08 | -5.46E+03 | 5.46E+03 |
| ENSG00000143353 | LYPLAL1        | 1.52 | 1.52  | 0.60  | 7.77E-08 | 5.46E+03  | 5.46E+03 |
| ENSG00000159231 | CBR3           | 0.64 | -1.56 | -0.64 | 8.23E-08 | -5.44E+03 | 5.44E+03 |
| ENSG00000006704 | GTF2IRD1       | 1.57 | 1.57  | 0.65  | 8.38E-08 | 5.43E+03  | 5.43E+03 |
| ENSG00000144455 | SUMF1          | 1.50 | 1.50  | 0.58  | 7.64E-08 | 5.42E+03  | 5.42E+03 |
| ENSG00000164124 | TMEM144        | 1.65 | 1.65  | 0.72  | 9.39E-08 | 5.39E+03  | 5.39E+03 |
| ENSG00000105671 | DDX49          | 0.66 | -1.51 | -0.60 | 8.06E-08 | -5.34E+03 | 5.34E+03 |
| ENSG00000166432 | ZMAT1          | 2.05 | 2.05  | 1.03  | 1.49E-07 | 5.29E+03  | 5.29E+03 |
| ENSG00000135912 | TTL4           | 0.66 | -1.52 | -0.60 | 8.27E-08 | -5.29E+03 | 5.29E+03 |
| ENSG00000075420 | FNDC3B         | 1.53 | 1.53  | 0.61  | 8.36E-08 | 5.28E+03  | 5.28E+03 |
| ENSG00000133641 | C12orf29       | 0.65 | -1.55 | -0.63 | 8.64E-08 | -5.27E+03 | 5.27E+03 |
| ENSG00000102384 | CENPI          | 0.65 | -1.54 | -0.62 | 8.60E-08 | -5.25E+03 | 5.25E+03 |
| ENSG00000114738 | MAPKAPK3       | 0.65 | -1.55 | -0.63 | 8.69E-08 | -5.24E+03 | 5.24E+03 |
| ENSG00000206053 | HN1L           | 0.66 | -1.52 | -0.61 | 8.47E-08 | -5.24E+03 | 5.24E+03 |
| ENSG00000185347 | C14orf80       | 0.58 | -1.71 | -0.77 | 1.07E-07 | -5.23E+03 | 5.23E+03 |
| ENSG00000215447 | BX322557.10    | 1.64 | 1.64  | 0.71  | 9.80E-08 | 5.22E+03  | 5.22E+03 |
| ENSG00000078687 | TNRC6C         | 1.65 | 1.65  | 0.72  | 1.01E-07 | 5.20E+03  | 5.20E+03 |
| ENSG00000132646 | PCNA           | 0.65 | -1.53 | -0.61 | 8.66E-08 | -5.20E+03 | 5.20E+03 |
| ENSG00000169855 | ROBO1          | 0.66 | -1.52 | -0.61 | 8.70E-08 | -5.17E+03 | 5.17E+03 |
| ENSG00000205356 | TECPR1         | 1.54 | 1.54  | 0.62  | 8.92E-08 | 5.15E+03  | 5.15E+03 |
| ENSG00000095951 | HIVEP1         | 1.62 | 1.62  | 0.70  | 9.95E-08 | 5.15E+03  | 5.15E+03 |
| ENSG0000010704  | RP11-454H13.5  | 0.46 | -2.19 | -1.13 | 1.83E-07 | -5.11E+03 | 5.11E+03 |
| ENSG00000064726 | HFE            | 0.63 | -1.59 | -0.67 | 9.77E-08 | -5.08E+03 | 5.08E+03 |
| ENSG00000064726 | BTBD1          | 0.65 | -1.53 | -0.61 | 9.11E-08 | -5.06E+03 | 5.06E+03 |
| ENSG00000274997 | HIST1H2AH      | 0.64 | -1.55 | -0.63 | 9.52E-08 | -5.03E+03 | 5.03E+03 |
| ENSG00000144231 | POLR2D         | 0.66 | -1.51 | -0.59 | 8.98E-08 | -5.03E+03 | 5.03E+03 |
| ENSG00000079150 | FKBP7          | 1.53 | 1.53  | 0.62  | 9.50E-08 | 4.97E+03  | 4.97E+03 |
| ENSG00000234745 | HLA-B          | 1.53 | 1.53  | 0.62  | 9.54E-08 | 4.97E+03  | 4.97E+03 |
| ENSG00000145354 | CISD2          | 0.62 | -1.62 | -0.70 | 1.06E-07 | -4.96E+03 | 4.96E+03 |
| ENSG00000175048 | ZDHHC14        | 0.64 | -1.56 | -0.64 | 9.88E-08 | -4.96E+03 | 4.96E+03 |
| ENSG00000177425 | PAWR           | 1.52 | 1.52  | 0.60  | 9.38E-08 | 4.96E+03  | 4.96E+03 |
| ENSG00000168894 | RNF181         | 0.66 | -1.51 | -0.60 | 9.33E-08 | -4.95E+03 | 4.95E+03 |

|                  |              |      |       |       |          |           |          |
|------------------|--------------|------|-------|-------|----------|-----------|----------|
| ENSG00000196950  | AC011526.1   | 1.51 | 1.51  | 0.60  | 9.39E-08 | 4.94E+03  | 4.94E+03 |
| ENSG00000196365  | SLC39A10     | 1.61 | 1.61  | 0.69  | 1.07E-07 | 4.92E+03  | 4.92E+03 |
| ENSG00000033100  | LONP1        | 0.66 | -1.51 | -0.59 | 9.49E-08 | -4.89E+03 | 4.89E+03 |
| ENSG000000174327 | CHPF2        | 1.57 | 1.57  | 0.65  | 1.05E-07 | 4.86E+03  | 4.86E+03 |
| ENSG00000154240  | SLC16A13     | 2.00 | 2.00  | 1.00  | 1.69E-07 | 4.86E+03  | 4.86E+03 |
| ENSG00000155366  | CEP112       | 1.78 | 1.78  | 0.83  | 1.35E-07 | 4.84E+03  | 4.84E+03 |
| ENSG00000130749  | RHOC         | 1.53 | 1.53  | 0.62  | 1.01E-07 | 4.81E+03  | 4.81E+03 |
| ENSG00000204130  | ZC3H4        | 1.61 | 1.61  | 0.69  | 1.13E-07 | 4.81E+03  | 4.81E+03 |
| ENSG00000084693  | RUFY2        | 1.56 | 1.56  | 0.64  | 1.06E-07 | 4.79E+03  | 4.79E+03 |
| ENSG00000178498  | AGBL5        | 0.64 | -1.56 | -0.64 | 1.07E-07 | -4.77E+03 | 4.77E+03 |
| ENSG00000140403  | DTX3         | 0.63 | -1.59 | -0.67 | 1.12E-07 | -4.77E+03 | 4.77E+03 |
| ENSG00000163565  | DNAJA4       | 0.63 | -1.58 | -0.66 | 1.10E-07 | -4.75E+03 | 4.75E+03 |
| ENSG00000143401  | IFI16        | 1.62 | 1.62  | 0.70  | 1.18E-07 | 4.74E+03  | 4.74E+03 |
| ENSG00000133401  | ANP32E       | 0.65 | -1.54 | -0.62 | 1.07E-07 | -4.70E+03 | 4.70E+03 |
| ENSG00000164331  | PDZD2        | 1.97 | 1.97  | 0.98  | 1.76E-07 | 4.69E+03  | 4.69E+03 |
| ENSG00000183978  | ANKRA2       | 1.51 | 1.51  | 0.59  | 1.04E-07 | 4.69E+03  | 4.69E+03 |
| ENSG00000051180  | COA3         | 0.67 | -1.50 | -0.58 | 1.03E-07 | -4.68E+03 | 4.68E+03 |
| ENSG00000197183  | RAD51        | 0.65 | -1.55 | -0.63 | 1.11E-07 | -4.66E+03 | 4.66E+03 |
| ENSG00000221914  | C20orf112    | 1.64 | 1.64  | 0.72  | 1.24E-07 | 4.66E+03  | 4.66E+03 |
| ENSG00000158856  | PPP2R2A      | 1.53 | 1.53  | 0.61  | 1.09E-07 | 4.64E+03  | 4.64E+03 |
| ENSG00000177548  | EPB49        | 1.67 | 1.67  | 0.74  | 1.30E-07 | 4.64E+03  | 4.64E+03 |
| ENSG00000125901  | RABEP2       | 0.67 | -1.50 | -0.58 | 1.05E-07 | -4.62E+03 | 4.62E+03 |
| ENSG00000135451  | MRPS26       | 0.68 | -1.48 | -0.57 | 1.03E-07 | -4.61E+03 | 4.61E+03 |
| ENSG00000134686  | TROAP        | 0.65 | -1.53 | -0.62 | 1.11E-07 | -4.60E+03 | 4.60E+03 |
| ENSG00000111671  | PHC2         | 1.53 | 1.53  | 0.61  | 1.12E-07 | 4.56E+03  | 4.56E+03 |
| ENSG00000069275  | SPSB2        | 0.46 | -2.20 | -1.14 | 2.38E-07 | -4.50E+03 | 4.50E+03 |
| ENSG00000117305  | NUCKS1       | 0.66 | -1.52 | -0.60 | 1.14E-07 | -4.50E+03 | 4.50E+03 |
| ENSG00000183386  | HMGCL        | 1.51 | 1.51  | 0.59  | 1.13E-07 | 4.48E+03  | 4.48E+03 |
| ENSG00000177189  | FHL3         | 1.70 | 1.70  | 0.77  | 1.45E-07 | 4.47E+03  | 4.47E+03 |
| ENSG00000204392  | RPS6KA3      | 1.60 | 1.60  | 0.68  | 1.28E-07 | 4.46E+03  | 4.46E+03 |
| ENSG00000079435  | LSM2         | 0.68 | -1.48 | -0.57 | 1.11E-07 | -4.44E+03 | 4.44E+03 |
| ENSG00000170166  | LIPE         | 0.48 | -2.07 | -1.05 | 2.20E-07 | -4.42E+03 | 4.42E+03 |
| ENSG00000196646  | HOXD4        | 0.62 | -1.62 | -0.70 | 1.35E-07 | -4.42E+03 | 4.42E+03 |
| ENSG00000101096  | ZNF136       | 1.68 | 1.68  | 0.75  | 1.46E-07 | 4.39E+03  | 4.39E+03 |
| ENSG00000168701  | NFATC2       | 1.57 | 1.57  | 0.65  | 1.29E-07 | 4.36E+03  | 4.36E+03 |
| ENSG0000011231   | TMEM208      | 0.64 | -1.57 | -0.65 | 1.33E-07 | -4.30E+03 | 4.30E+03 |
| ENSG00000221869  | GPN3         | 0.68 | -1.47 | -0.56 | 1.18E-07 | -4.29E+03 | 4.29E+03 |
| ENSG00000130766  | RP11-329L6.1 | 0.40 | -2.50 | -1.32 | 3.45E-07 | -4.26E+03 | 4.26E+03 |
| ENSG00000198740  | CEBPD        | 0.56 | -1.79 | -0.84 | 1.77E-07 | -4.25E+03 | 4.25E+03 |
| ENSG00000180596  | ZMIZ2        | 1.61 | 1.61  | 0.69  | 1.45E-07 | 4.23E+03  | 4.23E+03 |
| ENSG00000092847  | SESN2        | 1.51 | 1.51  | 0.59  | 1.29E-07 | 4.20E+03  | 4.20E+03 |
| ENSG00000181222  | ZNF652       | 1.56 | 1.56  | 0.64  | 1.39E-07 | 4.19E+03  | 4.19E+03 |
| ENSG00000197785  | HIST1H2BC    | 0.64 | -1.57 | -0.65 | 1.42E-07 | -4.18E+03 | 4.18E+03 |
| ENSG00000151929  | EIF2C1       | 0.65 | -1.54 | -0.62 | 1.35E-07 | -4.18E+03 | 4.18E+03 |
| ENSG00000173611  | POLR2A       | 1.53 | 1.53  | 0.62  | 1.36E-07 | 4.16E+03  | 4.16E+03 |
| ENSG00000143476  | ATAD3A       | 0.67 | -1.50 | -0.58 | 1.31E-07 | -4.15E+03 | 4.15E+03 |
| ENSG00000239836  | BAG3         | 1.71 | 1.71  | 0.77  | 1.71E-07 | 4.13E+03  | 4.13E+03 |
| ENSG00000130559  | SCAI         | 0.59 | -1.70 | -0.77 | 1.70E-07 | -4.12E+03 | 4.12E+03 |
| ENSG00000066027  | DTL          | 0.67 | -1.49 | -0.58 | 1.32E-07 | -4.11E+03 | 4.11E+03 |
| ENSG00000109084  | PSMB9        | 0.54 | -1.86 | -0.90 | 2.08E-07 | -4.08E+03 | 4.08E+03 |
| ENSG00000179988  | CAMSAP1      | 1.53 | 1.53  | 0.61  | 1.41E-07 | 4.07E+03  | 4.07E+03 |
| ENSG00000169504  | PPP2R5A      | 1.52 | 1.52  | 0.60  | 1.40E-07 | 4.05E+03  | 4.05E+03 |
| ENSG00000162458  | TMEM97       | 0.67 | -1.49 | -0.57 | 1.35E-07 | -4.05E+03 | 4.05E+03 |
| ENSG00000070778  | PSTK         | 0.48 | -2.08 | -1.05 | 2.64E-07 | -4.05E+03 | 4.05E+03 |
| ENSG00000079616  | CLIC4        | 1.54 | 1.54  | 0.63  | 1.46E-07 | 4.04E+03  | 4.04E+03 |
| ENSG00000109775  | FB LIM1      | 1.54 | 1.54  | 0.63  | 1.46E-07 | 4.04E+03  | 4.04E+03 |
| ENSG00000180543  | PTPN21       | 1.52 | 1.52  | 0.61  | 1.43E-07 | 4.03E+03  | 4.03E+03 |
| ENSG00000082269  | KIF22        | 0.65 | -1.54 | -0.62 | 1.46E-07 | -4.02E+03 | 4.02E+03 |
| ENSG00000149930  | UFSP2        | 0.67 | -1.49 | -0.57 | 1.37E-07 | -4.02E+03 | 4.02E+03 |
| ENSG00000135736  | TSPYL5       | 1.50 | 1.50  | 0.59  | 1.39E-07 | 4.02E+03  | 4.02E+03 |
| ENSG00000129103  | FAM135A      | 1.67 | 1.67  | 0.74  | 1.74E-07 | 4.01E+03  | 4.01E+03 |
| ENSG00000168661  | TAOK2        | 1.51 | 1.51  | 0.60  | 1.45E-07 | 3.98E+03  | 3.98E+03 |
| ENSG00000197535  | CCDC102A     | 1.81 | 1.81  | 0.86  | 2.08E-07 | 3.97E+03  | 3.97E+03 |
| ENSG00000134470  | SUMF2        | 0.67 | -1.50 | -0.58 | 1.42E-07 | -3.96E+03 | 3.96E+03 |
| ENSG00000159199  | ZNF30        | 0.58 | -1.72 | -0.78 | 1.90E-07 | -3.95E+03 | 3.95E+03 |
| ENSG00000123415  | MYO5A        | 1.52 | 1.52  | 0.61  | 1.50E-07 | 3.94E+03  | 3.94E+03 |
| ENSG00000140450  | IL15RA       | 1.65 | 1.65  | 0.73  | 1.77E-07 | 3.93E+03  | 3.93E+03 |
| ENSG00000125510  | ATP5G1       | 0.66 | -1.52 | -0.60 | 1.49E-07 | -3.93E+03 | 3.93E+03 |
| ENSG00000204301  | SMUG1        | 0.64 | -1.56 | -0.64 | 1.58E-07 | -3.92E+03 | 3.92E+03 |
| ENSG00000197930  | ARRDC4       | 0.48 | -2.08 | -1.05 | 2.84E-07 | -3.90E+03 | 3.90E+03 |
| ENSG00000178502  | OPRL1        | 1.86 | 1.86  | 0.90  | 2.28E-07 | 3.90E+03  | 3.90E+03 |
| ENSG00000130204  | NOTCH4       | 0.67 | -1.48 | -0.57 | 1.46E-07 | -3.88E+03 | 3.88E+03 |
| ENSG0000018699   | ERO1L        | 1.52 | 1.52  | 0.61  | 1.56E-07 | 3.85E+03  | 3.85E+03 |
| ENSG00000130695  | KLHL11       | 0.65 | -1.53 | -0.61 | 1.57E-07 | -3.85E+03 | 3.85E+03 |
| ENSG00000169231  | TOMM40       | 0.67 | -1.49 | -0.57 | 1.50E-07 | -3.85E+03 | 3.85E+03 |
| ENSG00000196922  | TTC27        | 0.67 | -1.48 | -0.57 | 1.50E-07 | -3.83E+03 | 3.83E+03 |
| ENSG00000169231  | CEP85        | 0.68 | -1.48 | -0.56 | 1.49E-07 | -3.82E+03 | 3.82E+03 |
| ENSG00000196922  | THBS3        | 1.58 | 1.58  | 0.66  | 1.73E-07 | 3.81E+03  | 3.81E+03 |
| ENSG00000196922  | ZNF252P      | 1.48 | 1.48  | 0.56  | 1.53E-07 | 3.78E+03  | 3.78E+03 |

|                  |               |      |       |       |          |           |          |
|------------------|---------------|------|-------|-------|----------|-----------|----------|
| ENSG00000136205  | TNS3          | 1.78 | 1.78  | 0.83  | 2.22E-07 | 3.77E+03  | 3.77E+03 |
| ENSG00000129187  | DCTD          | 1.50 | 1.50  | 0.59  | 1.61E-07 | 3.74E+03  | 3.74E+03 |
| ENSG00000132383  | RPA1          | 0.61 | -1.65 | -0.72 | 1.95E-07 | -3.74E+03 | 3.74E+03 |
| ENSG00000262580  | RP11-334C17.5 | 2.14 | 2.14  | 1.10  | 3.32E-07 | 3.72E+03  | 3.72E+03 |
| ENSG00000182916  | TCEAL7        | 0.61 | -1.63 | -0.71 | 1.95E-07 | -3.70E+03 | 3.70E+03 |
| ENSG00000166250  | CLMP          | 0.54 | -1.86 | -0.90 | 2.55E-07 | -3.69E+03 | 3.69E+03 |
| ENSG00000140416  | TPM1          | 1.52 | 1.52  | 0.60  | 1.71E-07 | 3.67E+03  | 3.67E+03 |
| ENSG00000176105  | YES1          | 1.63 | 1.63  | 0.70  | 1.97E-07 | 3.66E+03  | 3.66E+03 |
| ENSG00000214367  | HAUS3         | 0.66 | -1.51 | -0.60 | 1.71E-07 | -3.66E+03 | 3.66E+03 |
| ENSG00000137822  | TUBGCP4       | 0.66 | -1.51 | -0.60 | 1.71E-07 | -3.66E+03 | 3.66E+03 |
| ENSG00000035862  | TIMP2         | 1.60 | 1.60  | 0.68  | 1.94E-07 | 3.64E+03  | 3.64E+03 |
| ENSG00000146083  | RNF44         | 1.62 | 1.62  | 0.70  | 1.99E-07 | 3.64E+03  | 3.64E+03 |
| ENSG00000134369  | NAV1          | 1.62 | 1.62  | 0.70  | 2.00E-07 | 3.62E+03  | 3.62E+03 |
| ENSG00000043093  | DCUN1D1       | 1.55 | 1.55  | 0.63  | 1.82E-07 | 3.62E+03  | 3.62E+03 |
| ENSG00000138085  | ATRAID        | 1.52 | 1.52  | 0.60  | 1.75E-07 | 3.62E+03  | 3.62E+03 |
| ENSG00000111846  | GCNT2         | 0.67 | -1.49 | -0.57 | 1.71E-07 | -3.60E+03 | 3.60E+03 |
| ENSG00000106714  | CNTNAP3       | 0.66 | -1.51 | -0.59 | 1.78E-07 | -3.58E+03 | 3.58E+03 |
| ENSG00000100558  | PLEK2         | 1.60 | 1.60  | 0.68  | 2.01E-07 | 3.58E+03  | 3.58E+03 |
| ENSG00000121858  | TNFSF10       | 0.61 | -1.64 | -0.72 | 2.11E-07 | -3.57E+03 | 3.57E+03 |
| ENSG00000150787  | PTS           | 0.65 | -1.54 | -0.63 | 1.87E-07 | -3.57E+03 | 3.57E+03 |
| ENSG000000087338 | GMCL1         | 0.67 | -1.48 | -0.57 | 1.74E-07 | -3.56E+03 | 3.56E+03 |
| ENSG00000134375  | TIMM17A       | 0.64 | -1.57 | -0.65 | 1.98E-07 | -3.53E+03 | 3.53E+03 |
| ENSG00000106789  | CORO2A        | 0.52 | -1.92 | -0.94 | 2.99E-07 | -3.51E+03 | 3.51E+03 |
| ENSG00000137601  | NEK1          | 1.67 | 1.67  | 0.74  | 2.27E-07 | 3.50E+03  | 3.50E+03 |
| ENSG00000110315  | RNF141        | 1.53 | 1.53  | 0.61  | 1.91E-07 | 3.49E+03  | 3.49E+03 |
| ENSG00000168256  | NKIRAS2       | 1.50 | 1.50  | 0.58  | 1.84E-07 | 3.49E+03  | 3.49E+03 |
| ENSG00000179454  | KLHL28        | 1.67 | 1.67  | 0.74  | 2.30E-07 | 3.48E+03  | 3.48E+03 |
| ENSG00000099800  | RP11-231E4.4  | 1.58 | 1.58  | 0.66  | 2.07E-07 | 3.48E+03  | 3.48E+03 |
| ENSG00000151012  | TIMM13        | 0.65 | -1.53 | -0.62 | 1.97E-07 | -3.45E+03 | 3.45E+03 |
| ENSG00000157110  | SLC7A11       | 1.69 | 1.69  | 0.76  | 2.41E-07 | 3.44E+03  | 3.44E+03 |
| ENSG00000006468  | RBPMS         | 1.57 | 1.57  | 0.65  | 2.08E-07 | 3.44E+03  | 3.44E+03 |
| ENSG00000173083  | ETV1          | 1.48 | 1.48  | 0.56  | 1.85E-07 | 3.43E+03  | 3.43E+03 |
| ENSG00000272551  | HPSE          | 0.64 | -1.56 | -0.64 | 2.07E-07 | -3.43E+03 | 3.43E+03 |
| ENSG00000160685  | AC017048.3    | 0.66 | -1.52 | -0.61 | 1.98E-07 | -3.42E+03 | 3.42E+03 |
| ENSG00000143228  | ZBTB7B        | 1.50 | 1.50  | 0.58  | 1.93E-07 | 3.42E+03  | 3.42E+03 |
| ENSG00000106049  | NUF2          | 0.64 | -1.56 | -0.64 | 2.09E-07 | -3.41E+03 | 3.41E+03 |
| ENSG00000134057  | HIBADH        | 0.68 | -1.47 | -0.55 | 1.88E-07 | -3.39E+03 | 3.39E+03 |
| ENSG00000168078  | CCNB1         | 0.65 | -1.55 | -0.63 | 2.09E-07 | -3.39E+03 | 3.39E+03 |
| ENSG00000171311  | PBK           | 0.64 | -1.55 | -0.63 | 2.11E-07 | -3.38E+03 | 3.38E+03 |
| ENSG00000102119  | EXOSC1        | 0.67 | -1.48 | -0.57 | 1.93E-07 | -3.38E+03 | 3.38E+03 |
| ENSG00000165806  | EMD           | 0.66 | -1.52 | -0.60 | 2.03E-07 | -3.37E+03 | 3.37E+03 |
| ENSG00000143158  | CASP7         | 1.51 | 1.51  | 0.60  | 2.05E-07 | 3.35E+03  | 3.35E+03 |
| ENSG00000181544  | MPC2          | 0.68 | -1.47 | -0.56 | 1.97E-07 | -3.32E+03 | 3.32E+03 |
| ENSG00000164327  | FANCB         | 0.59 | -1.68 | -0.75 | 2.60E-07 | -3.30E+03 | 3.30E+03 |
| ENSG00000078399  | RICTOR        | 1.99 | 1.99  | 0.99  | 3.63E-07 | 3.29E+03  | 3.29E+03 |
| ENSG00000173276  | HOXA9         | 0.67 | -1.49 | -0.58 | 2.06E-07 | -3.29E+03 | 3.29E+03 |
| ENSG00000101417  | ZNF295        | 1.51 | 1.51  | 0.60  | 2.13E-07 | 3.27E+03  | 3.27E+03 |
| ENSG00000060656  | PXMP4         | 0.58 | -1.73 | -0.79 | 2.82E-07 | -3.25E+03 | 3.25E+03 |
| ENSG00000153993  | PTPRU         | 1.90 | 1.90  | 0.93  | 3.43E-07 | 3.25E+03  | 3.25E+03 |
| ENSG00000197016  | SEMA3D        | 0.53 | -1.89 | -0.92 | 3.42E-07 | -3.23E+03 | 3.23E+03 |
| ENSG00000099992  | ZNF470        | 1.70 | 1.70  | 0.77  | 2.79E-07 | 3.23E+03  | 3.23E+03 |
| ENSG00000224877  | TBC1D10A      | 0.55 | -1.81 | -0.86 | 3.18E-07 | -3.21E+03 | 3.21E+03 |
| ENSG00000235863  | C17orf89      | 0.68 | -1.48 | -0.57 | 2.12E-07 | -3.21E+03 | 3.21E+03 |
| ENSG00000248890  | B3GALT4       | 0.48 | -2.08 | -1.05 | 4.19E-07 | -3.21E+03 | 3.21E+03 |
| ENSG00000004799  | HHIP-AS1      | 0.68 | -1.46 | -0.55 | 2.09E-07 | -3.20E+03 | 3.20E+03 |
| ENSG00000186522  | PDK4          | 0.56 | -1.78 | -0.83 | 3.11E-07 | -3.19E+03 | 3.19E+03 |
| ENSG00000125505  | SEPT10        | 1.54 | 1.54  | 0.62  | 2.33E-07 | 3.19E+03  | 3.19E+03 |
| ENSG00000164164  | MBOAT7        | 1.54 | 1.54  | 0.62  | 2.33E-07 | 3.19E+03  | 3.19E+03 |
| ENSG00000177873  | OTUD4         | 1.50 | 1.50  | 0.59  | 2.25E-07 | 3.17E+03  | 3.17E+03 |
| ENSG00000180354  | ZNF619        | 0.58 | -1.72 | -0.78 | 2.98E-07 | -3.14E+03 | 3.14E+03 |
| ENSG00000083844  | C7orf41       | 0.66 | -1.52 | -0.61 | 2.36E-07 | -3.13E+03 | 3.13E+03 |
| ENSG00000235823  | ZNF264        | 1.54 | 1.54  | 0.62  | 2.44E-07 | 3.11E+03  | 3.11E+03 |
| ENSG00000186994  | LINC00263     | 2.06 | 2.06  | 1.04  | 4.39E-07 | 3.11E+03  | 3.11E+03 |
| ENSG00000176912  | KANK3         | 1.49 | 1.49  | 0.57  | 2.31E-07 | 3.10E+03  | 3.10E+03 |
| ENSG00000140931  | C18orf56      | 1.89 | 1.89  | 0.92  | 3.74E-07 | 3.09E+03  | 3.09E+03 |
| ENSG00000108592  | CMTM3         | 1.51 | 1.51  | 0.60  | 2.41E-07 | 3.08E+03  | 3.08E+03 |
| ENSG00000145012  | FTSJ3         | 0.67 | -1.50 | -0.59 | 2.40E-07 | -3.07E+03 | 3.07E+03 |
| ENSG00000054148  | KIAA1107      | 1.97 | 1.97  | 0.98  | 4.13E-07 | 3.06E+03  | 3.06E+03 |
| ENSG00000078967  | LPP           | 1.51 | 1.51  | 0.59  | 2.43E-07 | 3.06E+03  | 3.06E+03 |
| ENSG00000058056  | PHPT1         | 0.68 | -1.48 | -0.56 | 2.34E-07 | -3.05E+03 | 3.05E+03 |
| ENSG00000054392  | UBE2D4        | 0.60 | -1.65 | -0.73 | 2.94E-07 | -3.05E+03 | 3.05E+03 |
| ENSG00000124370  | USP13         | 0.66 | -1.51 | -0.59 | 2.46E-07 | -3.04E+03 | 3.04E+03 |
| ENSG00000116667  | HHAT          | 1.82 | 1.82  | 0.87  | 3.60E-07 | 3.04E+03  | 3.04E+03 |
| ENSG00000187801  | MCEE          | 0.59 | -1.70 | -0.77 | 3.17E-07 | -3.03E+03 | 3.03E+03 |
| ENSG00000086544  | C1orf21       | 0.67 | -1.48 | -0.57 | 2.40E-07 | -3.02E+03 | 3.02E+03 |
| ENSG00000139190  | ZNF643        | 1.88 | 1.88  | 0.91  | 3.91E-07 | 3.00E+03  | 3.00E+03 |
| ENSG00000131470  | ITPKC         | 1.47 | 1.47  | 0.55  | 2.40E-07 | 2.99E+03  | 2.99E+03 |
|                  | VAMP1         | 0.52 | -1.92 | -0.94 | 4.19E-07 | -2.96E+03 | 2.96E+03 |
|                  | PSMC3IP       | 0.60 | -1.66 | -0.73 | 3.15E-07 | -2.95E+03 | 2.95E+03 |

|                  |             |      |       |       |          |           |          |
|------------------|-------------|------|-------|-------|----------|-----------|----------|
| ENSG00000149948  | HMGA2       | 0.66 | -1.51 | -0.59 | 2.65E-07 | -2.93E+03 | 2.93E+03 |
| ENSG00000115310  | RTN4        | 1.54 | 1.54  | 0.62  | 2.78E-07 | 2.92E+03  | 2.92E+03 |
| ENSG00000162910  | MRPL55      | 0.68 | -1.47 | -0.56 | 2.55E-07 | -2.92E+03 | 2.92E+03 |
| ENSG00000126461  | SCAF1       | 1.52 | 1.52  | 0.61  | 2.81E-07 | 2.87E+03  | 2.87E+03 |
| ENSG00000164010  | ERMAP       | 1.59 | 1.59  | 0.67  | 3.13E-07 | 2.84E+03  | 2.84E+03 |
| ENSG00000128928  | IVD         | 0.66 | -1.50 | -0.59 | 2.80E-07 | -2.84E+03 | 2.84E+03 |
| ENSG00000131732  | ZCCHC9      | 0.67 | -1.50 | -0.59 | 2.81E-07 | -2.83E+03 | 2.83E+03 |
| ENSG00000124802  | EEF1E1      | 0.66 | -1.50 | -0.59 | 2.84E-07 | -2.82E+03 | 2.82E+03 |
| ENSG00000077684  | PHF17       | 0.67 | -1.49 | -0.57 | 2.79E-07 | -2.82E+03 | 2.82E+03 |
| ENSG000000254470 | AP5B1       | 1.66 | 1.66  | 0.73  | 3.47E-07 | 2.82E+03  | 2.82E+03 |
| ENSG00000078177  | N4BP2       | 2.10 | 2.10  | 1.07  | 5.68E-07 | 2.79E+03  | 2.79E+03 |
| ENSG00000165060  | FXN         | 0.63 | -1.58 | -0.66 | 3.21E-07 | -2.78E+03 | 2.78E+03 |
| ENSG00000162227  | TAF6L       | 0.65 | -1.54 | -0.63 | 3.08E-07 | -2.78E+03 | 2.78E+03 |
| ENSG00000132274  | TRIM22      | 0.67 | -1.50 | -0.59 | 2.93E-07 | -2.78E+03 | 2.78E+03 |
| ENSG00000028310  | BRD9        | 0.68 | -1.46 | -0.55 | 2.78E-07 | -2.77E+03 | 2.77E+03 |
| ENSG00000162772  | ATF3        | 1.93 | 1.93  | 0.95  | 4.85E-07 | 2.77E+03  | 2.77E+03 |
| ENSG00000173898  | SPTBN2      | 1.49 | 1.49  | 0.57  | 2.91E-07 | 2.76E+03  | 2.76E+03 |
| ENSG00000277969  | CTB-58E17.1 | 2.26 | 2.26  | 1.17  | 6.70E-07 | 2.76E+03  | 2.76E+03 |
| ENSG00000119636  | CCDC176     | 1.99 | 1.99  | 0.99  | 5.25E-07 | 2.75E+03  | 2.75E+03 |
| ENSG00000157107  | FCHO2       | 1.55 | 1.55  | 0.63  | 3.18E-07 | 2.75E+03  | 2.75E+03 |
| ENSG00000142798  | HSPG2       | 1.53 | 1.53  | 0.61  | 3.11E-07 | 2.74E+03  | 2.74E+03 |
| ENSG00000165244  | ZNF367      | 0.67 | -1.49 | -0.58 | 3.01E-07 | -2.72E+03 | 2.72E+03 |
| ENSG00000176454  | LPCAT4      | 0.65 | -1.53 | -0.61 | 3.16E-07 | -2.72E+03 | 2.72E+03 |
| ENSG0000013016   | EHD3        | 0.61 | -1.64 | -0.71 | 3.62E-07 | -2.72E+03 | 2.72E+03 |
| ENSG00000167700  | MFSD3       | 0.61 | -1.63 | -0.70 | 3.61E-07 | -2.71E+03 | 2.71E+03 |
| ENSG00000178882  | FAM101A     | 0.65 | -1.55 | -0.63 | 3.26E-07 | -2.71E+03 | 2.71E+03 |
| ENSG00000174799  | CEP135      | 1.78 | 1.78  | 0.83  | 4.33E-07 | 2.71E+03  | 2.71E+03 |
| ENSG00000218510  | LINC00339   | 1.55 | 1.55  | 0.63  | 3.34E-07 | 2.68E+03  | 2.68E+03 |
| ENSG00000166012  | TAF1D       | 0.65 | -1.54 | -0.62 | 3.30E-07 | -2.68E+03 | 2.68E+03 |
| ENSG00000181026  | AEN         | 1.49 | 1.49  | 0.58  | 3.12E-07 | 2.67E+03  | 2.67E+03 |
| ENSG00000213186  | TRIM59      | 0.66 | -1.51 | -0.60 | 3.20E-07 | -2.67E+03 | 2.67E+03 |
| ENSG00000203805  | PPAPDC1A    | 1.50 | 1.50  | 0.59  | 3.17E-07 | 2.67E+03  | 2.67E+03 |
| ENSG00000125650  | PSPN        | 1.88 | 1.88  | 0.91  | 5.03E-07 | 2.65E+03  | 2.65E+03 |
| ENSG00000255112  | CHMP1B      | 1.49 | 1.49  | 0.57  | 3.15E-07 | 2.65E+03  | 2.65E+03 |
| ENSG00000127603  | MACF1       | 1.53 | 1.53  | 0.61  | 3.39E-07 | 2.63E+03  | 2.63E+03 |
| ENSG00000147526  | TACC1       | 1.51 | 1.51  | 0.59  | 3.42E-07 | 2.58E+03  | 2.58E+03 |
| ENSG00000198556  | ZNF789      | 0.63 | -1.60 | -0.68 | 3.87E-07 | -2.57E+03 | 2.57E+03 |
| ENSG00000182224  | CYB5D1      | 0.68 | -1.47 | -0.55 | 3.31E-07 | -2.55E+03 | 2.55E+03 |
| ENSG00000124257  | NEURL2      | 2.03 | 2.03  | 1.02  | 6.33E-07 | 2.55E+03  | 2.55E+03 |
| ENSG00000177337  | DLGAP1-AS1  | 1.55 | 1.55  | 0.64  | 3.76E-07 | 2.53E+03  | 2.53E+03 |
| ENSG00000198873  | GRK5        | 1.51 | 1.51  | 0.60  | 3.58E-07 | 2.53E+03  | 2.53E+03 |
| ENSG00000167543  | TP53I13     | 0.66 | -1.52 | -0.60 | 3.61E-07 | -2.52E+03 | 2.52E+03 |
| ENSG00000086065  | CHMP5       | 1.52 | 1.52  | 0.60  | 3.66E-07 | 2.51E+03  | 2.51E+03 |
| ENSG00000142494  | SLC47A1     | 0.60 | -1.68 | -0.75 | 4.54E-07 | -2.50E+03 | 2.50E+03 |
| ENSG00000049541  | RFC2        | 0.69 | -1.45 | -0.54 | 3.43E-07 | -2.48E+03 | 2.48E+03 |
| ENSG00000132356  | PRKAA1      | 0.67 | -1.50 | -0.59 | 3.67E-07 | -2.48E+03 | 2.48E+03 |
| ENSG00000181804  | SLC9A9      | 0.44 | -2.27 | -1.18 | 8.45E-07 | -2.47E+03 | 2.47E+03 |
| ENSG00000088826  | SMOX        | 1.49 | 1.49  | 0.58  | 3.66E-07 | 2.47E+03  | 2.47E+03 |
| ENSG00000174917  | C19orf70    | 0.68 | -1.47 | -0.55 | 3.54E-07 | -2.47E+03 | 2.47E+03 |
| ENSG00000113456  | RAD1        | 0.65 | -1.54 | -0.62 | 3.93E-07 | -2.46E+03 | 2.46E+03 |
| ENSG00000240682  | ISY1        | 0.65 | -1.54 | -0.62 | 3.94E-07 | -2.45E+03 | 2.45E+03 |
| ENSG00000144935  | TRPC1       | 1.51 | 1.51  | 0.59  | 3.78E-07 | 2.45E+03  | 2.45E+03 |
| ENSG00000168758  | SEMA4C      | 1.48 | 1.48  | 0.56  | 3.63E-07 | 2.45E+03  | 2.45E+03 |
| ENSG00000170525  | PFKFB3      | 1.48 | 1.48  | 0.57  | 3.75E-07 | 2.42E+03  | 2.42E+03 |
| ENSG00000205476  | CCDC85C     | 1.55 | 1.55  | 0.63  | 4.11E-07 | 2.42E+03  | 2.42E+03 |
| ENSG00000179958  | DCTPP1      | 0.66 | -1.52 | -0.60 | 3.95E-07 | -2.42E+03 | 2.42E+03 |
| ENSG00000198382  | UVRAG       | 1.49 | 1.49  | 0.58  | 3.87E-07 | 2.40E+03  | 2.40E+03 |
| ENSG00000115306  | SPTBN1      | 1.53 | 1.53  | 0.62  | 4.10E-07 | 2.39E+03  | 2.39E+03 |
| ENSG00000124216  | SNAI1       | 1.88 | 1.88  | 0.91  | 6.25E-07 | 2.38E+03  | 2.38E+03 |
| ENSG00000171320  | ESCO2       | 0.62 | -1.62 | -0.69 | 4.62E-07 | -2.38E+03 | 2.38E+03 |
| ENSG00000100151  | PICK1       | 0.65 | -1.55 | -0.63 | 4.26E-07 | -2.38E+03 | 2.38E+03 |
| ENSG00000159596  | TMEM69      | 0.69 | -1.45 | -0.54 | 3.79E-07 | -2.36E+03 | 2.36E+03 |
| ENSG00000137364  | TPMT        | 0.68 | -1.47 | -0.55 | 3.87E-07 | -2.36E+03 | 2.36E+03 |
| ENSG00000099977  | DDT         | 0.67 | -1.49 | -0.58 | 4.05E-07 | -2.35E+03 | 2.35E+03 |
| ENSG00000100320  | RBFOX2      | 1.50 | 1.50  | 0.58  | 4.08E-07 | 2.35E+03  | 2.35E+03 |
| ENSG00000130382  | CTC-503J8.6 | 0.67 | -1.50 | -0.59 | 4.12E-07 | -2.34E+03 | 2.34E+03 |
| ENSG00000167173  | C15orf39    | 1.62 | 1.62  | 0.70  | 4.83E-07 | 2.33E+03  | 2.33E+03 |
| ENSG00000174405  | LIG4        | 1.67 | 1.67  | 0.74  | 5.10E-07 | 2.33E+03  | 2.33E+03 |
| ENSG00000121486  | TRMT1L      | 1.51 | 1.51  | 0.59  | 4.22E-07 | 2.32E+03  | 2.32E+03 |
| ENSG00000166289  | PLEKHF1     | 1.61 | 1.61  | 0.69  | 4.82E-07 | 2.32E+03  | 2.32E+03 |
| ENSG00000099381  | SETD1A      | 1.58 | 1.58  | 0.66  | 4.62E-07 | 2.32E+03  | 2.32E+03 |
| ENSG00000172830  | SSH3        | 0.58 | -1.72 | -0.78 | 5.53E-07 | -2.31E+03 | 2.31E+03 |
| ENSG00000119514  | GALNT12     | 1.79 | 1.79  | 0.84  | 6.03E-07 | 2.31E+03  | 2.31E+03 |
| ENSG00000174307  | PHLDA3      | 1.47 | 1.47  | 0.56  | 4.09E-07 | 2.30E+03  | 2.30E+03 |
| ENSG00000136861  | CDK5RAP2    | 0.68 | -1.47 | -0.55 | 4.08E-07 | -2.30E+03 | 2.30E+03 |
| ENSG00000198001  | IRAK4       | 1.46 | 1.46  | 0.55  | 4.16E-07 | 2.27E+03  | 2.27E+03 |
| ENSG00000126243  | LRFN3       | 1.70 | 1.70  | 0.77  | 5.66E-07 | 2.26E+03  | 2.26E+03 |
| ENSG00000088280  | ASAP3       | 0.67 | -1.50 | -0.58 | 4.40E-07 | -2.25E+03 | 2.25E+03 |
| ENSG00000137955  | RABGGTB     | 0.66 | -1.51 | -0.60 | 4.54E-07 | -2.25E+03 | 2.25E+03 |

|                  |               |      |       |       |          |           |          |
|------------------|---------------|------|-------|-------|----------|-----------|----------|
| ENSG00000169718  | DUS1L         | 0.69 | -1.45 | -0.54 | 4.19E-07 | -2.24E+03 | 2.24E+03 |
| ENSG00000197860  | SGTB          | 1.45 | 1.45  | 0.54  | 4.26E-07 | 2.23E+03  | 2.23E+03 |
| ENSG00000148341  | SH3GLB2       | 0.67 | -1.50 | -0.59 | 4.55E-07 | -2.23E+03 | 2.23E+03 |
| ENSG00000164463  | CREBRF        | 1.72 | 1.72  | 0.78  | 5.99E-07 | 2.22E+03  | 2.22E+03 |
| ENSG00000173486  | FKBP2         | 0.67 | -1.48 | -0.57 | 4.46E-07 | -2.22E+03 | 2.22E+03 |
| ENSG00000152137  | HSPB8         | 1.51 | 1.51  | 0.59  | 4.72E-07 | 2.19E+03  | 2.19E+03 |
| ENSG00000062822  | POLD1         | 0.67 | -1.49 | -0.58 | 4.64E-07 | -2.19E+03 | 2.19E+03 |
| ENSG00000073536  | NLE1          | 0.66 | -1.51 | -0.60 | 4.77E-07 | -2.19E+03 | 2.19E+03 |
| ENSG00000137831  | UACA          | 1.73 | 1.73  | 0.79  | 6.30E-07 | 2.19E+03  | 2.19E+03 |
| ENSG00000135801  | TAF5L         | 0.69 | -1.45 | -0.54 | 4.43E-07 | -2.18E+03 | 2.18E+03 |
| ENSG00000067208  | EVI5          | 1.47 | 1.47  | 0.56  | 4.54E-07 | 2.18E+03  | 2.18E+03 |
| ENSG00000109906  | ZBTB16        | 0.59 | -1.71 | -0.77 | 6.15E-07 | -2.18E+03 | 2.18E+03 |
| ENSG00000127334  | DYRK2         | 1.45 | 1.45  | 0.53  | 4.42E-07 | 2.17E+03  | 2.17E+03 |
| ENSG00000055609  | MLL3          | 1.52 | 1.52  | 0.61  | 4.91E-07 | 2.17E+03  | 2.17E+03 |
| ENSG00000130702  | LAMA5         | 1.45 | 1.45  | 0.54  | 4.47E-07 | 2.17E+03  | 2.17E+03 |
| ENSG00000152939  | MARVELD2      | 0.62 | -1.62 | -0.70 | 5.58E-07 | -2.17E+03 | 2.17E+03 |
|                  | RP4-564F22.2  | 0.65 | -1.55 | -0.63 | 5.13E-07 | -2.16E+03 | 2.16E+03 |
| ENSG00000166401  | SERPIN8       | 0.69 | -1.45 | -0.54 | 4.54E-07 | -2.16E+03 | 2.16E+03 |
| ENSG00000008441  | NFIX          | 0.62 | -1.62 | -0.70 | 5.72E-07 | -2.14E+03 | 2.14E+03 |
| ENSG00000198056  | PRIM1         | 0.67 | -1.48 | -0.57 | 4.78E-07 | -2.14E+03 | 2.14E+03 |
| ENSG00000179091  | CYC1          | 0.67 | -1.50 | -0.59 | 4.95E-07 | -2.13E+03 | 2.13E+03 |
| ENSG00000133131  | MORC4         | 0.66 | -1.51 | -0.60 | 5.07E-07 | -2.13E+03 | 2.13E+03 |
| ENSG00000146063  | TRIM41        | 1.50 | 1.50  | 0.59  | 5.02E-07 | 2.12E+03  | 2.12E+03 |
| ENSG00000090266  | NDUFB2        | 0.63 | -1.58 | -0.66 | 5.54E-07 | -2.12E+03 | 2.12E+03 |
| ENSG00000167716  | WDR81         | 1.51 | 1.51  | 0.59  | 5.11E-07 | 2.11E+03  | 2.11E+03 |
| ENSG00000095383  | TBC1D2        | 1.66 | 1.66  | 0.73  | 6.26E-07 | 2.10E+03  | 2.10E+03 |
| ENSG00000146828  | SLC12A9       | 0.68 | -1.46 | -0.55 | 4.88E-07 | -2.09E+03 | 2.09E+03 |
| ENSG00000146223  | RPL7L1        | 0.67 | -1.49 | -0.57 | 5.07E-07 | -2.09E+03 | 2.09E+03 |
| ENSG00000111110  | PPM1H         | 1.87 | 1.87  | 0.90  | 8.04E-07 | 2.08E+03  | 2.08E+03 |
| ENSG00000099385  | BCL7C         | 0.69 | -1.46 | -0.54 | 5.01E-07 | -2.06E+03 | 2.06E+03 |
| ENSG00000113369  | ARRDC3        | 1.51 | 1.51  | 0.59  | 5.38E-07 | 2.06E+03  | 2.06E+03 |
| ENSG00000184208  | C22orf46      | 2.03 | 2.03  | 1.02  | 9.83E-07 | 2.05E+03  | 2.05E+03 |
| ENSG00000100368  | CSF2RB        | 0.69 | -1.45 | -0.53 | 5.00E-07 | -2.05E+03 | 2.05E+03 |
| ENSG00000267194  | RP1-193H18.2  | 0.54 | -1.86 | -0.90 | 8.28E-07 | -2.04E+03 | 2.04E+03 |
| ENSG00000179820  | MYADM         | 1.45 | 1.45  | 0.53  | 5.02E-07 | 2.04E+03  | 2.04E+03 |
| ENSG00000151693  | ASAP2         | 1.49 | 1.49  | 0.58  | 5.40E-07 | 2.03E+03  | 2.03E+03 |
| ENSG00000165046  | LETM2         | 1.57 | 1.57  | 0.65  | 6.00E-07 | 2.03E+03  | 2.03E+03 |
| ENSG00000255517  | CTD-3074O7.5  | 1.93 | 1.93  | 0.95  | 9.19E-07 | 2.02E+03  | 2.02E+03 |
| ENSG00000070759  | TESK2         | 0.48 | -2.06 | -1.05 | 1.08E-06 | -1.99E+03 | 1.99E+03 |
| ENSG00000107968  | MAP3K8        | 0.53 | -1.89 | -0.92 | 9.10E-07 | -1.98E+03 | 1.98E+03 |
| ENSG00000257261  | RP11-96H19.1  | 2.52 | 2.52  | 1.33  | 1.70E-06 | 1.93E+03  | 1.93E+03 |
| ENSG00000006625  | GGCT          | 0.69 | -1.44 | -0.53 | 5.58E-07 | -1.93E+03 | 1.93E+03 |
| ENSG00000228716  | DHFR          | 0.66 | -1.51 | -0.59 | 6.16E-07 | -1.92E+03 | 1.92E+03 |
| ENSG00000162086  | ZNF75A        | 1.51 | 1.51  | 0.60  | 6.21E-07 | 1.92E+03  | 1.92E+03 |
| ENSG00000249867  | RP11-115J23.1 | 0.53 | -1.89 | -0.92 | 9.77E-07 | -1.92E+03 | 1.92E+03 |
| ENSG00000160214  | RRP1          | 0.69 | -1.44 | -0.53 | 5.68E-07 | -1.91E+03 | 1.91E+03 |
| ENSG00000133863  | TEX15         | 0.50 | -1.98 | -0.99 | 1.09E-06 | -1.90E+03 | 1.90E+03 |
| ENSG00000106244  | PDAP1         | 0.65 | -1.53 | -0.61 | 6.55E-07 | -1.89E+03 | 1.89E+03 |
| ENSG00000167721  | TSR1          | 0.67 | -1.50 | -0.59 | 6.33E-07 | -1.89E+03 | 1.89E+03 |
| ENSG00000135048  | TMEM2         | 1.51 | 1.51  | 0.59  | 6.41E-07 | 1.88E+03  | 1.88E+03 |
| ENSG00000162430  | SEPN1         | 1.49 | 1.49  | 0.58  | 6.33E-07 | 1.88E+03  | 1.88E+03 |
| ENSG00000115425  | PECR          | 0.62 | -1.61 | -0.68 | 7.45E-07 | -1.86E+03 | 1.86E+03 |
| ENSG00000178425  | NT5DC1        | 0.69 | -1.45 | -0.54 | 6.09E-07 | -1.86E+03 | 1.86E+03 |
| ENSG00000107438  | PDLIM1        | 0.66 | -1.51 | -0.60 | 6.61E-07 | -1.86E+03 | 1.86E+03 |
| ENSG00000161243  | FBXO27        | 0.49 | -2.05 | -1.04 | 1.22E-06 | -1.86E+03 | 1.86E+03 |
| ENSG00000188295  | ZNF669        | 1.56 | 1.56  | 0.65  | 7.12E-07 | 1.86E+03  | 1.86E+03 |
| ENSG00000152782  | PANK1         | 0.62 | -1.62 | -0.69 | 7.64E-07 | -1.85E+03 | 1.85E+03 |
| ENSG00000126804  | ZBTB1         | 1.47 | 1.47  | 0.56  | 6.39E-07 | 1.84E+03  | 1.84E+03 |
| ENSG00000175768  | TOMM5         | 0.57 | -1.75 | -0.81 | 9.07E-07 | -1.84E+03 | 1.84E+03 |
| ENSG00000175104  | TRAF6         | 1.50 | 1.50  | 0.59  | 6.74E-07 | 1.83E+03  | 1.83E+03 |
| ENSG00000102984  | ZNF821        | 1.63 | 1.63  | 0.70  | 7.91E-07 | 1.83E+03  | 1.83E+03 |
| ENSG00000187605  | TET3          | 1.69 | 1.69  | 0.76  | 8.59E-07 | 1.83E+03  | 1.83E+03 |
| ENSG00000114268  | PFKFB4        | 0.55 | -1.81 | -0.86 | 9.92E-07 | -1.82E+03 | 1.82E+03 |
| ENSG00000164967  | RPP25L        | 0.63 | -1.60 | -0.67 | 7.71E-07 | -1.82E+03 | 1.82E+03 |
| ENSG00000145244  | CORIN         | 0.31 | -3.23 | -1.69 | 3.17E-06 | -1.82E+03 | 1.82E+03 |
| ENSG00000128591  | FLNC          | 1.62 | 1.62  | 0.70  | 7.97E-07 | 1.81E+03  | 1.81E+03 |
| ENSG00000143776  | CDC42BPA      | 1.50 | 1.50  | 0.58  | 6.83E-07 | 1.81E+03  | 1.81E+03 |
| ENSG00000133704  | IPO8          | 0.68 | -1.47 | -0.55 | 6.58E-07 | -1.81E+03 | 1.81E+03 |
| ENSG000000043143 | PHF15         | 1.44 | 1.44  | 0.53  | 6.38E-07 | 1.80E+03  | 1.80E+03 |
| ENSG00000131788  | PIAS3         | 0.66 | -1.51 | -0.59 | 7.01E-07 | -1.80E+03 | 1.80E+03 |
| ENSG00000172985  | SH3RF3        | 1.59 | 1.59  | 0.67  | 7.83E-07 | 1.79E+03  | 1.79E+03 |
| ENSG00000143409  | FAM63A        | 0.63 | -1.59 | -0.67 | 7.87E-07 | -1.79E+03 | 1.79E+03 |
| ENSG00000168172  | HOOK3         | 1.46 | 1.46  | 0.54  | 6.69E-07 | 1.78E+03  | 1.78E+03 |
| ENSG00000184207  | PGP           | 0.68 | -1.47 | -0.55 | 6.83E-07 | -1.78E+03 | 1.78E+03 |
| ENSG00000197024  | ZNF398        | 1.48 | 1.48  | 0.57  | 6.94E-07 | 1.78E+03  | 1.78E+03 |
| ENSG00000182054  | IDH2          | 0.68 | -1.47 | -0.55 | 6.84E-07 | -1.77E+03 | 1.77E+03 |
| ENSG00000177192  | PUS1          | 0.67 | -1.50 | -0.59 | 7.23E-07 | -1.76E+03 | 1.76E+03 |
| ENSG00000108474  | PIGL          | 0.65 | -1.53 | -0.62 | 7.66E-07 | -1.75E+03 | 1.75E+03 |
| ENSG00000089157  | RPLP0         | 0.67 | -1.48 | -0.57 | 7.17E-07 | -1.75E+03 | 1.75E+03 |

|                 |               |      |       |       |          |           |          |
|-----------------|---------------|------|-------|-------|----------|-----------|----------|
| ENSG00000152253 | SPC25         | 0.66 | -1.52 | -0.60 | 7.52E-07 | -1.75E+03 | 1.75E+03 |
| ENSG00000166341 | DCHS1         | 1.67 | 1.67  | 0.74  | 9.13E-07 | 1.75E+03  | 1.75E+03 |
| ENSG00000081923 | ATP8B1        | 1.47 | 1.47  | 0.56  | 7.19E-07 | 1.74E+03  | 1.74E+03 |
| ENSG00000237649 | KIFC1         | 0.67 | -1.50 | -0.59 | 7.45E-07 | -1.74E+03 | 1.74E+03 |
| ENSG00000241685 | ARPC1A        | 1.48 | 1.48  | 0.57  | 7.30E-07 | 1.73E+03  | 1.73E+03 |
| ENSG00000070614 | NDST1         | 1.47 | 1.47  | 0.56  | 7.31E-07 | 1.72E+03  | 1.72E+03 |
| ENSG00000125898 | FAM110A       | 1.90 | 1.90  | 0.93  | 1.23E-06 | 1.71E+03  | 1.71E+03 |
| ENSG00000006282 | SPATA20       | 1.48 | 1.48  | 0.57  | 7.62E-07 | 1.70E+03  | 1.70E+03 |
| ENSG00000247950 | SEC24B-AS1    | 1.89 | 1.89  | 0.92  | 1.23E-06 | 1.70E+03  | 1.70E+03 |
| ENSG00000100393 | EP300         | 1.60 | 1.60  | 0.68  | 8.88E-07 | 1.70E+03  | 1.70E+03 |
| ENSG00000102103 | PQBP1         | 0.67 | -1.50 | -0.59 | 7.87E-07 | -1.69E+03 | 1.69E+03 |
| ENSG00000165724 | ZMYND19       | 0.68 | -1.47 | -0.56 | 7.58E-07 | -1.69E+03 | 1.69E+03 |
| ENSG00000156113 | KCNMA1        | 2.06 | 2.06  | 1.04  | 1.49E-06 | 1.69E+03  | 1.69E+03 |
| ENSG00000128590 | DNAJB9        | 0.67 | -1.49 | -0.57 | 7.75E-07 | -1.69E+03 | 1.69E+03 |
| ENSG00000138434 | SSFA2         | 1.48 | 1.48  | 0.57  | 7.77E-07 | 1.68E+03  | 1.68E+03 |
| ENSG00000267002 | RP11-242D8.1  | 2.11 | 2.11  | 1.07  | 1.60E-06 | 1.66E+03  | 1.66E+03 |
| ENSG00000168303 | MPLKIP        | 0.66 | -1.51 | -0.60 | 8.33E-07 | -1.66E+03 | 1.66E+03 |
| ENSG00000198075 | SULT1C4       | 0.56 | -1.77 | -0.83 | 1.15E-06 | -1.65E+03 | 1.65E+03 |
| ENSG00000180346 | TIGD2         | 0.61 | -1.65 | -0.72 | 1.01E-06 | -1.65E+03 | 1.65E+03 |
| ENSG00000148229 | POLE3         | 0.68 | -1.46 | -0.55 | 7.97E-07 | -1.64E+03 | 1.64E+03 |
| ENSG00000111669 | TPI1          | 0.67 | -1.48 | -0.57 | 8.26E-07 | -1.63E+03 | 1.63E+03 |
| ENSG00000167799 | NUDT8         | 0.55 | -1.82 | -0.86 | 1.25E-06 | -1.63E+03 | 1.63E+03 |
| ENSG00000115109 | EPB41L5       | 0.68 | -1.48 | -0.56 | 8.24E-07 | -1.63E+03 | 1.63E+03 |
| ENSG00000126456 | IRF3          | 0.68 | -1.46 | -0.55 | 8.06E-07 | -1.63E+03 | 1.63E+03 |
| ENSG00000266173 | STRADA        | 0.54 | -1.84 | -0.88 | 1.28E-06 | -1.63E+03 | 1.63E+03 |
| ENSG00000161647 | MPP3          | 0.60 | -1.65 | -0.73 | 1.04E-06 | -1.63E+03 | 1.63E+03 |
| ENSG00000231074 | HCG18         | 0.68 | -1.47 | -0.56 | 8.35E-07 | -1.61E+03 | 1.61E+03 |
| ENSG00000114686 | MRPL3         | 0.68 | -1.46 | -0.55 | 8.20E-07 | -1.61E+03 | 1.61E+03 |
|                 | AC108488.3    | 1.57 | 1.57  | 0.65  | 9.50E-07 | 1.61E+03  | 1.61E+03 |
| ENSG00000187244 | BCAM          | 0.51 | -1.97 | -0.98 | 1.50E-06 | -1.61E+03 | 1.61E+03 |
| ENSG00000173166 | RAPH1         | 0.68 | -1.46 | -0.55 | 8.26E-07 | -1.61E+03 | 1.61E+03 |
| ENSG00000145687 | SSBP2         | 0.66 | -1.51 | -0.59 | 8.84E-07 | -1.61E+03 | 1.61E+03 |
| ENSG00000147155 | EBP           | 0.68 | -1.47 | -0.55 | 8.38E-07 | -1.60E+03 | 1.60E+03 |
| ENSG00000102871 | TRADD         | 0.64 | -1.55 | -0.64 | 9.41E-07 | -1.60E+03 | 1.60E+03 |
| ENSG00000066322 | ELOVL1        | 1.48 | 1.48  | 0.56  | 8.61E-07 | 1.59E+03  | 1.59E+03 |
| ENSG00000198833 | UBE2J1        | 1.52 | 1.52  | 0.61  | 9.22E-07 | 1.59E+03  | 1.59E+03 |
| ENSG00000234546 | RP3-510D11.2  | 2.18 | 2.18  | 1.12  | 1.89E-06 | 1.58E+03  | 1.58E+03 |
| ENSG00000198826 | ARHGAP11A     | 0.61 | -1.64 | -0.72 | 1.08E-06 | -1.58E+03 | 1.58E+03 |
| ENSG00000168159 | RNF187        | 1.49 | 1.49  | 0.57  | 8.81E-07 | 1.58E+03  | 1.58E+03 |
| ENSG00000223496 | EXOSC6        | 0.69 | -1.45 | -0.53 | 8.36E-07 | -1.58E+03 | 1.58E+03 |
| ENSG00000162337 | LRP5          | 1.47 | 1.47  | 0.55  | 8.62E-07 | 1.58E+03  | 1.58E+03 |
| ENSG00000139428 | MMAB          | 0.69 | -1.46 | -0.54 | 8.58E-07 | -1.57E+03 | 1.57E+03 |
| ENSG00000276293 | PIP4K2B       | 0.68 | -1.46 | -0.55 | 8.67E-07 | -1.57E+03 | 1.57E+03 |
| ENSG00000153956 | CACNA2D1      | 1.88 | 1.88  | 0.91  | 1.44E-06 | 1.57E+03  | 1.57E+03 |
| ENSG00000149182 | ARFGAP2       | 0.69 | -1.46 | -0.54 | 8.66E-07 | -1.56E+03 | 1.56E+03 |
| ENSG00000135473 | PAN2          | 1.55 | 1.55  | 0.63  | 9.93E-07 | 1.56E+03  | 1.56E+03 |
| ENSG00000232164 | AC092669.3    | 1.76 | 1.76  | 0.81  | 1.28E-06 | 1.55E+03  | 1.55E+03 |
| ENSG00000196628 | TCF4          | 1.57 | 1.57  | 0.65  | 1.04E-06 | 1.54E+03  | 1.54E+03 |
| ENSG00000070950 | RAD18         | 0.67 | -1.48 | -0.57 | 9.26E-07 | -1.54E+03 | 1.54E+03 |
|                 | RP11-382A18.1 | 2.15 | 2.15  | 1.10  | 1.96E-06 | 1.53E+03  | 1.53E+03 |
| ENSG00000177374 | HIC1          | 1.48 | 1.48  | 0.57  | 9.39E-07 | 1.53E+03  | 1.53E+03 |
| ENSG00000197312 | DDI2          | 1.54 | 1.54  | 0.62  | 1.01E-06 | 1.53E+03  | 1.53E+03 |
| ENSG00000174775 | HRAS          | 1.45 | 1.45  | 0.53  | 8.94E-07 | 1.53E+03  | 1.53E+03 |
| ENSG00000157426 | AASDH         | 0.67 | -1.49 | -0.57 | 9.48E-07 | -1.53E+03 | 1.53E+03 |
| ENSG00000204262 | COL5A2        | 0.67 | -1.48 | -0.57 | 9.44E-07 | -1.53E+03 | 1.53E+03 |
| ENSG00000254726 | MEX3A         | 1.62 | 1.62  | 0.69  | 1.12E-06 | 1.53E+03  | 1.53E+03 |
| ENSG00000166900 | STX3          | 1.45 | 1.45  | 0.54  | 9.10E-07 | 1.52E+03  | 1.52E+03 |
| ENSG00000168843 | FSTL5         | 0.58 | -1.74 | -0.80 | 1.32E-06 | -1.51E+03 | 1.51E+03 |
| ENSG00000176444 | CLK2          | 0.69 | -1.45 | -0.54 | 9.25E-07 | -1.51E+03 | 1.51E+03 |
| ENSG00000186866 | POFUT2        | 1.44 | 1.44  | 0.53  | 9.13E-07 | 1.51E+03  | 1.51E+03 |
| ENSG00000181038 | METTL23       | 0.64 | -1.57 | -0.65 | 1.09E-06 | -1.50E+03 | 1.50E+03 |
| ENSG00000148835 | TAF5          | 0.68 | -1.46 | -0.55 | 9.48E-07 | -1.50E+03 | 1.50E+03 |
| ENSG00000158286 | RNF207        | 0.50 | -2.01 | -1.01 | 1.80E-06 | -1.50E+03 | 1.50E+03 |
| ENSG00000111817 | DSE           | 0.68 | -1.46 | -0.55 | 9.54E-07 | -1.50E+03 | 1.50E+03 |
| ENSG00000101246 | ARFRP1        | 0.70 | -1.44 | -0.52 | 9.45E-07 | -1.48E+03 | 1.48E+03 |
| ENSG00000227051 | C14orf132     | 0.60 | -1.67 | -0.74 | 1.28E-06 | -1.48E+03 | 1.48E+03 |
| ENSG00000213123 | TCTEX1D2      | 1.59 | 1.59  | 0.67  | 1.17E-06 | 1.47E+03  | 1.47E+03 |
| ENSG00000150457 | LATS2         | 1.46 | 1.46  | 0.55  | 9.91E-07 | 1.47E+03  | 1.47E+03 |
| ENSG00000166311 | SMPD1         | 1.60 | 1.60  | 0.68  | 1.19E-06 | 1.47E+03  | 1.47E+03 |
| ENSG00000158163 | DZIP1L        | 0.53 | -1.90 | -0.93 | 1.68E-06 | -1.46E+03 | 1.46E+03 |
| ENSG00000161558 | TMEM143       | 2.00 | 2.00  | 1.00  | 1.86E-06 | 1.46E+03  | 1.46E+03 |
| ENSG00000125520 | SLC2A4RG      | 0.69 | -1.45 | -0.54 | 9.95E-07 | -1.46E+03 | 1.46E+03 |
| ENSG00000142627 | EPHA2         | 1.65 | 1.65  | 0.72  | 1.28E-06 | 1.45E+03  | 1.45E+03 |
|                 | RP11-322M19.2 | 2.00 | 2.00  | 1.00  | 1.92E-06 | 1.44E+03  | 1.44E+03 |
| ENSG00000134815 | DHX34         | 1.47 | 1.47  | 0.56  | 1.05E-06 | 1.44E+03  | 1.44E+03 |
| ENSG00000110711 | AIP           | 0.70 | -1.43 | -0.52 | 9.97E-07 | -1.43E+03 | 1.43E+03 |
| ENSG00000170312 | CDK1          | 0.66 | -1.50 | -0.59 | 1.10E-06 | -1.43E+03 | 1.43E+03 |
| ENSG00000089876 | DHX32         | 1.46 | 1.46  | 0.55  | 1.06E-06 | 1.42E+03  | 1.42E+03 |
| ENSG00000100311 | PDGFB         | 1.51 | 1.51  | 0.59  | 1.13E-06 | 1.42E+03  | 1.42E+03 |

|                 |              |      |       |       |          |           |          |
|-----------------|--------------|------|-------|-------|----------|-----------|----------|
| ENSG00000120925 | RNF170       | 1.46 | 1.46  | 0.54  | 1.06E-06 | 1.42E+03  | 1.42E+03 |
| ENSG00000100485 | SOS2         | 1.45 | 1.45  | 0.53  | 1.04E-06 | 1.42E+03  | 1.42E+03 |
| ENSG00000107485 | GATA3        | 1.78 | 1.78  | 0.83  | 1.60E-06 | 1.41E+03  | 1.41E+03 |
| ENSG00000090581 | GNPTG        | 0.67 | -1.48 | -0.57 | 1.12E-06 | -1.40E+03 | 1.40E+03 |
| ENSG00000165494 | PCF11        | 1.50 | 1.50  | 0.59  | 1.15E-06 | 1.40E+03  | 1.40E+03 |
| ENSG00000124243 | BCAS4        | 0.51 | -1.96 | -0.97 | 1.96E-06 | -1.40E+03 | 1.40E+03 |
| ENSG00000140382 | HMG20A       | 1.47 | 1.47  | 0.56  | 1.11E-06 | 1.40E+03  | 1.40E+03 |
| ENSG00000188343 | FAM92A1      | 0.70 | -1.44 | -0.52 | 1.06E-06 | -1.40E+03 | 1.40E+03 |
| ENSG00000101079 | NDRG3        | 0.69 | -1.44 | -0.53 | 1.07E-06 | -1.40E+03 | 1.40E+03 |
| ENSG00000198858 | R3HDM4       | 1.44 | 1.44  | 0.53  | 1.08E-06 | 1.39E+03  | 1.39E+03 |
| ENSG00000180530 | NRIP1        | 1.96 | 1.96  | 0.97  | 1.98E-06 | 1.39E+03  | 1.39E+03 |
| ENSG00000108798 | ABI3         | 0.66 | -1.51 | -0.60 | 1.19E-06 | -1.38E+03 | 1.38E+03 |
| ENSG00000226950 | DANCR        | 0.69 | -1.44 | -0.53 | 1.09E-06 | -1.38E+03 | 1.38E+03 |
| ENSG00000107625 | DDX50        | 0.70 | -1.44 | -0.52 | 1.08E-06 | -1.38E+03 | 1.38E+03 |
| ENSG00000112137 | PHACTR1      | 1.69 | 1.69  | 0.76  | 1.51E-06 | 1.38E+03  | 1.38E+03 |
| ENSG00000185728 | YTHDF3       | 1.50 | 1.50  | 0.59  | 1.19E-06 | 1.38E+03  | 1.38E+03 |
| ENSG00000130856 | ZNF236       | 1.43 | 1.43  | 0.51  | 1.07E-06 | 1.38E+03  | 1.38E+03 |
| ENSG00000112245 | PTP4A1       | 1.50 | 1.50  | 0.58  | 1.19E-06 | 1.37E+03  | 1.37E+03 |
| ENSG00000163947 | ARHGEF3      | 1.44 | 1.44  | 0.53  | 1.11E-06 | 1.37E+03  | 1.37E+03 |
| ENSG00000150779 | TIMM8B       | 0.68 | -1.46 | -0.55 | 1.15E-06 | -1.36E+03 | 1.36E+03 |
| ENSG00000251379 | RP11-484O2.1 | 2.26 | 2.26  | 1.18  | 2.78E-06 | 1.36E+03  | 1.36E+03 |
| ENSG00000131069 | ACSS2        | 0.70 | -1.43 | -0.52 | 1.14E-06 | -1.34E+03 | 1.34E+03 |
| ENSG00000171435 | KSR2         | 1.67 | 1.67  | 0.74  | 1.56E-06 | 1.34E+03  | 1.34E+03 |
| ENSG00000133256 | PDE6B        | 1.72 | 1.72  | 0.78  | 1.65E-06 | 1.34E+03  | 1.34E+03 |
| ENSG00000142687 | KIAA0319L    | 1.45 | 1.45  | 0.54  | 1.18E-06 | 1.34E+03  | 1.34E+03 |
| ENSG00000137133 | HINT2        | 1.50 | 1.50  | 0.59  | 1.26E-06 | 1.34E+03  | 1.34E+03 |
| ENSG00000198912 | C1orf174     | 0.70 | -1.44 | -0.52 | 1.16E-06 | -1.33E+03 | 1.33E+03 |
| ENSG00000146147 | MLIP         | 0.64 | -1.57 | -0.65 | 1.38E-06 | -1.33E+03 | 1.33E+03 |
| ENSG00000115556 | PLCD4        | 0.54 | -1.86 | -0.90 | 1.96E-06 | -1.33E+03 | 1.33E+03 |
| ENSG00000126705 | AHDC1        | 1.66 | 1.66  | 0.73  | 1.55E-06 | 1.33E+03  | 1.33E+03 |
| ENSG00000244701 | RP5-894A10.2 | 1.89 | 1.89  | 0.92  | 2.03E-06 | 1.33E+03  | 1.33E+03 |
| ENSG00000179598 | PLD6         | 0.50 | -2.01 | -1.01 | 2.32E-06 | -1.32E+03 | 1.32E+03 |
| ENSG00000176845 | METRNL       | 1.50 | 1.50  | 0.59  | 1.31E-06 | 1.31E+03  | 1.31E+03 |
| ENSG00000120253 | NUP43        | 0.68 | -1.47 | -0.55 | 1.25E-06 | -1.31E+03 | 1.31E+03 |
| ENSG00000162889 | MAPKAPK2     | 1.48 | 1.48  | 0.56  | 1.27E-06 | 1.31E+03  | 1.31E+03 |
| ENSG00000165716 | FAM69B       | 0.68 | -1.47 | -0.55 | 1.25E-06 | -1.31E+03 | 1.31E+03 |
| ENSG00000197714 | ZNF460       | 1.45 | 1.45  | 0.54  | 1.25E-06 | 1.30E+03  | 1.30E+03 |
| ENSG00000143815 | LBR          | 0.68 | -1.47 | -0.56 | 1.28E-06 | -1.30E+03 | 1.30E+03 |
| ENSG00000137171 | KLC4         | 1.49 | 1.49  | 0.58  | 1.33E-06 | 1.29E+03  | 1.29E+03 |
| ENSG00000178980 | SEPW1        | 0.67 | -1.49 | -0.57 | 1.32E-06 | -1.29E+03 | 1.29E+03 |
| ENSG00000101452 | DHX35        | 0.68 | -1.47 | -0.56 | 1.31E-06 | -1.29E+03 | 1.29E+03 |
| ENSG00000197724 | PHF2         | 0.65 | -1.53 | -0.61 | 1.41E-06 | -1.28E+03 | 1.28E+03 |
| ENSG00000120333 | MRPS14       | 0.70 | -1.43 | -0.51 | 1.26E-06 | -1.27E+03 | 1.27E+03 |
| ENSG00000204220 | PFDN6        | 0.67 | -1.49 | -0.58 | 1.37E-06 | -1.27E+03 | 1.27E+03 |
| ENSG00000116604 | MEF2D        | 1.54 | 1.54  | 0.62  | 1.47E-06 | 1.27E+03  | 1.27E+03 |
| ENSG00000007968 | E2F2         | 0.59 | -1.71 | -0.77 | 1.80E-06 | -1.27E+03 | 1.27E+03 |
| ENSG00000178038 | ALS2CL       | 1.59 | 1.59  | 0.67  | 1.60E-06 | 1.26E+03  | 1.26E+03 |
| ENSG00000235501 | RP4-639F20.1 | 1.91 | 1.91  | 0.93  | 2.31E-06 | 1.26E+03  | 1.26E+03 |
| ENSG00000167107 | ACSF2        | 0.67 | -1.49 | -0.57 | 1.41E-06 | -1.25E+03 | 1.25E+03 |
| ENSG00000173548 | SNX33        | 1.43 | 1.43  | 0.52  | 1.32E-06 | 1.25E+03  | 1.25E+03 |
| ENSG00000142599 | RERE         | 1.47 | 1.47  | 0.55  | 1.38E-06 | 1.25E+03  | 1.25E+03 |
| ENSG00000118689 | FOXO3        | 1.45 | 1.45  | 0.53  | 1.36E-06 | 1.24E+03  | 1.24E+03 |
| ENSG00000101311 | FERMT1       | 0.52 | -1.94 | -0.95 | 2.44E-06 | -1.24E+03 | 1.24E+03 |
| ENSG00000071894 | CPSF1        | 0.69 | -1.45 | -0.54 | 1.39E-06 | -1.23E+03 | 1.23E+03 |
| ENSG00000165644 | COMTD1       | 0.56 | -1.78 | -0.83 | 2.09E-06 | -1.23E+03 | 1.23E+03 |
| ENSG00000182220 | ATP6AP2      | 1.48 | 1.48  | 0.56  | 1.45E-06 | 1.23E+03  | 1.23E+03 |
| ENSG00000073921 | PICALM       | 1.50 | 1.50  | 0.59  | 1.51E-06 | 1.22E+03  | 1.22E+03 |
| ENSG00000137054 | POLR1E       | 0.69 | -1.44 | -0.53 | 1.41E-06 | -1.22E+03 | 1.22E+03 |
| ENSG00000159445 | THEM4        | 0.69 | -1.45 | -0.53 | 1.41E-06 | -1.22E+03 | 1.22E+03 |
| ENSG00000087245 | MMP2         | 1.58 | 1.58  | 0.66  | 1.70E-06 | 1.21E+03  | 1.21E+03 |
| ENSG00000144959 | NCEH1        | 0.65 | -1.54 | -0.62 | 1.62E-06 | -1.21E+03 | 1.21E+03 |
| ENSG00000117758 | STX12        | 0.68 | -1.47 | -0.56 | 1.49E-06 | -1.21E+03 | 1.21E+03 |
| ENSG00000214189 | ZNF788       | 0.66 | -1.50 | -0.59 | 1.56E-06 | -1.21E+03 | 1.21E+03 |
| ENSG00000074266 | EED          | 0.69 | -1.45 | -0.54 | 1.45E-06 | -1.21E+03 | 1.21E+03 |
| ENSG00000135845 | PIGC         | 0.69 | -1.44 | -0.53 | 1.43E-06 | -1.21E+03 | 1.21E+03 |
| ENSG00000124508 | BTN2A2       | 0.68 | -1.47 | -0.56 | 1.50E-06 | -1.20E+03 | 1.20E+03 |
| ENSG00000269486 | CTC-360G5.9  | 1.68 | 1.68  | 0.75  | 1.95E-06 | 1.20E+03  | 1.20E+03 |
| ENSG00000156030 | ELMSAN1      | 1.46 | 1.46  | 0.55  | 1.49E-06 | 1.20E+03  | 1.20E+03 |
| ENSG00000147408 | CSGALNACT1   | 1.45 | 1.45  | 0.53  | 1.48E-06 | 1.19E+03  | 1.19E+03 |
| ENSG00000251669 | FAM86EP      | 2.07 | 2.07  | 1.05  | 3.06E-06 | 1.18E+03  | 1.18E+03 |
| ENSG00000006025 | OSBPL7       | 0.64 | -1.57 | -0.65 | 1.77E-06 | -1.18E+03 | 1.18E+03 |
| ENSG00000245213 | RP11-10K16.1 | 1.88 | 1.88  | 0.91  | 2.52E-06 | 1.18E+03  | 1.18E+03 |
| ENSG00000198042 | MAK16        | 0.70 | -1.43 | -0.52 | 1.48E-06 | -1.18E+03 | 1.18E+03 |
| ENSG00000120708 | TGFBI        | 1.53 | 1.53  | 0.62  | 1.70E-06 | 1.18E+03  | 1.18E+03 |
| ENSG00000175727 | MLXIP        | 1.43 | 1.43  | 0.51  | 1.48E-06 | 1.18E+03  | 1.18E+03 |
| ENSG00000152377 | SPOCK1       | 1.55 | 1.55  | 0.63  | 1.73E-06 | 1.17E+03  | 1.17E+03 |
| ENSG00000130748 | TMEM160      | 0.60 | -1.68 | -0.75 | 2.05E-06 | -1.17E+03 | 1.17E+03 |
| ENSG00000006607 | FARP2        | 0.66 | -1.52 | -0.61 | 1.68E-06 | -1.17E+03 | 1.17E+03 |
| ENSG00000164603 | C7orf60      | 1.46 | 1.46  | 0.55  | 1.57E-06 | 1.17E+03  | 1.17E+03 |

|                 |               |      |       |       |          |           |          |
|-----------------|---------------|------|-------|-------|----------|-----------|----------|
| ENSG00000116668 | SWT1          | 1.61 | 1.61  | 0.68  | 1.90E-06 | 1.17E+03  | 1.17E+03 |
| ENSG00000112559 | MDF1          | 1.46 | 1.46  | 0.55  | 1.58E-06 | 1.17E+03  | 1.17E+03 |
| ENSG00000113300 | CNOT6         | 1.43 | 1.43  | 0.52  | 1.51E-06 | 1.17E+03  | 1.17E+03 |
| ENSG00000186329 | TMEM212       | 1.78 | 1.78  | 0.83  | 2.35E-06 | 1.16E+03  | 1.16E+03 |
| ENSG00000105204 | DYRK1B        | 1.69 | 1.69  | 0.75  | 2.12E-06 | 1.16E+03  | 1.16E+03 |
| ENSG00000115053 | NCL           | 0.68 | -1.47 | -0.55 | 1.63E-06 | -1.15E+03 | 1.15E+03 |
| ENSG00000198932 | GPRASP1       | 0.50 | -1.99 | -0.99 | 3.00E-06 | -1.15E+03 | 1.15E+03 |
| ENSG00000132313 | MRPL35        | 0.70 | -1.43 | -0.52 | 1.57E-06 | -1.15E+03 | 1.15E+03 |
| ENSG00000101265 | RASSF2        | 1.48 | 1.48  | 0.56  | 1.67E-06 | 1.14E+03  | 1.14E+03 |
| ENSG00000172765 | TMCC1         | 1.44 | 1.44  | 0.53  | 1.59E-06 | 1.14E+03  | 1.14E+03 |
| ENSG00000173281 | PPP1R3B       | 1.45 | 1.45  | 0.54  | 1.63E-06 | 1.14E+03  | 1.14E+03 |
|                 | CTD-3116E22.4 | 1.89 | 1.89  | 0.92  | 2.75E-06 | 1.14E+03  | 1.14E+03 |
| ENSG00000135968 | GCC2          | 1.69 | 1.69  | 0.75  | 2.20E-06 | 1.14E+03  | 1.14E+03 |
| ENSG00000185215 | TNFAIP2       | 1.47 | 1.47  | 0.56  | 1.68E-06 | 1.14E+03  | 1.14E+03 |
| ENSG00000198954 | KIAA1279      | 0.69 | -1.46 | -0.54 | 1.65E-06 | -1.13E+03 | 1.13E+03 |
| ENSG00000109436 | TBC1D9        | 1.47 | 1.47  | 0.55  | 1.68E-06 | 1.13E+03  | 1.13E+03 |
| ENSG00000132661 | NXT1          | 0.69 | -1.46 | -0.54 | 1.65E-06 | -1.13E+03 | 1.13E+03 |
| ENSG00000162236 | STX5          | 0.70 | -1.43 | -0.52 | 1.61E-06 | -1.13E+03 | 1.13E+03 |
| ENSG00000172922 | RNASEH2C      | 0.68 | -1.48 | -0.56 | 1.74E-06 | -1.12E+03 | 1.12E+03 |
| ENSG00000235954 | TTC28-AS1     | 1.45 | 1.45  | 0.53  | 1.67E-06 | 1.12E+03  | 1.12E+03 |
| ENSG00000186666 | BCDIN3D       | 1.63 | 1.63  | 0.71  | 2.16E-06 | 1.11E+03  | 1.11E+03 |
| ENSG00000141425 | RPRD1A        | 0.69 | -1.46 | -0.55 | 1.72E-06 | -1.11E+03 | 1.11E+03 |
| ENSG00000183763 | TRAP1         | 0.61 | -1.63 | -0.71 | 2.18E-06 | -1.11E+03 | 1.11E+03 |
| ENSG00000152409 | JMY           | 1.53 | 1.53  | 0.61  | 1.90E-06 | 1.11E+03  | 1.11E+03 |
| ENSG00000113272 | THG1L         | 0.64 | -1.56 | -0.64 | 2.00E-06 | -1.10E+03 | 1.10E+03 |
| ENSG00000117643 | MAN1C1        | 0.56 | -1.78 | -0.83 | 2.65E-06 | -1.10E+03 | 1.10E+03 |
| ENSG00000138780 | GSTCD         | 0.70 | -1.44 | -0.52 | 1.73E-06 | -1.09E+03 | 1.09E+03 |
| ENSG00000166145 | SPINT1        | 1.85 | 1.85  | 0.89  | 2.87E-06 | 1.09E+03  | 1.09E+03 |
| ENSG00000118200 | CAMSAP2       | 1.61 | 1.61  | 0.69  | 2.18E-06 | 1.09E+03  | 1.09E+03 |
| ENSG00000196584 | XRCC2         | 0.69 | -1.45 | -0.54 | 1.79E-06 | -1.08E+03 | 1.08E+03 |
| ENSG00000151348 | EXT2          | 1.46 | 1.46  | 0.55  | 1.83E-06 | 1.08E+03  | 1.08E+03 |
| ENSG00000225921 | NOL7          | 0.69 | -1.44 | -0.53 | 1.78E-06 | -1.08E+03 | 1.08E+03 |
| ENSG00000127564 | PKMYT1        | 0.61 | -1.64 | -0.72 | 2.32E-06 | -1.08E+03 | 1.08E+03 |
| ENSG00000267242 | AC069278.4    | 1.90 | 1.90  | 0.93  | 3.11E-06 | 1.08E+03  | 1.08E+03 |
| ENSG00000065308 | TRAM2         | 1.54 | 1.54  | 0.62  | 2.06E-06 | 1.07E+03  | 1.07E+03 |
| ENSG00000158321 | AUTS2         | 1.79 | 1.79  | 0.84  | 2.81E-06 | 1.07E+03  | 1.07E+03 |
| ENSG00000142694 | EVA1B         | 0.71 | -1.42 | -0.50 | 1.76E-06 | -1.07E+03 | 1.07E+03 |
| ENSG00000071462 | WBSCR22       | 0.69 | -1.45 | -0.54 | 1.86E-06 | -1.07E+03 | 1.07E+03 |
| ENSG00000159842 | ABR           | 1.55 | 1.55  | 0.63  | 2.13E-06 | 1.06E+03  | 1.06E+03 |
| ENSG00000077097 | TOP2B         | 1.57 | 1.57  | 0.65  | 2.18E-06 | 1.06E+03  | 1.06E+03 |
| ENSG00000018408 | WWTR1         | 1.46 | 1.46  | 0.55  | 1.89E-06 | 1.06E+03  | 1.06E+03 |
| ENSG00000249348 | UGDH-AS1      | 1.75 | 1.75  | 0.81  | 2.71E-06 | 1.06E+03  | 1.06E+03 |
| ENSG00000137411 | VARS2         | 1.43 | 1.43  | 0.51  | 1.81E-06 | 1.06E+03  | 1.06E+03 |
| ENSG00000132541 | HRSP12        | 1.45 | 1.45  | 0.54  | 1.88E-06 | 1.06E+03  | 1.06E+03 |
| ENSG00000137496 | IL18BP        | 0.57 | -1.77 | -0.82 | 2.81E-06 | -1.06E+03 | 1.06E+03 |
| ENSG00000100926 | TM9SF1        | 0.70 | -1.44 | -0.52 | 1.86E-06 | -1.05E+03 | 1.05E+03 |
| ENSG00000160190 | SLC37A1       | 1.54 | 1.54  | 0.62  | 2.15E-06 | 1.05E+03  | 1.05E+03 |
| ENSG00000176974 | SHMT1         | 0.70 | -1.44 | -0.52 | 1.88E-06 | -1.05E+03 | 1.05E+03 |
| ENSG00000164916 | FOXK1         | 1.46 | 1.46  | 0.55  | 1.96E-06 | 1.05E+03  | 1.05E+03 |
| ENSG00000173418 | NAA20         | 0.68 | -1.47 | -0.55 | 1.97E-06 | -1.04E+03 | 1.04E+03 |
| ENSG00000165355 | FBXO33        | 1.43 | 1.43  | 0.52  | 1.90E-06 | 1.04E+03  | 1.04E+03 |
| ENSG00000126709 | IFI6          | 0.53 | -1.88 | -0.91 | 3.27E-06 | -1.04E+03 | 1.04E+03 |
| ENSG00000008952 | SEC62         | 1.54 | 1.54  | 0.62  | 2.21E-06 | 1.04E+03  | 1.04E+03 |
| ENSG00000091409 | ITGA6         | 1.47 | 1.47  | 0.55  | 2.00E-06 | 1.04E+03  | 1.04E+03 |
| ENSG00000167460 | TPM4          | 1.46 | 1.46  | 0.55  | 2.00E-06 | 1.04E+03  | 1.04E+03 |
| ENSG00000153317 | ASAP1         | 1.52 | 1.52  | 0.60  | 2.17E-06 | 1.03E+03  | 1.03E+03 |
| ENSG00000091129 | NRCAM         | 0.69 | -1.46 | -0.54 | 2.03E-06 | -1.02E+03 | 1.02E+03 |
| ENSG00000138166 | DUSP5         | 1.48 | 1.48  | 0.57  | 2.11E-06 | 1.02E+03  | 1.02E+03 |
| ENSG00000204217 | BMPR2         | 1.59 | 1.59  | 0.67  | 2.44E-06 | 1.02E+03  | 1.02E+03 |
| ENSG00000100036 | SLC35E4       | 1.47 | 1.47  | 0.56  | 2.12E-06 | 1.01E+03  | 1.01E+03 |
| ENSG00000155666 | KDM8          | 0.57 | -1.75 | -0.81 | 3.00E-06 | -1.01E+03 | 1.01E+03 |
| ENSG00000171867 | PRNP          | 1.46 | 1.46  | 0.54  | 2.08E-06 | 1.01E+03  | 1.01E+03 |
| ENSG00000105497 | ZNF175        | 1.43 | 1.43  | 0.51  | 2.00E-06 | 1.01E+03  | 1.01E+03 |
|                 | AC004967.8    | 0.55 | -1.83 | -0.87 | 3.31E-06 | -1.01E+03 | 1.01E+03 |
| ENSG00000136940 | PDCL          | 1.56 | 1.56  | 0.65  | 2.43E-06 | 1.00E+03  | 1.00E+03 |
| ENSG00000115661 | STK16         | 1.50 | 1.50  | 0.59  | 2.27E-06 | 9.96E+02  | 9.96E+02 |
| ENSG00000173638 | SLC19A1       | 0.67 | -1.50 | -0.59 | 2.28E-06 | -9.95E+02 | 9.95E+02 |
| ENSG00000254087 | LYN           | 1.48 | 1.48  | 0.57  | 2.22E-06 | 9.94E+02  | 9.94E+02 |
| ENSG00000150551 | LYPD1         | 0.67 | -1.49 | -0.58 | 2.25E-06 | -9.93E+02 | 9.93E+02 |
| ENSG00000167088 | SNRPD1        | 0.68 | -1.48 | -0.57 | 2.22E-06 | -9.93E+02 | 9.93E+02 |
| ENSG00000174574 | AKIRIN1       | 1.46 | 1.46  | 0.55  | 2.17E-06 | 9.92E+02  | 9.92E+02 |
| ENSG00000234614 | AL450992.2    | 2.02 | 2.02  | 1.01  | 4.15E-06 | 9.89E+02  | 9.89E+02 |
| ENSG00000159388 | BTG2          | 1.47 | 1.47  | 0.56  | 2.22E-06 | 9.89E+02  | 9.89E+02 |
| ENSG00000167984 | NLRC3         | 1.91 | 1.91  | 0.93  | 3.75E-06 | 9.86E+02  | 9.86E+02 |
| ENSG00000110852 | CLEC2B        | 1.45 | 1.45  | 0.54  | 2.17E-06 | 9.86E+02  | 9.86E+02 |
| ENSG00000182923 | CEP63         | 1.48 | 1.48  | 0.56  | 2.26E-06 | 9.83E+02  | 9.83E+02 |
| ENSG00000102763 | VWA8          | 0.70 | -1.44 | -0.52 | 2.14E-06 | -9.83E+02 | 9.83E+02 |
| ENSG00000111364 | DDX55         | 0.70 | -1.44 | -0.52 | 2.15E-06 | -9.82E+02 | 9.82E+02 |
| ENSG00000184497 | FAM70B        | 1.49 | 1.49  | 0.57  | 2.30E-06 | 9.81E+02  | 9.81E+02 |

|                 |                  |      |       |       |          |           |          |
|-----------------|------------------|------|-------|-------|----------|-----------|----------|
| ENSG00000188735 | TMEM120B         | 0.67 | -1.50 | -0.59 | 2.36E-06 | -9.79E+02 | 9.79E+02 |
| ENSG00000144843 | ADPRH            | 0.60 | -1.66 | -0.73 | 2.91E-06 | -9.73E+02 | 9.73E+02 |
| ENSG00000198142 | SOWAHC           | 1.60 | 1.60  | 0.68  | 2.72E-06 | 9.71E+02  | 9.71E+02 |
| ENSG00000184056 | VPS33B           | 0.70 | -1.43 | -0.52 | 2.18E-06 | -9.70E+02 | 9.70E+02 |
| ENSG00000179909 | ZNF154           | 0.53 | -1.88 | -0.91 | 3.80E-06 | -9.66E+02 | 9.66E+02 |
| ENSG00000160783 | PMF1             | 0.69 | -1.46 | -0.54 | 2.29E-06 | -9.64E+02 | 9.64E+02 |
| ENSG00000167779 | IGFBP6           | 1.49 | 1.49  | 0.58  | 2.41E-06 | 9.63E+02  | 9.63E+02 |
| ENSG00000212916 | KIAA1383         | 1.57 | 1.57  | 0.65  | 2.64E-06 | 9.63E+02  | 9.63E+02 |
| ENSG00000261236 | BOP1             | 0.65 | -1.53 | -0.62 | 2.54E-06 | -9.61E+02 | 9.61E+02 |
| ENSG00000198324 | FAM109A          | 1.50 | 1.50  | 0.58  | 2.46E-06 | 9.57E+02  | 9.57E+02 |
| ENSG00000163633 | C4orf36          | 1.58 | 1.58  | 0.66  | 2.73E-06 | 9.55E+02  | 9.55E+02 |
| ENSG00000197943 | PLCG2            | 0.65 | -1.53 | -0.61 | 2.56E-06 | -9.55E+02 | 9.55E+02 |
| ENSG00000179314 | WSCD1            | 1.44 | 1.44  | 0.52  | 2.26E-06 | 9.55E+02  | 9.55E+02 |
| ENSG00000165568 | AKR1E2           | 1.59 | 1.59  | 0.67  | 2.77E-06 | 9.55E+02  | 9.55E+02 |
| ENSG00000127511 | SIN3B            | 1.46 | 1.46  | 0.54  | 2.33E-06 | 9.54E+02  | 9.54E+02 |
| ENSG00000197451 | HNRNPAB          | 0.68 | -1.46 | -0.55 | 2.35E-06 | -9.54E+02 | 9.54E+02 |
| ENSG00000130921 | C12orf65         | 0.68 | -1.47 | -0.55 | 2.37E-06 | -9.53E+02 | 9.53E+02 |
| ENSG00000162377 | SELRC1           | 0.68 | -1.46 | -0.55 | 2.37E-06 | -9.50E+02 | 9.50E+02 |
| ENSG00000070366 | SMG6             | 1.54 | 1.54  | 0.62  | 2.65E-06 | 9.45E+02  | 9.45E+02 |
| ENSG00000260267 | RP11-452L6.5     | 1.50 | 1.50  | 0.58  | 2.53E-06 | 9.43E+02  | 9.43E+02 |
| ENSG00000135269 | TES              | 1.44 | 1.44  | 0.52  | 2.34E-06 | 9.39E+02  | 9.39E+02 |
| ENSG00000092208 | GEMIN2           | 0.68 | -1.48 | -0.57 | 2.49E-06 | -9.38E+02 | 9.38E+02 |
| ENSG00000198625 | MDM4             | 0.69 | -1.44 | -0.53 | 2.37E-06 | -9.38E+02 | 9.38E+02 |
| ENSG00000172613 | RAD9A            | 0.59 | -1.70 | -0.76 | 3.29E-06 | -9.36E+02 | 9.36E+02 |
| ENSG00000171206 | TRIM8            | 1.44 | 1.44  | 0.53  | 2.37E-06 | 9.35E+02  | 9.35E+02 |
| ENSG00000108312 | UBTF             | 0.70 | -1.43 | -0.52 | 2.35E-06 | -9.35E+02 | 9.35E+02 |
| ENSG00000132846 | ZBED3            | 0.58 | -1.72 | -0.78 | 3.43E-06 | -9.29E+02 | 9.29E+02 |
| ENSG00000044090 | CUL7             | 1.44 | 1.44  | 0.53  | 2.41E-06 | 9.29E+02  | 9.29E+02 |
| ENSG00000053770 | AP5M1            | 1.50 | 1.50  | 0.59  | 2.64E-06 | 9.24E+02  | 9.24E+02 |
| ENSG00000087299 | L2HGDH           | 0.59 | -1.69 | -0.76 | 3.37E-06 | -9.22E+02 | 9.22E+02 |
| ENSG00000196872 | KIAA1211L        | 1.55 | 1.55  | 0.63  | 2.86E-06 | 9.17E+02  | 9.17E+02 |
| ENSG00000164758 | MED30            | 0.68 | -1.48 | -0.56 | 2.60E-06 | -9.16E+02 | 9.16E+02 |
| ENSG00000261295 | RP11-524D16__A.3 | 1.78 | 1.78  | 0.83  | 3.80E-06 | 9.14E+02  | 9.14E+02 |
| ENSG00000162924 | REL              | 1.57 | 1.57  | 0.65  | 2.94E-06 | 9.13E+02  | 9.13E+02 |
| ENSG00000165458 | INPPL1           | 1.45 | 1.45  | 0.53  | 2.52E-06 | 9.11E+02  | 9.11E+02 |
| ENSG00000073584 | SMARCE1          | 1.43 | 1.43  | 0.52  | 2.49E-06 | 9.09E+02  | 9.09E+02 |
| ENSG00000130713 | EXOSC2           | 0.70 | -1.43 | -0.52 | 2.53E-06 | -9.02E+02 | 9.02E+02 |
| ENSG00000118900 | UBN1             | 1.46 | 1.46  | 0.55  | 2.65E-06 | 8.97E+02  | 8.97E+02 |
| ENSG00000179364 | PACS2            | 1.48 | 1.48  | 0.56  | 2.72E-06 | 8.96E+02  | 8.96E+02 |
| ENSG00000158019 | BRE              | 1.46 | 1.46  | 0.55  | 2.66E-06 | 8.96E+02  | 8.96E+02 |
| ENSG00000011451 | WIZ              | 1.45 | 1.45  | 0.54  | 2.62E-06 | 8.96E+02  | 8.96E+02 |
| ENSG00000100299 | ARSA             | 1.52 | 1.52  | 0.61  | 2.90E-06 | 8.94E+02  | 8.94E+02 |
| ENSG00000081803 | CADPS2           | 0.70 | -1.43 | -0.52 | 2.58E-06 | -8.90E+02 | 8.90E+02 |
| ENSG00000092201 | SUPT16H          | 0.69 | -1.45 | -0.53 | 2.70E-06 | -8.82E+02 | 8.82E+02 |
| ENSG00000157111 | TMEM171          | 1.56 | 1.56  | 0.65  | 3.17E-06 | 8.79E+02  | 8.79E+02 |
| ENSG00000168938 | PPIC             | 1.43 | 1.43  | 0.51  | 2.66E-06 | 8.76E+02  | 8.76E+02 |
| ENSG00000162144 | CYBASC3          | 1.44 | 1.44  | 0.53  | 2.72E-06 | 8.73E+02  | 8.73E+02 |
| ENSG00000117616 | C1orf63          | 0.70 | -1.43 | -0.52 | 2.69E-06 | -8.73E+02 | 8.73E+02 |
| ENSG00000172731 | LRRC20           | 1.48 | 1.48  | 0.57  | 2.90E-06 | 8.72E+02  | 8.72E+02 |
| ENSG00000198814 | GK               | 0.66 | -1.52 | -0.61 | 3.05E-06 | -8.72E+02 | 8.72E+02 |
| ENSG00000111696 | NT5DC3           | 0.68 | -1.48 | -0.57 | 2.90E-06 | -8.69E+02 | 8.69E+02 |
| ENSG00000156535 | CD109            | 1.47 | 1.47  | 0.56  | 2.88E-06 | 8.68E+02  | 8.68E+02 |
| ENSG00000132849 | INADL            | 1.48 | 1.48  | 0.56  | 2.94E-06 | 8.62E+02  | 8.62E+02 |
| ENSG00000185947 | ZNF267           | 1.59 | 1.59  | 0.67  | 3.43E-06 | 8.58E+02  | 8.58E+02 |
| ENSG00000104763 | ASAH1            | 1.50 | 1.50  | 0.59  | 3.07E-06 | 8.56E+02  | 8.56E+02 |
| ENSG00000169136 | ATF5             | 0.67 | -1.49 | -0.57 | 3.07E-06 | -8.50E+02 | 8.50E+02 |
| ENSG00000148400 | NOTCH1           | 1.55 | 1.55  | 0.64  | 3.35E-06 | 8.49E+02  | 8.49E+02 |
| ENSG00000129195 | FAM64A           | 0.69 | -1.46 | -0.54 | 2.95E-06 | -8.48E+02 | 8.48E+02 |
| ENSG00000125089 | SH3TC1           | 1.44 | 1.44  | 0.53  | 2.95E-06 | 8.39E+02  | 8.39E+02 |
| ENSG00000128973 | CLN6             | 0.70 | -1.42 | -0.51 | 2.86E-06 | -8.39E+02 | 8.39E+02 |
| ENSG00000240849 | TMEM189          | 1.46 | 1.46  | 0.55  | 3.06E-06 | 8.36E+02  | 8.36E+02 |
| ENSG00000204954 | C12orf73         | 1.65 | 1.65  | 0.72  | 3.91E-06 | 8.35E+02  | 8.35E+02 |
| ENSG00000174705 | SH3PXD2B         | 1.47 | 1.47  | 0.56  | 3.12E-06 | 8.34E+02  | 8.34E+02 |
| ENSG00000089335 | ZNF302           | 1.53 | 1.53  | 0.61  | 3.36E-06 | 8.33E+02  | 8.33E+02 |
| ENSG00000107372 | ZFAND5           | 1.45 | 1.45  | 0.54  | 3.05E-06 | 8.32E+02  | 8.32E+02 |
| ENSG00000259673 | IQCH-AS1         | 1.92 | 1.92  | 0.94  | 5.38E-06 | 8.30E+02  | 8.30E+02 |
| ENSG00000151773 | CCDC122          | 1.62 | 1.62  | 0.70  | 3.82E-06 | 8.29E+02  | 8.29E+02 |
| ENSG00000139197 | PEX5             | 1.43 | 1.43  | 0.51  | 2.98E-06 | 8.26E+02  | 8.26E+02 |
| ENSG00000160799 | CCDC12           | 1.41 | 1.41  | 0.50  | 2.93E-06 | 8.25E+02  | 8.25E+02 |
| ENSG00000168765 | GSTM4            | 0.49 | -2.05 | -1.04 | 6.19E-06 | -8.25E+02 | 8.25E+02 |
| ENSG00000179271 | GADD45GIP1       | 0.71 | -1.42 | -0.50 | 3.00E-06 | -8.18E+02 | 8.18E+02 |
| ENSG00000121350 | PYROXD1          | 1.52 | 1.52  | 0.60  | 3.51E-06 | 8.11E+02  | 8.11E+02 |
| ENSG00000123219 | CENPK            | 0.68 | -1.48 | -0.56 | 3.32E-06 | -8.10E+02 | 8.10E+02 |
| ENSG00000273899 | NOL12            | 0.57 | -1.77 | -0.82 | 4.79E-06 | -8.07E+02 | 8.07E+02 |
| ENSG00000068724 | TTC7A            | 1.44 | 1.44  | 0.53  | 3.19E-06 | 8.05E+02  | 8.05E+02 |
| ENSG00000116198 | CEP104           | 1.57 | 1.57  | 0.65  | 3.80E-06 | 8.05E+02  | 8.05E+02 |
| ENSG00000263272 | CTC-524C5.2      | 0.50 | -1.99 | -1.00 | 6.15E-06 | -8.04E+02 | 8.04E+02 |
| ENSG00000105287 | PRKD2            | 1.42 | 1.42  | 0.51  | 3.16E-06 | 8.00E+02  | 8.00E+02 |
| ENSG00000069020 | MAST4            | 1.46 | 1.46  | 0.54  | 3.33E-06 | 7.98E+02  | 7.98E+02 |

|                 |                |      |       |       |          |           |          |
|-----------------|----------------|------|-------|-------|----------|-----------|----------|
| ENSG00000233178 | RP11-88I18.2   | 1.67 | 1.67  | 0.74  | 4.39E-06 | 7.97E+02  | 7.97E+02 |
| ENSG00000164611 | PTTG1          | 0.69 | -1.45 | -0.54 | 3.36E-06 | -7.92E+02 | 7.92E+02 |
| ENSG00000141994 | DUS3L          | 0.68 | -1.46 | -0.55 | 3.41E-06 | -7.91E+02 | 7.91E+02 |
| ENSG00000034152 | MAP2K3         | 1.45 | 1.45  | 0.54  | 3.40E-06 | 7.87E+02  | 7.87E+02 |
| ENSG00000077092 | RARB           | 0.68 | -1.47 | -0.56 | 3.50E-06 | -7.86E+02 | 7.86E+02 |
| ENSG00000173905 | GOLIM4         | 1.46 | 1.46  | 0.55  | 3.46E-06 | 7.84E+02  | 7.84E+02 |
| ENSG00000178921 | PFAS           | 0.66 | -1.52 | -0.60 | 3.76E-06 | -7.83E+02 | 7.83E+02 |
| ENSG00000167220 | HDHD2          | 0.68 | -1.46 | -0.55 | 3.50E-06 | -7.82E+02 | 7.82E+02 |
| ENSG00000108256 | NUFIP2         | 1.46 | 1.46  | 0.54  | 3.48E-06 | 7.80E+02  | 7.80E+02 |
| ENSG00000113522 | RAD50          | 1.78 | 1.78  | 0.83  | 5.22E-06 | 7.80E+02  | 7.80E+02 |
| ENSG00000248360 | LINC00504      | 1.74 | 1.74  | 0.80  | 5.03E-06 | 7.76E+02  | 7.76E+02 |
| ENSG00000168612 | ZSWIM1         | 0.63 | -1.60 | -0.68 | 4.26E-06 | -7.76E+02 | 7.76E+02 |
| ENSG00000114491 | UMPS           | 0.71 | -1.42 | -0.50 | 3.33E-06 | -7.75E+02 | 7.75E+02 |
| ENSG00000167601 | AXL            | 0.65 | -1.53 | -0.61 | 3.88E-06 | -7.75E+02 | 7.75E+02 |
| ENSG00000148411 | NACC2          | 1.43 | 1.43  | 0.52  | 3.43E-06 | 7.75E+02  | 7.75E+02 |
| ENSG00000166340 | TPP1           | 1.42 | 1.42  | 0.50  | 3.36E-06 | 7.74E+02  | 7.74E+02 |
| ENSG00000161960 | EIF4A1         | 0.62 | -1.61 | -0.69 | 4.35E-06 | -7.73E+02 | 7.73E+02 |
| ENSG00000161542 | PRPSAP1        | 1.42 | 1.42  | 0.50  | 3.36E-06 | 7.72E+02  | 7.72E+02 |
| ENSG00000242028 | HYPK           | 1.65 | 1.65  | 0.72  | 4.56E-06 | 7.72E+02  | 7.72E+02 |
| ENSG00000258199 | RP11-977G19.5  | 0.55 | -1.83 | -0.87 | 5.66E-06 | -7.71E+02 | 7.71E+02 |
| ENSG00000184378 | ACTRT3         | 0.55 | -1.81 | -0.85 | 5.51E-06 | -7.70E+02 | 7.70E+02 |
| ENSG00000152944 | MED21          | 0.71 | -1.42 | -0.50 | 3.45E-06 | -7.62E+02 | 7.62E+02 |
| ENSG00000260855 | RP11-439E19.10 | 2.16 | 2.16  | 1.11  | 8.11E-06 | 7.59E+02  | 7.59E+02 |
|                 | C16orf85       | 1.80 | 1.80  | 0.85  | 5.65E-06 | 7.59E+02  | 7.59E+02 |
| ENSG00000126247 | CAPNS1         | 1.46 | 1.46  | 0.55  | 3.77E-06 | 7.51E+02  | 7.51E+02 |
| ENSG00000116675 | DNAJC6         | 0.63 | -1.59 | -0.67 | 4.52E-06 | -7.48E+02 | 7.48E+02 |
| ENSG00000000419 | DPM1           | 0.70 | -1.42 | -0.51 | 3.65E-06 | -7.45E+02 | 7.45E+02 |
| ENSG00000143669 | LYST           | 1.73 | 1.73  | 0.79  | 5.39E-06 | 7.45E+02  | 7.45E+02 |
| ENSG00000102174 | PHEX           | 1.54 | 1.54  | 0.62  | 4.31E-06 | 7.41E+02  | 7.41E+02 |
| ENSG00000102606 | ARHGEF7        | 1.44 | 1.44  | 0.53  | 3.89E-06 | 7.32E+02  | 7.32E+02 |
| ENSG00000198707 | CEP290         | 1.55 | 1.55  | 0.63  | 4.46E-06 | 7.32E+02  | 7.32E+02 |
| ENSG00000198846 | TOX            | 0.62 | -1.61 | -0.69 | 4.83E-06 | -7.32E+02 | 7.32E+02 |
| ENSG00000143127 | ITGA10         | 0.70 | -1.43 | -0.52 | 3.83E-06 | -7.31E+02 | 7.31E+02 |
| ENSG00000120875 | DUSP4          | 1.53 | 1.53  | 0.62  | 4.44E-06 | 7.27E+02  | 7.27E+02 |
| ENSG00000006459 | JHDM1D         | 1.42 | 1.42  | 0.51  | 3.82E-06 | 7.26E+02  | 7.26E+02 |
| ENSG00000186010 | NDUFA13        | 0.65 | -1.53 | -0.61 | 4.43E-06 | -7.26E+02 | 7.26E+02 |
| ENSG00000091428 | RAPGEF4        | 0.63 | -1.59 | -0.67 | 4.90E-06 | -7.17E+02 | 7.17E+02 |
| ENSG00000154529 | CNTNAP3B       | 0.69 | -1.45 | -0.54 | 4.11E-06 | -7.16E+02 | 7.16E+02 |
| ENSG00000184719 | RNLS           | 0.55 | -1.81 | -0.86 | 6.39E-06 | -7.16E+02 | 7.16E+02 |
| ENSG00000188542 | DUSP28         | 1.70 | 1.70  | 0.77  | 5.66E-06 | 7.15E+02  | 7.15E+02 |
| ENSG00000170581 | STAT2          | 0.71 | -1.42 | -0.50 | 3.93E-06 | -7.14E+02 | 7.14E+02 |
| ENSG00000112343 | TRIM38         | 1.41 | 1.41  | 0.49  | 3.90E-06 | 7.13E+02  | 7.13E+02 |
| ENSG00000147174 | ACRC           | 1.74 | 1.74  | 0.80  | 5.96E-06 | 7.13E+02  | 7.13E+02 |
| ENSG00000108479 | GALK1          | 0.71 | -1.40 | -0.49 | 3.90E-06 | -7.11E+02 | 7.11E+02 |
| ENSG00000113657 | DPYSL3         | 1.53 | 1.53  | 0.62  | 4.71E-06 | 7.07E+02  | 7.07E+02 |
| ENSG00000141699 | FAM134C        | 1.43 | 1.43  | 0.51  | 4.14E-06 | 7.02E+02  | 7.02E+02 |
| ENSG00000128050 | PAICS          | 0.67 | -1.49 | -0.57 | 4.50E-06 | -7.00E+02 | 7.00E+02 |
| ENSG00000164885 | CDK5           | 1.41 | 1.41  | 0.50  | 4.07E-06 | 6.99E+02  | 6.99E+02 |
| ENSG00000069943 | PIGB           | 0.69 | -1.45 | -0.54 | 4.32E-06 | -6.99E+02 | 6.99E+02 |
| ENSG00000149761 | NUDT22         | 0.70 | -1.43 | -0.52 | 4.21E-06 | -6.97E+02 | 6.97E+02 |
| ENSG00000078902 | TOLLIP         | 1.40 | 1.40  | 0.49  | 4.07E-06 | 6.97E+02  | 6.97E+02 |
| ENSG00000159479 | MED8           | 0.71 | -1.42 | -0.50 | 4.17E-06 | -6.93E+02 | 6.93E+02 |
| ENSG00000179922 | ZNF784         | 0.56 | -1.79 | -0.84 | 6.70E-06 | -6.91E+02 | 6.91E+02 |
| ENSG00000198865 | CCDC152        | 0.61 | -1.65 | -0.72 | 5.69E-06 | -6.91E+02 | 6.91E+02 |
| ENSG00000148158 | SNX30          | 1.43 | 1.43  | 0.51  | 4.31E-06 | 6.88E+02  | 6.88E+02 |
| ENSG00000101236 | RNF24          | 0.62 | -1.60 | -0.68 | 5.42E-06 | -6.88E+02 | 6.88E+02 |
| ENSG00000114988 | LMAN2L         | 1.40 | 1.40  | 0.49  | 4.17E-06 | 6.87E+02  | 6.87E+02 |
| ENSG00000164032 | H2AFZ          | 0.68 | -1.46 | -0.55 | 4.53E-06 | -6.86E+02 | 6.86E+02 |
| ENSG00000183018 | SPNS2          | 0.66 | -1.52 | -0.61 | 4.94E-06 | -6.86E+02 | 6.86E+02 |
| ENSG00000014123 | UFL1           | 1.72 | 1.72  | 0.78  | 6.35E-06 | 6.81E+02  | 6.81E+02 |
| ENSG00000275342 | SGK223         | 1.59 | 1.59  | 0.67  | 5.52E-06 | 6.78E+02  | 6.78E+02 |
| ENSG00000065534 | MYLK           | 1.50 | 1.50  | 0.58  | 4.91E-06 | 6.76E+02  | 6.76E+02 |
| ENSG00000198844 | ARHGEF15       | 1.45 | 1.45  | 0.54  | 4.62E-06 | 6.76E+02  | 6.76E+02 |
| ENSG00000104870 | FCGRT          | 0.71 | -1.41 | -0.50 | 4.36E-06 | -6.76E+02 | 6.76E+02 |
| ENSG00000204946 | ZNF783         | 0.64 | -1.57 | -0.65 | 5.37E-06 | -6.76E+02 | 6.76E+02 |
| ENSG00000102316 | MAGED2         | 0.69 | -1.45 | -0.53 | 4.63E-06 | -6.73E+02 | 6.73E+02 |
| ENSG00000107099 | DOCK8          | 1.45 | 1.45  | 0.54  | 4.68E-06 | 6.71E+02  | 6.71E+02 |
| ENSG00000059728 | MXD1           | 0.65 | -1.54 | -0.62 | 5.27E-06 | -6.70E+02 | 6.70E+02 |
| ENSG00000131778 | CHD1L          | 0.70 | -1.42 | -0.51 | 4.54E-06 | -6.68E+02 | 6.68E+02 |
| ENSG00000177119 | ANO6           | 1.45 | 1.45  | 0.54  | 4.76E-06 | 6.66E+02  | 6.66E+02 |
| ENSG00000173198 | CYSLTR1        | 1.92 | 1.92  | 0.94  | 8.31E-06 | 6.65E+02  | 6.65E+02 |
| ENSG00000126945 | HNRNPH2        | 0.68 | -1.47 | -0.56 | 4.92E-06 | -6.64E+02 | 6.64E+02 |
| ENSG00000166741 | NNMT           | 0.69 | -1.44 | -0.53 | 4.71E-06 | -6.64E+02 | 6.64E+02 |
| ENSG00000182021 | RP11-381O7.3   | 1.90 | 1.90  | 0.92  | 8.16E-06 | 6.64E+02  | 6.64E+02 |
| ENSG00000127824 | TUBA4A         | 0.52 | -1.92 | -0.94 | 8.35E-06 | -6.63E+02 | 6.63E+02 |
| ENSG00000110074 | FOXRED1        | 0.68 | -1.46 | -0.55 | 4.94E-06 | -6.58E+02 | 6.58E+02 |
| ENSG00000105355 | PLIN3          | 1.43 | 1.43  | 0.52  | 4.75E-06 | 6.56E+02  | 6.56E+02 |
| ENSG00000251314 | CTD-2337A12.1  | 1.86 | 1.86  | 0.90  | 8.04E-06 | 6.56E+02  | 6.56E+02 |
| ENSG00000149798 | CDC42EP2       | 1.57 | 1.57  | 0.65  | 5.71E-06 | 6.56E+02  | 6.56E+02 |

|                 |                |      |       |       |          |           |          |
|-----------------|----------------|------|-------|-------|----------|-----------|----------|
| ENSG00000103121 | CMC2           | 0.71 | -1.40 | -0.49 | 4.59E-06 | -6.55E+02 | 6.55E+02 |
| ENSG00000079432 | CIC            | 1.54 | 1.54  | 0.63  | 5.59E-06 | 6.53E+02  | 6.53E+02 |
| ENSG00000197863 | ZNF790         | 1.62 | 1.62  | 0.70  | 6.21E-06 | 6.51E+02  | 6.51E+02 |
| ENSG00000075914 | EXOSC7         | 0.71 | -1.40 | -0.49 | 4.66E-06 | -6.51E+02 | 6.51E+02 |
| ENSG00000136807 | CDK9           | 0.69 | -1.46 | -0.54 | 5.03E-06 | -6.50E+02 | 6.50E+02 |
| ENSG00000106477 | CEP41          | 1.39 | 1.39  | 0.48  | 4.61E-06 | 6.50E+02  | 6.50E+02 |
| ENSG00000196810 | CTBP1-AS1      | 1.50 | 1.50  | 0.59  | 5.34E-06 | 6.50E+02  | 6.50E+02 |
| ENSG00000139645 | ANKRD52        | 1.41 | 1.41  | 0.50  | 4.74E-06 | 6.49E+02  | 6.49E+02 |
| ENSG00000141002 | TCF25          | 0.71 | -1.42 | -0.50 | 4.77E-06 | -6.49E+02 | 6.49E+02 |
| ENSG00000248275 | CTC-338M12.3   | 0.61 | -1.63 | -0.71 | 6.35E-06 | -6.47E+02 | 6.47E+02 |
| ENSG00000108439 | PNPO           | 0.71 | -1.41 | -0.50 | 4.85E-06 | -6.41E+02 | 6.41E+02 |
| ENSG00000126215 | XRCC3          | 0.69 | -1.46 | -0.54 | 5.18E-06 | -6.41E+02 | 6.41E+02 |
| ENSG00000165704 | HPRT1          | 0.59 | -1.69 | -0.76 | 7.08E-06 | -6.36E+02 | 6.36E+02 |
| ENSG00000137693 | YAP1           | 0.61 | -1.63 | -0.71 | 6.64E-06 | -6.34E+02 | 6.34E+02 |
| ENSG00000077463 | SIRT6          | 1.46 | 1.46  | 0.54  | 5.27E-06 | 6.34E+02  | 6.34E+02 |
| ENSG00000129235 | TXNDC17        | 0.67 | -1.50 | -0.58 | 5.58E-06 | -6.33E+02 | 6.33E+02 |
| ENSG00000169570 | DTWD2          | 0.58 | -1.71 | -0.77 | 7.32E-06 | -6.32E+02 | 6.32E+02 |
| ENSG00000173327 | MAP3K11        | 1.45 | 1.45  | 0.53  | 5.25E-06 | 6.31E+02  | 6.31E+02 |
| ENSG00000225733 | FGD5-AS1       | 0.70 | -1.43 | -0.52 | 5.18E-06 | -6.28E+02 | 6.28E+02 |
| ENSG00000132773 | TOE1           | 0.71 | -1.41 | -0.50 | 5.10E-06 | -6.25E+02 | 6.25E+02 |
| ENSG00000163312 | HELQ           | 1.43 | 1.43  | 0.52  | 5.24E-06 | 6.24E+02  | 6.24E+02 |
| ENSG00000069966 | GNB5           | 0.71 | -1.42 | -0.50 | 5.20E-06 | -6.22E+02 | 6.22E+02 |
| ENSG00000167861 | HID1           | 1.44 | 1.44  | 0.53  | 5.40E-06 | 6.21E+02  | 6.21E+02 |
| ENSG00000169139 | UBE2V2         | 1.45 | 1.45  | 0.53  | 5.45E-06 | 6.19E+02  | 6.19E+02 |
| ENSG00000186523 | FAM86B1        | 2.03 | 2.03  | 1.02  | 1.07E-05 | 6.19E+02  | 6.19E+02 |
| ENSG00000100575 | TMM9           | 0.70 | -1.44 | -0.52 | 5.41E-06 | -6.18E+02 | 6.18E+02 |
| ENSG00000112576 | CCND3          | 0.71 | -1.41 | -0.50 | 5.23E-06 | -6.17E+02 | 6.17E+02 |
| ENSG00000059691 | PET112         | 1.40 | 1.40  | 0.49  | 5.21E-06 | 6.15E+02  | 6.15E+02 |
| ENSG00000140961 | OSGIN1         | 1.57 | 1.57  | 0.65  | 6.62E-06 | 6.08E+02  | 6.08E+02 |
| ENSG00000171827 | ZNF570         | 1.56 | 1.56  | 0.64  | 6.56E-06 | 6.08E+02  | 6.08E+02 |
| ENSG00000214530 | STARD10        | 1.53 | 1.53  | 0.62  | 6.36E-06 | 6.07E+02  | 6.07E+02 |
| ENSG00000083817 | ZNF416         | 1.52 | 1.52  | 0.61  | 6.31E-06 | 6.07E+02  | 6.07E+02 |
| ENSG00000166780 | C16orf45       | 0.70 | -1.42 | -0.51 | 5.50E-06 | -6.07E+02 | 6.07E+02 |
| ENSG00000112851 | ERBB2IP        | 1.60 | 1.60  | 0.68  | 6.97E-06 | 6.06E+02  | 6.06E+02 |
| ENSG00000026025 | VIM            | 1.53 | 1.53  | 0.61  | 6.51E-06 | 6.00E+02  | 6.00E+02 |
| ENSG00000162614 | NEXN           | 0.65 | -1.54 | -0.62 | 6.60E-06 | -5.99E+02 | 5.99E+02 |
| ENSG00000169359 | SLC33A1        | 1.43 | 1.43  | 0.52  | 5.72E-06 | 5.99E+02  | 5.99E+02 |
| ENSG00000135587 | SMPD2          | 0.66 | -1.51 | -0.60 | 6.38E-06 | -5.98E+02 | 5.98E+02 |
| ENSG00000154262 | ABCA6          | 0.65 | -1.55 | -0.63 | 6.70E-06 | -5.97E+02 | 5.97E+02 |
| ENSG00000125648 | SLC25A23       | 1.44 | 1.44  | 0.53  | 5.86E-06 | 5.96E+02  | 5.96E+02 |
| ENSG00000183255 | PTTG1IP        | 1.43 | 1.43  | 0.52  | 5.81E-06 | 5.95E+02  | 5.95E+02 |
| ENSG00000240356 | RPL23AP7       | 1.56 | 1.56  | 0.64  | 6.98E-06 | 5.89E+02  | 5.89E+02 |
| ENSG00000138738 | PRDM5          | 0.64 | -1.57 | -0.65 | 7.10E-06 | -5.88E+02 | 5.88E+02 |
| ENSG00000153147 | SMARCA5        | 1.47 | 1.47  | 0.56  | 6.26E-06 | 5.88E+02  | 5.88E+02 |
| ENSG00000130734 | ATG4D          | 1.47 | 1.47  | 0.56  | 6.30E-06 | 5.87E+02  | 5.87E+02 |
| ENSG00000173465 | SSSCA1         | 0.70 | -1.43 | -0.52 | 5.97E-06 | -5.86E+02 | 5.86E+02 |
| ENSG00000211455 | STK38L         | 1.45 | 1.45  | 0.54  | 6.17E-06 | 5.84E+02  | 5.84E+02 |
| ENSG00000198331 | HYLS1          | 0.71 | -1.41 | -0.49 | 5.83E-06 | -5.83E+02 | 5.83E+02 |
| ENSG00000108622 | ICAM2          | 0.69 | -1.44 | -0.53 | 6.15E-06 | -5.82E+02 | 5.82E+02 |
| ENSG00000135002 | RFK            | 0.70 | -1.44 | -0.52 | 6.11E-06 | -5.82E+02 | 5.82E+02 |
| ENSG00000159131 | GART           | 0.68 | -1.48 | -0.56 | 6.45E-06 | -5.81E+02 | 5.81E+02 |
| ENSG00000129473 | BCL2L2         | 0.70 | -1.42 | -0.51 | 6.00E-06 | -5.81E+02 | 5.81E+02 |
| ENSG00000087191 | PSMC5          | 0.67 | -1.49 | -0.58 | 6.16E-06 | -5.80E+02 | 5.80E+02 |
| ENSG00000037757 | MRI1           | 0.71 | -1.41 | -0.50 | 5.98E-06 | -5.77E+02 | 5.77E+02 |
| ENSG00000181634 | TNFSF15        | 0.71 | -1.41 | -0.50 | 6.01E-06 | -5.76E+02 | 5.76E+02 |
| ENSG00000092094 | OSGEP          | 0.71 | -1.41 | -0.50 | 6.01E-06 | -5.76E+02 | 5.76E+02 |
| ENSG00000164403 | SHROOM1        | 0.66 | -1.52 | -0.60 | 6.98E-06 | -5.75E+02 | 5.75E+02 |
| ENSG00000124831 | LRRFIP1        | 1.43 | 1.43  | 0.52  | 6.24E-06 | 5.73E+02  | 5.73E+02 |
| ENSG00000151422 | FER            | 1.74 | 1.74  | 0.80  | 9.24E-06 | 5.73E+02  | 5.73E+02 |
| ENSG00000132688 | NES            | 1.44 | 1.44  | 0.53  | 6.36E-06 | 5.73E+02  | 5.73E+02 |
| ENSG00000151413 | NUBPL          | 1.43 | 1.43  | 0.51  | 6.26E-06 | 5.71E+02  | 5.71E+02 |
| ENSG00000171067 | C11orf24       | 1.43 | 1.43  | 0.51  | 6.29E-06 | 5.70E+02  | 5.70E+02 |
| ENSG00000131080 | EDA2R          | 1.46 | 1.46  | 0.55  | 6.62E-06 | 5.68E+02  | 5.68E+02 |
| ENSG00000101546 | RBFA           | 0.70 | -1.43 | -0.52 | 6.39E-06 | -5.66E+02 | 5.66E+02 |
| ENSG00000187164 | KIAA1598       | 1.40 | 1.40  | 0.48  | 6.11E-06 | 5.66E+02  | 5.66E+02 |
| ENSG00000145555 | MYO10          | 1.55 | 1.55  | 0.63  | 7.63E-06 | 5.60E+02  | 5.60E+02 |
| ENSG00000171988 | JMJD1C         | 1.77 | 1.77  | 0.82  | 1.00E-05 | 5.58E+02  | 5.58E+02 |
| ENSG00000121691 | CAT            | 0.71 | -1.41 | -0.49 | 6.39E-06 | -5.56E+02 | 5.56E+02 |
| ENSG00000197275 | RAD54B         | 0.60 | -1.67 | -0.74 | 9.03E-06 | -5.55E+02 | 5.55E+02 |
| ENSG00000196305 | IARS           | 0.69 | -1.44 | -0.53 | 6.76E-06 | -5.54E+02 | 5.54E+02 |
| ENSG00000106355 | LSM5           | 0.70 | -1.42 | -0.51 | 6.63E-06 | -5.53E+02 | 5.53E+02 |
| ENSG00000158402 | CDC25C         | 0.69 | -1.45 | -0.54 | 6.93E-06 | -5.52E+02 | 5.52E+02 |
| ENSG00000162385 | MAGOH          | 0.67 | -1.50 | -0.58 | 7.36E-06 | -5.52E+02 | 5.52E+02 |
| ENSG00000131238 | PPT1           | 0.71 | -1.42 | -0.50 | 6.61E-06 | -5.52E+02 | 5.52E+02 |
| ENSG00000261468 | RP11-1024P17.1 | 1.55 | 1.55  | 0.63  | 7.91E-06 | 5.51E+02  | 5.51E+02 |
| ENSG00000163291 | PAQR3          | 0.72 | -1.39 | -0.48 | 6.37E-06 | -5.51E+02 | 5.51E+02 |
| ENSG00000249087 | C1orf213       | 1.64 | 1.64  | 0.71  | 8.82E-06 | 5.51E+02  | 5.51E+02 |
| ENSG00000175110 | MRPS22         | 0.72 | -1.40 | -0.48 | 6.50E-06 | -5.48E+02 | 5.48E+02 |
| ENSG00000146242 | TPBG           | 1.49 | 1.49  | 0.58  | 7.46E-06 | 5.46E+02  | 5.46E+02 |

|                 |            |      |       |       |          |           |          |
|-----------------|------------|------|-------|-------|----------|-----------|----------|
| ENSG00000151612 | ZNF827     | 1.53 | 1.53  | 0.61  | 7.83E-06 | 5.46E+02  | 5.46E+02 |
| ENSG00000169891 | REPS2      | 1.50 | 1.50  | 0.58  | 7.58E-06 | 5.45E+02  | 5.45E+02 |
| ENSG00000166173 | LARP6      | 1.42 | 1.42  | 0.51  | 6.85E-06 | 5.44E+02  | 5.44E+02 |
| ENSG00000079462 | PAFAH1B3   | 0.69 | -1.45 | -0.54 | 7.17E-06 | -5.43E+02 | 5.43E+02 |
| ENSG00000180998 | GPR137C    | 1.80 | 1.80  | 0.85  | 1.11E-05 | 5.41E+02  | 5.41E+02 |
| ENSG00000154102 | C16orf74   | 1.42 | 1.42  | 0.51  | 6.93E-06 | 5.41E+02  | 5.41E+02 |
| ENSG00000214941 | ZSWIM7     | 1.46 | 1.46  | 0.54  | 7.26E-06 | 5.41E+02  | 5.41E+02 |
| ENSG00000138686 | BBS7       | 1.44 | 1.44  | 0.52  | 7.08E-06 | 5.39E+02  | 5.39E+02 |
| ENSG00000120458 | MSANTD2    | 0.71 | -1.41 | -0.50 | 6.84E-06 | -5.39E+02 | 5.39E+02 |
| ENSG00000124275 | MTRR       | 0.70 | -1.43 | -0.52 | 7.10E-06 | -5.37E+02 | 5.37E+02 |
| ENSG00000188511 | C22orf34   | 0.61 | -1.64 | -0.72 | 9.36E-06 | -5.37E+02 | 5.37E+02 |
| ENSG00000187239 | FNBP1      | 0.70 | -1.44 | -0.52 | 7.20E-06 | -5.36E+02 | 5.36E+02 |
| ENSG00000196998 | WDR45      | 1.43 | 1.43  | 0.52  | 7.13E-06 | 5.36E+02  | 5.36E+02 |
| ENSG00000198682 | PAPSS2     | 0.68 | -1.46 | -0.55 | 7.43E-06 | -5.36E+02 | 5.36E+02 |
| ENSG00000102034 | ELF4       | 1.43 | 1.43  | 0.51  | 7.11E-06 | 5.35E+02  | 5.35E+02 |
| ENSG00000147400 | CETN2      | 0.68 | -1.48 | -0.56 | 7.67E-06 | -5.34E+02 | 5.34E+02 |
| ENSG00000198917 | C9orf114   | 0.71 | -1.41 | -0.49 | 6.96E-06 | -5.33E+02 | 5.33E+02 |
| ENSG00000144554 | FANCD2     | 0.71 | -1.41 | -0.50 | 7.04E-06 | -5.32E+02 | 5.32E+02 |
| ENSG00000174718 | KIAA1551   | 1.54 | 1.54  | 0.62  | 8.38E-06 | 5.32E+02  | 5.32E+02 |
| ENSG00000253873 | PCDHGA11   | 1.75 | 1.75  | 0.81  | 1.09E-05 | 5.30E+02  | 5.30E+02 |
| ENSG00000213085 | CCDC19     | 1.92 | 1.92  | 0.94  | 1.32E-05 | 5.30E+02  | 5.30E+02 |
| ENSG00000110435 | PDHX       | 1.40 | 1.40  | 0.49  | 7.04E-06 | 5.30E+02  | 5.30E+02 |
| ENSG00000198440 | ZNF583     | 1.57 | 1.57  | 0.65  | 8.76E-06 | 5.30E+02  | 5.30E+02 |
| ENSG00000118276 | B4GALT6    | 1.41 | 1.41  | 0.50  | 7.09E-06 | 5.29E+02  | 5.29E+02 |
| ENSG00000180304 | OAZ2       | 0.61 | -1.63 | -0.70 | 9.50E-06 | -5.28E+02 | 5.28E+02 |
| ENSG00000167325 | RRM1       | 0.70 | -1.42 | -0.51 | 7.27E-06 | -5.28E+02 | 5.28E+02 |
| ENSG00000217128 | FNIP1      | 1.44 | 1.44  | 0.53  | 7.52E-06 | 5.26E+02  | 5.26E+02 |
| ENSG00000109089 | CDR2L      | 1.41 | 1.41  | 0.49  | 7.18E-06 | 5.25E+02  | 5.25E+02 |
| ENSG00000123094 | RASSF8     | 1.47 | 1.47  | 0.56  | 7.86E-06 | 5.25E+02  | 5.25E+02 |
| ENSG00000125810 | CD93       | 1.43 | 1.43  | 0.52  | 7.44E-06 | 5.25E+02  | 5.25E+02 |
| ENSG00000167393 | PPP2R3B    | 0.65 | -1.53 | -0.61 | 8.50E-06 | -5.24E+02 | 5.24E+02 |
| ENSG00000224470 | ATXN1L     | 1.41 | 1.41  | 0.49  | 7.29E-06 | 5.22E+02  | 5.22E+02 |
| ENSG00000184661 | CDCA2      | 0.70 | -1.44 | -0.52 | 7.59E-06 | -5.21E+02 | 5.21E+02 |
| ENSG00000150510 | FAM124A    | 0.65 | -1.55 | -0.63 | 8.82E-06 | -5.21E+02 | 5.21E+02 |
| ENSG00000105472 | CLEC11A    | 0.64 | -1.56 | -0.64 | 9.01E-06 | -5.18E+02 | 5.18E+02 |
| ENSG00000156990 | RPUSD3     | 0.70 | -1.43 | -0.52 | 7.80E-06 | -5.12E+02 | 5.12E+02 |
| ENSG00000077454 | LRCH4      | 0.69 | -1.44 | -0.53 | 7.97E-06 | -5.12E+02 | 5.12E+02 |
| ENSG00000198695 | MT-ND6     | 0.37 | -2.69 | -1.43 | 2.80E-05 | -5.09E+02 | 5.09E+02 |
| ENSG00000104332 | SFRP1      | 0.66 | -1.51 | -0.59 | 8.81E-06 | -5.07E+02 | 5.07E+02 |
| ENSG00000123472 | ATPAF1     | 0.72 | -1.39 | -0.48 | 7.61E-06 | -5.06E+02 | 5.06E+02 |
| ENSG00000197694 | SPTAN1     | 1.43 | 1.43  | 0.52  | 8.14E-06 | 5.01E+02  | 5.01E+02 |
| ENSG00000125875 | TBC1D20    | 1.38 | 1.38  | 0.47  | 7.66E-06 | 5.00E+02  | 5.00E+02 |
| ENSG00000171604 | CXXC5      | 0.53 | -1.87 | -0.90 | 1.42E-05 | -4.98E+02 | 4.98E+02 |
| ENSG00000166347 | CYB5A      | 0.72 | -1.40 | -0.48 | 7.87E-06 | -4.98E+02 | 4.98E+02 |
| ENSG00000225830 | ERCC6      | 0.72 | -1.39 | -0.47 | 7.77E-06 | -4.97E+02 | 4.97E+02 |
| ENSG00000100744 | GSKIP      | 1.51 | 1.51  | 0.60  | 9.24E-06 | 4.97E+02  | 4.97E+02 |
| ENSG00000138778 | CENPE      | 0.66 | -1.52 | -0.61 | 9.41E-06 | -4.96E+02 | 4.96E+02 |
| ENSG00000004139 | SARM1      | 1.63 | 1.63  | 0.71  | 1.10E-05 | 4.91E+02  | 4.91E+02 |
| ENSG00000135763 | URB2       | 0.71 | -1.41 | -0.49 | 8.23E-06 | -4.90E+02 | 4.90E+02 |
| ENSG00000215424 | MCM3AP-AS1 | 0.56 | -1.80 | -0.84 | 1.35E-05 | -4.89E+02 | 4.89E+02 |
| ENSG00000173041 | ZNF680     | 0.70 | -1.42 | -0.51 | 8.55E-06 | -4.87E+02 | 4.87E+02 |
| ENSG00000138074 | SLC5A6     | 0.72 | -1.40 | -0.48 | 8.29E-06 | -4.85E+02 | 4.85E+02 |
| ENSG00000183137 | CEP57L1    | 0.69 | -1.44 | -0.53 | 8.88E-06 | -4.84E+02 | 4.84E+02 |
| ENSG00000119227 | PIGZ       | 0.52 | -1.92 | -0.94 | 1.60E-05 | -4.80E+02 | 4.80E+02 |
| ENSG00000106799 | TGFBR1     | 1.40 | 1.40  | 0.48  | 8.55E-06 | 4.79E+02  | 4.79E+02 |
| ENSG00000182742 | HOXB4      | 1.41 | 1.41  | 0.50  | 8.82E-06 | 4.76E+02  | 4.76E+02 |
| ENSG00000149289 | ZC3H12C    | 1.42 | 1.42  | 0.50  | 8.93E-06 | 4.74E+02  | 4.74E+02 |
| ENSG00000089006 | SNX5       | 0.71 | -1.41 | -0.50 | 8.99E-06 | -4.71E+02 | 4.71E+02 |
| ENSG00000107679 | PLEKHA1    | 1.42 | 1.42  | 0.51  | 9.12E-06 | 4.71E+02  | 4.71E+02 |
| ENSG00000011105 | TSPAN9     | 1.44 | 1.44  | 0.52  | 9.30E-06 | 4.71E+02  | 4.71E+02 |
| ENSG00000183172 | C22orf32   | 0.55 | -1.82 | -0.86 | 1.50E-05 | -4.70E+02 | 4.70E+02 |
| ENSG00000115163 | CENPA      | 0.71 | -1.40 | -0.49 | 8.95E-06 | -4.69E+02 | 4.69E+02 |
| ENSG00000213619 | NDUFS3     | 0.72 | -1.39 | -0.48 | 8.90E-06 | -4.67E+02 | 4.67E+02 |
| ENSG00000119139 | TJP2       | 1.47 | 1.47  | 0.56  | 9.97E-06 | 4.65E+02  | 4.65E+02 |
| ENSG00000112773 | FAM46A     | 1.68 | 1.68  | 0.75  | 1.31E-05 | 4.63E+02  | 4.63E+02 |
| ENSG00000162909 | CAPN2      | 1.43 | 1.43  | 0.52  | 9.59E-06 | 4.62E+02  | 4.62E+02 |
| ENSG00000198855 | FICD       | 0.65 | -1.54 | -0.63 | 1.12E-05 | -4.61E+02 | 4.61E+02 |
| ENSG00000165338 | HECTD2     | 1.65 | 1.65  | 0.73  | 1.29E-05 | 4.60E+02  | 4.60E+02 |
| ENSG00000184903 | IMMP2L     | 0.62 | -1.61 | -0.69 | 1.23E-05 | -4.59E+02 | 4.59E+02 |
| ENSG00000196511 | TPK1       | 0.70 | -1.42 | -0.51 | 9.58E-06 | -4.59E+02 | 4.59E+02 |
| ENSG00000146373 | RNF217     | 1.53 | 1.53  | 0.61  | 1.12E-05 | 4.57E+02  | 4.57E+02 |
| ENSG00000104872 | PIH1D1     | 0.72 | -1.39 | -0.48 | 9.32E-06 | -4.56E+02 | 4.56E+02 |
| ENSG00000185621 | LMLN       | 0.58 | -1.74 | -0.80 | 1.45E-05 | -4.56E+02 | 4.56E+02 |
| ENSG00000146729 | GBAS       | 0.71 | -1.40 | -0.48 | 9.45E-06 | -4.55E+02 | 4.55E+02 |
| ENSG00000158113 | LRRC43     | 1.85 | 1.85  | 0.88  | 1.66E-05 | 4.53E+02  | 4.53E+02 |
| ENSG00000103249 | CLCN7      | 1.48 | 1.48  | 0.57  | 1.08E-05 | 4.52E+02  | 4.52E+02 |
| ENSG00000184557 | SOCS3      | 0.71 | -1.41 | -0.50 | 9.81E-06 | -4.50E+02 | 4.50E+02 |
| ENSG00000270141 | TERC       | 0.70 | -1.43 | -0.52 | 1.01E-05 | -4.50E+02 | 4.50E+02 |
| ENSG00000103502 | CDIPT      | 0.72 | -1.39 | -0.48 | 9.56E-06 | -4.50E+02 | 4.50E+02 |

|                 |               |      |       |       |          |           |          |
|-----------------|---------------|------|-------|-------|----------|-----------|----------|
| ENSG00000163607 | GTPBP8        | 0.71 | -1.41 | -0.49 | 9.94E-06 | -4.46E+02 | 4.46E+02 |
| ENSG00000170558 | CDH2          | 1.43 | 1.43  | 0.52  | 1.03E-05 | 4.46E+02  | 4.46E+02 |
| ENSG00000167315 | ACAA2         | 1.40 | 1.40  | 0.48  | 9.80E-06 | 4.46E+02  | 4.46E+02 |
| ENSG00000155957 | TMBIM4        | 0.71 | -1.42 | -0.50 | 1.01E-05 | -4.45E+02 | 4.45E+02 |
| ENSG00000087008 | ACOX3         | 0.71 | -1.42 | -0.50 | 1.02E-05 | -4.43E+02 | 4.43E+02 |
| ENSG00000158691 | ZSCAN12       | 0.67 | -1.48 | -0.57 | 1.13E-05 | -4.43E+02 | 4.43E+02 |
| ENSG00000114374 | USP9Y         | 1.77 | 1.77  | 0.83  | 1.62E-05 | 4.41E+02  | 4.41E+02 |
| ENSG00000213903 | LTB4R         | 1.66 | 1.66  | 0.73  | 1.42E-05 | 4.40E+02  | 4.40E+02 |
| ENSG00000186638 | KIF24         | 0.67 | -1.49 | -0.58 | 1.14E-05 | -4.40E+02 | 4.40E+02 |
| ENSG00000119862 | LGALS1        | 1.46 | 1.46  | 0.55  | 1.11E-05 | 4.40E+02  | 4.40E+02 |
| ENSG00000088836 | SLC4A11       | 1.55 | 1.55  | 0.63  | 1.24E-05 | 4.40E+02  | 4.40E+02 |
| ENSG00000141642 | ELAC1         | 1.46 | 1.46  | 0.55  | 1.10E-05 | 4.40E+02  | 4.40E+02 |
| ENSG00000130038 | EFCAB4B       | 0.68 | -1.46 | -0.55 | 1.11E-05 | -4.39E+02 | 4.39E+02 |
| ENSG00000146670 | CDC45         | 0.71 | -1.41 | -0.50 | 1.04E-05 | -4.38E+02 | 4.38E+02 |
| ENSG00000102870 | ZNF629        | 0.68 | -1.47 | -0.55 | 1.15E-05 | -4.34E+02 | 4.34E+02 |
| ENSG00000103111 | MON1B         | 1.47 | 1.47  | 0.56  | 1.15E-05 | 4.34E+02  | 4.34E+02 |
| ENSG00000213347 | MXD3          | 0.67 | -1.48 | -0.57 | 1.17E-05 | -4.34E+02 | 4.34E+02 |
| ENSG00000130772 | MED18         | 1.46 | 1.46  | 0.55  | 1.14E-05 | 4.33E+02  | 4.33E+02 |
| ENSG00000168010 | ATG16L2       | 0.64 | -1.56 | -0.64 | 1.30E-05 | -4.33E+02 | 4.33E+02 |
| ENSG00000182957 | SPATA13       | 0.69 | -1.45 | -0.54 | 1.13E-05 | -4.32E+02 | 4.32E+02 |
| ENSG00000162437 | RAVER2        | 0.72 | -1.39 | -0.47 | 1.03E-05 | -4.32E+02 | 4.32E+02 |
| ENSG00000101974 | ATP11C        | 1.55 | 1.55  | 0.63  | 1.29E-05 | 4.32E+02  | 4.32E+02 |
| ENSG00000131389 | SLC6A6        | 1.42 | 1.42  | 0.51  | 1.10E-05 | 4.30E+02  | 4.30E+02 |
| ENSG00000273319 | AC058791.1    | 1.65 | 1.65  | 0.72  | 1.48E-05 | 4.28E+02  | 4.28E+02 |
| ENSG00000113742 | CPEB4         | 1.41 | 1.41  | 0.49  | 1.08E-05 | 4.28E+02  | 4.28E+02 |
| ENSG00000138162 | TACC2         | 1.71 | 1.71  | 0.77  | 1.60E-05 | 4.27E+02  | 4.27E+02 |
| ENSG00000121542 | SEC22A        | 0.70 | -1.43 | -0.51 | 1.12E-05 | -4.27E+02 | 4.27E+02 |
| ENSG00000057019 | DCBLD2        | 1.41 | 1.41  | 0.50  | 1.10E-05 | 4.27E+02  | 4.27E+02 |
| ENSG00000003509 | NDUFAF7       | 0.72 | -1.39 | -0.47 | 1.07E-05 | -4.24E+02 | 4.24E+02 |
| ENSG00000245680 | ZNF585B       | 1.47 | 1.47  | 0.55  | 1.20E-05 | 4.24E+02  | 4.24E+02 |
| ENSG00000116237 | ICMT          | 0.71 | -1.42 | -0.50 | 1.13E-05 | -4.21E+02 | 4.21E+02 |
| ENSG00000154175 | ABI3BP        | 0.67 | -1.48 | -0.57 | 1.25E-05 | -4.20E+02 | 4.20E+02 |
| ENSG00000075539 | FRYL          | 1.70 | 1.70  | 0.76  | 1.64E-05 | 4.19E+02  | 4.19E+02 |
| ENSG00000161048 | NAPEPLD       | 0.64 | -1.56 | -0.64 | 1.39E-05 | -4.19E+02 | 4.19E+02 |
| ENSG00000103051 | COG4          | 1.43 | 1.43  | 0.51  | 1.16E-05 | 4.19E+02  | 4.19E+02 |
| ENSG00000134056 | MRPS36        | 0.70 | -1.42 | -0.51 | 1.16E-05 | -4.19E+02 | 4.19E+02 |
| ENSG00000198585 | NUDT16        | 1.43 | 1.43  | 0.51  | 1.16E-05 | 4.19E+02  | 4.19E+02 |
| ENSG00000101868 | POLA1         | 0.71 | -1.40 | -0.49 | 1.13E-05 | -4.18E+02 | 4.18E+02 |
| ENSG00000156218 | ADAMTSL3      | 1.69 | 1.69  | 0.75  | 1.64E-05 | 4.16E+02  | 4.16E+02 |
| ENSG00000140859 | KIFC3         | 1.39 | 1.39  | 0.47  | 1.13E-05 | 4.14E+02  | 4.14E+02 |
| ENSG00000261490 | RP11-448G15.3 | 1.59 | 1.59  | 0.67  | 1.48E-05 | 4.13E+02  | 4.13E+02 |
| ENSG00000112769 | LAMA4         | 1.42 | 1.42  | 0.50  | 1.17E-05 | 4.13E+02  | 4.13E+02 |
| ENSG00000123992 | DNPEP         | 0.73 | -1.38 | -0.46 | 1.11E-05 | -4.13E+02 | 4.13E+02 |
| ENSG00000171960 | PPIH          | 0.73 | -1.38 | -0.46 | 1.12E-05 | -4.12E+02 | 4.12E+02 |
| ENSG00000107331 | ABCA2         | 0.64 | -1.57 | -0.65 | 1.45E-05 | -4.12E+02 | 4.12E+02 |
| ENSG00000145743 | FBXL17        | 1.41 | 1.41  | 0.50  | 1.18E-05 | 4.12E+02  | 4.12E+02 |
| ENSG00000162390 | ACOT11        | 0.63 | -1.59 | -0.67 | 1.51E-05 | -4.11E+02 | 4.11E+02 |
| ENSG00000134748 | PRPF38A       | 0.73 | -1.38 | -0.46 | 1.13E-05 | -4.09E+02 | 4.09E+02 |
| ENSG00000109534 | GAR1          | 0.65 | -1.54 | -0.62 | 1.42E-05 | -4.09E+02 | 4.09E+02 |
| ENSG00000167972 | ABCA3         | 1.52 | 1.52  | 0.61  | 1.39E-05 | 4.08E+02  | 4.08E+02 |
| ENSG00000064042 | LIMCH1        | 0.72 | -1.39 | -0.48 | 1.21E-05 | -4.00E+02 | 4.00E+02 |
| ENSG00000149636 | DSN1          | 0.72 | -1.39 | -0.48 | 1.22E-05 | -4.00E+02 | 4.00E+02 |
| ENSG00000104835 | SARS2         | 0.61 | -1.63 | -0.71 | 1.68E-05 | -3.99E+02 | 3.99E+02 |
| ENSG00000149564 | ESAM          | 1.43 | 1.43  | 0.52  | 1.31E-05 | 3.96E+02  | 3.96E+02 |
| ENSG00000053438 | NNAT          | 1.62 | 1.62  | 0.69  | 1.68E-05 | 3.94E+02  | 3.94E+02 |
| ENSG00000269386 | RAB11B-AS1    | 1.50 | 1.50  | 0.59  | 1.46E-05 | 3.93E+02  | 3.93E+02 |
| ENSG00000118579 | MED28         | 0.68 | -1.47 | -0.56 | 1.41E-05 | -3.92E+02 | 3.92E+02 |
| ENSG00000182307 | C8orf33       | 0.72 | -1.39 | -0.47 | 1.26E-05 | -3.91E+02 | 3.91E+02 |
| ENSG00000119403 | PHF19         | 0.70 | -1.42 | -0.51 | 1.33E-05 | -3.90E+02 | 3.90E+02 |
| ENSG00000198947 | DMD           | 0.68 | -1.48 | -0.57 | 1.45E-05 | -3.88E+02 | 3.88E+02 |
| ENSG00000101751 | POLI          | 1.45 | 1.45  | 0.53  | 1.40E-05 | 3.88E+02  | 3.88E+02 |
| ENSG00000083223 | ZCCHC6        | 1.58 | 1.58  | 0.66  | 1.66E-05 | 3.87E+02  | 3.87E+02 |
| ENSG00000147536 | GINS4         | 0.72 | -1.38 | -0.47 | 1.28E-05 | -3.86E+02 | 3.86E+02 |
| ENSG00000141447 | OSBPL1A       | 0.70 | -1.43 | -0.51 | 1.39E-05 | -3.83E+02 | 3.83E+02 |
| ENSG00000101040 | ZMYND8        | 1.42 | 1.42  | 0.51  | 1.38E-05 | 3.82E+02  | 3.82E+02 |
| ENSG00000257122 | RRN3P3        | 0.64 | -1.55 | -0.63 | 1.66E-05 | -3.81E+02 | 3.81E+02 |
| ENSG00000157191 | NECAP2        | 1.40 | 1.40  | 0.49  | 1.36E-05 | 3.80E+02  | 3.80E+02 |
| ENSG00000067992 | PDK3          | 0.66 | -1.52 | -0.61 | 1.62E-05 | -3.79E+02 | 3.79E+02 |
| ENSG00000082781 | ITGB5         | 1.41 | 1.41  | 0.49  | 1.38E-05 | 3.79E+02  | 3.79E+02 |
| ENSG00000169131 | ZNF354A       | 1.41 | 1.41  | 0.49  | 1.40E-05 | 3.76E+02  | 3.76E+02 |
| ENSG00000161714 | PLCD3         | 1.46 | 1.46  | 0.54  | 1.50E-05 | 3.76E+02  | 3.76E+02 |
| ENSG00000164609 | SLU7          | 1.39 | 1.39  | 0.48  | 1.38E-05 | 3.75E+02  | 3.75E+02 |
| ENSG00000173040 | EVC2          | 1.52 | 1.52  | 0.60  | 1.65E-05 | 3.75E+02  | 3.75E+02 |
| ENSG00000196150 | ZNF250        | 1.42 | 1.42  | 0.51  | 1.45E-05 | 3.75E+02  | 3.75E+02 |
| ENSG00000141644 | MBD1          | 0.72 | -1.38 | -0.46 | 1.36E-05 | -3.74E+02 | 3.74E+02 |
| ENSG00000121940 | CLCC1         | 0.70 | -1.42 | -0.51 | 1.45E-05 | -3.74E+02 | 3.74E+02 |
|                 | RP11-325F22.3 | 1.89 | 1.89  | 0.92  | 2.56E-05 | 3.74E+02  | 3.74E+02 |
| ENSG00000136147 | PHF11         | 0.66 | -1.51 | -0.59 | 1.64E-05 | -3.73E+02 | 3.73E+02 |
| ENSG00000011258 | MBTD1         | 1.40 | 1.40  | 0.49  | 1.45E-05 | 3.69E+02  | 3.69E+02 |

|                 |            |      |       |       |          |           |          |
|-----------------|------------|------|-------|-------|----------|-----------|----------|
| ENSG00000107672 | NSMCE4A    | 0.72 | -1.39 | -0.47 | 1.41E-05 | -3.69E+02 | 3.69E+02 |
| ENSG00000157881 | PANK4      | 0.72 | -1.39 | -0.47 | 1.43E-05 | -3.67E+02 | 3.67E+02 |
| ENSG00000183718 | TRIM52     | 1.60 | 1.60  | 0.68  | 1.91E-05 | 3.66E+02  | 3.66E+02 |
| ENSG00000133195 | SLC39A11   | 1.50 | 1.50  | 0.58  | 1.69E-05 | 3.65E+02  | 3.65E+02 |
| ENSG00000066135 | KDM4A      | 0.71 | -1.40 | -0.48 | 1.47E-05 | -3.65E+02 | 3.65E+02 |
| ENSG00000101000 | PROC4      | 0.70 | -1.42 | -0.51 | 1.53E-05 | -3.64E+02 | 3.64E+02 |
| ENSG00000169967 | MAP3K2     | 1.44 | 1.44  | 0.53  | 1.58E-05 | 3.63E+02  | 3.63E+02 |
| ENSG00000134152 | KATNB1     | 0.72 | -1.39 | -0.48 | 1.47E-05 | -3.63E+02 | 3.63E+02 |
| ENSG00000130827 | PLXNA3     | 0.67 | -1.49 | -0.57 | 1.69E-05 | -3.62E+02 | 3.62E+02 |
| ENSG00000172270 | BSG        | 1.56 | 1.56  | 0.64  | 1.85E-05 | 3.62E+02  | 3.62E+02 |
| ENSG00000120334 | CENPL      | 0.73 | -1.37 | -0.46 | 1.45E-05 | -3.61E+02 | 3.61E+02 |
| ENSG00000101333 | PLCB4      | 0.48 | -2.07 | -1.05 | 3.28E-05 | -3.61E+02 | 3.61E+02 |
| ENSG00000179409 | GEMIN4     | 0.66 | -1.52 | -0.60 | 1.77E-05 | -3.61E+02 | 3.61E+02 |
| ENSG00000213085 | CCDC75     | 0.72 | -1.40 | -0.48 | 1.51E-05 | -3.59E+02 | 3.59E+02 |
| ENSG00000188211 | NCR3LG1    | 0.70 | -1.42 | -0.51 | 1.57E-05 | -3.59E+02 | 3.59E+02 |
| ENSG00000175606 | TMEM70     | 0.70 | -1.43 | -0.51 | 1.58E-05 | -3.59E+02 | 3.59E+02 |
| ENSG00000165389 | SPTSSA     | 0.64 | -1.56 | -0.64 | 1.91E-05 | -3.57E+02 | 3.57E+02 |
| ENSG00000108797 | CNTNAP1    | 0.64 | -1.56 | -0.64 | 1.93E-05 | -3.56E+02 | 3.56E+02 |
| ENSG00000146426 | TIAM2      | 0.66 | -1.51 | -0.60 | 1.82E-05 | -3.54E+02 | 3.54E+02 |
| ENSG00000137312 | FLOT1      | 0.72 | -1.38 | -0.47 | 1.53E-05 | -3.53E+02 | 3.53E+02 |
| ENSG00000119777 | TMEM214    | 0.72 | -1.40 | -0.48 | 1.57E-05 | -3.53E+02 | 3.53E+02 |
| ENSG00000183850 | ZNF730     | 1.72 | 1.72  | 0.78  | 2.40E-05 | 3.50E+02  | 3.50E+02 |
| ENSG00000182141 | ZNF708     | 1.53 | 1.53  | 0.61  | 1.90E-05 | 3.50E+02  | 3.50E+02 |
| ENSG00000108448 | TRIM16L    | 1.53 | 1.53  | 0.61  | 1.91E-05 | 3.49E+02  | 3.49E+02 |
| ENSG00000188026 | RILPL1     | 1.43 | 1.43  | 0.51  | 1.67E-05 | 3.49E+02  | 3.49E+02 |
| ENSG00000163867 | ZMYM6      | 1.41 | 1.41  | 0.50  | 1.65E-05 | 3.48E+02  | 3.48E+02 |
| ENSG00000140307 | GTF2A2     | 0.71 | -1.40 | -0.49 | 1.64E-05 | -3.46E+02 | 3.46E+02 |
| ENSG00000102935 | ZNF423     | 0.58 | -1.73 | -0.79 | 2.50E-05 | -3.45E+02 | 3.45E+02 |
| ENSG00000229056 | AC020571.3 | 2.20 | 2.20  | 1.14  | 4.06E-05 | 3.45E+02  | 3.45E+02 |
| ENSG00000160199 | PKNOX1     | 1.40 | 1.40  | 0.49  | 1.65E-05 | 3.45E+02  | 3.45E+02 |
| ENSG00000197070 | ARRDC1     | 0.66 | -1.51 | -0.59 | 1.92E-05 | -3.44E+02 | 3.44E+02 |
| ENSG00000109445 | ZNF330     | 0.71 | -1.40 | -0.49 | 1.68E-05 | -3.43E+02 | 3.43E+02 |
| ENSG00000101160 | CTSZ       | 1.40 | 1.40  | 0.48  | 1.70E-05 | 3.39E+02  | 3.39E+02 |
| ENSG00000071967 | CYBRD1     | 1.41 | 1.41  | 0.49  | 1.72E-05 | 3.38E+02  | 3.38E+02 |
| ENSG00000166086 | JAM3       | 1.43 | 1.43  | 0.51  | 1.79E-05 | 3.37E+02  | 3.37E+02 |
| ENSG00000127663 | KDM4B      | 1.38 | 1.38  | 0.47  | 1.68E-05 | 3.36E+02  | 3.36E+02 |
| ENSG00000244968 | LIFR-AS1   | 1.76 | 1.76  | 0.81  | 2.73E-05 | 3.36E+02  | 3.36E+02 |
| ENSG00000176624 | MEX3C      | 1.41 | 1.41  | 0.49  | 1.75E-05 | 3.36E+02  | 3.36E+02 |
| ENSG00000145337 | PYURF      | 0.69 | -1.44 | -0.53 | 1.87E-05 | -3.34E+02 | 3.34E+02 |
| ENSG00000165171 | WBSCR27    | 1.76 | 1.76  | 0.81  | 2.79E-05 | 3.33E+02  | 3.33E+02 |
| ENSG00000167548 | MLL2       | 1.42 | 1.42  | 0.50  | 1.82E-05 | 3.32E+02  | 3.32E+02 |
| ENSG00000163322 | FAM175A    | 0.62 | -1.61 | -0.68 | 2.35E-05 | -3.32E+02 | 3.32E+02 |
| ENSG00000143641 | GALNT2     | 1.41 | 1.41  | 0.50  | 1.82E-05 | 3.31E+02  | 3.31E+02 |
| ENSG00000159921 | GNE        | 0.73 | -1.37 | -0.45 | 1.72E-05 | -3.30E+02 | 3.30E+02 |
| ENSG00000163611 | SPICE1     | 0.71 | -1.40 | -0.49 | 1.82E-05 | -3.28E+02 | 3.28E+02 |
| ENSG00000165861 | ZFYVE1     | 1.37 | 1.37  | 0.45  | 1.75E-05 | 3.28E+02  | 3.28E+02 |
| ENSG00000198720 | ANKRD13B   | 1.49 | 1.49  | 0.58  | 2.07E-05 | 3.28E+02  | 3.28E+02 |
| ENSG00000178904 | DPY19L3    | 0.71 | -1.40 | -0.49 | 1.83E-05 | -3.28E+02 | 3.28E+02 |
| ENSG00000110497 | AMBRA1     | 1.42 | 1.42  | 0.51  | 1.89E-05 | 3.27E+02  | 3.27E+02 |
| ENSG00000164031 | DNAJB14    | 0.66 | -1.52 | -0.61 | 2.17E-05 | -3.27E+02 | 3.27E+02 |
| ENSG00000135622 | SEMA4F     | 0.66 | -1.52 | -0.61 | 2.19E-05 | -3.26E+02 | 3.26E+02 |
| ENSG00000111196 | MAGOHB     | 0.70 | -1.43 | -0.52 | 1.94E-05 | -3.26E+02 | 3.26E+02 |
| ENSG00000131634 | TMEM204    | 1.51 | 1.51  | 0.60  | 2.16E-05 | 3.25E+02  | 3.25E+02 |
| ENSG00000049656 | CLPTM1L    | 0.71 | -1.40 | -0.49 | 1.87E-05 | -3.24E+02 | 3.24E+02 |
| ENSG00000261801 | LOXL1-AS1  | 0.56 | -1.79 | -0.84 | 3.04E-05 | -3.24E+02 | 3.24E+02 |
| ENSG00000138092 | CENPO      | 0.71 | -1.42 | -0.50 | 1.91E-05 | -3.24E+02 | 3.24E+02 |
| ENSG00000132718 | SYT11      | 0.72 | -1.39 | -0.47 | 1.85E-05 | -3.22E+02 | 3.22E+02 |
| ENSG00000124749 | COL21A1    | 0.59 | -1.70 | -0.76 | 2.77E-05 | -3.22E+02 | 3.22E+02 |
| ENSG00000129353 | SLC44A2    | 1.59 | 1.59  | 0.67  | 2.45E-05 | 3.21E+02  | 3.21E+02 |
| ENSG00000269821 | KCNQ1OT1   | 1.39 | 1.39  | 0.48  | 1.88E-05 | 3.21E+02  | 3.21E+02 |
| ENSG00000187535 | IFT140     | 1.43 | 1.43  | 0.51  | 1.98E-05 | 3.21E+02  | 3.21E+02 |
| ENSG00000089289 | IGBP1      | 1.38 | 1.38  | 0.46  | 1.84E-05 | 3.20E+02  | 3.20E+02 |
| ENSG00000136636 | KCTD3      | 0.70 | -1.43 | -0.52 | 2.02E-05 | -3.18E+02 | 3.18E+02 |
| ENSG00000005893 | LAMP2      | 1.41 | 1.41  | 0.50  | 1.96E-05 | 3.18E+02  | 3.18E+02 |
| ENSG00000165996 | PTPLA      | 0.70 | -1.42 | -0.51 | 2.00E-05 | -3.18E+02 | 3.18E+02 |
| ENSG00000159873 | CCDC117    | 0.72 | -1.39 | -0.47 | 1.91E-05 | -3.18E+02 | 3.18E+02 |
| ENSG00000148677 | ANKRD1     | 0.71 | -1.40 | -0.49 | 1.96E-05 | -3.17E+02 | 3.17E+02 |
| ENSG00000092036 | HAUS4      | 0.71 | -1.41 | -0.50 | 1.98E-05 | -3.17E+02 | 3.17E+02 |
| ENSG00000185485 | SDHAP1     | 0.60 | -1.67 | -0.74 | 2.78E-05 | -3.16E+02 | 3.16E+02 |
| ENSG00000102543 | CDADC1     | 1.49 | 1.49  | 0.58  | 2.24E-05 | 3.16E+02  | 3.16E+02 |
| ENSG00000213445 | SIPA1      | 1.38 | 1.38  | 0.46  | 1.90E-05 | 3.16E+02  | 3.16E+02 |
| ENSG00000177700 | POLR2L     | 0.71 | -1.41 | -0.49 | 1.99E-05 | -3.15E+02 | 3.15E+02 |
| ENSG00000168874 | ATO8H      | 1.41 | 1.41  | 0.50  | 2.02E-05 | 3.15E+02  | 3.15E+02 |
| ENSG00000019144 | PHLDB1     | 1.40 | 1.40  | 0.49  | 2.01E-05 | 3.12E+02  | 3.12E+02 |
| ENSG00000165891 | E2F7       | 1.39 | 1.39  | 0.48  | 1.99E-05 | 3.12E+02  | 3.12E+02 |
| ENSG00000119723 | COQ6       | 0.71 | -1.41 | -0.49 | 2.03E-05 | -3.12E+02 | 3.12E+02 |
| ENSG00000126602 | TRAP1      | 0.68 | -1.48 | -0.56 | 2.24E-05 | -3.12E+02 | 3.12E+02 |
| ENSG00000134363 | FST        | 0.56 | -1.77 | -0.83 | 3.26E-05 | -3.11E+02 | 3.11E+02 |
| ENSG00000177125 | ZBTB34     | 1.38 | 1.38  | 0.46  | 1.97E-05 | 3.10E+02  | 3.10E+02 |

|                 |             |      |       |       |          |           |          |
|-----------------|-------------|------|-------|-------|----------|-----------|----------|
| ENSG00000164048 | ZNF589      | 0.71 | -1.40 | -0.49 | 2.05E-05 | -3.10E+02 | 3.10E+02 |
| ENSG00000164086 | DUSP7       | 1.39 | 1.39  | 0.48  | 2.02E-05 | 3.10E+02  | 3.10E+02 |
| ENSG00000254635 | WAC-AS1     | 0.71 | -1.41 | -0.50 | 2.09E-05 | -3.09E+02 | 3.09E+02 |
| ENSG00000101447 | FAM83D      | 0.70 | -1.43 | -0.52 | 2.18E-05 | -3.07E+02 | 3.07E+02 |
| ENSG00000188313 | PLSCR1      | 0.73 | -1.37 | -0.46 | 2.00E-05 | -3.07E+02 | 3.07E+02 |
| ENSG00000140326 | CDAN1       | 0.71 | -1.40 | -0.49 | 2.09E-05 | -3.07E+02 | 3.07E+02 |
| ENSG00000205413 | SAMD9       | 1.43 | 1.43  | 0.51  | 2.17E-05 | 3.07E+02  | 3.07E+02 |
| ENSG00000125746 | EML2        | 0.68 | -1.47 | -0.56 | 2.30E-05 | -3.07E+02 | 3.07E+02 |
| ENSG00000105329 | TGFB1       | 1.42 | 1.42  | 0.51  | 2.16E-05 | 3.06E+02  | 3.06E+02 |
| ENSG00000166225 | FRS2        | 1.40 | 1.40  | 0.48  | 2.08E-05 | 3.06E+02  | 3.06E+02 |
| ENSG00000159784 | FAM131B     | 1.81 | 1.81  | 0.86  | 3.52E-05 | 3.05E+02  | 3.05E+02 |
| ENSG00000164949 | GEM         | 1.74 | 1.74  | 0.80  | 3.24E-05 | 3.05E+02  | 3.05E+02 |
| ENSG00000176022 | B3GALT6     | 1.38 | 1.38  | 0.47  | 2.07E-05 | 3.04E+02  | 3.04E+02 |
| ENSG00000143624 | INTS3       | 1.44 | 1.44  | 0.53  | 2.25E-05 | 3.04E+02  | 3.04E+02 |
| ENSG00000186205 | MARC1       | 0.54 | -1.87 | -0.90 | 3.77E-05 | -3.04E+02 | 3.04E+02 |
| ENSG00000150403 | TMCO3       | 1.39 | 1.39  | 0.48  | 2.10E-05 | 3.04E+02  | 3.04E+02 |
| ENSG00000115904 | SOS1        | 1.38 | 1.38  | 0.46  | 2.05E-05 | 3.04E+02  | 3.04E+02 |
| ENSG00000173706 | HEG1        | 1.50 | 1.50  | 0.58  | 2.44E-05 | 3.03E+02  | 3.03E+02 |
| ENSG00000187626 | ZKSCAN4     | 0.66 | -1.51 | -0.60 | 2.50E-05 | -3.03E+02 | 3.03E+02 |
| ENSG0000023287  | RB1CC1      | 1.71 | 1.71  | 0.77  | 3.22E-05 | 3.02E+02  | 3.02E+02 |
| ENSG00000131370 | SH3BP5      | 1.40 | 1.40  | 0.49  | 2.16E-05 | 3.01E+02  | 3.01E+02 |
| ENSG00000090432 | MUL1        | 1.38 | 1.38  | 0.46  | 2.09E-05 | 3.01E+02  | 3.01E+02 |
| ENSG00000163918 | RFC4        | 0.72 | -1.38 | -0.47 | 2.11E-05 | -3.01E+02 | 3.01E+02 |
| ENSG00000171155 | C1GALT1C1   | 0.72 | -1.38 | -0.47 | 2.13E-05 | -3.00E+02 | 3.00E+02 |
| ENSG00000177076 | ACER2       | 0.67 | -1.50 | -0.59 | 2.52E-05 | -2.99E+02 | 2.99E+02 |
| ENSG00000171056 | SOX7        | 1.41 | 1.41  | 0.50  | 2.24E-05 | 2.98E+02  | 2.98E+02 |
| ENSG00000204131 | NHSL2       | 1.41 | 1.41  | 0.50  | 2.25E-05 | 2.98E+02  | 2.98E+02 |
| ENSG00000068878 | PSME4       | 1.42 | 1.42  | 0.50  | 2.27E-05 | 2.98E+02  | 2.98E+02 |
| ENSG00000196422 | PPP1R26     | 1.39 | 1.39  | 0.47  | 2.19E-05 | 2.96E+02  | 2.96E+02 |
| ENSG00000182504 | CEP97       | 1.48 | 1.48  | 0.57  | 2.51E-05 | 2.96E+02  | 2.96E+02 |
| ENSG00000243156 | MICAL3      | 1.45 | 1.45  | 0.54  | 2.41E-05 | 2.96E+02  | 2.96E+02 |
| ENSG00000228439 | TSTD3       | 0.58 | -1.71 | -0.78 | 3.36E-05 | -2.96E+02 | 2.96E+02 |
| ENSG00000136888 | ATP6V1G1    | 1.39 | 1.39  | 0.48  | 2.22E-05 | 2.95E+02  | 2.95E+02 |
| ENSG00000138375 | SMARCAL1    | 1.38 | 1.38  | 0.46  | 2.21E-05 | 2.94E+02  | 2.94E+02 |
| ENSG00000164736 | SOX17       | 1.39 | 1.39  | 0.48  | 2.25E-05 | 2.93E+02  | 2.93E+02 |
| ENSG00000185219 | ZNF445      | 0.69 | -1.44 | -0.53 | 2.43E-05 | -2.93E+02 | 2.93E+02 |
| ENSG00000120696 | KBTBD7      | 1.43 | 1.43  | 0.51  | 2.38E-05 | 2.93E+02  | 2.93E+02 |
| ENSG00000186281 | GPAT2       | 0.60 | -1.65 | -0.73 | 3.19E-05 | -2.93E+02 | 2.93E+02 |
| ENSG00000130193 | THEM6       | 0.72 | -1.39 | -0.48 | 2.28E-05 | -2.92E+02 | 2.92E+02 |
| ENSG00000075292 | ZNF638      | 1.56 | 1.56  | 0.64  | 2.86E-05 | 2.92E+02  | 2.92E+02 |
| ENSG00000145335 | SNCA        | 0.70 | -1.42 | -0.51 | 2.38E-05 | -2.91E+02 | 2.91E+02 |
| ENSG00000101255 | TRIB3       | 1.38 | 1.38  | 0.47  | 2.26E-05 | 2.91E+02  | 2.91E+02 |
| ENSG00000034693 | PEX3        | 0.71 | -1.40 | -0.49 | 2.33E-05 | -2.90E+02 | 2.90E+02 |
| ENSG00000171735 | CAMTA1      | 0.70 | -1.42 | -0.51 | 2.43E-05 | -2.89E+02 | 2.89E+02 |
| ENSG00000169908 | TM4SF1      | 1.40 | 1.40  | 0.48  | 2.36E-05 | 2.88E+02  | 2.88E+02 |
| ENSG00000085117 | CD82        | 1.65 | 1.65  | 0.72  | 3.28E-05 | 2.88E+02  | 2.88E+02 |
| ENSG00000152104 | PTPN14      | 1.39 | 1.39  | 0.48  | 2.34E-05 | 2.88E+02  | 2.88E+02 |
| ENSG00000228742 | RP5-884M6.1 | 1.68 | 1.68  | 0.75  | 3.43E-05 | 2.87E+02  | 2.87E+02 |
| ENSG00000154217 | PITPNC1     | 1.44 | 1.44  | 0.52  | 2.52E-05 | 2.86E+02  | 2.86E+02 |
| ENSG00000178104 | PDE4DIP     | 1.38 | 1.38  | 0.46  | 2.35E-05 | 2.85E+02  | 2.85E+02 |
| ENSG00000130332 | LSM7        | 0.68 | -1.46 | -0.55 | 2.64E-05 | -2.84E+02 | 2.84E+02 |
| ENSG00000120802 | TMPO        | 0.71 | -1.41 | -0.49 | 2.46E-05 | -2.84E+02 | 2.84E+02 |
| ENSG00000149292 | TTC12       | 1.50 | 1.50  | 0.58  | 2.82E-05 | 2.82E+02  | 2.82E+02 |
| ENSG00000119979 | FAM45A      | 1.43 | 1.43  | 0.51  | 2.57E-05 | 2.82E+02  | 2.82E+02 |
| ENSG00000130520 | LSM4        | 1.38 | 1.38  | 0.47  | 2.42E-05 | 2.81E+02  | 2.81E+02 |
| ENSG00000102699 | PARP4       | 1.39 | 1.39  | 0.47  | 2.44E-05 | 2.81E+02  | 2.81E+02 |
| ENSG00000132535 | DLG4        | 0.64 | -1.57 | -0.65 | 3.14E-05 | -2.81E+02 | 2.81E+02 |
| ENSG00000254004 | ZNF260      | 1.56 | 1.56  | 0.64  | 3.08E-05 | 2.80E+02  | 2.80E+02 |
| ENSG00000230734 | RPL10P3     | 0.69 | -1.44 | -0.53 | 2.65E-05 | -2.80E+02 | 2.80E+02 |
| ENSG00000136960 | ENPP2       | 0.53 | -1.90 | -0.92 | 4.61E-05 | -2.80E+02 | 2.80E+02 |
| ENSG00000005007 | UPF1        | 1.47 | 1.47  | 0.55  | 2.77E-05 | 2.79E+02  | 2.79E+02 |
| ENSG00000130810 | PPAN        | 0.59 | -1.69 | -0.76 | 3.67E-05 | -2.79E+02 | 2.79E+02 |
| ENSG00000069998 | CECR5       | 0.73 | -1.37 | -0.46 | 2.42E-05 | -2.79E+02 | 2.79E+02 |
| ENSG00000266903 | CTB-171A8.1 | 1.53 | 1.53  | 0.62  | 3.03E-05 | 2.78E+02  | 2.78E+02 |
| ENSG00000168615 | ADAM9       | 1.43 | 1.43  | 0.52  | 2.66E-05 | 2.78E+02  | 2.78E+02 |
| ENSG00000168872 | DDX19A      | 0.73 | -1.37 | -0.45 | 2.44E-05 | -2.78E+02 | 2.78E+02 |
| ENSG00000160193 | WDR4        | 0.59 | -1.68 | -0.75 | 3.70E-05 | -2.76E+02 | 2.76E+02 |
| ENSG00000106665 | CLIP2       | 1.37 | 1.37  | 0.46  | 2.46E-05 | 2.76E+02  | 2.76E+02 |
| ENSG00000107854 | TNKS2       | 1.55 | 1.55  | 0.63  | 3.18E-05 | 2.74E+02  | 2.74E+02 |
| ENSG00000136161 | RCBTB2      | 0.71 | -1.40 | -0.48 | 2.64E-05 | -2.72E+02 | 2.72E+02 |
| ENSG00000197776 | KLHDC1      | 1.86 | 1.86  | 0.89  | 4.68E-05 | 2.71E+02  | 2.71E+02 |
| ENSG00000121039 | RDH10       | 1.38 | 1.38  | 0.46  | 2.58E-05 | 2.71E+02  | 2.71E+02 |
| ENSG00000133216 | EPHB2       | 1.56 | 1.56  | 0.65  | 3.36E-05 | 2.70E+02  | 2.70E+02 |
| ENSG00000116406 | EDEM3       | 1.41 | 1.41  | 0.50  | 2.78E-05 | 2.67E+02  | 2.67E+02 |
| ENSG00000168216 | LMBRD1      | 1.38 | 1.38  | 0.46  | 2.66E-05 | 2.67E+02  | 2.67E+02 |
| ENSG00000163884 | KLF15       | 0.61 | -1.63 | -0.70 | 3.73E-05 | -2.67E+02 | 2.67E+02 |
| ENSG00000164687 | FABP5       | 0.62 | -1.62 | -0.70 | 3.72E-05 | -2.66E+02 | 2.66E+02 |
| ENSG00000178449 | COX14       | 0.68 | -1.47 | -0.55 | 3.04E-05 | -2.66E+02 | 2.66E+02 |
| ENSG00000125772 | GPCPD1      | 0.72 | -1.38 | -0.47 | 2.72E-05 | -2.65E+02 | 2.65E+02 |

|                  |               |      |       |       |          |           |          |
|------------------|---------------|------|-------|-------|----------|-----------|----------|
| ENSG00000066583  | ISOC1         | 0.71 | -1.40 | -0.49 | 2.83E-05 | -2.64E+02 | 2.64E+02 |
| ENSG00000250241  | RP11-9G1.3    | 1.79 | 1.79  | 0.84  | 4.59E-05 | 2.64E+02  | 2.64E+02 |
| ENSG00000147889  | CDKN2A        | 1.79 | 1.79  | 0.84  | 4.67E-05 | 2.62E+02  | 2.62E+02 |
| ENSG00000005486  | RHBDD2        | 1.44 | 1.44  | 0.52  | 3.01E-05 | 2.62E+02  | 2.62E+02 |
| ENSG00000175471  | MCTP1         | 0.69 | -1.45 | -0.53 | 3.06E-05 | -2.62E+02 | 2.62E+02 |
| ENSG00000102780  | DGKH          | 1.44 | 1.44  | 0.53  | 3.05E-05 | 2.62E+02  | 2.62E+02 |
| ENSG00000130826  | DKC1          | 0.72 | -1.39 | -0.48 | 2.83E-05 | -2.61E+02 | 2.61E+02 |
| ENSG00000221994  | ZNF630        | 1.61 | 1.61  | 0.69  | 3.85E-05 | 2.60E+02  | 2.60E+02 |
| ENSG00000119242  | CCDC92        | 1.43 | 1.43  | 0.52  | 3.04E-05 | 2.60E+02  | 2.60E+02 |
| ENSG00000095321  | CRAT          | 1.47 | 1.47  | 0.56  | 3.21E-05 | 2.59E+02  | 2.59E+02 |
| ENSG00000108175  | ZMIZ1         | 1.43 | 1.43  | 0.52  | 3.06E-05 | 2.59E+02  | 2.59E+02 |
| ENSG00000125450  | NUP85         | 0.73 | -1.38 | -0.46 | 2.82E-05 | -2.59E+02 | 2.59E+02 |
| ENSG00000136878  | USP20         | 1.41 | 1.41  | 0.49  | 2.97E-05 | 2.59E+02  | 2.59E+02 |
| ENSG00000119699  | TGFB3         | 1.56 | 1.56  | 0.64  | 3.63E-05 | 2.59E+02  | 2.59E+02 |
| ENSG00000198089  | SFI1          | 0.69 | -1.44 | -0.53 | 3.12E-05 | -2.58E+02 | 2.58E+02 |
| ENSG00000198742  | SMURF1        | 1.39 | 1.39  | 0.47  | 2.92E-05 | 2.57E+02  | 2.57E+02 |
| ENSG00000140526  | ABHD2         | 1.44 | 1.44  | 0.52  | 3.13E-05 | 2.57E+02  | 2.57E+02 |
| ENSG00000139629  | GALNT6        | 1.46 | 1.46  | 0.55  | 3.26E-05 | 2.56E+02  | 2.56E+02 |
| ENSG00000116815  | CD58          | 0.69 | -1.44 | -0.53 | 3.17E-05 | -2.56E+02 | 2.56E+02 |
| ENSG00000184489  | PTP4A3        | 1.62 | 1.62  | 0.70  | 4.03E-05 | 2.55E+02  | 2.55E+02 |
| ENSG00000106780  | MEGF9         | 1.38 | 1.38  | 0.47  | 2.94E-05 | 2.55E+02  | 2.55E+02 |
| ENSG00000171159  | C9orf16       | 0.72 | -1.40 | -0.48 | 3.01E-05 | -2.55E+02 | 2.55E+02 |
| ENSG00000112893  | MAN2A1        | 1.43 | 1.43  | 0.51  | 3.15E-05 | 2.55E+02  | 2.55E+02 |
| ENSG00000172432  | GTPBP2        | 0.73 | -1.38 | -0.46 | 2.94E-05 | -2.54E+02 | 2.54E+02 |
| ENSG00000125149  | C16orf70      | 0.72 | -1.39 | -0.47 | 2.99E-05 | -2.54E+02 | 2.54E+02 |
| ENSG00000166333  | ILK           | 1.40 | 1.40  | 0.48  | 3.05E-05 | 2.53E+02  | 2.53E+02 |
| ENSG00000177469  | PTRF          | 1.39 | 1.39  | 0.48  | 3.04E-05 | 2.53E+02  | 2.53E+02 |
| ENSG00000225138  | CTD-2228K2.7  | 1.48 | 1.48  | 0.56  | 3.41E-05 | 2.53E+02  | 2.53E+02 |
| ENSG00000105971  | CAV2          | 1.40 | 1.40  | 0.48  | 3.08E-05 | 2.52E+02  | 2.52E+02 |
| ENSG00000172469  | MANEA         | 0.67 | -1.49 | -0.58 | 3.49E-05 | -2.52E+02 | 2.52E+02 |
| ENSG00000113318  | MSH3          | 1.36 | 1.36  | 0.44  | 2.95E-05 | 2.51E+02  | 2.51E+02 |
| ENSG00000124201  | ZNFX1         | 1.38 | 1.38  | 0.47  | 3.04E-05 | 2.51E+02  | 2.51E+02 |
| ENSG00000196924  | FLNA          | 1.55 | 1.55  | 0.64  | 3.85E-05 | 2.50E+02  | 2.50E+02 |
| ENSG00000105612  | DNASE2        | 1.38 | 1.38  | 0.47  | 3.04E-05 | 2.50E+02  | 2.50E+02 |
| ENSG00000171310  | CHST11        | 1.37 | 1.37  | 0.46  | 3.01E-05 | 2.50E+02  | 2.50E+02 |
| ENSG00000166046  | TCP11L2       | 1.41 | 1.41  | 0.49  | 3.17E-05 | 2.50E+02  | 2.50E+02 |
| ENSG00000171811  | TTC40         | 0.54 | -1.85 | -0.89 | 5.53E-05 | -2.49E+02 | 2.49E+02 |
| ENSG00000198856  | OSTC          | 0.69 | -1.45 | -0.54 | 3.39E-05 | -2.49E+02 | 2.49E+02 |
| ENSG00000104936  | DMPK          | 1.51 | 1.51  | 0.59  | 3.73E-05 | 2.47E+02  | 2.47E+02 |
| ENSG00000141480  | ARRB2         | 0.71 | -1.40 | -0.49 | 3.26E-05 | -2.46E+02 | 2.46E+02 |
| ENSG00000113845  | TIMMDC1       | 1.38 | 1.38  | 0.46  | 3.16E-05 | 2.45E+02  | 2.45E+02 |
| ENSG00000044115  | CTNNA1        | 1.40 | 1.40  | 0.49  | 3.27E-05 | 2.45E+02  | 2.45E+02 |
| ENSG00000107371  | EXOSC3        | 0.73 | -1.37 | -0.45 | 3.14E-05 | -2.44E+02 | 2.44E+02 |
| ENSG00000105738  | SIPA1L3       | 1.48 | 1.48  | 0.57  | 3.67E-05 | 2.44E+02  | 2.44E+02 |
| ENSG00000261770  | CTC-459F4.1   | 1.79 | 1.79  | 0.84  | 5.40E-05 | 2.43E+02  | 2.43E+02 |
| ENSG00000134030  | CTIF          | 1.37 | 1.37  | 0.46  | 3.19E-05 | 2.43E+02  | 2.43E+02 |
| ENSG00000166188  | ZNF319        | 1.45 | 1.45  | 0.54  | 3.60E-05 | 2.42E+02  | 2.42E+02 |
| ENSG00000140545  | MFGE8         | 1.52 | 1.52  | 0.60  | 3.91E-05 | 2.42E+02  | 2.42E+02 |
| ENSG00000204564  | C6orf136      | 0.62 | -1.60 | -0.68 | 4.39E-05 | -2.42E+02 | 2.42E+02 |
| ENSG00000142327  | RNPEPL1       | 1.36 | 1.36  | 0.44  | 3.17E-05 | 2.42E+02  | 2.42E+02 |
| ENSG00000125459  | RP11-325F22.4 | 1.81 | 1.81  | 0.86  | 5.63E-05 | 2.42E+02  | 2.42E+02 |
| ENSG00000125459  | MSTO1         | 0.68 | -1.48 | -0.56 | 3.77E-05 | -2.40E+02 | 2.40E+02 |
| ENSG00000110092  | CCND1         | 1.46 | 1.46  | 0.55  | 3.69E-05 | 2.40E+02  | 2.40E+02 |
| ENSG00000092621  | PHGDH         | 0.70 | -1.43 | -0.51 | 3.53E-05 | -2.40E+02 | 2.40E+02 |
| ENSG00000184110  | EIF3C         | 0.61 | -1.63 | -0.71 | 4.64E-05 | -2.39E+02 | 2.39E+02 |
| ENSG00000146950  | SHROOM2       | 1.54 | 1.54  | 0.63  | 4.16E-05 | 2.39E+02  | 2.39E+02 |
| ENSG00000147416  | ATP6V1B2      | 1.38 | 1.38  | 0.47  | 3.35E-05 | 2.39E+02  | 2.39E+02 |
| ENSG00000100209  | HSCB          | 1.41 | 1.41  | 0.49  | 3.46E-05 | 2.39E+02  | 2.39E+02 |
| ENSG00000164659  | KIAA1324L     | 1.36 | 1.36  | 0.45  | 3.28E-05 | 2.38E+02  | 2.38E+02 |
| ENSG00000104946  | TBC1D17       | 1.44 | 1.44  | 0.52  | 3.66E-05 | 2.38E+02  | 2.38E+02 |
| ENSG00000168273  | SMIM4         | 0.59 | -1.69 | -0.75 | 5.06E-05 | -2.37E+02 | 2.37E+02 |
| ENSG00000144034  | TPRKB         | 0.72 | -1.39 | -0.47 | 3.47E-05 | -2.35E+02 | 2.35E+02 |
| ENSG00000152127  | MGAT5         | 1.39 | 1.39  | 0.47  | 3.52E-05 | 2.34E+02  | 2.34E+02 |
| ENSG00000188554  | NBR1          | 1.39 | 1.39  | 0.47  | 3.51E-05 | 2.34E+02  | 2.34E+02 |
| ENSG00000140534  | TICRR         | 0.69 | -1.45 | -0.53 | 3.85E-05 | -2.33E+02 | 2.33E+02 |
| ENSG00000004975  | DVL2          | 0.71 | -1.40 | -0.49 | 3.61E-05 | -2.33E+02 | 2.33E+02 |
| ENSG00000140451  | PIF1          | 0.68 | -1.46 | -0.55 | 3.94E-05 | -2.33E+02 | 2.33E+02 |
| ENSG00000101871  | MID1          | 1.39 | 1.39  | 0.47  | 3.54E-05 | 2.33E+02  | 2.33E+02 |
| ENSG00000151876  | FBXO4         | 1.43 | 1.43  | 0.51  | 3.78E-05 | 2.32E+02  | 2.32E+02 |
| ENSG00000236901  | MIR600HG      | 0.57 | -1.74 | -0.80 | 5.65E-05 | -2.31E+02 | 2.31E+02 |
| ENSG000000063176 | SPHK2         | 1.49 | 1.49  | 0.58  | 4.15E-05 | 2.31E+02  | 2.31E+02 |
| ENSG00000143147  | GPR161        | 1.36 | 1.36  | 0.44  | 3.47E-05 | 2.31E+02  | 2.31E+02 |
| ENSG00000267473  | AC005789.11   | 1.67 | 1.67  | 0.74  | 5.23E-05 | 2.31E+02  | 2.31E+02 |
| ENSG00000177082  | WDR73         | 0.73 | -1.36 | -0.45 | 3.50E-05 | -2.31E+02 | 2.31E+02 |
| ENSG00000269937  | RP11-20I23.8  | 1.58 | 1.58  | 0.66  | 4.71E-05 | 2.31E+02  | 2.31E+02 |
| ENSG00000152749  | GPR180        | 1.41 | 1.41  | 0.49  | 3.72E-05 | 2.31E+02  | 2.31E+02 |
| ENSG00000155755  | TMEM237       | 0.73 | -1.36 | -0.45 | 3.50E-05 | -2.30E+02 | 2.30E+02 |
| ENSG00000105397  | TYK2          | 0.73 | -1.36 | -0.45 | 3.52E-05 | -2.30E+02 | 2.30E+02 |
| ENSG00000145365  | TIFA          | 0.73 | -1.37 | -0.45 | 3.57E-05 | -2.29E+02 | 2.29E+02 |

|                 |              |      |       |       |          |           |          |
|-----------------|--------------|------|-------|-------|----------|-----------|----------|
| ENSG00000204540 | PSORS1C1     | 1.58 | 1.58  | 0.66  | 4.80E-05 | 2.28E+02  | 2.28E+02 |
| ENSG00000201098 | RNY1         | 1.88 | 1.88  | 0.91  | 6.76E-05 | 2.28E+02  | 2.28E+02 |
|                 | RP11-31E23.1 | 1.72 | 1.72  | 0.78  | 5.74E-05 | 2.27E+02  | 2.27E+02 |
| ENSG00000165512 | ZNF22        | 0.71 | -1.40 | -0.49 | 3.86E-05 | -2.26E+02 | 2.26E+02 |
| ENSG00000198081 | ZFP161       | 1.36 | 1.36  | 0.45  | 3.64E-05 | 2.26E+02  | 2.26E+02 |
| ENSG00000130382 | MLLT1        | 0.70 | -1.43 | -0.52 | 4.01E-05 | -2.26E+02 | 2.26E+02 |
| ENSG00000167785 | ZNF558       | 1.47 | 1.47  | 0.56  | 4.26E-05 | 2.25E+02  | 2.25E+02 |
| ENSG00000198885 | ITPR1PL1     | 0.60 | -1.66 | -0.73 | 5.46E-05 | -2.25E+02 | 2.25E+02 |
| ENSG00000167323 | STIM1        | 1.47 | 1.47  | 0.55  | 4.26E-05 | 2.25E+02  | 2.25E+02 |
| ENSG00000179832 | HEATR7A      | 1.45 | 1.45  | 0.53  | 4.16E-05 | 2.24E+02  | 2.24E+02 |
| ENSG00000173064 | HECTD4       | 1.47 | 1.47  | 0.56  | 4.32E-05 | 2.23E+02  | 2.23E+02 |
| ENSG00000107874 | CUEDC2       | 1.36 | 1.36  | 0.44  | 3.72E-05 | 2.23E+02  | 2.23E+02 |
| ENSG00000142534 | RPS11        | 0.71 | -1.41 | -0.49 | 4.00E-05 | -2.22E+02 | 2.22E+02 |
| ENSG00000160087 | UBE2J2       | 1.36 | 1.36  | 0.44  | 3.77E-05 | 2.21E+02  | 2.21E+02 |
| ENSG00000089248 | ERP29        | 0.71 | -1.42 | -0.50 | 4.14E-05 | -2.21E+02 | 2.21E+02 |
| ENSG00000229043 | AC091729.9   | 1.69 | 1.69  | 0.76  | 5.90E-05 | 2.21E+02  | 2.21E+02 |
| ENSG00000130023 | C6orf70      | 1.37 | 1.37  | 0.46  | 3.94E-05 | 2.19E+02  | 2.19E+02 |
| ENSG00000261526 | CTB-31O20.2  | 0.57 | -1.75 | -0.81 | 6.42E-05 | -2.18E+02 | 2.18E+02 |
| ENSG00000105518 | TMEM205      | 1.38 | 1.38  | 0.46  | 3.99E-05 | 2.18E+02  | 2.18E+02 |
| ENSG00000136021 | SCYL2        | 1.51 | 1.51  | 0.60  | 4.87E-05 | 2.17E+02  | 2.17E+02 |
| ENSG00000115128 | SF3B14       | 0.72 | -1.39 | -0.48 | 4.15E-05 | -2.16E+02 | 2.16E+02 |
| ENSG00000162999 | DUSP19       | 1.52 | 1.52  | 0.60  | 4.93E-05 | 2.16E+02  | 2.16E+02 |
| ENSG00000065615 | CYB5R4       | 1.47 | 1.47  | 0.55  | 4.63E-05 | 2.15E+02  | 2.15E+02 |
| ENSG00000087111 | PIGS         | 0.71 | -1.42 | -0.50 | 4.36E-05 | -2.15E+02 | 2.15E+02 |
| ENSG00000115758 | ODC1         | 0.72 | -1.40 | -0.48 | 4.27E-05 | -2.14E+02 | 2.14E+02 |
| ENSG00000104447 | TRPS1        | 1.46 | 1.46  | 0.54  | 4.65E-05 | 2.14E+02  | 2.14E+02 |
| ENSG00000119689 | DLST         | 0.69 | -1.45 | -0.53 | 4.60E-05 | -2.13E+02 | 2.13E+02 |
| ENSG00000123700 | KCNJ2        | 0.72 | -1.38 | -0.47 | 4.20E-05 | -2.13E+02 | 2.13E+02 |
| ENSG00000132434 | LANCL2       | 0.74 | -1.36 | -0.44 | 4.05E-05 | -2.13E+02 | 2.13E+02 |
| ENSG00000227825 | SLC9A7P1     | 0.61 | -1.64 | -0.72 | 5.97E-05 | -2.13E+02 | 2.13E+02 |
| ENSG00000274151 | AC018737.1   | 0.63 | -1.58 | -0.66 | 5.55E-05 | -2.13E+02 | 2.13E+02 |
| ENSG00000141741 | MIEN1        | 0.73 | -1.36 | -0.45 | 4.12E-05 | -2.12E+02 | 2.12E+02 |
| ENSG00000158528 | PPP1R9A      | 0.64 | -1.56 | -0.64 | 5.38E-05 | -2.12E+02 | 2.12E+02 |
| ENSG00000178028 | DMAP1        | 0.69 | -1.45 | -0.54 | 4.71E-05 | -2.11E+02 | 2.11E+02 |
| ENSG00000172831 | CES2         | 1.37 | 1.37  | 0.45  | 4.24E-05 | 2.10E+02  | 2.10E+02 |
| ENSG00000177311 | ZBTB38       | 1.46 | 1.46  | 0.54  | 4.86E-05 | 2.09E+02  | 2.09E+02 |
| ENSG00000143751 | SDE2         | 1.38 | 1.38  | 0.46  | 4.34E-05 | 2.09E+02  | 2.09E+02 |
| ENSG00000149483 | TMEM138      | 0.71 | -1.41 | -0.50 | 4.56E-05 | -2.09E+02 | 2.09E+02 |
| ENSG00000138119 | MYOF         | 1.38 | 1.38  | 0.47  | 4.39E-05 | 2.09E+02  | 2.09E+02 |
| ENSG00000169744 | LDB2         | 0.73 | -1.38 | -0.46 | 4.35E-05 | -2.09E+02 | 2.09E+02 |
| ENSG00000108094 | CUL2         | 1.42 | 1.42  | 0.50  | 4.61E-05 | 2.09E+02  | 2.09E+02 |
| ENSG00000198453 | ZNF568       | 1.41 | 1.41  | 0.50  | 4.59E-05 | 2.09E+02  | 2.09E+02 |
| ENSG00000168434 | COG7         | 0.72 | -1.39 | -0.47 | 4.42E-05 | -2.08E+02 | 2.08E+02 |
| ENSG00000138642 | HERC6        | 0.67 | -1.50 | -0.59 | 5.23E-05 | -2.08E+02 | 2.08E+02 |
| ENSG00000167513 | CDT1         | 0.70 | -1.42 | -0.50 | 4.68E-05 | -2.07E+02 | 2.07E+02 |
| ENSG00000116157 | GPX7         | 0.71 | -1.40 | -0.49 | 4.56E-05 | -2.07E+02 | 2.07E+02 |
| ENSG00000174282 | ZBTB4        | 1.36 | 1.36  | 0.45  | 4.32E-05 | 2.07E+02  | 2.07E+02 |
| ENSG00000100815 | TRIP11       | 1.60 | 1.60  | 0.68  | 6.01E-05 | 2.07E+02  | 2.07E+02 |
| ENSG00000174796 | THAP6        | 1.45 | 1.45  | 0.53  | 4.91E-05 | 2.07E+02  | 2.07E+02 |
| ENSG00000167291 | TBC1D16      | 0.73 | -1.37 | -0.46 | 4.41E-05 | -2.06E+02 | 2.06E+02 |
| ENSG00000161016 | RPL8         | 0.71 | -1.42 | -0.50 | 4.75E-05 | -2.06E+02 | 2.06E+02 |
| ENSG00000185551 | NR2F2        | 0.71 | -1.41 | -0.49 | 4.70E-05 | -2.05E+02 | 2.05E+02 |
| ENSG00000164543 | STK17A       | 0.72 | -1.38 | -0.47 | 4.53E-05 | -2.05E+02 | 2.05E+02 |
| ENSG00000116711 | PLA2G4A      | 1.41 | 1.41  | 0.50  | 4.76E-05 | 2.05E+02  | 2.05E+02 |
| ENSG00000232388 | LINC00493    | 0.72 | -1.39 | -0.47 | 4.60E-05 | -2.04E+02 | 2.04E+02 |
| ENSG00000144283 | PKP4         | 0.72 | -1.39 | -0.47 | 4.62E-05 | -2.04E+02 | 2.04E+02 |
| ENSG00000247626 | MARS2        | 0.69 | -1.45 | -0.54 | 5.09E-05 | -2.04E+02 | 2.04E+02 |
| ENSG00000151967 | SCHIP1       | 1.46 | 1.46  | 0.55  | 5.18E-05 | 2.04E+02  | 2.04E+02 |
| ENSG00000183077 | AFMID        | 0.71 | -1.40 | -0.49 | 4.77E-05 | -2.03E+02 | 2.03E+02 |
| ENSG00000154263 | ABCA10       | 1.69 | 1.69  | 0.76  | 6.99E-05 | 2.02E+02  | 2.02E+02 |
| ENSG00000204271 | SPIN3        | 0.55 | -1.83 | -0.88 | 8.27E-05 | -2.02E+02 | 2.02E+02 |
| ENSG00000160221 | C21orf33     | 1.35 | 1.35  | 0.43  | 4.49E-05 | 2.01E+02  | 2.01E+02 |
| ENSG00000198093 | ZNF649       | 0.70 | -1.43 | -0.51 | 5.03E-05 | -2.01E+02 | 2.01E+02 |
| ENSG00000144426 | NBEAL1       | 1.73 | 1.73  | 0.79  | 7.45E-05 | 2.01E+02  | 2.01E+02 |
| ENSG00000115282 | TTC31        | 0.70 | -1.44 | -0.52 | 5.14E-05 | -2.01E+02 | 2.01E+02 |
| ENSG00000075213 | SEMA3A       | 0.56 | -1.80 | -0.85 | 8.05E-05 | -2.00E+02 | 2.00E+02 |
| ENSG00000214706 | IFRD2        | 0.71 | -1.42 | -0.50 | 5.07E-05 | -1.99E+02 | 1.99E+02 |
| ENSG00000186193 | SAPCD2       | 0.70 | -1.43 | -0.51 | 5.16E-05 | -1.99E+02 | 1.99E+02 |
| ENSG00000143947 | RPS27A       | 0.68 | -1.46 | -0.55 | 5.42E-05 | -1.98E+02 | 1.98E+02 |
| ENSG00000116871 | MAP7D1       | 1.42 | 1.42  | 0.51  | 5.16E-05 | 1.98E+02  | 1.98E+02 |
| ENSG00000114353 | GNAI2        | 1.38 | 1.38  | 0.47  | 4.88E-05 | 1.98E+02  | 1.98E+02 |
| ENSG00000167005 | NUDT21       | 0.72 | -1.38 | -0.47 | 4.94E-05 | -1.97E+02 | 1.97E+02 |
| ENSG00000154743 | TSEN2        | 0.69 | -1.44 | -0.53 | 5.39E-05 | -1.96E+02 | 1.96E+02 |
| ENSG00000076944 | STXBP2       | 1.43 | 1.43  | 0.52  | 5.36E-05 | 1.96E+02  | 1.96E+02 |
| ENSG00000148335 | NTMT1        | 0.73 | -1.38 | -0.46 | 4.97E-05 | -1.95E+02 | 1.95E+02 |
| ENSG00000124145 | SDC4         | 1.38 | 1.38  | 0.46  | 5.00E-05 | 1.94E+02  | 1.94E+02 |
| ENSG00000180011 | ZADH2        | 1.36 | 1.36  | 0.45  | 4.92E-05 | 1.94E+02  | 1.94E+02 |
| ENSG00000077348 | EXOSC5       | 0.68 | -1.46 | -0.55 | 5.72E-05 | -1.94E+02 | 1.94E+02 |
| ENSG00000105948 | TTC26        | 0.73 | -1.37 | -0.46 | 5.06E-05 | -1.93E+02 | 1.93E+02 |

|                  |               |      |       |       |          |           |          |
|------------------|---------------|------|-------|-------|----------|-----------|----------|
| ENSG00000139826  | ABHD13        | 1.38 | 1.38  | 0.46  | 5.11E-05 | 1.93E+02  | 1.93E+02 |
| ENSG00000152056  | AP1S3         | 0.63 | -1.60 | -0.68 | 6.89E-05 | -1.93E+02 | 1.93E+02 |
| ENSG00000104953  | TLE6          | 1.92 | 1.92  | 0.94  | 1.01E-04 | 1.91E+02  | 1.91E+02 |
| ENSG00000143164  | DCAF6         | 1.37 | 1.37  | 0.45  | 5.12E-05 | 1.91E+02  | 1.91E+02 |
| ENSG00000168575  | SLC20A2       | 1.43 | 1.43  | 0.52  | 5.63E-05 | 1.91E+02  | 1.91E+02 |
| ENSG00000127955  | GNAI1         | 0.74 | -1.35 | -0.43 | 5.01E-05 | -1.91E+02 | 1.91E+02 |
| ENSG00000104915  | STX10         | 0.74 | -1.36 | -0.44 | 5.07E-05 | -1.90E+02 | 1.90E+02 |
| ENSG00000122778  | KIAA1549      | 1.46 | 1.46  | 0.55  | 5.96E-05 | 1.90E+02  | 1.90E+02 |
| ENSG00000182768  | NGRN          | 1.36 | 1.36  | 0.44  | 5.19E-05 | 1.89E+02  | 1.89E+02 |
| ENSG00000269900  | RMRP          | 0.67 | -1.49 | -0.57 | 6.21E-05 | -1.89E+02 | 1.89E+02 |
| ENSG00000166685  | COG1          | 0.74 | -1.36 | -0.44 | 5.23E-05 | -1.87E+02 | 1.87E+02 |
| ENSG00000155393  | HEATR3        | 0.74 | -1.35 | -0.43 | 5.17E-05 | -1.87E+02 | 1.87E+02 |
| ENSG00000203875  | SNHG5         | 0.70 | -1.43 | -0.52 | 5.89E-05 | -1.86E+02 | 1.86E+02 |
| ENSG00000134285  | FKBP11        | 0.71 | -1.41 | -0.50 | 5.75E-05 | -1.86E+02 | 1.86E+02 |
|                  | RP11-323F24.1 | 1.65 | 1.65  | 0.72  | 7.99E-05 | 1.84E+02  | 1.84E+02 |
| ENSG00000176018  | LYSMD3        | 1.43 | 1.43  | 0.52  | 6.02E-05 | 1.84E+02  | 1.84E+02 |
| ENSG00000159082  | SYNJ1         | 1.49 | 1.49  | 0.57  | 6.52E-05 | 1.84E+02  | 1.84E+02 |
| ENSG00000164081  | TEX264        | 1.35 | 1.35  | 0.44  | 5.40E-05 | 1.84E+02  | 1.84E+02 |
| ENSG00000129474  | AJUBA         | 1.34 | 1.34  | 0.42  | 5.31E-05 | 1.84E+02  | 1.84E+02 |
| ENSG00000255389  | TRAF3IP2-AS1  | 0.61 | -1.64 | -0.72 | 8.03E-05 | -1.83E+02 | 1.83E+02 |
| ENSG00000167306  | MYO5B         | 1.79 | 1.79  | 0.84  | 9.50E-05 | 1.83E+02  | 1.83E+02 |
| ENSG00000186185  | KIF18B        | 0.73 | -1.38 | -0.46 | 5.70E-05 | -1.82E+02 | 1.82E+02 |
| ENSG00000082701  | GSK3B         | 1.39 | 1.39  | 0.47  | 5.79E-05 | 1.82E+02  | 1.82E+02 |
| ENSG00000136247  | ZDHHC4        | 0.74 | -1.36 | -0.44 | 5.58E-05 | -1.82E+02 | 1.82E+02 |
| ENSG00000197702  | PARVA         | 0.72 | -1.38 | -0.47 | 5.78E-05 | -1.82E+02 | 1.82E+02 |
| ENSG00000005022  | SLC25A5       | 0.73 | -1.38 | -0.46 | 5.78E-05 | -1.81E+02 | 1.81E+02 |
| ENSG00000138035  | PNPT1         | 0.73 | -1.37 | -0.45 | 5.67E-05 | -1.81E+02 | 1.81E+02 |
|                  | CTD-2314B22.3 | 1.47 | 1.47  | 0.55  | 6.56E-05 | 1.81E+02  | 1.81E+02 |
| ENSG00000196954  | CASP4         | 0.73 | -1.37 | -0.46 | 5.76E-05 | -1.81E+02 | 1.81E+02 |
| ENSG00000127419  | TMEM175       | 0.58 | -1.71 | -0.78 | 9.00E-05 | -1.80E+02 | 1.80E+02 |
| ENSG00000074590  | NUAK1         | 1.39 | 1.39  | 0.47  | 5.91E-05 | 1.80E+02  | 1.80E+02 |
| ENSG000000005100 | DHX33         | 0.72 | -1.40 | -0.48 | 6.02E-05 | -1.80E+02 | 1.80E+02 |
| ENSG00000188290  | HES4          | 1.72 | 1.72  | 0.78  | 9.15E-05 | 1.79E+02  | 1.79E+02 |
| ENSG00000164253  | WDR41         | 1.36 | 1.36  | 0.45  | 5.76E-05 | 1.79E+02  | 1.79E+02 |
| ENSG00000135245  | HILPDA        | 0.70 | -1.42 | -0.51 | 6.35E-05 | -1.79E+02 | 1.79E+02 |
| ENSG00000114019  | AMOTL2        | 1.41 | 1.41  | 0.49  | 6.26E-05 | 1.78E+02  | 1.78E+02 |
| ENSG00000137449  | CPEB2         | 1.40 | 1.40  | 0.49  | 6.21E-05 | 1.78E+02  | 1.78E+02 |
| ENSG00000125266  | EFNB2         | 0.74 | -1.36 | -0.44 | 5.81E-05 | -1.78E+02 | 1.78E+02 |
| ENSG00000185201  | IFITM2        | 0.73 | -1.37 | -0.46 | 6.03E-05 | -1.77E+02 | 1.77E+02 |
| ENSG00000104450  | SPAG1         | 0.70 | -1.43 | -0.52 | 6.66E-05 | -1.75E+02 | 1.75E+02 |
| ENSG00000111726  | CMAS          | 0.73 | -1.37 | -0.46 | 6.17E-05 | -1.75E+02 | 1.75E+02 |
| ENSG00000271601  | LIX1L         | 0.74 | -1.36 | -0.44 | 6.01E-05 | -1.75E+02 | 1.75E+02 |
| ENSG00000174996  | KLC2          | 1.37 | 1.37  | 0.45  | 6.12E-05 | 1.75E+02  | 1.75E+02 |
| ENSG00000100461  | RBM23         | 0.74 | -1.35 | -0.44 | 6.03E-05 | -1.74E+02 | 1.74E+02 |
| ENSG00000183474  | GTF2H2C       | 0.69 | -1.45 | -0.54 | 7.01E-05 | -1.73E+02 | 1.73E+02 |
| ENSG00000167565  | SERTAD3       | 1.35 | 1.35  | 0.43  | 6.09E-05 | 1.73E+02  | 1.73E+02 |
| ENSG00000163605  | PPP4R2        | 1.40 | 1.40  | 0.49  | 6.62E-05 | 1.72E+02  | 1.72E+02 |
| ENSG00000158769  | F11R          | 1.37 | 1.37  | 0.45  | 6.34E-05 | 1.72E+02  | 1.72E+02 |
| ENSG00000114115  | RBP1          | 0.60 | -1.67 | -0.74 | 9.48E-05 | -1.72E+02 | 1.72E+02 |
| ENSG00000189362  | TMEM194B      | 0.68 | -1.46 | -0.55 | 7.26E-05 | -1.71E+02 | 1.71E+02 |
| ENSG00000163428  | LRRC58        | 1.36 | 1.36  | 0.44  | 6.27E-05 | 1.71E+02  | 1.71E+02 |
| ENSG00000187778  | MCRS1         | 0.74 | -1.36 | -0.44 | 6.38E-05 | -1.70E+02 | 1.70E+02 |
| ENSG00000188811  | NHLRC3        | 1.36 | 1.36  | 0.44  | 6.38E-05 | 1.70E+02  | 1.70E+02 |
| ENSG00000157827  | FMNL2         | 1.36 | 1.36  | 0.44  | 6.38E-05 | 1.70E+02  | 1.70E+02 |
| ENSG00000173889  | PHC3          | 1.39 | 1.39  | 0.48  | 6.71E-05 | 1.70E+02  | 1.70E+02 |
| ENSG00000137878  | GCOM1         | 1.65 | 1.65  | 0.72  | 9.38E-05 | 1.70E+02  | 1.70E+02 |
| ENSG00000198692  | EIF1AY        | 0.56 | -1.79 | -0.84 | 1.12E-04 | -1.69E+02 | 1.69E+02 |
| ENSG00000177981  | ASB8          | 0.74 | -1.34 | -0.43 | 6.30E-05 | -1.69E+02 | 1.69E+02 |
| ENSG00000222041  | LINC00152     | 1.34 | 1.34  | 0.43  | 6.38E-05 | 1.68E+02  | 1.68E+02 |
| ENSG00000149639  | SOGA1         | 1.38 | 1.38  | 0.47  | 6.75E-05 | 1.68E+02  | 1.68E+02 |
| ENSG00000171033  | PKIA          | 1.36 | 1.36  | 0.45  | 6.60E-05 | 1.68E+02  | 1.68E+02 |
| ENSG00000082996  | RNF13         | 1.36 | 1.36  | 0.44  | 6.57E-05 | 1.68E+02  | 1.68E+02 |
| ENSG00000256061  | DYX1C1        | 1.73 | 1.73  | 0.79  | 1.07E-04 | 1.67E+02  | 1.67E+02 |
| ENSG00000188610  | FAM72B        | 1.66 | 1.66  | 0.73  | 9.84E-05 | 1.67E+02  | 1.67E+02 |
| ENSG00000130340  | SNX9          | 1.36 | 1.36  | 0.45  | 6.66E-05 | 1.67E+02  | 1.67E+02 |
| ENSG000000006327 | TNFRSF12A     | 0.73 | -1.37 | -0.46 | 6.77E-05 | -1.67E+02 | 1.67E+02 |
| ENSG00000133858  | ZFC3H1        | 1.47 | 1.47  | 0.55  | 7.74E-05 | 1.67E+02  | 1.67E+02 |
| ENSG00000113441  | LNPEP         | 1.37 | 1.37  | 0.45  | 6.73E-05 | 1.67E+02  | 1.67E+02 |
| ENSG000000091140 | DLD           | 0.73 | -1.37 | -0.45 | 6.80E-05 | -1.66E+02 | 1.66E+02 |
| ENSG00000128965  | CHAC1         | 1.76 | 1.76  | 0.82  | 1.13E-04 | 1.66E+02  | 1.66E+02 |
| ENSG00000113593  | PPWD1         | 0.72 | -1.38 | -0.47 | 7.02E-05 | -1.65E+02 | 1.65E+02 |
| ENSG00000070669  | ASNS          | 0.71 | -1.40 | -0.49 | 7.24E-05 | -1.65E+02 | 1.65E+02 |
| ENSG00000152455  | SUV39H2       | 0.74 | -1.36 | -0.44 | 6.79E-05 | -1.65E+02 | 1.65E+02 |
| ENSG00000146278  | PNRC1         | 1.38 | 1.38  | 0.47  | 7.06E-05 | 1.64E+02  | 1.64E+02 |
| ENSG00000112378  | PERP          | 1.37 | 1.37  | 0.45  | 6.94E-05 | 1.64E+02  | 1.64E+02 |
| ENSG00000188677  | PARVB         | 1.38 | 1.38  | 0.46  | 7.03E-05 | 1.64E+02  | 1.64E+02 |
| ENSG00000229809  | ZNF688        | 1.50 | 1.50  | 0.59  | 8.37E-05 | 1.64E+02  | 1.64E+02 |
| ENSG00000163513  | TGFBR2        | 1.38 | 1.38  | 0.46  | 7.02E-05 | 1.64E+02  | 1.64E+02 |
| ENSG00000170917  | NUDT6         | 1.41 | 1.41  | 0.49  | 7.37E-05 | 1.64E+02  | 1.64E+02 |

|                  |               |      |       |       |          |           |          |
|------------------|---------------|------|-------|-------|----------|-----------|----------|
| ENSG00000152332  | UHMK1         | 1.39 | 1.39  | 0.47  | 7.22E-05 | 1.63E+02  | 1.63E+02 |
| ENSG00000123384  | LRP1          | 1.58 | 1.58  | 0.66  | 9.43E-05 | 1.63E+02  | 1.63E+02 |
| ENSG00000118640  | VAMP8         | 0.72 | -1.39 | -0.48 | 7.36E-05 | -1.63E+02 | 1.63E+02 |
| ENSG00000108883  | EFTUD2        | 0.73 | -1.37 | -0.46 | 7.14E-05 | -1.62E+02 | 1.62E+02 |
| ENSG00000116649  | SRM           | 0.74 | -1.34 | -0.43 | 7.00E-05 | -1.61E+02 | 1.61E+02 |
| ENSG00000105538  | RASIP1        | 1.42 | 1.42  | 0.51  | 7.86E-05 | 1.60E+02  | 1.60E+02 |
| ENSG00000204394  | VAR5          | 1.40 | 1.40  | 0.49  | 7.71E-05 | 1.60E+02  | 1.60E+02 |
| ENSG00000178605  | GTPBP6        | 0.73 | -1.37 | -0.45 | 7.36E-05 | -1.59E+02 | 1.59E+02 |
| ENSG00000131435  | PD LIM4       | 1.36 | 1.36  | 0.44  | 7.29E-05 | 1.59E+02  | 1.59E+02 |
| ENSG00000164654  | MIOS          | 0.75 | -1.34 | -0.42 | 7.20E-05 | -1.58E+02 | 1.58E+02 |
| ENSG00000109787  | KLF3          | 1.37 | 1.37  | 0.45  | 7.47E-05 | 1.58E+02  | 1.58E+02 |
| ENSG00000132950  | ZMYM5         | 1.35 | 1.35  | 0.43  | 7.33E-05 | 1.58E+02  | 1.58E+02 |
| ENSG00000006530  | AGK           | 0.75 | -1.34 | -0.42 | 7.32E-05 | -1.56E+02 | 1.56E+02 |
| ENSG00000181894  | ZNF329        | 1.36 | 1.36  | 0.44  | 7.56E-05 | 1.56E+02  | 1.56E+02 |
| ENSG00000178971  | CTC1          | 0.65 | -1.53 | -0.61 | 9.64E-05 | -1.56E+02 | 1.56E+02 |
| ENSG00000077514  | POLD3         | 0.75 | -1.34 | -0.42 | 7.52E-05 | -1.55E+02 | 1.55E+02 |
| ENSG00000089820  | ARHGAP4       | 1.35 | 1.35  | 0.43  | 7.61E-05 | 1.54E+02  | 1.54E+02 |
| ENSG00000141101  | NOB1          | 0.68 | -1.47 | -0.56 | 9.10E-05 | -1.54E+02 | 1.54E+02 |
| ENSG00000005189  | AC004381.6    | 0.68 | -1.48 | -0.56 | 9.16E-05 | -1.54E+02 | 1.54E+02 |
| ENSG00000185896  | LAMP1         | 1.39 | 1.39  | 0.48  | 8.17E-05 | 1.54E+02  | 1.54E+02 |
| ENSG00000145979  | TBC1D7        | 1.36 | 1.36  | 0.44  | 7.84E-05 | 1.53E+02  | 1.53E+02 |
| ENSG00000244627  | RP3-449O17.1  | 1.74 | 1.74  | 0.80  | 1.30E-04 | 1.53E+02  | 1.53E+02 |
| ENSG00000167074  | TEF           | 1.52 | 1.52  | 0.61  | 9.93E-05 | 1.53E+02  | 1.53E+02 |
| ENSG00000165501  | LRR1          | 0.74 | -1.35 | -0.43 | 7.80E-05 | -1.53E+02 | 1.53E+02 |
| ENSG00000111371  | SLC38A1       | 1.36 | 1.36  | 0.45  | 7.95E-05 | 1.53E+02  | 1.53E+02 |
| ENSG00000087448  | KLHDC5        | 1.36 | 1.36  | 0.44  | 7.97E-05 | 1.52E+02  | 1.52E+02 |
| ENSG000000001167 | NFYA          | 1.53 | 1.53  | 0.61  | 1.01E-04 | 1.52E+02  | 1.52E+02 |
| ENSG00000005339  | CREBBP        | 1.40 | 1.40  | 0.49  | 8.47E-05 | 1.52E+02  | 1.52E+02 |
| ENSG00000168234  | TTC39C        | 0.67 | -1.49 | -0.58 | 9.64E-05 | -1.52E+02 | 1.52E+02 |
| ENSG00000129071  | MBD4          | 0.75 | -1.34 | -0.42 | 7.78E-05 | -1.52E+02 | 1.52E+02 |
| ENSG00000126226  | PCID2         | 0.74 | -1.34 | -0.43 | 7.92E-05 | -1.51E+02 | 1.51E+02 |
| ENSG00000158427  | TMSB15B       | 1.37 | 1.37  | 0.45  | 8.21E-05 | 1.51E+02  | 1.51E+02 |
| ENSG00000149177  | PTPRJ         | 1.35 | 1.35  | 0.43  | 8.04E-05 | 1.50E+02  | 1.50E+02 |
| ENSG00000175643  | RMI2          | 0.68 | -1.46 | -0.55 | 9.53E-05 | -1.50E+02 | 1.50E+02 |
| ENSG00000089159  | PXN           | 1.47 | 1.47  | 0.56  | 9.66E-05 | 1.50E+02  | 1.50E+02 |
| ENSG000000253059 | SNORA31       | 0.53 | -1.87 | -0.90 | 1.56E-04 | -1.50E+02 | 1.50E+02 |
| ENSG00000132823  | C20orf111     | 1.34 | 1.34  | 0.42  | 8.01E-05 | 1.49E+02  | 1.49E+02 |
| ENSG00000109220  | CHIC2         | 1.33 | 1.33  | 0.42  | 8.09E-05 | 1.48E+02  | 1.48E+02 |
| ENSG00000154957  | ZNF18         | 1.42 | 1.42  | 0.51  | 9.21E-05 | 1.48E+02  | 1.48E+02 |
| ENSG00000100142  | POLR2F        | 0.73 | -1.36 | -0.45 | 8.49E-05 | -1.48E+02 | 1.48E+02 |
| ENSG00000182628  | SKA2          | 0.73 | -1.36 | -0.45 | 8.55E-05 | -1.47E+02 | 1.47E+02 |
| ENSG00000181754  | AMIGO1        | 0.58 | -1.73 | -0.79 | 1.37E-04 | -1.47E+02 | 1.47E+02 |
| ENSG00000100478  | AP4S1         | 0.68 | -1.48 | -0.57 | 1.01E-04 | -1.47E+02 | 1.47E+02 |
| ENSG00000106772  | PRUNE2        | 0.72 | -1.39 | -0.48 | 8.97E-05 | -1.47E+02 | 1.47E+02 |
| ENSG00000123473  | STIL          | 0.75 | -1.34 | -0.42 | 8.34E-05 | -1.47E+02 | 1.47E+02 |
| ENSG00000130413  | STK33         | 0.54 | -1.84 | -0.88 | 1.60E-04 | -1.46E+02 | 1.46E+02 |
| ENSG00000172465  | TCEAL1        | 0.73 | -1.38 | -0.46 | 8.92E-05 | -1.46E+02 | 1.46E+02 |
| ENSG00000267532  | MIR497HG      | 1.53 | 1.53  | 0.61  | 1.09E-04 | 1.46E+02  | 1.46E+02 |
| ENSG00000235194  | PPP1R3E       | 0.64 | -1.57 | -0.65 | 1.15E-04 | -1.46E+02 | 1.46E+02 |
| ENSG00000177842  | ZNF620        | 0.68 | -1.48 | -0.56 | 1.03E-04 | -1.46E+02 | 1.46E+02 |
| ENSG00000121236  | TRIM6         | 0.62 | -1.60 | -0.68 | 1.22E-04 | -1.45E+02 | 1.45E+02 |
| ENSG00000090889  | KIF4A         | 0.73 | -1.37 | -0.46 | 8.95E-05 | -1.45E+02 | 1.45E+02 |
| ENSG00000196263  | ZNF471        | 1.67 | 1.67  | 0.74  | 1.34E-04 | 1.44E+02  | 1.44E+02 |
| ENSG00000106991  | ENG           | 1.43 | 1.43  | 0.52  | 9.86E-05 | 1.44E+02  | 1.44E+02 |
| ENSG00000147535  | PPAPDC1B      | 0.74 | -1.34 | -0.43 | 8.69E-05 | -1.44E+02 | 1.44E+02 |
| ENSG00000101911  | PRPS2         | 0.75 | -1.33 | -0.42 | 8.57E-05 | -1.44E+02 | 1.44E+02 |
| ENSG00000248487  | ABHD14A       | 0.62 | -1.61 | -0.69 | 1.25E-04 | -1.44E+02 | 1.44E+02 |
| ENSG00000177946  | CENPBD1       | 1.49 | 1.49  | 0.58  | 1.08E-04 | 1.44E+02  | 1.44E+02 |
| ENSG00000157741  | UBN2          | 1.37 | 1.37  | 0.45  | 9.02E-05 | 1.44E+02  | 1.44E+02 |
| ENSG00000107816  | LZTS2         | 1.34 | 1.34  | 0.42  | 8.72E-05 | 1.44E+02  | 1.44E+02 |
| ENSG00000104679  | R3HCC1        | 0.74 | -1.34 | -0.42 | 8.76E-05 | -1.43E+02 | 1.43E+02 |
| ENSG00000176715  | ACSF3         | 0.75 | -1.34 | -0.42 | 8.84E-05 | -1.43E+02 | 1.43E+02 |
| ENSG00000105639  | JAK3          | 0.54 | -1.85 | -0.88 | 1.67E-04 | -1.43E+02 | 1.43E+02 |
| ENSG00000096080  | MRPS18A       | 0.74 | -1.35 | -0.43 | 8.96E-05 | -1.42E+02 | 1.42E+02 |
| ENSG00000167508  | MVD           | 0.75 | -1.34 | -0.42 | 8.96E-05 | -1.42E+02 | 1.42E+02 |
| ENSG00000233429  | HOTAIRM1      | 0.72 | -1.38 | -0.47 | 9.55E-05 | -1.41E+02 | 1.41E+02 |
|                  | RP11-446H18.3 | 0.70 | -1.43 | -0.52 | 1.03E-04 | -1.41E+02 | 1.41E+02 |
| ENSG00000213859  | KCTD11        | 1.50 | 1.50  | 0.58  | 1.12E-04 | 1.41E+02  | 1.41E+02 |
| ENSG00000109576  | AADAT         | 0.55 | -1.81 | -0.86 | 1.67E-04 | -1.40E+02 | 1.40E+02 |
| ENSG00000182405  | PGBD4         | 0.59 | -1.70 | -0.77 | 1.47E-04 | -1.40E+02 | 1.40E+02 |
| ENSG00000157216  | SSBP3         | 1.34 | 1.34  | 0.42  | 9.23E-05 | 1.40E+02  | 1.40E+02 |
| ENSG00000070476  | ZXDC          | 1.35 | 1.35  | 0.44  | 9.47E-05 | 1.39E+02  | 1.39E+02 |
| ENSG00000254122  | PCDHGB7       | 1.75 | 1.75  | 0.81  | 1.58E-04 | 1.39E+02  | 1.39E+02 |
| ENSG00000176390  | CRLF3         | 0.75 | -1.34 | -0.42 | 9.29E-05 | -1.39E+02 | 1.39E+02 |
| ENSG00000215183  | MSMP          | 1.35 | 1.35  | 0.44  | 9.50E-05 | 1.39E+02  | 1.39E+02 |
| ENSG00000168517  | HEXIM2        | 1.59 | 1.59  | 0.67  | 1.33E-04 | 1.38E+02  | 1.38E+02 |
| ENSG00000130024  | PHF10         | 1.35 | 1.35  | 0.43  | 9.60E-05 | 1.37E+02  | 1.37E+02 |
| ENSG00000163528  | CHCHD4        | 0.74 | -1.36 | -0.44 | 9.74E-05 | -1.37E+02 | 1.37E+02 |
| ENSG00000131446  | MGAT1         | 0.73 | -1.36 | -0.45 | 9.89E-05 | -1.37E+02 | 1.37E+02 |

|                 |               |      |       |       |          |           |          |
|-----------------|---------------|------|-------|-------|----------|-----------|----------|
| ENSG00000123124 | WWP1          | 1.41 | 1.41  | 0.49  | 1.06E-04 | 1.37E+02  | 1.37E+02 |
| ENSG00000160570 | DEDD2         | 1.37 | 1.37  | 0.45  | 1.00E-04 | 1.37E+02  | 1.37E+02 |
| ENSG00000066056 | TIE1          | 1.37 | 1.37  | 0.45  | 1.00E-04 | 1.37E+02  | 1.37E+02 |
| ENSG00000168228 | ZCCHC4        | 0.71 | -1.40 | -0.49 | 1.06E-04 | -1.36E+02 | 1.36E+02 |
| ENSG00000163002 | NUP35         | 0.69 | -1.44 | -0.53 | 1.12E-04 | -1.36E+02 | 1.36E+02 |
| ENSG00000151117 | TMEM86A       | 1.58 | 1.58  | 0.66  | 1.34E-04 | 1.36E+02  | 1.36E+02 |
| ENSG00000161888 | SPC24         | 0.73 | -1.36 | -0.45 | 1.00E-04 | -1.36E+02 | 1.36E+02 |
| ENSG00000156414 | TDRD9         | 0.60 | -1.68 | -0.75 | 1.52E-04 | -1.36E+02 | 1.36E+02 |
| ENSG00000160172 | FAM86C2P      | 1.65 | 1.65  | 0.72  | 1.48E-04 | 1.36E+02  | 1.36E+02 |
| ENSG00000130363 | RSPH3         | 1.53 | 1.53  | 0.61  | 1.27E-04 | 1.36E+02  | 1.36E+02 |
| ENSG00000173614 | NMNAT1        | 1.38 | 1.38  | 0.46  | 1.03E-04 | 1.36E+02  | 1.36E+02 |
| ENSG00000049860 | HEXB          | 1.36 | 1.36  | 0.45  | 1.01E-04 | 1.35E+02  | 1.35E+02 |
| ENSG00000110811 | LEPREL2       | 0.75 | -1.34 | -0.42 | 9.80E-05 | -1.35E+02 | 1.35E+02 |
| ENSG00000130755 | GMFG          | 1.44 | 1.44  | 0.53  | 1.14E-04 | 1.35E+02  | 1.35E+02 |
| ENSG00000170537 | TMC7          | 1.47 | 1.47  | 0.56  | 1.19E-04 | 1.35E+02  | 1.35E+02 |
| ENSG00000248334 | WHAMMP2       | 1.42 | 1.42  | 0.51  | 1.11E-04 | 1.35E+02  | 1.35E+02 |
| ENSG00000197948 | FCHSD1        | 0.73 | -1.38 | -0.46 | 1.05E-04 | -1.34E+02 | 1.34E+02 |
| ENSG00000138678 | AGPAT9        | 1.39 | 1.39  | 0.48  | 1.08E-04 | 1.34E+02  | 1.34E+02 |
|                 | RP11-645N11.2 | 1.53 | 1.53  | 0.61  | 1.29E-04 | 1.34E+02  | 1.34E+02 |
| ENSG00000071051 | NCK2          | 1.34 | 1.34  | 0.42  | 9.96E-05 | 1.34E+02  | 1.34E+02 |
| ENSG00000072062 | PRKACA        | 0.73 | -1.37 | -0.45 | 1.05E-04 | -1.34E+02 | 1.34E+02 |
| ENSG00000112118 | MCM3          | 0.74 | -1.36 | -0.44 | 1.03E-04 | -1.34E+02 | 1.34E+02 |
| ENSG00000182272 | B4GALNT4      | 1.41 | 1.41  | 0.49  | 1.11E-04 | 1.34E+02  | 1.34E+02 |
| ENSG00000228506 | RP11-98I9.4   | 1.53 | 1.53  | 0.61  | 1.30E-04 | 1.34E+02  | 1.34E+02 |
| ENSG00000176593 | CTD-2368P22.1 | 1.54 | 1.54  | 0.63  | 1.33E-04 | 1.34E+02  | 1.34E+02 |
| ENSG00000099797 | TECR          | 0.74 | -1.35 | -0.43 | 1.03E-04 | -1.33E+02 | 1.33E+02 |
| ENSG00000147324 | MFHAS1        | 1.34 | 1.34  | 0.43  | 1.04E-04 | 1.32E+02  | 1.32E+02 |
| ENSG00000204176 | SYT15         | 1.76 | 1.76  | 0.82  | 1.80E-04 | 1.31E+02  | 1.31E+02 |
| ENSG00000113368 | LMNB1         | 0.72 | -1.38 | -0.47 | 1.11E-04 | -1.31E+02 | 1.31E+02 |
| ENSG00000005884 | ITGA3         | 1.46 | 1.46  | 0.54  | 1.24E-04 | 1.31E+02  | 1.31E+02 |
| ENSG00000125744 | RTN2          | 1.59 | 1.59  | 0.67  | 1.47E-04 | 1.31E+02  | 1.31E+02 |
| ENSG00000187608 | ISG15         | 0.71 | -1.41 | -0.50 | 1.17E-04 | -1.31E+02 | 1.31E+02 |
| ENSG00000165661 | QSOX2         | 1.40 | 1.40  | 0.49  | 1.15E-04 | 1.31E+02  | 1.31E+02 |
| ENSG00000242265 | PEG10         | 0.75 | -1.34 | -0.42 | 1.05E-04 | -1.31E+02 | 1.31E+02 |
| ENSG00000163191 | S100A11       | 1.35 | 1.35  | 0.43  | 1.08E-04 | 1.30E+02  | 1.30E+02 |
| ENSG00000170775 | GPR37         | 0.65 | -1.54 | -0.62 | 1.41E-04 | -1.30E+02 | 1.30E+02 |
| ENSG00000163625 | WDFY3         | 1.43 | 1.43  | 0.52  | 1.22E-04 | 1.29E+02  | 1.29E+02 |
| ENSG00000158023 | WDR66         | 1.56 | 1.56  | 0.64  | 1.46E-04 | 1.29E+02  | 1.29E+02 |
| ENSG00000259943 | RP1-39G22.7   | 0.66 | -1.51 | -0.59 | 1.37E-04 | -1.29E+02 | 1.29E+02 |
| ENSG00000143319 | ISG20L2       | 0.75 | -1.33 | -0.41 | 1.06E-04 | -1.29E+02 | 1.29E+02 |
| ENSG00000183020 | AP2A2         | 1.35 | 1.35  | 0.44  | 1.11E-04 | 1.29E+02  | 1.29E+02 |
| ENSG00000168116 | KIAA1586      | 0.71 | -1.42 | -0.50 | 1.22E-04 | -1.28E+02 | 1.28E+02 |
| ENSG00000087253 | LPCAT2        | 0.74 | -1.35 | -0.43 | 1.11E-04 | -1.28E+02 | 1.28E+02 |
| ENSG00000168090 | COPS6         | 0.74 | -1.35 | -0.43 | 1.11E-04 | -1.28E+02 | 1.28E+02 |
| ENSG00000270022 | RNU12         | 0.57 | -1.75 | -0.81 | 1.87E-04 | -1.28E+02 | 1.28E+02 |
| ENSG00000197635 | DPP4          | 1.33 | 1.33  | 0.41  | 1.08E-04 | 1.27E+02  | 1.27E+02 |
| ENSG00000142731 | PLK4          | 0.71 | -1.41 | -0.50 | 1.24E-04 | -1.27E+02 | 1.27E+02 |
| ENSG00000135272 | MDFIC         | 0.74 | -1.35 | -0.43 | 1.13E-04 | -1.27E+02 | 1.27E+02 |
| ENSG00000165914 | TTC7B         | 1.44 | 1.44  | 0.52  | 1.28E-04 | 1.27E+02  | 1.27E+02 |
| ENSG00000169925 | BRD3          | 1.36 | 1.36  | 0.44  | 1.14E-04 | 1.27E+02  | 1.27E+02 |
| ENSG00000232119 | MCTS1         | 1.37 | 1.37  | 0.45  | 1.17E-04 | 1.26E+02  | 1.26E+02 |
| ENSG00000138002 | IFT172        | 0.73 | -1.37 | -0.46 | 1.19E-04 | -1.26E+02 | 1.26E+02 |
| ENSG00000172661 | FAM21C        | 1.38 | 1.38  | 0.46  | 1.20E-04 | 1.26E+02  | 1.26E+02 |
| ENSG00000164023 | SGMS2         | 0.72 | -1.38 | -0.47 | 1.21E-04 | -1.26E+02 | 1.26E+02 |
| ENSG00000178761 | FAM219B       | 0.75 | -1.33 | -0.42 | 1.13E-04 | -1.25E+02 | 1.25E+02 |
| ENSG00000151503 | NCAPD3        | 0.74 | -1.34 | -0.43 | 1.15E-04 | -1.25E+02 | 1.25E+02 |
| ENSG00000182934 | SRPR          | 0.70 | -1.43 | -0.51 | 1.30E-04 | -1.25E+02 | 1.25E+02 |
| ENSG00000156136 | DCK           | 0.75 | -1.33 | -0.41 | 1.14E-04 | -1.25E+02 | 1.25E+02 |
| ENSG00000170653 | ATF7          | 1.36 | 1.36  | 0.44  | 1.20E-04 | 1.24E+02  | 1.24E+02 |
| ENSG00000157617 | C2CD2         | 1.35 | 1.35  | 0.43  | 1.19E-04 | 1.24E+02  | 1.24E+02 |
| ENSG00000146281 | PM20D2        | 1.33 | 1.33  | 0.41  | 1.16E-04 | 1.24E+02  | 1.24E+02 |
| ENSG00000102362 | SYTL4         | 0.75 | -1.33 | -0.41 | 1.17E-04 | -1.23E+02 | 1.23E+02 |
| ENSG00000237292 | RP11-540K16.1 | 1.62 | 1.62  | 0.70  | 1.74E-04 | 1.23E+02  | 1.23E+02 |
| ENSG00000171992 | SYNPO         | 1.43 | 1.43  | 0.52  | 1.36E-04 | 1.23E+02  | 1.23E+02 |
| ENSG00000111665 | CDCA3         | 0.71 | -1.40 | -0.49 | 1.31E-04 | -1.23E+02 | 1.23E+02 |
| ENSG00000175906 | ARL4D         | 0.61 | -1.63 | -0.70 | 1.76E-04 | -1.23E+02 | 1.23E+02 |
| ENSG00000169826 | CSGALNACT2    | 1.34 | 1.34  | 0.42  | 1.21E-04 | 1.22E+02  | 1.22E+02 |
| ENSG00000169627 | BOLA2B        | 0.55 | -1.80 | -0.85 | 2.20E-04 | -1.22E+02 | 1.22E+02 |
| ENSG00000270647 | TAF15         | 0.72 | -1.38 | -0.47 | 1.32E-04 | -1.20E+02 | 1.20E+02 |
| ENSG00000054965 | FAM168A       | 1.34 | 1.34  | 0.42  | 1.25E-04 | 1.20E+02  | 1.20E+02 |
| ENSG00000181472 | ZBTB2         | 0.76 | -1.32 | -0.41 | 1.22E-04 | -1.20E+02 | 1.20E+02 |
| ENSG00000144815 | NXPE3         | 0.67 | -1.50 | -0.59 | 1.57E-04 | -1.20E+02 | 1.20E+02 |
| ENSG00000179981 | TSHZ1         | 1.35 | 1.35  | 0.43  | 1.27E-04 | 1.20E+02  | 1.20E+02 |
| ENSG00000184979 | USP18         | 0.74 | -1.35 | -0.43 | 1.28E-04 | -1.19E+02 | 1.19E+02 |
| ENSG00000119632 | IFI27L2       | 0.71 | -1.41 | -0.50 | 1.41E-04 | -1.19E+02 | 1.19E+02 |
| ENSG00000129003 | VPS13C        | 1.76 | 1.76  | 0.82  | 2.20E-04 | 1.19E+02  | 1.19E+02 |
| ENSG00000197879 | MYO1C         | 0.74 | -1.35 | -0.44 | 1.30E-04 | -1.18E+02 | 1.18E+02 |
| ENSG00000171241 | SHCBP1        | 0.74 | -1.35 | -0.44 | 1.31E-04 | -1.18E+02 | 1.18E+02 |
| ENSG00000204370 | SDHD          | 0.73 | -1.36 | -0.45 | 1.33E-04 | -1.18E+02 | 1.18E+02 |

|                 |              |      |       |       |          |           |          |
|-----------------|--------------|------|-------|-------|----------|-----------|----------|
| ENSG00000246273 | SBF2-AS1     | 1.68 | 1.68  | 0.75  | 2.02E-04 | 1.18E+02  | 1.18E+02 |
| ENSG00000102218 | RP2          | 1.35 | 1.35  | 0.44  | 1.32E-04 | 1.18E+02  | 1.18E+02 |
| ENSG00000123600 | METTL8       | 0.75 | -1.33 | -0.42 | 1.28E-04 | -1.18E+02 | 1.18E+02 |
| ENSG00000124786 | SLC35B3      | 1.34 | 1.34  | 0.42  | 1.30E-04 | 1.18E+02  | 1.18E+02 |
| ENSG00000153786 | ZDHHC7       | 1.36 | 1.36  | 0.44  | 1.34E-04 | 1.17E+02  | 1.17E+02 |
| ENSG00000156697 | UTP14A       | 0.75 | -1.33 | -0.41 | 1.28E-04 | -1.17E+02 | 1.17E+02 |
| ENSG00000075275 | CELSR1       | 1.60 | 1.60  | 0.68  | 1.87E-04 | 1.17E+02  | 1.17E+02 |
| ENSG00000059377 | TBXAS1       | 0.61 | -1.63 | -0.70 | 1.94E-04 | -1.17E+02 | 1.17E+02 |
| ENSG00000123870 | ZNF137P      | 1.81 | 1.81  | 0.85  | 2.40E-04 | 1.17E+02  | 1.17E+02 |
| ENSG00000089063 | TMEM230      | 0.75 | -1.34 | -0.42 | 1.32E-04 | -1.17E+02 | 1.17E+02 |
| ENSG00000117748 | RPA2         | 0.75 | -1.33 | -0.41 | 1.30E-04 | -1.17E+02 | 1.17E+02 |
| ENSG00000159720 | ATP6V0D1     | 1.47 | 1.47  | 0.55  | 1.59E-04 | 1.16E+02  | 1.16E+02 |
| ENSG00000146842 | TMEM209      | 1.33 | 1.33  | 0.41  | 1.31E-04 | 1.16E+02  | 1.16E+02 |
| ENSG00000055163 | CYFIP2       | 1.36 | 1.36  | 0.44  | 1.37E-04 | 1.16E+02  | 1.16E+02 |
| ENSG00000163453 | IGFBP7       | 1.41 | 1.41  | 0.50  | 1.50E-04 | 1.16E+02  | 1.16E+02 |
| ENSG00000185480 | PARPBP       | 0.67 | -1.49 | -0.58 | 1.67E-04 | -1.15E+02 | 1.15E+02 |
| ENSG00000178719 | GRINA        | 1.36 | 1.36  | 0.44  | 1.40E-04 | 1.15E+02  | 1.15E+02 |
| ENSG00000197045 | GMFB         | 1.46 | 1.46  | 0.54  | 1.62E-04 | 1.15E+02  | 1.15E+02 |
| ENSG00000163517 | HDAC11       | 1.42 | 1.42  | 0.51  | 1.54E-04 | 1.15E+02  | 1.15E+02 |
| ENSG00000177352 | CCDC71       | 0.70 | -1.44 | -0.52 | 1.58E-04 | -1.15E+02 | 1.15E+02 |
| ENSG00000102858 | MGRN1        | 1.42 | 1.42  | 0.51  | 1.55E-04 | 1.14E+02  | 1.14E+02 |
| ENSG00000185420 | SMYD3        | 0.72 | -1.39 | -0.48 | 1.48E-04 | -1.14E+02 | 1.14E+02 |
| ENSG00000166582 | CENPV        | 0.75 | -1.33 | -0.41 | 1.35E-04 | -1.14E+02 | 1.14E+02 |
| ENSG00000100425 | BRD1         | 1.37 | 1.37  | 0.45  | 1.43E-04 | 1.14E+02  | 1.14E+02 |
| ENSG00000099246 | RAB18        | 1.37 | 1.37  | 0.45  | 1.44E-04 | 1.14E+02  | 1.14E+02 |
| ENSG00000131477 | RAMP2        | 1.45 | 1.45  | 0.54  | 1.62E-04 | 1.14E+02  | 1.14E+02 |
| ENSG00000137331 | IER3         | 0.74 | -1.35 | -0.43 | 1.41E-04 | -1.14E+02 | 1.14E+02 |
| ENSG00000123143 | PKN1         | 1.41 | 1.41  | 0.49  | 1.54E-04 | 1.13E+02  | 1.13E+02 |
| ENSG00000160789 | LMNA         | 1.38 | 1.38  | 0.46  | 1.48E-04 | 1.13E+02  | 1.13E+02 |
| ENSG00000109686 | SH3D19       | 1.36 | 1.36  | 0.44  | 1.45E-04 | 1.12E+02  | 1.12E+02 |
| ENSG00000175595 | ERCC4        | 1.33 | 1.33  | 0.41  | 1.41E-04 | 1.12E+02  | 1.12E+02 |
| ENSG00000225938 | RP4-575N6.4  | 1.52 | 1.52  | 0.61  | 1.86E-04 | 1.12E+02  | 1.12E+02 |
| ENSG00000222076 | RNU2-3P      | 0.46 | -2.19 | -1.13 | 3.82E-04 | -1.12E+02 | 1.12E+02 |
| ENSG00000119383 | PPP2R4       | 1.35 | 1.35  | 0.44  | 1.47E-04 | 1.12E+02  | 1.12E+02 |
| ENSG00000166439 | RNF169       | 1.34 | 1.34  | 0.43  | 1.45E-04 | 1.12E+02  | 1.12E+02 |
| ENSG00000033327 | GAB2         | 1.34 | 1.34  | 0.42  | 1.44E-04 | 1.12E+02  | 1.12E+02 |
| ENSG0000013573  | DDX11        | 0.73 | -1.38 | -0.46 | 1.53E-04 | -1.11E+02 | 1.11E+02 |
| ENSG00000104774 | MAN2B1       | 0.66 | -1.52 | -0.60 | 1.87E-04 | -1.11E+02 | 1.11E+02 |
| ENSG00000160445 | ZER1         | 1.36 | 1.36  | 0.44  | 1.49E-04 | 1.11E+02  | 1.11E+02 |
| ENSG00000214087 | ARL16        | 0.73 | -1.37 | -0.45 | 1.51E-04 | -1.11E+02 | 1.11E+02 |
| ENSG00000067221 | STOML1       | 1.38 | 1.38  | 0.47  | 1.55E-04 | 1.11E+02  | 1.11E+02 |
| ENSG00000136404 | TM6SF1       | 1.33 | 1.33  | 0.41  | 1.44E-04 | 1.11E+02  | 1.11E+02 |
| ENSG00000118162 | KPTN         | 0.68 | -1.48 | -0.56 | 1.79E-04 | -1.11E+02 | 1.11E+02 |
| ENSG00000115942 | ORC2         | 0.75 | -1.33 | -0.41 | 1.44E-04 | -1.11E+02 | 1.11E+02 |
| ENSG00000186088 | PION         | 1.48 | 1.48  | 0.56  | 1.79E-04 | 1.10E+02  | 1.10E+02 |
| ENSG00000234284 | ZNF879       | 1.39 | 1.39  | 0.48  | 1.60E-04 | 1.10E+02  | 1.10E+02 |
| ENSG00000076706 | MCAM         | 1.36 | 1.36  | 0.44  | 1.52E-04 | 1.10E+02  | 1.10E+02 |
| ENSG00000016864 | GLT8D1       | 0.75 | -1.33 | -0.41 | 1.46E-04 | -1.10E+02 | 1.10E+02 |
| ENSG00000214114 | MYCBP        | 0.75 | -1.33 | -0.41 | 1.47E-04 | -1.10E+02 | 1.10E+02 |
| ENSG00000164933 | SLC25A32     | 0.75 | -1.34 | -0.42 | 1.49E-04 | -1.10E+02 | 1.10E+02 |
| ENSG00000128709 | HOXD9        | 1.55 | 1.55  | 0.63  | 2.01E-04 | 1.09E+02  | 1.09E+02 |
| ENSG00000141985 | SH3GL1       | 1.36 | 1.36  | 0.44  | 1.55E-04 | 1.09E+02  | 1.09E+02 |
| ENSG00000204934 | ATP6V0E2-AS1 | 1.51 | 1.51  | 0.59  | 1.95E-04 | 1.08E+02  | 1.08E+02 |
| ENSG00000170043 | TRAPPC1      | 1.59 | 1.59  | 0.67  | 2.17E-04 | 1.08E+02  | 1.08E+02 |
| ENSG00000121766 | ZCCHC17      | 0.75 | -1.33 | -0.41 | 1.52E-04 | -1.08E+02 | 1.08E+02 |
| ENSG00000130731 | C16orf13     | 0.75 | -1.33 | -0.41 | 1.52E-04 | -1.08E+02 | 1.08E+02 |
| ENSG00000115541 | HSPE1        | 0.72 | -1.38 | -0.47 | 1.65E-04 | -1.08E+02 | 1.08E+02 |
| ENSG00000083312 | TNPO1        | 1.43 | 1.43  | 0.52  | 1.77E-04 | 1.08E+02  | 1.08E+02 |
| ENSG00000182541 | LIMK2        | 1.34 | 1.34  | 0.43  | 1.59E-04 | 1.07E+02  | 1.07E+02 |
| ENSG00000151287 | TEX30        | 0.76 | -1.32 | -0.40 | 1.55E-04 | -1.07E+02 | 1.07E+02 |
| ENSG00000125843 | AP5S1        | 0.73 | -1.37 | -0.46 | 1.67E-04 | -1.06E+02 | 1.06E+02 |
| ENSG00000179912 | R3HDM2       | 1.39 | 1.39  | 0.48  | 1.72E-04 | 1.06E+02  | 1.06E+02 |
| ENSG00000127481 | UBR4         | 1.45 | 1.45  | 0.54  | 1.87E-04 | 1.06E+02  | 1.06E+02 |
| ENSG00000126822 | PLEKHG3      | 0.64 | -1.56 | -0.64 | 2.17E-04 | -1.06E+02 | 1.06E+02 |
| ENSG00000108604 | SMARCD2      | 0.75 | -1.34 | -0.42 | 1.59E-04 | -1.06E+02 | 1.06E+02 |
| ENSG00000164713 | BRI3         | 1.37 | 1.37  | 0.46  | 1.69E-04 | 1.05E+02  | 1.05E+02 |
| ENSG00000103044 | HAS3         | 0.37 | -2.70 | -1.43 | 6.61E-04 | -1.05E+02 | 1.05E+02 |
| ENSG00000139926 | FRMD5        | 1.35 | 1.35  | 0.43  | 1.64E-04 | 1.05E+02  | 1.05E+02 |
| ENSG00000206838 | SNORAS5A     | 1.83 | 1.83  | 0.87  | 3.07E-04 | 1.04E+02  | 1.04E+02 |
| ENSG00000198598 | MMP17        | 0.65 | -1.53 | -0.62 | 2.17E-04 | -1.04E+02 | 1.04E+02 |
| ENSG00000064666 | CNN2         | 1.43 | 1.43  | 0.52  | 1.89E-04 | 1.04E+02  | 1.04E+02 |
| ENSG00000148082 | SHC3         | 1.91 | 1.91  | 0.94  | 3.37E-04 | 1.04E+02  | 1.04E+02 |
| ENSG00000168394 | TAP1         | 1.32 | 1.32  | 0.40  | 1.60E-04 | 1.04E+02  | 1.04E+02 |
| ENSG00000104880 | ARHGEF18     | 1.35 | 1.35  | 0.43  | 1.69E-04 | 1.04E+02  | 1.04E+02 |
| ENSG00000162585 | C1orf86      | 1.38 | 1.38  | 0.47  | 1.78E-04 | 1.04E+02  | 1.04E+02 |
| ENSG00000233251 | AC007743.1   | 1.37 | 1.37  | 0.45  | 1.75E-04 | 1.04E+02  | 1.04E+02 |
| ENSG00000129968 | FAM108A1     | 1.32 | 1.32  | 0.40  | 1.62E-04 | 1.03E+02  | 1.03E+02 |
| ENSG00000099331 | MYO9B        | 1.37 | 1.37  | 0.46  | 1.77E-04 | 1.03E+02  | 1.03E+02 |
| ENSG00000197381 | ADARB1       | 1.33 | 1.33  | 0.41  | 1.67E-04 | 1.03E+02  | 1.03E+02 |

|                 |                |      |       |       |          |           |          |
|-----------------|----------------|------|-------|-------|----------|-----------|----------|
| ENSG00000025434 | NR1H3          | 0.64 | -1.57 | -0.65 | 2.36E-04 | -1.02E+02 | 1.02E+02 |
| ENSG00000186395 | KRT10          | 0.62 | -1.62 | -0.69 | 2.50E-04 | -1.02E+02 | 1.02E+02 |
| ENSG00000160336 | ZNF761         | 1.41 | 1.41  | 0.50  | 1.90E-04 | 1.02E+02  | 1.02E+02 |
| ENSG00000162396 | PARS2          | 1.45 | 1.45  | 0.53  | 2.00E-04 | 1.02E+02  | 1.02E+02 |
| ENSG00000071246 | VASH1          | 1.34 | 1.34  | 0.42  | 1.73E-04 | 1.02E+02  | 1.02E+02 |
| ENSG00000070087 | PFN2           | 0.74 | -1.35 | -0.43 | 1.74E-04 | -1.02E+02 | 1.02E+02 |
| ENSG00000250588 | IQCJ-SCHIP1    | 1.47 | 1.47  | 0.56  | 2.09E-04 | 1.02E+02  | 1.02E+02 |
| ENSG00000132600 | PRMT7          | 0.74 | -1.35 | -0.43 | 1.75E-04 | -1.02E+02 | 1.02E+02 |
| ENSG00000167535 | CACNB3         | 0.75 | -1.33 | -0.41 | 1.71E-04 | -1.02E+02 | 1.02E+02 |
| ENSG00000157450 | RNF111         | 1.34 | 1.34  | 0.42  | 1.74E-04 | 1.02E+02  | 1.02E+02 |
| ENSG00000260336 | RP11-395B7.7   | 1.47 | 1.47  | 0.55  | 2.11E-04 | 1.01E+02  | 1.01E+02 |
| ENSG00000131495 | NDUFA2         | 0.74 | -1.35 | -0.44 | 1.79E-04 | -1.01E+02 | 1.01E+02 |
| ENSG00000106603 | COA1           | 1.32 | 1.32  | 0.40  | 1.71E-04 | 1.01E+02  | 1.01E+02 |
| ENSG00000165102 | HGSNAT         | 1.32 | 1.32  | 0.40  | 1.72E-04 | 1.01E+02  | 1.01E+02 |
| ENSG00000123080 | CDKN2C         | 0.73 | -1.37 | -0.46 | 1.86E-04 | -1.01E+02 | 1.01E+02 |
| ENSG00000180901 | KCTD2          | 1.35 | 1.35  | 0.43  | 1.83E-04 | 9.99E+01  | 9.99E+01 |
| ENSG00000132256 | TRIM5          | 0.75 | -1.34 | -0.42 | 1.80E-04 | -9.97E+01 | 9.97E+01 |
| ENSG00000178913 | TAF7           | 1.35 | 1.35  | 0.43  | 1.84E-04 | 9.93E+01  | 9.93E+01 |
| ENSG00000174951 | FUT1           | 0.73 | -1.38 | -0.46 | 1.94E-04 | -9.89E+01 | 9.89E+01 |
| ENSG00000069424 | KCNAB2         | 1.65 | 1.65  | 0.72  | 2.80E-04 | 9.85E+01  | 9.85E+01 |
| ENSG00000104549 | SQLE           | 0.74 | -1.35 | -0.44 | 1.89E-04 | -9.84E+01 | 9.84E+01 |
| ENSG00000142178 | SIK1           | 1.45 | 1.45  | 0.54  | 2.20E-04 | 9.80E+01  | 9.80E+01 |
| ENSG00000149474 | CSRP2BP        | 1.37 | 1.37  | 0.45  | 1.96E-04 | 9.78E+01  | 9.78E+01 |
| ENSG00000048471 | SNX29          | 1.37 | 1.37  | 0.45  | 1.97E-04 | 9.73E+01  | 9.73E+01 |
| ENSG00000066379 | ZNRD1          | 0.75 | -1.33 | -0.42 | 1.89E-04 | -9.71E+01 | 9.71E+01 |
| ENSG00000166002 | C11orf75       | 0.65 | -1.55 | -0.63 | 2.57E-04 | -9.66E+01 | 9.66E+01 |
| ENSG00000200534 | SNORA33        | 0.59 | -1.69 | -0.76 | 3.06E-04 | -9.66E+01 | 9.66E+01 |
| ENSG00000115317 | HTRA2          | 1.32 | 1.32  | 0.40  | 1.87E-04 | 9.66E+01  | 9.66E+01 |
| ENSG00000185973 | TMLHE          | 0.73 | -1.38 | -0.46 | 2.04E-04 | -9.64E+01 | 9.64E+01 |
| ENSG00000139187 | KLRG1          | 0.73 | -1.37 | -0.45 | 2.03E-04 | -9.61E+01 | 9.61E+01 |
| ENSG00000186130 | ZBTB6          | 1.44 | 1.44  | 0.52  | 2.25E-04 | 9.59E+01  | 9.59E+01 |
| ENSG00000246089 | RP11-115C21.2  | 1.57 | 1.57  | 0.65  | 2.71E-04 | 9.56E+01  | 9.56E+01 |
| ENSG00000151229 | SLC2A13        | 1.44 | 1.44  | 0.52  | 2.27E-04 | 9.55E+01  | 9.55E+01 |
| ENSG00000100104 | SRRD           | 0.76 | -1.32 | -0.40 | 1.91E-04 | -9.54E+01 | 9.54E+01 |
| ENSG00000089050 | RBBP9          | 0.76 | -1.32 | -0.40 | 1.93E-04 | -9.53E+01 | 9.53E+01 |
| ENSG00000137942 | FNBP1L         | 1.37 | 1.37  | 0.46  | 2.09E-04 | 9.50E+01  | 9.50E+01 |
| ENSG00000065000 | AP3D1          | 1.37 | 1.37  | 0.45  | 2.07E-04 | 9.50E+01  | 9.50E+01 |
| ENSG00000143845 | ETNK2          | 0.73 | -1.38 | -0.46 | 2.12E-04 | -9.47E+01 | 9.47E+01 |
| ENSG00000099814 | KIAA0284       | 1.35 | 1.35  | 0.43  | 2.05E-04 | 9.43E+01  | 9.43E+01 |
| ENSG00000107738 | C10orf54       | 1.60 | 1.60  | 0.68  | 2.89E-04 | 9.43E+01  | 9.43E+01 |
| ENSG00000091317 | CMTM6          | 0.73 | -1.36 | -0.45 | 2.09E-04 | -9.43E+01 | 9.43E+01 |
| ENSG00000175832 | ETV4           | 1.33 | 1.33  | 0.41  | 2.01E-04 | 9.40E+01  | 9.40E+01 |
| ENSG00000164187 | LMBRD2         | 1.51 | 1.51  | 0.59  | 2.57E-04 | 9.40E+01  | 9.40E+01 |
| ENSG00000116898 | MRPS15         | 0.75 | -1.34 | -0.42 | 2.03E-04 | -9.40E+01 | 9.40E+01 |
| ENSG00000151611 | MMAA           | 1.43 | 1.43  | 0.51  | 2.31E-04 | 9.40E+01  | 9.40E+01 |
| ENSG00000115875 | SRSF7          | 0.74 | -1.35 | -0.43 | 2.06E-04 | -9.39E+01 | 9.39E+01 |
| ENSG00000147202 | DIAPH2         | 1.37 | 1.37  | 0.45  | 2.12E-04 | 9.39E+01  | 9.39E+01 |
| ENSG00000006453 | BAIAP2L1       | 1.50 | 1.50  | 0.58  | 2.55E-04 | 9.37E+01  | 9.37E+01 |
| ENSG00000146263 | RP11-1407O15.2 | 0.63 | -1.57 | -0.66 | 2.84E-04 | -9.35E+01 | 9.35E+01 |
| ENSG00000153406 | MMS22L         | 0.75 | -1.34 | -0.42 | 2.04E-04 | -9.35E+01 | 9.35E+01 |
| ENSG00000110911 | NMRAL1         | 0.76 | -1.32 | -0.40 | 1.98E-04 | -9.34E+01 | 9.34E+01 |
| ENSG00000135976 | SLC11A2        | 0.75 | -1.33 | -0.41 | 2.01E-04 | -9.34E+01 | 9.34E+01 |
| ENSG00000225792 | ANKRD36        | 1.37 | 1.37  | 0.45  | 2.14E-04 | 9.33E+01  | 9.33E+01 |
| ENSG00000264538 | AC004540.4     | 1.49 | 1.49  | 0.58  | 2.57E-04 | 9.31E+01  | 9.31E+01 |
| ENSG00000116138 | SUZ12P         | 0.69 | -1.46 | -0.54 | 2.46E-04 | -9.30E+01 | 9.30E+01 |
| ENSG00000100941 | DNAJC16        | 1.32 | 1.32  | 0.40  | 2.04E-04 | 9.27E+01  | 9.27E+01 |
| ENSG00000164576 | PNN            | 0.76 | -1.32 | -0.41 | 2.05E-04 | -9.26E+01 | 9.26E+01 |
| ENSG00000104756 | SAP30L         | 1.35 | 1.35  | 0.43  | 2.12E-04 | 9.25E+01  | 9.25E+01 |
| ENSG00000182325 | KCTD9          | 1.35 | 1.35  | 0.43  | 2.12E-04 | 9.24E+01  | 9.24E+01 |
| ENSG00000141499 | FBXL6          | 0.71 | -1.41 | -0.49 | 2.32E-04 | -9.23E+01 | 9.23E+01 |
| ENSG00000153037 | WRAP53         | 0.73 | -1.36 | -0.45 | 2.21E-04 | -9.17E+01 | 9.17E+01 |
| ENSG00000070495 | SRP19          | 0.73 | -1.37 | -0.46 | 2.25E-04 | -9.16E+01 | 9.16E+01 |
| ENSG00000100908 | JMJD6          | 1.32 | 1.32  | 0.40  | 2.07E-04 | 9.15E+01  | 9.15E+01 |
| ENSG00000176024 | EMC9           | 0.73 | -1.38 | -0.46 | 2.27E-04 | -9.14E+01 | 9.14E+01 |
| ENSG00000184990 | ZNF613         | 1.40 | 1.40  | 0.48  | 2.34E-04 | 9.12E+01  | 9.12E+01 |
| ENSG00000142279 | SIVA1          | 0.75 | -1.33 | -0.41 | 2.13E-04 | -9.12E+01 | 9.12E+01 |
| ENSG00000088256 | WTIP           | 0.74 | -1.35 | -0.43 | 2.19E-04 | -9.10E+01 | 9.10E+01 |
| ENSG00000169679 | GNA11          | 1.34 | 1.34  | 0.43  | 2.19E-04 | 9.09E+01  | 9.09E+01 |
| ENSG00000148339 | BUB1           | 0.75 | -1.34 | -0.42 | 2.18E-04 | -9.09E+01 | 9.09E+01 |
| ENSG00000139722 | SLC25A25       | 0.76 | -1.32 | -0.40 | 2.12E-04 | -9.07E+01 | 9.07E+01 |
| ENSG00000089685 | VPS37B         | 1.32 | 1.32  | 0.40  | 2.12E-04 | 9.06E+01  | 9.06E+01 |
| ENSG00000133083 | BIRC5          | 0.74 | -1.34 | -0.43 | 2.20E-04 | -9.06E+01 | 9.06E+01 |
| ENSG00000137575 | DCLK1          | 0.63 | -1.59 | -0.67 | 3.08E-04 | -9.06E+01 | 9.06E+01 |
| ENSG00000110700 | SDCBP          | 1.42 | 1.42  | 0.51  | 2.46E-04 | 9.06E+01  | 9.06E+01 |
| ENSG00000112249 | RPS13          | 0.73 | -1.37 | -0.45 | 2.28E-04 | -9.04E+01 | 9.04E+01 |
| ENSG00000172733 | ASCC3          | 1.48 | 1.48  | 0.57  | 2.68E-04 | 9.04E+01  | 9.04E+01 |
| ENSG00000068903 | PURG           | 1.55 | 1.55  | 0.63  | 2.94E-04 | 9.04E+01  | 9.04E+01 |
| ENSG00000188229 | SIRT2          | 1.33 | 1.33  | 0.42  | 2.18E-04 | 9.03E+01  | 9.03E+01 |
| ENSG00000188229 | TUBB4B         | 0.74 | -1.35 | -0.43 | 2.24E-04 | -9.02E+01 | 9.02E+01 |

|                 |              |      |       |       |          |           |          |
|-----------------|--------------|------|-------|-------|----------|-----------|----------|
| ENSG00000118263 | KLF7         | 1.36 | 1.36  | 0.44  | 2.26E-04 | 9.02E+01  | 9.02E+01 |
| ENSG00000149311 | ATM          | 1.60 | 1.60  | 0.68  | 3.17E-04 | 9.02E+01  | 9.02E+01 |
| ENSG00000083720 | OXCT1        | 0.75 | -1.33 | -0.41 | 2.18E-04 | -8.99E+01 | 8.99E+01 |
| ENSG00000111961 | SASH1        | 1.35 | 1.35  | 0.43  | 2.26E-04 | 8.97E+01  | 8.97E+01 |
| ENSG00000171488 | LRR8C        | 1.34 | 1.34  | 0.42  | 2.23E-04 | 8.96E+01  | 8.96E+01 |
| ENSG00000170989 | S1PR1        | 1.34 | 1.34  | 0.42  | 2.24E-04 | 8.94E+01  | 8.94E+01 |
| ENSG00000203326 | ZNF525       | 1.47 | 1.47  | 0.56  | 2.72E-04 | 8.93E+01  | 8.93E+01 |
| ENSG00000182158 | CREB3L2      | 1.35 | 1.35  | 0.43  | 2.29E-04 | 8.93E+01  | 8.93E+01 |
| ENSG00000148700 | ADD3         | 1.36 | 1.36  | 0.44  | 2.30E-04 | 8.93E+01  | 8.93E+01 |
| ENSG00000169871 | TRIM56       | 1.38 | 1.38  | 0.46  | 2.38E-04 | 8.92E+01  | 8.92E+01 |
| ENSG00000119471 | HSDL2        | 0.76 | -1.32 | -0.40 | 2.20E-04 | -8.91E+01 | 8.91E+01 |
| ENSG00000185596 | WASH3P       | 1.40 | 1.40  | 0.49  | 2.48E-04 | 8.91E+01  | 8.91E+01 |
| ENSG00000110011 | DNAJC4       | 0.72 | -1.39 | -0.48 | 2.44E-04 | -8.91E+01 | 8.91E+01 |
| ENSG00000092969 | TGFB2        | 1.38 | 1.38  | 0.46  | 2.39E-04 | 8.91E+01  | 8.91E+01 |
| ENSG00000169255 | B3GALNT1     | 0.74 | -1.35 | -0.43 | 2.29E-04 | -8.90E+01 | 8.90E+01 |
| ENSG00000247498 | RP11-392P7.6 | 0.65 | -1.53 | -0.62 | 2.98E-04 | -8.88E+01 | 8.88E+01 |
| ENSG00000135316 | SYNCRIP      | 0.74 | -1.35 | -0.43 | 2.32E-04 | -8.86E+01 | 8.86E+01 |
| ENSG00000053501 | USE1         | 0.69 | -1.46 | -0.54 | 2.71E-04 | -8.85E+01 | 8.85E+01 |
| ENSG00000214253 | FIS1         | 0.74 | -1.35 | -0.43 | 2.32E-04 | -8.84E+01 | 8.84E+01 |
| ENSG00000183814 | LIN9         | 0.71 | -1.40 | -0.49 | 2.52E-04 | -8.84E+01 | 8.84E+01 |
| ENSG00000164692 | COL1A2       | 0.56 | -1.77 | -0.83 | 4.03E-04 | -8.82E+01 | 8.82E+01 |
| ENSG00000150048 | CLEC1A       | 0.75 | -1.33 | -0.41 | 2.29E-04 | -8.78E+01 | 8.78E+01 |
| ENSG00000073146 | MOV10L1      | 0.75 | -1.34 | -0.42 | 2.33E-04 | -8.77E+01 | 8.77E+01 |
| ENSG00000076382 | SPAG5        | 0.73 | -1.37 | -0.45 | 2.43E-04 | -8.76E+01 | 8.76E+01 |
| ENSG00000101191 | DIDO1        | 1.36 | 1.36  | 0.44  | 2.41E-04 | 8.75E+01  | 8.75E+01 |
| ENSG00000007944 | MYLIP        | 0.71 | -1.41 | -0.49 | 2.59E-04 | -8.74E+01 | 8.74E+01 |
| ENSG00000234465 | PINLYP       | 0.58 | -1.73 | -0.79 | 3.90E-04 | -8.74E+01 | 8.74E+01 |
| ENSG00000099194 | SCD          | 0.74 | -1.36 | -0.44 | 2.41E-04 | -8.74E+01 | 8.74E+01 |
| ENSG00000099917 | MED15        | 1.32 | 1.32  | 0.40  | 2.28E-04 | 8.73E+01  | 8.73E+01 |
| ENSG00000160613 | PCSK7        | 0.76 | -1.31 | -0.39 | 2.25E-04 | -8.72E+01 | 8.72E+01 |
| ENSG00000166822 | TMEM170A     | 0.75 | -1.34 | -0.42 | 2.37E-04 | -8.70E+01 | 8.70E+01 |
| ENSG00000197122 | SRC          | 1.32 | 1.32  | 0.40  | 2.31E-04 | 8.68E+01  | 8.68E+01 |
| ENSG00000171453 | POLR1C       | 0.76 | -1.32 | -0.40 | 2.33E-04 | -8.62E+01 | 8.62E+01 |
| ENSG00000183250 | C21orf67     | 1.62 | 1.62  | 0.70  | 3.54E-04 | 8.62E+01  | 8.62E+01 |
| ENSG00000197958 | RPL12        | 0.75 | -1.34 | -0.42 | 2.42E-04 | -8.62E+01 | 8.62E+01 |
| ENSG00000197019 | SERTAD1      | 0.73 | -1.37 | -0.45 | 2.53E-04 | -8.62E+01 | 8.62E+01 |
| ENSG00000171812 | COL8A2       | 0.64 | -1.55 | -0.64 | 3.25E-04 | -8.61E+01 | 8.61E+01 |
| ENSG00000116747 | TROVE2       | 1.59 | 1.59  | 0.67  | 3.40E-04 | 8.61E+01  | 8.61E+01 |
| ENSG00000155252 | PI4K2A       | 1.31 | 1.31  | 0.39  | 2.32E-04 | 8.59E+01  | 8.59E+01 |
| ENSG00000151500 | THYN1        | 0.75 | -1.33 | -0.41 | 2.39E-04 | -8.58E+01 | 8.58E+01 |
| ENSG00000139832 | RAB20        | 0.58 | -1.72 | -0.79 | 4.04E-04 | -8.58E+01 | 8.58E+01 |
| ENSG00000166171 | DPCD         | 0.75 | -1.33 | -0.41 | 2.40E-04 | -8.58E+01 | 8.58E+01 |
| ENSG00000005243 | COPZ2        | 0.69 | -1.44 | -0.53 | 2.84E-04 | -8.56E+01 | 8.56E+01 |
| ENSG00000137776 | SLTM         | 1.37 | 1.37  | 0.45  | 2.56E-04 | 8.56E+01  | 8.56E+01 |
| ENSG00000198053 | SIRPA        | 1.35 | 1.35  | 0.43  | 2.49E-04 | 8.55E+01  | 8.55E+01 |
| ENSG00000183853 | KIRREL       | 1.45 | 1.45  | 0.54  | 2.89E-04 | 8.53E+01  | 8.53E+01 |
| ENSG00000099810 | MTAP         | 0.76 | -1.32 | -0.40 | 2.40E-04 | -8.51E+01 | 8.51E+01 |
| ENSG00000161654 | LSM12        | 0.75 | -1.33 | -0.41 | 2.46E-04 | -8.47E+01 | 8.47E+01 |
| ENSG00000199161 | MIR126       | 0.46 | -2.17 | -1.12 | 6.55E-04 | -8.47E+01 | 8.47E+01 |
| ENSG00000104518 | GSDMD        | 0.75 | -1.33 | -0.41 | 2.49E-04 | -8.44E+01 | 8.44E+01 |
| ENSG00000145029 | NICN1        | 0.68 | -1.46 | -0.55 | 3.01E-04 | -8.42E+01 | 8.42E+01 |
| ENSG00000105373 | GLTSCR2      | 0.75 | -1.34 | -0.42 | 2.53E-04 | -8.42E+01 | 8.42E+01 |
| ENSG00000166435 | XRR1         | 0.68 | -1.46 | -0.55 | 3.02E-04 | -8.40E+01 | 8.40E+01 |
| ENSG00000184178 | SCFD2        | 0.76 | -1.32 | -0.40 | 2.50E-04 | -8.35E+01 | 8.35E+01 |
| ENSG00000196159 | FAT4         | 1.34 | 1.34  | 0.42  | 2.57E-04 | 8.34E+01  | 8.34E+01 |
| ENSG00000109861 | CTSC         | 0.74 | -1.34 | -0.43 | 2.61E-04 | -8.32E+01 | 8.32E+01 |
| ENSG00000183688 | FAM101B      | 1.33 | 1.33  | 0.41  | 2.55E-04 | 8.31E+01  | 8.31E+01 |
| ENSG00000055950 | MRPL43       | 0.76 | -1.31 | -0.39 | 2.51E-04 | -8.28E+01 | 8.28E+01 |
| ENSG00000152465 | NMT2         | 1.35 | 1.35  | 0.43  | 2.66E-04 | 8.28E+01  | 8.28E+01 |
| ENSG00000143862 | ARL8A        | 1.33 | 1.33  | 0.41  | 2.61E-04 | 8.26E+01  | 8.26E+01 |
| ENSG00000115365 | LANCL1       | 0.73 | -1.36 | -0.45 | 2.73E-04 | -8.26E+01 | 8.26E+01 |
| ENSG00000159399 | HK2          | 0.72 | -1.40 | -0.48 | 2.88E-04 | -8.23E+01 | 8.23E+01 |
| ENSG00000138069 | RAB1A        | 1.35 | 1.35  | 0.43  | 2.70E-04 | 8.22E+01  | 8.22E+01 |
| ENSG00000216937 | CCDC7        | 1.64 | 1.64  | 0.72  | 4.02E-04 | 8.19E+01  | 8.19E+01 |
| ENSG00000196636 | ACN9         | 0.68 | -1.47 | -0.55 | 3.24E-04 | -8.16E+01 | 8.16E+01 |
| ENSG00000127445 | PIN1         | 0.75 | -1.34 | -0.42 | 2.70E-04 | -8.15E+01 | 8.15E+01 |
| ENSG00000273983 | HIST1H3G     | 0.73 | -1.36 | -0.45 | 2.81E-04 | -8.14E+01 | 8.14E+01 |
| ENSG00000140750 | ARHGAP17     | 1.49 | 1.49  | 0.58  | 3.38E-04 | 8.13E+01  | 8.13E+01 |
| ENSG00000156026 | MCU          | 0.74 | -1.34 | -0.43 | 2.74E-04 | -8.13E+01 | 8.13E+01 |
| ENSG00000215256 | DHRS4-AS1    | 0.70 | -1.42 | -0.51 | 3.06E-04 | -8.12E+01 | 8.12E+01 |
| ENSG00000069122 | GPR116       | 1.35 | 1.35  | 0.44  | 2.79E-04 | 8.11E+01  | 8.11E+01 |
| ENSG00000167977 | KCTD5        | 1.31 | 1.31  | 0.39  | 2.61E-04 | 8.10E+01  | 8.10E+01 |
| ENSG00000144118 | RALB         | 0.75 | -1.34 | -0.42 | 2.74E-04 | -8.10E+01 | 8.10E+01 |
| ENSG00000198198 | SZT2         | 1.33 | 1.33  | 0.41  | 2.71E-04 | 8.07E+01  | 8.07E+01 |
| ENSG00000177426 | TGIF1        | 1.32 | 1.32  | 0.40  | 2.69E-04 | 8.03E+01  | 8.03E+01 |
| ENSG00000167670 | CHAF1A       | 0.74 | -1.34 | -0.43 | 2.80E-04 | -8.02E+01 | 8.02E+01 |
| ENSG00000155640 | C10orf12     | 1.34 | 1.34  | 0.42  | 2.79E-04 | 8.00E+01  | 8.00E+01 |
| ENSG00000027075 | PRKCH        | 1.34 | 1.34  | 0.42  | 2.79E-04 | 8.00E+01  | 8.00E+01 |
| ENSG00000131368 | MRPS25       | 0.76 | -1.31 | -0.39 | 2.69E-04 | -8.00E+01 | 8.00E+01 |

|                  |                    |      |       |       |          |           |          |
|------------------|--------------------|------|-------|-------|----------|-----------|----------|
| ENSG0000001630   | CYP51A1            | 0.66 | -1.53 | -0.61 | 3.64E-04 | -7.99E+01 | 7.99E+01 |
| ENSG00000131100  | ATPGV1E1           | 1.33 | 1.33  | 0.41  | 2.76E-04 | 7.99E+01  | 7.99E+01 |
| ENSG00000001497  | LAS1L              | 0.76 | -1.31 | -0.39 | 2.71E-04 | -7.99E+01 | 7.99E+01 |
| ENSG00000184916  | JAG2               | 1.32 | 1.32  | 0.40  | 2.73E-04 | 7.98E+01  | 7.98E+01 |
| ENSG00000117868  | ESYT2              | 1.34 | 1.34  | 0.42  | 2.82E-04 | 7.96E+01  | 7.96E+01 |
| ENSG00000130956  | HABP4              | 1.35 | 1.35  | 0.43  | 2.87E-04 | 7.95E+01  | 7.95E+01 |
| ENSG00000175455  | CCDC14             | 0.71 | -1.40 | -0.49 | 3.12E-04 | -7.93E+01 | 7.93E+01 |
| ENSG00000100284  | TOM1               | 1.33 | 1.33  | 0.41  | 2.82E-04 | 7.92E+01  | 7.92E+01 |
| ENSG00000159202  | UBE2Z              | 0.75 | -1.33 | -0.41 | 2.81E-04 | -7.91E+01 | 7.91E+01 |
| ENSG00000137500  | CCDC90B            | 1.33 | 1.33  | 0.41  | 2.81E-04 | 7.91E+01  | 7.91E+01 |
| ENSG00000154760  | SLFN13             | 0.63 | -1.57 | -0.66 | 3.98E-04 | -7.89E+01 | 7.89E+01 |
| ENSG00000182983  | ZNF662             | 0.60 | -1.67 | -0.74 | 4.48E-04 | -7.87E+01 | 7.87E+01 |
| ENSG00000112306  | RPS12              | 0.72 | -1.38 | -0.47 | 3.09E-04 | -7.86E+01 | 7.86E+01 |
| ENSG00000150477  | KIAA1328           | 1.40 | 1.40  | 0.48  | 3.17E-04 | 7.85E+01  | 7.85E+01 |
| ENSG00000070367  | EXOC5              | 1.52 | 1.52  | 0.60  | 3.75E-04 | 7.84E+01  | 7.84E+01 |
| ENSG00000106537  | TSPAN13            | 1.39 | 1.39  | 0.47  | 3.14E-04 | 7.84E+01  | 7.84E+01 |
| ENSG00000205659  | LIN52              | 0.74 | -1.35 | -0.43 | 2.98E-04 | -7.83E+01 | 7.83E+01 |
| ENSG00000007255  | TRAPPC6A           | 1.41 | 1.41  | 0.50  | 3.27E-04 | 7.82E+01  | 7.82E+01 |
| ENSG000000264469 | RP11-173M1.8       | 0.67 | -1.50 | -0.59 | 3.69E-04 | -7.81E+01 | 7.81E+01 |
| ENSG00000113273  | ARSB               | 1.31 | 1.31  | 0.39  | 2.83E-04 | 7.79E+01  | 7.79E+01 |
| ENSG00000167702  | KIFC2              | 1.43 | 1.43  | 0.51  | 3.36E-04 | 7.78E+01  | 7.78E+01 |
| ENSG00000065057  | NTHL1              | 0.76 | -1.32 | -0.40 | 2.88E-04 | -7.78E+01 | 7.78E+01 |
| ENSG00000166949  | SMAD3              | 1.39 | 1.39  | 0.48  | 3.22E-04 | 7.76E+01  | 7.76E+01 |
| ENSG00000179361  | ARID3B             | 1.42 | 1.42  | 0.51  | 3.37E-04 | 7.74E+01  | 7.74E+01 |
| ENSG00000133657  | ATP13A3            | 1.32 | 1.32  | 0.41  | 2.93E-04 | 7.74E+01  | 7.74E+01 |
| ENSG00000164114  | MAP9               | 1.85 | 1.85  | 0.89  | 5.74E-04 | 7.72E+01  | 7.72E+01 |
| ENSG00000110987  | BCL7A              | 1.35 | 1.35  | 0.44  | 3.08E-04 | 7.71E+01  | 7.71E+01 |
| ENSG00000073969  | NSF                | 0.76 | -1.31 | -0.39 | 2.91E-04 | -7.68E+01 | 7.68E+01 |
| ENSG00000162836  | ACP6               | 1.41 | 1.41  | 0.49  | 3.39E-04 | 7.66E+01  | 7.66E+01 |
| ENSG00000187951  | ARHGAP11B          | 0.67 | -1.48 | -0.57 | 3.78E-04 | -7.63E+01 | 7.63E+01 |
| ENSG00000166454  | ATMIN              | 1.33 | 1.33  | 0.41  | 3.03E-04 | 7.61E+01  | 7.61E+01 |
| ENSG00000166946  | CCNDBP1            | 0.76 | -1.31 | -0.39 | 2.97E-04 | -7.60E+01 | 7.60E+01 |
| ENSG00000257727  | CNPY2              | 0.75 | -1.34 | -0.42 | 3.10E-04 | -7.59E+01 | 7.59E+01 |
| ENSG00000075568  | TMEM131            | 1.36 | 1.36  | 0.44  | 3.21E-04 | 7.59E+01  | 7.59E+01 |
| ENSG00000120868  | APAF1              | 1.33 | 1.33  | 0.41  | 3.08E-04 | 7.58E+01  | 7.58E+01 |
| ENSG00000139324  | TMTC3              | 1.61 | 1.61  | 0.69  | 4.52E-04 | 7.58E+01  | 7.58E+01 |
| ENSG00000267383  | CTC-260E6.6        | 1.54 | 1.54  | 0.62  | 4.12E-04 | 7.57E+01  | 7.57E+01 |
| ENSG00000143179  | UCK2               | 0.75 | -1.33 | -0.42 | 3.10E-04 | -7.57E+01 | 7.57E+01 |
| ENSG00000158352  | SHROOM4            | 1.33 | 1.33  | 0.41  | 3.07E-04 | 7.57E+01  | 7.57E+01 |
| ENSG00000160360  | GPSM1              | 1.32 | 1.32  | 0.40  | 3.04E-04 | 7.56E+01  | 7.56E+01 |
| ENSG00000124486  | USP9X              | 1.34 | 1.34  | 0.43  | 3.15E-04 | 7.56E+01  | 7.56E+01 |
| ENSG00000139278  | GLIPR1             | 1.41 | 1.41  | 0.50  | 3.48E-04 | 7.56E+01  | 7.56E+01 |
| ENSG00000116151  | MORN1              | 1.56 | 1.56  | 0.64  | 4.27E-04 | 7.55E+01  | 7.55E+01 |
| ENSG00000176371  | ZSCAN2             | 1.33 | 1.33  | 0.41  | 3.11E-04 | 7.55E+01  | 7.55E+01 |
| ENSG00000150967  | ABCB9              | 1.34 | 1.34  | 0.42  | 3.16E-04 | 7.54E+01  | 7.54E+01 |
| ENSG00000139977  | NAA30              | 1.32 | 1.32  | 0.40  | 3.08E-04 | 7.54E+01  | 7.54E+01 |
| ENSG00000204580  | DDR1               | 0.72 | -1.40 | -0.48 | 3.46E-04 | -7.52E+01 | 7.52E+01 |
| ENSG00000089060  | SLC24A6            | 1.31 | 1.31  | 0.39  | 3.04E-04 | 7.51E+01  | 7.51E+01 |
| ENSG00000114867  | EIF4G1             | 1.45 | 1.45  | 0.54  | 3.75E-04 | 7.50E+01  | 7.50E+01 |
| ENSG00000146410  | FAM54A             | 0.69 | -1.45 | -0.54 | 3.77E-04 | -7.49E+01 | 7.49E+01 |
| ENSG00000172671  | ZFAND4             | 0.71 | -1.40 | -0.49 | 3.50E-04 | -7.49E+01 | 7.49E+01 |
| ENSG00000100647  | KIAA0247           | 1.32 | 1.32  | 0.40  | 3.10E-04 | 7.48E+01  | 7.48E+01 |
| ENSG00000158828  | PINK1              | 1.35 | 1.35  | 0.44  | 3.28E-04 | 7.48E+01  | 7.48E+01 |
| ENSG00000269825  | ABC7-42389800N19.1 | 1.44 | 1.44  | 0.53  | 3.72E-04 | 7.47E+01  | 7.47E+01 |
| ENSG00000176225  | CTD-3099C6.9       | 0.73 | -1.38 | -0.46 | 3.40E-04 | -7.47E+01 | 7.47E+01 |
| ENSG00000139372  | RTTN               | 0.75 | -1.34 | -0.42 | 3.20E-04 | -7.46E+01 | 7.46E+01 |
| ENSG00000136014  | TDG                | 0.76 | -1.31 | -0.39 | 3.09E-04 | -7.46E+01 | 7.46E+01 |
| ENSG00000127418  | USP44              | 0.61 | -1.63 | -0.70 | 4.77E-04 | -7.45E+01 | 7.45E+01 |
| ENSG00000101782  | FGFRL1             | 1.50 | 1.50  | 0.58  | 4.05E-04 | 7.44E+01  | 7.44E+01 |
| ENSG00000168564  | RIOK3              | 1.33 | 1.33  | 0.41  | 3.19E-04 | 7.44E+01  | 7.44E+01 |
| ENSG00000203705  | CDKN2AIP           | 1.31 | 1.31  | 0.39  | 3.10E-04 | 7.44E+01  | 7.44E+01 |
| ENSG00000284038  | TATDN3             | 1.33 | 1.33  | 0.41  | 3.18E-04 | 7.43E+01  | 7.43E+01 |
| ENSG00000095261  | RP6-109B7.3        | 0.69 | -1.45 | -0.53 | 3.80E-04 | -7.42E+01 | 7.42E+01 |
| ENSG00000213096  | hsa-mir-10a        | 1.59 | 1.59  | 0.67  | 4.62E-04 | 7.40E+01  | 7.40E+01 |
| ENSG00000174125  | PSMD5              | 0.75 | -1.33 | -0.42 | 3.25E-04 | -7.40E+01 | 7.40E+01 |
| ENSG00000158793  | ZNF254             | 1.33 | 1.33  | 0.41  | 3.23E-04 | 7.40E+01  | 7.40E+01 |
| ENSG00000237441  | TLR1               | 0.65 | -1.53 | -0.61 | 4.32E-04 | -7.37E+01 | 7.37E+01 |
| ENSG00000122550  | NIT1               | 0.74 | -1.35 | -0.43 | 3.35E-04 | -7.36E+01 | 7.36E+01 |
| ENSG00000101596  | RLG2               | 0.77 | -1.30 | -0.38 | 3.13E-04 | -7.35E+01 | 7.35E+01 |
| ENSG00000149499  | KLHL7              | 1.31 | 1.31  | 0.39  | 3.20E-04 | 7.34E+01  | 7.34E+01 |
| ENSG00000160551  | SMCHD1             | 1.47 | 1.47  | 0.56  | 4.04E-04 | 7.34E+01  | 7.34E+01 |
| ENSG00000177685  | EML3               | 0.76 | -1.31 | -0.39 | 3.21E-04 | -7.32E+01 | 7.32E+01 |
| ENSG00000006125  | TAOK1              | 1.37 | 1.37  | 0.46  | 3.54E-04 | 7.30E+01  | 7.30E+01 |
| ENSG00000273802  | EFCAB4A            | 0.59 | -1.69 | -0.76 | 5.37E-04 | -7.30E+01 | 7.30E+01 |
| ENSG0000010327   | AP2B1              | 1.37 | 1.37  | 0.46  | 3.53E-04 | 7.30E+01  | 7.30E+01 |
| ENSG00000119787  | HIST1H2BG          | 0.74 | -1.35 | -0.43 | 3.43E-04 | -7.29E+01 | 7.29E+01 |
| ENSG00000146592  | STAB1              | 1.34 | 1.34  | 0.42  | 3.37E-04 | 7.28E+01  | 7.28E+01 |
|                  | ATL2               | 0.76 | -1.32 | -0.40 | 3.27E-04 | -7.28E+01 | 7.28E+01 |
|                  | CREB5              | 1.40 | 1.40  | 0.49  | 3.72E-04 | 7.27E+01  | 7.27E+01 |

|                 |                |      |       |       |          |           |          |
|-----------------|----------------|------|-------|-------|----------|-----------|----------|
| ENSG00000168495 | POLR3D         | 1.30 | 1.30  | 0.38  | 3.23E-04 | 7.26E+01  | 7.26E+01 |
| ENSG00000040199 | PHLPP2         | 0.74 | -1.35 | -0.43 | 3.46E-04 | -7.26E+01 | 7.26E+01 |
| ENSG00000206503 | HLA-A          | 1.34 | 1.34  | 0.42  | 3.42E-04 | 7.24E+01  | 7.24E+01 |
| ENSG00000155016 | CYP2U1         | 0.73 | -1.36 | -0.45 | 3.55E-04 | -7.23E+01 | 7.23E+01 |
| ENSG00000079102 | RUNX1T1        | 0.75 | -1.33 | -0.41 | 3.38E-04 | -7.22E+01 | 7.22E+01 |
| ENSG00000138134 | STAMBP1        | 0.61 | -1.64 | -0.72 | 5.19E-04 | -7.21E+01 | 7.21E+01 |
| ENSG00000072364 | AFF4           | 1.33 | 1.33  | 0.42  | 3.42E-04 | 7.21E+01  | 7.21E+01 |
| ENSG00000067225 | PKM            | 1.37 | 1.37  | 0.46  | 3.64E-04 | 7.20E+01  | 7.20E+01 |
| ENSG00000197362 | ZNF786         | 0.72 | -1.40 | -0.48 | 3.77E-04 | -7.19E+01 | 7.19E+01 |
| ENSG00000198824 | CHAMP1         | 0.72 | -1.39 | -0.47 | 3.74E-04 | -7.17E+01 | 7.17E+01 |
| ENSG00000100462 | PRMT5          | 0.76 | -1.31 | -0.39 | 3.37E-04 | -7.17E+01 | 7.17E+01 |
| ENSG00000268516 | CTD-3138B18.5  | 0.60 | -1.67 | -0.74 | 5.46E-04 | -7.16E+01 | 7.16E+01 |
| ENSG00000182718 | ANXA2          | 1.33 | 1.33  | 0.41  | 3.44E-04 | 7.16E+01  | 7.16E+01 |
| ENSG00000118965 | WDR35          | 1.34 | 1.34  | 0.42  | 3.50E-04 | 7.15E+01  | 7.15E+01 |
| ENSG00000172954 | LCLAT1         | 1.34 | 1.34  | 0.43  | 3.54E-04 | 7.13E+01  | 7.13E+01 |
| ENSG00000198040 | ZNF84          | 1.36 | 1.36  | 0.45  | 3.66E-04 | 7.13E+01  | 7.13E+01 |
| ENSG00000204619 | PPP1R11        | 0.76 | -1.31 | -0.39 | 3.37E-04 | -7.12E+01 | 7.12E+01 |
| ENSG00000135211 | TMEM60         | 0.74 | -1.35 | -0.43 | 3.61E-04 | -7.11E+01 | 7.11E+01 |
| ENSG00000268912 | CTD-2619J13.17 | 1.66 | 1.66  | 0.73  | 5.48E-04 | 7.10E+01  | 7.10E+01 |
| ENSG00000197647 | ZNF433         | 0.63 | -1.59 | -0.67 | 5.05E-04 | -7.09E+01 | 7.09E+01 |
| ENSG00000121310 | ECHDC2         | 0.75 | -1.33 | -0.41 | 3.54E-04 | -7.05E+01 | 7.05E+01 |
| ENSG00000196267 | ZNF836         | 1.42 | 1.42  | 0.50  | 4.04E-04 | 7.05E+01  | 7.05E+01 |
| ENSG00000102452 | NALCN          | 0.73 | -1.36 | -0.45 | 3.77E-04 | -7.03E+01 | 7.03E+01 |
| ENSG00000186314 | PRELID2        | 0.74 | -1.35 | -0.43 | 3.69E-04 | -7.03E+01 | 7.03E+01 |
| ENSG00000101003 | GINS1          | 0.74 | -1.35 | -0.43 | 3.68E-04 | -7.02E+01 | 7.02E+01 |
| ENSG00000139343 | SNRPF          | 0.75 | -1.34 | -0.42 | 3.65E-04 | -7.01E+01 | 7.01E+01 |
| ENSG00000253352 | TUG1           | 1.34 | 1.34  | 0.42  | 3.63E-04 | 7.01E+01  | 7.01E+01 |
| ENSG00000102796 | RP11-473M20.14 | 1.44 | 1.44  | 0.53  | 4.23E-04 | 7.01E+01  | 7.01E+01 |
| ENSG00000128805 | DHRS12         | 1.48 | 1.48  | 0.56  | 4.45E-04 | 7.01E+01  | 7.01E+01 |
| ENSG00000177889 | ARHGAP22       | 1.31 | 1.31  | 0.39  | 3.51E-04 | 6.99E+01  | 6.99E+01 |
| ENSG00000140521 | UBE2N          | 0.76 | -1.32 | -0.40 | 3.58E-04 | -6.98E+01 | 6.98E+01 |
| ENSG00000167733 | POLG           | 0.75 | -1.33 | -0.41 | 3.64E-04 | -6.96E+01 | 6.96E+01 |
| ENSG00000254685 | HSD11B1L       | 0.61 | -1.63 | -0.70 | 5.47E-04 | -6.95E+01 | 6.95E+01 |
| ENSG00000197324 | FPGT           | 1.39 | 1.39  | 0.48  | 4.04E-04 | 6.94E+01  | 6.94E+01 |
| ENSG00000115211 | LRP10          | 1.39 | 1.39  | 0.48  | 4.05E-04 | 6.93E+01  | 6.93E+01 |
| ENSG00000247287 | EIF2B4         | 0.77 | -1.30 | -0.38 | 3.54E-04 | -6.92E+01 | 6.92E+01 |
| ENSG00000147050 | RP11-902B17.1  | 1.45 | 1.45  | 0.54  | 4.44E-04 | 6.90E+01  | 6.90E+01 |
| ENSG00000103145 | KDM6A          | 1.31 | 1.31  | 0.39  | 3.58E-04 | 6.90E+01  | 6.90E+01 |
| ENSG00000100319 | HCFC1R1        | 0.74 | -1.36 | -0.44 | 3.90E-04 | -6.89E+01 | 6.89E+01 |
| ENSG00000100307 | ZMAT5          | 1.35 | 1.35  | 0.43  | 3.82E-04 | 6.89E+01  | 6.89E+01 |
| ENSG00000187741 | CBX7           | 0.59 | -1.70 | -0.76 | 6.08E-04 | -6.88E+01 | 6.88E+01 |
| ENSG00000154803 | FANCA          | 0.74 | -1.35 | -0.44 | 3.90E-04 | -6.86E+01 | 6.86E+01 |
| ENSG00000172366 | FLCN           | 1.30 | 1.30  | 0.38  | 3.60E-04 | 6.85E+01  | 6.85E+01 |
| ENSG00000090612 | FAM195A        | 0.74 | -1.35 | -0.43 | 3.87E-04 | -6.85E+01 | 6.85E+01 |
| ENSG00000179526 | ZNF268         | 1.63 | 1.63  | 0.70  | 5.64E-04 | 6.84E+01  | 6.84E+01 |
| ENSG00000127720 | SHARPIN        | 0.75 | -1.33 | -0.41 | 3.78E-04 | -6.84E+01 | 6.84E+01 |
| ENSG00000059588 | METTL25        | 0.73 | -1.38 | -0.46 | 4.06E-04 | -6.83E+01 | 6.83E+01 |
| ENSG00000040487 | TARBP1         | 0.77 | -1.31 | -0.38 | 3.66E-04 | -6.83E+01 | 6.83E+01 |
| ENSG00000129911 | PQLC2          | 1.38 | 1.38  | 0.46  | 4.08E-04 | 6.82E+01  | 6.82E+01 |
| ENSG00000114904 | KLF16          | 1.33 | 1.33  | 0.41  | 3.83E-04 | 6.81E+01  | 6.81E+01 |
| ENSG00000153046 | NEK4           | 1.33 | 1.33  | 0.41  | 3.83E-04 | 6.79E+01  | 6.79E+01 |
| ENSG00000156515 | CDYL           | 1.32 | 1.32  | 0.41  | 3.83E-04 | 6.77E+01  | 6.77E+01 |
| ENSG00000143891 | HK1            | 1.39 | 1.39  | 0.48  | 4.24E-04 | 6.75E+01  | 6.75E+01 |
| ENSG00000122034 | GALM           | 0.74 | -1.36 | -0.44 | 4.05E-04 | -6.74E+01 | 6.74E+01 |
| ENSG00000145293 | GTF3A          | 1.32 | 1.32  | 0.40  | 3.86E-04 | 6.74E+01  | 6.74E+01 |
| ENSG00000160679 | ENOPH1         | 0.76 | -1.32 | -0.40 | 3.82E-04 | -6.73E+01 | 6.73E+01 |
| ENSG00000215305 | CHTOP          | 0.75 | -1.34 | -0.42 | 3.96E-04 | -6.71E+01 | 6.71E+01 |
| ENSG00000197363 | VPS16          | 0.77 | -1.30 | -0.38 | 3.77E-04 | -6.71E+01 | 6.71E+01 |
| ENSG00000162433 | ZNF517         | 1.52 | 1.52  | 0.60  | 5.16E-04 | 6.69E+01  | 6.69E+01 |
| ENSG00000138614 | AK4            | 0.74 | -1.35 | -0.43 | 4.05E-04 | -6.68E+01 | 6.68E+01 |
| ENSG00000196655 | VWA9           | 0.76 | -1.31 | -0.39 | 3.84E-04 | -6.68E+01 | 6.68E+01 |
| ENSG00000157483 | TRAPPC4        | 0.76 | -1.32 | -0.40 | 3.92E-04 | -6.68E+01 | 6.68E+01 |
| ENSG00000123240 | MYO1E          | 1.32 | 1.32  | 0.40  | 3.92E-04 | 6.68E+01  | 6.68E+01 |
| ENSG00000211450 | OPTN           | 1.32 | 1.32  | 0.40  | 3.92E-04 | 6.67E+01  | 6.67E+01 |
| ENSG00000181031 | C11orf31       | 0.75 | -1.33 | -0.41 | 3.98E-04 | -6.67E+01 | 6.67E+01 |
| ENSG00000100147 | RPH3AL         | 0.69 | -1.46 | -0.54 | 4.78E-04 | -6.66E+01 | 6.66E+01 |
| ENSG00000118257 | CCDC134        | 0.70 | -1.44 | -0.52 | 4.67E-04 | -6.65E+01 | 6.65E+01 |
| ENSG00000165233 | NRP2           | 1.38 | 1.38  | 0.47  | 4.33E-04 | 6.64E+01  | 6.64E+01 |
| ENSG00000234072 | C9orf89        | 1.32 | 1.32  | 0.40  | 3.95E-04 | 6.64E+01  | 6.64E+01 |
| ENSG00000213853 | AC074117.10    | 1.49 | 1.49  | 0.57  | 5.01E-04 | 6.63E+01  | 6.63E+01 |
| ENSG00000135535 | CETN3          | 1.34 | 1.34  | 0.42  | 4.10E-04 | 6.61E+01  | 6.61E+01 |
| ENSG00000069956 | EMP2           | 0.77 | -1.30 | -0.38 | 3.91E-04 | -6.60E+01 | 6.60E+01 |
| ENSG00000154122 | CD164          | 1.37 | 1.37  | 0.45  | 4.33E-04 | 6.59E+01  | 6.59E+01 |
| ENSG00000143702 | MAPK6          | 1.49 | 1.49  | 0.58  | 5.14E-04 | 6.58E+01  | 6.58E+01 |
| ENSG00000198538 | ANKH           | 1.32 | 1.32  | 0.40  | 4.02E-04 | 6.57E+01  | 6.57E+01 |
| ENSG00000119811 | CEP170         | 1.51 | 1.51  | 0.60  | 5.35E-04 | 6.55E+01  | 6.55E+01 |
| ENSG00000087269 | ZNF28          | 1.42 | 1.42  | 0.51  | 4.75E-04 | 6.53E+01  | 6.53E+01 |
| ENSG00000087269 | ULBP1          | 1.44 | 1.44  | 0.52  | 4.86E-04 | 6.53E+01  | 6.53E+01 |
| ENSG00000087269 | NOP14          | 0.75 | -1.33 | -0.41 | 4.16E-04 | -6.50E+01 | 6.50E+01 |

|                 |                 |      |       |       |          |           |          |
|-----------------|-----------------|------|-------|-------|----------|-----------|----------|
| ENSG00000088832 | FKBP1A          | 1.34 | 1.34  | 0.42  | 4.23E-04 | 6.49E+01  | 6.49E+01 |
| ENSG00000100364 | KIAA0930        | 1.31 | 1.31  | 0.39  | 4.09E-04 | 6.47E+01  | 6.47E+01 |
| ENSG00000197461 | PDGFA           | 1.30 | 1.30  | 0.38  | 4.08E-04 | 6.46E+01  | 6.46E+01 |
| ENSG00000121895 | TMEM156         | 1.47 | 1.47  | 0.56  | 5.21E-04 | 6.45E+01  | 6.45E+01 |
| ENSG00000139083 | ETV6            | 1.31 | 1.31  | 0.39  | 4.13E-04 | 6.45E+01  | 6.45E+01 |
| ENSG00000128294 | TPST2           | 1.30 | 1.30  | 0.38  | 4.10E-04 | 6.44E+01  | 6.44E+01 |
| ENSG00000119705 | SLIRP           | 0.74 | -1.35 | -0.43 | 4.39E-04 | -6.44E+01 | 6.44E+01 |
| ENSG00000165240 | ATP7A           | 0.77 | -1.31 | -0.38 | 4.12E-04 | -6.44E+01 | 6.44E+01 |
| ENSG00000223768 | LINC00205       | 1.36 | 1.36  | 0.44  | 4.47E-04 | 6.43E+01  | 6.43E+01 |
| ENSG00000122863 | CHST3           | 1.31 | 1.31  | 0.39  | 4.14E-04 | 6.42E+01  | 6.42E+01 |
| ENSG00000171425 | ZNF581          | 0.73 | -1.37 | -0.45 | 4.55E-04 | -6.42E+01 | 6.42E+01 |
| ENSG00000084734 | GCKR            | 0.65 | -1.54 | -0.62 | 5.76E-04 | -6.40E+01 | 6.40E+01 |
| ENSG00000214013 | GANC            | 1.32 | 1.32  | 0.40  | 4.25E-04 | 6.40E+01  | 6.40E+01 |
| ENSG00000196549 | MME             | 1.40 | 1.40  | 0.49  | 4.82E-04 | 6.39E+01  | 6.39E+01 |
| ENSG00000145494 | NDUFS6          | 0.75 | -1.33 | -0.41 | 4.37E-04 | -6.38E+01 | 6.38E+01 |
| ENSG00000105983 | LMBR1           | 1.34 | 1.34  | 0.42  | 4.41E-04 | 6.37E+01  | 6.37E+01 |
| ENSG00000167470 | MIDN            | 1.37 | 1.37  | 0.46  | 4.63E-04 | 6.37E+01  | 6.37E+01 |
| ENSG00000198429 | ZNF69           | 1.52 | 1.52  | 0.60  | 5.68E-04 | 6.36E+01  | 6.36E+01 |
| ENSG00000249614 | RP11-703G6.1    | 1.90 | 1.90  | 0.93  | 8.94E-04 | 6.35E+01  | 6.35E+01 |
| ENSG00000168411 | RFWD3           | 0.76 | -1.31 | -0.39 | 4.28E-04 | -6.34E+01 | 6.34E+01 |
| ENSG00000160049 | DFFA            | 0.76 | -1.32 | -0.40 | 4.33E-04 | -6.32E+01 | 6.32E+01 |
| ENSG00000150433 | TMEM218         | 0.76 | -1.31 | -0.39 | 4.33E-04 | -6.32E+01 | 6.32E+01 |
| ENSG00000198464 | ZNF480          | 1.34 | 1.34  | 0.43  | 4.54E-04 | 6.30E+01  | 6.30E+01 |
| ENSG00000168389 | MFSD2A          | 0.68 | -1.47 | -0.55 | 5.44E-04 | -6.30E+01 | 6.30E+01 |
| ENSG00000196437 | ZNF569          | 1.45 | 1.45  | 0.54  | 5.31E-04 | 6.29E+01  | 6.29E+01 |
| ENSG00000166275 | C10orf32        | 0.74 | -1.34 | -0.43 | 4.57E-04 | -6.28E+01 | 6.28E+01 |
| ENSG00000107819 | SFXN3           | 1.31 | 1.31  | 0.39  | 4.33E-04 | 6.28E+01  | 6.28E+01 |
| ENSG00000162599 | NFIA            | 0.77 | -1.30 | -0.38 | 4.30E-04 | -6.28E+01 | 6.28E+01 |
| ENSG00000149557 | FEZ1            | 1.31 | 1.31  | 0.39  | 4.37E-04 | 6.26E+01  | 6.26E+01 |
| ENSG00000205084 | TMEM231         | 0.73 | -1.38 | -0.46 | 4.87E-04 | -6.25E+01 | 6.25E+01 |
| ENSG00000164182 | NDUFAF2         | 0.77 | -1.30 | -0.38 | 4.35E-04 | -6.24E+01 | 6.24E+01 |
| ENSG00000156787 | WDR67           | 0.74 | -1.36 | -0.44 | 4.73E-04 | -6.24E+01 | 6.24E+01 |
| ENSG00000157349 | DDX19B          | 0.77 | -1.31 | -0.38 | 4.40E-04 | -6.22E+01 | 6.22E+01 |
| ENSG00000124541 | RRP36           | 0.76 | -1.32 | -0.40 | 4.49E-04 | -6.21E+01 | 6.21E+01 |
| ENSG00000100084 | HIRA            | 1.36 | 1.36  | 0.44  | 4.79E-04 | 6.20E+01  | 6.20E+01 |
| ENSG00000111906 | HDDC2           | 1.33 | 1.33  | 0.41  | 4.63E-04 | 6.19E+01  | 6.19E+01 |
| ENSG00000160094 | ZNF362          | 1.41 | 1.41  | 0.49  | 5.19E-04 | 6.19E+01  | 6.19E+01 |
| ENSG00000100568 | VTI1B           | 0.77 | -1.31 | -0.38 | 4.46E-04 | -6.18E+01 | 6.18E+01 |
| ENSG00000186104 | CYP2R1          | 1.31 | 1.31  | 0.39  | 4.50E-04 | 6.16E+01  | 6.16E+01 |
| ENSG00000162923 | WDR26           | 1.32 | 1.32  | 0.40  | 4.58E-04 | 6.16E+01  | 6.16E+01 |
|                 | XXyac-YRM2039.2 | 1.61 | 1.61  | 0.69  | 6.83E-04 | 6.16E+01  | 6.16E+01 |
| ENSG00000006712 | PAF1            | 0.76 | -1.31 | -0.39 | 4.55E-04 | -6.15E+01 | 6.15E+01 |
| ENSG00000267350 | RP1-178F10.3    | 1.30 | 1.30  | 0.38  | 4.48E-04 | 6.14E+01  | 6.14E+01 |
| ENSG00000153310 | FAM49B          | 1.31 | 1.31  | 0.39  | 4.53E-04 | 6.14E+01  | 6.14E+01 |
| ENSG00000149923 | PPP4C           | 0.76 | -1.32 | -0.40 | 4.64E-04 | -6.12E+01 | 6.12E+01 |
| ENSG00000105063 | PPP6R1          | 1.33 | 1.33  | 0.41  | 4.69E-04 | 6.12E+01  | 6.12E+01 |
| ENSG00000115526 | CHST10          | 0.77 | -1.31 | -0.38 | 4.57E-04 | -6.11E+01 | 6.11E+01 |
| ENSG00000123200 | ZC3H13          | 1.43 | 1.43  | 0.52  | 5.50E-04 | 6.11E+01  | 6.11E+01 |
| ENSG00000173960 | UBXN2A          | 1.30 | 1.30  | 0.38  | 4.58E-04 | 6.09E+01  | 6.09E+01 |
| ENSG00000058804 | TMEM48          | 0.76 | -1.31 | -0.39 | 4.67E-04 | -6.08E+01 | 6.08E+01 |
| ENSG00000204177 | BMS1P1          | 0.71 | -1.41 | -0.50 | 5.37E-04 | -6.08E+01 | 6.08E+01 |
| ENSG00000165417 | GTF2A1          | 1.32 | 1.32  | 0.40  | 4.74E-04 | 6.08E+01  | 6.08E+01 |
| ENSG00000127252 | HRASLS          | 0.63 | -1.60 | -0.68 | 6.93E-04 | -6.07E+01 | 6.07E+01 |
| ENSG00000167110 | GOLGA2          | 1.30 | 1.30  | 0.38  | 4.58E-04 | 6.07E+01  | 6.07E+01 |
| ENSG00000180611 | MB21D2          | 1.31 | 1.31  | 0.39  | 4.65E-04 | 6.07E+01  | 6.07E+01 |
| ENSG00000141655 | TNFRSF11A       | 0.71 | -1.40 | -0.49 | 5.35E-04 | -6.06E+01 | 6.06E+01 |
| ENSG00000135457 | TFCP2           | 0.75 | -1.34 | -0.42 | 4.89E-04 | -6.05E+01 | 6.05E+01 |
| ENSG00000235109 | ZNF323          | 1.31 | 1.31  | 0.39  | 4.71E-04 | 6.05E+01  | 6.05E+01 |
| ENSG00000151470 | C4orf33         | 1.42 | 1.42  | 0.50  | 5.48E-04 | 6.05E+01  | 6.05E+01 |
| ENSG00000064932 | SBNO2           | 1.35 | 1.35  | 0.43  | 4.99E-04 | 6.03E+01  | 6.03E+01 |
| ENSG00000100348 | TXN2            | 0.71 | -1.41 | -0.49 | 5.44E-04 | -6.03E+01 | 6.03E+01 |
| ENSG00000163249 | CCNYL1          | 0.68 | -1.47 | -0.56 | 5.95E-04 | -6.03E+01 | 6.03E+01 |
| ENSG00000102359 | SRPX2           | 1.32 | 1.32  | 0.40  | 4.80E-04 | 6.02E+01  | 6.02E+01 |
| ENSG00000215417 | MIR17HG         | 0.73 | -1.37 | -0.45 | 5.15E-04 | -6.02E+01 | 6.02E+01 |
| ENSG00000248866 | USP46-AS1       | 0.60 | -1.66 | -0.73 | 7.66E-04 | -6.01E+01 | 6.01E+01 |
| ENSG00000170906 | NDUFA3          | 0.76 | -1.32 | -0.40 | 4.85E-04 | -6.00E+01 | 6.00E+01 |
| ENSG00000171940 | ZNF217          | 1.30 | 1.30  | 0.38  | 4.69E-04 | 6.00E+01  | 6.00E+01 |
| ENSG00000085563 | ABCB1           | 0.65 | -1.53 | -0.62 | 6.52E-04 | -6.00E+01 | 6.00E+01 |
| ENSG00000038532 | CLEC16A         | 1.30 | 1.30  | 0.37  | 4.69E-04 | 5.99E+01  | 5.99E+01 |
| ENSG00000102978 | POLR2C          | 0.76 | -1.32 | -0.40 | 4.84E-04 | -5.98E+01 | 5.98E+01 |
| ENSG00000214960 | ISPD            | 0.61 | -1.65 | -0.72 | 7.67E-04 | -5.96E+01 | 5.96E+01 |
| ENSG00000141564 | RPTOR           | 1.41 | 1.41  | 0.50  | 5.62E-04 | 5.96E+01  | 5.96E+01 |
| ENSG00000068024 | HDAC4           | 1.33 | 1.33  | 0.42  | 5.02E-04 | 5.96E+01  | 5.96E+01 |
|                 | RP11-2711.2     | 0.75 | -1.33 | -0.41 | 4.99E-04 | -5.95E+01 | 5.95E+01 |
| ENSG00000189319 | FAM53B          | 1.29 | 1.29  | 0.37  | 4.69E-04 | 5.95E+01  | 5.95E+01 |
| ENSG00000106608 | URGCP           | 1.30 | 1.30  | 0.38  | 4.79E-04 | 5.94E+01  | 5.94E+01 |
| ENSG00000169851 | PCDH7           | 0.76 | -1.31 | -0.39 | 4.86E-04 | -5.94E+01 | 5.94E+01 |
| ENSG00000185252 | ZNF74           | 1.30 | 1.30  | 0.38  | 4.81E-04 | 5.94E+01  | 5.94E+01 |
| ENSG00000132003 | ZSWIM4          | 1.37 | 1.37  | 0.46  | 5.38E-04 | 5.92E+01  | 5.92E+01 |

|                 |               |      |       |       |          |           |          |
|-----------------|---------------|------|-------|-------|----------|-----------|----------|
| ENSG00000148655 | C10orf11      | 0.70 | -1.43 | -0.52 | 5.93E-04 | -5.89E+01 | 5.89E+01 |
| ENSG00000069667 | RORA          | 1.45 | 1.45  | 0.54  | 6.08E-04 | 5.89E+01  | 5.89E+01 |
| ENSG00000145220 | LYAR          | 0.77 | -1.30 | -0.38 | 4.89E-04 | -5.89E+01 | 5.89E+01 |
| ENSG00000182247 | UBE2E2        | 0.76 | -1.32 | -0.40 | 5.05E-04 | -5.86E+01 | 5.86E+01 |
| ENSG00000107643 | MAPK8         | 0.77 | -1.30 | -0.38 | 4.96E-04 | -5.86E+01 | 5.86E+01 |
| ENSG00000182871 | COL18A1       | 1.44 | 1.44  | 0.52  | 6.03E-04 | 5.85E+01  | 5.85E+01 |
| ENSG00000168653 | NDUFS5        | 0.74 | -1.35 | -0.44 | 5.35E-04 | -5.84E+01 | 5.84E+01 |
| ENSG00000145725 | PPIP5K2       | 1.46 | 1.46  | 0.54  | 6.23E-04 | 5.84E+01  | 5.84E+01 |
| ENSG00000185989 | RASA3         | 1.32 | 1.32  | 0.40  | 5.10E-04 | 5.83E+01  | 5.83E+01 |
| ENSG00000175220 | ARHGAP1       | 1.35 | 1.35  | 0.43  | 5.37E-04 | 5.81E+01  | 5.81E+01 |
| ENSG00000187266 | EPOR          | 1.42 | 1.42  | 0.51  | 6.01E-04 | 5.80E+01  | 5.80E+01 |
|                 | RP11-117P22.1 | 1.31 | 1.31  | 0.39  | 5.15E-04 | 5.77E+01  | 5.77E+01 |
| ENSG00000103599 | IQCH          | 1.60 | 1.60  | 0.68  | 7.69E-04 | 5.76E+01  | 5.76E+01 |
| ENSG00000085276 | MECOM         | 1.37 | 1.37  | 0.45  | 5.66E-04 | 5.76E+01  | 5.76E+01 |
| ENSG00000213967 | ZNF726        | 0.68 | -1.46 | -0.55 | 6.48E-04 | -5.75E+01 | 5.75E+01 |
| ENSG00000067082 | KLF6          | 1.37 | 1.37  | 0.46  | 5.71E-04 | 5.75E+01  | 5.75E+01 |
| ENSG00000115183 | TANC1         | 1.37 | 1.37  | 0.45  | 5.68E-04 | 5.75E+01  | 5.75E+01 |
| ENSG00000006118 | TMEM132A      | 1.31 | 1.31  | 0.39  | 5.18E-04 | 5.74E+01  | 5.74E+01 |
| ENSG00000008256 | CYTH3         | 1.33 | 1.33  | 0.41  | 5.38E-04 | 5.73E+01  | 5.73E+01 |
| ENSG00000173207 | CKS1B         | 0.77 | -1.30 | -0.38 | 5.18E-04 | -5.71E+01 | 5.71E+01 |
| ENSG00000071553 | ATP6AP1       | 1.31 | 1.31  | 0.38  | 5.22E-04 | 5.71E+01  | 5.71E+01 |
| ENSG00000185920 | PTCH1         | 0.68 | -1.48 | -0.57 | 6.75E-04 | -5.69E+01 | 5.69E+01 |
| ENSG00000171792 | RHNO1         | 0.76 | -1.31 | -0.39 | 5.33E-04 | -5.68E+01 | 5.68E+01 |
| ENSG00000126457 | PRMT1         | 0.76 | -1.32 | -0.40 | 5.46E-04 | -5.66E+01 | 5.66E+01 |
| ENSG00000160131 | VMA21         | 0.76 | -1.32 | -0.40 | 5.45E-04 | -5.65E+01 | 5.65E+01 |
| ENSG00000118181 | RPS25         | 0.72 | -1.38 | -0.47 | 6.00E-04 | -5.64E+01 | 5.64E+01 |
| ENSG00000134255 | CEPT1         | 0.77 | -1.31 | -0.38 | 5.36E-04 | -5.64E+01 | 5.64E+01 |
| ENSG00000166377 | ATP9B         | 0.77 | -1.30 | -0.38 | 5.31E-04 | -5.63E+01 | 5.63E+01 |
| ENSG00000214654 | RP11-2711.4   | 1.61 | 1.61  | 0.69  | 8.16E-04 | 5.63E+01  | 5.63E+01 |
| ENSG00000180884 | ZNF792        | 1.30 | 1.30  | 0.37  | 5.30E-04 | 5.63E+01  | 5.63E+01 |
| ENSG00000135338 | LCA5          | 1.46 | 1.46  | 0.55  | 6.78E-04 | 5.62E+01  | 5.62E+01 |
| ENSG00000222365 | SNORD12B      | 0.58 | -1.72 | -0.78 | 9.38E-04 | -5.60E+01 | 5.60E+01 |
| ENSG00000134758 | RNF138        | 0.77 | -1.29 | -0.37 | 5.36E-04 | -5.59E+01 | 5.59E+01 |
| ENSG00000177954 | RPS27         | 0.73 | -1.36 | -0.45 | 5.99E-04 | -5.57E+01 | 5.57E+01 |
| ENSG00000154814 | OXNAD1        | 0.76 | -1.31 | -0.39 | 5.55E-04 | -5.57E+01 | 5.57E+01 |
| ENSG00000172244 | C5orf34       | 0.72 | -1.39 | -0.47 | 6.21E-04 | -5.56E+01 | 5.56E+01 |
| ENSG00000177888 | ZBTB41        | 1.54 | 1.54  | 0.62  | 7.69E-04 | 5.56E+01  | 5.56E+01 |
| ENSG00000189266 | PNRC2         | 0.76 | -1.31 | -0.39 | 5.58E-04 | -5.54E+01 | 5.54E+01 |
| ENSG00000175061 | C17orf76-AS1  | 0.76 | -1.32 | -0.40 | 5.66E-04 | -5.53E+01 | 5.53E+01 |
| ENSG00000243811 | APOBEC3D      | 1.67 | 1.67  | 0.74  | 9.15E-04 | 5.53E+01  | 5.53E+01 |
| ENSG00000112992 | NNT           | 0.76 | -1.31 | -0.39 | 5.59E-04 | -5.53E+01 | 5.53E+01 |
| ENSG00000233757 | AC092835.2    | 1.46 | 1.46  | 0.55  | 7.00E-04 | 5.52E+01  | 5.52E+01 |
| ENSG00000066651 | TRMT11        | 0.73 | -1.37 | -0.46 | 6.18E-04 | -5.52E+01 | 5.52E+01 |
| ENSG00000108465 | CDK5RAP3      | 0.78 | -1.29 | -0.36 | 5.48E-04 | -5.50E+01 | 5.50E+01 |
| ENSG00000112514 | CUTA          | 0.77 | -1.30 | -0.37 | 5.57E-04 | -5.49E+01 | 5.49E+01 |
| ENSG00000165115 | KIF27         | 1.52 | 1.52  | 0.60  | 7.63E-04 | 5.49E+01  | 5.49E+01 |
| ENSG00000163138 | PACRGL        | 0.77 | -1.31 | -0.39 | 5.68E-04 | -5.48E+01 | 5.48E+01 |
| ENSG00000151292 | CSNK1G3       | 1.31 | 1.31  | 0.39  | 5.73E-04 | 5.48E+01  | 5.48E+01 |
| ENSG00000075240 | GRAMD4        | 1.34 | 1.34  | 0.42  | 5.96E-04 | 5.48E+01  | 5.48E+01 |
| ENSG00000131475 | VPS25         | 1.32 | 1.32  | 0.40  | 5.82E-04 | 5.45E+01  | 5.45E+01 |
| ENSG00000023909 | GCLM          | 0.75 | -1.33 | -0.41 | 5.97E-04 | -5.45E+01 | 5.45E+01 |
| ENSG00000167081 | PBX3          | 1.30 | 1.30  | 0.38  | 5.72E-04 | 5.43E+01  | 5.43E+01 |
| ENSG00000140396 | NCOA2         | 1.29 | 1.29  | 0.36  | 5.61E-04 | 5.43E+01  | 5.43E+01 |
| ENSG00000213693 | SEC14L1P1     | 1.61 | 1.61  | 0.68  | 8.81E-04 | 5.42E+01  | 5.42E+01 |
| ENSG00000160959 | LRRC14        | 0.77 | -1.30 | -0.38 | 5.79E-04 | -5.41E+01 | 5.41E+01 |
| ENSG00000123643 | SLC36A1       | 1.35 | 1.35  | 0.44  | 6.25E-04 | 5.41E+01  | 5.41E+01 |
| ENSG00000177463 | NR2C2         | 1.34 | 1.34  | 0.42  | 6.09E-04 | 5.41E+01  | 5.41E+01 |
| ENSG00000143420 | ENSA          | 0.76 | -1.31 | -0.39 | 5.86E-04 | -5.41E+01 | 5.41E+01 |
| ENSG00000104131 | EIF3J         | 0.75 | -1.34 | -0.42 | 6.15E-04 | -5.40E+01 | 5.40E+01 |
| ENSG00000126464 | PRR12         | 1.40 | 1.40  | 0.49  | 6.79E-04 | 5.37E+01  | 5.37E+01 |
| ENSG00000103047 | TMCO7         | 0.75 | -1.33 | -0.41 | 6.11E-04 | -5.37E+01 | 5.37E+01 |
| ENSG00000166532 | RIMKLB        | 0.76 | -1.31 | -0.39 | 6.01E-04 | -5.35E+01 | 5.35E+01 |
| ENSG00000172878 | METAP1D       | 0.72 | -1.39 | -0.47 | 6.72E-04 | -5.34E+01 | 5.34E+01 |
| ENSG00000105011 | ASF1B         | 0.75 | -1.34 | -0.42 | 6.27E-04 | -5.34E+01 | 5.34E+01 |
| ENSG00000151148 | UBE3B         | 1.33 | 1.33  | 0.41  | 6.23E-04 | 5.33E+01  | 5.33E+01 |
| ENSG00000141956 | PRDM15        | 1.34 | 1.34  | 0.42  | 6.34E-04 | 5.33E+01  | 5.33E+01 |
| ENSG00000198924 | DCLRE1A       | 1.38 | 1.38  | 0.47  | 6.72E-04 | 5.33E+01  | 5.33E+01 |
| ENSG00000132326 | PER2          | 0.65 | -1.53 | -0.61 | 8.26E-04 | -5.32E+01 | 5.32E+01 |
| ENSG00000121864 | ZNF639        | 0.78 | -1.29 | -0.37 | 5.86E-04 | -5.32E+01 | 5.32E+01 |
| ENSG00000139436 | GIT2          | 1.30 | 1.30  | 0.38  | 5.94E-04 | 5.32E+01  | 5.32E+01 |
| ENSG00000257103 | LSM14A        | 0.76 | -1.32 | -0.40 | 6.17E-04 | -5.32E+01 | 5.32E+01 |
| ENSG00000152642 | GPD1L         | 0.78 | -1.29 | -0.37 | 5.89E-04 | -5.31E+01 | 5.31E+01 |
| ENSG00000136478 | TEX2          | 0.76 | -1.31 | -0.39 | 6.10E-04 | -5.31E+01 | 5.31E+01 |
| ENSG00000141458 | NPC1          | 1.31 | 1.31  | 0.39  | 6.09E-04 | 5.30E+01  | 5.30E+01 |
| ENSG00000123728 | RAP2C         | 0.76 | -1.32 | -0.40 | 6.22E-04 | -5.29E+01 | 5.29E+01 |
| ENSG00000050130 | JKAMP         | 1.31 | 1.31  | 0.39  | 6.14E-04 | 5.29E+01  | 5.29E+01 |
| ENSG00000134899 | ERCC5         | 1.30 | 1.30  | 0.38  | 6.09E-04 | 5.29E+01  | 5.29E+01 |
| ENSG00000144674 | GOLGA4        | 1.39 | 1.39  | 0.47  | 6.94E-04 | 5.28E+01  | 5.28E+01 |
| ENSG00000205765 | C5orf51       | 1.30 | 1.30  | 0.38  | 6.07E-04 | 5.27E+01  | 5.27E+01 |

|                 |             |      |       |       |          |           |          |
|-----------------|-------------|------|-------|-------|----------|-----------|----------|
| ENSG00000160124 | CCDC58      | 0.76 | -1.32 | -0.40 | 6.27E-04 | -5.27E+01 | 5.27E+01 |
| ENSG00000275126 | HIST1H4L    | 0.74 | -1.34 | -0.43 | 6.50E-04 | -5.27E+01 | 5.27E+01 |
| ENSG00000163684 | RPP14       | 0.78 | -1.29 | -0.36 | 5.97E-04 | -5.27E+01 | 5.27E+01 |
| ENSG00000167965 | MLST8       | 0.65 | -1.54 | -0.62 | 8.60E-04 | -5.25E+01 | 5.25E+01 |
| ENSG00000143499 | SMYD2       | 0.78 | -1.29 | -0.36 | 6.00E-04 | -5.25E+01 | 5.25E+01 |
| ENSG00000196141 | SPATS2L     | 1.32 | 1.32  | 0.40  | 6.30E-04 | 5.25E+01  | 5.25E+01 |
| ENSG00000107829 | FBXW4       | 1.35 | 1.35  | 0.43  | 6.64E-04 | 5.24E+01  | 5.24E+01 |
| ENSG00000171861 | RNMTL1      | 0.77 | -1.30 | -0.38 | 6.16E-04 | -5.23E+01 | 5.23E+01 |
| ENSG00000092098 | RNF31       | 0.76 | -1.32 | -0.40 | 6.34E-04 | -5.23E+01 | 5.23E+01 |
| ENSG00000120942 | UBIAD1      | 1.31 | 1.31  | 0.39  | 6.32E-04 | 5.22E+01  | 5.22E+01 |
| ENSG00000121957 | GPSM2       | 0.76 | -1.31 | -0.39 | 6.29E-04 | -5.22E+01 | 5.22E+01 |
| ENSG00000140945 | CDH13       | 1.32 | 1.32  | 0.40  | 6.45E-04 | 5.21E+01  | 5.21E+01 |
| ENSG00000181004 | BBS12       | 1.39 | 1.39  | 0.47  | 7.11E-04 | 5.21E+01  | 5.21E+01 |
|                 | AC004383.4  | 0.71 | -1.40 | -0.49 | 7.25E-04 | -5.21E+01 | 5.21E+01 |
| ENSG00000163681 | SLMAP       | 1.30 | 1.30  | 0.38  | 6.28E-04 | 5.19E+01  | 5.19E+01 |
| ENSG00000170222 | ADPRM       | 0.73 | -1.37 | -0.46 | 7.04E-04 | -5.18E+01 | 5.18E+01 |
| ENSG00000196550 | FAM72A      | 1.63 | 1.63  | 0.71  | 9.97E-04 | 5.17E+01  | 5.17E+01 |
| ENSG00000079691 | LRRC16A     | 1.30 | 1.30  | 0.38  | 6.30E-04 | 5.17E+01  | 5.17E+01 |
| ENSG00000183527 | PSMG1       | 0.77 | -1.31 | -0.39 | 6.42E-04 | -5.16E+01 | 5.16E+01 |
| ENSG00000138442 | WDR12       | 0.78 | -1.28 | -0.36 | 6.23E-04 | -5.14E+01 | 5.14E+01 |
| ENSG00000100266 | PACSLN2     | 0.76 | -1.32 | -0.40 | 6.64E-04 | -5.14E+01 | 5.14E+01 |
| ENSG00000197622 | CDC42SE1    | 1.31 | 1.31  | 0.39  | 6.47E-04 | 5.13E+01  | 5.13E+01 |
| ENSG00000233404 | FLJ20373    | 1.30 | 1.30  | 0.38  | 6.46E-04 | 5.12E+01  | 5.12E+01 |
| ENSG00000042088 | TDP1        | 0.77 | -1.30 | -0.38 | 6.48E-04 | -5.11E+01 | 5.11E+01 |
| ENSG00000102390 | CXorf26     | 0.73 | -1.37 | -0.45 | 7.21E-04 | -5.10E+01 | 5.10E+01 |
| ENSG00000169919 | GUSB        | 0.78 | -1.28 | -0.36 | 6.35E-04 | -5.09E+01 | 5.09E+01 |
| ENSG00000227057 | WDR46       | 0.77 | -1.29 | -0.37 | 6.44E-04 | -5.08E+01 | 5.08E+01 |
| ENSG00000141524 | TMC6        | 1.28 | 1.28  | 0.36  | 6.40E-04 | 5.07E+01  | 5.07E+01 |
| ENSG00000115738 | ID2         | 0.63 | -1.60 | -0.68 | 9.92E-04 | -5.07E+01 | 5.07E+01 |
| ENSG00000106366 | SERPINE1    | 1.35 | 1.35  | 0.43  | 7.04E-04 | 5.07E+01  | 5.07E+01 |
| ENSG00000068097 | HEATR6      | 0.75 | -1.33 | -0.41 | 6.84E-04 | -5.07E+01 | 5.07E+01 |
| ENSG00000175334 | BANF1       | 0.71 | -1.42 | -0.50 | 7.85E-04 | -5.06E+01 | 5.06E+01 |
| ENSG00000181458 | TMEM45A     | 1.34 | 1.34  | 0.43  | 7.05E-04 | 5.06E+01  | 5.06E+01 |
| ENSG00000231500 | RPS18       | 0.74 | -1.35 | -0.43 | 7.11E-04 | -5.05E+01 | 5.05E+01 |
| ENSG00000099940 | SNAP29      | 1.41 | 1.41  | 0.50  | 7.80E-04 | 5.05E+01  | 5.05E+01 |
| ENSG00000241404 | EGFL8       | 0.65 | -1.54 | -0.63 | 9.40E-04 | -5.04E+01 | 5.04E+01 |
| ENSG00000049618 | ARID1B      | 1.29 | 1.29  | 0.37  | 6.62E-04 | 5.03E+01  | 5.03E+01 |
| ENSG00000108861 | DUSP3       | 1.30 | 1.30  | 0.37  | 6.66E-04 | 5.02E+01  | 5.02E+01 |
| ENSG00000139636 | LMBR1L      | 1.32 | 1.32  | 0.40  | 6.93E-04 | 5.02E+01  | 5.02E+01 |
| ENSG00000137700 | SLC37A4     | 0.77 | -1.29 | -0.37 | 6.68E-04 | -5.01E+01 | 5.01E+01 |
| ENSG00000105968 | H2AFV       | 0.77 | -1.31 | -0.39 | 6.82E-04 | -5.00E+01 | 5.00E+01 |
| ENSG00000182993 | C12orf60    | 1.56 | 1.56  | 0.64  | 9.78E-04 | 5.00E+01  | 5.00E+01 |
| ENSG00000113070 | HBEGF       | 1.30 | 1.30  | 0.38  | 6.84E-04 | 4.99E+01  | 4.99E+01 |
| ENSG00000154133 | ROBO4       | 1.37 | 1.37  | 0.45  | 7.52E-04 | 4.99E+01  | 4.99E+01 |
| ENSG00000230551 | CTB-89H12.4 | 0.77 | -1.30 | -0.38 | 6.83E-04 | -4.98E+01 | 4.98E+01 |
| ENSG00000146833 | TRIM4       | 1.29 | 1.29  | 0.36  | 6.69E-04 | 4.97E+01  | 4.97E+01 |
| ENSG00000087494 | PTHLH       | 0.64 | -1.56 | -0.65 | 9.89E-04 | -4.97E+01 | 4.97E+01 |
| ENSG00000138190 | EXOC6       | 1.36 | 1.36  | 0.45  | 7.50E-04 | 4.97E+01  | 4.97E+01 |
| ENSG00000137404 | NRM         | 0.74 | -1.36 | -0.44 | 7.49E-04 | -4.97E+01 | 4.97E+01 |
| ENSG00000105404 | RABAC1      | 1.31 | 1.31  | 0.39  | 7.01E-04 | 4.96E+01  | 4.96E+01 |
| ENSG00000172216 | CEBPB       | 0.73 | -1.37 | -0.46 | 7.66E-04 | -4.96E+01 | 4.96E+01 |
| ENSG00000130635 | COL5A1      | 1.39 | 1.39  | 0.47  | 7.85E-04 | 4.95E+01  | 4.95E+01 |
| ENSG00000155846 | PPARGC1B    | 0.65 | -1.53 | -0.61 | 9.57E-04 | -4.94E+01 | 4.94E+01 |
| ENSG00000159840 | ZYX         | 1.44 | 1.44  | 0.53  | 8.48E-04 | 4.94E+01  | 4.94E+01 |
| ENSG00000067191 | CACNB1      | 0.67 | -1.50 | -0.59 | 9.27E-04 | -4.94E+01 | 4.94E+01 |
| ENSG00000106628 | POLD2       | 0.76 | -1.32 | -0.40 | 7.20E-04 | -4.93E+01 | 4.93E+01 |
| ENSG00000146414 | SHPRH       | 1.32 | 1.32  | 0.40  | 7.17E-04 | 4.93E+01  | 4.93E+01 |
| ENSG00000100554 | ATP6V1D     | 1.30 | 1.30  | 0.38  | 6.98E-04 | 4.91E+01  | 4.91E+01 |
| ENSG00000124784 | RIOK1       | 0.78 | -1.28 | -0.36 | 6.85E-04 | -4.90E+01 | 4.90E+01 |
| ENSG00000159403 | C1R         | 1.61 | 1.61  | 0.69  | 1.08E-03 | 4.90E+01  | 4.90E+01 |
| ENSG00000081181 | ARG2        | 1.29 | 1.29  | 0.37  | 6.94E-04 | 4.89E+01  | 4.89E+01 |
| ENSG00000171634 | BPTF        | 1.36 | 1.36  | 0.45  | 7.74E-04 | 4.89E+01  | 4.89E+01 |
| ENSG00000182199 | SHMT2       | 0.76 | -1.31 | -0.39 | 7.22E-04 | -4.88E+01 | 4.88E+01 |
| ENSG00000180228 | PRKRA       | 0.78 | -1.29 | -0.36 | 6.96E-04 | -4.88E+01 | 4.88E+01 |
| ENSG00000182700 | IGIP        | 1.86 | 1.86  | 0.90  | 1.46E-03 | 4.87E+01  | 4.87E+01 |
| ENSG00000131711 | MAP1B       | 1.33 | 1.33  | 0.41  | 7.51E-04 | 4.86E+01  | 4.86E+01 |
| ENSG00000253159 | PCDHGA12    | 1.56 | 1.56  | 0.64  | 1.03E-03 | 4.85E+01  | 4.85E+01 |
| ENSG00000182180 | MRPS16      | 0.77 | -1.30 | -0.38 | 7.17E-04 | -4.84E+01 | 4.84E+01 |
| ENSG00000130164 | LDLR        | 1.36 | 1.36  | 0.45  | 7.93E-04 | 4.84E+01  | 4.84E+01 |
| ENSG00000104853 | CLPTM1      | 1.46 | 1.46  | 0.55  | 9.14E-04 | 4.84E+01  | 4.84E+01 |
| ENSG00000198937 | CCDC167     | 0.75 | -1.34 | -0.42 | 7.69E-04 | -4.83E+01 | 4.83E+01 |
| ENSG00000120685 | PROSER1     | 1.30 | 1.30  | 0.38  | 7.28E-04 | 4.82E+01  | 4.82E+01 |
| ENSG00000186187 | ZNRF1       | 1.29 | 1.29  | 0.37  | 7.17E-04 | 4.82E+01  | 4.82E+01 |
| ENSG00000149577 | SIDT2       | 0.71 | -1.41 | -0.50 | 8.60E-04 | -4.82E+01 | 4.82E+01 |
| ENSG00000070371 | CLTCL1      | 0.75 | -1.34 | -0.42 | 7.78E-04 | -4.81E+01 | 4.81E+01 |
| ENSG00000197747 | S100A10     | 1.32 | 1.32  | 0.40  | 7.58E-04 | 4.80E+01  | 4.80E+01 |
| ENSG00000204622 | HLA-J       | 1.49 | 1.49  | 0.58  | 9.82E-04 | 4.77E+01  | 4.77E+01 |
| ENSG00000129480 | DTD2        | 0.77 | -1.29 | -0.37 | 7.35E-04 | -4.76E+01 | 4.76E+01 |
| ENSG00000245571 | AP001258.4  | 0.66 | -1.52 | -0.60 | 1.02E-03 | -4.76E+01 | 4.76E+01 |

|                 |               |      |       |       |          |           |          |
|-----------------|---------------|------|-------|-------|----------|-----------|----------|
| ENSG00000141556 | TBCD          | 1.29 | 1.29  | 0.37  | 7.32E-04 | 4.76E+01  | 4.76E+01 |
| ENSG00000168209 | DDIT4         | 1.29 | 1.29  | 0.37  | 7.34E-04 | 4.75E+01  | 4.75E+01 |
| ENSG00000187824 | TMEM220       | 0.68 | -1.48 | -0.56 | 9.68E-04 | -4.75E+01 | 4.75E+01 |
| ENSG00000116514 | RNF19B        | 1.30 | 1.30  | 0.37  | 7.43E-04 | 4.75E+01  | 4.75E+01 |
| ENSG00000133789 | SWAP70        | 1.32 | 1.32  | 0.40  | 7.68E-04 | 4.75E+01  | 4.75E+01 |
| ENSG00000073050 | XRCC1         | 0.77 | -1.30 | -0.38 | 7.52E-04 | -4.75E+01 | 4.75E+01 |
| ENSG00000132824 | SERINC3       | 1.31 | 1.31  | 0.39  | 7.62E-04 | 4.74E+01  | 4.74E+01 |
| ENSG00000151914 | DST           | 1.42 | 1.42  | 0.51  | 9.01E-04 | 4.74E+01  | 4.74E+01 |
| ENSG00000088298 | EDEM2         | 1.29 | 1.29  | 0.37  | 7.41E-04 | 4.73E+01  | 4.73E+01 |
| ENSG00000189079 | ARID2         | 1.33 | 1.33  | 0.41  | 7.90E-04 | 4.73E+01  | 4.73E+01 |
| ENSG00000184436 | THAP7         | 0.76 | -1.31 | -0.39 | 7.77E-04 | -4.72E+01 | 4.72E+01 |
| ENSG00000099290 | FAM21A        | 1.37 | 1.37  | 0.45  | 8.45E-04 | 4.70E+01  | 4.70E+01 |
| ENSG00000126216 | TUBGCP3       | 0.78 | -1.28 | -0.36 | 7.47E-04 | -4.70E+01 | 4.70E+01 |
| ENSG00000187607 | ZNF286A       | 1.28 | 1.28  | 0.36  | 7.46E-04 | 4.70E+01  | 4.70E+01 |
| ENSG00000176731 | C8orf59       | 0.75 | -1.34 | -0.42 | 8.21E-04 | -4.66E+01 | 4.66E+01 |
| ENSG00000166908 | PIP4K2C       | 1.33 | 1.33  | 0.42  | 8.20E-04 | 4.66E+01  | 4.66E+01 |
|                 | AC018633.4    | 1.67 | 1.67  | 0.74  | 1.28E-03 | 4.66E+01  | 4.66E+01 |
| ENSG00000122966 | CIT           | 0.77 | -1.30 | -0.38 | 7.84E-04 | -4.65E+01 | 4.65E+01 |
| ENSG00000100387 | RBX1          | 0.73 | -1.38 | -0.46 | 8.78E-04 | -4.65E+01 | 4.65E+01 |
| ENSG00000185163 | DDX51         | 0.77 | -1.30 | -0.38 | 7.89E-04 | -4.64E+01 | 4.64E+01 |
| ENSG00000166349 | RAG1          | 1.55 | 1.55  | 0.64  | 1.12E-03 | 4.64E+01  | 4.64E+01 |
| ENSG00000144504 | ANKMY1        | 1.37 | 1.37  | 0.45  | 8.69E-04 | 4.64E+01  | 4.64E+01 |
| ENSG00000133895 | MEN1          | 1.36 | 1.36  | 0.45  | 8.65E-04 | 4.64E+01  | 4.64E+01 |
| ENSG00000139684 | ESD           | 0.76 | -1.31 | -0.39 | 8.04E-04 | -4.62E+01 | 4.62E+01 |
| ENSG00000165359 | DDX26B        | 0.73 | -1.37 | -0.45 | 8.76E-04 | -4.62E+01 | 4.62E+01 |
| ENSG00000096654 | ZNF184        | 1.36 | 1.36  | 0.44  | 8.68E-04 | 4.61E+01  | 4.61E+01 |
| ENSG00000165029 | ABCA1         | 0.77 | -1.30 | -0.37 | 7.96E-04 | -4.60E+01 | 4.60E+01 |
| ENSG00000165943 | MOAP1         | 0.77 | -1.30 | -0.38 | 8.01E-04 | -4.59E+01 | 4.59E+01 |
|                 | RP11-222A11.1 | 0.60 | -1.65 | -0.73 | 1.30E-03 | -4.58E+01 | 4.58E+01 |
| ENSG00000130707 | ASS1          | 1.58 | 1.58  | 0.66  | 1.19E-03 | 4.58E+01  | 4.58E+01 |
| ENSG00000144134 | RABL2A        | 1.50 | 1.50  | 0.58  | 1.08E-03 | 4.56E+01  | 4.56E+01 |
| ENSG00000205208 | C4orf46       | 0.77 | -1.29 | -0.37 | 8.04E-04 | -4.55E+01 | 4.55E+01 |
| ENSG00000204264 | PSMB8         | 0.78 | -1.28 | -0.36 | 7.93E-04 | -4.55E+01 | 4.55E+01 |
| ENSG00000213689 | TREX1         | 0.72 | -1.40 | -0.48 | 9.45E-04 | -4.55E+01 | 4.55E+01 |
| ENSG00000163104 | SMARCAD1      | 1.40 | 1.40  | 0.49  | 9.56E-04 | 4.54E+01  | 4.54E+01 |
| ENSG00000205683 | DPF3          | 1.33 | 1.33  | 0.41  | 8.58E-04 | 4.52E+01  | 4.52E+01 |
| ENSG00000071082 | RPL31         | 0.74 | -1.36 | -0.44 | 9.05E-04 | -4.52E+01 | 4.52E+01 |
| ENSG00000169193 | CCDC126       | 1.36 | 1.36  | 0.45  | 9.12E-04 | 4.52E+01  | 4.52E+01 |
| ENSG00000132768 | DPH2          | 0.78 | -1.29 | -0.36 | 8.11E-04 | -4.52E+01 | 4.52E+01 |
| ENSG00000177191 | B3GNT8        | 0.60 | -1.66 | -0.73 | 1.35E-03 | -4.52E+01 | 4.52E+01 |
| ENSG00000126950 | TMEM35        | 1.33 | 1.33  | 0.41  | 8.71E-04 | 4.51E+01  | 4.51E+01 |
| ENSG00000151687 | ANKAR         | 0.66 | -1.50 | -0.59 | 1.11E-03 | -4.51E+01 | 4.51E+01 |
| ENSG00000113761 | ZNF346        | 0.77 | -1.29 | -0.37 | 8.21E-04 | -4.51E+01 | 4.51E+01 |
| ENSG00000204381 | LAYN          | 1.67 | 1.67  | 0.74  | 1.39E-03 | 4.50E+01  | 4.50E+01 |
| ENSG00000119402 | FBXW2         | 0.78 | -1.28 | -0.35 | 8.06E-04 | -4.50E+01 | 4.50E+01 |
| ENSG00000006062 | MAP3K14       | 0.73 | -1.38 | -0.46 | 9.41E-04 | -4.50E+01 | 4.50E+01 |
| ENSG00000177917 | ARL6IP6       | 0.77 | -1.30 | -0.38 | 8.41E-04 | -4.50E+01 | 4.50E+01 |
| ENSG00000196172 | ZNF681        | 0.63 | -1.59 | -0.67 | 1.25E-03 | -4.49E+01 | 4.49E+01 |
| ENSG00000145332 | KLHL8         | 0.78 | -1.28 | -0.36 | 8.22E-04 | -4.48E+01 | 4.48E+01 |
| ENSG00000165516 | KLHDC2        | 0.78 | -1.28 | -0.36 | 8.19E-04 | -4.47E+01 | 4.47E+01 |
| ENSG00000156802 | ATAD2         | 0.72 | -1.39 | -0.48 | 9.73E-04 | -4.47E+01 | 4.47E+01 |
| ENSG00000132321 | IQCA1         | 0.71 | -1.41 | -0.49 | 9.92E-04 | -4.46E+01 | 4.46E+01 |
|                 | AD000090.2    | 1.37 | 1.37  | 0.45  | 9.38E-04 | 4.46E+01  | 4.46E+01 |
| ENSG00000173145 | NOC3L         | 0.73 | -1.36 | -0.45 | 9.36E-04 | -4.45E+01 | 4.45E+01 |
| ENSG00000102393 | GLA           | 0.78 | -1.29 | -0.37 | 8.41E-04 | -4.44E+01 | 4.44E+01 |
| ENSG00000174227 | PIGG          | 1.29 | 1.29  | 0.37  | 8.45E-04 | 4.44E+01  | 4.44E+01 |
| ENSG00000178252 | WDR6          | 0.77 | -1.30 | -0.37 | 8.57E-04 | -4.43E+01 | 4.43E+01 |
| ENSG00000168214 | RBPJ          | 1.31 | 1.31  | 0.39  | 8.76E-04 | 4.43E+01  | 4.43E+01 |
| ENSG00000077238 | IL4R          | 1.28 | 1.28  | 0.36  | 8.45E-04 | 4.40E+01  | 4.40E+01 |
| ENSG00000174010 | KLHL15        | 0.75 | -1.33 | -0.41 | 9.17E-04 | -4.40E+01 | 4.40E+01 |
| ENSG00000112983 | BRD8          | 0.76 | -1.32 | -0.40 | 9.05E-04 | -4.40E+01 | 4.40E+01 |
| ENSG00000168566 | SNRNP48       | 0.78 | -1.28 | -0.35 | 8.44E-04 | -4.39E+01 | 4.39E+01 |
| ENSG00000181045 | SLC26A11      | 1.33 | 1.33  | 0.41  | 9.16E-04 | 4.39E+01  | 4.39E+01 |
| ENSG00000134508 | CABLES1       | 1.34 | 1.34  | 0.42  | 9.33E-04 | 4.38E+01  | 4.38E+01 |
| ENSG00000111144 | LTA4H         | 0.77 | -1.30 | -0.38 | 8.79E-04 | -4.38E+01 | 4.38E+01 |
| ENSG00000259953 | RP11-401.2    | 0.64 | -1.55 | -0.63 | 1.26E-03 | -4.38E+01 | 4.38E+01 |
| ENSG00000092439 | TRPM7         | 1.31 | 1.31  | 0.39  | 9.01E-04 | 4.38E+01  | 4.38E+01 |
| ENSG00000169684 | CHRNA5        | 0.74 | -1.35 | -0.43 | 9.53E-04 | -4.37E+01 | 4.37E+01 |
| ENSG00000140691 | ARMC5         | 1.31 | 1.31  | 0.39  | 9.01E-04 | 4.37E+01  | 4.37E+01 |
| ENSG00000134954 | ETS1          | 1.34 | 1.34  | 0.43  | 9.49E-04 | 4.36E+01  | 4.36E+01 |
| ENSG00000171467 | ZNF318        | 1.53 | 1.53  | 0.62  | 1.24E-03 | 4.36E+01  | 4.36E+01 |
| ENSG00000109654 | TRIM2         | 1.30 | 1.30  | 0.38  | 8.95E-04 | 4.35E+01  | 4.35E+01 |
| ENSG00000104081 | BMF           | 1.42 | 1.42  | 0.50  | 1.06E-03 | 4.35E+01  | 4.35E+01 |
| ENSG00000196110 | ZNF699        | 1.39 | 1.39  | 0.47  | 1.02E-03 | 4.35E+01  | 4.35E+01 |
| ENSG00000164258 | NDUFS4        | 0.76 | -1.31 | -0.39 | 9.15E-04 | -4.33E+01 | 4.33E+01 |
| ENSG00000170871 | KIAA0232      | 1.29 | 1.29  | 0.36  | 8.86E-04 | 4.32E+01  | 4.32E+01 |
| ENSG00000180263 | FGD6          | 1.28 | 1.28  | 0.36  | 8.82E-04 | 4.32E+01  | 4.32E+01 |
| ENSG00000174007 | CEP19         | 1.45 | 1.45  | 0.54  | 1.13E-03 | 4.32E+01  | 4.32E+01 |
| ENSG00000171793 | CTPS1         | 0.77 | -1.30 | -0.38 | 9.04E-04 | -4.32E+01 | 4.32E+01 |

|                 |                  |      |       |       |          |           |          |
|-----------------|------------------|------|-------|-------|----------|-----------|----------|
| ENSG00000168792 | ABHD15           | 1.35 | 1.35  | 0.43  | 9.80E-04 | 4.31E+01  | 4.31E+01 |
| ENSG00000251095 | RP11-115D19.1    | 0.64 | -1.57 | -0.65 | 1.33E-03 | -4.31E+01 | 4.31E+01 |
| ENSG00000214401 | KANSL1-AS1       | 1.54 | 1.54  | 0.62  | 1.27E-03 | 4.31E+01  | 4.31E+01 |
| ENSG00000087095 | NLK              | 1.28 | 1.28  | 0.36  | 8.87E-04 | 4.31E+01  | 4.31E+01 |
| ENSG00000105202 | FBL              | 0.67 | -1.50 | -0.59 | 1.21E-03 | -4.31E+01 | 4.31E+01 |
| ENSG00000177239 | MAN1B1           | 1.32 | 1.32  | 0.40  | 9.33E-04 | 4.31E+01  | 4.31E+01 |
| ENSG00000041988 | THAP3            | 0.74 | -1.35 | -0.43 | 9.79E-04 | -4.30E+01 | 4.30E+01 |
| ENSG00000177646 | ACAD9            | 0.77 | -1.30 | -0.38 | 9.11E-04 | -4.30E+01 | 4.30E+01 |
| ENSG00000182621 | PLCB1            | 1.34 | 1.34  | 0.43  | 9.77E-04 | 4.30E+01  | 4.30E+01 |
| ENSG00000184986 | TMEM121          | 0.61 | -1.65 | -0.72 | 1.48E-03 | -4.29E+01 | 4.29E+01 |
| ENSG00000114520 | SNX4             | 1.31 | 1.31  | 0.39  | 9.33E-04 | 4.28E+01  | 4.28E+01 |
| ENSG00000076351 | SLC46A1          | 1.38 | 1.38  | 0.47  | 1.04E-03 | 4.28E+01  | 4.28E+01 |
| ENSG00000273749 | CYFIP1           | 1.30 | 1.30  | 0.38  | 9.23E-04 | 4.28E+01  | 4.28E+01 |
| ENSG00000239407 | LLOXNC01-237H1.2 | 1.54 | 1.54  | 0.62  | 1.29E-03 | 4.28E+01  | 4.28E+01 |
| ENSG00000012817 | KDM5D            | 0.68 | -1.47 | -0.56 | 1.19E-03 | -4.27E+01 | 4.27E+01 |
| ENSG00000106025 | TSPAN12          | 0.78 | -1.28 | -0.36 | 9.08E-04 | -4.25E+01 | 4.25E+01 |
| ENSG00000102595 | UGGT2            | 0.74 | -1.35 | -0.43 | 1.00E-03 | -4.25E+01 | 4.25E+01 |
| ENSG00000236618 | PITPNA-AS1       | 0.71 | -1.41 | -0.49 | 1.10E-03 | -4.25E+01 | 4.25E+01 |
| ENSG00000164751 | PEX2             | 0.78 | -1.28 | -0.35 | 9.09E-04 | -4.24E+01 | 4.24E+01 |
| ENSG00000173517 | PEAK1            | 1.30 | 1.30  | 0.38  | 9.44E-04 | 4.23E+01  | 4.23E+01 |
| ENSG00000169641 | LUZP1            | 1.29 | 1.29  | 0.37  | 9.36E-04 | 4.23E+01  | 4.23E+01 |
| ENSG00000108179 | PPIF             | 0.77 | -1.30 | -0.38 | 9.45E-04 | -4.23E+01 | 4.23E+01 |
| ENSG00000109118 | PHF12            | 1.31 | 1.31  | 0.39  | 9.61E-04 | 4.23E+01  | 4.23E+01 |
| ENSG00000140682 | TGFB1I1          | 1.27 | 1.27  | 0.35  | 9.10E-04 | 4.22E+01  | 4.22E+01 |
| ENSG00000105829 | BET1             | 0.78 | -1.28 | -0.36 | 9.25E-04 | -4.22E+01 | 4.22E+01 |
| ENSG00000104866 | PPP1R37          | 0.78 | -1.29 | -0.36 | 9.28E-04 | -4.22E+01 | 4.22E+01 |
| ENSG00000206149 | HERC2P9          | 0.73 | -1.37 | -0.46 | 1.06E-03 | -4.22E+01 | 4.22E+01 |
| ENSG00000171109 | MFN1             | 0.77 | -1.30 | -0.38 | 9.54E-04 | -4.22E+01 | 4.22E+01 |
| ENSG00000170088 | TMEM192          | 1.28 | 1.28  | 0.35  | 9.19E-04 | 4.21E+01  | 4.21E+01 |
| ENSG00000101935 | AMMECR1          | 0.77 | -1.30 | -0.38 | 9.55E-04 | -4.20E+01 | 4.20E+01 |
| ENSG00000104731 | KLHDC4           | 0.78 | -1.29 | -0.36 | 9.39E-04 | -4.20E+01 | 4.20E+01 |
| ENSG00000275004 | ZNF280B          | 0.71 | -1.41 | -0.49 | 1.12E-03 | -4.20E+01 | 4.20E+01 |
| ENSG00000168036 | CTNNB1           | 1.30 | 1.30  | 0.38  | 9.64E-04 | 4.20E+01  | 4.20E+01 |
| ENSG00000267160 | RP11-1072C15.4   | 1.65 | 1.65  | 0.72  | 1.55E-03 | 4.20E+01  | 4.20E+01 |
| ENSG00000068650 | ATP11A           | 1.41 | 1.41  | 0.50  | 1.14E-03 | 4.19E+01  | 4.19E+01 |
| ENSG00000140948 | ZCCHC14          | 1.32 | 1.32  | 0.40  | 9.86E-04 | 4.19E+01  | 4.19E+01 |
| ENSG00000179041 | RRS1             | 0.75 | -1.34 | -0.42 | 1.02E-03 | -4.19E+01 | 4.19E+01 |
| ENSG00000128606 | LRRC17           | 0.77 | -1.31 | -0.38 | 9.73E-04 | -4.19E+01 | 4.19E+01 |
| ENSG00000132286 | FXC1             | 0.78 | -1.29 | -0.37 | 9.52E-04 | -4.18E+01 | 4.18E+01 |
| ENSG00000169291 | SHE              | 1.30 | 1.30  | 0.38  | 9.72E-04 | 4.17E+01  | 4.17E+01 |
| ENSG00000103365 | GGA2             | 0.78 | -1.28 | -0.35 | 9.37E-04 | -4.17E+01 | 4.17E+01 |
| ENSG00000154305 | MIA3             | 1.29 | 1.29  | 0.37  | 9.64E-04 | 4.17E+01  | 4.17E+01 |
| ENSG00000164073 | MFSD8            | 1.31 | 1.31  | 0.39  | 9.88E-04 | 4.16E+01  | 4.16E+01 |
| ENSG00000167182 | SP2              | 1.62 | 1.62  | 0.69  | 1.51E-03 | 4.16E+01  | 4.16E+01 |
| ENSG00000108107 | RPL28            | 0.69 | -1.44 | -0.53 | 1.21E-03 | -4.15E+01 | 4.15E+01 |
| ENSG00000178950 | GAK              | 1.30 | 1.30  | 0.38  | 9.83E-04 | 4.15E+01  | 4.15E+01 |
| ENSG00000143149 | ALDH9A1          | 0.78 | -1.28 | -0.36 | 9.58E-04 | -4.14E+01 | 4.14E+01 |
| ENSG00000116584 | ARHGEF2          | 1.32 | 1.32  | 0.40  | 1.02E-03 | 4.14E+01  | 4.14E+01 |
| ENSG00000231007 | CDC20P1          | 0.57 | -1.74 | -0.80 | 1.77E-03 | -4.13E+01 | 4.13E+01 |
| ENSG00000147439 | BIN3             | 0.78 | -1.29 | -0.37 | 9.72E-04 | -4.13E+01 | 4.13E+01 |
| ENSG00000179240 | RP11-111M22.2    | 1.58 | 1.58  | 0.66  | 1.46E-03 | 4.13E+01  | 4.13E+01 |
| ENSG00000110697 | PITPNM1          | 0.77 | -1.30 | -0.38 | 9.94E-04 | -4.12E+01 | 4.12E+01 |
| ENSG00000068001 | HYAL2            | 1.30 | 1.30  | 0.37  | 9.93E-04 | 4.11E+01  | 4.11E+01 |
| ENSG00000120519 | SLC10A7          | 0.76 | -1.32 | -0.40 | 1.04E-03 | -4.11E+01 | 4.11E+01 |
| ENSG00000234431 | AC007283.5       | 1.37 | 1.37  | 0.45  | 1.11E-03 | 4.11E+01  | 4.11E+01 |
| ENSG00000117984 | CTSD             | 1.33 | 1.33  | 0.41  | 1.05E-03 | 4.11E+01  | 4.11E+01 |
| ENSG00000067715 | SYT1             | 0.76 | -1.32 | -0.40 | 1.04E-03 | -4.11E+01 | 4.11E+01 |
| ENSG00000169594 | BNC1             | 1.29 | 1.29  | 0.37  | 9.90E-04 | 4.10E+01  | 4.10E+01 |
| ENSG00000213762 | ZNF134           | 1.32 | 1.32  | 0.40  | 1.03E-03 | 4.10E+01  | 4.10E+01 |
| ENSG00000213988 | ZNF90            | 0.64 | -1.57 | -0.65 | 1.46E-03 | -4.10E+01 | 4.10E+01 |
| ENSG00000176994 | SMCR8            | 1.29 | 1.29  | 0.37  | 9.99E-04 | 4.09E+01  | 4.09E+01 |
| ENSG00000183032 | SLC25A21         | 0.65 | -1.55 | -0.63 | 1.43E-03 | -4.09E+01 | 4.09E+01 |
| ENSG00000173933 | RBM4             | 0.73 | -1.37 | -0.46 | 1.13E-03 | -4.08E+01 | 4.08E+01 |
| ENSG00000124549 | BTN2A3P          | 0.73 | -1.36 | -0.45 | 1.11E-03 | -4.08E+01 | 4.08E+01 |
| ENSG00000109618 | SEPSECS          | 1.30 | 1.30  | 0.38  | 1.02E-03 | 4.07E+01  | 4.07E+01 |
| ENSG00000152582 | SPEF2            | 0.60 | -1.66 | -0.73 | 1.66E-03 | -4.07E+01 | 4.07E+01 |
| ENSG00000103351 | CLUAP1           | 0.77 | -1.29 | -0.37 | 1.01E-03 | -4.07E+01 | 4.07E+01 |
| ENSG00000138303 | ASCC1            | 1.28 | 1.28  | 0.35  | 9.88E-04 | 4.06E+01  | 4.06E+01 |
| ENSG00000105514 | RAB3D            | 0.76 | -1.31 | -0.39 | 1.04E-03 | -4.06E+01 | 4.06E+01 |
| ENSG00000007202 | KIAA0100         | 0.77 | -1.30 | -0.38 | 1.02E-03 | -4.06E+01 | 4.06E+01 |
| ENSG00000173917 | HOXB2            | 0.75 | -1.34 | -0.42 | 1.09E-03 | -4.06E+01 | 4.06E+01 |
| ENSG00000273542 | HIST1H4K         | 0.70 | -1.43 | -0.51 | 1.24E-03 | -4.06E+01 | 4.06E+01 |
| ENSG00000057252 | SOAT1            | 0.76 | -1.31 | -0.39 | 1.04E-03 | -4.06E+01 | 4.06E+01 |
| ENSG00000106344 | RBM28            | 0.78 | -1.29 | -0.36 | 1.01E-03 | -4.05E+01 | 4.05E+01 |
| ENSG00000253103 | RP11-946L20.4    | 1.51 | 1.51  | 0.59  | 1.39E-03 | 4.05E+01  | 4.05E+01 |
| ENSG00000130560 | UBAC1            | 0.78 | -1.28 | -0.36 | 1.00E-03 | -4.04E+01 | 4.04E+01 |
| ENSG00000138758 | SEPT11           | 1.30 | 1.30  | 0.38  | 1.04E-03 | 4.04E+01  | 4.04E+01 |
| ENSG00000255284 | AP006621.5       | 1.50 | 1.50  | 0.59  | 1.38E-03 | 4.04E+01  | 4.04E+01 |
| ENSG00000136052 | SLC41A2          | 1.31 | 1.31  | 0.39  | 1.05E-03 | 4.04E+01  | 4.04E+01 |

|                 |               |      |       |       |          |           |          |
|-----------------|---------------|------|-------|-------|----------|-----------|----------|
| ENSG00000084090 | STARD7        | 0.77 | -1.30 | -0.37 | 1.03E-03 | -4.04E+01 | 4.04E+01 |
| ENSG00000024048 | UBR2          | 1.29 | 1.29  | 0.37  | 1.02E-03 | 4.03E+01  | 4.03E+01 |
| ENSG00000103591 | AAGAB         | 0.77 | -1.30 | -0.38 | 1.05E-03 | -4.03E+01 | 4.03E+01 |
| ENSG00000179588 | ZFPM1         | 1.76 | 1.76  | 0.81  | 1.90E-03 | 4.03E+01  | 4.03E+01 |
| ENSG00000154114 | TBCEL         | 1.29 | 1.29  | 0.37  | 1.03E-03 | 4.03E+01  | 4.03E+01 |
| ENSG00000160075 | SSU72         | 1.29 | 1.29  | 0.37  | 1.03E-03 | 4.02E+01  | 4.02E+01 |
| ENSG00000139697 | SBNO1         | 1.30 | 1.30  | 0.38  | 1.05E-03 | 4.01E+01  | 4.01E+01 |
| ENSG00000169902 | TPST1         | 0.78 | -1.29 | -0.36 | 1.03E-03 | -4.01E+01 | 4.01E+01 |
| ENSG00000134330 | IAH1          | 0.78 | -1.28 | -0.36 | 1.02E-03 | -4.00E+01 | 4.00E+01 |
| ENSG00000188827 | SLX4          | 1.39 | 1.39  | 0.47  | 1.20E-03 | 4.00E+01  | 4.00E+01 |
| ENSG00000140199 | SLC12A6       | 1.28 | 1.28  | 0.35  | 1.02E-03 | 4.00E+01  | 4.00E+01 |
| ENSG00000187994 | RINL          | 0.75 | -1.33 | -0.41 | 1.11E-03 | -3.99E+01 | 3.99E+01 |
| ENSG00000184113 | CLDN5         | 1.30 | 1.30  | 0.38  | 1.06E-03 | 3.99E+01  | 3.99E+01 |
| ENSG00000168067 | MAP4K2        | 0.78 | -1.28 | -0.36 | 1.03E-03 | -3.99E+01 | 3.99E+01 |
| ENSG00000101654 | RNMT          | 1.28 | 1.28  | 0.35  | 1.03E-03 | 3.98E+01  | 3.98E+01 |
| ENSG00000170515 | PA2G4         | 0.77 | -1.30 | -0.38 | 1.07E-03 | -3.98E+01 | 3.98E+01 |
| ENSG00000083635 | NUFIP1        | 0.76 | -1.31 | -0.39 | 1.08E-03 | -3.98E+01 | 3.98E+01 |
| ENSG00000138613 | APH1B         | 1.29 | 1.29  | 0.36  | 1.05E-03 | 3.98E+01  | 3.98E+01 |
| ENSG00000085433 | WDR47         | 1.27 | 1.27  | 0.35  | 1.03E-03 | 3.97E+01  | 3.97E+01 |
| ENSG00000163832 | ELP6          | 0.79 | -1.27 | -0.35 | 1.03E-03 | -3.97E+01 | 3.97E+01 |
| ENSG00000066926 | FECH          | 0.78 | -1.28 | -0.35 | 1.04E-03 | -3.97E+01 | 3.97E+01 |
| ENSG00000171204 | TMEM126B      | 0.78 | -1.28 | -0.36 | 1.05E-03 | -3.96E+01 | 3.96E+01 |
| ENSG00000123297 | TSFM          | 0.78 | -1.28 | -0.35 | 1.04E-03 | -3.96E+01 | 3.96E+01 |
| ENSG00000180891 | CUEDC1        | 1.30 | 1.30  | 0.38  | 1.08E-03 | 3.96E+01  | 3.96E+01 |
| ENSG00000163050 | ADCK3         | 0.75 | -1.34 | -0.42 | 1.15E-03 | -3.96E+01 | 3.96E+01 |
| ENSG00000108469 | RECQL5        | 1.33 | 1.33  | 0.41  | 1.13E-03 | 3.96E+01  | 3.96E+01 |
| ENSG00000134253 | TRIM45        | 0.68 | -1.47 | -0.55 | 1.38E-03 | -3.95E+01 | 3.95E+01 |
| ENSG00000257923 | CUX1          | 1.29 | 1.29  | 0.37  | 1.07E-03 | 3.95E+01  | 3.95E+01 |
| ENSG00000164342 | TLR3          | 0.71 | -1.41 | -0.50 | 1.28E-03 | -3.95E+01 | 3.95E+01 |
| ENSG00000215190 | LINC00680     | 0.71 | -1.40 | -0.49 | 1.26E-03 | -3.94E+01 | 3.94E+01 |
| ENSG00000151694 | ADAM17        | 1.30 | 1.30  | 0.37  | 1.09E-03 | 3.92E+01  | 3.92E+01 |
| ENSG00000155229 | MMS19         | 0.77 | -1.30 | -0.37 | 1.09E-03 | -3.92E+01 | 3.92E+01 |
| ENSG00000151923 | TIAL1         | 0.79 | -1.27 | -0.35 | 1.06E-03 | -3.92E+01 | 3.92E+01 |
|                 | RP11-296110.6 | 1.38 | 1.38  | 0.46  | 1.25E-03 | 3.90E+01  | 3.90E+01 |
| ENSG00000256043 | CTSO          | 1.35 | 1.35  | 0.44  | 1.21E-03 | 3.90E+01  | 3.90E+01 |
| ENSG00000182903 | ZNF721        | 1.37 | 1.37  | 0.46  | 1.24E-03 | 3.89E+01  | 3.89E+01 |
| ENSG00000224531 | C6orf228      | 1.28 | 1.28  | 0.36  | 1.09E-03 | 3.89E+01  | 3.89E+01 |
| ENSG00000007392 | LUC7L         | 0.78 | -1.29 | -0.37 | 1.11E-03 | -3.88E+01 | 3.88E+01 |
| ENSG00000123739 | PLA2G12A      | 0.78 | -1.28 | -0.36 | 1.10E-03 | -3.87E+01 | 3.87E+01 |
| ENSG00000168386 | FILIP1L       | 1.33 | 1.33  | 0.41  | 1.19E-03 | 3.86E+01  | 3.86E+01 |
| ENSG00000135083 | CCNJL         | 1.30 | 1.30  | 0.38  | 1.14E-03 | 3.85E+01  | 3.85E+01 |
| ENSG00000169217 | CD2BP2        | 0.78 | -1.29 | -0.37 | 1.12E-03 | -3.85E+01 | 3.85E+01 |
| ENSG00000112183 | RBM24         | 1.42 | 1.42  | 0.51  | 1.37E-03 | 3.84E+01  | 3.84E+01 |
| ENSG00000158526 | TSR2          | 0.78 | -1.29 | -0.36 | 1.12E-03 | -3.84E+01 | 3.84E+01 |
| ENSG00000167815 | PRDX2         | 1.29 | 1.29  | 0.37  | 1.14E-03 | 3.84E+01  | 3.84E+01 |
| ENSG00000205362 | MT1A          | 0.63 | -1.60 | -0.67 | 1.73E-03 | -3.84E+01 | 3.84E+01 |
| ENSG00000030582 | GRN           | 1.56 | 1.56  | 0.64  | 1.67E-03 | 3.83E+01  | 3.83E+01 |
| ENSG00000051620 | HEBP2         | 0.77 | -1.30 | -0.38 | 1.16E-03 | -3.82E+01 | 3.82E+01 |
| ENSG00000189308 | LIN54         | 0.78 | -1.28 | -0.35 | 1.12E-03 | -3.82E+01 | 3.82E+01 |
| ENSG00000134153 | EMC7          | 0.77 | -1.30 | -0.38 | 1.15E-03 | -3.82E+01 | 3.82E+01 |
| ENSG00000107443 | CCNJ          | 1.31 | 1.31  | 0.39  | 1.18E-03 | 3.81E+01  | 3.81E+01 |
| ENSG00000091136 | LAMB1         | 1.29 | 1.29  | 0.37  | 1.16E-03 | 3.80E+01  | 3.80E+01 |
| ENSG00000126088 | UROD          | 1.29 | 1.29  | 0.36  | 1.15E-03 | 3.80E+01  | 3.80E+01 |
| ENSG00000160113 | NR2F6         | 1.27 | 1.27  | 0.35  | 1.13E-03 | 3.79E+01  | 3.79E+01 |
| ENSG00000123609 | NMI           | 0.78 | -1.28 | -0.36 | 1.15E-03 | -3.78E+01 | 3.78E+01 |
| ENSG00000165312 | OTUD1         | 1.36 | 1.36  | 0.44  | 1.28E-03 | 3.78E+01  | 3.78E+01 |
| ENSG00000188636 | LDOC1L        | 1.28 | 1.28  | 0.35  | 1.14E-03 | 3.78E+01  | 3.78E+01 |
| ENSG00000166813 | KIF7          | 0.76 | -1.31 | -0.39 | 1.21E-03 | -3.78E+01 | 3.78E+01 |
| ENSG00000142657 | PGD           | 0.77 | -1.29 | -0.37 | 1.17E-03 | -3.77E+01 | 3.77E+01 |
| ENSG00000168487 | BMP1          | 1.28 | 1.28  | 0.36  | 1.16E-03 | 3.77E+01  | 3.77E+01 |
| ENSG00000164930 | FZD6          | 1.30 | 1.30  | 0.38  | 1.19E-03 | 3.77E+01  | 3.77E+01 |
| ENSG00000189046 | ALKBH2        | 0.74 | -1.36 | -0.44 | 1.30E-03 | -3.76E+01 | 3.76E+01 |
| ENSG00000214765 | SEPT7P2       | 0.72 | -1.39 | -0.48 | 1.38E-03 | -3.76E+01 | 3.76E+01 |
| ENSG00000243335 | KCTD7         | 0.75 | -1.34 | -0.42 | 1.28E-03 | -3.76E+01 | 3.76E+01 |
| ENSG00000102802 | MEDAG         | 1.28 | 1.28  | 0.36  | 1.17E-03 | 3.75E+01  | 3.75E+01 |
| ENSG00000115685 | PPP1R7        | 1.28 | 1.28  | 0.35  | 1.16E-03 | 3.74E+01  | 3.74E+01 |
| ENSG00000139725 | RHOF          | 0.62 | -1.60 | -0.68 | 1.85E-03 | -3.73E+01 | 3.73E+01 |
| ENSG00000154642 | C21orf91      | 1.44 | 1.44  | 0.53  | 1.50E-03 | 3.72E+01  | 3.72E+01 |
| ENSG00000100949 | RABGGTA       | 1.39 | 1.39  | 0.47  | 1.40E-03 | 3.71E+01  | 3.71E+01 |
| ENSG00000186448 | ZNF197        | 1.30 | 1.30  | 0.37  | 1.22E-03 | 3.71E+01  | 3.71E+01 |
| ENSG00000213390 | ARHGAP19      | 0.78 | -1.28 | -0.35 | 1.19E-03 | -3.71E+01 | 3.71E+01 |
| ENSG00000269335 | IKBKG         | 1.30 | 1.30  | 0.38  | 1.23E-03 | 3.70E+01  | 3.70E+01 |
| ENSG00000137962 | ARHGAP29      | 1.30 | 1.30  | 0.38  | 1.24E-03 | 3.70E+01  | 3.70E+01 |
| ENSG00000128309 | MPST          | 1.29 | 1.29  | 0.37  | 1.22E-03 | 3.69E+01  | 3.69E+01 |
| ENSG00000175166 | PSMD2         | 1.30 | 1.30  | 0.38  | 1.25E-03 | 3.69E+01  | 3.69E+01 |
| ENSG00000120217 | CD274         | 1.30 | 1.30  | 0.38  | 1.25E-03 | 3.69E+01  | 3.69E+01 |
| ENSG00000164631 | ZNF12         | 1.37 | 1.37  | 0.45  | 1.38E-03 | 3.68E+01  | 3.68E+01 |
| ENSG00000230124 | ACBD6         | 0.78 | -1.28 | -0.35 | 1.21E-03 | -3.68E+01 | 3.68E+01 |
| ENSG00000128626 | MRPS12        | 0.76 | -1.31 | -0.39 | 1.27E-03 | -3.68E+01 | 3.68E+01 |

|                  |               |      |       |       |          |           |          |
|------------------|---------------|------|-------|-------|----------|-----------|----------|
| ENSG00000127804  | METTL16       | 0.78 | -1.28 | -0.36 | 1.22E-03 | -3.68E+01 | 3.68E+01 |
| ENSG00000234327  | AC012146.7    | 1.45 | 1.45  | 0.53  | 1.55E-03 | 3.67E+01  | 3.67E+01 |
| ENSG00000169955  | ZNF747        | 1.32 | 1.32  | 0.40  | 1.29E-03 | 3.67E+01  | 3.67E+01 |
| ENSG00000103005  | USB1          | 0.76 | -1.32 | -0.40 | 1.30E-03 | -3.66E+01 | 3.66E+01 |
| ENSG00000230849  | GOT2P2        | 1.68 | 1.68  | 0.75  | 2.11E-03 | 3.66E+01  | 3.66E+01 |
| ENSG00000170540  | ARL61P1       | 0.78 | -1.29 | -0.37 | 1.24E-03 | -3.66E+01 | 3.66E+01 |
| ENSG00000108219  | TSPAN14       | 1.29 | 1.29  | 0.37  | 1.24E-03 | 3.65E+01  | 3.65E+01 |
| ENSG00000075975  | MKRN2         | 0.77 | -1.29 | -0.37 | 1.25E-03 | -3.65E+01 | 3.65E+01 |
| ENSG00000163637  | PRICKLE2      | 0.74 | -1.35 | -0.44 | 1.37E-03 | -3.65E+01 | 3.65E+01 |
| ENSG000000084234 | APLP2         | 1.29 | 1.29  | 0.37  | 1.25E-03 | 3.65E+01  | 3.65E+01 |
| ENSG00000172301  | C17orf79      | 0.79 | -1.27 | -0.34 | 1.21E-03 | -3.65E+01 | 3.65E+01 |
| ENSG00000160310  | PRMT2         | 0.78 | -1.28 | -0.36 | 1.24E-03 | -3.64E+01 | 3.64E+01 |
| ENSG00000164808  | KIAA0146      | 0.79 | -1.27 | -0.35 | 1.22E-03 | -3.64E+01 | 3.64E+01 |
| ENSG00000128487  | SPECC1        | 1.31 | 1.31  | 0.39  | 1.29E-03 | 3.64E+01  | 3.64E+01 |
| ENSG00000266208  | CTD-2267D19.3 | 0.67 | -1.49 | -0.57 | 1.68E-03 | -3.63E+01 | 3.63E+01 |
| ENSG00000100410  | PHF5A         | 0.78 | -1.28 | -0.36 | 1.25E-03 | -3.63E+01 | 3.63E+01 |
| ENSG00000157625  | TAB3          | 1.28 | 1.28  | 0.35  | 1.24E-03 | 3.62E+01  | 3.62E+01 |
| ENSG00000054267  | ARID4B        | 1.38 | 1.38  | 0.47  | 1.46E-03 | 3.62E+01  | 3.62E+01 |
| ENSG00000200087  | SNORA73B      | 0.63 | -1.58 | -0.66 | 1.92E-03 | -3.62E+01 | 3.62E+01 |
| ENSG00000267519  | CTD-3252C9.4  | 1.37 | 1.37  | 0.46  | 1.44E-03 | 3.62E+01  | 3.62E+01 |
| ENSG00000176155  | CCDC57        | 1.33 | 1.33  | 0.41  | 1.36E-03 | 3.62E+01  | 3.62E+01 |
| ENSG00000136280  | CCM2          | 0.79 | -1.26 | -0.34 | 1.22E-03 | -3.61E+01 | 3.61E+01 |
| ENSG00000213918  | DNASE1        | 1.34 | 1.34  | 0.42  | 1.37E-03 | 3.61E+01  | 3.61E+01 |
| ENSG00000170915  | PAQR8         | 1.33 | 1.33  | 0.41  | 1.36E-03 | 3.61E+01  | 3.61E+01 |
| ENSG00000123737  | EXOSC9        | 0.78 | -1.28 | -0.36 | 1.26E-03 | -3.60E+01 | 3.60E+01 |
| ENSG00000053900  | ANAPC4        | 0.77 | -1.29 | -0.37 | 1.29E-03 | -3.60E+01 | 3.60E+01 |
| ENSG00000198931  | APRT          | 0.78 | -1.29 | -0.36 | 1.29E-03 | -3.58E+01 | 3.58E+01 |
| ENSG00000188312  | CENPP         | 0.75 | -1.34 | -0.42 | 1.41E-03 | -3.57E+01 | 3.57E+01 |
| ENSG00000133678  | TMEM254       | 1.36 | 1.36  | 0.44  | 1.46E-03 | 3.56E+01  | 3.56E+01 |
| ENSG00000159214  | CCDC24        | 0.67 | -1.49 | -0.57 | 1.74E-03 | -3.56E+01 | 3.56E+01 |
| ENSG00000109062  | SLC9A3R1      | 0.77 | -1.30 | -0.38 | 1.33E-03 | -3.56E+01 | 3.56E+01 |
| ENSG00000177200  | CHD9          | 1.49 | 1.49  | 0.57  | 1.76E-03 | 3.54E+01  | 3.54E+01 |
| ENSG00000107815  | C10orf2       | 0.74 | -1.36 | -0.44 | 1.47E-03 | -3.53E+01 | 3.53E+01 |
| ENSG00000214174  | AMZ2P1        | 1.39 | 1.39  | 0.48  | 1.56E-03 | 3.53E+01  | 3.53E+01 |
| ENSG00000144026  | ZNF514        | 1.29 | 1.29  | 0.37  | 1.34E-03 | 3.53E+01  | 3.53E+01 |
| ENSG00000229334  | AC046143.3    | 0.64 | -1.56 | -0.64 | 1.95E-03 | -3.53E+01 | 3.53E+01 |
| ENSG00000117475  | BLZF1         | 1.35 | 1.35  | 0.43  | 1.46E-03 | 3.52E+01  | 3.52E+01 |
| ENSG00000177613  | CSTF2T        | 0.79 | -1.27 | -0.34 | 1.30E-03 | -3.52E+01 | 3.52E+01 |
| ENSG00000235609  | AF127936.7    | 0.65 | -1.55 | -0.63 | 1.94E-03 | -3.52E+01 | 3.52E+01 |
| ENSG00000171492  | LRRC8D        | 0.78 | -1.27 | -0.35 | 1.31E-03 | -3.52E+01 | 3.52E+01 |
| ENSG00000278845  | MRPL45        | 1.27 | 1.27  | 0.34  | 1.30E-03 | 3.51E+01  | 3.51E+01 |
| ENSG00000161677  | JOSD2         | 1.35 | 1.35  | 0.43  | 1.47E-03 | 3.51E+01  | 3.51E+01 |
| ENSG00000143222  | UFC1          | 0.77 | -1.29 | -0.37 | 1.36E-03 | -3.51E+01 | 3.51E+01 |
| ENSG0000023516   | AKAP11        | 1.47 | 1.47  | 0.56  | 1.76E-03 | 3.51E+01  | 3.51E+01 |
| ENSG00000133935  | C14orf1       | 0.79 | -1.27 | -0.34 | 1.31E-03 | -3.50E+01 | 3.50E+01 |
| ENSG00000145431  | PDGFC         | 1.32 | 1.32  | 0.40  | 1.41E-03 | 3.50E+01  | 3.50E+01 |
| ENSG00000141627  | DYM           | 0.78 | -1.28 | -0.35 | 1.34E-03 | -3.49E+01 | 3.49E+01 |
| ENSG00000198774  | RASSF9        | 0.62 | -1.61 | -0.69 | 2.12E-03 | -3.49E+01 | 3.49E+01 |
| ENSG00000198920  | KIAA0753      | 1.27 | 1.27  | 0.34  | 1.32E-03 | 3.49E+01  | 3.49E+01 |
| ENSG00000150455  | TIRAP         | 0.71 | -1.42 | -0.50 | 1.65E-03 | -3.49E+01 | 3.49E+01 |
| ENSG00000060982  | BCAT1         | 1.38 | 1.38  | 0.46  | 1.57E-03 | 3.49E+01  | 3.49E+01 |
| ENSG00000186222  | BLOC1S4       | 1.32 | 1.32  | 0.40  | 1.43E-03 | 3.48E+01  | 3.48E+01 |
| ENSG00000141522  | ARHGDI4       | 1.38 | 1.38  | 0.46  | 1.56E-03 | 3.48E+01  | 3.48E+01 |
| ENSG00000129757  | CDKN1C        | 1.50 | 1.50  | 0.58  | 1.85E-03 | 3.48E+01  | 3.48E+01 |
| ENSG00000086991  | NOX4          | 0.79 | -1.27 | -0.35 | 1.34E-03 | -3.47E+01 | 3.47E+01 |
| ENSG00000184232  | OAF           | 1.29 | 1.29  | 0.37  | 1.40E-03 | 3.46E+01  | 3.46E+01 |
| ENSG00000185361  | TNFAIP8L1     | 1.28 | 1.28  | 0.36  | 1.37E-03 | 3.46E+01  | 3.46E+01 |
| ENSG00000178202  | KDEL2         | 1.28 | 1.28  | 0.36  | 1.38E-03 | 3.46E+01  | 3.46E+01 |
| ENSG00000152433  | ZNF547        | 1.50 | 1.50  | 0.59  | 1.91E-03 | 3.43E+01  | 3.43E+01 |
| ENSG00000167778  | SPRYD3        | 0.79 | -1.27 | -0.35 | 1.38E-03 | -3.42E+01 | 3.42E+01 |
| ENSG00000106853  | PTGR1         | 0.75 | -1.33 | -0.41 | 1.51E-03 | -3.42E+01 | 3.42E+01 |
| ENSG00000184209  | SNRNP35       | 0.77 | -1.30 | -0.38 | 1.45E-03 | -3.41E+01 | 3.41E+01 |
| ENSG00000134779  | TPGS2         | 0.78 | -1.28 | -0.36 | 1.42E-03 | -3.41E+01 | 3.41E+01 |
| ENSG00000254615  | RP11-395G23.3 | 0.66 | -1.51 | -0.60 | 1.97E-03 | -3.41E+01 | 3.41E+01 |
| ENSG00000131018  | SYNE1         | 1.32 | 1.32  | 0.40  | 1.49E-03 | 3.41E+01  | 3.41E+01 |
| ENSG00000231025  | RP11-175O19.4 | 1.39 | 1.39  | 0.47  | 1.67E-03 | 3.40E+01  | 3.40E+01 |
| ENSG00000145016  | KIAA0226      | 1.30 | 1.30  | 0.38  | 1.46E-03 | 3.40E+01  | 3.40E+01 |
| ENSG00000128915  | NARG2         | 0.76 | -1.32 | -0.40 | 1.50E-03 | -3.40E+01 | 3.40E+01 |
| ENSG00000134852  | CLOCK         | 1.39 | 1.39  | 0.48  | 1.68E-03 | 3.40E+01  | 3.40E+01 |
| ENSG00000198815  | FOXJ3         | 1.36 | 1.36  | 0.45  | 1.61E-03 | 3.39E+01  | 3.39E+01 |
| ENSG00000168283  | BMI1          | 1.29 | 1.29  | 0.36  | 1.44E-03 | 3.39E+01  | 3.39E+01 |
| ENSG00000057757  | PITHD1        | 0.78 | -1.28 | -0.36 | 1.43E-03 | -3.39E+01 | 3.39E+01 |
| ENSG00000105698  | USF2          | 1.28 | 1.28  | 0.36  | 1.43E-03 | 3.38E+01  | 3.38E+01 |
| ENSG00000174373  | RALGAPA1      | 1.29 | 1.29  | 0.36  | 1.45E-03 | 3.38E+01  | 3.38E+01 |
| ENSG00000030066  | NUP160        | 0.79 | -1.27 | -0.35 | 1.42E-03 | -3.38E+01 | 3.38E+01 |
| ENSG00000091127  | PUS7          | 0.78 | -1.29 | -0.37 | 1.46E-03 | -3.37E+01 | 3.37E+01 |
| ENSG00000179218  | CALR          | 0.77 | -1.30 | -0.37 | 1.48E-03 | -3.37E+01 | 3.37E+01 |
| ENSG00000141452  | C18orf8       | 1.26 | 1.26  | 0.34  | 1.41E-03 | 3.36E+01  | 3.36E+01 |
| ENSG00000128245  | YWHAH         | 1.28 | 1.28  | 0.36  | 1.46E-03 | 3.36E+01  | 3.36E+01 |

|                 |               |      |       |       |          |           |          |
|-----------------|---------------|------|-------|-------|----------|-----------|----------|
| ENSG00000108578 | BLMH          | 0.78 | -1.28 | -0.35 | 1.45E-03 | -3.36E+01 | 3.36E+01 |
| ENSG00000163320 | CGGBP1        | 1.31 | 1.31  | 0.39  | 1.53E-03 | 3.35E+01  | 3.35E+01 |
| ENSG00000211584 | SLC48A1       | 0.77 | -1.31 | -0.39 | 1.52E-03 | -3.35E+01 | 3.35E+01 |
| ENSG00000173894 | CBX2          | 1.27 | 1.27  | 0.34  | 1.44E-03 | 3.35E+01  | 3.35E+01 |
| ENSG00000126106 | TMEM53        | 1.43 | 1.43  | 0.52  | 1.84E-03 | 3.35E+01  | 3.35E+01 |
| ENSG00000170296 | GABARAP       | 0.63 | -1.58 | -0.66 | 2.24E-03 | -3.33E+01 | 3.33E+01 |
| ENSG00000106397 | PLOD3         | 1.41 | 1.41  | 0.50  | 1.80E-03 | 3.33E+01  | 3.33E+01 |
| ENSG00000136243 | NUPL2         | 0.79 | -1.26 | -0.34 | 1.45E-03 | -3.32E+01 | 3.32E+01 |
| ENSG00000146858 | ZC3HAV1L      | 1.35 | 1.35  | 0.43  | 1.65E-03 | 3.32E+01  | 3.32E+01 |
| ENSG00000213638 | ADAT3         | 1.81 | 1.81  | 0.85  | 2.97E-03 | 3.32E+01  | 3.32E+01 |
| ENSG00000144840 | RABL3         | 0.79 | -1.26 | -0.33 | 1.45E-03 | -3.31E+01 | 3.31E+01 |
| ENSG00000136631 | VPS45         | 0.79 | -1.26 | -0.34 | 1.46E-03 | -3.30E+01 | 3.30E+01 |
| ENSG00000237036 | ZEB1-AS1      | 1.48 | 1.48  | 0.56  | 2.00E-03 | 3.30E+01  | 3.30E+01 |
| ENSG00000145194 | ECE2          | 0.71 | -1.40 | -0.49 | 1.80E-03 | -3.30E+01 | 3.30E+01 |
| ENSG00000160145 | KALRN         | 0.74 | -1.35 | -0.43 | 1.68E-03 | -3.29E+01 | 3.29E+01 |
| ENSG00000101188 | NTSR1         | 1.56 | 1.56  | 0.64  | 2.25E-03 | 3.28E+01  | 3.28E+01 |
| ENSG00000120129 | DUSP1         | 1.27 | 1.27  | 0.35  | 1.50E-03 | 3.28E+01  | 3.28E+01 |
|                 | RP11-151N17.2 | 0.71 | -1.41 | -0.50 | 1.86E-03 | -3.28E+01 | 3.28E+01 |
| ENSG00000260035 | CTD-2651B20.6 | 0.59 | -1.69 | -0.76 | 2.68E-03 | -3.27E+01 | 3.27E+01 |
| ENSG00000164209 | SLC25A46      | 1.31 | 1.31  | 0.39  | 1.60E-03 | 3.27E+01  | 3.27E+01 |
| ENSG00000163964 | PIGX          | 0.76 | -1.31 | -0.39 | 1.62E-03 | -3.27E+01 | 3.27E+01 |
| ENSG00000163697 | APBB2         | 1.29 | 1.29  | 0.37  | 1.56E-03 | 3.26E+01  | 3.26E+01 |
| ENSG00000196632 | WNK3          | 0.72 | -1.39 | -0.48 | 1.83E-03 | -3.26E+01 | 3.26E+01 |
| ENSG00000140525 | FANCI         | 0.78 | -1.28 | -0.36 | 1.54E-03 | -3.26E+01 | 3.26E+01 |
| ENSG00000101421 | CHMP4B        | 1.36 | 1.36  | 0.44  | 1.74E-03 | 3.26E+01  | 3.26E+01 |
| ENSG00000002549 | LAP3          | 0.78 | -1.28 | -0.36 | 1.56E-03 | -3.25E+01 | 3.25E+01 |
| ENSG00000188483 | IERSL         | 0.74 | -1.36 | -0.44 | 1.75E-03 | -3.25E+01 | 3.25E+01 |
| ENSG00000085733 | CTTN          | 1.28 | 1.28  | 0.36  | 1.56E-03 | 3.25E+01  | 3.25E+01 |
| ENSG00000141076 | CIRH1A        | 0.74 | -1.34 | -0.43 | 1.72E-03 | -3.24E+01 | 3.24E+01 |
| ENSG00000125834 | STK35         | 1.28 | 1.28  | 0.36  | 1.57E-03 | 3.24E+01  | 3.24E+01 |
| ENSG00000012983 | MAP4K5        | 1.30 | 1.30  | 0.38  | 1.61E-03 | 3.24E+01  | 3.24E+01 |
| ENSG00000112759 | SLC29A1       | 0.78 | -1.28 | -0.36 | 1.56E-03 | -3.24E+01 | 3.24E+01 |
| ENSG00000119559 | C19orf25      | 0.77 | -1.31 | -0.38 | 1.63E-03 | -3.23E+01 | 3.23E+01 |
| ENSG00000118058 | MLL           | 1.30 | 1.30  | 0.38  | 1.63E-03 | 3.23E+01  | 3.23E+01 |
| ENSG00000171858 | RPS21         | 0.70 | -1.44 | -0.52 | 1.98E-03 | -3.23E+01 | 3.23E+01 |
| ENSG00000113460 | BRIX1         | 0.79 | -1.27 | -0.34 | 1.54E-03 | -3.22E+01 | 3.22E+01 |
| ENSG00000135862 | LAMC1         | 1.42 | 1.42  | 0.51  | 1.94E-03 | 3.22E+01  | 3.22E+01 |
| ENSG00000164741 | DLC1          | 1.35 | 1.35  | 0.43  | 1.76E-03 | 3.22E+01  | 3.22E+01 |
| ENSG00000197594 | ENPP1         | 0.77 | -1.29 | -0.37 | 1.62E-03 | -3.22E+01 | 3.22E+01 |
| ENSG00000014216 | CAPN1         | 1.30 | 1.30  | 0.38  | 1.63E-03 | 3.22E+01  | 3.22E+01 |
| ENSG00000160688 | FLAD1         | 0.79 | -1.26 | -0.33 | 1.54E-03 | -3.21E+01 | 3.21E+01 |
| ENSG00000125845 | BMP2          | 1.29 | 1.29  | 0.37  | 1.64E-03 | 3.20E+01  | 3.20E+01 |
| ENSG00000143093 | STRIP1        | 0.72 | -1.38 | -0.47 | 1.88E-03 | -3.19E+01 | 3.19E+01 |
| ENSG00000165675 | ENOX2         | 0.77 | -1.30 | -0.38 | 1.65E-03 | -3.19E+01 | 3.19E+01 |
| ENSG00000035115 | SH3YL1        | 1.28 | 1.28  | 0.36  | 1.62E-03 | 3.18E+01  | 3.18E+01 |
| ENSG00000145632 | PLK2          | 1.29 | 1.29  | 0.36  | 1.65E-03 | 3.17E+01  | 3.17E+01 |
| ENSG00000175582 | RAB6A         | 1.28 | 1.28  | 0.36  | 1.64E-03 | 3.17E+01  | 3.17E+01 |
| ENSG00000065526 | SPEN          | 1.31 | 1.31  | 0.39  | 1.70E-03 | 3.17E+01  | 3.17E+01 |
| ENSG00000198736 | MSRB1         | 0.74 | -1.35 | -0.43 | 1.82E-03 | -3.17E+01 | 3.17E+01 |
| ENSG00000105877 | DNAH11        | 0.72 | -1.39 | -0.47 | 1.92E-03 | -3.17E+01 | 3.17E+01 |
| ENSG00000008988 | RPS20         | 0.75 | -1.33 | -0.41 | 1.76E-03 | -3.16E+01 | 3.16E+01 |
| ENSG00000115762 | PLEKHB2       | 1.32 | 1.32  | 0.40  | 1.75E-03 | 3.15E+01  | 3.15E+01 |
| ENSG00000106771 | TMEM245       | 1.28 | 1.28  | 0.36  | 1.66E-03 | 3.15E+01  | 3.15E+01 |
| ENSG00000242372 | EIF6          | 0.77 | -1.29 | -0.37 | 1.68E-03 | -3.15E+01 | 3.15E+01 |
| ENSG00000076108 | BAZ2A         | 1.32 | 1.32  | 0.40  | 1.75E-03 | 3.14E+01  | 3.14E+01 |
| ENSG00000108963 | DPH1          | 1.34 | 1.34  | 0.42  | 1.81E-03 | 3.14E+01  | 3.14E+01 |
| ENSG00000013503 | POLR3B        | 0.77 | -1.30 | -0.38 | 1.72E-03 | -3.14E+01 | 3.14E+01 |
| ENSG00000065833 | ME1           | 0.78 | -1.28 | -0.35 | 1.66E-03 | -3.13E+01 | 3.13E+01 |
| ENSG00000198612 | COPS8         | 0.78 | -1.28 | -0.36 | 1.67E-03 | -3.13E+01 | 3.13E+01 |
| ENSG00000122986 | HVCN1         | 0.72 | -1.39 | -0.48 | 1.98E-03 | -3.13E+01 | 3.13E+01 |
| ENSG00000176438 | LINC00341     | 1.43 | 1.43  | 0.51  | 2.08E-03 | 3.12E+01  | 3.12E+01 |
| ENSG00000237380 | HOXD-AS2      | 0.65 | -1.53 | -0.62 | 2.41E-03 | -3.12E+01 | 3.12E+01 |
| ENSG00000140688 | C16orf58      | 1.28 | 1.28  | 0.35  | 1.68E-03 | 3.12E+01  | 3.12E+01 |
| ENSG00000013441 | CLK1          | 0.77 | -1.31 | -0.38 | 1.75E-03 | -3.12E+01 | 3.12E+01 |
| ENSG00000090661 | CERS4         | 1.48 | 1.48  | 0.57  | 2.26E-03 | 3.11E+01  | 3.11E+01 |
| ENSG00000204852 | TCTN1         | 1.26 | 1.26  | 0.33  | 1.64E-03 | 3.11E+01  | 3.11E+01 |
| ENSG00000107338 | SHB           | 1.34 | 1.34  | 0.42  | 1.85E-03 | 3.11E+01  | 3.11E+01 |
| ENSG00000122591 | FAM126A       | 1.31 | 1.31  | 0.39  | 1.79E-03 | 3.11E+01  | 3.11E+01 |
| ENSG00000022556 | NLRP2         | 0.69 | -1.45 | -0.54 | 2.18E-03 | -3.11E+01 | 3.11E+01 |
| ENSG00000204525 | HLA-C         | 1.28 | 1.28  | 0.36  | 1.71E-03 | 3.10E+01  | 3.10E+01 |
| ENSG00000121104 | FAM117A       | 0.74 | -1.35 | -0.43 | 1.89E-03 | -3.10E+01 | 3.10E+01 |
| ENSG00000067829 | IDH3G         | 0.79 | -1.27 | -0.34 | 1.68E-03 | -3.09E+01 | 3.09E+01 |
| ENSG00000151553 | FAM160B1      | 1.28 | 1.28  | 0.35  | 1.70E-03 | 3.09E+01  | 3.09E+01 |
| ENSG00000213397 | HAUS7         | 0.63 | -1.60 | -0.68 | 2.68E-03 | -3.09E+01 | 3.09E+01 |
| ENSG00000129562 | DAD1          | 1.29 | 1.29  | 0.36  | 1.74E-03 | 3.09E+01  | 3.09E+01 |
| ENSG00000165282 | PIGO          | 0.77 | -1.31 | -0.38 | 1.79E-03 | -3.09E+01 | 3.09E+01 |
| ENSG00000110013 | SIAE          | 1.27 | 1.27  | 0.34  | 1.69E-03 | 3.09E+01  | 3.09E+01 |
| ENSG00000100714 | MTHFD1        | 0.76 | -1.31 | -0.39 | 1.80E-03 | -3.09E+01 | 3.09E+01 |
| ENSG00000020577 | SAMD4A        | 1.27 | 1.27  | 0.35  | 1.71E-03 | 3.08E+01  | 3.08E+01 |

|                 |               |      |       |       |          |           |          |
|-----------------|---------------|------|-------|-------|----------|-----------|----------|
| ENSG00000177432 | NAP1L5        | 0.76 | -1.31 | -0.39 | 1.80E-03 | -3.08E+01 | 3.08E+01 |
| ENSG00000109390 | NDUFC1        | 0.77 | -1.29 | -0.37 | 1.77E-03 | -3.08E+01 | 3.08E+01 |
| ENSG00000047932 | GOPC          | 1.27 | 1.27  | 0.34  | 1.71E-03 | 3.07E+01  | 3.07E+01 |
|                 | RP11-701H24.2 | 1.43 | 1.43  | 0.51  | 2.16E-03 | 3.07E+01  | 3.07E+01 |
| ENSG00000138182 | KIF20B        | 0.76 | -1.32 | -0.40 | 1.85E-03 | -3.06E+01 | 3.06E+01 |
| ENSG00000152291 | TGOLN2        | 1.29 | 1.29  | 0.36  | 1.76E-03 | 3.06E+01  | 3.06E+01 |
| ENSG00000100612 | DHRS7         | 0.79 | -1.26 | -0.34 | 1.71E-03 | -3.06E+01 | 3.06E+01 |
| ENSG00000100105 | PATZ1         | 0.78 | -1.28 | -0.35 | 1.75E-03 | -3.05E+01 | 3.05E+01 |
| ENSG00000182004 | SNRPE         | 0.76 | -1.31 | -0.39 | 1.85E-03 | -3.05E+01 | 3.05E+01 |
| ENSG00000146587 | RBAK          | 1.40 | 1.40  | 0.48  | 2.10E-03 | 3.05E+01  | 3.05E+01 |
| ENSG00000133142 | TCEAL4        | 0.77 | -1.29 | -0.37 | 1.81E-03 | -3.04E+01 | 3.04E+01 |
| ENSG00000198231 | DDX42         | 0.78 | -1.28 | -0.36 | 1.78E-03 | -3.04E+01 | 3.04E+01 |
| ENSG00000160917 | CPSF4         | 0.79 | -1.26 | -0.34 | 1.73E-03 | -3.03E+01 | 3.03E+01 |
| ENSG00000117385 | LEPRE1        | 1.29 | 1.29  | 0.36  | 1.81E-03 | 3.03E+01  | 3.03E+01 |
| ENSG00000022840 | RNF10         | 1.29 | 1.29  | 0.37  | 1.82E-03 | 3.03E+01  | 3.03E+01 |
| ENSG00000173926 | MARCH3        | 0.79 | -1.27 | -0.34 | 1.76E-03 | -3.03E+01 | 3.03E+01 |
| ENSG00000176619 | LMNB2         | 0.78 | -1.29 | -0.36 | 1.81E-03 | -3.02E+01 | 3.02E+01 |
| ENSG00000183665 | TRMT12        | 0.77 | -1.30 | -0.38 | 1.85E-03 | -3.02E+01 | 3.02E+01 |
| ENSG00000166925 | TSC22D4       | 1.27 | 1.27  | 0.34  | 1.77E-03 | 3.01E+01  | 3.01E+01 |
| ENSG00000189339 | SLC35E2B      | 1.26 | 1.26  | 0.34  | 1.77E-03 | 3.01E+01  | 3.01E+01 |
| ENSG00000001561 | ENPP4         | 0.72 | -1.39 | -0.48 | 2.15E-03 | -3.01E+01 | 3.01E+01 |
| ENSG00000035403 | VCL           | 1.29 | 1.29  | 0.37  | 1.85E-03 | 3.00E+01  | 3.00E+01 |
| ENSG00000166436 | TRIM66        | 1.43 | 1.43  | 0.52  | 2.27E-03 | 3.00E+01  | 3.00E+01 |
| ENSG00000239713 | APOBEC3G      | 1.39 | 1.39  | 0.47  | 2.13E-03 | 3.00E+01  | 3.00E+01 |
| ENSG00000130816 | DNMT1         | 0.73 | -1.38 | -0.46 | 2.11E-03 | -3.00E+01 | 3.00E+01 |
| ENSG00000237765 | FAM200B       | 1.27 | 1.27  | 0.34  | 1.80E-03 | 2.99E+01  | 2.99E+01 |
| ENSG00000264885 | RP11-815I9.4  | 1.58 | 1.58  | 0.66  | 2.80E-03 | 2.99E+01  | 2.99E+01 |
| ENSG00000175806 | MSRA          | 1.29 | 1.29  | 0.36  | 1.86E-03 | 2.99E+01  | 2.99E+01 |
| ENSG00000165169 | DYNLT3        | 1.32 | 1.32  | 0.41  | 1.97E-03 | 2.99E+01  | 2.99E+01 |
| ENSG00000105708 | ZNF14         | 1.42 | 1.42  | 0.51  | 2.27E-03 | 2.98E+01  | 2.98E+01 |
| ENSG00000089916 | GPATCH2L      | 1.26 | 1.26  | 0.34  | 1.82E-03 | 2.97E+01  | 2.97E+01 |
| ENSG00000148908 | RGS10         | 1.26 | 1.26  | 0.33  | 1.80E-03 | 2.96E+01  | 2.96E+01 |
| ENSG00000154553 | PDLIM3        | 0.79 | -1.27 | -0.35 | 1.85E-03 | -2.96E+01 | 2.96E+01 |
| ENSG00000100354 | TNRC6B        | 1.27 | 1.27  | 0.35  | 1.86E-03 | 2.96E+01  | 2.96E+01 |
| ENSG00000165819 | METTL3        | 0.79 | -1.27 | -0.34 | 1.84E-03 | -2.95E+01 | 2.95E+01 |
| ENSG00000155962 | CLIC2         | 0.60 | -1.66 | -0.73 | 3.18E-03 | -2.95E+01 | 2.95E+01 |
| ENSG00000204209 | DAXX          | 1.29 | 1.29  | 0.37  | 1.92E-03 | 2.94E+01  | 2.94E+01 |
| ENSG00000155380 | SLC16A1       | 0.78 | -1.28 | -0.36 | 1.91E-03 | -2.94E+01 | 2.94E+01 |
| ENSG00000234449 | RP11-706O15.3 | 1.41 | 1.41  | 0.49  | 2.31E-03 | 2.93E+01  | 2.93E+01 |
| ENSG00000160211 | G6PD          | 0.79 | -1.26 | -0.34 | 1.86E-03 | -2.93E+01 | 2.93E+01 |
|                 | RP11-304L19.5 | 0.67 | -1.48 | -0.57 | 2.57E-03 | -2.93E+01 | 2.93E+01 |
| ENSG00000022976 | ZNF839        | 1.34 | 1.34  | 0.43  | 2.11E-03 | 2.93E+01  | 2.93E+01 |
| ENSG00000090273 | NUDC          | 1.28 | 1.28  | 0.36  | 1.92E-03 | 2.92E+01  | 2.92E+01 |
| ENSG00000136527 | TRA2B         | 0.78 | -1.28 | -0.36 | 1.92E-03 | -2.92E+01 | 2.92E+01 |
| ENSG00000128699 | ORMDL1        | 0.78 | -1.28 | -0.35 | 1.91E-03 | -2.92E+01 | 2.92E+01 |
| ENSG00000138750 | NUP54         | 0.78 | -1.28 | -0.36 | 1.93E-03 | -2.92E+01 | 2.92E+01 |
| ENSG00000185825 | BCAP31        | 1.27 | 1.27  | 0.35  | 1.91E-03 | 2.91E+01  | 2.91E+01 |
| ENSG00000104714 | ERICH1        | 1.36 | 1.36  | 0.45  | 2.19E-03 | 2.91E+01  | 2.91E+01 |
| ENSG00000106546 | AHR           | 1.28 | 1.28  | 0.35  | 1.93E-03 | 2.91E+01  | 2.91E+01 |
| ENSG00000171421 | MRPL36        | 0.79 | -1.26 | -0.34 | 1.89E-03 | -2.90E+01 | 2.90E+01 |
| ENSG00000155100 | OTUD6B        | 0.79 | -1.27 | -0.35 | 1.93E-03 | -2.90E+01 | 2.90E+01 |
| ENSG00000205885 | C1RL-AS1      | 1.46 | 1.46  | 0.54  | 2.53E-03 | 2.90E+01  | 2.90E+01 |
| ENSG00000130640 | TUBGCP2       | 1.29 | 1.29  | 0.36  | 1.98E-03 | 2.89E+01  | 2.89E+01 |
| ENSG00000160972 | PPP1R16A      | 0.78 | -1.28 | -0.36 | 1.97E-03 | -2.89E+01 | 2.89E+01 |
| ENSG00000105726 | ATP13A1       | 1.47 | 1.47  | 0.56  | 2.58E-03 | 2.89E+01  | 2.89E+01 |
| ENSG00000075131 | TIPIN         | 0.79 | -1.27 | -0.35 | 1.94E-03 | -2.89E+01 | 2.89E+01 |
| ENSG00000106080 | FKBP14        | 0.78 | -1.29 | -0.36 | 1.99E-03 | -2.89E+01 | 2.89E+01 |
| ENSG00000109113 | RAB34         | 0.78 | -1.27 | -0.35 | 1.96E-03 | -2.88E+01 | 2.88E+01 |
| ENSG00000078401 | EDN1          | 0.77 | -1.29 | -0.37 | 2.03E-03 | -2.87E+01 | 2.87E+01 |
| ENSG00000177853 | ZNF518A       | 1.55 | 1.55  | 0.63  | 2.91E-03 | 2.86E+01  | 2.86E+01 |
| ENSG00000154727 | GABPA         | 1.45 | 1.45  | 0.53  | 2.56E-03 | 2.86E+01  | 2.86E+01 |
| ENSG00000162645 | GBP2          | 0.79 | -1.27 | -0.34 | 1.97E-03 | -2.86E+01 | 2.86E+01 |
| ENSG00000140299 | BNIP2         | 1.32 | 1.32  | 0.40  | 2.13E-03 | 2.86E+01  | 2.86E+01 |
| ENSG00000128266 | GNAZ          | 1.59 | 1.59  | 0.67  | 3.11E-03 | 2.85E+01  | 2.85E+01 |
| ENSG00000077782 | FGFR1         | 1.28 | 1.28  | 0.36  | 2.02E-03 | 2.85E+01  | 2.85E+01 |
| ENSG00000135924 | DNAJB2        | 1.27 | 1.27  | 0.34  | 1.97E-03 | 2.85E+01  | 2.85E+01 |
| ENSG00000117751 | PPP1R8        | 0.79 | -1.27 | -0.34 | 1.98E-03 | -2.85E+01 | 2.85E+01 |
| ENSG00000169188 | APEX2         | 0.78 | -1.29 | -0.36 | 2.06E-03 | -2.84E+01 | 2.84E+01 |
| ENSG00000134313 | KIDINS220     | 1.28 | 1.28  | 0.36  | 2.04E-03 | 2.84E+01  | 2.84E+01 |
| ENSG00000238961 | SNORA47       | 0.60 | -1.68 | -0.75 | 3.51E-03 | -2.83E+01 | 2.83E+01 |
| ENSG00000168884 | TNIP2         | 0.80 | -1.26 | -0.33 | 1.97E-03 | -2.83E+01 | 2.83E+01 |
| ENSG00000171163 | ZNF692        | 0.77 | -1.30 | -0.38 | 2.12E-03 | -2.83E+01 | 2.83E+01 |
| ENSG00000166166 | TRMT61A       | 0.76 | -1.31 | -0.39 | 2.17E-03 | -2.82E+01 | 2.82E+01 |
| ENSG00000019485 | PRDM11        | 1.36 | 1.36  | 0.45  | 2.33E-03 | 2.82E+01  | 2.82E+01 |
| ENSG00000088876 | ZNF343        | 0.78 | -1.29 | -0.36 | 2.08E-03 | -2.82E+01 | 2.82E+01 |
| ENSG00000141562 | NARF          | 1.26 | 1.26  | 0.33  | 2.00E-03 | 2.82E+01  | 2.82E+01 |
| ENSG00000114744 | COMMD2        | 0.79 | -1.26 | -0.33 | 2.01E-03 | -2.81E+01 | 2.81E+01 |
| ENSG00000137207 | YIPF3         | 1.29 | 1.29  | 0.37  | 2.12E-03 | 2.81E+01  | 2.81E+01 |
| ENSG00000186889 | TMEM17        | 0.64 | -1.55 | -0.63 | 3.05E-03 | -2.81E+01 | 2.81E+01 |

|                 |              |      |       |       |          |           |          |
|-----------------|--------------|------|-------|-------|----------|-----------|----------|
| ENSG00000069974 | RAB27A       | 0.77 | -1.30 | -0.38 | 2.15E-03 | -2.80E+01 | 2.80E+01 |
| ENSG00000142864 | SERBP1       | 0.79 | -1.27 | -0.35 | 2.06E-03 | -2.80E+01 | 2.80E+01 |
| ENSG00000186716 | BCR          | 1.32 | 1.32  | 0.40  | 2.21E-03 | 2.80E+01  | 2.80E+01 |
| ENSG00000022267 | FHL1         | 1.27 | 1.27  | 0.34  | 2.05E-03 | 2.80E+01  | 2.80E+01 |
| ENSG00000106554 | CHCHD3       | 0.79 | -1.27 | -0.34 | 2.05E-03 | -2.80E+01 | 2.80E+01 |
| ENSG00000109180 | OCLAD1       | 1.29 | 1.29  | 0.36  | 2.12E-03 | 2.79E+01  | 2.79E+01 |
| ENSG00000142039 | CCDC97       | 0.76 | -1.32 | -0.40 | 2.22E-03 | -2.79E+01 | 2.79E+01 |
| ENSG00000091651 | ORC6         | 0.80 | -1.26 | -0.33 | 2.03E-03 | -2.79E+01 | 2.79E+01 |
| ENSG00000224167 | RP3-522D1.1  | 0.74 | -1.35 | -0.44 | 2.36E-03 | -2.79E+01 | 2.79E+01 |
| ENSG00000260196 | RP1-239B22.5 | 0.71 | -1.41 | -0.50 | 2.57E-03 | -2.79E+01 | 2.79E+01 |
| ENSG00000196417 | ZNF765       | 1.33 | 1.33  | 0.41  | 2.28E-03 | 2.78E+01  | 2.78E+01 |
| ENSG00000057294 | PKP2         | 1.36 | 1.36  | 0.44  | 2.37E-03 | 2.78E+01  | 2.78E+01 |
| ENSG00000120159 | CAAP1        | 0.78 | -1.28 | -0.36 | 2.12E-03 | -2.78E+01 | 2.78E+01 |
| ENSG00000116497 | S100PBP      | 1.25 | 1.25  | 0.33  | 2.04E-03 | 2.78E+01  | 2.78E+01 |
| ENSG00000180357 | ZNF609       | 1.29 | 1.29  | 0.37  | 2.16E-03 | 2.78E+01  | 2.78E+01 |
| ENSG00000093217 | XYLB         | 0.69 | -1.44 | -0.53 | 2.71E-03 | -2.77E+01 | 2.77E+01 |
| ENSG00000143514 | TP53BP2      | 1.26 | 1.26  | 0.34  | 2.09E-03 | 2.77E+01  | 2.77E+01 |
| ENSG00000099901 | RANBP1       | 0.79 | -1.27 | -0.35 | 2.12E-03 | -2.76E+01 | 2.76E+01 |
| ENSG00000111845 | PAK1IP1      | 0.80 | -1.26 | -0.33 | 2.07E-03 | -2.76E+01 | 2.76E+01 |
| ENSG00000101193 | GID8         | 1.25 | 1.25  | 0.33  | 2.06E-03 | 2.76E+01  | 2.76E+01 |
| ENSG00000108819 | PPP1R9B      | 1.26 | 1.26  | 0.33  | 2.08E-03 | 2.75E+01  | 2.75E+01 |
| ENSG00000042445 | RETSAT       | 0.80 | -1.25 | -0.33 | 2.07E-03 | -2.75E+01 | 2.75E+01 |
| ENSG00000200959 | SNORA74A     | 0.70 | -1.42 | -0.51 | 2.68E-03 | -2.75E+01 | 2.75E+01 |
| ENSG00000068366 | ACSL4        | 1.39 | 1.39  | 0.48  | 2.57E-03 | 2.75E+01  | 2.75E+01 |
| ENSG00000120156 | TEK          | 0.78 | -1.28 | -0.35 | 2.15E-03 | -2.75E+01 | 2.75E+01 |
| ENSG00000169242 | EFNA1        | 1.27 | 1.27  | 0.35  | 2.15E-03 | 2.75E+01  | 2.75E+01 |
| ENSG00000185875 | THNSL1       | 1.34 | 1.34  | 0.43  | 2.39E-03 | 2.75E+01  | 2.75E+01 |
| ENSG00000249242 | TMEM150C     | 0.69 | -1.45 | -0.54 | 2.78E-03 | -2.75E+01 | 2.75E+01 |
| ENSG00000103264 | FBXO31       | 1.28 | 1.28  | 0.36  | 2.18E-03 | 2.74E+01  | 2.74E+01 |
| ENSG00000165055 | METTL2B      | 0.79 | -1.26 | -0.33 | 2.12E-03 | -2.74E+01 | 2.74E+01 |
| ENSG00000113140 | SPARC        | 1.28 | 1.28  | 0.35  | 2.17E-03 | 2.74E+01  | 2.74E+01 |
| ENSG00000113068 | PFDN1        | 1.27 | 1.27  | 0.34  | 2.15E-03 | 2.74E+01  | 2.74E+01 |
| ENSG00000184840 | TMED9        | 0.76 | -1.31 | -0.39 | 2.31E-03 | -2.73E+01 | 2.73E+01 |
| ENSG00000166965 | RCCD1        | 0.75 | -1.32 | -0.41 | 2.35E-03 | -2.73E+01 | 2.73E+01 |
| ENSG00000156140 | ADAMTS3      | 1.45 | 1.45  | 0.53  | 2.83E-03 | 2.72E+01  | 2.72E+01 |
| ENSG00000146350 | C6orf170     | 1.42 | 1.42  | 0.50  | 2.72E-03 | 2.72E+01  | 2.72E+01 |
| ENSG00000140006 | WDR89        | 0.76 | -1.32 | -0.40 | 2.37E-03 | -2.72E+01 | 2.72E+01 |
| ENSG00000160953 | MUM1         | 1.26 | 1.26  | 0.33  | 2.14E-03 | 2.71E+01  | 2.71E+01 |
| ENSG00000155542 | SETD9        | 0.77 | -1.30 | -0.37 | 2.29E-03 | -2.71E+01 | 2.71E+01 |
| ENSG00000175105 | ZNF654       | 1.42 | 1.42  | 0.51  | 2.75E-03 | 2.71E+01  | 2.71E+01 |
| ENSG00000101928 | MOSPD1       | 1.27 | 1.27  | 0.34  | 2.21E-03 | 2.70E+01  | 2.70E+01 |
| ENSG00000168275 | COA6         | 0.77 | -1.30 | -0.38 | 2.32E-03 | -2.70E+01 | 2.70E+01 |
| ENSG00000151240 | DIP2C        | 1.30 | 1.30  | 0.38  | 2.32E-03 | 2.70E+01  | 2.70E+01 |
| ENSG00000105223 | PLD3         | 1.32 | 1.32  | 0.40  | 2.41E-03 | 2.68E+01  | 2.68E+01 |
| ENSG00000178031 | ADAMTSL1     | 0.77 | -1.30 | -0.38 | 2.35E-03 | -2.68E+01 | 2.68E+01 |
| ENSG00000115970 | THADA        | 0.80 | -1.25 | -0.33 | 2.19E-03 | -2.67E+01 | 2.67E+01 |
| ENSG00000137710 | RDX          | 1.34 | 1.34  | 0.43  | 2.54E-03 | 2.67E+01  | 2.67E+01 |
| ENSG00000067900 | ROCK1        | 1.42 | 1.42  | 0.51  | 2.83E-03 | 2.67E+01  | 2.67E+01 |
| ENSG00000123416 | TUBA1B       | 0.78 | -1.28 | -0.35 | 2.30E-03 | -2.66E+01 | 2.66E+01 |
| ENSG00000103319 | EEF2K        | 0.76 | -1.32 | -0.40 | 2.47E-03 | -2.66E+01 | 2.66E+01 |
| ENSG00000138496 | PARP9        | 0.79 | -1.27 | -0.34 | 2.28E-03 | -2.66E+01 | 2.66E+01 |
| ENSG00000112984 | KIF20A       | 0.77 | -1.30 | -0.38 | 2.39E-03 | -2.66E+01 | 2.66E+01 |
| ENSG00000117139 | KDM5B        | 1.28 | 1.28  | 0.36  | 2.33E-03 | 2.65E+01  | 2.65E+01 |
| ENSG00000197083 | ZNF300P1     | 0.62 | -1.61 | -0.69 | 3.69E-03 | -2.65E+01 | 2.65E+01 |
| ENSG00000181481 | RNF135       | 1.29 | 1.29  | 0.36  | 2.36E-03 | 2.65E+01  | 2.65E+01 |
| ENSG00000147996 | CBWD5        | 0.68 | -1.47 | -0.55 | 3.06E-03 | -2.65E+01 | 2.65E+01 |
| ENSG00000166441 | RPL27A       | 0.76 | -1.31 | -0.39 | 2.44E-03 | -2.65E+01 | 2.65E+01 |
| ENSG00000176142 | TMEM39A      | 0.79 | -1.27 | -0.34 | 2.29E-03 | -2.65E+01 | 2.65E+01 |
| ENSG00000164941 | INTS8        | 1.29 | 1.29  | 0.36  | 2.36E-03 | 2.65E+01  | 2.65E+01 |
| ENSG00000164252 | AGGF1        | 1.29 | 1.29  | 0.36  | 2.36E-03 | 2.65E+01  | 2.65E+01 |
| ENSG00000121964 | GTDC1        | 0.79 | -1.26 | -0.33 | 2.28E-03 | -2.64E+01 | 2.64E+01 |
| ENSG00000125945 | ZNF436       | 1.25 | 1.25  | 0.32  | 2.25E-03 | 2.64E+01  | 2.64E+01 |
| ENSG00000204219 | TCEA3        | 0.65 | -1.55 | -0.63 | 3.45E-03 | -2.63E+01 | 2.63E+01 |
| ENSG00000177732 | SOX12        | 1.32 | 1.32  | 0.40  | 2.53E-03 | 2.62E+01  | 2.62E+01 |
| ENSG00000185088 | RPS27L       | 1.32 | 1.32  | 0.41  | 2.56E-03 | 2.62E+01  | 2.62E+01 |
| ENSG00000108984 | MAP2K6       | 0.79 | -1.27 | -0.34 | 2.35E-03 | -2.62E+01 | 2.62E+01 |
| ENSG00000119950 | MXI1         | 1.31 | 1.31  | 0.39  | 2.52E-03 | 2.62E+01  | 2.62E+01 |
| ENSG00000164466 | SFXN1        | 0.79 | -1.27 | -0.34 | 2.34E-03 | -2.61E+01 | 2.61E+01 |
| ENSG00000136521 | NDUFB5       | 0.78 | -1.27 | -0.35 | 2.38E-03 | -2.61E+01 | 2.61E+01 |
| ENSG00000089682 | RBM41        | 1.32 | 1.32  | 0.40  | 2.54E-03 | 2.61E+01  | 2.61E+01 |
| ENSG00000103343 | ZNF174       | 1.35 | 1.35  | 0.43  | 2.68E-03 | 2.61E+01  | 2.61E+01 |
| ENSG00000139793 | MBNL2        | 1.36 | 1.36  | 0.45  | 2.73E-03 | 2.60E+01  | 2.60E+01 |
| ENSG00000138640 | FAM13A       | 0.78 | -1.28 | -0.36 | 2.41E-03 | -2.60E+01 | 2.60E+01 |
| ENSG00000221944 | TIGD1        | 1.32 | 1.32  | 0.40  | 2.58E-03 | 2.60E+01  | 2.60E+01 |
| ENSG00000196793 | ZNF239       | 0.66 | -1.51 | -0.59 | 3.38E-03 | -2.59E+01 | 2.59E+01 |
| ENSG00000169714 | CNBP         | 0.78 | -1.28 | -0.35 | 2.43E-03 | -2.59E+01 | 2.59E+01 |
| ENSG00000175426 | PCSK1        | 0.74 | -1.35 | -0.44 | 2.75E-03 | -2.58E+01 | 2.58E+01 |
| ENSG00000130723 | PRRC2B       | 1.32 | 1.32  | 0.40  | 2.61E-03 | 2.58E+01  | 2.58E+01 |
| ENSG00000153201 | RANBP2       | 1.54 | 1.54  | 0.63  | 3.58E-03 | 2.58E+01  | 2.58E+01 |

|                 |               |      |       |       |          |           |          |
|-----------------|---------------|------|-------|-------|----------|-----------|----------|
| ENSG00000258297 | RP11-658F2.8  | 0.76 | -1.31 | -0.39 | 2.60E-03 | -2.57E+01 | 2.57E+01 |
| ENSG00000177464 | GPR4          | 1.32 | 1.32  | 0.40  | 2.64E-03 | 2.57E+01  | 2.57E+01 |
| ENSG00000076685 | NT5C2         | 1.29 | 1.29  | 0.37  | 2.52E-03 | 2.57E+01  | 2.57E+01 |
| ENSG00000275714 | HIST1H3A      | 0.78 | -1.28 | -0.36 | 2.48E-03 | -2.57E+01 | 2.57E+01 |
| ENSG00000197971 | MBP           | 1.28 | 1.28  | 0.35  | 2.48E-03 | 2.56E+01  | 2.56E+01 |
| ENSG00000163950 | SLBP          | 0.78 | -1.28 | -0.35 | 2.49E-03 | -2.56E+01 | 2.56E+01 |
| ENSG00000138629 | UBL7          | 1.25 | 1.25  | 0.32  | 2.38E-03 | 2.55E+01  | 2.55E+01 |
| ENSG00000112977 | DAP           | 1.27 | 1.27  | 0.34  | 2.47E-03 | 2.55E+01  | 2.55E+01 |
| ENSG00000227077 | AC107983.4    | 0.75 | -1.33 | -0.41 | 2.73E-03 | -2.54E+01 | 2.54E+01 |
| ENSG00000100206 | DMC1          | 1.54 | 1.54  | 0.62  | 3.66E-03 | 2.54E+01  | 2.54E+01 |
| ENSG00000178685 | PARP10        | 0.77 | -1.30 | -0.38 | 2.61E-03 | -2.54E+01 | 2.54E+01 |
| ENSG00000269044 | CTC-429P9.3   | 0.66 | -1.52 | -0.60 | 3.59E-03 | -2.53E+01 | 2.53E+01 |
| ENSG00000152422 | XRCC4         | 0.74 | -1.36 | -0.44 | 2.87E-03 | -2.53E+01 | 2.53E+01 |
| ENSG00000160201 | U2AF1         | 0.77 | -1.30 | -0.38 | 2.65E-03 | -2.53E+01 | 2.53E+01 |
| ENSG00000204590 | GNL1          | 0.79 | -1.27 | -0.35 | 2.54E-03 | -2.52E+01 | 2.52E+01 |
| ENSG00000198889 | DCAF12L1      | 0.71 | -1.41 | -0.50 | 3.15E-03 | -2.52E+01 | 2.52E+01 |
| ENSG00000054598 | FOXC1         | 0.78 | -1.29 | -0.36 | 2.63E-03 | -2.51E+01 | 2.51E+01 |
| ENSG00000162613 | FUBP1         | 0.79 | -1.27 | -0.35 | 2.57E-03 | -2.51E+01 | 2.51E+01 |
| ENSG00000168994 | PXDC1         | 1.26 | 1.26  | 0.33  | 2.53E-03 | 2.51E+01  | 2.51E+01 |
|                 | AC009336.24   | 1.36 | 1.36  | 0.44  | 2.94E-03 | 2.51E+01  | 2.51E+01 |
| ENSG00000152284 | TCF7L1        | 1.54 | 1.54  | 0.62  | 3.76E-03 | 2.51E+01  | 2.51E+01 |
| ENSG00000117155 | SSX2IP        | 0.77 | -1.30 | -0.38 | 2.69E-03 | -2.50E+01 | 2.50E+01 |
| ENSG00000023572 | GLRX2         | 0.75 | -1.34 | -0.42 | 2.87E-03 | -2.50E+01 | 2.50E+01 |
| ENSG00000276963 | RP11-318K12.1 | 1.42 | 1.42  | 0.51  | 3.22E-03 | 2.50E+01  | 2.50E+01 |
| ENSG00000178397 | FAM220A       | 1.27 | 1.27  | 0.34  | 2.57E-03 | 2.50E+01  | 2.50E+01 |
| ENSG00000147894 | C9orf72       | 1.28 | 1.28  | 0.35  | 2.62E-03 | 2.50E+01  | 2.50E+01 |
| ENSG00000135940 | COX5B         | 0.78 | -1.29 | -0.36 | 2.65E-03 | -2.50E+01 | 2.50E+01 |
| ENSG00000108557 | RAI1          | 1.27 | 1.27  | 0.35  | 2.60E-03 | 2.49E+01  | 2.49E+01 |
| ENSG00000175073 | VCPIP1        | 1.34 | 1.34  | 0.42  | 2.88E-03 | 2.49E+01  | 2.49E+01 |
| ENSG00000114541 | FRMD4B        | 1.28 | 1.28  | 0.35  | 2.62E-03 | 2.49E+01  | 2.49E+01 |
| ENSG00000141034 | GID4          | 1.26 | 1.26  | 0.34  | 2.58E-03 | 2.49E+01  | 2.49E+01 |
| ENSG00000142459 | EVI5L         | 1.28 | 1.28  | 0.36  | 2.67E-03 | 2.48E+01  | 2.48E+01 |
| ENSG00000058453 | CROCC         | 0.78 | -1.28 | -0.35 | 2.64E-03 | -2.48E+01 | 2.48E+01 |
| ENSG00000102921 | N4BP1         | 1.26 | 1.26  | 0.34  | 2.58E-03 | 2.48E+01  | 2.48E+01 |
| ENSG00000138658 | C4orf21       | 0.73 | -1.36 | -0.45 | 3.03E-03 | -2.48E+01 | 2.48E+01 |
| ENSG00000104341 | LAPTM4B       | 0.79 | -1.27 | -0.34 | 2.61E-03 | -2.48E+01 | 2.48E+01 |
| ENSG00000160410 | SHKBP1        | 1.25 | 1.25  | 0.32  | 2.55E-03 | 2.47E+01  | 2.47E+01 |
| ENSG00000198901 | PRC1          | 0.78 | -1.28 | -0.36 | 2.71E-03 | -2.47E+01 | 2.47E+01 |
| ENSG00000100852 | ARHGAP5       | 1.45 | 1.45  | 0.53  | 3.44E-03 | 2.47E+01  | 2.47E+01 |
| ENSG00000197779 | ZNF81         | 1.28 | 1.28  | 0.36  | 2.71E-03 | 2.47E+01  | 2.47E+01 |
| ENSG00000197121 | PGAP1         | 0.74 | -1.35 | -0.43 | 3.00E-03 | -2.46E+01 | 2.46E+01 |
| ENSG00000134901 | KDELC1        | 0.78 | -1.29 | -0.36 | 2.74E-03 | -2.46E+01 | 2.46E+01 |
| ENSG00000138411 | HECW2         | 1.27 | 1.27  | 0.34  | 2.66E-03 | 2.45E+01  | 2.45E+01 |
| ENSG00000140471 | LINS          | 0.79 | -1.27 | -0.34 | 2.67E-03 | -2.45E+01 | 2.45E+01 |
| ENSG00000123178 | SPRYD7        | 0.76 | -1.32 | -0.40 | 2.88E-03 | -2.45E+01 | 2.45E+01 |
| ENSG00000187653 | TMSB4XP8      | 0.74 | -1.35 | -0.43 | 3.03E-03 | -2.44E+01 | 2.44E+01 |
| ENSG00000130764 | LRRC47        | 1.25 | 1.25  | 0.32  | 2.62E-03 | 2.44E+01  | 2.44E+01 |
| ENSG00000119669 | IRF2BPL       | 1.26 | 1.26  | 0.33  | 2.66E-03 | 2.44E+01  | 2.44E+01 |
| ENSG00000121579 | NAA50         | 0.79 | -1.27 | -0.34 | 2.70E-03 | -2.44E+01 | 2.44E+01 |
| ENSG00000183935 | HTR7P1        | 1.26 | 1.26  | 0.34  | 2.69E-03 | 2.44E+01  | 2.44E+01 |
| ENSG00000169062 | UPF3A         | 0.77 | -1.31 | -0.39 | 2.88E-03 | -2.43E+01 | 2.43E+01 |
| ENSG00000233276 | GPX1          | 0.77 | -1.29 | -0.37 | 2.83E-03 | -2.43E+01 | 2.43E+01 |
| ENSG00000092853 | CLSPN         | 0.80 | -1.25 | -0.32 | 2.64E-03 | -2.43E+01 | 2.43E+01 |
| ENSG00000114850 | SSR3          | 1.29 | 1.29  | 0.36  | 2.80E-03 | 2.43E+01  | 2.43E+01 |
| ENSG0000010017  | RANBP9        | 1.25 | 1.25  | 0.32  | 2.65E-03 | 2.43E+01  | 2.43E+01 |
| ENSG00000136371 | MTHFS         | 0.62 | -1.63 | -0.70 | 4.47E-03 | -2.43E+01 | 2.43E+01 |
| ENSG00000158716 | DUSP23        | 0.80 | -1.25 | -0.32 | 2.62E-03 | -2.43E+01 | 2.43E+01 |
| ENSG00000073849 | ST6GAL1       | 0.79 | -1.27 | -0.35 | 2.75E-03 | -2.43E+01 | 2.43E+01 |
|                 | RP11-159F24.1 | 1.42 | 1.42  | 0.51  | 3.45E-03 | 2.42E+01  | 2.42E+01 |
| ENSG00000166387 | PPFIBP2       | 0.66 | -1.51 | -0.59 | 3.88E-03 | -2.42E+01 | 2.42E+01 |
| ENSG00000095139 | ARCN1         | 1.27 | 1.27  | 0.35  | 2.75E-03 | 2.42E+01  | 2.42E+01 |
| ENSG00000148516 | ZEB1          | 1.40 | 1.40  | 0.49  | 3.36E-03 | 2.42E+01  | 2.42E+01 |
| ENSG00000204438 | GPANK1        | 1.28 | 1.28  | 0.35  | 2.79E-03 | 2.42E+01  | 2.42E+01 |
| ENSG00000005059 | CCDC109B      | 0.80 | -1.26 | -0.33 | 2.71E-03 | -2.41E+01 | 2.41E+01 |
| ENSG00000131236 | CAP1          | 1.27 | 1.27  | 0.34  | 2.77E-03 | 2.40E+01  | 2.40E+01 |
| ENSG00000200913 | SNORD46       | 0.62 | -1.62 | -0.70 | 4.54E-03 | -2.40E+01 | 2.40E+01 |
| ENSG00000167645 | YIF1B         | 0.80 | -1.25 | -0.32 | 2.70E-03 | -2.40E+01 | 2.40E+01 |
| ENSG00000168038 | ULK4          | 1.28 | 1.28  | 0.36  | 2.85E-03 | 2.40E+01  | 2.40E+01 |
| ENSG00000166529 | ZSCAN21       | 0.77 | -1.29 | -0.37 | 2.91E-03 | -2.40E+01 | 2.40E+01 |
| ENSG00000177683 | THAP5         | 1.29 | 1.29  | 0.37  | 2.90E-03 | 2.39E+01  | 2.39E+01 |
| ENSG00000143952 | VPS54         | 0.79 | -1.26 | -0.33 | 2.78E-03 | -2.39E+01 | 2.39E+01 |
| ENSG00000189337 | KAZN          | 0.65 | -1.53 | -0.61 | 4.10E-03 | -2.39E+01 | 2.39E+01 |
| ENSG00000061676 | NCKAP1        | 1.34 | 1.34  | 0.43  | 3.16E-03 | 2.39E+01  | 2.39E+01 |
| ENSG00000159111 | MRPL10        | 1.34 | 1.34  | 0.42  | 3.14E-03 | 2.38E+01  | 2.38E+01 |
| ENSG00000100906 | NFKBIA        | 0.78 | -1.28 | -0.36 | 2.89E-03 | -2.38E+01 | 2.38E+01 |
| ENSG00000239096 | snoU13        | 1.40 | 1.40  | 0.49  | 3.48E-03 | 2.38E+01  | 2.38E+01 |
| ENSG00000197050 | ZNF420        | 1.40 | 1.40  | 0.49  | 3.46E-03 | 2.38E+01  | 2.38E+01 |
| ENSG00000170248 | PDCD6IP       | 1.27 | 1.27  | 0.35  | 2.86E-03 | 2.38E+01  | 2.38E+01 |
| ENSG00000132471 | WBP2          | 1.38 | 1.38  | 0.46  | 3.36E-03 | 2.38E+01  | 2.38E+01 |

|                 |                   |      |       |       |          |           |          |
|-----------------|-------------------|------|-------|-------|----------|-----------|----------|
| ENSG00000053747 | LAMA3             | 1.32 | 1.32  | 0.40  | 3.07E-03 | 2.38E+01  | 2.38E+01 |
| ENSG00000116761 | CTH               | 0.63 | -1.60 | -0.68 | 4.54E-03 | -2.37E+01 | 2.37E+01 |
| ENSG00000101347 | SAMHD1            | 0.80 | -1.25 | -0.33 | 2.79E-03 | -2.37E+01 | 2.37E+01 |
| ENSG00000182749 | PAQR7             | 0.76 | -1.31 | -0.39 | 3.07E-03 | -2.37E+01 | 2.37E+01 |
| ENSG00000119640 | ACYP1             | 0.77 | -1.30 | -0.37 | 3.00E-03 | -2.37E+01 | 2.37E+01 |
| ENSG00000133574 | GIMAP4            | 0.78 | -1.27 | -0.35 | 2.90E-03 | -2.37E+01 | 2.37E+01 |
| ENSG00000114735 | HEMK1             | 1.26 | 1.26  | 0.33  | 2.83E-03 | 2.36E+01  | 2.36E+01 |
| ENSG00000108510 | MED13             | 1.32 | 1.32  | 0.40  | 3.10E-03 | 2.36E+01  | 2.36E+01 |
| ENSG00000196455 | PIK3R4            | 1.25 | 1.25  | 0.32  | 2.80E-03 | 2.36E+01  | 2.36E+01 |
| ENSG00000162729 | IGSF8             | 1.31 | 1.31  | 0.39  | 3.09E-03 | 2.36E+01  | 2.36E+01 |
| ENSG00000135363 | LMO2              | 1.26 | 1.26  | 0.33  | 2.86E-03 | 2.36E+01  | 2.36E+01 |
| ENSG00000197951 | ZNF71             | 1.27 | 1.27  | 0.35  | 2.93E-03 | 2.36E+01  | 2.36E+01 |
| ENSG00000164151 | KIAA0947          | 1.27 | 1.27  | 0.35  | 2.92E-03 | 2.35E+01  | 2.35E+01 |
| ENSG00000008086 | CDKL5             | 1.45 | 1.45  | 0.53  | 3.79E-03 | 2.35E+01  | 2.35E+01 |
|                 | RP11-206L10.11    | 1.36 | 1.36  | 0.44  | 3.33E-03 | 2.35E+01  | 2.35E+01 |
| ENSG00000104129 | DNAJC17           | 0.78 | -1.28 | -0.36 | 2.97E-03 | -2.35E+01 | 2.35E+01 |
| ENSG00000239779 | WBP1              | 1.43 | 1.43  | 0.51  | 3.71E-03 | 2.34E+01  | 2.34E+01 |
| ENSG00000138443 | ABI2              | 0.79 | -1.26 | -0.34 | 2.91E-03 | -2.34E+01 | 2.34E+01 |
| ENSG00000183828 | NUDT14            | 0.78 | -1.28 | -0.35 | 2.97E-03 | -2.34E+01 | 2.34E+01 |
| ENSG00000145391 | SETD7             | 1.29 | 1.29  | 0.37  | 3.03E-03 | 2.34E+01  | 2.34E+01 |
| ENSG00000198961 | PJA2              | 1.36 | 1.36  | 0.45  | 3.39E-03 | 2.34E+01  | 2.34E+01 |
| ENSG00000120533 | ENY2              | 0.78 | -1.28 | -0.35 | 2.98E-03 | -2.34E+01 | 2.34E+01 |
| ENSG00000225470 | JPX               | 0.79 | -1.26 | -0.34 | 2.91E-03 | -2.34E+01 | 2.34E+01 |
| ENSG00000107551 | RASSF4            | 0.75 | -1.34 | -0.42 | 3.26E-03 | -2.34E+01 | 2.34E+01 |
| ENSG00000145623 | OSMR              | 0.79 | -1.27 | -0.35 | 2.95E-03 | -2.34E+01 | 2.34E+01 |
| ENSG00000164934 | DCAF13            | 0.78 | -1.28 | -0.36 | 3.00E-03 | -2.34E+01 | 2.34E+01 |
| ENSG00000095906 | NUBP2             | 0.79 | -1.26 | -0.33 | 2.90E-03 | -2.34E+01 | 2.34E+01 |
| ENSG00000224032 | EPB41L4A-AS1      | 0.76 | -1.31 | -0.39 | 3.13E-03 | -2.34E+01 | 2.34E+01 |
| ENSG00000116044 | NFE2L2            | 1.38 | 1.38  | 0.47  | 3.51E-03 | 2.33E+01  | 2.33E+01 |
| ENSG00000146143 | PRIM2             | 0.80 | -1.24 | -0.32 | 2.84E-03 | -2.33E+01 | 2.33E+01 |
| ENSG00000204632 | HLA-G             | 1.40 | 1.40  | 0.48  | 3.58E-03 | 2.33E+01  | 2.33E+01 |
| ENSG00000204261 | XXbac-BPG246D15.8 | 0.68 | -1.47 | -0.56 | 4.01E-03 | -2.33E+01 | 2.33E+01 |
| ENSG00000067248 | DHX29             | 1.37 | 1.37  | 0.45  | 3.46E-03 | 2.33E+01  | 2.33E+01 |
| ENSG00000163319 | MRPS18C           | 0.78 | -1.28 | -0.36 | 3.06E-03 | -2.32E+01 | 2.32E+01 |
| ENSG00000170089 | RP11-423H2.1      | 0.74 | -1.35 | -0.44 | 3.40E-03 | -2.32E+01 | 2.32E+01 |
| ENSG00000116260 | QSOX1             | 1.36 | 1.36  | 0.44  | 3.42E-03 | 2.32E+01  | 2.32E+01 |
| ENSG00000215386 | LINC00478         | 0.76 | -1.32 | -0.40 | 3.22E-03 | -2.32E+01 | 2.32E+01 |
| ENSG00000115207 | GTF3C2            | 0.80 | -1.25 | -0.32 | 2.90E-03 | -2.32E+01 | 2.32E+01 |
| ENSG00000156469 | MTERFD1           | 0.80 | -1.26 | -0.33 | 2.95E-03 | -2.32E+01 | 2.32E+01 |
| ENSG00000112655 | PTK7              | 0.78 | -1.28 | -0.35 | 3.04E-03 | -2.31E+01 | 2.31E+01 |
| ENSG00000169155 | ZBTB43            | 1.27 | 1.27  | 0.34  | 3.00E-03 | 2.31E+01  | 2.31E+01 |
| ENSG00000121210 | KIAA0922          | 1.27 | 1.27  | 0.35  | 3.04E-03 | 2.31E+01  | 2.31E+01 |
| ENSG00000137497 | NUMA1             | 1.30 | 1.30  | 0.38  | 3.17E-03 | 2.31E+01  | 2.31E+01 |
| ENSG00000161638 | ITGA5             | 1.34 | 1.34  | 0.43  | 3.40E-03 | 2.30E+01  | 2.30E+01 |
| ENSG00000120656 | TAF12             | 1.25 | 1.25  | 0.32  | 2.93E-03 | 2.30E+01  | 2.30E+01 |
| ENSG00000162063 | CCNF              | 0.77 | -1.30 | -0.38 | 3.20E-03 | -2.30E+01 | 2.30E+01 |
| ENSG00000173349 | SFT2D3            | 0.77 | -1.30 | -0.38 | 3.20E-03 | -2.30E+01 | 2.30E+01 |
| ENSG00000196912 | ANKRD36B          | 1.44 | 1.44  | 0.52  | 3.90E-03 | 2.30E+01  | 2.30E+01 |
|                 | RP11-475N22.4     | 1.30 | 1.30  | 0.38  | 3.21E-03 | 2.30E+01  | 2.30E+01 |
| ENSG00000005436 | GCFC2             | 0.80 | -1.25 | -0.32 | 2.96E-03 | -2.29E+01 | 2.29E+01 |
| ENSG00000173221 | GLRX              | 0.78 | -1.29 | -0.36 | 3.14E-03 | -2.29E+01 | 2.29E+01 |
| ENSG00000111581 | NUP107            | 0.78 | -1.28 | -0.36 | 3.12E-03 | -2.29E+01 | 2.29E+01 |
| ENSG00000175893 | ZDHHC21           | 1.34 | 1.34  | 0.43  | 3.44E-03 | 2.29E+01  | 2.29E+01 |
| ENSG00000065183 | WDR3              | 0.79 | -1.26 | -0.33 | 3.04E-03 | -2.28E+01 | 2.28E+01 |
| ENSG00000105865 | DUS4L             | 1.31 | 1.31  | 0.39  | 3.30E-03 | 2.28E+01  | 2.28E+01 |
| ENSG00000114127 | XRN1              | 1.39 | 1.39  | 0.48  | 3.71E-03 | 2.28E+01  | 2.28E+01 |
| ENSG00000241839 | PLEKHO2           | 1.25 | 1.25  | 0.32  | 2.99E-03 | 2.28E+01  | 2.28E+01 |
| ENSG00000196526 | AFAP1             | 1.33 | 1.33  | 0.42  | 3.43E-03 | 2.28E+01  | 2.28E+01 |
| ENSG00000166477 | LEO1              | 0.79 | -1.26 | -0.33 | 3.06E-03 | -2.28E+01 | 2.28E+01 |
| ENSG00000137806 | NDUFAF1           | 0.80 | -1.25 | -0.33 | 3.03E-03 | -2.28E+01 | 2.28E+01 |
| ENSG00000125691 | RPL23             | 0.79 | -1.27 | -0.35 | 3.12E-03 | -2.28E+01 | 2.28E+01 |
| ENSG00000137845 | ADAM10            | 1.35 | 1.35  | 0.44  | 3.53E-03 | 2.28E+01  | 2.28E+01 |
| ENSG00000166704 | ZNF606            | 1.29 | 1.29  | 0.37  | 3.22E-03 | 2.27E+01  | 2.27E+01 |
| ENSG00000240429 | LRRFIP1P1         | 1.51 | 1.51  | 0.59  | 4.42E-03 | 2.27E+01  | 2.27E+01 |
| ENSG00000166226 | CCT2              | 0.79 | -1.26 | -0.34 | 3.12E-03 | -2.26E+01 | 2.26E+01 |
| ENSG00000232063 | RP11-307E17.8     | 1.48 | 1.48  | 0.57  | 4.30E-03 | 2.26E+01  | 2.26E+01 |
| ENSG00000188997 | KCTD21            | 1.29 | 1.29  | 0.37  | 3.27E-03 | 2.26E+01  | 2.26E+01 |
| ENSG00000137656 | BUD13             | 0.80 | -1.24 | -0.31 | 3.04E-03 | -2.25E+01 | 2.25E+01 |
| ENSG00000204463 | BAG6              | 1.32 | 1.32  | 0.40  | 3.41E-03 | 2.25E+01  | 2.25E+01 |
| ENSG00000116396 | KCNC4             | 1.26 | 1.26  | 0.33  | 3.12E-03 | 2.25E+01  | 2.25E+01 |
| ENSG00000197093 | GAL3ST4           | 1.56 | 1.56  | 0.64  | 4.78E-03 | 2.25E+01  | 2.25E+01 |
| ENSG00000108582 | CPD               | 1.26 | 1.26  | 0.34  | 3.18E-03 | 2.24E+01  | 2.24E+01 |
| ENSG00000136425 | CIB2              | 0.72 | -1.39 | -0.48 | 3.87E-03 | -2.24E+01 | 2.24E+01 |
| ENSG00000171475 | WIPF2             | 0.78 | -1.28 | -0.35 | 3.25E-03 | -2.24E+01 | 2.24E+01 |
| ENSG00000148429 | USP6NL            | 1.25 | 1.25  | 0.32  | 3.13E-03 | 2.24E+01  | 2.24E+01 |
| ENSG00000212747 | FAM127C           | 1.29 | 1.29  | 0.37  | 3.34E-03 | 2.23E+01  | 2.23E+01 |
| ENSG00000140025 | EFCAB11           | 1.30 | 1.30  | 0.38  | 3.42E-03 | 2.23E+01  | 2.23E+01 |
| ENSG00000179627 | ZBTB42            | 0.70 | -1.43 | -0.52 | 4.13E-03 | -2.23E+01 | 2.23E+01 |
| ENSG00000147383 | NSDHL             | 0.78 | -1.29 | -0.36 | 3.35E-03 | -2.23E+01 | 2.23E+01 |

|                  |                   |      |       |       |          |           |          |
|------------------|-------------------|------|-------|-------|----------|-----------|----------|
| ENSG00000103932  | RPAP1             | 1.32 | 1.32  | 0.40  | 3.55E-03 | 2.22E+01  | 2.22E+01 |
| ENSG00000140950  | KIAA1609          | 1.24 | 1.24  | 0.31  | 3.12E-03 | 2.22E+01  | 2.22E+01 |
| ENSG00000162961  | DPY30             | 0.80 | -1.25 | -0.32 | 3.17E-03 | -2.22E+01 | 2.22E+01 |
| ENSG00000186073  | C15orf41          | 0.77 | -1.30 | -0.38 | 3.44E-03 | -2.22E+01 | 2.22E+01 |
| ENSG00000165672  | PRDX3             | 0.79 | -1.26 | -0.33 | 3.24E-03 | -2.22E+01 | 2.22E+01 |
| ENSG00000150347  | ARID5B            | 0.77 | -1.29 | -0.37 | 3.43E-03 | -2.21E+01 | 2.21E+01 |
| ENSG00000078124  | ACER3             | 1.26 | 1.26  | 0.33  | 3.25E-03 | 2.21E+01  | 2.21E+01 |
| ENSG00000140259  | MFAP1             | 0.81 | -1.24 | -0.31 | 3.16E-03 | -2.21E+01 | 2.21E+01 |
| ENSG00000169727  | GPS1              | 0.80 | -1.26 | -0.33 | 3.26E-03 | -2.20E+01 | 2.20E+01 |
| ENSG00000100099  | HPS4              | 1.26 | 1.26  | 0.33  | 3.27E-03 | 2.20E+01  | 2.20E+01 |
| ENSG00000041802  | LSG1              | 1.27 | 1.27  | 0.34  | 3.31E-03 | 2.20E+01  | 2.20E+01 |
| ENSG00000129933  | MAU2              | 1.25 | 1.25  | 0.33  | 3.25E-03 | 2.20E+01  | 2.20E+01 |
| ENSG00000116750  | UCHL5             | 0.79 | -1.26 | -0.34 | 3.30E-03 | -2.20E+01 | 2.20E+01 |
| ENSG00000175602  | CCDC85B           | 0.77 | -1.30 | -0.37 | 3.48E-03 | -2.20E+01 | 2.20E+01 |
| ENSG00000106484  | MEST              | 0.76 | -1.31 | -0.39 | 3.56E-03 | -2.20E+01 | 2.20E+01 |
| ENSG00000181610  | MRPS23            | 0.80 | -1.24 | -0.32 | 3.22E-03 | -2.19E+01 | 2.19E+01 |
| ENSG00000071537  | SEL1L             | 1.26 | 1.26  | 0.33  | 3.31E-03 | 2.19E+01  | 2.19E+01 |
| ENSG00000104728  | ARHGEF10          | 1.25 | 1.25  | 0.32  | 3.25E-03 | 2.19E+01  | 2.19E+01 |
| ENSG00000229729  | RP11-159G9.5      | 1.44 | 1.44  | 0.52  | 4.31E-03 | 2.19E+01  | 2.19E+01 |
| ENSG00000121289  | CEP89             | 1.27 | 1.27  | 0.35  | 3.38E-03 | 2.19E+01  | 2.19E+01 |
| ENSG00000100504  | PYGL              | 1.31 | 1.31  | 0.39  | 3.62E-03 | 2.18E+01  | 2.18E+01 |
| ENSG00000118707  | TGIF2             | 1.26 | 1.26  | 0.33  | 3.34E-03 | 2.18E+01  | 2.18E+01 |
| ENSG00000113532  | ST8SIA4           | 1.30 | 1.30  | 0.38  | 3.59E-03 | 2.18E+01  | 2.18E+01 |
| ENSG00000164512  | ANKRD55           | 0.69 | -1.44 | -0.53 | 4.40E-03 | -2.18E+01 | 2.18E+01 |
| ENSG00000068323  | TFE3              | 1.25 | 1.25  | 0.33  | 3.31E-03 | 2.18E+01  | 2.18E+01 |
| ENSG00000129680  | MAP7D3            | 1.26 | 1.26  | 0.33  | 3.34E-03 | 2.18E+01  | 2.18E+01 |
| ENSG00000163349  | HIPK1             | 1.27 | 1.27  | 0.34  | 3.40E-03 | 2.17E+01  | 2.17E+01 |
| ENSG00000198792  | TMEM184B          | 1.26 | 1.26  | 0.33  | 3.36E-03 | 2.17E+01  | 2.17E+01 |
| ENSG00000060237  | WNK1              | 1.28 | 1.28  | 0.36  | 3.49E-03 | 2.17E+01  | 2.17E+01 |
| ENSG00000187953  | PMS2CL            | 1.29 | 1.29  | 0.37  | 3.56E-03 | 2.17E+01  | 2.17E+01 |
| ENSG00000006634  | DBF4              | 0.79 | -1.26 | -0.34 | 3.41E-03 | -2.16E+01 | 2.16E+01 |
| ENSG00000116991  | SIPA1L2           | 1.27 | 1.27  | 0.34  | 3.44E-03 | 2.16E+01  | 2.16E+01 |
| ENSG00000196712  | NF1               | 1.25 | 1.25  | 0.32  | 3.34E-03 | 2.16E+01  | 2.16E+01 |
| ENSG00000261188  | CTA-445C9.14      | 0.63 | -1.59 | -0.67 | 5.40E-03 | -2.16E+01 | 2.16E+01 |
| ENSG00000119326  | CTNNA1            | 0.74 | -1.36 | -0.44 | 3.95E-03 | -2.16E+01 | 2.16E+01 |
| ENSG00000109079  | TNFAIP1           | 1.29 | 1.29  | 0.36  | 3.57E-03 | 2.16E+01  | 2.16E+01 |
| ENSG00000124380  | SNRNP27           | 0.79 | -1.26 | -0.33 | 3.42E-03 | -2.16E+01 | 2.16E+01 |
| ENSG00000006831  | ADIPOR2           | 0.80 | -1.25 | -0.32 | 3.40E-03 | -2.15E+01 | 2.15E+01 |
| ENSG00000253982  | CTD-2336O2.1      | 1.28 | 1.28  | 0.35  | 3.52E-03 | 2.15E+01  | 2.15E+01 |
| ENSG00000155097  | ATP6V1C1          | 1.26 | 1.26  | 0.34  | 3.45E-03 | 2.15E+01  | 2.15E+01 |
| ENSG00000173273  | TNKS              | 1.25 | 1.25  | 0.32  | 3.38E-03 | 2.15E+01  | 2.15E+01 |
| ENSG00000103423  | DNAJA3            | 0.80 | -1.24 | -0.31 | 3.35E-03 | -2.15E+01 | 2.15E+01 |
| ENSG00000168939  | SPRY3             | 0.68 | -1.48 | -0.57 | 4.76E-03 | -2.15E+01 | 2.15E+01 |
| ENSG00000177706  | FAM20C            | 1.27 | 1.27  | 0.34  | 3.50E-03 | 2.14E+01  | 2.14E+01 |
| ENSG00000102317  | RBM3              | 1.27 | 1.27  | 0.35  | 3.53E-03 | 2.14E+01  | 2.14E+01 |
| ENSG00000187257  | RP11-139H15.1     | 0.73 | -1.37 | -0.45 | 4.09E-03 | -2.14E+01 | 2.14E+01 |
| ENSG00000087076  | RSBN1L            | 0.79 | -1.27 | -0.34 | 3.52E-03 | -2.14E+01 | 2.14E+01 |
| ENSG00000147180  | AC007390.5        | 0.80 | -1.26 | -0.33 | 3.47E-03 | -2.13E+01 | 2.13E+01 |
| ENSG00000166189  | HSD17B14          | 0.75 | -1.34 | -0.42 | 3.95E-03 | -2.13E+01 | 2.13E+01 |
| ENSG00000114779  | ZNF711            | 0.75 | -1.33 | -0.42 | 3.96E-03 | -2.12E+01 | 2.12E+01 |
| ENSG00000225614  | HPS6              | 1.25 | 1.25  | 0.32  | 3.47E-03 | 2.12E+01  | 2.12E+01 |
| ENSG00000143756  | ABHD14B           | 0.78 | -1.29 | -0.36 | 3.70E-03 | -2.12E+01 | 2.12E+01 |
| ENSG00000181929  | ZNF469            | 1.27 | 1.27  | 0.34  | 3.58E-03 | 2.11E+01  | 2.11E+01 |
| ENSG00000119285  | FBXO28            | 1.26 | 1.26  | 0.33  | 3.53E-03 | 2.11E+01  | 2.11E+01 |
| ENSG00000151806  | PRKAG1            | 0.80 | -1.25 | -0.32 | 3.50E-03 | -2.11E+01 | 2.11E+01 |
| ENSG00000106868  | HEATR1            | 0.79 | -1.26 | -0.33 | 3.57E-03 | -2.11E+01 | 2.11E+01 |
| ENSG00000175634  | GUF1              | 1.24 | 1.24  | 0.31  | 3.47E-03 | 2.11E+01  | 2.11E+01 |
| ENSG00000123104  | SUSD1             | 0.79 | -1.26 | -0.33 | 3.60E-03 | -2.10E+01 | 2.10E+01 |
| ENSG00000099804  | RPS6KB2           | 0.81 | -1.24 | -0.31 | 3.51E-03 | -2.09E+01 | 2.09E+01 |
| ENSG00000100490  | ITPR2             | 1.35 | 1.35  | 0.43  | 4.17E-03 | 2.09E+01  | 2.09E+01 |
| ENSG00000168769  | CDC34             | 1.25 | 1.25  | 0.32  | 3.56E-03 | 2.09E+01  | 2.09E+01 |
| ENSG00000197536  | CDKL1             | 0.74 | -1.35 | -0.44 | 4.20E-03 | -2.09E+01 | 2.09E+01 |
| ENSG00000032219  | TET2              | 1.30 | 1.30  | 0.37  | 3.86E-03 | 2.09E+01  | 2.09E+01 |
| ENSG00000262246  | RP1-80B9.2        | 1.48 | 1.48  | 0.57  | 5.05E-03 | 2.09E+01  | 2.09E+01 |
| ENSG00000159917  | C5orf56           | 0.70 | -1.42 | -0.51 | 4.67E-03 | -2.08E+01 | 2.08E+01 |
| ENSG000001207844 | ARID4A            | 1.32 | 1.32  | 0.41  | 4.05E-03 | 2.08E+01  | 2.08E+01 |
| ENSG00000183111  | CORO7             | 1.30 | 1.30  | 0.38  | 3.92E-03 | 2.08E+01  | 2.08E+01 |
| ENSG00000083857  | ZNF235            | 1.41 | 1.41  | 0.49  | 4.58E-03 | 2.08E+01  | 2.08E+01 |
| ENSG00000131899  | AC061975.1        | 0.63 | -1.58 | -0.66 | 5.80E-03 | -2.08E+01 | 2.08E+01 |
| ENSG00000083937  | ARHGEF37          | 1.31 | 1.31  | 0.39  | 3.96E-03 | 2.07E+01  | 2.07E+01 |
| ENSG00000168395  | FAT1              | 0.74 | -1.35 | -0.43 | 4.24E-03 | -2.07E+01 | 2.07E+01 |
| ENSG00000072756  | LLGL1             | 0.81 | -1.24 | -0.31 | 3.58E-03 | -2.07E+01 | 2.07E+01 |
| ENSG00000225914  | CHMP2B            | 1.25 | 1.25  | 0.32  | 3.62E-03 | 2.07E+01  | 2.07E+01 |
| ENSG00000251257  | ING5              | 0.80 | -1.26 | -0.33 | 3.69E-03 | -2.07E+01 | 2.07E+01 |
| ENSG00000147813  | TRNT1             | 0.80 | -1.25 | -0.32 | 3.75E-03 | -2.07E+01 | 2.07E+01 |
| ENSG00000169410  | XXbac-BPG154L12.4 | 1.55 | 1.55  | 0.63  | 5.63E-03 | 2.07E+01  | 2.07E+01 |
| ENSG00000169410  | CTD-2263F21.1     | 1.53 | 1.53  | 0.61  | 5.48E-03 | 2.06E+01  | 2.06E+01 |
| ENSG00000169410  | NAPRT1            | 0.81 | -1.24 | -0.31 | 3.60E-03 | -2.06E+01 | 2.06E+01 |
| ENSG00000169410  | PTPN9             | 1.25 | 1.25  | 0.32  | 3.68E-03 | 2.06E+01  | 2.06E+01 |

|                  |               |      |       |       |          |           |          |
|------------------|---------------|------|-------|-------|----------|-----------|----------|
| ENSG00000095209  | TMEM38B       | 0.78 | -1.28 | -0.36 | 3.86E-03 | -2.06E+01 | 2.06E+01 |
| ENSG00000130202  | PVRL2         | 1.29 | 1.29  | 0.37  | 3.94E-03 | 2.06E+01  | 2.06E+01 |
| ENSG00000114126  | TFDP2         | 0.81 | -1.24 | -0.31 | 3.61E-03 | -2.06E+01 | 2.06E+01 |
| ENSG00000149380  | P4HA3         | 1.25 | 1.25  | 0.33  | 3.73E-03 | 2.05E+01  | 2.05E+01 |
| ENSG00000177169  | ULK1          | 1.29 | 1.29  | 0.37  | 3.94E-03 | 2.05E+01  | 2.05E+01 |
| ENSG00000175106  | FAM18B2       | 0.71 | -1.40 | -0.49 | 4.66E-03 | -2.05E+01 | 2.05E+01 |
| ENSG00000164105  | SAP30         | 0.81 | -1.24 | -0.31 | 3.66E-03 | -2.05E+01 | 2.05E+01 |
| ENSG00000001084  | GCLC          | 0.81 | -1.24 | -0.31 | 3.64E-03 | -2.05E+01 | 2.05E+01 |
|                  | FLJ14082      | 1.44 | 1.44  | 0.53  | 4.94E-03 | 2.05E+01  | 2.05E+01 |
| ENSG00000099341  | PSMD8         | 0.80 | -1.25 | -0.33 | 3.74E-03 | -2.05E+01 | 2.05E+01 |
| ENSG00000181638  | ZFP41         | 1.35 | 1.35  | 0.43  | 4.34E-03 | 2.05E+01  | 2.05E+01 |
| ENSG00000164989  | CCDC171       | 1.39 | 1.39  | 0.48  | 4.62E-03 | 2.05E+01  | 2.05E+01 |
| ENSG00000189298  | ZKSCAN3       | 1.33 | 1.33  | 0.41  | 4.21E-03 | 2.05E+01  | 2.05E+01 |
| ENSG00000102900  | NUP93         | 0.79 | -1.26 | -0.33 | 3.79E-03 | -2.05E+01 | 2.05E+01 |
| ENSG00000111490  | TBC1D30       | 0.79 | -1.27 | -0.34 | 3.82E-03 | -2.05E+01 | 2.05E+01 |
| ENSG00000178105  | DDX10         | 0.80 | -1.25 | -0.32 | 3.74E-03 | -2.05E+01 | 2.05E+01 |
| ENSG00000166788  | SAAL1         | 0.81 | -1.24 | -0.31 | 3.65E-03 | -2.05E+01 | 2.05E+01 |
| ENSG00000090470  | PDCD7         | 0.79 | -1.26 | -0.33 | 3.78E-03 | -2.05E+01 | 2.05E+01 |
| ENSG00000176101  | SSNA1         | 0.79 | -1.26 | -0.33 | 3.79E-03 | -2.05E+01 | 2.05E+01 |
| ENSG00000170340  | B3GNT2        | 0.80 | -1.24 | -0.31 | 3.70E-03 | -2.05E+01 | 2.05E+01 |
| ENSG00000159792  | PSKH1         | 0.78 | -1.28 | -0.36 | 3.95E-03 | -2.04E+01 | 2.04E+01 |
| ENSG00000172053  | QARS          | 0.79 | -1.26 | -0.33 | 3.80E-03 | -2.04E+01 | 2.04E+01 |
| ENSG00000115084  | SLC35F5       | 1.25 | 1.25  | 0.32  | 3.75E-03 | 2.04E+01  | 2.04E+01 |
| ENSG00000118482  | PHF3          | 1.45 | 1.45  | 0.54  | 5.10E-03 | 2.04E+01  | 2.04E+01 |
| ENSG00000132613  | MTSS1L        | 1.26 | 1.26  | 0.33  | 3.80E-03 | 2.04E+01  | 2.04E+01 |
| ENSG00000078070  | MCCC1         | 0.80 | -1.24 | -0.32 | 3.74E-03 | -2.04E+01 | 2.04E+01 |
| ENSG000000253190 | AC084082.3    | 0.62 | -1.61 | -0.69 | 6.25E-03 | -2.03E+01 | 2.03E+01 |
| ENSG00000167912  | RP11-25K19.1  | 0.74 | -1.36 | -0.44 | 4.48E-03 | -2.03E+01 | 2.03E+01 |
| ENSG00000109066  | TMEM104       | 1.27 | 1.27  | 0.34  | 3.89E-03 | 2.03E+01  | 2.03E+01 |
| ENSG00000067064  | IDI1          | 0.79 | -1.26 | -0.34 | 3.89E-03 | -2.03E+01 | 2.03E+01 |
| ENSG00000176826  | FKBP9L        | 1.45 | 1.45  | 0.54  | 5.13E-03 | 2.03E+01  | 2.03E+01 |
| ENSG00000198363  | ASP           | 1.26 | 1.26  | 0.33  | 3.85E-03 | 2.03E+01  | 2.03E+01 |
| ENSG00000109265  | KIAA1211      | 1.34 | 1.34  | 0.43  | 4.41E-03 | 2.02E+01  | 2.02E+01 |
| ENSG00000146701  | MDH2          | 1.28 | 1.28  | 0.35  | 3.99E-03 | 2.02E+01  | 2.02E+01 |
| ENSG00000131469  | RPL27         | 0.77 | -1.30 | -0.38 | 4.18E-03 | -2.02E+01 | 2.02E+01 |
| ENSG00000125375  | ATP5S         | 0.75 | -1.33 | -0.41 | 4.31E-03 | -2.02E+01 | 2.02E+01 |
| ENSG00000275835  | TUBGCP5       | 0.81 | -1.24 | -0.31 | 3.78E-03 | -2.02E+01 | 2.02E+01 |
| ENSG00000083750  | RRAGB         | 1.27 | 1.27  | 0.34  | 3.96E-03 | 2.01E+01  | 2.01E+01 |
| ENSG00000213995  | CARKD         | 0.80 | -1.25 | -0.32 | 3.84E-03 | -2.01E+01 | 2.01E+01 |
| ENSG00000147010  | SH3KBP1       | 0.81 | -1.24 | -0.31 | 3.78E-03 | -2.01E+01 | 2.01E+01 |
| ENSG00000146802  | TMEM168       | 0.78 | -1.28 | -0.35 | 4.03E-03 | -2.01E+01 | 2.01E+01 |
| ENSG00000165802  | NELF          | 1.23 | 1.23  | 0.30  | 3.78E-03 | 2.01E+01  | 2.01E+01 |
| ENSG00000108639  | SYNGR2        | 1.25 | 1.25  | 0.32  | 3.86E-03 | 2.01E+01  | 2.01E+01 |
| ENSG00000158796  | DEDD          | 0.81 | -1.24 | -0.31 | 3.80E-03 | -2.01E+01 | 2.01E+01 |
| ENSG00000102977  | ACD           | 0.79 | -1.26 | -0.33 | 3.95E-03 | -2.01E+01 | 2.01E+01 |
| ENSG00000074201  | CLNS1A        | 0.80 | -1.25 | -0.33 | 3.92E-03 | -2.00E+01 | 2.00E+01 |
| ENSG00000131504  | DIAPH1        | 0.79 | -1.27 | -0.34 | 4.01E-03 | -2.00E+01 | 2.00E+01 |
| ENSG00000141858  | SAMD1         | 0.79 | -1.26 | -0.33 | 3.96E-03 | -2.00E+01 | 2.00E+01 |
| ENSG00000172123  | SLFN12        | 0.80 | -1.25 | -0.32 | 3.90E-03 | -2.00E+01 | 2.00E+01 |
| ENSG00000149809  | TM7SF2        | 0.63 | -1.60 | -0.68 | 6.41E-03 | -2.00E+01 | 2.00E+01 |
| ENSG00000162076  | FLYWCH2       | 0.80 | -1.25 | -0.33 | 3.96E-03 | -1.99E+01 | 1.99E+01 |
| ENSG00000066117  | SMARCD1       | 1.28 | 1.28  | 0.36  | 4.15E-03 | 1.99E+01  | 1.99E+01 |
| ENSG00000104529  | EEF1D         | 0.80 | -1.25 | -0.33 | 3.98E-03 | -1.99E+01 | 1.99E+01 |
| ENSG00000196209  | SIRPB2        | 0.67 | -1.48 | -0.57 | 5.56E-03 | -1.99E+01 | 1.99E+01 |
| ENSG00000156970  | BUB1B         | 0.78 | -1.28 | -0.36 | 4.17E-03 | -1.98E+01 | 1.98E+01 |
| ENSG00000169519  | METTL15       | 0.80 | -1.26 | -0.33 | 4.05E-03 | -1.97E+01 | 1.97E+01 |
| ENSG00000144401  | METTL21A      | 0.78 | -1.28 | -0.35 | 4.19E-03 | -1.97E+01 | 1.97E+01 |
| ENSG00000184481  | FOXO4         | 0.75 | -1.33 | -0.41 | 4.60E-03 | -1.96E+01 | 1.96E+01 |
| ENSG00000197345  | MRPL21        | 0.80 | -1.25 | -0.32 | 4.09E-03 | -1.96E+01 | 1.96E+01 |
| ENSG00000265666  | CTD-2267D19.2 | 0.70 | -1.44 | -0.52 | 5.43E-03 | -1.95E+01 | 1.95E+01 |
| ENSG00000226871  | AC135178.1    | 1.39 | 1.39  | 0.47  | 5.05E-03 | 1.95E+01  | 1.95E+01 |
| ENSG00000129007  | CALML4        | 0.75 | -1.34 | -0.42 | 4.73E-03 | -1.95E+01 | 1.95E+01 |
| ENSG00000140395  | WDR61         | 0.80 | -1.24 | -0.31 | 4.07E-03 | -1.95E+01 | 1.95E+01 |
| ENSG00000149089  | APIP          | 0.81 | -1.24 | -0.31 | 4.07E-03 | -1.95E+01 | 1.95E+01 |
| ENSG00000163938  | GNL3          | 0.80 | -1.26 | -0.33 | 4.19E-03 | -1.94E+01 | 1.94E+01 |
| ENSG00000115841  | FAM82A1       | 1.37 | 1.37  | 0.46  | 4.98E-03 | 1.94E+01  | 1.94E+01 |
| ENSG00000178951  | ZBTB7A        | 1.34 | 1.34  | 0.42  | 4.75E-03 | 1.94E+01  | 1.94E+01 |
| ENSG00000065970  | FOXJ2         | 1.36 | 1.36  | 0.44  | 4.92E-03 | 1.94E+01  | 1.94E+01 |
| ENSG00000169239  | CA5B          | 0.77 | -1.30 | -0.38 | 4.53E-03 | -1.93E+01 | 1.93E+01 |
| ENSG00000175746  | C15orf54      | 1.40 | 1.40  | 0.49  | 5.27E-03 | 1.93E+01  | 1.93E+01 |
| ENSG00000075336  | TIMM21        | 0.81 | -1.24 | -0.31 | 4.10E-03 | -1.93E+01 | 1.93E+01 |
| ENSG00000162512  | SDC3          | 1.26 | 1.26  | 0.33  | 4.26E-03 | 1.93E+01  | 1.93E+01 |
| ENSG00000076650  | GPATCH1       | 0.78 | -1.28 | -0.35 | 4.40E-03 | -1.93E+01 | 1.93E+01 |
| ENSG00000164815  | ORC5          | 1.24 | 1.24  | 0.31  | 4.14E-03 | 1.93E+01  | 1.93E+01 |
| ENSG00000197808  | ZNF461        | 1.31 | 1.31  | 0.39  | 4.67E-03 | 1.92E+01  | 1.92E+01 |
| ENSG00000137804  | NUSAP1        | 0.77 | -1.29 | -0.37 | 4.53E-03 | -1.92E+01 | 1.92E+01 |
| ENSG00000273611  | ZNHIT3        | 0.80 | -1.25 | -0.33 | 4.25E-03 | -1.92E+01 | 1.92E+01 |
| ENSG00000147457  | CHMP7         | 0.81 | -1.24 | -0.31 | 4.16E-03 | -1.92E+01 | 1.92E+01 |
| ENSG00000254986  | DPP3          | 1.23 | 1.23  | 0.30  | 4.12E-03 | 1.92E+01  | 1.92E+01 |

|                  |               |      |       |       |          |           |          |
|------------------|---------------|------|-------|-------|----------|-----------|----------|
| ENSG00000110921  | MVK           | 0.81 | -1.24 | -0.31 | 4.18E-03 | -1.92E+01 | 1.92E+01 |
| ENSG00000154380  | ENAH          | 0.80 | -1.25 | -0.32 | 4.26E-03 | -1.92E+01 | 1.92E+01 |
| ENSG00000104472  | CHRAC1        | 0.79 | -1.26 | -0.34 | 4.34E-03 | -1.92E+01 | 1.92E+01 |
| ENSG00000213588  | ZBTB9         | 0.78 | -1.27 | -0.35 | 4.45E-03 | -1.91E+01 | 1.91E+01 |
| ENSG00000178585  | CTNNBIP1      | 1.24 | 1.24  | 0.31  | 4.19E-03 | 1.91E+01  | 1.91E+01 |
| ENSG00000138834  | MAPK8IP3      | 1.23 | 1.23  | 0.30  | 4.17E-03 | 1.91E+01  | 1.91E+01 |
| ENSG00000198542  | ITGBL1        | 1.31 | 1.31  | 0.39  | 4.75E-03 | 1.91E+01  | 1.91E+01 |
| ENSG00000147854  | UHRF2         | 0.80 | -1.26 | -0.33 | 4.34E-03 | -1.91E+01 | 1.91E+01 |
| ENSG00000158560  | DYNC1I1       | 0.67 | -1.49 | -0.58 | 6.11E-03 | -1.91E+01 | 1.91E+01 |
| ENSG00000170946  | DNAJC24       | 0.79 | -1.26 | -0.33 | 4.36E-03 | -1.90E+01 | 1.90E+01 |
| ENSG00000105339  | DENND3        | 1.24 | 1.24  | 0.31  | 4.24E-03 | 1.90E+01  | 1.90E+01 |
| ENSG00000168003  | SLC3A2        | 1.26 | 1.26  | 0.33  | 4.35E-03 | 1.90E+01  | 1.90E+01 |
| ENSG00000132612  | VPS4A         | 0.80 | -1.24 | -0.31 | 4.28E-03 | -1.90E+01 | 1.90E+01 |
| ENSG00000167693  | NXN           | 0.81 | -1.24 | -0.31 | 4.25E-03 | -1.90E+01 | 1.90E+01 |
| ENSG00000162650  | ATXN7L2       | 0.68 | -1.47 | -0.55 | 5.97E-03 | -1.90E+01 | 1.90E+01 |
| ENSG00000102098  | SCML2         | 0.72 | -1.40 | -0.48 | 5.42E-03 | -1.90E+01 | 1.90E+01 |
| ENSG00000155561  | NUP205        | 0.79 | -1.26 | -0.33 | 4.42E-03 | -1.89E+01 | 1.89E+01 |
| ENSG00000142156  | COL6A1        | 1.36 | 1.36  | 0.45  | 5.19E-03 | 1.89E+01  | 1.89E+01 |
| ENSG00000204186  | ZDBF2         | 1.39 | 1.39  | 0.47  | 5.38E-03 | 1.89E+01  | 1.89E+01 |
| ENSG00000229117  | RPL41         | 0.79 | -1.27 | -0.35 | 4.55E-03 | -1.89E+01 | 1.89E+01 |
| ENSG00000114166  | KAT2B         | 1.24 | 1.24  | 0.31  | 4.33E-03 | 1.89E+01  | 1.89E+01 |
| ENSG00000213741  | RPS29         | 0.73 | -1.36 | -0.45 | 5.22E-03 | -1.89E+01 | 1.89E+01 |
| ENSG00000196510  | ANAPC7        | 0.80 | -1.24 | -0.32 | 4.35E-03 | -1.89E+01 | 1.89E+01 |
| ENSG00000140563  | MCTP2         | 0.68 | -1.47 | -0.56 | 6.12E-03 | -1.88E+01 | 1.88E+01 |
| ENSG00000099139  | PCSK5         | 1.29 | 1.29  | 0.37  | 4.70E-03 | 1.88E+01  | 1.88E+01 |
| ENSG00000120837  | NFYB          | 1.25 | 1.25  | 0.33  | 4.46E-03 | 1.88E+01  | 1.88E+01 |
| ENSG00000225091  | SNORA71A      | 0.65 | -1.54 | -0.63 | 6.76E-03 | -1.88E+01 | 1.88E+01 |
| ENSG00000071539  | TRIP13        | 0.80 | -1.25 | -0.33 | 4.47E-03 | -1.88E+01 | 1.88E+01 |
| ENSG00000127329  | PTPRB         | 1.27 | 1.27  | 0.34  | 4.59E-03 | 1.87E+01  | 1.87E+01 |
| ENSG00000204344  | STK19         | 1.30 | 1.30  | 0.37  | 4.79E-03 | 1.87E+01  | 1.87E+01 |
| ENSG00000198642  | KLHL9         | 1.26 | 1.26  | 0.33  | 4.54E-03 | 1.87E+01  | 1.87E+01 |
| ENSG00000178718  | RPP25         | 1.24 | 1.24  | 0.31  | 4.42E-03 | 1.87E+01  | 1.87E+01 |
| ENSG00000196505  | GDAP2         | 1.24 | 1.24  | 0.31  | 4.38E-03 | 1.87E+01  | 1.87E+01 |
| ENSG00000174099  | MSRB3         | 0.80 | -1.25 | -0.32 | 4.45E-03 | -1.87E+01 | 1.87E+01 |
| ENSG00000185477  | GPRIN3        | 1.37 | 1.37  | 0.46  | 5.42E-03 | 1.87E+01  | 1.87E+01 |
| ENSG00000198431  | TXNRD1        | 1.26 | 1.26  | 0.33  | 4.54E-03 | 1.87E+01  | 1.87E+01 |
| ENSG00000174606  | ANGEL2        | 1.24 | 1.24  | 0.31  | 4.40E-03 | 1.87E+01  | 1.87E+01 |
| ENSG00000121851  | POLR3GL       | 0.80 | -1.26 | -0.33 | 4.53E-03 | -1.86E+01 | 1.86E+01 |
| ENSG00000233927  | RPS28         | 0.76 | -1.32 | -0.40 | 5.01E-03 | -1.86E+01 | 1.86E+01 |
| ENSG00000166847  | DCTN5         | 1.25 | 1.25  | 0.32  | 4.47E-03 | 1.86E+01  | 1.86E+01 |
| ENSG00000067560  | RHOA          | 1.25 | 1.25  | 0.32  | 4.53E-03 | 1.86E+01  | 1.86E+01 |
| ENSG00000163659  | TIPARP        | 1.26 | 1.26  | 0.33  | 4.56E-03 | 1.86E+01  | 1.86E+01 |
| ENSG00000066777  | ARFGEF1       | 1.33 | 1.33  | 0.41  | 5.13E-03 | 1.86E+01  | 1.86E+01 |
| ENSG00000112701  | SENP6         | 1.27 | 1.27  | 0.35  | 4.71E-03 | 1.86E+01  | 1.86E+01 |
| ENSG00000072042  | RDH11         | 0.80 | -1.25 | -0.32 | 4.56E-03 | -1.85E+01 | 1.85E+01 |
| ENSG00000082258  | CCNT2         | 1.29 | 1.29  | 0.36  | 4.83E-03 | 1.85E+01  | 1.85E+01 |
| ENSG00000188629  | ZNF177        | 1.49 | 1.49  | 0.57  | 6.47E-03 | 1.85E+01  | 1.85E+01 |
| ENSG00000175782  | SLC35E3       | 1.24 | 1.24  | 0.31  | 4.50E-03 | 1.85E+01  | 1.85E+01 |
| ENSG00000125449  | ARMC7         | 1.29 | 1.29  | 0.36  | 4.86E-03 | 1.84E+01  | 1.84E+01 |
| ENSG00000113013  | HSPA9         | 0.80 | -1.25 | -0.32 | 4.60E-03 | -1.84E+01 | 1.84E+01 |
| ENSG00000010810  | FYN           | 1.25 | 1.25  | 0.32  | 4.60E-03 | 1.84E+01  | 1.84E+01 |
| ENSG00000040633  | PHF23         | 0.81 | -1.24 | -0.31 | 4.51E-03 | -1.84E+01 | 1.84E+01 |
| ENSG00000274211  | SOCS7         | 1.32 | 1.32  | 0.40  | 5.17E-03 | 1.84E+01  | 1.84E+01 |
| ENSG00000180822  | PSMG4         | 0.81 | -1.24 | -0.31 | 4.55E-03 | -1.84E+01 | 1.84E+01 |
| ENSG00000084072  | PPIE          | 0.79 | -1.27 | -0.35 | 4.84E-03 | -1.83E+01 | 1.83E+01 |
| ENSG00000139620  | KANSL2        | 0.81 | -1.23 | -0.30 | 4.52E-03 | -1.83E+01 | 1.83E+01 |
| ENSG00000198728  | LDB1          | 1.24 | 1.24  | 0.31  | 4.59E-03 | 1.83E+01  | 1.83E+01 |
| ENSG00000161996  | WDR90         | 0.78 | -1.28 | -0.36 | 4.92E-03 | -1.83E+01 | 1.83E+01 |
| ENSG00000002822  | MAD1L1        | 0.80 | -1.26 | -0.33 | 4.75E-03 | -1.83E+01 | 1.83E+01 |
| ENSG00000258399  | MEG8          | 1.32 | 1.32  | 0.40  | 5.28E-03 | 1.82E+01  | 1.82E+01 |
| ENSG00000198793  | MTOR          | 1.28 | 1.28  | 0.36  | 4.95E-03 | 1.82E+01  | 1.82E+01 |
| ENSG00000180423  | HARBI1        | 1.38 | 1.38  | 0.46  | 5.75E-03 | 1.82E+01  | 1.82E+01 |
| ENSG00000151718  | WWC2          | 1.26 | 1.26  | 0.34  | 4.84E-03 | 1.82E+01  | 1.82E+01 |
| ENSG00000143363  | PRUNE         | 1.28 | 1.28  | 0.35  | 4.95E-03 | 1.81E+01  | 1.81E+01 |
| ENSG00000131149  | GSE1          | 1.38 | 1.38  | 0.47  | 5.82E-03 | 1.81E+01  | 1.81E+01 |
| ENSG00000115760  | BIRC6         | 1.32 | 1.32  | 0.40  | 5.28E-03 | 1.81E+01  | 1.81E+01 |
| ENSG00000137040  | RANBP6        | 1.35 | 1.35  | 0.44  | 5.60E-03 | 1.81E+01  | 1.81E+01 |
| ENSG00000196268  | ZNF493        | 1.29 | 1.29  | 0.36  | 5.08E-03 | 1.80E+01  | 1.80E+01 |
| ENSG00000168672  | FAM84B        | 0.81 | -1.24 | -0.31 | 4.74E-03 | -1.80E+01 | 1.80E+01 |
| ENSG00000035141  | FAM136A       | 0.80 | -1.24 | -0.31 | 4.75E-03 | -1.80E+01 | 1.80E+01 |
| ENSG000000037280 | FLT4          | 0.79 | -1.26 | -0.34 | 4.90E-03 | -1.80E+01 | 1.80E+01 |
| ENSG00000185658  | BRWD1         | 1.36 | 1.36  | 0.44  | 5.68E-03 | 1.80E+01  | 1.80E+01 |
| ENSG00000144395  | CCDC150       | 0.75 | -1.33 | -0.41 | 5.44E-03 | -1.80E+01 | 1.80E+01 |
| ENSG00000144320  | KIAA1715      | 1.25 | 1.25  | 0.33  | 4.86E-03 | 1.80E+01  | 1.80E+01 |
| ENSG00000196177  | ACADSB        | 1.26 | 1.26  | 0.33  | 4.89E-03 | 1.80E+01  | 1.80E+01 |
| ENSG00000068796  | RP11-429G19.2 | 0.75 | -1.33 | -0.41 | 5.47E-03 | -1.79E+01 | 1.79E+01 |
| ENSG00000215717  | KIF2A         | 1.34 | 1.34  | 0.42  | 5.54E-03 | 1.79E+01  | 1.79E+01 |
| ENSG00000105447  | TMEM167B      | 0.80 | -1.24 | -0.32 | 4.81E-03 | -1.79E+01 | 1.79E+01 |
| ENSG00000105447  | GRWD1         | 0.81 | -1.23 | -0.30 | 4.74E-03 | -1.79E+01 | 1.79E+01 |

|                 |              |      |       |       |          |           |          |
|-----------------|--------------|------|-------|-------|----------|-----------|----------|
| ENSG00000196741 | CXorf24      | 1.46 | 1.46  | 0.54  | 6.61E-03 | 1.79E+01  | 1.79E+01 |
| ENSG00000108349 | CASC3        | 0.80 | -1.25 | -0.32 | 4.88E-03 | -1.79E+01 | 1.79E+01 |
| ENSG00000166140 | ZFYVE19      | 1.25 | 1.25  | 0.32  | 4.88E-03 | 1.79E+01  | 1.79E+01 |
| ENSG00000103852 | TTC23        | 0.81 | -1.23 | -0.30 | 4.74E-03 | -1.78E+01 | 1.78E+01 |
| ENSG00000087884 | AAMDC        | 0.80 | -1.25 | -0.32 | 4.88E-03 | -1.78E+01 | 1.78E+01 |
| ENSG00000221978 | CCNL2        | 0.80 | -1.26 | -0.33 | 4.98E-03 | -1.78E+01 | 1.78E+01 |
| ENSG00000138760 | SCARB2       | 1.26 | 1.26  | 0.33  | 4.99E-03 | 1.78E+01  | 1.78E+01 |
| ENSG00000213066 | FGFR1OP      | 0.81 | -1.24 | -0.31 | 4.86E-03 | -1.77E+01 | 1.77E+01 |
| ENSG00000142089 | IFITM3       | 0.80 | -1.25 | -0.32 | 4.96E-03 | -1.77E+01 | 1.77E+01 |
| ENSG00000059573 | ALDH18A1     | 0.80 | -1.25 | -0.32 | 4.94E-03 | -1.77E+01 | 1.77E+01 |
| ENSG00000198718 | FAM179B      | 1.27 | 1.27  | 0.35  | 5.15E-03 | 1.77E+01  | 1.77E+01 |
| ENSG00000100359 | SGSM3        | 0.81 | -1.23 | -0.30 | 4.87E-03 | -1.77E+01 | 1.77E+01 |
| ENSG00000166024 | R3HCC1L      | 1.28 | 1.28  | 0.35  | 5.21E-03 | 1.77E+01  | 1.77E+01 |
| ENSG00000151532 | VTI1A        | 1.23 | 1.23  | 0.30  | 4.87E-03 | 1.77E+01  | 1.77E+01 |
| ENSG00000113194 | FAF2         | 1.24 | 1.24  | 0.31  | 4.95E-03 | 1.77E+01  | 1.77E+01 |
| ENSG00000150687 | PRSS23       | 1.27 | 1.27  | 0.34  | 5.18E-03 | 1.76E+01  | 1.76E+01 |
| ENSG00000226479 | TMEM185B     | 1.41 | 1.41  | 0.49  | 6.42E-03 | 1.76E+01  | 1.76E+01 |
| ENSG00000178917 | ZNF852       | 0.73 | -1.37 | -0.45 | 6.11E-03 | -1.75E+01 | 1.75E+01 |
| ENSG00000105993 | DNAJB6       | 1.25 | 1.25  | 0.32  | 5.05E-03 | 1.75E+01  | 1.75E+01 |
| ENSG00000110442 | COMMD9       | 1.23 | 1.23  | 0.30  | 4.94E-03 | 1.75E+01  | 1.75E+01 |
| ENSG00000256667 | KLRAP1       | 1.47 | 1.47  | 0.56  | 7.08E-03 | 1.75E+01  | 1.75E+01 |
| ENSG00000128274 | A4GALT       | 1.31 | 1.31  | 0.39  | 5.63E-03 | 1.75E+01  | 1.75E+01 |
| ENSG00000155868 | MED7         | 0.80 | -1.25 | -0.32 | 5.14E-03 | -1.75E+01 | 1.75E+01 |
| ENSG00000080824 | HSP90AA1     | 1.30 | 1.30  | 0.38  | 5.57E-03 | 1.75E+01  | 1.75E+01 |
| ENSG00000061273 | HDAC7        | 1.25 | 1.25  | 0.32  | 5.14E-03 | 1.75E+01  | 1.75E+01 |
| ENSG00000158411 | MITD1        | 0.81 | -1.23 | -0.30 | 4.99E-03 | -1.74E+01 | 1.74E+01 |
| ENSG00000182858 | ALG12        | 1.26 | 1.26  | 0.34  | 5.25E-03 | 1.74E+01  | 1.74E+01 |
| ENSG00000099260 | PALMD        | 1.26 | 1.26  | 0.33  | 5.20E-03 | 1.74E+01  | 1.74E+01 |
| ENSG00000156795 | WDYHV1       | 0.78 | -1.28 | -0.36 | 5.43E-03 | -1.74E+01 | 1.74E+01 |
| ENSG00000117602 | RCAN3        | 0.66 | -1.51 | -0.60 | 7.58E-03 | -1.74E+01 | 1.74E+01 |
| ENSG00000119682 | KIAA0317     | 1.26 | 1.26  | 0.33  | 5.25E-03 | 1.74E+01  | 1.74E+01 |
| ENSG00000035681 | NSMAF        | 0.81 | -1.24 | -0.31 | 5.12E-03 | -1.74E+01 | 1.74E+01 |
| ENSG00000103148 | NPRL3        | 0.75 | -1.33 | -0.41 | 5.83E-03 | -1.74E+01 | 1.74E+01 |
| ENSG00000112096 | SOD2         | 1.25 | 1.25  | 0.32  | 5.18E-03 | 1.73E+01  | 1.73E+01 |
| ENSG00000048707 | VPS13D       | 1.31 | 1.31  | 0.39  | 5.74E-03 | 1.73E+01  | 1.73E+01 |
| ENSG00000139644 | TMBIM6       | 1.26 | 1.26  | 0.33  | 5.31E-03 | 1.73E+01  | 1.73E+01 |
| ENSG00000174483 | BBS1         | 1.27 | 1.27  | 0.34  | 5.38E-03 | 1.73E+01  | 1.73E+01 |
| ENSG00000105618 | PRPF31       | 0.80 | -1.24 | -0.32 | 5.19E-03 | -1.73E+01 | 1.73E+01 |
| ENSG00000146540 | C7orf50      | 0.81 | -1.23 | -0.30 | 5.07E-03 | -1.73E+01 | 1.73E+01 |
| ENSG00000213398 | LCAT         | 1.42 | 1.42  | 0.50  | 6.75E-03 | 1.72E+01  | 1.72E+01 |
| ENSG00000179950 | PUF60        | 0.80 | -1.25 | -0.32 | 5.28E-03 | -1.72E+01 | 1.72E+01 |
| ENSG00000105576 | TNPO2        | 0.79 | -1.27 | -0.35 | 5.50E-03 | -1.72E+01 | 1.72E+01 |
| ENSG00000144306 | SCRN3        | 1.24 | 1.24  | 0.31  | 5.23E-03 | 1.72E+01  | 1.72E+01 |
| ENSG00000061794 | MRPS35       | 0.80 | -1.25 | -0.32 | 5.27E-03 | -1.72E+01 | 1.72E+01 |
| ENSG00000268573 | RP11-158H5.7 | 0.70 | -1.42 | -0.51 | 6.89E-03 | -1.71E+01 | 1.71E+01 |
| ENSG00000143374 | TARS2        | 0.79 | -1.27 | -0.35 | 5.53E-03 | -1.71E+01 | 1.71E+01 |
| ENSG00000127452 | FBXL12       | 1.26 | 1.26  | 0.33  | 5.41E-03 | 1.71E+01  | 1.71E+01 |
| ENSG00000176386 | CDC26        | 0.79 | -1.26 | -0.33 | 5.44E-03 | -1.71E+01 | 1.71E+01 |
| ENSG00000178234 | GALNT11      | 0.81 | -1.23 | -0.30 | 5.20E-03 | -1.71E+01 | 1.71E+01 |
| ENSG00000108848 | LUC7L3       | 0.79 | -1.27 | -0.35 | 5.56E-03 | -1.71E+01 | 1.71E+01 |
| ENSG00000069329 | VPS35        | 1.25 | 1.25  | 0.32  | 5.33E-03 | 1.71E+01  | 1.71E+01 |
| ENSG00000151689 | INPP1        | 1.24 | 1.24  | 0.31  | 5.26E-03 | 1.71E+01  | 1.71E+01 |
| ENSG00000117408 | IPO13        | 1.27 | 1.27  | 0.35  | 5.56E-03 | 1.71E+01  | 1.71E+01 |
| ENSG00000196670 | ZFP62        | 1.24 | 1.24  | 0.31  | 5.29E-03 | 1.70E+01  | 1.70E+01 |
| ENSG00000133706 | LARS         | 0.80 | -1.24 | -0.32 | 5.35E-03 | -1.70E+01 | 1.70E+01 |
| ENSG00000109586 | GALNT7       | 0.79 | -1.26 | -0.34 | 5.54E-03 | -1.70E+01 | 1.70E+01 |
| ENSG00000108799 | EZH1         | 1.25 | 1.25  | 0.32  | 5.41E-03 | 1.69E+01  | 1.69E+01 |
| ENSG00000175505 | CLCF1        | 1.42 | 1.42  | 0.51  | 7.03E-03 | 1.69E+01  | 1.69E+01 |
| ENSG00000162065 | TBC1D24      | 0.81 | -1.24 | -0.31 | 5.37E-03 | -1.69E+01 | 1.69E+01 |
| ENSG00000168077 | SCARA3       | 0.80 | -1.26 | -0.33 | 5.53E-03 | -1.69E+01 | 1.69E+01 |
| ENSG00000101473 | ACOT8        | 0.79 | -1.27 | -0.34 | 5.64E-03 | -1.68E+01 | 1.68E+01 |
| ENSG00000138468 | SENP7        | 1.31 | 1.31  | 0.39  | 6.04E-03 | 1.68E+01  | 1.68E+01 |
| ENSG00000213906 | LTB4R2       | 1.46 | 1.46  | 0.55  | 7.54E-03 | 1.68E+01  | 1.68E+01 |
| ENSG00000139405 | C12orf52     | 0.80 | -1.25 | -0.32 | 5.54E-03 | -1.68E+01 | 1.68E+01 |
| ENSG00000110104 | CCDC86       | 1.38 | 1.38  | 0.46  | 6.71E-03 | 1.68E+01  | 1.68E+01 |
| ENSG00000100599 | RIN3         | 1.46 | 1.46  | 0.54  | 7.54E-03 | 1.68E+01  | 1.68E+01 |
| ENSG00000172167 | MTBP         | 0.78 | -1.28 | -0.36 | 5.82E-03 | -1.68E+01 | 1.68E+01 |
| ENSG00000116990 | MYCL1        | 0.70 | -1.43 | -0.51 | 7.23E-03 | -1.68E+01 | 1.68E+01 |
| ENSG00000170006 | TMEM154      | 0.80 | -1.26 | -0.33 | 5.61E-03 | -1.68E+01 | 1.68E+01 |
| ENSG00000005175 | RPAP3        | 0.78 | -1.28 | -0.36 | 5.88E-03 | -1.67E+01 | 1.67E+01 |
| ENSG00000108961 | RANGRF       | 0.80 | -1.26 | -0.33 | 5.65E-03 | -1.67E+01 | 1.67E+01 |
| ENSG00000133316 | WDR74        | 1.23 | 1.23  | 0.29  | 5.38E-03 | 1.67E+01  | 1.67E+01 |
| ENSG00000110395 | CBL          | 1.27 | 1.27  | 0.35  | 5.81E-03 | 1.67E+01  | 1.67E+01 |
| ENSG00000160888 | IER2         | 1.26 | 1.26  | 0.33  | 5.66E-03 | 1.67E+01  | 1.67E+01 |
| ENSG00000197256 | KANK2        | 1.25 | 1.25  | 0.32  | 5.63E-03 | 1.67E+01  | 1.67E+01 |
| ENSG00000203995 | ZYG11A       | 0.75 | -1.33 | -0.41 | 6.39E-03 | -1.67E+01 | 1.67E+01 |
| ENSG00000134955 | SLC37A2      | 0.68 | -1.48 | -0.57 | 7.94E-03 | -1.66E+01 | 1.66E+01 |
| ENSG00000127124 | HIVEP3       | 1.35 | 1.35  | 0.43  | 6.63E-03 | 1.66E+01  | 1.66E+01 |
| ENSG00000155158 | TTC39B       | 0.75 | -1.34 | -0.42 | 6.49E-03 | -1.66E+01 | 1.66E+01 |

|                  |               |      |       |       |          |           |          |
|------------------|---------------|------|-------|-------|----------|-----------|----------|
| ENSG00000115977  | AAK1          | 1.27 | 1.27  | 0.35  | 5.87E-03 | 1.66E+01  | 1.66E+01 |
| ENSG00000104142  | VPS18         | 1.23 | 1.23  | 0.30  | 5.53E-03 | 1.65E+01  | 1.65E+01 |
| ENSG00000158882  | TOMM40L       | 0.81 | -1.23 | -0.30 | 5.55E-03 | -1.65E+01 | 1.65E+01 |
| ENSG000000013306 | SLC25A39      | 0.81 | -1.24 | -0.31 | 5.66E-03 | -1.65E+01 | 1.65E+01 |
| ENSG00000185115  | NDNL2         | 1.23 | 1.23  | 0.30  | 5.55E-03 | 1.65E+01  | 1.65E+01 |
| ENSG00000173421  | CCDC36        | 0.75 | -1.34 | -0.42 | 6.62E-03 | -1.65E+01 | 1.65E+01 |
| ENSG00000049246  | PER3          | 0.69 | -1.46 | -0.54 | 7.83E-03 | -1.65E+01 | 1.65E+01 |
| ENSG00000133030  | MPRIIP        | 1.25 | 1.25  | 0.32  | 5.81E-03 | 1.64E+01  | 1.64E+01 |
| ENSG00000176058  | TPRN          | 0.79 | -1.27 | -0.34 | 5.99E-03 | -1.64E+01 | 1.64E+01 |
| ENSG00000135540  | NHSL1         | 1.25 | 1.25  | 0.33  | 5.86E-03 | 1.64E+01  | 1.64E+01 |
| ENSG00000150054  | MPP7          | 1.62 | 1.62  | 0.70  | 9.82E-03 | 1.64E+01  | 1.64E+01 |
| ENSG00000267520  | RP11-373L24.1 | 1.57 | 1.57  | 0.65  | 9.28E-03 | 1.63E+01  | 1.63E+01 |
| ENSG00000103222  | ABCC1         | 1.25 | 1.25  | 0.33  | 5.95E-03 | 1.63E+01  | 1.63E+01 |
| ENSG00000151702  | FLI1          | 0.81 | -1.24 | -0.31 | 5.84E-03 | -1.63E+01 | 1.63E+01 |
| ENSG00000259583  | RP11-66B24.4  | 1.33 | 1.33  | 0.42  | 6.73E-03 | 1.63E+01  | 1.63E+01 |
|                  | AC016683.6    | 1.37 | 1.37  | 0.45  | 7.11E-03 | 1.62E+01  | 1.62E+01 |
| ENSG00000167302  | ENTHD2        | 1.29 | 1.29  | 0.36  | 6.29E-03 | 1.62E+01  | 1.62E+01 |
| ENSG0000013364   | MVP           | 1.30 | 1.30  | 0.38  | 6.43E-03 | 1.62E+01  | 1.62E+01 |
| ENSG000000015479 | MATR3         | 1.31 | 1.31  | 0.38  | 6.50E-03 | 1.62E+01  | 1.62E+01 |
| ENSG00000137198  | GMPR          | 1.24 | 1.24  | 0.31  | 5.83E-03 | 1.62E+01  | 1.62E+01 |
| ENSG00000137166  | FOXP4         | 1.37 | 1.37  | 0.45  | 7.16E-03 | 1.62E+01  | 1.62E+01 |
| ENSG00000106330  | MOSPD3        | 1.32 | 1.32  | 0.40  | 6.74E-03 | 1.61E+01  | 1.61E+01 |
| ENSG00000164111  | ANXA5         | 1.24 | 1.24  | 0.32  | 5.98E-03 | 1.61E+01  | 1.61E+01 |
| ENSG00000184584  | TMEM173       | 1.26 | 1.26  | 0.33  | 6.11E-03 | 1.61E+01  | 1.61E+01 |
| ENSG00000133740  | EZF5          | 0.79 | -1.27 | -0.35 | 6.28E-03 | -1.61E+01 | 1.61E+01 |
| ENSG00000124942  | AHNAK         | 1.28 | 1.28  | 0.35  | 6.33E-03 | 1.61E+01  | 1.61E+01 |
| ENSG000000065135 | GNAI3         | 0.80 | -1.25 | -0.32 | 6.02E-03 | -1.60E+01 | 1.60E+01 |
| ENSG00000092445  | TYRO3         | 0.81 | -1.24 | -0.31 | 5.99E-03 | -1.60E+01 | 1.60E+01 |
| ENSG00000065029  | ZNF76         | 1.26 | 1.26  | 0.34  | 6.21E-03 | 1.60E+01  | 1.60E+01 |
| ENSG00000182287  | AP1S2         | 0.80 | -1.25 | -0.32 | 6.09E-03 | -1.60E+01 | 1.60E+01 |
| ENSG00000197043  | ANXA6         | 0.80 | -1.25 | -0.32 | 6.09E-03 | -1.60E+01 | 1.60E+01 |
| ENSG00000135390  | ATP5G2        | 0.80 | -1.26 | -0.33 | 6.20E-03 | -1.60E+01 | 1.60E+01 |
| ENSG00000160563  | MED27         | 1.27 | 1.27  | 0.35  | 6.37E-03 | 1.60E+01  | 1.60E+01 |
| ENSG00000078596  | ITM2A         | 1.53 | 1.53  | 0.61  | 9.14E-03 | 1.60E+01  | 1.60E+01 |
| ENSG00000185716  | C16orf52      | 0.81 | -1.23 | -0.30 | 5.99E-03 | -1.60E+01 | 1.60E+01 |
| ENSG00000148481  | FAM188A       | 0.82 | -1.22 | -0.29 | 5.90E-03 | -1.59E+01 | 1.59E+01 |
| ENSG00000160877  | NACC1         | 1.27 | 1.27  | 0.34  | 6.33E-03 | 1.59E+01  | 1.59E+01 |
| ENSG00000132819  | RBM38         | 1.25 | 1.25  | 0.32  | 6.13E-03 | 1.59E+01  | 1.59E+01 |
| ENSG00000173599  | PC            | 0.77 | -1.30 | -0.38 | 6.72E-03 | -1.59E+01 | 1.59E+01 |
| ENSG00000198730  | CTR9          | 1.23 | 1.23  | 0.30  | 5.98E-03 | 1.59E+01  | 1.59E+01 |
| ENSG00000215251  | FASTKD5       | 1.23 | 1.23  | 0.30  | 6.01E-03 | 1.59E+01  | 1.59E+01 |
| ENSG00000151835  | SACS          | 1.49 | 1.49  | 0.58  | 8.86E-03 | 1.59E+01  | 1.59E+01 |
| ENSG00000160326  | SLC2A6        | 0.81 | -1.23 | -0.30 | 6.03E-03 | -1.59E+01 | 1.59E+01 |
| ENSG00000143878  | RHOB          | 1.27 | 1.27  | 0.35  | 6.43E-03 | 1.58E+01  | 1.58E+01 |
| ENSG00000124074  | ENKD1         | 0.79 | -1.26 | -0.34 | 6.40E-03 | -1.58E+01 | 1.58E+01 |
| ENSG00000111860  | CEP85L        | 1.31 | 1.31  | 0.38  | 6.83E-03 | 1.58E+01  | 1.58E+01 |
| ENSG00000100417  | PMM1          | 0.75 | -1.34 | -0.42 | 7.25E-03 | -1.58E+01 | 1.58E+01 |
| ENSG00000197780  | TAF13         | 0.76 | -1.31 | -0.39 | 6.96E-03 | -1.57E+01 | 1.57E+01 |
| ENSG00000115641  | FHL2          | 1.24 | 1.24  | 0.32  | 6.26E-03 | 1.57E+01  | 1.57E+01 |
| ENSG00000186654  | PRR5          | 0.70 | -1.44 | -0.52 | 8.35E-03 | -1.57E+01 | 1.57E+01 |
| ENSG00000074657  | ZNF532        | 0.81 | -1.23 | -0.30 | 6.13E-03 | -1.57E+01 | 1.57E+01 |
| ENSG00000166348  | USP54         | 1.26 | 1.26  | 0.34  | 6.51E-03 | 1.57E+01  | 1.57E+01 |
| ENSG00000135677  | GNS           | 1.24 | 1.24  | 0.32  | 6.31E-03 | 1.57E+01  | 1.57E+01 |
| ENSG00000085998  | POMGNT1       | 1.23 | 1.23  | 0.30  | 6.20E-03 | 1.56E+01  | 1.56E+01 |
| ENSG00000185070  | FLRT2         | 0.80 | -1.24 | -0.32 | 6.33E-03 | -1.56E+01 | 1.56E+01 |
| ENSG00000267575  | CTC-459F4.3   | 0.76 | -1.32 | -0.40 | 7.10E-03 | -1.56E+01 | 1.56E+01 |
| ENSG00000143578  | CREB3L4       | 1.27 | 1.27  | 0.35  | 6.64E-03 | 1.56E+01  | 1.56E+01 |
| ENSG00000151576  | QTRTD1        | 0.81 | -1.24 | -0.31 | 6.33E-03 | -1.56E+01 | 1.56E+01 |
| ENSG00000158941  | KIAA1967      | 0.79 | -1.26 | -0.33 | 6.53E-03 | -1.56E+01 | 1.56E+01 |
| ENSG00000142409  | ZNF787        | 0.81 | -1.23 | -0.30 | 6.25E-03 | -1.56E+01 | 1.56E+01 |
| ENSG00000151690  | MFSD6         | 1.43 | 1.43  | 0.52  | 8.50E-03 | 1.56E+01  | 1.56E+01 |
| ENSG00000135837  | CEP350        | 1.54 | 1.54  | 0.62  | 9.76E-03 | 1.56E+01  | 1.56E+01 |
| ENSG0000013375   | PGM3          | 0.78 | -1.28 | -0.36 | 6.82E-03 | -1.55E+01 | 1.55E+01 |
| ENSG00000170325  | PRDM10        | 1.23 | 1.23  | 0.30  | 6.35E-03 | 1.55E+01  | 1.55E+01 |
| ENSG00000123636  | BAZ2B         | 1.47 | 1.47  | 0.55  | 8.95E-03 | 1.55E+01  | 1.55E+01 |
| ENSG00000161653  | NAGS          | 0.79 | -1.26 | -0.33 | 6.62E-03 | -1.55E+01 | 1.55E+01 |
| ENSG00000116005  | PCYOX1        | 1.26 | 1.26  | 0.33  | 6.59E-03 | 1.55E+01  | 1.55E+01 |
| ENSG00000172037  | LAMB2         | 1.34 | 1.34  | 0.42  | 7.45E-03 | 1.55E+01  | 1.55E+01 |
| ENSG00000145715  | RASA1         | 1.27 | 1.27  | 0.34  | 6.70E-03 | 1.55E+01  | 1.55E+01 |
|                  | RP11-290F20.1 | 0.69 | -1.45 | -0.53 | 8.73E-03 | -1.55E+01 | 1.55E+01 |
| ENSG00000169180  | XPO6          | 0.80 | -1.25 | -0.32 | 6.52E-03 | -1.55E+01 | 1.55E+01 |
| ENSG00000124172  | ATP5E         | 0.78 | -1.28 | -0.35 | 6.86E-03 | -1.54E+01 | 1.54E+01 |
| ENSG00000174306  | ZHX3          | 0.81 | -1.23 | -0.30 | 6.35E-03 | -1.54E+01 | 1.54E+01 |
| ENSG00000198087  | CD2AP         | 1.28 | 1.28  | 0.36  | 6.89E-03 | 1.54E+01  | 1.54E+01 |
| ENSG00000140876  | NUDT7         | 1.34 | 1.34  | 0.42  | 7.52E-03 | 1.54E+01  | 1.54E+01 |
| ENSG00000160439  | RDH13         | 0.76 | -1.31 | -0.39 | 7.22E-03 | -1.54E+01 | 1.54E+01 |
| ENSG00000101161  | PRPF6         | 0.81 | -1.23 | -0.30 | 6.45E-03 | -1.54E+01 | 1.54E+01 |
| ENSG00000115840  | SLC25A12      | 0.82 | -1.23 | -0.29 | 6.36E-03 | -1.54E+01 | 1.54E+01 |
| ENSG00000155621  | C9orf85       | 0.76 | -1.31 | -0.39 | 7.29E-03 | -1.54E+01 | 1.54E+01 |

|                 |               |      |       |       |          |           |          |
|-----------------|---------------|------|-------|-------|----------|-----------|----------|
| ENSG00000131848 | ZSCAN5A       | 1.37 | 1.37  | 0.46  | 7.97E-03 | 1.54E+01  | 1.54E+01 |
| ENSG00000169599 | NFU1          | 0.82 | -1.23 | -0.29 | 6.38E-03 | -1.54E+01 | 1.54E+01 |
| ENSG00000124160 | NCOA5         | 1.26 | 1.26  | 0.33  | 6.72E-03 | 1.54E+01  | 1.54E+01 |
| ENSG00000115652 | UXS1          | 1.42 | 1.42  | 0.50  | 8.51E-03 | 1.53E+01  | 1.53E+01 |
| ENSG00000182108 | DEXI          | 1.22 | 1.22  | 0.29  | 6.37E-03 | 1.53E+01  | 1.53E+01 |
| ENSG00000197548 | ATG7          | 0.82 | -1.23 | -0.29 | 6.42E-03 | -1.53E+01 | 1.53E+01 |
| ENSG00000196652 | ZKSCAN5       | 1.22 | 1.22  | 0.29  | 6.42E-03 | 1.53E+01  | 1.53E+01 |
| ENSG00000168268 | NT5DC2        | 1.24 | 1.24  | 0.31  | 6.62E-03 | 1.53E+01  | 1.53E+01 |
| ENSG00000142856 | ITGB3BP       | 0.81 | -1.23 | -0.30 | 6.49E-03 | -1.53E+01 | 1.53E+01 |
| ENSG00000173163 | COMMD1        | 0.81 | -1.23 | -0.30 | 6.53E-03 | -1.52E+01 | 1.52E+01 |
| ENSG00000138399 | FASTKD1       | 1.22 | 1.22  | 0.29  | 6.44E-03 | 1.52E+01  | 1.52E+01 |
| ENSG00000158859 | ADAMTS4       | 1.26 | 1.26  | 0.33  | 6.85E-03 | 1.52E+01  | 1.52E+01 |
| ENSG00000133313 | CNDP2         | 1.29 | 1.29  | 0.37  | 7.16E-03 | 1.52E+01  | 1.52E+01 |
| ENSG00000183615 | FAM167B       | 1.46 | 1.46  | 0.54  | 9.15E-03 | 1.52E+01  | 1.52E+01 |
| ENSG00000140854 | KATNB1        | 0.81 | -1.24 | -0.31 | 6.63E-03 | -1.52E+01 | 1.52E+01 |
| ENSG00000104067 | TJP1          | 1.24 | 1.24  | 0.31  | 6.64E-03 | 1.52E+01  | 1.52E+01 |
| ENSG00000273559 | CWC25         | 0.80 | -1.25 | -0.32 | 6.79E-03 | -1.52E+01 | 1.52E+01 |
| ENSG00000117222 | RBBP5         | 0.82 | -1.23 | -0.29 | 6.55E-03 | -1.51E+01 | 1.51E+01 |
| ENSG00000120093 | HOXB3         | 1.24 | 1.24  | 0.31  | 6.73E-03 | 1.51E+01  | 1.51E+01 |
| ENSG00000076067 | RBMS2         | 1.25 | 1.25  | 0.32  | 6.80E-03 | 1.51E+01  | 1.51E+01 |
| ENSG00000131351 | HAUS8         | 0.80 | -1.24 | -0.32 | 6.80E-03 | -1.51E+01 | 1.51E+01 |
| ENSG00000186871 | ERCC6L        | 0.74 | -1.35 | -0.43 | 7.99E-03 | -1.51E+01 | 1.51E+01 |
| ENSG00000100413 | POLR3H        | 0.82 | -1.22 | -0.29 | 6.58E-03 | -1.50E+01 | 1.50E+01 |
| ENSG00000086666 | ZFAND6        | 1.23 | 1.23  | 0.30  | 6.70E-03 | 1.50E+01  | 1.50E+01 |
| ENSG00000152443 | ZNF776        | 1.23 | 1.23  | 0.30  | 6.67E-03 | 1.50E+01  | 1.50E+01 |
|                 | RP3-402G11.5  | 0.79 | -1.26 | -0.33 | 7.03E-03 | -1.50E+01 | 1.50E+01 |
| ENSG00000136141 | LRCH1         | 1.29 | 1.29  | 0.37  | 7.42E-03 | 1.50E+01  | 1.50E+01 |
| ENSG00000198755 | RPL10A        | 0.80 | -1.25 | -0.32 | 6.92E-03 | -1.50E+01 | 1.50E+01 |
| ENSG00000168152 | THAP9         | 1.33 | 1.33  | 0.41  | 7.85E-03 | 1.50E+01  | 1.50E+01 |
| ENSG00000013288 | MAN2B2        | 1.31 | 1.31  | 0.39  | 7.66E-03 | 1.50E+01  | 1.50E+01 |
| ENSG00000111880 | RNGTT         | 0.81 | -1.23 | -0.30 | 6.72E-03 | -1.50E+01 | 1.50E+01 |
| ENSG00000157014 | TATDN2        | 1.26 | 1.26  | 0.33  | 7.12E-03 | 1.49E+01  | 1.49E+01 |
| ENSG00000070756 | PABPC1        | 1.25 | 1.25  | 0.32  | 6.97E-03 | 1.49E+01  | 1.49E+01 |
| ENSG00000111911 | HINT3         | 1.22 | 1.22  | 0.29  | 6.70E-03 | 1.49E+01  | 1.49E+01 |
| ENSG00000086696 | HSD17B2       | 1.47 | 1.47  | 0.55  | 9.73E-03 | 1.49E+01  | 1.49E+01 |
| ENSG00000147099 | HDAC8         | 0.81 | -1.23 | -0.30 | 6.86E-03 | -1.48E+01 | 1.48E+01 |
| ENSG0000014919  | COX15         | 1.27 | 1.27  | 0.34  | 7.33E-03 | 1.48E+01  | 1.48E+01 |
| ENSG00000085365 | SCAMP1        | 1.29 | 1.29  | 0.37  | 7.63E-03 | 1.48E+01  | 1.48E+01 |
| ENSG00000116954 | RRAGC         | 1.27 | 1.27  | 0.35  | 7.45E-03 | 1.47E+01  | 1.47E+01 |
| ENSG00000156976 | EIF4A2        | 0.81 | -1.24 | -0.31 | 7.09E-03 | -1.47E+01 | 1.47E+01 |
| ENSG00000164237 | CMBL          | 0.80 | -1.25 | -0.33 | 7.24E-03 | -1.47E+01 | 1.47E+01 |
| ENSG00000204634 | TBC1D8        | 0.80 | -1.25 | -0.32 | 7.18E-03 | -1.47E+01 | 1.47E+01 |
| ENSG00000110925 | CSRNP2        | 1.23 | 1.23  | 0.30  | 7.02E-03 | 1.47E+01  | 1.47E+01 |
| ENSG00000133138 | TBC1D8B       | 1.28 | 1.28  | 0.35  | 7.58E-03 | 1.46E+01  | 1.46E+01 |
| ENSG00000132196 | HSD17B7       | 1.29 | 1.29  | 0.36  | 7.71E-03 | 1.46E+01  | 1.46E+01 |
| ENSG00000197063 | MAFG          | 1.23 | 1.23  | 0.29  | 7.05E-03 | 1.46E+01  | 1.46E+01 |
| ENSG00000118705 | RPN2          | 1.24 | 1.24  | 0.31  | 7.17E-03 | 1.46E+01  | 1.46E+01 |
| ENSG00000215301 | DDX3X         | 1.28 | 1.28  | 0.36  | 7.75E-03 | 1.46E+01  | 1.46E+01 |
| ENSG00000107937 | GTPBP4        | 0.81 | -1.23 | -0.30 | 7.17E-03 | -1.46E+01 | 1.46E+01 |
| ENSG00000197299 | BLM           | 0.81 | -1.24 | -0.31 | 7.25E-03 | -1.46E+01 | 1.46E+01 |
| ENSG00000173214 | KIAA1919      | 1.26 | 1.26  | 0.33  | 7.45E-03 | 1.46E+01  | 1.46E+01 |
| ENSG00000184226 | PCDH9         | 0.78 | -1.29 | -0.36 | 7.81E-03 | -1.45E+01 | 1.45E+01 |
| ENSG00000141577 | AZI1          | 0.79 | -1.27 | -0.34 | 7.58E-03 | -1.45E+01 | 1.45E+01 |
| ENSG00000153982 | GDPD1         | 0.75 | -1.34 | -0.42 | 8.44E-03 | -1.45E+01 | 1.45E+01 |
| ENSG00000143537 | ADAM15        | 1.24 | 1.24  | 0.31  | 7.24E-03 | 1.45E+01  | 1.45E+01 |
| ENSG00000009830 | POMT2         | 1.26 | 1.26  | 0.33  | 7.49E-03 | 1.45E+01  | 1.45E+01 |
| ENSG00000186812 | ZNF397        | 1.30 | 1.30  | 0.38  | 8.08E-03 | 1.45E+01  | 1.45E+01 |
| ENSG00000179941 | BBS10         | 0.81 | -1.24 | -0.31 | 7.27E-03 | -1.45E+01 | 1.45E+01 |
| ENSG00000159063 | ALG8          | 1.22 | 1.22  | 0.29  | 7.10E-03 | 1.45E+01  | 1.45E+01 |
| ENSG00000181827 | RFX7          | 1.23 | 1.23  | 0.30  | 7.23E-03 | 1.45E+01  | 1.45E+01 |
| ENSG00000182667 | NTM           | 1.40 | 1.40  | 0.48  | 9.33E-03 | 1.45E+01  | 1.45E+01 |
| ENSG00000169946 | ZFPM2         | 0.80 | -1.25 | -0.33 | 7.51E-03 | -1.45E+01 | 1.45E+01 |
| ENSG00000158805 | ZNF276        | 1.22 | 1.22  | 0.29  | 7.15E-03 | 1.44E+01  | 1.44E+01 |
| ENSG00000186364 | NUDT17        | 1.37 | 1.37  | 0.45  | 9.02E-03 | 1.44E+01  | 1.44E+01 |
| ENSG00000072571 | HMMR          | 1.44 | 1.44  | 0.53  | 1.00E-02 | 1.44E+01  | 1.44E+01 |
| ENSG00000100227 | POLDIP3       | 1.23 | 1.23  | 0.30  | 7.26E-03 | 1.44E+01  | 1.44E+01 |
| ENSG00000125812 | GZF1          | 0.80 | -1.25 | -0.33 | 7.56E-03 | -1.44E+01 | 1.44E+01 |
| ENSG00000198521 | ZNF43         | 1.27 | 1.27  | 0.34  | 7.74E-03 | 1.44E+01  | 1.44E+01 |
| ENSG00000111348 | ARHGDIB       | 1.24 | 1.24  | 0.31  | 7.37E-03 | 1.44E+01  | 1.44E+01 |
| ENSG00000218347 | HNRNPA1P1     | 1.53 | 1.53  | 0.61  | 1.12E-02 | 1.44E+01  | 1.44E+01 |
| ENSG00000197498 | RPF2          | 0.79 | -1.26 | -0.33 | 7.74E-03 | -1.43E+01 | 1.43E+01 |
| ENSG00000205707 | LYRM5         | 0.80 | -1.24 | -0.31 | 7.56E-03 | -1.43E+01 | 1.43E+01 |
| ENSG00000013523 | ANGEL1        | 1.25 | 1.25  | 0.32  | 7.59E-03 | 1.43E+01  | 1.43E+01 |
| ENSG00000268471 | DKFZP434I0714 | 0.73 | -1.36 | -0.45 | 9.08E-03 | -1.43E+01 | 1.43E+01 |
| ENSG00000101945 | SUV39H1       | 0.77 | -1.29 | -0.37 | 8.17E-03 | -1.43E+01 | 1.43E+01 |
| ENSG00000164053 | ATRIP         | 0.78 | -1.28 | -0.36 | 8.07E-03 | -1.43E+01 | 1.43E+01 |
| ENSG00000198945 | L3MBTL3       | 1.26 | 1.26  | 0.33  | 7.73E-03 | 1.43E+01  | 1.43E+01 |
| ENSG00000174444 | RPL4          | 0.81 | -1.24 | -0.31 | 7.49E-03 | -1.43E+01 | 1.43E+01 |
| ENSG00000262099 | AC004148.1    | 0.70 | -1.42 | -0.51 | 9.89E-03 | -1.43E+01 | 1.43E+01 |

|                 |               |      |       |       |          |           |          |
|-----------------|---------------|------|-------|-------|----------|-----------|----------|
| ENSG00000145819 | ARHGAP26      | 0.81 | -1.23 | -0.30 | 7.49E-03 | -1.43E+01 | 1.43E+01 |
| ENSG00000113734 | BNIP1         | 0.80 | -1.25 | -0.33 | 7.73E-03 | -1.42E+01 | 1.42E+01 |
| ENSG00000198298 | ZNF485        | 0.71 | -1.41 | -0.50 | 9.87E-03 | -1.42E+01 | 1.42E+01 |
| ENSG00000240694 | PNMA2         | 0.81 | -1.24 | -0.31 | 7.61E-03 | -1.42E+01 | 1.42E+01 |
| ENSG00000240498 | CDKN2B-AS1    | 1.41 | 1.41  | 0.49  | 9.81E-03 | 1.42E+01  | 1.42E+01 |
| ENSG00000030110 | BAK1          | 1.24 | 1.24  | 0.31  | 7.65E-03 | 1.42E+01  | 1.42E+01 |
| ENSG00000131725 | WDR44         | 1.22 | 1.22  | 0.29  | 7.39E-03 | 1.42E+01  | 1.42E+01 |
| ENSG00000135698 | MPHOSPH6      | 0.82 | -1.22 | -0.28 | 7.33E-03 | -1.42E+01 | 1.42E+01 |
| ENSG00000112290 | WASF1         | 1.25 | 1.25  | 0.32  | 7.76E-03 | 1.42E+01  | 1.42E+01 |
| ENSG00000186352 | ANKRD37       | 1.42 | 1.42  | 0.50  | 9.95E-03 | 1.42E+01  | 1.42E+01 |
| ENSG00000072163 | LIMS2         | 0.80 | -1.26 | -0.33 | 7.84E-03 | -1.42E+01 | 1.42E+01 |
| ENSG00000141367 | CLTC          | 1.24 | 1.24  | 0.31  | 7.61E-03 | 1.42E+01  | 1.42E+01 |
| ENSG00000152684 | PELO          | 1.22 | 1.22  | 0.28  | 7.40E-03 | 1.41E+01  | 1.41E+01 |
| ENSG00000151498 | ACAD8         | 0.82 | -1.22 | -0.29 | 7.44E-03 | -1.41E+01 | 1.41E+01 |
| ENSG00000158863 | FAM160B2      | 1.26 | 1.26  | 0.33  | 7.91E-03 | 1.41E+01  | 1.41E+01 |
| ENSG00000148143 | ZNF462        | 1.25 | 1.25  | 0.32  | 7.85E-03 | 1.41E+01  | 1.41E+01 |
| ENSG00000134970 | TMED7         | 0.80 | -1.25 | -0.32 | 7.88E-03 | -1.41E+01 | 1.41E+01 |
| ENSG00000179044 | EXOC3L1       | 1.43 | 1.43  | 0.52  | 1.03E-02 | 1.41E+01  | 1.41E+01 |
| ENSG00000114302 | PRKAR2A       | 0.81 | -1.24 | -0.31 | 7.72E-03 | -1.41E+01 | 1.41E+01 |
| ENSG00000204842 | ATXN2         | 1.26 | 1.26  | 0.33  | 8.02E-03 | 1.40E+01  | 1.40E+01 |
| ENSG00000155903 | RASA2         | 1.24 | 1.24  | 0.31  | 7.81E-03 | 1.40E+01  | 1.40E+01 |
| ENSG00000103174 | NAGPA         | 1.24 | 1.24  | 0.32  | 7.89E-03 | 1.40E+01  | 1.40E+01 |
| ENSG00000136936 | XPA           | 0.81 | -1.23 | -0.30 | 7.76E-03 | -1.40E+01 | 1.40E+01 |
| ENSG00000166986 | MARS          | 0.80 | -1.24 | -0.31 | 7.88E-03 | -1.40E+01 | 1.40E+01 |
| ENSG00000082516 | GEMIN5        | 0.82 | -1.23 | -0.29 | 7.73E-03 | -1.39E+01 | 1.39E+01 |
| ENSG00000179428 | AC073072.5    | 0.72 | -1.38 | -0.47 | 9.86E-03 | -1.39E+01 | 1.39E+01 |
| ENSG00000231365 | RP11-418J17.1 | 1.29 | 1.29  | 0.37  | 8.58E-03 | 1.39E+01  | 1.39E+01 |
| ENSG00000147454 | SLC25A37      | 1.22 | 1.22  | 0.28  | 7.63E-03 | 1.39E+01  | 1.39E+01 |
| ENSG00000227500 | SCAMP4        | 0.78 | -1.28 | -0.35 | 8.42E-03 | -1.39E+01 | 1.39E+01 |
| ENSG00000115457 | IGFBP2        | 0.81 | -1.24 | -0.31 | 7.94E-03 | -1.39E+01 | 1.39E+01 |
| ENSG00000164684 | ZNF704        | 1.23 | 1.23  | 0.30  | 7.87E-03 | 1.38E+01  | 1.38E+01 |
| ENSG00000232956 | SNHG15        | 0.80 | -1.25 | -0.33 | 8.20E-03 | -1.38E+01 | 1.38E+01 |
| ENSG00000090006 | LTBP4         | 1.33 | 1.33  | 0.41  | 9.29E-03 | 1.38E+01  | 1.38E+01 |
| ENSG00000170889 | RPS9          | 0.79 | -1.27 | -0.34 | 8.41E-03 | -1.38E+01 | 1.38E+01 |
| ENSG00000132205 | EMILIN2       | 0.78 | -1.29 | -0.37 | 8.69E-03 | -1.38E+01 | 1.38E+01 |
| ENSG00000160695 | VPS11         | 1.22 | 1.22  | 0.28  | 7.75E-03 | 1.38E+01  | 1.38E+01 |
| ENSG00000105254 | TBCB          | 0.81 | -1.23 | -0.30 | 7.94E-03 | -1.38E+01 | 1.38E+01 |
| ENSG00000258890 | CEP95         | 0.81 | -1.23 | -0.30 | 8.02E-03 | -1.38E+01 | 1.38E+01 |
| ENSG00000010438 | PRSS3         | 1.25 | 1.25  | 0.32  | 8.22E-03 | 1.37E+01  | 1.37E+01 |
| ENSG00000196367 | TRRAP         | 1.33 | 1.33  | 0.41  | 9.37E-03 | 1.37E+01  | 1.37E+01 |
| ENSG00000272333 | WBP7          | 1.26 | 1.26  | 0.33  | 8.40E-03 | 1.37E+01  | 1.37E+01 |
| ENSG00000196371 | FUT4          | 0.80 | -1.25 | -0.32 | 8.32E-03 | -1.37E+01 | 1.37E+01 |
| ENSG00000136059 | RP11-742N3.1  | 0.69 | -1.45 | -0.54 | 1.13E-02 | -1.37E+01 | 1.37E+01 |
| ENSG00000088812 | VILL          | 0.75 | -1.33 | -0.41 | 9.50E-03 | -1.37E+01 | 1.37E+01 |
| ENSG00000163166 | ATRN          | 1.24 | 1.24  | 0.31  | 8.23E-03 | 1.37E+01  | 1.37E+01 |
| ENSG00000145860 | IWS1          | 0.82 | -1.22 | -0.29 | 8.04E-03 | -1.36E+01 | 1.36E+01 |
| ENSG00000122882 | RNF145        | 1.31 | 1.31  | 0.39  | 9.25E-03 | 1.36E+01  | 1.36E+01 |
| ENSG00000079459 | ECD           | 0.82 | -1.22 | -0.29 | 7.99E-03 | -1.36E+01 | 1.36E+01 |
| ENSG00000100916 | FDFT1         | 0.81 | -1.23 | -0.30 | 8.17E-03 | -1.36E+01 | 1.36E+01 |
| ENSG00000131116 | BRMS1L        | 0.77 | -1.30 | -0.38 | 9.15E-03 | -1.36E+01 | 1.36E+01 |
| ENSG00000065802 | ZNF428        | 0.81 | -1.23 | -0.30 | 8.13E-03 | -1.36E+01 | 1.36E+01 |
| ENSG00000130349 | ASB1          | 1.22 | 1.22  | 0.29  | 8.06E-03 | 1.36E+01  | 1.36E+01 |
| ENSG00000088838 | C6orf203      | 0.81 | -1.23 | -0.30 | 8.18E-03 | -1.36E+01 | 1.36E+01 |
| ENSG00000038219 | MED24         | 1.24 | 1.24  | 0.31  | 8.28E-03 | 1.36E+01  | 1.36E+01 |
| ENSG00000104375 | BOD1L1        | 1.46 | 1.46  | 0.54  | 1.15E-02 | 1.36E+01  | 1.36E+01 |
| ENSG00000127314 | STK3          | 0.80 | -1.25 | -0.32 | 8.40E-03 | -1.36E+01 | 1.36E+01 |
| ENSG00000156052 | RAP1B         | 1.25 | 1.25  | 0.32  | 8.51E-03 | 1.36E+01  | 1.36E+01 |
| ENSG00000115239 | GNAQ          | 1.23 | 1.23  | 0.30  | 8.21E-03 | 1.36E+01  | 1.36E+01 |
| ENSG00000068745 | ASB3          | 1.21 | 1.21  | 0.28  | 8.06E-03 | 1.35E+01  | 1.35E+01 |
| ENSG0000008311  | IP6K2         | 1.22 | 1.22  | 0.29  | 8.17E-03 | 1.35E+01  | 1.35E+01 |
| ENSG00000144136 | AASS          | 1.23 | 1.23  | 0.30  | 8.25E-03 | 1.35E+01  | 1.35E+01 |
| ENSG00000101773 | SLC20A1       | 1.25 | 1.25  | 0.32  | 8.56E-03 | 1.35E+01  | 1.35E+01 |
| ENSG00000123595 | RBBP8         | 1.25 | 1.25  | 0.32  | 8.61E-03 | 1.35E+01  | 1.35E+01 |
| ENSG00000196981 | RAB9A         | 1.22 | 1.22  | 0.28  | 8.15E-03 | 1.35E+01  | 1.35E+01 |
| ENSG00000095066 | WDR5B         | 0.79 | -1.26 | -0.34 | 8.79E-03 | -1.35E+01 | 1.35E+01 |
| ENSG00000114790 | HOOK2         | 1.29 | 1.29  | 0.37  | 9.22E-03 | 1.35E+01  | 1.35E+01 |
| ENSG00000068400 | ARHGEF26      | 0.64 | -1.57 | -0.65 | 1.36E-02 | -1.35E+01 | 1.35E+01 |
| ENSG00000114767 | GRIPAP1       | 0.82 | -1.22 | -0.29 | 8.21E-03 | -1.35E+01 | 1.35E+01 |
| ENSG00000143515 | RRP9          | 0.80 | -1.24 | -0.32 | 8.56E-03 | -1.35E+01 | 1.35E+01 |
| ENSG00000119537 | ATP8B2        | 1.23 | 1.23  | 0.30  | 8.43E-03 | 1.35E+01  | 1.35E+01 |
| ENSG0000014978  | KDSR          | 1.22 | 1.22  | 0.29  | 8.22E-03 | 1.34E+01  | 1.34E+01 |
| ENSG00000148362 | MOB1A         | 0.81 | -1.23 | -0.30 | 8.40E-03 | -1.34E+01 | 1.34E+01 |
| ENSG00000120616 | C9orf142      | 0.80 | -1.25 | -0.32 | 8.70E-03 | -1.34E+01 | 1.34E+01 |
| ENSG00000173457 | EPC1          | 0.82 | -1.22 | -0.29 | 8.28E-03 | -1.34E+01 | 1.34E+01 |
| ENSG00000138593 | PPP1R14B      | 1.23 | 1.23  | 0.30  | 8.42E-03 | 1.34E+01  | 1.34E+01 |
| ENSG00000248175 | SECISBP2L     | 1.24 | 1.24  | 0.31  | 8.49E-03 | 1.34E+01  | 1.34E+01 |
| ENSG00000181555 | CTC-428G20.3  | 0.63 | -1.60 | -0.68 | 1.42E-02 | -1.34E+01 | 1.34E+01 |
| ENSG00000171316 | SETD2         | 1.23 | 1.23  | 0.30  | 8.39E-03 | 1.34E+01  | 1.34E+01 |
|                 | CHD7          | 1.22 | 1.22  | 0.29  | 8.30E-03 | 1.34E+01  | 1.34E+01 |

|                  |                |      |       |       |          |           |          |
|------------------|----------------|------|-------|-------|----------|-----------|----------|
| ENSG00000105185  | PDCD5          | 0.81 | -1.23 | -0.30 | 8.45E-03 | -1.34E+01 | 1.34E+01 |
| ENSG00000177409  | SAMD9L         | 1.36 | 1.36  | 0.45  | 1.04E-02 | 1.34E+01  | 1.34E+01 |
| ENSG00000112511  | PHF1           | 0.80 | -1.24 | -0.32 | 8.66E-03 | -1.34E+01 | 1.34E+01 |
| ENSG00000074660  | SCARF1         | 1.24 | 1.24  | 0.31  | 8.59E-03 | 1.34E+01  | 1.34E+01 |
| ENSG00000165699  | TSC1           | 1.22 | 1.22  | 0.29  | 8.39E-03 | 1.34E+01  | 1.34E+01 |
| ENSG00000122376  | FAM35A         | 1.24 | 1.24  | 0.31  | 8.67E-03 | 1.33E+01  | 1.33E+01 |
| ENSG00000099942  | CRKL           | 0.81 | -1.24 | -0.31 | 8.60E-03 | -1.33E+01 | 1.33E+01 |
| ENSG00000177096  | FAM109B        | 0.81 | -1.24 | -0.31 | 8.67E-03 | -1.33E+01 | 1.33E+01 |
| ENSG00000120784  | ZFP30          | 1.25 | 1.25  | 0.32  | 8.77E-03 | 1.33E+01  | 1.33E+01 |
| ENSG000000264207 | RP11-196G18.23 | 0.70 | -1.43 | -0.51 | 1.15E-02 | -1.33E+01 | 1.33E+01 |
| ENSG00000032444  | PNPLA6         | 1.26 | 1.26  | 0.34  | 9.05E-03 | 1.33E+01  | 1.33E+01 |
| ENSG00000186687  | LYRM7          | 0.81 | -1.24 | -0.31 | 8.73E-03 | -1.33E+01 | 1.33E+01 |
| ENSG00000170017  | ALCAM          | 1.27 | 1.27  | 0.34  | 9.17E-03 | 1.32E+01  | 1.32E+01 |
| ENSG00000157837  | SPPL3          | 1.24 | 1.24  | 0.31  | 8.81E-03 | 1.32E+01  | 1.32E+01 |
| ENSG00000110108  | TMEM109        | 1.26 | 1.26  | 0.33  | 9.12E-03 | 1.32E+01  | 1.32E+01 |
|                  | RP11-453E17.1  | 0.78 | -1.28 | -0.35 | 9.35E-03 | -1.32E+01 | 1.32E+01 |
| ENSG00000177383  | MAGEF1         | 1.23 | 1.23  | 0.30  | 8.76E-03 | 1.32E+01  | 1.32E+01 |
| ENSG00000110321  | EIF4G2         | 1.23 | 1.23  | 0.30  | 8.76E-03 | 1.32E+01  | 1.32E+01 |
| ENSG00000167550  | RHEBL1         | 0.69 | -1.44 | -0.53 | 1.20E-02 | -1.32E+01 | 1.32E+01 |
| ENSG00000015676  | NUDCD3         | 1.22 | 1.22  | 0.29  | 8.66E-03 | 1.31E+01  | 1.31E+01 |
| ENSG00000103544  | C16orf62       | 0.81 | -1.23 | -0.30 | 8.77E-03 | -1.31E+01 | 1.31E+01 |
| ENSG00000144746  | ARL6IP5        | 1.30 | 1.30  | 0.38  | 9.78E-03 | 1.31E+01  | 1.31E+01 |
| ENSG00000169689  | STRA13         | 0.80 | -1.25 | -0.32 | 9.04E-03 | -1.31E+01 | 1.31E+01 |
| ENSG00000137338  | PGBD1          | 0.81 | -1.23 | -0.30 | 8.82E-03 | -1.31E+01 | 1.31E+01 |
| ENSG00000196693  | ZNF33B         | 1.33 | 1.33  | 0.41  | 1.03E-02 | 1.31E+01  | 1.31E+01 |
| ENSG00000137944  | CCBL2          | 0.81 | -1.23 | -0.30 | 8.88E-03 | -1.31E+01 | 1.31E+01 |
| ENSG00000176473  | WDR25          | 0.80 | -1.25 | -0.32 | 9.14E-03 | -1.31E+01 | 1.31E+01 |
| ENSG00000100379  | KCTD17         | 0.82 | -1.22 | -0.28 | 8.67E-03 | -1.31E+01 | 1.31E+01 |
| ENSG00000100426  | ZBED4          | 1.28 | 1.28  | 0.35  | 9.54E-03 | 1.31E+01  | 1.31E+01 |
| ENSG00000115274  | INO80B         | 0.81 | -1.23 | -0.30 | 8.92E-03 | -1.30E+01 | 1.30E+01 |
| ENSG00000063180  | CA11           | 1.42 | 1.42  | 0.51  | 1.20E-02 | 1.30E+01  | 1.30E+01 |
| ENSG00000139163  | ETNK1          | 1.21 | 1.21  | 0.28  | 8.64E-03 | 1.30E+01  | 1.30E+01 |
| ENSG00000124181  | PLCG1          | 1.22 | 1.22  | 0.29  | 8.85E-03 | 1.30E+01  | 1.30E+01 |
| ENSG00000118922  | KLF12          | 1.29 | 1.29  | 0.37  | 9.87E-03 | 1.30E+01  | 1.30E+01 |
| ENSG00000197903  | HIST1H2BK      | 0.80 | -1.25 | -0.32 | 9.27E-03 | -1.30E+01 | 1.30E+01 |
| ENSG00000131408  | NR1H2          | 0.82 | -1.22 | -0.29 | 8.92E-03 | -1.30E+01 | 1.30E+01 |
| ENSG00000160007  | ARHGAP35       | 1.23 | 1.23  | 0.30  | 9.02E-03 | 1.29E+01  | 1.29E+01 |
| ENSG00000213799  | ZNF845         | 1.32 | 1.32  | 0.40  | 1.03E-02 | 1.29E+01  | 1.29E+01 |
| ENSG00000151893  | CACUL1         | 1.23 | 1.23  | 0.30  | 9.05E-03 | 1.29E+01  | 1.29E+01 |
| ENSG00000213047  | DENND1B        | 1.36 | 1.36  | 0.44  | 1.10E-02 | 1.29E+01  | 1.29E+01 |
| ENSG00000091640  | SPAG7          | 1.22 | 1.22  | 0.29  | 8.95E-03 | 1.29E+01  | 1.29E+01 |
| ENSG00000003756  | RBM5           | 0.81 | -1.24 | -0.31 | 9.18E-03 | -1.29E+01 | 1.29E+01 |
| ENSG00000162817  | C1orf115       | 1.23 | 1.23  | 0.30  | 9.03E-03 | 1.29E+01  | 1.29E+01 |
| ENSG00000114391  | RPL24          | 0.81 | -1.24 | -0.31 | 9.21E-03 | -1.29E+01 | 1.29E+01 |
| ENSG00000126603  | GLIS2          | 1.45 | 1.45  | 0.53  | 1.26E-02 | 1.29E+01  | 1.29E+01 |
| ENSG00000101850  | GPR143         | 1.22 | 1.22  | 0.29  | 8.97E-03 | 1.29E+01  | 1.29E+01 |
| ENSG00000118454  | ANKRD13C       | 1.21 | 1.21  | 0.28  | 8.82E-03 | 1.29E+01  | 1.29E+01 |
| ENSG00000174353  | STAG3L3        | 0.68 | -1.46 | -0.55 | 1.28E-02 | -1.29E+01 | 1.29E+01 |
| ENSG00000154429  | CCSAP          | 0.82 | -1.22 | -0.28 | 8.93E-03 | -1.29E+01 | 1.29E+01 |
| ENSG00000148841  | ITPRIP         | 1.22 | 1.22  | 0.29  | 9.03E-03 | 1.29E+01  | 1.29E+01 |
| ENSG00000159433  | STARD9         | 0.80 | -1.25 | -0.32 | 9.41E-03 | -1.29E+01 | 1.29E+01 |
| ENSG00000095794  | CREM           | 1.23 | 1.23  | 0.30  | 9.12E-03 | 1.29E+01  | 1.29E+01 |
| ENSG00000164542  | KIAA0895       | 1.27 | 1.27  | 0.35  | 9.75E-03 | 1.29E+01  | 1.29E+01 |
| ENSG00000187650  | VMAC           | 0.72 | -1.39 | -0.48 | 1.17E-02 | -1.29E+01 | 1.29E+01 |
| ENSG00000196182  | STK40          | 1.22 | 1.22  | 0.29  | 9.06E-03 | 1.29E+01  | 1.29E+01 |
| ENSG00000172757  | CFL1           | 1.24 | 1.24  | 0.31  | 9.26E-03 | 1.28E+01  | 1.28E+01 |
| ENSG00000127311  | HELB           | 0.75 | -1.34 | -0.42 | 1.09E-02 | -1.28E+01 | 1.28E+01 |
| ENSG00000132357  | CARD6          | 1.22 | 1.22  | 0.29  | 9.10E-03 | 1.28E+01  | 1.28E+01 |
| ENSG00000269881  | ITFG3          | 1.26 | 1.26  | 0.34  | 9.73E-03 | 1.28E+01  | 1.28E+01 |
| ENSG00000054118  | THRAP3         | 0.82 | -1.23 | -0.29 | 9.16E-03 | -1.28E+01 | 1.28E+01 |
| ENSG00000119509  | INVS           | 1.21 | 1.21  | 0.28  | 8.97E-03 | 1.28E+01  | 1.28E+01 |
| ENSG00000154978  | VOPP1          | 1.23 | 1.23  | 0.30  | 9.28E-03 | 1.28E+01  | 1.28E+01 |
| ENSG00000167232  | ZNF91          | 1.33 | 1.33  | 0.41  | 1.08E-02 | 1.28E+01  | 1.28E+01 |
| ENSG00000103199  | ZNF500         | 1.25 | 1.25  | 0.32  | 9.54E-03 | 1.28E+01  | 1.28E+01 |
| ENSG00000171295  | ZNF440         | 1.23 | 1.23  | 0.30  | 9.27E-03 | 1.28E+01  | 1.28E+01 |
| ENSG00000121621  | KIF18A         | 0.79 | -1.27 | -0.34 | 9.84E-03 | -1.28E+01 | 1.28E+01 |
| ENSG00000124571  | XPO5           | 0.82 | -1.23 | -0.29 | 9.25E-03 | -1.27E+01 | 1.27E+01 |
| ENSG00000084652  | TXLNA          | 0.81 | -1.24 | -0.31 | 9.47E-03 | -1.27E+01 | 1.27E+01 |
| ENSG00000117632  | STMN1          | 1.39 | 1.39  | 0.48  | 1.20E-02 | 1.27E+01  | 1.27E+01 |
| ENSG00000214413  | BBIP1          | 1.22 | 1.22  | 0.29  | 9.22E-03 | 1.27E+01  | 1.27E+01 |
| ENSG000000011638 | TMEM159        | 0.82 | -1.21 | -0.28 | 9.16E-03 | -1.27E+01 | 1.27E+01 |
| ENSG00000257093  | KIAA1147       | 1.23 | 1.23  | 0.29  | 9.33E-03 | 1.27E+01  | 1.27E+01 |
| ENSG00000178177  | LCORL          | 0.79 | -1.27 | -0.34 | 9.99E-03 | -1.27E+01 | 1.27E+01 |
| ENSG00000213366  | GSTM2          | 0.74 | -1.36 | -0.44 | 1.14E-02 | -1.27E+01 | 1.27E+01 |
| ENSG00000153107  | ANAPC1         | 0.82 | -1.22 | -0.29 | 9.28E-03 | -1.27E+01 | 1.27E+01 |
| ENSG00000003436  | TFPI           | 1.31 | 1.31  | 0.39  | 1.07E-02 | 1.27E+01  | 1.27E+01 |
| ENSG00000214655  | ZSWIM8         | 1.22 | 1.22  | 0.28  | 9.23E-03 | 1.27E+01  | 1.27E+01 |
| ENSG00000110888  | CAPRIN2        | 0.82 | -1.22 | -0.28 | 9.26E-03 | -1.26E+01 | 1.26E+01 |
| ENSG00000161800  | RACGAP1        | 0.81 | -1.23 | -0.30 | 9.43E-03 | -1.26E+01 | 1.26E+01 |

|                  |              |      |       |       |          |           |          |
|------------------|--------------|------|-------|-------|----------|-----------|----------|
| ENSG00000101544  | ADNP2        | 0.80 | -1.25 | -0.32 | 9.80E-03 | -1.26E+01 | 1.26E+01 |
| ENSG00000099625  | C19orf26     | 1.35 | 1.35  | 0.44  | 1.15E-02 | 1.26E+01  | 1.26E+01 |
| ENSG00000196961  | AP2A1        | 1.26 | 1.26  | 0.33  | 9.93E-03 | 1.26E+01  | 1.26E+01 |
| ENSG00000186767  | SPIN4        | 0.80 | -1.26 | -0.33 | 9.96E-03 | -1.26E+01 | 1.26E+01 |
| ENSG00000224959  | AC017002.2   | 1.36 | 1.36  | 0.45  | 1.17E-02 | 1.26E+01  | 1.26E+01 |
| ENSG00000112159  | MDN1         | 0.81 | -1.24 | -0.31 | 9.70E-03 | -1.26E+01 | 1.26E+01 |
| ENSG00000102934  | PLLP         | 1.33 | 1.33  | 0.41  | 1.11E-02 | 1.26E+01  | 1.26E+01 |
| ENSG00000162607  | USP1         | 0.79 | -1.26 | -0.34 | 1.01E-02 | -1.26E+01 | 1.26E+01 |
| ENSG00000140743  | CDR2         | 1.22 | 1.22  | 0.28  | 9.37E-03 | 1.26E+01  | 1.26E+01 |
| ENSG00000164897  | TMUB1        | 0.79 | -1.27 | -0.34 | 1.02E-02 | -1.25E+01 | 1.25E+01 |
| ENSG00000178381  | ZFAND2A      | 1.24 | 1.24  | 0.31  | 9.75E-03 | 1.25E+01  | 1.25E+01 |
| ENSG00000189306  | RRP7A        | 0.82 | -1.22 | -0.29 | 9.53E-03 | -1.25E+01 | 1.25E+01 |
| ENSG00000112578  | BYSL         | 0.79 | -1.26 | -0.34 | 1.02E-02 | -1.25E+01 | 1.25E+01 |
| ENSG00000131724  | IL13RA1      | 1.23 | 1.23  | 0.30  | 9.63E-03 | 1.25E+01  | 1.25E+01 |
| ENSG00000117595  | IRF6         | 1.31 | 1.31  | 0.39  | 1.10E-02 | 1.25E+01  | 1.25E+01 |
| ENSG00000175203  | DCTN2        | 1.23 | 1.23  | 0.30  | 9.68E-03 | 1.25E+01  | 1.25E+01 |
| ENSG00000155099  | TMEM55A      | 0.80 | -1.25 | -0.32 | 9.99E-03 | -1.25E+01 | 1.25E+01 |
| ENSG00000040531  | CTNS         | 0.81 | -1.23 | -0.30 | 9.75E-03 | -1.25E+01 | 1.25E+01 |
| ENSG00000117586  | TNFSF4       | 1.26 | 1.26  | 0.33  | 1.02E-02 | 1.25E+01  | 1.25E+01 |
| ENSG00000083123  | BCKDHB       | 0.82 | -1.22 | -0.29 | 9.65E-03 | -1.25E+01 | 1.25E+01 |
| ENSG000000088247 | KHSRP        | 1.23 | 1.23  | 0.30  | 9.69E-03 | 1.25E+01  | 1.25E+01 |
| ENSG00000131791  | PRKAB2       | 1.21 | 1.21  | 0.28  | 9.49E-03 | 1.25E+01  | 1.25E+01 |
| ENSG00000180318  | ALX1         | 0.72 | -1.39 | -0.47 | 1.24E-02 | -1.24E+01 | 1.24E+01 |
| ENSG00000103042  | SLC38A7      | 1.22 | 1.22  | 0.28  | 9.57E-03 | 1.24E+01  | 1.24E+01 |
| ENSG00000175265  | GOLGA8A      | 0.75 | -1.32 | -0.41 | 1.14E-02 | -1.24E+01 | 1.24E+01 |
| ENSG00000133739  | LRRCC1       | 1.30 | 1.30  | 0.38  | 1.10E-02 | 1.24E+01  | 1.24E+01 |
| ENSG00000105700  | KXD1         | 1.25 | 1.25  | 0.32  | 1.02E-02 | 1.24E+01  | 1.24E+01 |
| ENSG00000197619  | ZNF615       | 1.33 | 1.33  | 0.41  | 1.15E-02 | 1.24E+01  | 1.24E+01 |
| ENSG00000224536  | AC096677.1   | 1.43 | 1.43  | 0.52  | 1.34E-02 | 1.24E+01  | 1.24E+01 |
| ENSG00000201882  | snoU2-30     | 1.41 | 1.41  | 0.50  | 1.30E-02 | 1.24E+01  | 1.24E+01 |
| ENSG00000162032  | SPSB3        | 0.81 | -1.24 | -0.31 | 9.98E-03 | -1.24E+01 | 1.24E+01 |
| ENSG00000137038  | C9orf123     | 1.21 | 1.21  | 0.28  | 9.60E-03 | 1.24E+01  | 1.24E+01 |
| ENSG00000113758  | DBN1         | 1.24 | 1.24  | 0.31  | 1.00E-02 | 1.24E+01  | 1.24E+01 |
| ENSG00000163110  | PDLIM5       | 1.23 | 1.23  | 0.30  | 9.93E-03 | 1.24E+01  | 1.24E+01 |
| ENSG00000204536  | CCHCR1       | 0.80 | -1.25 | -0.33 | 1.03E-02 | -1.23E+01 | 1.23E+01 |
| ENSG00000157106  | SMG1         | 1.23 | 1.23  | 0.30  | 9.88E-03 | 1.23E+01  | 1.23E+01 |
| ENSG00000122026  | RPL21        | 0.81 | -1.24 | -0.31 | 1.00E-02 | -1.23E+01 | 1.23E+01 |
| ENSG00000144366  | GULP1        | 1.25 | 1.25  | 0.32  | 1.03E-02 | 1.23E+01  | 1.23E+01 |
| ENSG00000066923  | STAG3        | 0.71 | -1.41 | -0.50 | 1.31E-02 | -1.23E+01 | 1.23E+01 |
| ENSG00000112210  | RAB23        | 1.22 | 1.22  | 0.28  | 9.75E-03 | 1.23E+01  | 1.23E+01 |
| ENSG00000177728  | KIAA0195     | 1.28 | 1.28  | 0.35  | 1.08E-02 | 1.23E+01  | 1.23E+01 |
| ENSG0000010322   | NISCH        | 1.23 | 1.23  | 0.30  | 1.00E-02 | 1.23E+01  | 1.23E+01 |
| ENSG00000145041  | VPRBP        | 0.81 | -1.23 | -0.30 | 1.00E-02 | -1.23E+01 | 1.23E+01 |
| ENSG00000144228  | SPOPL        | 1.26 | 1.26  | 0.34  | 1.06E-02 | 1.23E+01  | 1.23E+01 |
| ENSG00000134278  | SPIRE1       | 1.23 | 1.23  | 0.30  | 1.01E-02 | 1.23E+01  | 1.23E+01 |
| ENSG00000103150  | MLYCD        | 1.28 | 1.28  | 0.35  | 1.09E-02 | 1.23E+01  | 1.23E+01 |
| ENSG00000139998  | RAB15        | 1.21 | 1.21  | 0.28  | 9.81E-03 | 1.22E+01  | 1.22E+01 |
| ENSG00000168118  | RAB4A        | 0.82 | -1.21 | -0.28 | 9.85E-03 | -1.22E+01 | 1.22E+01 |
| ENSG00000180104  | EXOC3        | 0.83 | -1.21 | -0.27 | 9.73E-03 | -1.22E+01 | 1.22E+01 |
| ENSG00000113448  | PDE4D        | 1.24 | 1.24  | 0.31  | 1.02E-02 | 1.22E+01  | 1.22E+01 |
| ENSG00000011021  | CLCN6        | 1.25 | 1.25  | 0.32  | 1.04E-02 | 1.22E+01  | 1.22E+01 |
| ENSG00000054967  | RELT         | 0.80 | -1.25 | -0.32 | 1.04E-02 | -1.22E+01 | 1.22E+01 |
| ENSG00000143294  | PRCC         | 1.25 | 1.25  | 0.32  | 1.05E-02 | 1.22E+01  | 1.22E+01 |
| ENSG00000119333  | WDR34        | 0.82 | -1.22 | -0.29 | 9.99E-03 | -1.22E+01 | 1.22E+01 |
| ENSG00000154359  | LONRF1       | 0.81 | -1.23 | -0.30 | 1.02E-02 | -1.22E+01 | 1.22E+01 |
| ENSG00000132300  | PTCD3        | 0.82 | -1.22 | -0.29 | 1.01E-02 | -1.22E+01 | 1.22E+01 |
| ENSG00000179943  | FIZ1         | 1.31 | 1.31  | 0.39  | 1.16E-02 | 1.22E+01  | 1.22E+01 |
| ENSG00000166681  | NGFRAP1      | 0.81 | -1.23 | -0.30 | 1.03E-02 | -1.22E+01 | 1.22E+01 |
| ENSG00000147133  | TAF1         | 1.22 | 1.22  | 0.28  | 1.00E-02 | 1.21E+01  | 1.21E+01 |
| ENSG00000143924  | EML4         | 0.82 | -1.22 | -0.29 | 1.01E-02 | -1.21E+01 | 1.21E+01 |
| ENSG00000260565  | ERVK13-1     | 1.26 | 1.26  | 0.33  | 1.08E-02 | 1.21E+01  | 1.21E+01 |
| ENSG00000171943  | SRGAP2C      | 1.33 | 1.33  | 0.41  | 1.21E-02 | 1.21E+01  | 1.21E+01 |
|                  | RP11-15H20.5 | 1.40 | 1.40  | 0.49  | 1.34E-02 | 1.21E+01  | 1.21E+01 |
| ENSG00000083535  | PIBF1        | 1.24 | 1.24  | 0.31  | 1.04E-02 | 1.21E+01  | 1.21E+01 |
| ENSG00000119185  | ITGB1BP1     | 0.82 | -1.22 | -0.29 | 1.02E-02 | -1.21E+01 | 1.21E+01 |
| ENSG00000185344  | ATP6V0A2     | 1.22 | 1.22  | 0.28  | 1.01E-02 | 1.21E+01  | 1.21E+01 |
| ENSG00000170949  | ZNF160       | 1.21 | 1.21  | 0.28  | 1.01E-02 | 1.21E+01  | 1.21E+01 |
| ENSG00000214160  | ALG3         | 1.24 | 1.24  | 0.31  | 1.06E-02 | 1.21E+01  | 1.21E+01 |
| ENSG00000168397  | ATG4B        | 1.21 | 1.21  | 0.27  | 1.00E-02 | 1.21E+01  | 1.21E+01 |
| ENSG00000173275  | ZNF449       | 1.25 | 1.25  | 0.32  | 1.08E-02 | 1.21E+01  | 1.21E+01 |
| ENSG00000130544  | ZNF557       | 1.23 | 1.23  | 0.30  | 1.05E-02 | 1.20E+01  | 1.20E+01 |
| ENSG00000147224  | PRPS1        | 0.83 | -1.21 | -0.28 | 1.02E-02 | -1.20E+01 | 1.20E+01 |
| ENSG00000168883  | USP39        | 0.82 | -1.22 | -0.28 | 1.03E-02 | -1.20E+01 | 1.20E+01 |
| ENSG00000140350  | ANP32A       | 0.81 | -1.23 | -0.30 | 1.05E-02 | -1.20E+01 | 1.20E+01 |
| ENSG00000129691  | ASH2L        | 0.77 | -1.30 | -0.38 | 1.18E-02 | -1.20E+01 | 1.20E+01 |
| ENSG00000015171  | ZMYND11      | 1.22 | 1.22  | 0.29  | 1.04E-02 | 1.20E+01  | 1.20E+01 |
| ENSG00000111731  | KIAA0528     | 0.79 | -1.27 | -0.34 | 1.13E-02 | -1.19E+01 | 1.19E+01 |
| ENSG00000267365  | KCNJ2-AS1    | 1.34 | 1.34  | 0.42  | 1.25E-02 | 1.19E+01  | 1.19E+01 |
| ENSG00000139180  | NDUFA9       | 0.80 | -1.24 | -0.31 | 1.08E-02 | -1.19E+01 | 1.19E+01 |

|                  |               |      |       |       |          |           |          |
|------------------|---------------|------|-------|-------|----------|-----------|----------|
| ENSG00000112110  | MRPL18        | 0.82 | -1.22 | -0.28 | 1.04E-02 | -1.19E+01 | 1.19E+01 |
| ENSG00000157224  | CLDN12        | 1.25 | 1.25  | 0.32  | 1.10E-02 | 1.19E+01  | 1.19E+01 |
| ENSG00000165527  | ARF6          | 0.82 | -1.22 | -0.29 | 1.05E-02 | -1.19E+01 | 1.19E+01 |
| ENSG00000008710  | PKD1          | 1.22 | 1.22  | 0.29  | 1.05E-02 | 1.19E+01  | 1.19E+01 |
| ENSG00000163738  | MTHFD2L       | 1.21 | 1.21  | 0.27  | 1.03E-02 | 1.19E+01  | 1.19E+01 |
| ENSG00000132109  | TRIM21        | 1.21 | 1.21  | 0.27  | 1.04E-02 | 1.19E+01  | 1.19E+01 |
| ENSG00000133884  | DPF2          | 1.21 | 1.21  | 0.28  | 1.04E-02 | 1.19E+01  | 1.19E+01 |
| ENSG00000188994  | ZNF292        | 1.36 | 1.36  | 0.44  | 1.30E-02 | 1.19E+01  | 1.19E+01 |
| ENSG00000100711  | ZFYVE21       | 0.82 | -1.21 | -0.28 | 1.04E-02 | -1.19E+01 | 1.19E+01 |
| ENSG00000104884  | ERCC2         | 0.82 | -1.22 | -0.29 | 1.06E-02 | -1.19E+01 | 1.19E+01 |
| ENSG00000130779  | CLIP1         | 1.26 | 1.26  | 0.34  | 1.14E-02 | 1.18E+01  | 1.18E+01 |
| ENSG00000133114  | KIAA1704      | 0.83 | -1.21 | -0.27 | 1.04E-02 | -1.18E+01 | 1.18E+01 |
| ENSG00000152763  | WDR78         | 1.34 | 1.34  | 0.42  | 1.30E-02 | 1.18E+01  | 1.18E+01 |
| ENSG00000241343  | RPL36A        | 0.80 | -1.26 | -0.33 | 1.14E-02 | -1.18E+01 | 1.18E+01 |
| ENSG00000175198  | PCCA          | 1.21 | 1.21  | 0.28  | 1.07E-02 | 1.17E+01  | 1.17E+01 |
| ENSG00000153815  | CMIP          | 1.29 | 1.29  | 0.37  | 1.21E-02 | 1.17E+01  | 1.17E+01 |
| ENSG00000150630  | VEGFC         | 0.83 | -1.21 | -0.28 | 1.07E-02 | -1.17E+01 | 1.17E+01 |
| ENSG00000102554  | KLF5          | 0.69 | -1.44 | -0.53 | 1.52E-02 | -1.17E+01 | 1.17E+01 |
| ENSG00000170379  | FAM115C       | 0.79 | -1.27 | -0.34 | 1.18E-02 | -1.17E+01 | 1.17E+01 |
| ENSG00000106299  | WASL          | 1.24 | 1.24  | 0.30  | 1.12E-02 | 1.17E+01  | 1.17E+01 |
| ENSG000000087263 | OGFOD1        | 0.82 | -1.22 | -0.29 | 1.09E-02 | -1.17E+01 | 1.17E+01 |
| ENSG00000009307  | CSDE1         | 1.22 | 1.22  | 0.29  | 1.10E-02 | 1.17E+01  | 1.17E+01 |
| ENSG00000115524  | SF3B1         | 1.24 | 1.24  | 0.31  | 1.13E-02 | 1.17E+01  | 1.17E+01 |
| ENSG00000136122  | BORA          | 0.81 | -1.23 | -0.30 | 1.12E-02 | -1.17E+01 | 1.17E+01 |
| ENSG00000164535  | DAGLB         | 0.82 | -1.22 | -0.29 | 1.11E-02 | -1.16E+01 | 1.16E+01 |
| ENSG00000153574  | RPIA          | 0.81 | -1.24 | -0.31 | 1.14E-02 | -1.16E+01 | 1.16E+01 |
| ENSG00000196155  | PLEKHG4       | 1.21 | 1.21  | 0.28  | 1.09E-02 | 1.16E+01  | 1.16E+01 |
| ENSG00000197329  | PELI1         | 1.21 | 1.21  | 0.27  | 1.08E-02 | 1.16E+01  | 1.16E+01 |
| ENSG00000004455  | AK2           | 0.82 | -1.22 | -0.28 | 1.10E-02 | -1.16E+01 | 1.16E+01 |
| ENSG00000224660  | SH3BP5-AS1    | 1.33 | 1.33  | 0.41  | 1.32E-02 | 1.16E+01  | 1.16E+01 |
| ENSG00000133627  | ACTR3B        | 0.75 | -1.33 | -0.41 | 1.31E-02 | -1.16E+01 | 1.16E+01 |
| ENSG00000136908  | DPM2          | 0.81 | -1.24 | -0.31 | 1.14E-02 | -1.16E+01 | 1.16E+01 |
| ENSG00000164054  | SHISA5        | 1.23 | 1.23  | 0.30  | 1.13E-02 | 1.16E+01  | 1.16E+01 |
| ENSG00000164877  | MICALL2       | 1.24 | 1.24  | 0.31  | 1.16E-02 | 1.15E+01  | 1.15E+01 |
| ENSG00000106617  | PRKAG2        | 1.22 | 1.22  | 0.29  | 1.12E-02 | 1.15E+01  | 1.15E+01 |
| ENSG00000144792  | ZNF660        | 0.73 | -1.37 | -0.45 | 1.41E-02 | -1.15E+01 | 1.15E+01 |
| ENSG00000112320  | SOBP          | 1.28 | 1.28  | 0.35  | 1.23E-02 | 1.15E+01  | 1.15E+01 |
| ENSG00000138081  | FBXO11        | 1.21 | 1.21  | 0.28  | 1.11E-02 | 1.15E+01  | 1.15E+01 |
| ENSG00000162231  | NXF1          | 1.30 | 1.30  | 0.38  | 1.28E-02 | 1.15E+01  | 1.15E+01 |
| ENSG00000186468  | RPS23         | 0.80 | -1.25 | -0.32 | 1.18E-02 | -1.15E+01 | 1.15E+01 |
| ENSG00000196935  | SRGAP1        | 1.25 | 1.25  | 0.32  | 1.19E-02 | 1.15E+01  | 1.15E+01 |
| ENSG00000181220  | ZNF746        | 1.24 | 1.24  | 0.31  | 1.17E-02 | 1.15E+01  | 1.15E+01 |
| ENSG00000129946  | SHC2          | 1.32 | 1.32  | 0.40  | 1.33E-02 | 1.14E+01  | 1.14E+01 |
| ENSG00000126107  | HECTD3        | 1.28 | 1.28  | 0.36  | 1.26E-02 | 1.14E+01  | 1.14E+01 |
| ENSG00000189332  | RP11-113D6.10 | 0.80 | -1.24 | -0.31 | 1.19E-02 | -1.14E+01 | 1.14E+01 |
| ENSG00000154719  | MRPL39        | 0.83 | -1.21 | -0.27 | 1.12E-02 | -1.14E+01 | 1.14E+01 |
| ENSG000000084093 | REST          | 1.22 | 1.22  | 0.29  | 1.15E-02 | 1.14E+01  | 1.14E+01 |
| ENSG000000051009 | FAM160A2      | 1.22 | 1.22  | 0.29  | 1.15E-02 | 1.14E+01  | 1.14E+01 |
| ENSG000000099337 | KCNK6         | 0.76 | -1.31 | -0.39 | 1.32E-02 | -1.14E+01 | 1.14E+01 |
| ENSG00000215193  | PEX26         | 0.83 | -1.21 | -0.27 | 1.13E-02 | -1.14E+01 | 1.14E+01 |
| ENSG00000163626  | COX18         | 1.20 | 1.20  | 0.27  | 1.12E-02 | 1.14E+01  | 1.14E+01 |
| ENSG00000140983  | RHOT2         | 0.83 | -1.21 | -0.28 | 1.14E-02 | -1.14E+01 | 1.14E+01 |
| ENSG00000163811  | WDR43         | 0.82 | -1.22 | -0.29 | 1.15E-02 | -1.14E+01 | 1.14E+01 |
| ENSG00000180329  | CCDC43        | 0.83 | -1.21 | -0.27 | 1.14E-02 | -1.13E+01 | 1.13E+01 |
| ENSG00000135250  | SRPK2         | 0.82 | -1.21 | -0.28 | 1.14E-02 | -1.13E+01 | 1.13E+01 |
| ENSG00000115307  | AUP1          | 1.22 | 1.22  | 0.28  | 1.15E-02 | 1.13E+01  | 1.13E+01 |
| ENSG00000115993  | TRAK2         | 1.22 | 1.22  | 0.28  | 1.15E-02 | 1.13E+01  | 1.13E+01 |
| ENSG00000002834  | LASP1         | 1.22 | 1.22  | 0.29  | 1.16E-02 | 1.13E+01  | 1.13E+01 |
| ENSG00000070010  | UFD1L         | 1.22 | 1.22  | 0.28  | 1.16E-02 | 1.13E+01  | 1.13E+01 |
| ENSG00000131019  | ULBP3         | 0.72 | -1.39 | -0.47 | 1.51E-02 | -1.13E+01 | 1.13E+01 |
| ENSG00000259001  | RP11-5N23.2   | 0.72 | -1.40 | -0.48 | 1.53E-02 | -1.13E+01 | 1.13E+01 |
| ENSG00000130052  | RPPH1         | 0.79 | -1.27 | -0.34 | 1.27E-02 | -1.13E+01 | 1.13E+01 |
| ENSG00000170633  | STARD8        | 1.23 | 1.23  | 0.30  | 1.20E-02 | 1.12E+01  | 1.12E+01 |
| ENSG00000121716  | RNF34         | 1.21 | 1.21  | 0.28  | 1.16E-02 | 1.12E+01  | 1.12E+01 |
| ENSG00000143970  | PILRB         | 0.80 | -1.25 | -0.32 | 1.24E-02 | -1.12E+01 | 1.12E+01 |
| ENSG00000090674  | ASXL2         | 1.24 | 1.24  | 0.31  | 1.23E-02 | 1.12E+01  | 1.12E+01 |
| ENSG00000196914  | MCOLN1        | 0.78 | -1.28 | -0.36 | 1.31E-02 | -1.12E+01 | 1.12E+01 |
| ENSG00000103018  | ARHGEF12      | 1.22 | 1.22  | 0.29  | 1.19E-02 | 1.12E+01  | 1.12E+01 |
| ENSG00000170836  | CYB5B         | 0.82 | -1.22 | -0.29 | 1.20E-02 | -1.12E+01 | 1.12E+01 |
| ENSG00000065717  | PPM1D         | 1.21 | 1.21  | 0.27  | 1.17E-02 | 1.12E+01  | 1.12E+01 |
| ENSG00000215068  | TLE2          | 1.24 | 1.24  | 0.31  | 1.24E-02 | 1.12E+01  | 1.12E+01 |
| ENSG00000020426  | AC025171.1    | 0.74 | -1.35 | -0.43 | 1.47E-02 | -1.11E+01 | 1.11E+01 |
| ENSG00000125755  | MNAT1         | 0.83 | -1.20 | -0.26 | 1.16E-02 | -1.11E+01 | 1.11E+01 |
| ENSG00000132024  | SYMPK         | 1.21 | 1.21  | 0.28  | 1.19E-02 | 1.11E+01  | 1.11E+01 |
| ENSG00000163655  | CC2D1A        | 1.31 | 1.31  | 0.39  | 1.38E-02 | 1.11E+01  | 1.11E+01 |
| ENSG00000116285  | GMPS          | 0.82 | -1.22 | -0.29 | 1.21E-02 | -1.11E+01 | 1.11E+01 |
| ENSG00000133393  | ERRFI1        | 0.82 | -1.22 | -0.29 | 1.21E-02 | -1.11E+01 | 1.11E+01 |
| ENSG00000111554  | FOPNL         | 0.83 | -1.21 | -0.27 | 1.19E-02 | -1.11E+01 | 1.11E+01 |
| ENSG00000111554  | MDM1          | 0.80 | -1.24 | -0.31 | 1.26E-02 | -1.11E+01 | 1.11E+01 |

|                  |               |      |       |       |          |           |          |
|------------------|---------------|------|-------|-------|----------|-----------|----------|
| ENSG00000111252  | SH2B3         | 1.23 | 1.23  | 0.30  | 1.24E-02 | 1.11E+01  | 1.11E+01 |
| ENSG00000130703  | OSBPL2        | 1.22 | 1.22  | 0.28  | 1.21E-02 | 1.10E+01  | 1.10E+01 |
| ENSG00000074964  | ARHGEF10L     | 1.28 | 1.28  | 0.35  | 1.34E-02 | 1.10E+01  | 1.10E+01 |
| ENSG00000196739  | COL27A1       | 1.20 | 1.20  | 0.26  | 1.19E-02 | 1.10E+01  | 1.10E+01 |
| ENSG00000236104  | ZBTB22        | 0.81 | -1.23 | -0.30 | 1.25E-02 | -1.10E+01 | 1.10E+01 |
| ENSG00000162222  | TTC9C         | 0.83 | -1.21 | -0.27 | 1.20E-02 | -1.10E+01 | 1.10E+01 |
| ENSG00000074219  | TEAD2         | 0.83 | -1.21 | -0.28 | 1.21E-02 | -1.10E+01 | 1.10E+01 |
| ENSG00000204178  | TMEM57        | 1.21 | 1.21  | 0.27  | 1.21E-02 | 1.10E+01  | 1.10E+01 |
| ENSG00000127184  | COX7C         | 0.80 | -1.24 | -0.31 | 1.29E-02 | -1.10E+01 | 1.10E+01 |
|                  | RP11-65F13.2  | 0.80 | -1.25 | -0.32 | 1.30E-02 | -1.10E+01 | 1.10E+01 |
| ENSG00000152683  | SLC30A6       | 0.83 | -1.20 | -0.27 | 1.20E-02 | -1.10E+01 | 1.10E+01 |
| ENSG00000102189  | EEA1          | 1.39 | 1.39  | 0.48  | 1.61E-02 | 1.09E+01  | 1.09E+01 |
| ENSG00000198373  | WWP2          | 1.26 | 1.26  | 0.33  | 1.33E-02 | 1.09E+01  | 1.09E+01 |
| ENSG00000162129  | CLPB          | 0.82 | -1.22 | -0.29 | 1.25E-02 | -1.09E+01 | 1.09E+01 |
| ENSG00000140464  | PML           | 1.24 | 1.24  | 0.31  | 1.29E-02 | 1.09E+01  | 1.09E+01 |
| ENSG00000180979  | LRRC57        | 0.83 | -1.21 | -0.27 | 1.22E-02 | -1.09E+01 | 1.09E+01 |
| ENSG00000128578  | STRIP2        | 0.83 | -1.21 | -0.27 | 1.22E-02 | -1.09E+01 | 1.09E+01 |
| ENSG00000091073  | DTX2          | 1.31 | 1.31  | 0.38  | 1.44E-02 | 1.09E+01  | 1.09E+01 |
| ENSG00000115649  | CNPPD1        | 1.21 | 1.21  | 0.27  | 1.22E-02 | 1.09E+01  | 1.09E+01 |
| ENSG00000123106  | CCDC91        | 1.24 | 1.24  | 0.31  | 1.30E-02 | 1.09E+01  | 1.09E+01 |
| ENSG00000135974  | C2orf49       | 0.83 | -1.20 | -0.27 | 1.22E-02 | -1.09E+01 | 1.09E+01 |
| ENSG00000117592  | PRDX6         | 0.82 | -1.22 | -0.29 | 1.26E-02 | -1.09E+01 | 1.09E+01 |
| ENSG00000172339  | ALG14         | 0.80 | -1.25 | -0.32 | 1.32E-02 | -1.09E+01 | 1.09E+01 |
| ENSG00000108840  | HDAC5         | 1.23 | 1.23  | 0.29  | 1.27E-02 | 1.09E+01  | 1.09E+01 |
| ENSG00000228106  | RP11-452F19.3 | 1.32 | 1.32  | 0.40  | 1.47E-02 | 1.09E+01  | 1.09E+01 |
| ENSG00000112787  | FBRSL1        | 1.24 | 1.24  | 0.31  | 1.30E-02 | 1.09E+01  | 1.09E+01 |
| ENSG00000176406  | RIMS2         | 0.73 | -1.37 | -0.45 | 1.58E-02 | -1.09E+01 | 1.09E+01 |
| ENSG00000115234  | SNX17         | 0.83 | -1.21 | -0.28 | 1.25E-02 | -1.08E+01 | 1.08E+01 |
| ENSG00000138688  | KIAA1109      | 1.47 | 1.47  | 0.55  | 1.84E-02 | 1.08E+01  | 1.08E+01 |
| ENSG00000138382  | METTL5        | 0.83 | -1.20 | -0.27 | 1.24E-02 | -1.08E+01 | 1.08E+01 |
| ENSG00000122958  | VPS26A        | 1.24 | 1.24  | 0.31  | 1.32E-02 | 1.08E+01  | 1.08E+01 |
| ENSG00000211456  | SACM1L        | 1.20 | 1.20  | 0.26  | 1.24E-02 | 1.08E+01  | 1.08E+01 |
| ENSG00000135164  | DMTF1         | 1.26 | 1.26  | 0.34  | 1.37E-02 | 1.08E+01  | 1.08E+01 |
| ENSG00000171448  | ZBTB26        | 0.75 | -1.34 | -0.42 | 1.54E-02 | -1.08E+01 | 1.08E+01 |
| ENSG00000107897  | ACBD5         | 1.21 | 1.21  | 0.27  | 1.25E-02 | 1.08E+01  | 1.08E+01 |
| ENSG00000179163  | FUCA1         | 1.25 | 1.25  | 0.32  | 1.34E-02 | 1.08E+01  | 1.08E+01 |
| ENSG00000163882  | POLR2H        | 0.82 | -1.22 | -0.28 | 1.28E-02 | -1.08E+01 | 1.08E+01 |
| ENSG00000135046  | ANXA1         | 1.29 | 1.29  | 0.36  | 1.43E-02 | 1.08E+01  | 1.08E+01 |
| ENSG00000185614  | FAM212A       | 1.31 | 1.31  | 0.39  | 1.48E-02 | 1.08E+01  | 1.08E+01 |
| ENSG00000126070  | EIF2C3        | 0.82 | -1.21 | -0.28 | 1.27E-02 | -1.08E+01 | 1.08E+01 |
| ENSG00000140943  | MBTPS1        | 1.24 | 1.24  | 0.31  | 1.34E-02 | 1.08E+01  | 1.08E+01 |
| ENSG00000007520  | TSR3          | 0.83 | -1.20 | -0.26 | 1.25E-02 | -1.07E+01 | 1.07E+01 |
| ENSG00000167136  | ENDOG         | 0.79 | -1.26 | -0.34 | 1.39E-02 | -1.07E+01 | 1.07E+01 |
| ENSG00000140262  | TCF12         | 1.22 | 1.22  | 0.29  | 1.31E-02 | 1.07E+01  | 1.07E+01 |
| ENSG000000032742 | IFT88         | 1.22 | 1.22  | 0.29  | 1.30E-02 | 1.07E+01  | 1.07E+01 |
| ENSG00000047578  | KIAA0556      | 1.23 | 1.23  | 0.30  | 1.32E-02 | 1.07E+01  | 1.07E+01 |
| ENSG00000110063  | DCPS          | 0.80 | -1.25 | -0.33 | 1.37E-02 | -1.07E+01 | 1.07E+01 |
| ENSG00000134146  | ATPBD4        | 1.27 | 1.27  | 0.34  | 1.41E-02 | 1.07E+01  | 1.07E+01 |
| ENSG00000180008  | SOCS4         | 1.28 | 1.28  | 0.36  | 1.44E-02 | 1.07E+01  | 1.07E+01 |
| ENSG00000173230  | GOLGB1        | 1.33 | 1.33  | 0.42  | 1.57E-02 | 1.07E+01  | 1.07E+01 |
| ENSG00000004399  | PLXND1        | 1.22 | 1.22  | 0.28  | 1.30E-02 | 1.07E+01  | 1.07E+01 |
| ENSG00000109270  | LAMTOR3       | 1.21 | 1.21  | 0.27  | 1.29E-02 | 1.06E+01  | 1.06E+01 |
| ENSG00000167118  | URM1          | 1.21 | 1.21  | 0.28  | 1.30E-02 | 1.06E+01  | 1.06E+01 |
| ENSG00000140092  | FBLN5         | 1.31 | 1.31  | 0.39  | 1.52E-02 | 1.06E+01  | 1.06E+01 |
| ENSG00000244509  | APOBEC3C      | 0.66 | -1.52 | -0.60 | 2.04E-02 | -1.06E+01 | 1.06E+01 |
| ENSG00000179094  | PER1          | 0.76 | -1.31 | -0.39 | 1.51E-02 | -1.06E+01 | 1.06E+01 |
| ENSG00000140553  | UNC45A        | 0.82 | -1.22 | -0.28 | 1.31E-02 | -1.06E+01 | 1.06E+01 |
| ENSG00000119703  | ZC2HC1C       | 1.42 | 1.42  | 0.51  | 1.80E-02 | 1.06E+01  | 1.06E+01 |
| ENSG00000135931  | ARMC9         | 1.21 | 1.21  | 0.27  | 1.30E-02 | 1.06E+01  | 1.06E+01 |
| ENSG00000267673  | FDX1L         | 0.81 | -1.23 | -0.30 | 1.35E-02 | -1.06E+01 | 1.06E+01 |
| ENSG00000231925  | TAPBP         | 0.80 | -1.25 | -0.33 | 1.41E-02 | -1.06E+01 | 1.06E+01 |
| ENSG00000166471  | TMEM41B       | 0.81 | -1.23 | -0.30 | 1.35E-02 | -1.06E+01 | 1.06E+01 |
| ENSG00000105856  | HBP1          | 1.22 | 1.22  | 0.29  | 1.33E-02 | 1.06E+01  | 1.06E+01 |
| ENSG00000169223  | LMAN2         | 1.21 | 1.21  | 0.28  | 1.32E-02 | 1.06E+01  | 1.06E+01 |
| ENSG00000176788  | BASP1         | 1.21 | 1.21  | 0.28  | 1.33E-02 | 1.05E+01  | 1.05E+01 |
| ENSG00000013810  | TACC3         | 0.82 | -1.22 | -0.29 | 1.34E-02 | -1.05E+01 | 1.05E+01 |
| ENSG00000128283  | CDC42EP1      | 1.22 | 1.22  | 0.29  | 1.35E-02 | 1.05E+01  | 1.05E+01 |
| ENSG00000145907  | G3BP1         | 0.82 | -1.22 | -0.29 | 1.35E-02 | -1.05E+01 | 1.05E+01 |
| ENSG00000124222  | STX16         | 0.70 | -1.43 | -0.52 | 1.86E-02 | -1.05E+01 | 1.05E+01 |
| ENSG00000255090  | RP11-820L6.1  | 0.70 | -1.43 | -0.51 | 1.85E-02 | -1.05E+01 | 1.05E+01 |
| ENSG00000198034  | RPS4X         | 0.82 | -1.22 | -0.29 | 1.35E-02 | -1.05E+01 | 1.05E+01 |
| ENSG00000165490  | C11orf82      | 0.79 | -1.27 | -0.35 | 1.47E-02 | -1.05E+01 | 1.05E+01 |
| ENSG00000134202  | GSTM3         | 0.83 | -1.20 | -0.27 | 1.31E-02 | -1.05E+01 | 1.05E+01 |
| ENSG00000148296  | SURF6         | 0.83 | -1.21 | -0.27 | 1.33E-02 | -1.05E+01 | 1.05E+01 |
| ENSG00000172239  | PAIP1         | 1.22 | 1.22  | 0.28  | 1.36E-02 | 1.04E+01  | 1.04E+01 |
| ENSG00000091436  | MLTK          | 0.82 | -1.21 | -0.28 | 1.35E-02 | -1.04E+01 | 1.04E+01 |
| ENSG00000224078  | SNHG14        | 1.21 | 1.21  | 0.28  | 1.35E-02 | 1.04E+01  | 1.04E+01 |
| ENSG00000067533  | RRP15         | 0.83 | -1.21 | -0.27 | 1.34E-02 | -1.04E+01 | 1.04E+01 |
| ENSG00000109814  | UGDH          | 0.81 | -1.23 | -0.30 | 1.38E-02 | -1.04E+01 | 1.04E+01 |

|                 |                |      |       |       |          |           |          |
|-----------------|----------------|------|-------|-------|----------|-----------|----------|
| ENSG00000097046 | CDC7           | 0.79 | -1.27 | -0.35 | 1.48E-02 | -1.04E+01 | 1.04E+01 |
| ENSG00000110801 | PSMD9          | 0.83 | -1.21 | -0.27 | 1.35E-02 | -1.04E+01 | 1.04E+01 |
| ENSG00000105323 | HNRNPUL1       | 0.80 | -1.25 | -0.33 | 1.44E-02 | -1.04E+01 | 1.04E+01 |
| ENSG00000146856 | AGBL3          | 0.76 | -1.32 | -0.40 | 1.61E-02 | -1.04E+01 | 1.04E+01 |
| ENSG00000127022 | CANX           | 1.22 | 1.22  | 0.29  | 1.38E-02 | 1.04E+01  | 1.04E+01 |
| ENSG00000101187 | SLCO4A1        | 0.77 | -1.31 | -0.39 | 1.58E-02 | -1.04E+01 | 1.04E+01 |
| ENSG00000260534 | RP11-1006G14.4 | 1.51 | 1.51  | 0.59  | 2.11E-02 | 1.04E+01  | 1.04E+01 |
| ENSG00000105426 | PTPRS          | 1.29 | 1.29  | 0.37  | 1.55E-02 | 1.04E+01  | 1.04E+01 |
| ENSG00000164077 | MON1A          | 0.82 | -1.22 | -0.29 | 1.39E-02 | -1.04E+01 | 1.04E+01 |
| ENSG00000214176 | PLEKHM1P       | 1.24 | 1.24  | 0.31  | 1.43E-02 | 1.04E+01  | 1.04E+01 |
| ENSG00000116962 | NID1           | 1.33 | 1.33  | 0.41  | 1.64E-02 | 1.04E+01  | 1.04E+01 |
| ENSG00000163956 | LRPAP1         | 1.21 | 1.21  | 0.28  | 1.37E-02 | 1.03E+01  | 1.03E+01 |
| ENSG00000130338 | TULP4          | 1.21 | 1.21  | 0.27  | 1.36E-02 | 1.03E+01  | 1.03E+01 |
| ENSG00000011304 | PTBP1          | 1.24 | 1.24  | 0.31  | 1.45E-02 | 1.03E+01  | 1.03E+01 |
| ENSG00000186141 | POLR3C         | 0.83 | -1.20 | -0.26 | 1.36E-02 | -1.03E+01 | 1.03E+01 |
| ENSG00000121879 | PIK3CA         | 1.30 | 1.30  | 0.38  | 1.59E-02 | 1.03E+01  | 1.03E+01 |
| ENSG00000101811 | CSTF2          | 0.83 | -1.20 | -0.26 | 1.35E-02 | -1.03E+01 | 1.03E+01 |
| ENSG00000124177 | CHD6           | 1.23 | 1.23  | 0.29  | 1.41E-02 | 1.03E+01  | 1.03E+01 |
| ENSG00000011143 | MKS1           | 1.23 | 1.23  | 0.30  | 1.42E-02 | 1.03E+01  | 1.03E+01 |
| ENSG00000204767 | FAM196B        | 0.79 | -1.27 | -0.34 | 1.51E-02 | -1.03E+01 | 1.03E+01 |
| ENSG00000164050 | PLXNB1         | 1.22 | 1.22  | 0.28  | 1.40E-02 | 1.03E+01  | 1.03E+01 |
| ENSG00000104381 | GDAP1          | 0.75 | -1.33 | -0.41 | 1.67E-02 | -1.03E+01 | 1.03E+01 |
| ENSG00000156482 | RPL30          | 0.81 | -1.23 | -0.30 | 1.43E-02 | -1.03E+01 | 1.03E+01 |
| ENSG00000148444 | COMMD3         | 1.20 | 1.20  | 0.26  | 1.36E-02 | 1.03E+01  | 1.03E+01 |
| ENSG00000110619 | CARS           | 1.22 | 1.22  | 0.28  | 1.41E-02 | 1.03E+01  | 1.03E+01 |
| ENSG00000239665 | RP11-295P9.3   | 0.75 | -1.34 | -0.42 | 1.71E-02 | -1.03E+01 | 1.03E+01 |
| ENSG00000126254 | RBM42          | 1.21 | 1.21  | 0.27  | 1.39E-02 | 1.03E+01  | 1.03E+01 |
| ENSG00000145916 | RMND5B         | 0.82 | -1.21 | -0.28 | 1.41E-02 | -1.02E+01 | 1.02E+01 |
| ENSG00000147669 | POLR2K         | 0.83 | -1.21 | -0.27 | 1.40E-02 | -1.02E+01 | 1.02E+01 |
|                 | RP11-89C21.2   | 1.32 | 1.32  | 0.40  | 1.68E-02 | 1.02E+01  | 1.02E+01 |
| ENSG00000138326 | RPS24          | 0.81 | -1.24 | -0.31 | 1.47E-02 | -1.02E+01 | 1.02E+01 |
| ENSG00000184634 | MED12          | 0.77 | -1.30 | -0.38 | 1.63E-02 | -1.02E+01 | 1.02E+01 |
| ENSG00000172007 | RAB33B         | 1.21 | 1.21  | 0.27  | 1.41E-02 | 1.02E+01  | 1.02E+01 |
| ENSG00000197892 | KIF13B         | 1.24 | 1.24  | 0.31  | 1.49E-02 | 1.01E+01  | 1.01E+01 |
| ENSG00000158092 | NCK1           | 1.22 | 1.22  | 0.29  | 1.45E-02 | 1.01E+01  | 1.01E+01 |
| ENSG00000075142 | SRI            | 0.82 | -1.21 | -0.28 | 1.43E-02 | -1.01E+01 | 1.01E+01 |
| ENSG00000164056 | SPRY1          | 0.81 | -1.24 | -0.31 | 1.49E-02 | -1.01E+01 | 1.01E+01 |
| ENSG00000173875 | ZNF791         | 1.20 | 1.20  | 0.27  | 1.41E-02 | 1.01E+01  | 1.01E+01 |
| ENSG00000166452 | AKIP1          | 0.83 | -1.20 | -0.27 | 1.41E-02 | -1.01E+01 | 1.01E+01 |
| ENSG00000172775 | FAM192A        | 1.21 | 1.21  | 0.28  | 1.44E-02 | 1.01E+01  | 1.01E+01 |
| ENSG00000105281 | SLC1A5         | 0.81 | -1.23 | -0.30 | 1.48E-02 | -1.01E+01 | 1.01E+01 |
| ENSG00000197355 | UAP1L1         | 1.20 | 1.20  | 0.26  | 1.42E-02 | 1.01E+01  | 1.01E+01 |
| ENSG00000011198 | ABHD5          | 0.83 | -1.20 | -0.27 | 1.42E-02 | -1.01E+01 | 1.01E+01 |
| ENSG00000120675 | DNAJC15        | 0.82 | -1.22 | -0.28 | 1.46E-02 | -1.01E+01 | 1.01E+01 |
| ENSG00000018610 | CXorf56        | 0.83 | -1.20 | -0.27 | 1.43E-02 | -1.01E+01 | 1.01E+01 |
| ENSG00000155111 | CDK19          | 1.21 | 1.21  | 0.28  | 1.46E-02 | 1.00E+01  | 1.00E+01 |
| ENSG00000122484 | RPAP2          | 1.21 | 1.21  | 0.28  | 1.47E-02 | 1.00E+01  | 1.00E+01 |
| ENSG00000079337 | RAPGEF3        | 1.20 | 1.20  | 0.27  | 1.44E-02 | 1.00E+01  | 1.00E+01 |
| ENSG00000180370 | PAK2           | 0.81 | -1.23 | -0.30 | 1.50E-02 | -1.00E+01 | 1.00E+01 |
| ENSG00000005075 | POLR2J         | 0.83 | -1.21 | -0.27 | 1.46E-02 | -1.00E+01 | 1.00E+01 |
| ENSG00000107290 | SETX           | 1.34 | 1.34  | 0.42  | 1.79E-02 | 9.99E+00  | 9.99E+00 |
| ENSG00000037241 | RPL26L1        | 1.22 | 1.22  | 0.28  | 1.49E-02 | 9.99E+00  | 9.99E+00 |
| ENSG00000171530 | TBCA           | 0.82 | -1.23 | -0.29 | 1.51E-02 | -9.99E+00 | 9.99E+00 |
| ENSG00000178229 | ZNF543         | 1.23 | 1.23  | 0.30  | 1.52E-02 | 9.98E+00  | 9.98E+00 |
| ENSG00000197782 | ZNF780A        | 0.80 | -1.24 | -0.32 | 1.56E-02 | -9.98E+00 | 9.98E+00 |
| ENSG00000128923 | FAM63B         | 1.27 | 1.27  | 0.35  | 1.63E-02 | 9.96E+00  | 9.96E+00 |
| ENSG00000130255 | RPL36          | 0.81 | -1.23 | -0.30 | 1.52E-02 | -9.96E+00 | 9.96E+00 |
| ENSG00000145945 | FAM50B         | 1.24 | 1.24  | 0.32  | 1.56E-02 | 9.96E+00  | 9.96E+00 |
| ENSG00000060069 | CTDP1          | 1.20 | 1.20  | 0.27  | 1.46E-02 | 9.95E+00  | 9.95E+00 |
| ENSG00000168255 | POLR2J3        | 0.80 | -1.25 | -0.33 | 1.59E-02 | -9.94E+00 | 9.94E+00 |
| ENSG00000204316 | MRPL38         | 0.69 | -1.44 | -0.53 | 2.11E-02 | -9.94E+00 | 9.94E+00 |
| ENSG00000126777 | KTN1           | 1.27 | 1.27  | 0.34  | 1.63E-02 | 9.93E+00  | 9.93E+00 |
| ENSG00000163923 | RPL39L         | 0.83 | -1.20 | -0.27 | 1.47E-02 | -9.92E+00 | 9.92E+00 |
| ENSG00000172354 | GNB2           | 1.21 | 1.21  | 0.28  | 1.49E-02 | 9.92E+00  | 9.92E+00 |
| ENSG00000198563 | DDX39B         | 0.84 | -1.20 | -0.26 | 1.46E-02 | -9.91E+00 | 9.91E+00 |
| ENSG00000152219 | ARL14EP        | 0.83 | -1.21 | -0.27 | 1.49E-02 | -9.91E+00 | 9.91E+00 |
| ENSG00000187678 | SPRY4          | 1.24 | 1.24  | 0.31  | 1.56E-02 | 9.89E+00  | 9.89E+00 |
| ENSG00000135506 | OS9            | 1.22 | 1.22  | 0.28  | 1.52E-02 | 9.89E+00  | 9.89E+00 |
| ENSG00000170759 | KIF5B          | 1.32 | 1.32  | 0.40  | 1.79E-02 | 9.89E+00  | 9.89E+00 |
| ENSG00000164961 | KIAA0196       | 1.23 | 1.23  | 0.30  | 1.54E-02 | 9.88E+00  | 9.88E+00 |
| ENSG00000148688 | RPP30          | 0.84 | -1.19 | -0.26 | 1.46E-02 | -9.88E+00 | 9.88E+00 |
| ENSG00000138463 | DIRC2          | 1.20 | 1.20  | 0.26  | 1.48E-02 | 9.86E+00  | 9.86E+00 |
| ENSG00000145147 | SLIT2          | 0.83 | -1.21 | -0.28 | 1.51E-02 | -9.86E+00 | 9.86E+00 |
| ENSG00000156521 | TYSND1         | 0.80 | -1.26 | -0.33 | 1.63E-02 | -9.85E+00 | 9.85E+00 |
| ENSG00000270103 | RNU11          | 0.76 | -1.31 | -0.39 | 1.76E-02 | -9.85E+00 | 9.85E+00 |
| ENSG00000081692 | JMJD4          | 0.83 | -1.20 | -0.26 | 1.49E-02 | -9.85E+00 | 9.85E+00 |
| ENSG00000250479 | CHCHD10        | 0.81 | -1.23 | -0.30 | 1.56E-02 | -9.84E+00 | 9.84E+00 |
| ENSG00000088179 | PTPN4          | 1.25 | 1.25  | 0.32  | 1.61E-02 | 9.83E+00  | 9.83E+00 |
| ENSG00000100220 | C22orf28       | 0.83 | -1.21 | -0.27 | 1.51E-02 | -9.82E+00 | 9.82E+00 |

|                 |               |      |       |       |          |           |          |
|-----------------|---------------|------|-------|-------|----------|-----------|----------|
| ENSG00000197044 | ZNF441        | 1.30 | 1.30  | 0.38  | 1.75E-02 | 9.81E+00  | 9.81E+00 |
| ENSG00000159733 | ZFYVE28       | 1.23 | 1.23  | 0.30  | 1.59E-02 | 9.80E+00  | 9.80E+00 |
| ENSG00000101474 | APMAP         | 1.21 | 1.21  | 0.27  | 1.52E-02 | 9.80E+00  | 9.80E+00 |
| ENSG00000273048 | MIR4720       | 0.82 | -1.22 | -0.29 | 1.56E-02 | -9.78E+00 | 9.78E+00 |
| ENSG00000106524 | ANKMY2        | 0.82 | -1.22 | -0.29 | 1.56E-02 | -9.78E+00 | 9.78E+00 |
| ENSG00000198039 | ZNF273        | 0.79 | -1.27 | -0.35 | 1.70E-02 | -9.75E+00 | 9.75E+00 |
| ENSG00000157978 | LDLRAP1       | 0.83 | -1.20 | -0.27 | 1.52E-02 | -9.74E+00 | 9.74E+00 |
| ENSG00000148219 | ASTN2         | 1.23 | 1.23  | 0.29  | 1.59E-02 | 9.73E+00  | 9.73E+00 |
| ENSG00000072135 | PTPN18        | 0.82 | -1.22 | -0.29 | 1.57E-02 | -9.73E+00 | 9.73E+00 |
| ENSG00000116906 | GNPAT         | 1.21 | 1.21  | 0.27  | 1.55E-02 | 9.73E+00  | 9.73E+00 |
| ENSG00000267248 | CTD-2319I12.4 | 1.43 | 1.43  | 0.52  | 2.17E-02 | 9.72E+00  | 9.72E+00 |
| ENSG00000155008 | APOOL         | 1.29 | 1.29  | 0.36  | 1.75E-02 | 9.71E+00  | 9.71E+00 |
| ENSG00000171016 | PYGO1         | 0.81 | -1.24 | -0.31 | 1.63E-02 | -9.70E+00 | 9.70E+00 |
| ENSG00000175040 | CHST2         | 0.80 | -1.25 | -0.32 | 1.66E-02 | -9.70E+00 | 9.70E+00 |
| ENSG00000160298 | C21orf58      | 1.24 | 1.24  | 0.31  | 1.63E-02 | 9.70E+00  | 9.70E+00 |
| ENSG00000064651 | SLC12A2       | 1.24 | 1.24  | 0.31  | 1.64E-02 | 9.69E+00  | 9.69E+00 |
| ENSG00000234616 | JRK           | 0.83 | -1.21 | -0.28 | 1.56E-02 | -9.69E+00 | 9.69E+00 |
| ENSG00000129810 | SGOL1         | 0.81 | -1.23 | -0.30 | 1.62E-02 | -9.69E+00 | 9.69E+00 |
| ENSG00000136158 | SPRY2         | 1.21 | 1.21  | 0.27  | 1.55E-02 | 9.69E+00  | 9.69E+00 |
| ENSG00000145730 | PAM           | 1.22 | 1.22  | 0.29  | 1.59E-02 | 9.68E+00  | 9.68E+00 |
| ENSG00000145685 | LHFPL2        | 1.21 | 1.21  | 0.28  | 1.57E-02 | 9.66E+00  | 9.66E+00 |
| ENSG00000100644 | HIF1A         | 1.28 | 1.28  | 0.35  | 1.75E-02 | 9.66E+00  | 9.66E+00 |
| ENSG00000089053 | ANAPC5        | 0.83 | -1.21 | -0.27 | 1.57E-02 | -9.66E+00 | 9.66E+00 |
| ENSG00000093167 | LRRFIP2       | 0.83 | -1.21 | -0.27 | 1.56E-02 | -9.66E+00 | 9.66E+00 |
| ENSG00000145375 | SPATA5        | 0.83 | -1.20 | -0.26 | 1.55E-02 | -9.64E+00 | 9.64E+00 |
| ENSG00000175395 | ZNF25         | 1.22 | 1.22  | 0.29  | 1.61E-02 | 9.63E+00  | 9.63E+00 |
| ENSG00000178175 | ZNF366        | 0.76 | -1.31 | -0.39 | 1.85E-02 | -9.62E+00 | 9.62E+00 |
| ENSG00000127337 | YEATS4        | 0.84 | -1.20 | -0.26 | 1.55E-02 | -9.61E+00 | 9.61E+00 |
| ENSG00000141526 | SLC16A3       | 0.83 | -1.21 | -0.27 | 1.57E-02 | -9.61E+00 | 9.61E+00 |
| ENSG00000004534 | RBM6          | 0.83 | -1.20 | -0.26 | 1.56E-02 | -9.61E+00 | 9.61E+00 |
| ENSG00000107223 | EDF1          | 0.82 | -1.22 | -0.28 | 1.60E-02 | -9.61E+00 | 9.61E+00 |
| ENSG00000155287 | SLC25A28      | 0.82 | -1.22 | -0.29 | 1.61E-02 | -9.60E+00 | 9.60E+00 |
| ENSG00000173715 | C11orf80      | 1.20 | 1.20  | 0.26  | 1.56E-02 | 9.60E+00  | 9.60E+00 |
| ENSG00000014914 | MTMR11        | 0.75 | -1.33 | -0.41 | 1.93E-02 | -9.60E+00 | 9.60E+00 |
| ENSG00000187098 | MITF          | 1.27 | 1.27  | 0.34  | 1.75E-02 | 9.59E+00  | 9.59E+00 |
| ENSG00000105656 | ELL           | 1.27 | 1.27  | 0.34  | 1.75E-02 | 9.59E+00  | 9.59E+00 |
| ENSG00000198522 | GPN1          | 0.83 | -1.20 | -0.27 | 1.58E-02 | -9.59E+00 | 9.59E+00 |
| ENSG00000239672 | CTD-2086O20.3 | 1.39 | 1.39  | 0.48  | 2.11E-02 | 9.59E+00  | 9.59E+00 |
| ENSG00000060138 | NME1          | 0.82 | -1.21 | -0.28 | 1.60E-02 | -9.58E+00 | 9.58E+00 |
| ENSG00000224189 | CSDA          | 1.22 | 1.22  | 0.28  | 1.61E-02 | 9.58E+00  | 9.58E+00 |
| ENSG00000058729 | HOXD-AS1      | 1.21 | 1.21  | 0.27  | 1.59E-02 | 9.57E+00  | 9.57E+00 |
| ENSG00000224152 | RIOK2         | 0.82 | -1.22 | -0.29 | 1.62E-02 | -9.57E+00 | 9.57E+00 |
| ENSG00000127870 | AC009506.1    | 1.31 | 1.31  | 0.39  | 1.88E-02 | 9.55E+00  | 9.55E+00 |
| ENSG00000100526 | RNF6          | 1.26 | 1.26  | 0.34  | 1.75E-02 | 9.55E+00  | 9.55E+00 |
| ENSG00000256407 | CDKN3         | 0.83 | -1.21 | -0.27 | 1.60E-02 | -9.54E+00 | 9.54E+00 |
| ENSG00000100242 | AL357673.1    | 0.72 | -1.38 | -0.47 | 2.10E-02 | -9.54E+00 | 9.54E+00 |
| ENSG00000133226 | SUN2          | 1.22 | 1.22  | 0.28  | 1.63E-02 | 9.53E+00  | 9.53E+00 |
| ENSG00000135723 | SRRM1         | 0.83 | -1.20 | -0.27 | 1.60E-02 | -9.52E+00 | 9.52E+00 |
| ENSG00000175130 | FHOD1         | 1.25 | 1.25  | 0.32  | 1.71E-02 | 9.52E+00  | 9.52E+00 |
| ENSG00000213593 | MARCKSL1      | 0.83 | -1.21 | -0.27 | 1.61E-02 | -9.52E+00 | 9.52E+00 |
| ENSG00000198113 | TMX2          | 0.83 | -1.20 | -0.26 | 1.59E-02 | -9.52E+00 | 9.52E+00 |
| ENSG00000106560 | TOR4A         | 1.21 | 1.21  | 0.28  | 1.63E-02 | 9.51E+00  | 9.51E+00 |
| ENSG00000125166 | GIMAP2        | 0.81 | -1.23 | -0.30 | 1.67E-02 | -9.50E+00 | 9.50E+00 |
| ENSG00000181666 | GOT2          | 1.30 | 1.30  | 0.38  | 1.87E-02 | 9.50E+00  | 9.50E+00 |
| ENSG00000182827 | HKR1          | 1.20 | 1.20  | 0.26  | 1.59E-02 | 9.49E+00  | 9.49E+00 |
| ENSG00000188021 | ACBD3         | 1.20 | 1.20  | 0.27  | 1.61E-02 | 9.49E+00  | 9.49E+00 |
| ENSG00000120662 | UBQLN2        | 1.22 | 1.22  | 0.28  | 1.64E-02 | 9.49E+00  | 9.49E+00 |
| ENSG00000130304 | MTRF1         | 1.22 | 1.22  | 0.29  | 1.66E-02 | 9.49E+00  | 9.49E+00 |
| ENSG00000152484 | SLC27A1       | 0.80 | -1.25 | -0.32 | 1.74E-02 | -9.48E+00 | 9.48E+00 |
| ENSG00000145545 | USP12         | 1.22 | 1.22  | 0.29  | 1.67E-02 | 9.47E+00  | 9.47E+00 |
| ENSG00000111786 | SRD5A1        | 1.23 | 1.23  | 0.30  | 1.68E-02 | 9.46E+00  | 9.46E+00 |
| ENSG00000102967 | SRSF9         | 0.81 | -1.23 | -0.30 | 1.68E-02 | -9.46E+00 | 9.46E+00 |
| ENSG00000169914 | DHODH         | 0.81 | -1.23 | -0.30 | 1.69E-02 | -9.43E+00 | 9.43E+00 |
| ENSG00000104825 | OTUD3         | 0.82 | -1.21 | -0.28 | 1.66E-02 | -9.42E+00 | 9.42E+00 |
| ENSG00000196449 | NFKBIB        | 1.22 | 1.22  | 0.29  | 1.68E-02 | 9.42E+00  | 9.42E+00 |
| ENSG00000267680 | YRDC          | 1.21 | 1.21  | 0.27  | 1.65E-02 | 9.42E+00  | 9.42E+00 |
| ENSG0000043514  | ZNF224        | 1.21 | 1.21  | 0.27  | 1.65E-02 | 9.41E+00  | 9.41E+00 |
| ENSG00000183309 | TRIT1         | 0.83 | -1.20 | -0.27 | 1.64E-02 | -9.41E+00 | 9.41E+00 |
| ENSG00000112941 | ZNF623        | 1.20 | 1.20  | 0.26  | 1.62E-02 | 9.40E+00  | 9.40E+00 |
| ENSG00000161914 | PAPD7         | 1.21 | 1.21  | 0.28  | 1.67E-02 | 9.40E+00  | 9.40E+00 |
| ENSG00000083845 | ZNF653        | 1.37 | 1.37  | 0.46  | 2.13E-02 | 9.39E+00  | 9.39E+00 |
| ENSG00000271303 | RPS5          | 0.82 | -1.21 | -0.28 | 1.67E-02 | -9.39E+00 | 9.39E+00 |
| ENSG00000233183 | SRXN1         | 1.21 | 1.21  | 0.27  | 1.65E-02 | 9.38E+00  | 9.38E+00 |
| ENSG00000075413 | RP3-468B3.2   | 1.40 | 1.40  | 0.48  | 2.22E-02 | 9.38E+00  | 9.38E+00 |
| ENSG00000172409 | YTHDC1        | 1.20 | 1.20  | 0.26  | 1.64E-02 | 9.38E+00  | 9.38E+00 |
| ENSG00000161999 | MARK3         | 1.20 | 1.20  | 0.27  | 1.65E-02 | 9.36E+00  | 9.36E+00 |
|                 | PAPD5         | 1.19 | 1.19  | 0.26  | 1.63E-02 | 9.35E+00  | 9.35E+00 |
|                 | CLP1          | 0.82 | -1.22 | -0.28 | 1.69E-02 | -9.35E+00 | 9.35E+00 |
|                 | JMJD8         | 0.82 | -1.21 | -0.28 | 1.69E-02 | -9.34E+00 | 9.34E+00 |

|                  |               |      |       |       |          |           |          |
|------------------|---------------|------|-------|-------|----------|-----------|----------|
| ENSG00000101745  | ANKRD12       | 0.82 | -1.23 | -0.29 | 1.73E-02 | -9.33E+00 | 9.33E+00 |
| ENSG00000093000  | NUP50         | 0.83 | -1.21 | -0.27 | 1.67E-02 | -9.33E+00 | 9.33E+00 |
| ENSG00000108352  | RAPGEFL1      | 0.71 | -1.40 | -0.49 | 2.27E-02 | -9.32E+00 | 9.32E+00 |
| ENSG00000028528  | SNX1          | 0.83 | -1.21 | -0.28 | 1.69E-02 | -9.30E+00 | 9.30E+00 |
| ENSG00000075711  | DLG1          | 0.83 | -1.20 | -0.27 | 1.68E-02 | -9.29E+00 | 9.29E+00 |
| ENSG00000004660  | CAMKK1        | 0.78 | -1.28 | -0.35 | 1.90E-02 | -9.26E+00 | 9.26E+00 |
| ENSG00000136114  | THSD1         | 1.19 | 1.19  | 0.25  | 1.66E-02 | 9.25E+00  | 9.25E+00 |
| ENSG00000134531  | EMP1          | 1.22 | 1.22  | 0.29  | 1.74E-02 | 9.25E+00  | 9.25E+00 |
| ENSG00000178996  | SNX18         | 1.21 | 1.21  | 0.28  | 1.71E-02 | 9.24E+00  | 9.24E+00 |
| ENSG000000198176 | TFDP1         | 0.82 | -1.22 | -0.29 | 1.74E-02 | -9.24E+00 | 9.24E+00 |
| ENSG00000196236  | XPNPEP3       | 1.19 | 1.19  | 0.25  | 1.67E-02 | 9.24E+00  | 9.24E+00 |
| ENSG00000099326  | MZF1          | 1.24 | 1.24  | 0.31  | 1.81E-02 | 9.24E+00  | 9.24E+00 |
|                  | RP11-571M6.6  | 0.82 | -1.22 | -0.29 | 1.75E-02 | -9.23E+00 | 9.23E+00 |
| ENSG00000143811  | PYCR2         | 0.84 | -1.19 | -0.25 | 1.67E-02 | -9.23E+00 | 9.23E+00 |
| ENSG00000052723  | SIKE1         | 0.83 | -1.21 | -0.27 | 1.71E-02 | -9.22E+00 | 9.22E+00 |
| ENSG00000149541  | B3GAT3        | 0.83 | -1.21 | -0.28 | 1.73E-02 | -9.22E+00 | 9.22E+00 |
| ENSG00000182197  | EXT1          | 1.21 | 1.21  | 0.27  | 1.71E-02 | 9.21E+00  | 9.21E+00 |
| ENSG00000211460  | TSN           | 0.83 | -1.21 | -0.28 | 1.73E-02 | -9.21E+00 | 9.21E+00 |
| ENSG00000117523  | PRRC2C        | 1.22 | 1.22  | 0.28  | 1.74E-02 | 9.21E+00  | 9.21E+00 |
| ENSG00000258920  | FOXN3-AS1     | 1.38 | 1.38  | 0.47  | 2.26E-02 | 9.20E+00  | 9.20E+00 |
|                  | RP11-322M19.1 | 0.83 | -1.20 | -0.26 | 1.70E-02 | -9.19E+00 | 9.19E+00 |
| ENSG00000072310  | SREBF1        | 1.20 | 1.20  | 0.27  | 1.72E-02 | 9.18E+00  | 9.18E+00 |
| ENSG00000100280  | AP1B1         | 1.23 | 1.23  | 0.30  | 1.80E-02 | 9.18E+00  | 9.18E+00 |
| ENSG00000170390  | DCLK2         | 1.31 | 1.31  | 0.39  | 2.03E-02 | 9.17E+00  | 9.17E+00 |
| ENSG00000181090  | EHMT1         | 1.21 | 1.21  | 0.27  | 1.74E-02 | 9.17E+00  | 9.17E+00 |
| ENSG00000167528  | ZNF641        | 0.78 | -1.28 | -0.35 | 1.94E-02 | -9.17E+00 | 9.17E+00 |
| ENSG00000010803  | SCMH1         | 0.83 | -1.20 | -0.26 | 1.71E-02 | -9.16E+00 | 9.16E+00 |
| ENSG00000089280  | FUS           | 0.82 | -1.22 | -0.29 | 1.78E-02 | -9.15E+00 | 9.15E+00 |
| ENSG00000171466  | ZNF562        | 0.84 | -1.19 | -0.25 | 1.70E-02 | -9.14E+00 | 9.14E+00 |
| ENSG00000106009  | BRAT1         | 1.21 | 1.21  | 0.27  | 1.75E-02 | 9.13E+00  | 9.13E+00 |
| ENSG00000115935  | WIPF1         | 1.22 | 1.22  | 0.29  | 1.79E-02 | 9.12E+00  | 9.12E+00 |
| ENSG00000125170  | DOK4          | 0.83 | -1.20 | -0.27 | 1.74E-02 | -9.12E+00 | 9.12E+00 |
| ENSG00000203727  | SAMD5         | 0.83 | -1.20 | -0.26 | 1.74E-02 | -9.11E+00 | 9.11E+00 |
| ENSG00000234444  | ZNF736        | 0.76 | -1.31 | -0.39 | 2.07E-02 | -9.09E+00 | 9.09E+00 |
| ENSG00000187566  | NHLRC1        | 1.34 | 1.34  | 0.42  | 2.17E-02 | 9.08E+00  | 9.08E+00 |
| ENSG00000007047  | MARK4         | 1.21 | 1.21  | 0.28  | 1.78E-02 | 9.07E+00  | 9.07E+00 |
| ENSG00000130489  | SCO2          | 0.82 | -1.22 | -0.28 | 1.80E-02 | -9.07E+00 | 9.07E+00 |
| ENSG00000134014  | ELP3          | 0.84 | -1.19 | -0.25 | 1.73E-02 | -9.07E+00 | 9.07E+00 |
| ENSG00000213516  | RBMXL1        | 0.83 | -1.20 | -0.26 | 1.76E-02 | -9.06E+00 | 9.06E+00 |
| ENSG00000090447  | TFAP4         | 0.80 | -1.26 | -0.33 | 1.92E-02 | -9.06E+00 | 9.06E+00 |
| ENSG00000188171  | ZNF626        | 1.25 | 1.25  | 0.32  | 1.89E-02 | 9.06E+00  | 9.06E+00 |
| ENSG00000118503  | TNFAIP3       | 1.33 | 1.33  | 0.41  | 2.16E-02 | 9.04E+00  | 9.04E+00 |
| ENSG00000167553  | TUBA1C        | 0.83 | -1.21 | -0.28 | 1.79E-02 | -9.04E+00 | 9.04E+00 |
| ENSG00000173113  | TRMT112       | 0.83 | -1.21 | -0.27 | 1.79E-02 | -9.03E+00 | 9.03E+00 |
| ENSG00000066084  | DIP2B         | 1.21 | 1.21  | 0.28  | 1.80E-02 | 9.03E+00  | 9.03E+00 |
| ENSG00000229152  | ANKRD10-IT1   | 0.76 | -1.32 | -0.40 | 2.14E-02 | -9.03E+00 | 9.03E+00 |
| ENSG00000217555  | CKLF          | 0.82 | -1.22 | -0.28 | 1.82E-02 | -9.02E+00 | 9.02E+00 |
| ENSG00000084774  | CAD           | 0.79 | -1.26 | -0.34 | 1.97E-02 | -8.99E+00 | 8.99E+00 |
| ENSG00000131845  | ZNF304        | 1.20 | 1.20  | 0.27  | 1.79E-02 | 8.99E+00  | 8.99E+00 |
| ENSG00000160993  | ALKBH4        | 0.81 | -1.23 | -0.30 | 1.89E-02 | -8.98E+00 | 8.98E+00 |
| ENSG00000137193  | PIM1          | 0.81 | -1.23 | -0.30 | 1.88E-02 | -8.97E+00 | 8.97E+00 |
| ENSG00000158161  | EYA3          | 0.84 | -1.19 | -0.25 | 1.77E-02 | -8.97E+00 | 8.97E+00 |
| ENSG00000135720  | DYNCL1I2      | 1.21 | 1.21  | 0.27  | 1.81E-02 | 8.96E+00  | 8.96E+00 |
| ENSG00000119711  | ALDH6A1       | 0.84 | -1.19 | -0.26 | 1.78E-02 | -8.95E+00 | 8.95E+00 |
| ENSG00000164574  | GALNT10       | 1.21 | 1.21  | 0.27  | 1.83E-02 | 8.93E+00  | 8.93E+00 |
| ENSG00000125841  | NRSN2         | 0.83 | -1.20 | -0.27 | 1.82E-02 | -8.92E+00 | 8.92E+00 |
| ENSG00000203485  | INF2          | 1.20 | 1.20  | 0.26  | 1.80E-02 | 8.92E+00  | 8.92E+00 |
| ENSG00000256223  | ZNF10         | 1.32 | 1.32  | 0.40  | 2.19E-02 | 8.92E+00  | 8.92E+00 |
| ENSG00000157510  | AFAP1L1       | 1.21 | 1.21  | 0.28  | 1.84E-02 | 8.92E+00  | 8.92E+00 |
| ENSG00000144736  | SHQ1          | 0.84 | -1.20 | -0.26 | 1.80E-02 | -8.91E+00 | 8.91E+00 |
| ENSG00000049759  | NEDD4L        | 1.21 | 1.21  | 0.28  | 1.85E-02 | 8.90E+00  | 8.90E+00 |
| ENSG00000139549  | DHH           | 1.32 | 1.32  | 0.41  | 2.22E-02 | 8.89E+00  | 8.89E+00 |
| ENSG00000113716  | HMGXB3        | 1.20 | 1.20  | 0.26  | 1.82E-02 | 8.89E+00  | 8.89E+00 |
| ENSG00000141337  | ARSG          | 0.78 | -1.28 | -0.36 | 2.07E-02 | -8.89E+00 | 8.89E+00 |
| ENSG00000074695  | LMAN1         | 1.25 | 1.25  | 0.33  | 2.00E-02 | 8.86E+00  | 8.86E+00 |
| ENSG00000110090  | CPT1A         | 0.82 | -1.22 | -0.29 | 1.91E-02 | -8.86E+00 | 8.86E+00 |
| ENSG00000140391  | TSPAN3        | 1.21 | 1.21  | 0.27  | 1.86E-02 | 8.85E+00  | 8.85E+00 |
|                  | CTD-2339L15.1 | 1.33 | 1.33  | 0.41  | 2.25E-02 | 8.85E+00  | 8.85E+00 |
| ENSG00000178567  | EPM2AIP1      | 1.20 | 1.20  | 0.27  | 1.86E-02 | 8.84E+00  | 8.84E+00 |
| ENSG00000159256  | MORC3         | 1.23 | 1.23  | 0.30  | 1.95E-02 | 8.82E+00  | 8.82E+00 |
| ENSG00000117153  | KLHL12        | 0.84 | -1.19 | -0.25 | 1.83E-02 | -8.80E+00 | 8.80E+00 |
| ENSG00000146067  | FAM193B       | 0.84 | -1.20 | -0.26 | 1.85E-02 | -8.79E+00 | 8.79E+00 |
| ENSG00000090565  | RAB11FIP3     | 0.84 | -1.19 | -0.25 | 1.83E-02 | -8.79E+00 | 8.79E+00 |
| ENSG00000144867  | SRPRB         | 0.83 | -1.20 | -0.26 | 1.87E-02 | -8.79E+00 | 8.79E+00 |
| ENSG00000116957  | TBCE          | 0.84 | -1.20 | -0.26 | 1.86E-02 | -8.79E+00 | 8.79E+00 |
| ENSG00000198301  | SDAD1         | 1.20 | 1.20  | 0.27  | 1.87E-02 | 8.79E+00  | 8.79E+00 |
| ENSG00000059145  | UNKL          | 1.22 | 1.22  | 0.28  | 1.91E-02 | 8.78E+00  | 8.78E+00 |
| ENSG00000125826  | RBCK1         | 1.19 | 1.19  | 0.25  | 1.85E-02 | 8.76E+00  | 8.76E+00 |
| ENSG00000116525  | TRIM62        | 1.35 | 1.35  | 0.43  | 2.38E-02 | 8.75E+00  | 8.75E+00 |

|                 |               |      |       |       |          |           |          |
|-----------------|---------------|------|-------|-------|----------|-----------|----------|
| ENSG00000105245 | NUMBL         | 1.23 | 1.23  | 0.30  | 2.00E-02 | 8.74E+00  | 8.74E+00 |
| ENSG00000105429 | MEGF8         | 1.21 | 1.21  | 0.27  | 1.91E-02 | 8.74E+00  | 8.74E+00 |
| ENSG00000178338 | ZNF354B       | 1.21 | 1.21  | 0.27  | 1.90E-02 | 8.74E+00  | 8.74E+00 |
| ENSG00000242802 | AP5Z1         | 1.19 | 1.19  | 0.25  | 1.87E-02 | 8.73E+00  | 8.73E+00 |
| ENSG00000108010 | GLRX3         | 1.20 | 1.20  | 0.26  | 1.89E-02 | 8.73E+00  | 8.73E+00 |
| ENSG00000080986 | NDC80         | 0.82 | -1.22 | -0.29 | 1.95E-02 | -8.73E+00 | 8.73E+00 |
| ENSG00000165121 | RP11-213G2.3  | 0.71 | -1.40 | -0.48 | 2.58E-02 | -8.72E+00 | 8.72E+00 |
| ENSG00000112531 | QKI           | 1.20 | 1.20  | 0.27  | 1.91E-02 | 8.71E+00  | 8.71E+00 |
| ENSG00000062716 | VMP1          | 1.22 | 1.22  | 0.28  | 1.95E-02 | 8.71E+00  | 8.71E+00 |
| ENSG00000118507 | AKAP7         | 0.79 | -1.27 | -0.34 | 2.11E-02 | -8.71E+00 | 8.71E+00 |
| ENSG00000258301 | RP11-488C13.5 | 1.35 | 1.35  | 0.44  | 2.42E-02 | 8.71E+00  | 8.71E+00 |
| ENSG00000180626 | ZNF594        | 1.25 | 1.25  | 0.33  | 2.07E-02 | 8.71E+00  | 8.71E+00 |
| ENSG00000134809 | TIMM10        | 0.83 | -1.20 | -0.27 | 1.91E-02 | -8.71E+00 | 8.71E+00 |
| ENSG00000100271 | TTL1          | 1.23 | 1.23  | 0.29  | 1.99E-02 | 8.69E+00  | 8.69E+00 |
| ENSG00000228801 | RP11-110G21.1 | 1.46 | 1.46  | 0.54  | 2.82E-02 | 8.68E+00  | 8.68E+00 |
| ENSG00000126858 | RHOT1         | 0.84 | -1.19 | -0.25 | 1.88E-02 | -8.68E+00 | 8.68E+00 |
| ENSG00000126775 | ATG14         | 1.19 | 1.19  | 0.25  | 1.88E-02 | 8.68E+00  | 8.68E+00 |
| ENSG00000171723 | GPHN          | 0.81 | -1.24 | -0.31 | 2.03E-02 | -8.68E+00 | 8.68E+00 |
| ENSG00000112079 | STK38         | 1.19 | 1.19  | 0.25  | 1.90E-02 | 8.66E+00  | 8.66E+00 |
| ENSG00000152475 | ZNF837        | 1.38 | 1.38  | 0.46  | 2.52E-02 | 8.66E+00  | 8.66E+00 |
| ENSG00000168314 | MOBP          | 1.41 | 1.41  | 0.49  | 2.65E-02 | 8.65E+00  | 8.65E+00 |
| ENSG00000117650 | NEK2          | 0.81 | -1.24 | -0.31 | 2.05E-02 | -8.64E+00 | 8.64E+00 |
| ENSG00000215630 | GUSBP9        | 1.40 | 1.40  | 0.49  | 2.63E-02 | 8.63E+00  | 8.63E+00 |
| ENSG00000086758 | HUWE1         | 1.25 | 1.25  | 0.32  | 2.09E-02 | 8.62E+00  | 8.62E+00 |
| ENSG00000176890 | TYMS          | 0.81 | -1.24 | -0.31 | 2.07E-02 | -8.61E+00 | 8.61E+00 |
| ENSG00000185189 | NRBP2         | 0.80 | -1.24 | -0.32 | 2.09E-02 | -8.61E+00 | 8.61E+00 |
| ENSG00000072682 | P4HA2         | 1.20 | 1.20  | 0.26  | 1.94E-02 | 8.61E+00  | 8.61E+00 |
| ENSG00000197124 | ZNF682        | 0.77 | -1.29 | -0.37 | 2.26E-02 | -8.60E+00 | 8.60E+00 |
| ENSG00000122203 | KIAA1191      | 1.20 | 1.20  | 0.26  | 1.94E-02 | 8.60E+00  | 8.60E+00 |
| ENSG00000107021 | TBC1D13       | 0.83 | -1.20 | -0.26 | 1.95E-02 | -8.58E+00 | 8.58E+00 |
| ENSG00000152382 | TADA1         | 0.83 | -1.21 | -0.27 | 1.99E-02 | -8.57E+00 | 8.57E+00 |
| ENSG00000214870 | AC004540.5    | 0.74 | -1.36 | -0.44 | 2.51E-02 | -8.56E+00 | 8.56E+00 |
| ENSG00000127952 | STYXL1        | 0.84 | -1.19 | -0.26 | 1.94E-02 | -8.56E+00 | 8.56E+00 |
| ENSG00000138829 | FBN2          | 1.26 | 1.26  | 0.33  | 2.17E-02 | 8.53E+00  | 8.53E+00 |
| ENSG00000100802 | C14orf93      | 1.24 | 1.24  | 0.30  | 2.10E-02 | 8.52E+00  | 8.52E+00 |
| ENSG00000134802 | SLC43A3       | 1.20 | 1.20  | 0.26  | 1.97E-02 | 8.52E+00  | 8.52E+00 |
| ENSG00000088766 | CRLS1         | 0.84 | -1.19 | -0.25 | 1.95E-02 | -8.51E+00 | 8.51E+00 |
| ENSG00000100239 | PPP6R2        | 0.84 | -1.19 | -0.25 | 1.97E-02 | -8.50E+00 | 8.50E+00 |
| ENSG00000152439 | ZNF773        | 1.26 | 1.26  | 0.33  | 2.20E-02 | 8.50E+00  | 8.50E+00 |
| ENSG00000258441 | LINC00641     | 0.82 | -1.21 | -0.28 | 2.04E-02 | -8.48E+00 | 8.48E+00 |
| ENSG00000162298 | SYVN1         | 1.25 | 1.25  | 0.32  | 2.17E-02 | 8.47E+00  | 8.47E+00 |
| ENSG00000178385 | PLEKHM3       | 1.25 | 1.25  | 0.32  | 2.19E-02 | 8.46E+00  | 8.46E+00 |
| ENSG00000204520 | MICA          | 0.82 | -1.22 | -0.28 | 2.07E-02 | -8.46E+00 | 8.46E+00 |
|                 | RP11-383J24.5 | 1.34 | 1.34  | 0.42  | 2.51E-02 | 8.45E+00  | 8.45E+00 |
| ENSG00000102738 | MRPS31        | 0.84 | -1.19 | -0.25 | 2.00E-02 | -8.44E+00 | 8.44E+00 |
| ENSG00000114861 | FOXP1         | 0.83 | -1.21 | -0.27 | 2.05E-02 | -8.43E+00 | 8.43E+00 |
| ENSG00000090621 | PABPC4        | 1.21 | 1.21  | 0.27  | 2.05E-02 | 8.42E+00  | 8.42E+00 |
| ENSG00000130175 | PRKCSH        | 1.33 | 1.33  | 0.42  | 2.52E-02 | 8.41E+00  | 8.41E+00 |
| ENSG00000129347 | KRI1          | 0.82 | -1.22 | -0.29 | 2.10E-02 | -8.41E+00 | 8.41E+00 |
| ENSG00000111667 | USP5          | 0.83 | -1.20 | -0.26 | 2.04E-02 | -8.41E+00 | 8.41E+00 |
| ENSG00000132840 | BHMT2         | 0.68 | -1.46 | -0.55 | 3.03E-02 | -8.40E+00 | 8.40E+00 |
| ENSG00000085978 | ATG16L1       | 1.19 | 1.19  | 0.25  | 2.01E-02 | 8.40E+00  | 8.40E+00 |
| ENSG00000089693 | MLF2          | 0.84 | -1.19 | -0.25 | 2.01E-02 | -8.39E+00 | 8.39E+00 |
| ENSG00000171603 | CLSTN1        | 1.22 | 1.22  | 0.29  | 2.12E-02 | 8.39E+00  | 8.39E+00 |
| ENSG00000111206 | FOXO1         | 1.27 | 1.27  | 0.34  | 2.28E-02 | 8.38E+00  | 8.38E+00 |
| ENSG00000123684 | LPGAT1        | 1.20 | 1.20  | 0.26  | 2.05E-02 | 8.38E+00  | 8.38E+00 |
| ENSG00000153885 | KCTD15        | 0.84 | -1.18 | -0.24 | 1.99E-02 | -8.38E+00 | 8.38E+00 |
| ENSG00000100813 | ACIN1         | 0.83 | -1.20 | -0.26 | 2.06E-02 | -8.38E+00 | 8.38E+00 |
| ENSG00000157764 | BRAF          | 1.20 | 1.20  | 0.26  | 2.04E-02 | 8.38E+00  | 8.38E+00 |
| ENSG00000100281 | HMGXB4        | 0.83 | -1.20 | -0.26 | 2.06E-02 | -8.37E+00 | 8.37E+00 |
| ENSG00000105173 | CCNE1         | 0.83 | -1.20 | -0.26 | 2.06E-02 | -8.36E+00 | 8.36E+00 |
| ENSG00000164506 | STXBP5        | 1.19 | 1.19  | 0.25  | 2.02E-02 | 8.36E+00  | 8.36E+00 |
| ENSG00000187109 | NAP1L1        | 0.83 | -1.20 | -0.27 | 2.08E-02 | -8.36E+00 | 8.36E+00 |
| ENSG00000157379 | DHRS1         | 0.80 | -1.25 | -0.32 | 2.23E-02 | -8.35E+00 | 8.35E+00 |
| ENSG00000011243 | AKAP8L        | 1.19 | 1.19  | 0.26  | 2.05E-02 | 8.34E+00  | 8.34E+00 |
| ENSG00000204256 | BRD2          | 1.20 | 1.20  | 0.26  | 2.06E-02 | 8.34E+00  | 8.34E+00 |
| ENSG00000087842 | PIR           | 1.20 | 1.20  | 0.27  | 2.09E-02 | 8.33E+00  | 8.33E+00 |
| ENSG00000168675 | LDLRAD4       | 1.33 | 1.33  | 0.41  | 2.56E-02 | 8.33E+00  | 8.33E+00 |
| ENSG00000109320 | NFKB1         | 0.84 | -1.20 | -0.26 | 2.07E-02 | -8.33E+00 | 8.33E+00 |
| ENSG00000158483 | FAM86C1       | 1.29 | 1.29  | 0.37  | 2.40E-02 | 8.31E+00  | 8.31E+00 |
| ENSG00000086598 | TMED2         | 0.82 | -1.21 | -0.28 | 2.14E-02 | -8.31E+00 | 8.31E+00 |
| ENSG00000224597 | RP11-534G20.3 | 1.19 | 1.19  | 0.25  | 2.04E-02 | 8.31E+00  | 8.31E+00 |
| ENSG00000184058 | TBX1          | 1.31 | 1.31  | 0.39  | 2.47E-02 | 8.31E+00  | 8.31E+00 |
| ENSG00000175701 | LINC00116     | 0.83 | -1.21 | -0.27 | 2.12E-02 | -8.30E+00 | 8.30E+00 |
| ENSG00000151176 | PLBD2         | 1.24 | 1.24  | 0.30  | 2.22E-02 | 8.30E+00  | 8.30E+00 |
| ENSG00000122642 | FKBP9         | 1.19 | 1.19  | 0.25  | 2.07E-02 | 8.29E+00  | 8.29E+00 |
| ENSG00000092929 | UNC13D        | 1.40 | 1.40  | 0.48  | 2.85E-02 | 8.28E+00  | 8.28E+00 |
| ENSG00000082641 | NFE2L1        | 1.20 | 1.20  | 0.26  | 2.10E-02 | 8.27E+00  | 8.27E+00 |
| ENSG00000140332 | TLE3          | 1.21 | 1.21  | 0.27  | 2.14E-02 | 8.26E+00  | 8.26E+00 |

|                 |               |      |       |       |          |           |          |
|-----------------|---------------|------|-------|-------|----------|-----------|----------|
| ENSG00000101407 | TTI1          | 0.83 | -1.20 | -0.26 | 2.11E-02 | -8.26E+00 | 8.26E+00 |
| ENSG00000169621 | APLF          | 1.25 | 1.25  | 0.32  | 2.28E-02 | 8.25E+00  | 8.25E+00 |
| ENSG00000115540 | MOB4          | 1.20 | 1.20  | 0.27  | 2.13E-02 | 8.25E+00  | 8.25E+00 |
| ENSG00000128652 | HOXD3         | 0.81 | -1.23 | -0.30 | 2.23E-02 | -8.22E+00 | 8.22E+00 |
| ENSG00000115020 | PIKFYVE       | 1.21 | 1.21  | 0.28  | 2.17E-02 | 8.21E+00  | 8.21E+00 |
| ENSG00000124299 | PEPD          | 1.20 | 1.20  | 0.26  | 2.12E-02 | 8.21E+00  | 8.21E+00 |
| ENSG00000143256 | PFDN2         | 0.84 | -1.18 | -0.24 | 2.08E-02 | -8.21E+00 | 8.21E+00 |
| ENSG00000197818 | SLC9A8        | 1.21 | 1.21  | 0.28  | 2.19E-02 | 8.20E+00  | 8.20E+00 |
| ENSG00000132432 | SEC61G        | 0.78 | -1.28 | -0.35 | 2.43E-02 | -8.20E+00 | 8.20E+00 |
| ENSG00000189042 | ZNF567        | 1.22 | 1.22  | 0.29  | 2.23E-02 | 8.20E+00  | 8.20E+00 |
| ENSG00000134186 | PRPF38B       | 0.83 | -1.20 | -0.27 | 2.16E-02 | -8.19E+00 | 8.19E+00 |
| ENSG00000164292 | RHOBTB3       | 1.20 | 1.20  | 0.26  | 2.14E-02 | 8.19E+00  | 8.19E+00 |
| ENSG00000109475 | RPL34         | 0.82 | -1.22 | -0.29 | 2.23E-02 | -8.19E+00 | 8.19E+00 |
| ENSG00000204498 | NFKBIL1       | 1.21 | 1.21  | 0.27  | 2.17E-02 | 8.19E+00  | 8.19E+00 |
| ENSG00000100567 | PSMA3         | 0.84 | -1.20 | -0.26 | 2.14E-02 | -8.17E+00 | 8.17E+00 |
| ENSG00000129084 | PSMA1         | 0.83 | -1.20 | -0.27 | 2.18E-02 | -8.15E+00 | 8.15E+00 |
| ENSG00000187815 | ZNF642        | 0.80 | -1.26 | -0.33 | 2.37E-02 | -8.15E+00 | 8.15E+00 |
| ENSG00000115204 | MPV17         | 1.19 | 1.19  | 0.25  | 2.13E-02 | 8.15E+00  | 8.15E+00 |
| ENSG00000233565 | AC007690.1    | 0.74 | -1.36 | -0.44 | 2.78E-02 | -8.14E+00 | 8.14E+00 |
| ENSG00000124523 | SIRT5         | 1.20 | 1.20  | 0.26  | 2.16E-02 | 8.14E+00  | 8.14E+00 |
| ENSG00000059804 | SLC2A3        | 1.19 | 1.19  | 0.25  | 2.14E-02 | 8.13E+00  | 8.13E+00 |
| ENSG00000164134 | NAA15         | 1.24 | 1.24  | 0.31  | 2.33E-02 | 8.13E+00  | 8.13E+00 |
| ENSG00000164296 | TIGD6         | 1.23 | 1.23  | 0.30  | 2.29E-02 | 8.12E+00  | 8.12E+00 |
| ENSG00000115896 | PLCL1         | 1.26 | 1.26  | 0.34  | 2.43E-02 | 8.11E+00  | 8.11E+00 |
| ENSG00000075643 | MOCOS         | 1.31 | 1.31  | 0.39  | 2.59E-02 | 8.11E+00  | 8.11E+00 |
| ENSG00000237440 | ZNF737        | 1.24 | 1.24  | 0.32  | 2.36E-02 | 8.10E+00  | 8.10E+00 |
| ENSG00000156876 | SASS6         | 0.80 | -1.25 | -0.32 | 2.37E-02 | -8.09E+00 | 8.09E+00 |
| ENSG00000171222 | SCAND1        | 1.19 | 1.19  | 0.25  | 2.16E-02 | 8.08E+00  | 8.08E+00 |
| ENSG00000142207 | URB1          | 0.82 | -1.23 | -0.29 | 2.30E-02 | -8.08E+00 | 8.08E+00 |
| ENSG00000134452 | FBXO18        | 1.21 | 1.21  | 0.27  | 2.23E-02 | 8.08E+00  | 8.08E+00 |
| ENSG00000165821 | SALL2         | 0.75 | -1.33 | -0.41 | 2.71E-02 | -8.08E+00 | 8.08E+00 |
| ENSG00000129250 | KIF1C         | 0.83 | -1.20 | -0.26 | 2.20E-02 | -8.08E+00 | 8.08E+00 |
|                 | RP3-341D10.4  | 0.74 | -1.36 | -0.44 | 2.83E-02 | -8.07E+00 | 8.07E+00 |
| ENSG00000110400 | PVRL1         | 1.24 | 1.24  | 0.31  | 2.37E-02 | 8.07E+00  | 8.07E+00 |
| ENSG00000170027 | YWHAG         | 1.20 | 1.20  | 0.27  | 2.23E-02 | 8.07E+00  | 8.07E+00 |
| ENSG00000064995 | TAF11         | 0.84 | -1.19 | -0.25 | 2.17E-02 | -8.07E+00 | 8.07E+00 |
| ENSG00000174109 | C16orf91      | 0.82 | -1.22 | -0.29 | 2.29E-02 | -8.07E+00 | 8.07E+00 |
| ENSG00000163788 | SNRK          | 1.20 | 1.20  | 0.27  | 2.22E-02 | 8.06E+00  | 8.06E+00 |
| ENSG00000006576 | PHTF2         | 1.20 | 1.20  | 0.27  | 2.23E-02 | 8.06E+00  | 8.06E+00 |
| ENSG00000175470 | PPP2R2D       | 1.19 | 1.19  | 0.25  | 2.19E-02 | 8.05E+00  | 8.05E+00 |
| ENSG00000259985 | RP11-549B18.1 | 1.36 | 1.36  | 0.44  | 2.85E-02 | 8.04E+00  | 8.04E+00 |
| ENSG00000147853 | AK3           | 0.83 | -1.20 | -0.26 | 2.23E-02 | -8.04E+00 | 8.04E+00 |
| ENSG00000100139 | MICALL1       | 1.20 | 1.20  | 0.27  | 2.25E-02 | 8.03E+00  | 8.03E+00 |
| ENSG00000105778 | AVL9          | 1.19 | 1.19  | 0.26  | 2.21E-02 | 8.03E+00  | 8.03E+00 |
| ENSG00000215548 | RP11-764K9.4  | 0.73 | -1.36 | -0.44 | 2.88E-02 | -8.02E+00 | 8.02E+00 |
| ENSG00000127914 | AKAP9         | 1.25 | 1.25  | 0.32  | 2.43E-02 | 8.02E+00  | 8.02E+00 |
| ENSG00000044574 | HSPA5         | 0.78 | -1.28 | -0.36 | 2.56E-02 | -8.02E+00 | 8.02E+00 |
| ENSG00000180787 | ZFP3          | 0.80 | -1.24 | -0.31 | 2.40E-02 | -8.02E+00 | 8.02E+00 |
| ENSG00000198843 | SELT          | 1.20 | 1.20  | 0.26  | 2.22E-02 | 8.01E+00  | 8.01E+00 |
| ENSG00000103540 | CCP110        | 1.26 | 1.26  | 0.33  | 2.47E-02 | 8.01E+00  | 8.01E+00 |
| ENSG00000130119 | GNL3L         | 0.85 | -1.18 | -0.24 | 2.18E-02 | -8.00E+00 | 8.00E+00 |
| ENSG00000106785 | TRIM14        | 0.81 | -1.23 | -0.30 | 2.36E-02 | -8.00E+00 | 8.00E+00 |
|                 | RP11-122G18.5 | 1.30 | 1.30  | 0.37  | 2.64E-02 | 7.98E+00  | 7.98E+00 |
| ENSG00000196235 | SUPT5H        | 1.20 | 1.20  | 0.27  | 2.27E-02 | 7.98E+00  | 7.98E+00 |
| ENSG00000152795 | HNRPDL        | 0.83 | -1.20 | -0.26 | 2.28E-02 | -7.95E+00 | 7.95E+00 |
| ENSG00000131467 | PSME3         | 0.84 | -1.20 | -0.26 | 2.26E-02 | -7.95E+00 | 7.95E+00 |
| ENSG00000173848 | NET1          | 0.82 | -1.22 | -0.29 | 2.36E-02 | -7.95E+00 | 7.95E+00 |
| ENSG00000110660 | SLC35F2       | 1.20 | 1.20  | 0.26  | 2.27E-02 | 7.95E+00  | 7.95E+00 |
| ENSG00000113966 | ARL6          | 0.79 | -1.26 | -0.33 | 2.51E-02 | -7.95E+00 | 7.95E+00 |
| ENSG00000204519 | ZNF551        | 1.22 | 1.22  | 0.28  | 2.34E-02 | 7.94E+00  | 7.94E+00 |
| ENSG00000188033 | ZNF490        | 1.30 | 1.30  | 0.38  | 2.69E-02 | 7.94E+00  | 7.94E+00 |
| ENSG00000129158 | SERGEF        | 0.79 | -1.27 | -0.35 | 2.58E-02 | -7.93E+00 | 7.93E+00 |
| ENSG00000137504 | CREBZF        | 0.84 | -1.19 | -0.26 | 2.27E-02 | -7.92E+00 | 7.92E+00 |
| ENSG00000109189 | USP46         | 1.19 | 1.19  | 0.25  | 2.25E-02 | 7.92E+00  | 7.92E+00 |
| ENSG00000183963 | SMTN          | 1.24 | 1.24  | 0.31  | 2.45E-02 | 7.92E+00  | 7.92E+00 |
| ENSG00000125652 | ALKBH7        | 0.82 | -1.22 | -0.29 | 2.39E-02 | -7.92E+00 | 7.92E+00 |
| ENSG00000188227 | ZNF793        | 1.34 | 1.34  | 0.42  | 2.85E-02 | 7.91E+00  | 7.91E+00 |
| ENSG00000135049 | AGTPBP1       | 0.84 | -1.19 | -0.25 | 2.26E-02 | -7.91E+00 | 7.91E+00 |
| ENSG00000137764 | MAP2K5        | 1.25 | 1.25  | 0.32  | 2.48E-02 | 7.91E+00  | 7.91E+00 |
| ENSG00000182774 | RPS17         | 0.67 | -1.50 | -0.58 | 3.59E-02 | -7.91E+00 | 7.91E+00 |
| ENSG00000096746 | HNRNPH3       | 1.19 | 1.19  | 0.25  | 2.27E-02 | 7.90E+00  | 7.90E+00 |
| ENSG00000065613 | SLK           | 1.32 | 1.32  | 0.40  | 2.77E-02 | 7.90E+00  | 7.90E+00 |
| ENSG00000155438 | MKI67IP       | 0.84 | -1.19 | -0.25 | 2.27E-02 | -7.89E+00 | 7.89E+00 |
| ENSG00000133561 | GIMAP6        | 0.84 | -1.20 | -0.26 | 2.30E-02 | -7.88E+00 | 7.88E+00 |
| ENSG00000109572 | CLCN3         | 1.20 | 1.20  | 0.26  | 2.32E-02 | 7.87E+00  | 7.87E+00 |
| ENSG00000214274 | ANG           | 0.75 | -1.34 | -0.42 | 2.91E-02 | -7.87E+00 | 7.87E+00 |
| ENSG00000196440 | ARMCX4        | 0.81 | -1.24 | -0.31 | 2.48E-02 | -7.87E+00 | 7.87E+00 |
| ENSG00000223705 | NSUN5P1       | 0.77 | -1.30 | -0.38 | 2.74E-02 | -7.86E+00 | 7.86E+00 |
| ENSG00000100731 | PCNX          | 1.19 | 1.19  | 0.25  | 2.30E-02 | 7.86E+00  | 7.86E+00 |

|                 |               |      |       |       |          |           |          |
|-----------------|---------------|------|-------|-------|----------|-----------|----------|
| ENSG00000166444 | ST5           | 0.77 | -1.29 | -0.37 | 2.72E-02 | -7.85E+00 | 7.85E+00 |
| ENSG00000154229 | PRKCA         | 1.18 | 1.18  | 0.24  | 2.26E-02 | 7.85E+00  | 7.85E+00 |
| ENSG00000138413 | IDH1          | 0.83 | -1.20 | -0.27 | 2.36E-02 | -7.84E+00 | 7.84E+00 |
| ENSG00000260822 | GS1-358P8.4   | 0.79 | -1.26 | -0.34 | 2.60E-02 | -7.84E+00 | 7.84E+00 |
| ENSG00000147121 | ZNF673        | 1.21 | 1.21  | 0.27  | 2.38E-02 | 7.84E+00  | 7.84E+00 |
| ENSG00000139651 | ZNF740        | 0.84 | -1.19 | -0.25 | 2.31E-02 | -7.83E+00 | 7.83E+00 |
| ENSG00000145990 | GFOD1         | 0.84 | -1.20 | -0.26 | 2.34E-02 | -7.82E+00 | 7.82E+00 |
| ENSG00000091483 | FH            | 0.84 | -1.20 | -0.26 | 2.34E-02 | -7.81E+00 | 7.81E+00 |
| ENSG00000133961 | NUMB          | 1.23 | 1.23  | 0.30  | 2.48E-02 | 7.81E+00  | 7.81E+00 |
| ENSG00000097007 | ABL1          | 1.24 | 1.24  | 0.32  | 2.55E-02 | 7.80E+00  | 7.80E+00 |
| ENSG00000205309 | NT5M          | 1.38 | 1.38  | 0.46  | 3.13E-02 | 7.80E+00  | 7.80E+00 |
| ENSG00000134138 | MEIS2         | 1.19 | 1.19  | 0.25  | 2.34E-02 | 7.79E+00  | 7.79E+00 |
| ENSG00000156110 | ADK           | 0.84 | -1.19 | -0.26 | 2.35E-02 | -7.79E+00 | 7.79E+00 |
| ENSG00000185129 | PURA          | 1.21 | 1.21  | 0.28  | 2.43E-02 | 7.78E+00  | 7.78E+00 |
| ENSG00000196369 | SRGAP2B       | 1.20 | 1.20  | 0.26  | 2.37E-02 | 7.78E+00  | 7.78E+00 |
|                 | AC092295.7    | 1.31 | 1.31  | 0.39  | 2.82E-02 | 7.78E+00  | 7.78E+00 |
| ENSG00000125352 | RNF113A       | 1.20 | 1.20  | 0.26  | 2.38E-02 | 7.78E+00  | 7.78E+00 |
| ENSG00000077254 | USP33         | 1.20 | 1.20  | 0.26  | 2.38E-02 | 7.77E+00  | 7.77E+00 |
| ENSG00000174886 | NDUFA11       | 0.83 | -1.21 | -0.28 | 2.43E-02 | -7.77E+00 | 7.77E+00 |
| ENSG00000166526 | ZNF3          | 1.18 | 1.18  | 0.24  | 2.32E-02 | 7.76E+00  | 7.76E+00 |
| ENSG00000100532 | CGRRF1        | 1.20 | 1.20  | 0.26  | 2.38E-02 | 7.76E+00  | 7.76E+00 |
| ENSG00000124279 | FASTKD3       | 0.83 | -1.20 | -0.27 | 2.40E-02 | -7.76E+00 | 7.76E+00 |
| ENSG00000185238 | PRMT3         | 0.85 | -1.18 | -0.24 | 2.32E-02 | -7.75E+00 | 7.75E+00 |
| ENSG00000173597 | SULT1B1       | 0.80 | -1.24 | -0.32 | 2.58E-02 | -7.75E+00 | 7.75E+00 |
| ENSG00000134453 | RBM17         | 0.84 | -1.19 | -0.25 | 2.37E-02 | -7.74E+00 | 7.74E+00 |
| ENSG00000184402 | SS18L1        | 1.22 | 1.22  | 0.28  | 2.47E-02 | 7.74E+00  | 7.74E+00 |
| ENSG00000175899 | A2M           | 0.70 | -1.42 | -0.51 | 3.37E-02 | -7.73E+00 | 7.73E+00 |
| ENSG00000178467 | P4HTM         | 1.21 | 1.21  | 0.27  | 2.44E-02 | 7.73E+00  | 7.73E+00 |
| ENSG00000134569 | LRP4          | 0.73 | -1.38 | -0.46 | 3.18E-02 | -7.71E+00 | 7.71E+00 |
| ENSG00000188807 | TMEM201       | 0.81 | -1.23 | -0.30 | 2.54E-02 | -7.70E+00 | 7.70E+00 |
| ENSG00000119772 | DNMT3A        | 0.84 | -1.18 | -0.24 | 2.37E-02 | -7.69E+00 | 7.69E+00 |
| ENSG00000123353 | ORMDL2        | 0.84 | -1.18 | -0.24 | 2.37E-02 | -7.69E+00 | 7.69E+00 |
| ENSG00000001631 | KRIT1         | 1.20 | 1.20  | 0.27  | 2.46E-02 | 7.67E+00  | 7.67E+00 |
| ENSG00000184428 | TOP1MT        | 0.83 | -1.21 | -0.27 | 2.48E-02 | -7.67E+00 | 7.67E+00 |
| ENSG00000127948 | POR           | 1.30 | 1.30  | 0.38  | 2.88E-02 | 7.65E+00  | 7.65E+00 |
| ENSG00000128694 | OSGEPL1       | 0.83 | -1.21 | -0.27 | 2.49E-02 | -7.65E+00 | 7.65E+00 |
| ENSG00000047315 | POLR2B        | 1.20 | 1.20  | 0.26  | 2.44E-02 | 7.65E+00  | 7.65E+00 |
| ENSG00000140740 | UQCRC2        | 0.84 | -1.19 | -0.26 | 2.44E-02 | -7.64E+00 | 7.64E+00 |
| ENSG00000138606 | SHF           | 0.76 | -1.32 | -0.40 | 2.99E-02 | -7.64E+00 | 7.64E+00 |
|                 | AC004463.6    | 0.74 | -1.35 | -0.43 | 3.12E-02 | -7.64E+00 | 7.64E+00 |
| ENSG00000184863 | RBM33         | 1.19 | 1.19  | 0.25  | 2.41E-02 | 7.64E+00  | 7.64E+00 |
| ENSG00000132275 | RRP8          | 0.85 | -1.18 | -0.24 | 2.40E-02 | -7.63E+00 | 7.63E+00 |
| ENSG00000173218 | VANGL1        | 1.19 | 1.19  | 0.25  | 2.43E-02 | 7.63E+00  | 7.63E+00 |
| ENSG00000065665 | SEC61A2       | 1.25 | 1.25  | 0.33  | 2.71E-02 | 7.62E+00  | 7.62E+00 |
| ENSG00000106638 | TBL2          | 1.18 | 1.18  | 0.24  | 2.42E-02 | 7.62E+00  | 7.62E+00 |
| ENSG00000198189 | HSD17B11      | 0.85 | -1.18 | -0.24 | 2.40E-02 | -7.61E+00 | 7.61E+00 |
| ENSG00000108854 | SMURF2        | 1.20 | 1.20  | 0.26  | 2.47E-02 | 7.61E+00  | 7.61E+00 |
| ENSG00000114626 | ABTB1         | 0.74 | -1.36 | -0.44 | 3.18E-02 | -7.61E+00 | 7.61E+00 |
| ENSG00000172292 | CERS6         | 0.84 | -1.20 | -0.26 | 2.48E-02 | -7.59E+00 | 7.59E+00 |
| ENSG00000188732 | FAM221A       | 0.79 | -1.26 | -0.33 | 2.75E-02 | -7.59E+00 | 7.59E+00 |
| ENSG00000149212 | SESN3         | 0.81 | -1.24 | -0.31 | 2.66E-02 | -7.59E+00 | 7.59E+00 |
| ENSG00000204713 | TRIM27        | 1.19 | 1.19  | 0.25  | 2.47E-02 | 7.59E+00  | 7.59E+00 |
| ENSG00000114942 | EEF1B2        | 0.83 | -1.21 | -0.27 | 2.54E-02 | -7.58E+00 | 7.58E+00 |
| ENSG00000042317 | SPATA7        | 1.22 | 1.22  | 0.29  | 2.61E-02 | 7.58E+00  | 7.58E+00 |
| ENSG00000172456 | FGGY          | 1.26 | 1.26  | 0.33  | 2.77E-02 | 7.55E+00  | 7.55E+00 |
| ENSG00000188215 | DCUN1D3       | 1.19 | 1.19  | 0.25  | 2.48E-02 | 7.55E+00  | 7.55E+00 |
| ENSG00000099968 | BCL2L13       | 1.19 | 1.19  | 0.25  | 2.48E-02 | 7.55E+00  | 7.55E+00 |
| ENSG00000266962 | RP11-400F19.6 | 0.83 | -1.20 | -0.27 | 2.54E-02 | -7.54E+00 | 7.54E+00 |
| ENSG00000182809 | CRIP2         | 1.19 | 1.19  | 0.25  | 2.50E-02 | 7.54E+00  | 7.54E+00 |
| ENSG00000119574 | ZBTB45        | 1.28 | 1.28  | 0.35  | 2.87E-02 | 7.53E+00  | 7.53E+00 |
| ENSG00000065559 | MAP2K4        | 1.18 | 1.18  | 0.24  | 2.47E-02 | 7.52E+00  | 7.52E+00 |
| ENSG00000072110 | ACTN1         | 1.28 | 1.28  | 0.35  | 2.89E-02 | 7.51E+00  | 7.51E+00 |
| ENSG00000165948 | IFI27L1       | 0.83 | -1.21 | -0.27 | 2.59E-02 | -7.51E+00 | 7.51E+00 |
| ENSG00000115380 | EFEMP1        | 0.83 | -1.20 | -0.26 | 2.56E-02 | -7.51E+00 | 7.51E+00 |
| ENSG00000168610 | STAT3         | 1.20 | 1.20  | 0.26  | 2.54E-02 | 7.51E+00  | 7.51E+00 |
| ENSG00000171160 | MORN4         | 0.80 | -1.26 | -0.33 | 2.80E-02 | -7.50E+00 | 7.50E+00 |
| ENSG00000184635 | ZNF93         | 0.81 | -1.23 | -0.30 | 2.72E-02 | -7.49E+00 | 7.49E+00 |
| ENSG00000131871 | VIMP          | 0.83 | -1.20 | -0.27 | 2.58E-02 | -7.49E+00 | 7.49E+00 |
| ENSG00000121211 | MND1          | 0.81 | -1.24 | -0.31 | 2.74E-02 | -7.48E+00 | 7.48E+00 |
| ENSG00000132122 | SPATA6        | 0.78 | -1.28 | -0.35 | 2.92E-02 | -7.48E+00 | 7.48E+00 |
| ENSG00000128609 | NDUFA5        | 0.83 | -1.20 | -0.26 | 2.58E-02 | -7.48E+00 | 7.48E+00 |
| ENSG00000181061 | HIGD1A        | 1.20 | 1.20  | 0.26  | 2.57E-02 | 7.47E+00  | 7.47E+00 |
| ENSG00000155906 | RMND1         | 0.84 | -1.19 | -0.25 | 2.55E-02 | -7.47E+00 | 7.47E+00 |
| ENSG00000068137 | PLEKHH3       | 1.25 | 1.25  | 0.32  | 2.81E-02 | 7.46E+00  | 7.46E+00 |
| ENSG00000100083 | GGA1          | 1.18 | 1.18  | 0.24  | 2.51E-02 | 7.45E+00  | 7.45E+00 |
| ENSG00000183060 | LYSMD4        | 0.79 | -1.26 | -0.33 | 2.87E-02 | -7.45E+00 | 7.45E+00 |
| ENSG00000196683 | TOMM7         | 0.82 | -1.23 | -0.29 | 2.71E-02 | -7.44E+00 | 7.44E+00 |
| ENSG00000091986 | CCDC80        | 1.21 | 1.21  | 0.28  | 2.66E-02 | 7.43E+00  | 7.43E+00 |
| ENSG00000132128 | LRRC41        | 0.84 | -1.20 | -0.26 | 2.59E-02 | -7.43E+00 | 7.43E+00 |

|                 |                 |      |       |       |          |           |          |
|-----------------|-----------------|------|-------|-------|----------|-----------|----------|
| ENSG00000197283 | SYNGAP1         | 1.32 | 1.32  | 0.40  | 3.15E-02 | 7.42E+00  | 7.42E+00 |
| ENSG00000205581 | HMGNI           | 0.84 | -1.20 | -0.26 | 2.60E-02 | -7.42E+00 | 7.42E+00 |
| ENSG00000114331 | ACAP2           | 1.23 | 1.23  | 0.29  | 2.73E-02 | 7.41E+00  | 7.41E+00 |
| ENSG00000151445 | VIPAS39         | 0.85 | -1.18 | -0.24 | 2.53E-02 | -7.41E+00 | 7.41E+00 |
| ENSG00000137807 | KIF23           | 0.81 | -1.23 | -0.30 | 2.74E-02 | -7.41E+00 | 7.41E+00 |
| ENSG00000176903 | PNMA1           | 0.84 | -1.19 | -0.25 | 2.58E-02 | -7.41E+00 | 7.41E+00 |
| ENSG00000185730 | ZNF696          | 0.80 | -1.25 | -0.32 | 2.83E-02 | -7.41E+00 | 7.41E+00 |
| ENSG00000157259 | GATAD1          | 1.18 | 1.18  | 0.24  | 2.53E-02 | 7.40E+00  | 7.40E+00 |
| ENSG00000198265 | HELZ            | 1.19 | 1.19  | 0.25  | 2.59E-02 | 7.39E+00  | 7.39E+00 |
| ENSG00000175581 | MRPL48          | 0.85 | -1.18 | -0.23 | 2.53E-02 | -7.39E+00 | 7.39E+00 |
| ENSG00000143450 | OAZ3            | 1.36 | 1.36  | 0.45  | 3.41E-02 | 7.39E+00  | 7.39E+00 |
| ENSG00000187764 | SEMA4D          | 1.31 | 1.31  | 0.39  | 3.15E-02 | 7.38E+00  | 7.38E+00 |
| ENSG00000170471 | RALGAPB         | 1.19 | 1.19  | 0.26  | 2.62E-02 | 7.38E+00  | 7.38E+00 |
| ENSG00000267321 | RP11-1094M14.11 | 0.81 | -1.23 | -0.30 | 2.80E-02 | -7.38E+00 | 7.38E+00 |
| ENSG00000185650 | ZFP36L1         | 1.19 | 1.19  | 0.26  | 2.62E-02 | 7.37E+00  | 7.37E+00 |
| ENSG00000204576 | PRR3            | 0.83 | -1.21 | -0.27 | 2.68E-02 | -7.37E+00 | 7.37E+00 |
| ENSG00000196396 | PTPN1           | 1.20 | 1.20  | 0.27  | 2.67E-02 | 7.37E+00  | 7.37E+00 |
| ENSG00000169118 | CSNK1G1         | 1.18 | 1.18  | 0.24  | 2.59E-02 | 7.36E+00  | 7.36E+00 |
| ENSG00000159377 | PSMB4           | 0.84 | -1.20 | -0.26 | 2.66E-02 | -7.34E+00 | 7.34E+00 |
| ENSG00000186615 | KTN1-AS1        | 0.75 | -1.34 | -0.42 | 3.35E-02 | -7.34E+00 | 7.34E+00 |
| ENSG00000268895 | A1BG-AS1        | 0.78 | -1.29 | -0.37 | 3.09E-02 | -7.34E+00 | 7.34E+00 |
| ENSG00000163820 | FYCO1           | 1.21 | 1.21  | 0.28  | 2.74E-02 | 7.33E+00  | 7.33E+00 |
|                 | RP11-357N13.7   | 1.35 | 1.35  | 0.44  | 3.41E-02 | 7.33E+00  | 7.33E+00 |
| ENSG00000130396 | MLLT4           | 1.19 | 1.19  | 0.25  | 2.64E-02 | 7.32E+00  | 7.32E+00 |
| ENSG00000104960 | PTOV1           | 1.19 | 1.19  | 0.25  | 2.62E-02 | 7.32E+00  | 7.32E+00 |
| ENSG00000180902 | D2HGDH          | 1.22 | 1.22  | 0.29  | 2.81E-02 | 7.31E+00  | 7.31E+00 |
| ENSG00000138107 | ACTR1A          | 0.84 | -1.19 | -0.25 | 2.66E-02 | -7.31E+00 | 7.31E+00 |
| ENSG00000244405 | ETV5            | 1.21 | 1.21  | 0.28  | 2.78E-02 | 7.28E+00  | 7.28E+00 |
| ENSG00000154370 | TRIM11          | 1.20 | 1.20  | 0.26  | 2.70E-02 | 7.28E+00  | 7.28E+00 |
|                 | RP11-622K12.1   | 0.85 | -1.18 | -0.24 | 2.63E-02 | -7.28E+00 | 7.28E+00 |
| ENSG00000178343 | SHISA3          | 0.82 | -1.22 | -0.28 | 2.80E-02 | -7.27E+00 | 7.27E+00 |
| ENSG00000133619 | KRBA1           | 1.23 | 1.23  | 0.30  | 2.86E-02 | 7.27E+00  | 7.27E+00 |
| ENSG00000141030 | COPS3           | 0.84 | -1.19 | -0.25 | 2.67E-02 | -7.26E+00 | 7.26E+00 |
| ENSG00000256185 | RP11-612B6.2    | 1.35 | 1.35  | 0.43  | 3.47E-02 | 7.25E+00  | 7.25E+00 |
| ENSG00000129675 | ARHGEF6         | 0.83 | -1.20 | -0.26 | 2.74E-02 | -7.25E+00 | 7.25E+00 |
| ENSG00000143761 | ARF1            | 1.20 | 1.20  | 0.26  | 2.72E-02 | 7.25E+00  | 7.25E+00 |
| ENSG00000115902 | SLC1A4          | 0.82 | -1.22 | -0.29 | 2.83E-02 | -7.24E+00 | 7.24E+00 |
| ENSG00000092203 | TOX4            | 1.18 | 1.18  | 0.24  | 2.67E-02 | 7.24E+00  | 7.24E+00 |
| ENSG00000178078 | STAP2           | 0.80 | -1.25 | -0.32 | 2.98E-02 | -7.24E+00 | 7.24E+00 |
| ENSG00000134262 | AP4B1           | 0.85 | -1.18 | -0.24 | 2.65E-02 | -7.23E+00 | 7.23E+00 |
| ENSG00000161547 | SRSF2           | 0.84 | -1.19 | -0.25 | 2.72E-02 | -7.23E+00 | 7.23E+00 |
| ENSG00000076662 | ICAM3           | 1.25 | 1.25  | 0.32  | 2.97E-02 | 7.23E+00  | 7.23E+00 |
| ENSG00000130348 | QRSL1           | 0.85 | -1.18 | -0.23 | 2.65E-02 | -7.22E+00 | 7.22E+00 |
| ENSG00000170854 | MINA            | 0.85 | -1.18 | -0.24 | 2.67E-02 | -7.22E+00 | 7.22E+00 |
| ENSG00000072274 | TFRC            | 0.84 | -1.19 | -0.25 | 2.72E-02 | -7.22E+00 | 7.22E+00 |
| ENSG00000175592 | FOSL1           | 1.26 | 1.26  | 0.34  | 3.07E-02 | 7.22E+00  | 7.22E+00 |
| ENSG00000078304 | PPP2R5C         | 1.19 | 1.19  | 0.25  | 2.72E-02 | 7.22E+00  | 7.22E+00 |
| ENSG00000158792 | SPATA2L         | 0.79 | -1.27 | -0.35 | 3.11E-02 | -7.21E+00 | 7.21E+00 |
| ENSG00000128408 | RIBC2           | 1.33 | 1.33  | 0.41  | 3.40E-02 | 7.21E+00  | 7.21E+00 |
| ENSG00000119523 | ALG2            | 1.18 | 1.18  | 0.24  | 2.69E-02 | 7.21E+00  | 7.21E+00 |
| ENSG00000204790 | CBWD6           | 0.76 | -1.31 | -0.39 | 3.33E-02 | -7.20E+00 | 7.20E+00 |
| ENSG00000166922 | SCG5            | 0.71 | -1.41 | -0.49 | 3.81E-02 | -7.20E+00 | 7.20E+00 |
| ENSG00000133612 | AGAP3           | 1.18 | 1.18  | 0.24  | 2.68E-02 | 7.19E+00  | 7.19E+00 |
| ENSG00000131196 | NFATC1          | 1.22 | 1.22  | 0.28  | 2.86E-02 | 7.19E+00  | 7.19E+00 |
| ENSG00000111321 | LTBR            | 0.81 | -1.23 | -0.30 | 2.94E-02 | -7.19E+00 | 7.19E+00 |
| ENSG00000256683 | ZNF350          | 1.24 | 1.24  | 0.31  | 2.98E-02 | 7.18E+00  | 7.18E+00 |
| ENSG00000111652 | COPS7A          | 0.85 | -1.18 | -0.24 | 2.71E-02 | -7.18E+00 | 7.18E+00 |
| ENSG00000183723 | CMTM4           | 0.83 | -1.21 | -0.27 | 2.84E-02 | -7.17E+00 | 7.17E+00 |
| ENSG00000266074 | BAHCC1          | 1.26 | 1.26  | 0.33  | 3.10E-02 | 7.16E+00  | 7.16E+00 |
| ENSG00000176340 | COX8A           | 0.84 | -1.20 | -0.26 | 2.80E-02 | -7.15E+00 | 7.15E+00 |
| ENSG00000100836 | PABPN1          | 0.84 | -1.19 | -0.26 | 2.79E-02 | -7.15E+00 | 7.15E+00 |
| ENSG00000167461 | RAB8A           | 0.84 | -1.18 | -0.24 | 2.74E-02 | -7.15E+00 | 7.15E+00 |
| ENSG00000144560 | VGLL4           | 1.21 | 1.21  | 0.27  | 2.85E-02 | 7.15E+00  | 7.15E+00 |
| ENSG00000186479 | RGS7BP          | 0.79 | -1.26 | -0.34 | 3.12E-02 | -7.15E+00 | 7.15E+00 |
| ENSG00000207445 | SNORD15B        | 0.73 | -1.37 | -0.45 | 3.66E-02 | -7.14E+00 | 7.14E+00 |
| ENSG00000144451 | SPAG16          | 0.83 | -1.21 | -0.27 | 2.85E-02 | -7.14E+00 | 7.14E+00 |
| ENSG00000134982 | APC             | 1.38 | 1.38  | 0.46  | 3.73E-02 | 7.12E+00  | 7.12E+00 |
| ENSG00000109738 | GLRB            | 0.81 | -1.24 | -0.31 | 3.04E-02 | -7.11E+00 | 7.11E+00 |
| ENSG00000112304 | ACOT13          | 0.85 | -1.18 | -0.24 | 2.75E-02 | -7.11E+00 | 7.11E+00 |
| ENSG00000167526 | RPL13           | 0.84 | -1.20 | -0.26 | 2.84E-02 | -7.10E+00 | 7.10E+00 |
| ENSG00000167562 | ZNF701          | 1.21 | 1.21  | 0.28  | 2.92E-02 | 7.09E+00  | 7.09E+00 |
| ENSG00000220370 | RP3-399J4.2     | 0.73 | -1.37 | -0.45 | 3.74E-02 | -7.09E+00 | 7.09E+00 |
| ENSG00000176401 | EID2B           | 0.78 | -1.28 | -0.35 | 3.25E-02 | -7.08E+00 | 7.08E+00 |
| ENSG00000130684 | ZNF337          | 1.17 | 1.17  | 0.23  | 2.75E-02 | 7.08E+00  | 7.08E+00 |
| ENSG00000042429 | MED17           | 1.19 | 1.19  | 0.25  | 2.80E-02 | 7.08E+00  | 7.08E+00 |
| ENSG00000166912 | MTMR10          | 0.84 | -1.19 | -0.25 | 2.81E-02 | -7.08E+00 | 7.08E+00 |
| ENSG00000269955 | LUC7L2          | 0.85 | -1.18 | -0.24 | 2.79E-02 | -7.07E+00 | 7.07E+00 |
|                 | RP11-1136G11.7  | 0.73 | -1.36 | -0.45 | 3.71E-02 | -7.07E+00 | 7.07E+00 |
| ENSG00000142784 | WDC1            | 1.20 | 1.20  | 0.26  | 2.88E-02 | 7.06E+00  | 7.06E+00 |

|                 |               |      |       |       |          |           |          |
|-----------------|---------------|------|-------|-------|----------|-----------|----------|
| ENSG00000070961 | ATP2B1        | 0.82 | -1.23 | -0.30 | 3.02E-02 | -7.06E+00 | 7.06E+00 |
| ENSG00000083168 | KAT6A         | 1.18 | 1.18  | 0.24  | 2.81E-02 | 7.06E+00  | 7.06E+00 |
| ENSG00000166619 | BLCAP         | 0.85 | -1.18 | -0.24 | 2.80E-02 | -7.05E+00 | 7.05E+00 |
| ENSG00000139734 | DIAPH3        | 0.84 | -1.19 | -0.25 | 2.86E-02 | -7.04E+00 | 7.04E+00 |
| ENSG00000101052 | IFT52         | 0.84 | -1.19 | -0.25 | 2.84E-02 | -7.04E+00 | 7.04E+00 |
| ENSG00000144224 | UBXN4         | 1.25 | 1.25  | 0.32  | 3.14E-02 | 7.03E+00  | 7.03E+00 |
| ENSG00000145592 | RPL37         | 0.82 | -1.22 | -0.29 | 3.04E-02 | -7.02E+00 | 7.02E+00 |
| ENSG00000147649 | MTDH          | 1.19 | 1.19  | 0.25  | 2.87E-02 | 7.02E+00  | 7.02E+00 |
| ENSG00000009413 | REV3L         | 1.38 | 1.38  | 0.46  | 3.86E-02 | 7.01E+00  | 7.01E+00 |
| ENSG00000180806 | HOXC9         | 1.38 | 1.38  | 0.47  | 3.89E-02 | 7.00E+00  | 7.00E+00 |
| ENSG00000107249 | GLIS3         | 1.33 | 1.33  | 0.42  | 3.64E-02 | 6.99E+00  | 6.99E+00 |
| ENSG00000196937 | FAM3C         | 1.18 | 1.18  | 0.24  | 2.86E-02 | 6.99E+00  | 6.99E+00 |
| ENSG00000142173 | COL6A2        | 1.35 | 1.35  | 0.43  | 3.71E-02 | 6.98E+00  | 6.98E+00 |
| ENSG00000268205 | CTC-444N24.11 | 1.23 | 1.23  | 0.30  | 3.12E-02 | 6.98E+00  | 6.98E+00 |
| ENSG00000137492 | PRKRIR        | 0.85 | -1.18 | -0.24 | 2.87E-02 | -6.97E+00 | 6.97E+00 |
| ENSG00000136492 | BRIP1         | 0.80 | -1.25 | -0.33 | 3.24E-02 | -6.96E+00 | 6.96E+00 |
| ENSG00000171522 | PTGER4        | 1.20 | 1.20  | 0.26  | 2.96E-02 | 6.96E+00  | 6.96E+00 |
| ENSG00000115042 | FAHD2A        | 0.84 | -1.19 | -0.25 | 2.91E-02 | -6.96E+00 | 6.96E+00 |
| ENSG00000186298 | PPP1CC        | 0.82 | -1.21 | -0.28 | 3.04E-02 | -6.96E+00 | 6.96E+00 |
| ENSG00000168040 | FADD          | 1.18 | 1.18  | 0.24  | 2.90E-02 | 6.96E+00  | 6.96E+00 |
| ENSG00000109111 | SUPT6H        | 1.19 | 1.19  | 0.25  | 2.91E-02 | 6.96E+00  | 6.96E+00 |
| ENSG00000119977 | TCTN3         | 1.18 | 1.18  | 0.24  | 2.89E-02 | 6.96E+00  | 6.96E+00 |
| ENSG00000051382 | PIK3CB        | 1.18 | 1.18  | 0.24  | 2.87E-02 | 6.95E+00  | 6.95E+00 |
| ENSG00000135362 | PRR5L         | 1.22 | 1.22  | 0.28  | 3.06E-02 | 6.95E+00  | 6.95E+00 |
| ENSG00000205485 | AC004980.7    | 0.75 | -1.34 | -0.42 | 3.71E-02 | -6.94E+00 | 6.94E+00 |
| ENSG00000105325 | FZR1          | 1.20 | 1.20  | 0.27  | 3.01E-02 | 6.94E+00  | 6.94E+00 |
| ENSG00000149269 | PAK1          | 0.83 | -1.20 | -0.26 | 2.98E-02 | -6.94E+00 | 6.94E+00 |
| ENSG00000213020 | ZNF611        | 1.21 | 1.21  | 0.27  | 3.02E-02 | 6.94E+00  | 6.94E+00 |
| ENSG00000119878 | CRIP1         | 0.82 | -1.22 | -0.28 | 3.08E-02 | -6.94E+00 | 6.94E+00 |
| ENSG00000151239 | TWTF1         | 1.22 | 1.22  | 0.28  | 3.08E-02 | 6.93E+00  | 6.93E+00 |
| ENSG00000136160 | EDNRB         | 0.81 | -1.23 | -0.30 | 3.15E-02 | -6.93E+00 | 6.93E+00 |
| ENSG00000129295 | LRRC6         | 1.24 | 1.24  | 0.31  | 3.18E-02 | 6.93E+00  | 6.93E+00 |
| ENSG00000160285 | LSS           | 0.83 | -1.20 | -0.26 | 3.00E-02 | -6.92E+00 | 6.92E+00 |
| ENSG00000109971 | HSPA8         | 0.84 | -1.19 | -0.25 | 2.97E-02 | -6.92E+00 | 6.92E+00 |
| ENSG00000158169 | FANCC         | 0.82 | -1.21 | -0.28 | 3.07E-02 | -6.92E+00 | 6.92E+00 |
| ENSG00000198752 | CDC42BPB      | 1.21 | 1.21  | 0.27  | 3.06E-02 | 6.92E+00  | 6.92E+00 |
| ENSG00000180694 | TMEM64        | 1.19 | 1.19  | 0.25  | 2.96E-02 | 6.91E+00  | 6.91E+00 |
| ENSG00000025800 | KPNA6         | 0.84 | -1.19 | -0.26 | 2.99E-02 | -6.91E+00 | 6.91E+00 |
| ENSG00000142227 | EMP3          | 0.84 | -1.19 | -0.25 | 2.97E-02 | -6.91E+00 | 6.91E+00 |
| ENSG00000110330 | BIRC2         | 1.20 | 1.20  | 0.26  | 3.01E-02 | 6.90E+00  | 6.90E+00 |
| ENSG00000166130 | IKBIP         | 1.19 | 1.19  | 0.25  | 2.97E-02 | 6.89E+00  | 6.89E+00 |
| ENSG00000163399 | ATP1A1        | 1.30 | 1.30  | 0.38  | 3.58E-02 | 6.89E+00  | 6.89E+00 |
| ENSG00000196642 | RABL6         | 0.84 | -1.18 | -0.24 | 2.95E-02 | -6.89E+00 | 6.89E+00 |
| ENSG00000184857 | TMEM186       | 0.80 | -1.24 | -0.32 | 3.26E-02 | -6.89E+00 | 6.89E+00 |
| ENSG00000145022 | TCTA          | 0.83 | -1.20 | -0.27 | 3.06E-02 | -6.88E+00 | 6.88E+00 |
|                 | AC103965.1    | 0.83 | -1.21 | -0.27 | 3.09E-02 | -6.88E+00 | 6.88E+00 |
| ENSG00000105520 | LPPR2         | 1.29 | 1.29  | 0.37  | 3.54E-02 | 6.87E+00  | 6.87E+00 |
| ENSG00000144048 | DUSP11        | 0.85 | -1.18 | -0.24 | 2.95E-02 | -6.87E+00 | 6.87E+00 |
| ENSG00000090905 | TNRC6A        | 0.85 | -1.18 | -0.24 | 2.96E-02 | -6.87E+00 | 6.87E+00 |
| ENSG00000170955 | PRKCDBP       | 1.19 | 1.19  | 0.25  | 3.02E-02 | 6.87E+00  | 6.87E+00 |
| ENSG00000137075 | RNF38         | 1.18 | 1.18  | 0.24  | 2.94E-02 | 6.87E+00  | 6.87E+00 |
| ENSG00000172590 | MRPL52        | 0.82 | -1.21 | -0.28 | 3.12E-02 | -6.86E+00 | 6.86E+00 |
| ENSG00000086619 | ERO1LB        | 1.24 | 1.24  | 0.31  | 3.27E-02 | 6.86E+00  | 6.86E+00 |
| ENSG00000125967 | NECAB3        | 0.80 | -1.25 | -0.33 | 3.35E-02 | -6.85E+00 | 6.85E+00 |
| ENSG00000139168 | ZCRB1         | 1.18 | 1.18  | 0.24  | 2.99E-02 | 6.84E+00  | 6.84E+00 |
| ENSG00000124198 | ARFGEF2       | 1.19 | 1.19  | 0.25  | 3.03E-02 | 6.84E+00  | 6.84E+00 |
|                 | CTA-211A9.5   | 0.73 | -1.37 | -0.45 | 4.01E-02 | -6.84E+00 | 6.84E+00 |
| ENSG00000102010 | BMX           | 1.20 | 1.20  | 0.26  | 3.09E-02 | 6.83E+00  | 6.83E+00 |
| ENSG00000107077 | KDM4C         | 1.18 | 1.18  | 0.24  | 2.98E-02 | 6.83E+00  | 6.83E+00 |
| ENSG00000100316 | RPL3          | 0.81 | -1.24 | -0.31 | 3.30E-02 | -6.83E+00 | 6.83E+00 |
| ENSG00000188242 | CTD-2228K2.5  | 0.82 | -1.23 | -0.29 | 3.23E-02 | -6.82E+00 | 6.82E+00 |
| ENSG00000099282 | TSPAN15       | 0.85 | -1.17 | -0.23 | 2.96E-02 | -6.82E+00 | 6.82E+00 |
| ENSG00000160223 | ICOSLG        | 1.30 | 1.30  | 0.38  | 3.63E-02 | 6.81E+00  | 6.81E+00 |
| ENSG00000111640 | GAPDH         | 0.83 | -1.20 | -0.27 | 3.12E-02 | -6.81E+00 | 6.81E+00 |
| ENSG00000164024 | METAP1        | 0.85 | -1.18 | -0.24 | 3.02E-02 | -6.81E+00 | 6.81E+00 |
| ENSG00000082438 | COBLL1        | 1.21 | 1.21  | 0.28  | 3.16E-02 | 6.81E+00  | 6.81E+00 |
| ENSG00000047849 | MAP4          | 1.23 | 1.23  | 0.30  | 3.25E-02 | 6.81E+00  | 6.81E+00 |
| ENSG00000114473 | IQCG          | 1.26 | 1.26  | 0.34  | 3.45E-02 | 6.80E+00  | 6.80E+00 |
| ENSG00000138768 | USO1          | 1.25 | 1.25  | 0.32  | 3.40E-02 | 6.79E+00  | 6.79E+00 |
| ENSG00000130830 | MPP1          | 1.17 | 1.17  | 0.23  | 2.98E-02 | 6.79E+00  | 6.79E+00 |
| ENSG00000205078 | SYCE1L        | 0.75 | -1.33 | -0.41 | 3.82E-02 | -6.79E+00 | 6.79E+00 |
| ENSG00000164338 | UTP15         | 0.85 | -1.17 | -0.23 | 3.00E-02 | -6.78E+00 | 6.78E+00 |
| ENSG00000119421 | NDUFA8        | 1.19 | 1.19  | 0.25  | 3.08E-02 | 6.78E+00  | 6.78E+00 |
| ENSG00000166123 | GPT2          | 1.18 | 1.18  | 0.24  | 3.05E-02 | 6.76E+00  | 6.76E+00 |
| ENSG00000130414 | NDUFA10       | 0.85 | -1.18 | -0.24 | 3.06E-02 | -6.75E+00 | 6.75E+00 |
| ENSG00000125247 | TMTC4         | 1.17 | 1.17  | 0.23  | 3.03E-02 | 6.75E+00  | 6.75E+00 |
| ENSG00000062485 | CS            | 0.84 | -1.20 | -0.26 | 3.14E-02 | -6.74E+00 | 6.74E+00 |
| ENSG00000198911 | SREBF2        | 0.85 | -1.18 | -0.23 | 3.04E-02 | -6.74E+00 | 6.74E+00 |
|                 | AL132709.5    | 1.18 | 1.18  | 0.24  | 3.08E-02 | 6.74E+00  | 6.74E+00 |

|                 |               |      |       |       |          |           |          |
|-----------------|---------------|------|-------|-------|----------|-----------|----------|
| ENSG00000184384 | MAML2         | 1.20 | 1.20  | 0.27  | 3.20E-02 | 6.74E+00  | 6.74E+00 |
| ENSG00000154556 | SORBS2        | 0.83 | -1.20 | -0.27 | 3.20E-02 | -6.74E+00 | 6.74E+00 |
| ENSG00000173226 | IQCB1         | 0.85 | -1.18 | -0.23 | 3.06E-02 | -6.72E+00 | 6.72E+00 |
| ENSG00000228989 | AC133528.2    | 0.75 | -1.33 | -0.41 | 3.94E-02 | -6.71E+00 | 6.71E+00 |
| ENSG00000242588 | RP11-274B21.1 | 1.28 | 1.28  | 0.36  | 3.65E-02 | 6.71E+00  | 6.71E+00 |
| ENSG00000164035 | EMCN          | 0.80 | -1.25 | -0.32 | 3.47E-02 | -6.71E+00 | 6.71E+00 |
| ENSG00000159079 | C21orf59      | 0.77 | -1.30 | -0.38 | 3.78E-02 | -6.71E+00 | 6.71E+00 |
| ENSG00000168505 | GBX2          | 1.34 | 1.34  | 0.43  | 4.02E-02 | 6.71E+00  | 6.71E+00 |
| ENSG00000119684 | MLH3          | 1.20 | 1.20  | 0.26  | 3.20E-02 | 6.70E+00  | 6.70E+00 |
| ENSG00000167657 | DAPK3         | 1.19 | 1.19  | 0.25  | 3.17E-02 | 6.69E+00  | 6.69E+00 |
|                 | RP11-732M18.3 | 1.29 | 1.29  | 0.37  | 3.72E-02 | 6.69E+00  | 6.69E+00 |
| ENSG00000196204 | RNF216P1      | 0.84 | -1.19 | -0.25 | 3.17E-02 | -6.68E+00 | 6.68E+00 |
| ENSG00000137486 | ARRB1         | 1.21 | 1.21  | 0.27  | 3.27E-02 | 6.67E+00  | 6.67E+00 |
| ENSG00000122483 | CCDC18        | 1.20 | 1.20  | 0.26  | 3.23E-02 | 6.67E+00  | 6.67E+00 |
| ENSG00000243660 | ZNF487P       | 1.30 | 1.30  | 0.38  | 3.78E-02 | 6.67E+00  | 6.67E+00 |
| ENSG00000137414 | FAM8A1        | 0.85 | -1.18 | -0.23 | 3.11E-02 | -6.67E+00 | 6.67E+00 |
| ENSG00000137509 | PRCP          | 1.20 | 1.20  | 0.26  | 3.23E-02 | 6.66E+00  | 6.66E+00 |
| ENSG00000214026 | MRPL23        | 1.17 | 1.17  | 0.23  | 3.10E-02 | 6.65E+00  | 6.65E+00 |
| ENSG00000237190 | CDKN2AIPNL    | 0.85 | -1.17 | -0.23 | 3.10E-02 | -6.65E+00 | 6.65E+00 |
| ENSG00000138376 | BARD1         | 0.85 | -1.17 | -0.23 | 3.10E-02 | -6.65E+00 | 6.65E+00 |
| ENSG00000095002 | MSH2          | 0.84 | -1.19 | -0.26 | 3.22E-02 | -6.65E+00 | 6.65E+00 |
| ENSG00000188681 | TEKT4P2       | 1.23 | 1.23  | 0.30  | 3.43E-02 | 6.65E+00  | 6.65E+00 |
| ENSG00000102081 | FMR1          | 1.18 | 1.18  | 0.24  | 3.16E-02 | 6.65E+00  | 6.65E+00 |
| ENSG00000080947 | CROCCP3       | 0.78 | -1.28 | -0.35 | 3.69E-02 | -6.64E+00 | 6.64E+00 |
| ENSG00000021762 | OSBPL5        | 1.20 | 1.20  | 0.26  | 3.27E-02 | 6.64E+00  | 6.64E+00 |
| ENSG00000180398 | MCFD2         | 1.18 | 1.18  | 0.24  | 3.18E-02 | 6.63E+00  | 6.63E+00 |
| ENSG00000185697 | MYBL1         | 1.20 | 1.20  | 0.27  | 3.29E-02 | 6.63E+00  | 6.63E+00 |
| ENSG00000104812 | GY51          | 0.84 | -1.19 | -0.25 | 3.23E-02 | -6.62E+00 | 6.62E+00 |
| ENSG00000135404 | CD63          | 1.20 | 1.20  | 0.26  | 3.26E-02 | 6.62E+00  | 6.62E+00 |
| ENSG00000060971 | ACAA1         | 0.82 | -1.23 | -0.29 | 3.44E-02 | -6.62E+00 | 6.62E+00 |
| ENSG00000133247 | SUV420H2      | 1.28 | 1.28  | 0.36  | 3.75E-02 | 6.61E+00  | 6.61E+00 |
| ENSG00000179152 | TCAIM         | 1.19 | 1.19  | 0.25  | 3.23E-02 | 6.61E+00  | 6.61E+00 |
| ENSG00000253710 | ALG11         | 0.82 | -1.22 | -0.29 | 3.43E-02 | -6.61E+00 | 6.61E+00 |
| ENSG00000012963 | UBR7          | 0.85 | -1.18 | -0.24 | 3.19E-02 | -6.61E+00 | 6.61E+00 |
| ENSG00000135365 | PHF21A        | 1.19 | 1.19  | 0.25  | 3.25E-02 | 6.61E+00  | 6.61E+00 |
| ENSG00000140939 | NOL3          | 0.79 | -1.26 | -0.34 | 3.65E-02 | -6.60E+00 | 6.60E+00 |
| ENSG00000106462 | EZH2          | 0.84 | -1.19 | -0.25 | 3.27E-02 | -6.60E+00 | 6.60E+00 |
| ENSG00000166963 | MAP1A         | 0.79 | -1.27 | -0.34 | 3.70E-02 | -6.60E+00 | 6.60E+00 |
| ENSG00000161298 | ZNF382        | 1.24 | 1.24  | 0.31  | 3.52E-02 | 6.60E+00  | 6.60E+00 |
| ENSG00000167566 | NCKAP5L       | 1.18 | 1.18  | 0.24  | 3.20E-02 | 6.59E+00  | 6.59E+00 |
| ENSG00000155959 | VBP1          | 0.84 | -1.19 | -0.26 | 3.28E-02 | -6.59E+00 | 6.59E+00 |
| ENSG00000184076 | UQCR10        | 0.83 | -1.20 | -0.26 | 3.31E-02 | -6.59E+00 | 6.59E+00 |
| ENSG00000022277 | RTFDC1        | 0.85 | -1.18 | -0.24 | 3.21E-02 | -6.59E+00 | 6.59E+00 |
| ENSG00000120798 | NR2C1         | 0.84 | -1.19 | -0.25 | 3.26E-02 | -6.58E+00 | 6.58E+00 |
| ENSG00000167113 | COQ4          | 0.85 | -1.18 | -0.24 | 3.21E-02 | -6.58E+00 | 6.58E+00 |
| ENSG00000116161 | CACYBP        | 0.85 | -1.18 | -0.24 | 3.23E-02 | -6.57E+00 | 6.57E+00 |
| ENSG00000133302 | ANKRD32       | 0.81 | -1.24 | -0.31 | 3.56E-02 | -6.57E+00 | 6.57E+00 |
| ENSG00000110057 | UNC93B1       | 1.24 | 1.24  | 0.31  | 3.57E-02 | 6.56E+00  | 6.56E+00 |
| ENSG00000055070 | SZRD1         | 1.26 | 1.26  | 0.33  | 3.69E-02 | 6.56E+00  | 6.56E+00 |
| ENSG00000227345 | PARG          | 1.18 | 1.18  | 0.24  | 3.26E-02 | 6.56E+00  | 6.56E+00 |
| ENSG00000146386 | ABRACL        | 1.21 | 1.21  | 0.28  | 3.42E-02 | 6.56E+00  | 6.56E+00 |
| ENSG00000160785 | SLC25A44      | 0.85 | -1.17 | -0.23 | 3.20E-02 | -6.55E+00 | 6.55E+00 |
| ENSG00000164162 | ANAPC10       | 0.85 | -1.18 | -0.24 | 3.27E-02 | -6.54E+00 | 6.54E+00 |
| ENSG00000247572 | CTC-281B15.1  | 0.75 | -1.33 | -0.41 | 4.11E-02 | -6.54E+00 | 6.54E+00 |
| ENSG00000276966 | HIST1H4E      | 0.81 | -1.24 | -0.31 | 3.57E-02 | -6.54E+00 | 6.54E+00 |
| ENSG00000253797 | UTP14C        | 1.18 | 1.18  | 0.23  | 3.23E-02 | 6.54E+00  | 6.54E+00 |
| ENSG00000146872 | TLK2          | 1.17 | 1.17  | 0.23  | 3.23E-02 | 6.53E+00  | 6.53E+00 |
| ENSG00000129925 | TMEM8A        | 0.85 | -1.18 | -0.24 | 3.27E-02 | -6.53E+00 | 6.53E+00 |
| ENSG00000225663 | FAM195B       | 1.22 | 1.22  | 0.29  | 3.49E-02 | 6.53E+00  | 6.53E+00 |
| ENSG00000060749 | QSER1         | 1.22 | 1.22  | 0.28  | 3.48E-02 | 6.53E+00  | 6.53E+00 |
| ENSG00000137145 | DENND4C       | 1.22 | 1.22  | 0.29  | 3.50E-02 | 6.53E+00  | 6.53E+00 |
| ENSG00000265688 | MAFG-AS1      | 1.34 | 1.34  | 0.42  | 4.22E-02 | 6.52E+00  | 6.52E+00 |
| ENSG00000198162 | MAN1A2        | 1.19 | 1.19  | 0.25  | 3.34E-02 | 6.50E+00  | 6.50E+00 |
| ENSG00000088970 | PLK1S1        | 1.23 | 1.23  | 0.30  | 3.59E-02 | 6.49E+00  | 6.49E+00 |
| ENSG00000188243 | COMMD6        | 1.20 | 1.20  | 0.27  | 3.44E-02 | 6.49E+00  | 6.49E+00 |
| ENSG00000105197 | TIMM50        | 0.85 | -1.17 | -0.23 | 3.26E-02 | -6.48E+00 | 6.48E+00 |
| ENSG00000092020 | PPP2R3C       | 0.83 | -1.21 | -0.27 | 3.47E-02 | -6.48E+00 | 6.48E+00 |
| ENSG00000167671 | UBXN6         | 0.85 | -1.17 | -0.23 | 3.29E-02 | -6.48E+00 | 6.48E+00 |
| ENSG00000160908 | ZNF394        | 1.17 | 1.17  | 0.23  | 3.29E-02 | 6.47E+00  | 6.47E+00 |
| ENSG00000165185 | KIAA1958      | 0.77 | -1.29 | -0.37 | 3.99E-02 | -6.47E+00 | 6.47E+00 |
| ENSG00000112651 | MRPL2         | 0.84 | -1.18 | -0.24 | 3.36E-02 | -6.46E+00 | 6.46E+00 |
| ENSG00000232112 | TMA7          | 0.82 | -1.21 | -0.28 | 3.53E-02 | -6.46E+00 | 6.46E+00 |
| ENSG00000256771 | ZNF253        | 1.22 | 1.22  | 0.29  | 3.57E-02 | 6.46E+00  | 6.46E+00 |
| ENSG00000101972 | STAG2         | 1.27 | 1.27  | 0.34  | 3.86E-02 | 6.46E+00  | 6.46E+00 |
| ENSG00000102781 | KATNAL1       | 1.18 | 1.18  | 0.24  | 3.34E-02 | 6.45E+00  | 6.45E+00 |
| ENSG00000183765 | CHEK2         | 0.85 | -1.17 | -0.23 | 3.31E-02 | -6.45E+00 | 6.45E+00 |
| ENSG00000165915 | SLC39A13      | 1.17 | 1.17  | 0.23  | 3.30E-02 | 6.45E+00  | 6.45E+00 |
| ENSG00000025772 | TOMM34        | 0.84 | -1.19 | -0.25 | 3.42E-02 | -6.45E+00 | 6.45E+00 |
| ENSG00000272047 | GTF2H5        | 1.18 | 1.18  | 0.24  | 3.34E-02 | 6.45E+00  | 6.45E+00 |

|                 |               |      |       |       |          |           |          |
|-----------------|---------------|------|-------|-------|----------|-----------|----------|
| ENSG00000141873 | SLC39A3       | 0.83 | -1.20 | -0.27 | 3.48E-02 | -6.44E+00 | 6.44E+00 |
| ENSG00000008294 | SPAG9         | 1.18 | 1.18  | 0.24  | 3.36E-02 | 6.44E+00  | 6.44E+00 |
| ENSG00000155304 | HSPA13        | 1.28 | 1.28  | 0.35  | 3.93E-02 | 6.44E+00  | 6.44E+00 |
| ENSG00000173530 | TNFRSF10D     | 1.18 | 1.18  | 0.24  | 3.37E-02 | 6.44E+00  | 6.44E+00 |
| ENSG00000025293 | PHF20         | 0.85 | -1.18 | -0.24 | 3.39E-02 | -6.43E+00 | 6.43E+00 |
| ENSG00000080603 | SRCAP         | 1.18 | 1.18  | 0.23  | 3.36E-02 | 6.42E+00  | 6.42E+00 |
| ENSG00000109911 | ELP4          | 0.85 | -1.18 | -0.23 | 3.35E-02 | -6.42E+00 | 6.42E+00 |
| ENSG00000161021 | MAML1         | 0.83 | -1.21 | -0.28 | 3.56E-02 | -6.42E+00 | 6.42E+00 |
| ENSG00000054983 | GALC          | 1.17 | 1.17  | 0.23  | 3.33E-02 | 6.41E+00  | 6.41E+00 |
| ENSG00000189159 | HN1           | 1.18 | 1.18  | 0.24  | 3.40E-02 | 6.41E+00  | 6.41E+00 |
| ENSG00000125741 | OPA3          | 0.85 | -1.18 | -0.23 | 3.37E-02 | -6.41E+00 | 6.41E+00 |
| ENSG00000179119 | SPTY2D1       | 1.17 | 1.17  | 0.23  | 3.35E-02 | 6.40E+00  | 6.40E+00 |
| ENSG00000137409 | MTCH1         | 1.18 | 1.18  | 0.24  | 3.41E-02 | 6.40E+00  | 6.40E+00 |
| ENSG00000167257 | RNF214        | 1.23 | 1.23  | 0.30  | 3.72E-02 | 6.39E+00  | 6.39E+00 |
| ENSG00000167380 | ZNF226        | 0.85 | -1.18 | -0.23 | 3.38E-02 | -6.39E+00 | 6.39E+00 |
| ENSG00000189180 | ZNF33A        | 1.23 | 1.23  | 0.29  | 3.68E-02 | 6.39E+00  | 6.39E+00 |
| ENSG00000124193 | SRSF6         | 0.85 | -1.18 | -0.24 | 3.43E-02 | -6.38E+00 | 6.38E+00 |
| ENSG00000196428 | TSC22D2       | 1.17 | 1.17  | 0.23  | 3.38E-02 | 6.38E+00  | 6.38E+00 |
| ENSG00000141905 | NFIC          | 1.19 | 1.19  | 0.25  | 3.46E-02 | 6.38E+00  | 6.38E+00 |
| ENSG00000165792 | METTL17       | 0.85 | -1.17 | -0.23 | 3.37E-02 | -6.37E+00 | 6.37E+00 |
| ENSG00000167202 | TBC1D2B       | 1.18 | 1.18  | 0.24  | 3.41E-02 | 6.37E+00  | 6.37E+00 |
| ENSG00000143436 | MRPL9         | 1.18 | 1.18  | 0.24  | 3.41E-02 | 6.37E+00  | 6.37E+00 |
| ENSG00000260916 | CCPG1         | 0.83 | -1.21 | -0.28 | 3.61E-02 | -6.37E+00 | 6.37E+00 |
| ENSG00000170734 | POLH          | 1.22 | 1.22  | 0.29  | 3.66E-02 | 6.37E+00  | 6.37E+00 |
| ENSG00000163444 | TMEM183A      | 0.85 | -1.18 | -0.24 | 3.44E-02 | -6.37E+00 | 6.37E+00 |
| ENSG00000221886 | C5orf54       | 0.79 | -1.27 | -0.34 | 3.95E-02 | -6.36E+00 | 6.36E+00 |
| ENSG00000122566 | HNRNPA2B1     | 0.80 | -1.26 | -0.33 | 3.90E-02 | -6.36E+00 | 6.36E+00 |
| ENSG00000270066 | SCARNA2       | 0.79 | -1.26 | -0.34 | 3.93E-02 | -6.36E+00 | 6.36E+00 |
| ENSG00000145390 | USP53         | 1.25 | 1.25  | 0.32  | 3.83E-02 | 6.36E+00  | 6.36E+00 |
| ENSG00000011523 | CEP68         | 0.86 | -1.17 | -0.23 | 3.38E-02 | -6.36E+00 | 6.36E+00 |
| ENSG00000277161 | PIGW          | 0.82 | -1.22 | -0.29 | 3.67E-02 | -6.36E+00 | 6.36E+00 |
| ENSG00000134644 | PUM1          | 1.18 | 1.18  | 0.24  | 3.44E-02 | 6.35E+00  | 6.35E+00 |
| ENSG00000135835 | KIAA1614      | 0.77 | -1.30 | -0.38 | 4.17E-02 | -6.35E+00 | 6.35E+00 |
| ENSG00000136754 | ABI1          | 1.18 | 1.18  | 0.23  | 3.43E-02 | 6.35E+00  | 6.35E+00 |
| ENSG00000077235 | GTF3C1        | 1.21 | 1.21  | 0.28  | 3.66E-02 | 6.35E+00  | 6.35E+00 |
| ENSG00000177600 | RPLP2         | 0.83 | -1.20 | -0.27 | 3.60E-02 | -6.34E+00 | 6.34E+00 |
| ENSG00000173511 | VEGFB         | 1.20 | 1.20  | 0.27  | 3.61E-02 | 6.34E+00  | 6.34E+00 |
|                 | RP11-181C21.6 | 0.80 | -1.25 | -0.33 | 3.92E-02 | -6.34E+00 | 6.34E+00 |
| ENSG00000120337 | TNFSF18       | 0.82 | -1.22 | -0.28 | 3.69E-02 | -6.33E+00 | 6.33E+00 |
| ENSG00000087460 | GNAS          | 1.19 | 1.19  | 0.25  | 3.54E-02 | 6.33E+00  | 6.33E+00 |
| ENSG00000143418 | CERS2         | 1.21 | 1.21  | 0.27  | 3.65E-02 | 6.33E+00  | 6.33E+00 |
| ENSG00000187391 | MAGI2         | 1.29 | 1.29  | 0.37  | 4.16E-02 | 6.33E+00  | 6.33E+00 |
| ENSG00000143429 | AC027612.6    | 1.24 | 1.24  | 0.31  | 3.86E-02 | 6.32E+00  | 6.32E+00 |
| ENSG00000117122 | MFAP2         | 1.18 | 1.18  | 0.24  | 3.51E-02 | 6.31E+00  | 6.31E+00 |
| ENSG00000124596 | OARD1         | 1.18 | 1.18  | 0.24  | 3.50E-02 | 6.30E+00  | 6.30E+00 |
| ENSG00000259345 | RP11-624L4.1  | 1.35 | 1.35  | 0.43  | 4.57E-02 | 6.29E+00  | 6.29E+00 |
| ENSG00000147862 | NFIB          | 1.19 | 1.19  | 0.25  | 3.56E-02 | 6.29E+00  | 6.29E+00 |
| ENSG00000163029 | SMC6          | 1.21 | 1.21  | 0.27  | 3.67E-02 | 6.29E+00  | 6.29E+00 |
| ENSG00000104221 | BRF2          | 0.84 | -1.19 | -0.25 | 3.59E-02 | -6.29E+00 | 6.29E+00 |
| ENSG00000122435 | TRMT13        | 1.21 | 1.21  | 0.28  | 3.73E-02 | 6.29E+00  | 6.29E+00 |
| ENSG00000269051 | CTD-2245F17.3 | 1.33 | 1.33  | 0.41  | 4.48E-02 | 6.29E+00  | 6.29E+00 |
| ENSG00000148484 | RSU1          | 1.18 | 1.18  | 0.24  | 3.52E-02 | 6.29E+00  | 6.29E+00 |
| ENSG00000132604 | TERF2         | 1.20 | 1.20  | 0.27  | 3.66E-02 | 6.29E+00  | 6.29E+00 |
| ENSG00000074696 | PTPLAD1       | 0.85 | -1.18 | -0.24 | 3.53E-02 | -6.29E+00 | 6.29E+00 |
| ENSG00000149929 | HIRIP3        | 0.77 | -1.29 | -0.37 | 4.24E-02 | -6.28E+00 | 6.28E+00 |
| ENSG00000110719 | TCIRG1        | 0.85 | -1.17 | -0.23 | 3.48E-02 | -6.28E+00 | 6.28E+00 |
| ENSG00000137947 | GTF2B         | 1.17 | 1.17  | 0.23  | 3.49E-02 | 6.27E+00  | 6.27E+00 |
| ENSG00000162244 | RPL29         | 0.84 | -1.19 | -0.25 | 3.60E-02 | -6.27E+00 | 6.27E+00 |
| ENSG00000177565 | TBL1XR1       | 1.19 | 1.19  | 0.25  | 3.59E-02 | 6.26E+00  | 6.26E+00 |
| ENSG00000114739 | ACVR2B        | 1.28 | 1.28  | 0.35  | 4.15E-02 | 6.26E+00  | 6.26E+00 |
| ENSG00000177570 | SAMD12        | 0.82 | -1.22 | -0.29 | 3.82E-02 | -6.26E+00 | 6.26E+00 |
| ENSG00000156304 | SCAF4         | 1.19 | 1.19  | 0.25  | 3.61E-02 | 6.25E+00  | 6.25E+00 |
| ENSG00000134419 | RPS15A        | 0.83 | -1.20 | -0.26 | 3.69E-02 | -6.24E+00 | 6.24E+00 |
| ENSG00000136240 | KDELRL2       | 0.83 | -1.20 | -0.26 | 3.70E-02 | -6.24E+00 | 6.24E+00 |
| ENSG00000114544 | SLC41A3       | 1.18 | 1.18  | 0.23  | 3.55E-02 | 6.24E+00  | 6.24E+00 |
| ENSG00000141933 | TPGS1         | 1.20 | 1.20  | 0.26  | 3.70E-02 | 6.24E+00  | 6.24E+00 |
| ENSG00000227199 | ST7-AS1       | 1.36 | 1.36  | 0.45  | 4.79E-02 | 6.24E+00  | 6.24E+00 |
| ENSG00000186300 | ZNF555        | 1.19 | 1.19  | 0.25  | 3.64E-02 | 6.23E+00  | 6.23E+00 |
| ENSG00000075856 | SART3         | 0.84 | -1.18 | -0.24 | 3.62E-02 | -6.23E+00 | 6.23E+00 |
| ENSG00000131115 | ZNF227        | 1.19 | 1.19  | 0.25  | 3.66E-02 | 6.22E+00  | 6.22E+00 |
| ENSG00000164169 | PRMT10        | 1.18 | 1.18  | 0.24  | 3.58E-02 | 6.22E+00  | 6.22E+00 |
| ENSG00000178163 | ZNF518B       | 1.19 | 1.19  | 0.25  | 3.68E-02 | 6.22E+00  | 6.22E+00 |
| ENSG00000221838 | AP4M1         | 0.85 | -1.17 | -0.23 | 3.55E-02 | -6.22E+00 | 6.22E+00 |
| ENSG00000110583 | NAA40         | 0.85 | -1.17 | -0.23 | 3.55E-02 | -6.22E+00 | 6.22E+00 |
| ENSG00000116001 | TIA1          | 1.21 | 1.21  | 0.27  | 3.76E-02 | 6.22E+00  | 6.22E+00 |
| ENSG00000184640 | SEPT9         | 1.21 | 1.21  | 0.27  | 3.77E-02 | 6.22E+00  | 6.22E+00 |
| ENSG00000138785 | INTS12        | 1.19 | 1.19  | 0.25  | 3.64E-02 | 6.21E+00  | 6.21E+00 |
| ENSG00000086504 | MRPL28        | 0.85 | -1.17 | -0.23 | 3.55E-02 | -6.21E+00 | 6.21E+00 |
| ENSG00000136271 | DDX56         | 0.85 | -1.17 | -0.23 | 3.58E-02 | -6.21E+00 | 6.21E+00 |

|                  |             |      |       |       |          |           |          |
|------------------|-------------|------|-------|-------|----------|-----------|----------|
| ENSG00000147509  | RGS20       | 1.33 | 1.33  | 0.42  | 4.61E-02 | 6.21E+00  | 6.21E+00 |
| ENSG00000110931  | CAMKK2      | 0.85 | -1.18 | -0.24 | 3.62E-02 | -6.20E+00 | 6.20E+00 |
| ENSG00000181704  | YIPF6       | 0.85 | -1.18 | -0.24 | 3.64E-02 | -6.19E+00 | 6.19E+00 |
| ENSG00000006451  | RALA        | 1.25 | 1.25  | 0.32  | 4.05E-02 | 6.19E+00  | 6.19E+00 |
| ENSG00000065154  | OAT         | 1.18 | 1.18  | 0.24  | 3.66E-02 | 6.18E+00  | 6.18E+00 |
| ENSG000000257591 | ZNF625      | 0.80 | -1.25 | -0.32 | 4.08E-02 | -6.18E+00 | 6.18E+00 |
| ENSG00000245060  | CTC-205M6.2 | 0.80 | -1.25 | -0.33 | 4.12E-02 | -6.18E+00 | 6.18E+00 |
| ENSG00000177485  | ZBTB33      | 1.24 | 1.24  | 0.31  | 4.03E-02 | 6.18E+00  | 6.18E+00 |
| ENSG00000179476  | C14orf28    | 1.27 | 1.27  | 0.35  | 4.25E-02 | 6.18E+00  | 6.18E+00 |
| ENSG00000075945  | KIFAP3      | 1.17 | 1.17  | 0.22  | 3.57E-02 | 6.17E+00  | 6.17E+00 |
| ENSG00000090238  | YPEL3       | 1.20 | 1.20  | 0.26  | 3.77E-02 | 6.17E+00  | 6.17E+00 |
| ENSG00000142230  | SAE1        | 0.85 | -1.18 | -0.24 | 3.65E-02 | -6.17E+00 | 6.17E+00 |
| ENSG00000181690  | PLAG1       | 1.24 | 1.24  | 0.31  | 4.03E-02 | 6.16E+00  | 6.16E+00 |
| ENSG00000101363  | MANBAL      | 0.81 | -1.24 | -0.31 | 4.07E-02 | -6.15E+00 | 6.15E+00 |
| ENSG00000197150  | ABCB8       | 0.84 | -1.19 | -0.25 | 3.77E-02 | -6.15E+00 | 6.15E+00 |
| ENSG00000151093  | OXSM        | 1.19 | 1.19  | 0.25  | 3.74E-02 | 6.14E+00  | 6.14E+00 |
| ENSG00000140280  | LYSMD2      | 0.83 | -1.21 | -0.27 | 3.85E-02 | -6.14E+00 | 6.14E+00 |
| ENSG00000170962  | PDGFD       | 1.22 | 1.22  | 0.29  | 3.95E-02 | 6.14E+00  | 6.14E+00 |
| ENSG00000158201  | ABHD3       | 0.83 | -1.21 | -0.27 | 3.86E-02 | -6.14E+00 | 6.14E+00 |
| ENSG00000137218  | FRS3        | 1.32 | 1.32  | 0.40  | 4.65E-02 | 6.14E+00  | 6.14E+00 |
| ENSG00000204560  | DHX16       | 0.84 | -1.18 | -0.24 | 3.73E-02 | -6.13E+00 | 6.13E+00 |
| ENSG00000145780  | FEM1C       | 1.17 | 1.17  | 0.23  | 3.65E-02 | 6.12E+00  | 6.12E+00 |
| ENSG00000135829  | DHX9        | 1.18 | 1.18  | 0.24  | 3.72E-02 | 6.11E+00  | 6.11E+00 |
| ENSG00000272742  | PAIP2       | 0.85 | -1.17 | -0.23 | 3.69E-02 | -6.10E+00 | 6.10E+00 |
| ENSG00000235162  | C12orf75    | 0.85 | -1.17 | -0.23 | 3.68E-02 | -6.10E+00 | 6.10E+00 |
| ENSG00000174842  | GLMN        | 0.85 | -1.17 | -0.23 | 3.70E-02 | -6.10E+00 | 6.10E+00 |
| ENSG00000173588  | CCDC41      | 0.84 | -1.20 | -0.26 | 3.85E-02 | -6.09E+00 | 6.09E+00 |
| ENSG00000117174  | ZNHIT6      | 0.84 | -1.19 | -0.24 | 3.80E-02 | -6.08E+00 | 6.08E+00 |
| ENSG00000169683  | LRRC45      | 0.85 | -1.17 | -0.23 | 3.74E-02 | -6.07E+00 | 6.07E+00 |
| ENSG00000067704  | IARS2       | 1.18 | 1.18  | 0.24  | 3.77E-02 | 6.06E+00  | 6.06E+00 |
| ENSG00000182400  | TRAPPC6B    | 1.17 | 1.17  | 0.23  | 3.73E-02 | 6.06E+00  | 6.06E+00 |
| ENSG00000166889  | PATL1       | 1.17 | 1.17  | 0.23  | 3.75E-02 | 6.05E+00  | 6.05E+00 |
| ENSG00000009844  | VTA1        | 1.18 | 1.18  | 0.24  | 3.79E-02 | 6.05E+00  | 6.05E+00 |
| ENSG00000118655  | DCLRE1B     | 0.85 | -1.17 | -0.23 | 3.76E-02 | -6.04E+00 | 6.04E+00 |
| ENSG00000184898  | RBM43       | 0.84 | -1.19 | -0.25 | 3.88E-02 | -6.04E+00 | 6.04E+00 |
| ENSG00000165480  | SKA3        | 0.85 | -1.18 | -0.24 | 3.81E-02 | -6.04E+00 | 6.04E+00 |
| ENSG00000103035  | PSMD7       | 0.85 | -1.18 | -0.24 | 3.82E-02 | -6.03E+00 | 6.03E+00 |
| ENSG00000112365  | ZBTB24      | 0.85 | -1.18 | -0.24 | 3.83E-02 | -6.03E+00 | 6.03E+00 |
| ENSG00000111850  | C6orf162    | 0.82 | -1.21 | -0.28 | 4.06E-02 | -6.03E+00 | 6.03E+00 |
| ENSG00000120896  | SORBS3      | 1.19 | 1.19  | 0.25  | 3.89E-02 | 6.01E+00  | 6.01E+00 |
| ENSG00000108960  | MMD         | 0.84 | -1.19 | -0.25 | 3.92E-02 | -6.00E+00 | 6.00E+00 |
| ENSG00000197586  | ENTPD6      | 0.86 | -1.17 | -0.22 | 3.79E-02 | -6.00E+00 | 6.00E+00 |
| ENSG00000111328  | CDK2AP1     | 1.17 | 1.17  | 0.23  | 3.82E-02 | 6.00E+00  | 6.00E+00 |
| ENSG00000154027  | AK5         | 0.85 | -1.18 | -0.24 | 3.87E-02 | -6.00E+00 | 6.00E+00 |
| ENSG00000165288  | BRWD3       | 1.23 | 1.23  | 0.30  | 4.21E-02 | 6.00E+00  | 6.00E+00 |
| ENSG00000165997  | ARL5B       | 1.26 | 1.26  | 0.34  | 4.44E-02 | 5.99E+00  | 5.99E+00 |
| ENSG00000139505  | MTMR6       | 1.19 | 1.19  | 0.25  | 3.93E-02 | 5.99E+00  | 5.99E+00 |
| ENSG00000099904  | ZDHHC8      | 1.20 | 1.20  | 0.26  | 4.02E-02 | 5.99E+00  | 5.99E+00 |
| ENSG00000092820  | EZR         | 1.18 | 1.18  | 0.24  | 3.88E-02 | 5.98E+00  | 5.98E+00 |
| ENSG00000166669  | ATF7IP2     | 1.20 | 1.20  | 0.27  | 4.05E-02 | 5.98E+00  | 5.98E+00 |
| ENSG00000102931  | ARL2BP      | 0.84 | -1.18 | -0.24 | 3.93E-02 | -5.98E+00 | 5.98E+00 |
| ENSG00000074054  | CLASP1      | 1.18 | 1.18  | 0.23  | 3.88E-02 | 5.98E+00  | 5.98E+00 |
| ENSG00000056050  | C4orf27     | 0.85 | -1.18 | -0.24 | 3.89E-02 | -5.97E+00 | 5.97E+00 |
| ENSG00000151779  | NBAS        | 1.17 | 1.17  | 0.23  | 3.86E-02 | 5.97E+00  | 5.97E+00 |
| ENSG00000090924  | PLEKHG2     | 1.18 | 1.18  | 0.24  | 3.92E-02 | 5.97E+00  | 5.97E+00 |
| ENSG00000084764  | MAPRE3      | 1.33 | 1.33  | 0.42  | 5.00E-02 | 5.97E+00  | 5.97E+00 |
| ENSG00000124788  | ATXN1       | 1.18 | 1.18  | 0.24  | 3.93E-02 | 5.97E+00  | 5.97E+00 |
| ENSG00000149313  | AASDHPPT    | 1.19 | 1.19  | 0.25  | 3.99E-02 | 5.96E+00  | 5.96E+00 |
| ENSG00000215883  | CYB5RL      | 0.82 | -1.22 | -0.29 | 4.23E-02 | -5.95E+00 | 5.95E+00 |
| ENSG00000106069  | CHN2        | 0.81 | -1.24 | -0.31 | 4.33E-02 | -5.95E+00 | 5.95E+00 |
| ENSG00000138777  | PPA2        | 0.85 | -1.18 | -0.24 | 3.92E-02 | -5.95E+00 | 5.95E+00 |
| ENSG00000145868  | FBXO38      | 1.17 | 1.17  | 0.23  | 3.88E-02 | 5.95E+00  | 5.95E+00 |
| ENSG00000136643  | RPS6KC1     | 1.17 | 1.17  | 0.22  | 3.86E-02 | 5.94E+00  | 5.94E+00 |
| ENSG00000245532  | NEAT1       | 1.18 | 1.18  | 0.24  | 3.93E-02 | 5.94E+00  | 5.94E+00 |
| ENSG00000280102  | RN7SL2      | 0.77 | -1.30 | -0.38 | 4.79E-02 | -5.93E+00 | 5.93E+00 |
| ENSG00000197217  | ENTPD4      | 1.17 | 1.17  | 0.23  | 3.90E-02 | 5.92E+00  | 5.92E+00 |
| ENSG00000214717  | ZBED1       | 1.17 | 1.17  | 0.23  | 3.93E-02 | 5.92E+00  | 5.92E+00 |
| ENSG00000140497  | SCAMP2      | 1.17 | 1.17  | 0.23  | 3.92E-02 | 5.91E+00  | 5.91E+00 |
| ENSG00000089009  | RPL6        | 0.85 | -1.18 | -0.24 | 3.99E-02 | -5.91E+00 | 5.91E+00 |
| ENSG00000141756  | FKBP10      | 0.85 | -1.18 | -0.24 | 4.01E-02 | -5.90E+00 | 5.90E+00 |
| ENSG00000137817  | PARP6       | 0.85 | -1.17 | -0.23 | 3.95E-02 | -5.90E+00 | 5.90E+00 |
| ENSG00000136518  | ACTL6A      | 0.85 | -1.17 | -0.23 | 3.94E-02 | -5.90E+00 | 5.90E+00 |
| ENSG00000189164  | ZNF527      | 0.82 | -1.22 | -0.29 | 4.32E-02 | -5.89E+00 | 5.89E+00 |
| ENSG00000163946  | FAM208A     | 1.23 | 1.23  | 0.30  | 4.38E-02 | 5.88E+00  | 5.88E+00 |
| ENSG00000169020  | ATP5I       | 0.82 | -1.22 | -0.29 | 4.34E-02 | -5.88E+00 | 5.88E+00 |
| ENSG00000104177  | MYEF2       | 0.83 | -1.21 | -0.27 | 4.22E-02 | -5.87E+00 | 5.87E+00 |
| ENSG00000197756  | RPL37A      | 0.82 | -1.22 | -0.28 | 4.30E-02 | -5.87E+00 | 5.87E+00 |
| ENSG00000159023  | EPB41       | 1.17 | 1.17  | 0.23  | 4.01E-02 | 5.87E+00  | 5.87E+00 |
| ENSG00000166734  | CASC4       | 1.18 | 1.18  | 0.23  | 4.02E-02 | 5.87E+00  | 5.87E+00 |

|                 |            |      |       |       |          |           |          |
|-----------------|------------|------|-------|-------|----------|-----------|----------|
| ENSG00000160408 | ST6GALNAC6 | 1.17 | 1.17  | 0.23  | 3.98E-02 | 5.86E+00  | 5.86E+00 |
| ENSG00000160932 | LY6E       | 0.85 | -1.17 | -0.23 | 4.00E-02 | -5.86E+00 | 5.86E+00 |
| ENSG00000183530 | PRR14L     | 1.18 | 1.18  | 0.23  | 4.03E-02 | 5.86E+00  | 5.86E+00 |
| ENSG00000175866 | BAIAP2     | 0.79 | -1.26 | -0.34 | 4.66E-02 | -5.86E+00 | 5.86E+00 |
| ENSG00000060491 | OGFR       | 1.16 | 1.16  | 0.22  | 3.94E-02 | 5.85E+00  | 5.85E+00 |
| ENSG00000113569 | NUP155     | 0.85 | -1.18 | -0.23 | 4.04E-02 | -5.85E+00 | 5.85E+00 |
| ENSG00000159322 | ADPGK      | 0.86 | -1.17 | -0.22 | 3.99E-02 | -5.84E+00 | 5.84E+00 |
| ENSG00000248124 | RRN3P1     | 0.83 | -1.20 | -0.26 | 4.21E-02 | -5.84E+00 | 5.84E+00 |
| ENSG00000104517 | UBR5       | 1.18 | 1.18  | 0.23  | 4.06E-02 | 5.83E+00  | 5.83E+00 |
| ENSG00000133318 | RTN3       | 0.85 | -1.18 | -0.23 | 4.06E-02 | -5.83E+00 | 5.83E+00 |
| ENSG00000075426 | FOSL2      | 1.18 | 1.18  | 0.24  | 4.13E-02 | 5.83E+00  | 5.83E+00 |
| ENSG00000136504 | KAT7       | 0.85 | -1.18 | -0.24 | 4.08E-02 | -5.83E+00 | 5.83E+00 |
| ENSG00000107281 | NPDC1      | 0.86 | -1.16 | -0.22 | 3.99E-02 | -5.82E+00 | 5.82E+00 |
| ENSG00000221990 | C5orf55    | 1.29 | 1.29  | 0.37  | 4.91E-02 | 5.82E+00  | 5.82E+00 |
| ENSG00000137200 | FTSJD2     | 0.86 | -1.17 | -0.22 | 4.02E-02 | -5.81E+00 | 5.81E+00 |
| ENSG00000003147 | ICA1       | 0.86 | -1.16 | -0.22 | 4.02E-02 | -5.81E+00 | 5.81E+00 |
| ENSG00000120509 | PDZD11     | 0.86 | -1.16 | -0.22 | 4.01E-02 | -5.81E+00 | 5.81E+00 |
| ENSG00000136930 | PSMB7      | 1.17 | 1.17  | 0.23  | 4.10E-02 | 5.80E+00  | 5.80E+00 |
| ENSG00000173992 | CCS        | 0.85 | -1.18 | -0.23 | 4.11E-02 | -5.80E+00 | 5.80E+00 |
| ENSG00000118894 | FAM86A     | 0.84 | -1.18 | -0.24 | 4.17E-02 | -5.80E+00 | 5.80E+00 |
| ENSG00000182831 | C16orf72   | 1.17 | 1.17  | 0.23  | 4.08E-02 | 5.80E+00  | 5.80E+00 |
| ENSG00000111799 | COL12A1    | 1.20 | 1.20  | 0.26  | 4.30E-02 | 5.79E+00  | 5.79E+00 |
| ENSG00000158006 | PAFAH2     | 0.84 | -1.19 | -0.25 | 4.22E-02 | -5.79E+00 | 5.79E+00 |
| ENSG00000083828 | ZNF586     | 0.84 | -1.18 | -0.24 | 4.18E-02 | -5.79E+00 | 5.79E+00 |
| ENSG00000149792 | MRPL49     | 0.86 | -1.17 | -0.23 | 4.08E-02 | -5.79E+00 | 5.79E+00 |
| ENSG00000186312 | CA5BP1     | 1.22 | 1.22  | 0.28  | 4.43E-02 | 5.79E+00  | 5.79E+00 |
| ENSG00000090615 | GOLGA3     | 1.17 | 1.17  | 0.23  | 4.12E-02 | 5.78E+00  | 5.78E+00 |
| ENSG00000124151 | NCOA3      | 0.85 | -1.17 | -0.23 | 4.12E-02 | -5.77E+00 | 5.77E+00 |
| ENSG00000116191 | RALGPS2    | 1.22 | 1.22  | 0.29  | 4.49E-02 | 5.77E+00  | 5.77E+00 |
| ENSG00000164008 | C1orf50    | 0.84 | -1.19 | -0.25 | 4.23E-02 | -5.77E+00 | 5.77E+00 |
| ENSG00000148019 | CEP78      | 0.85 | -1.18 | -0.23 | 4.16E-02 | -5.77E+00 | 5.77E+00 |
| ENSG00000130803 | ZNF317     | 1.18 | 1.18  | 0.24  | 4.17E-02 | 5.77E+00  | 5.77E+00 |
| ENSG00000165506 | DNAAF2     | 1.17 | 1.17  | 0.23  | 4.15E-02 | 5.76E+00  | 5.76E+00 |
| ENSG00000177303 | CASKIN2    | 1.21 | 1.21  | 0.27  | 4.38E-02 | 5.76E+00  | 5.76E+00 |
| ENSG00000086015 | MAST2      | 0.86 | -1.17 | -0.23 | 4.13E-02 | -5.76E+00 | 5.76E+00 |
| ENSG00000183597 | C22orf25   | 1.16 | 1.16  | 0.22  | 4.10E-02 | 5.75E+00  | 5.75E+00 |
| ENSG00000108424 | KPNB1      | 0.84 | -1.19 | -0.25 | 4.26E-02 | -5.74E+00 | 5.74E+00 |
| ENSG00000163961 | RNF168     | 0.85 | -1.18 | -0.24 | 4.27E-02 | -5.73E+00 | 5.73E+00 |
| ENSG00000110080 | ST3GAL4    | 1.20 | 1.20  | 0.26  | 4.39E-02 | 5.73E+00  | 5.73E+00 |
| ENSG00000114853 | ZBTB47     | 1.17 | 1.17  | 0.23  | 4.19E-02 | 5.72E+00  | 5.72E+00 |
| ENSG00000100629 | CEP128     | 0.80 | -1.24 | -0.31 | 4.73E-02 | -5.71E+00 | 5.71E+00 |
| ENSG00000132424 | PNISR      | 0.85 | -1.18 | -0.24 | 4.29E-02 | -5.71E+00 | 5.71E+00 |
| ENSG00000178096 | BOLA1      | 0.83 | -1.21 | -0.27 | 4.47E-02 | -5.71E+00 | 5.71E+00 |
| ENSG00000075151 | EIF4G3     | 0.85 | -1.17 | -0.23 | 4.23E-02 | -5.71E+00 | 5.71E+00 |
| ENSG00000158480 | SPATA2     | 1.24 | 1.24  | 0.32  | 4.76E-02 | 5.70E+00  | 5.70E+00 |
| ENSG00000105483 | CARD8      | 0.85 | -1.18 | -0.23 | 4.25E-02 | -5.70E+00 | 5.70E+00 |
| ENSG00000130244 | FAM98C     | 0.81 | -1.23 | -0.30 | 4.65E-02 | -5.70E+00 | 5.70E+00 |
| ENSG00000109133 | TMEM33     | 0.85 | -1.17 | -0.23 | 4.24E-02 | -5.69E+00 | 5.69E+00 |
| ENSG00000205758 | CRYZL1     | 0.83 | -1.20 | -0.27 | 4.49E-02 | -5.69E+00 | 5.69E+00 |
| ENSG00000120008 | WDR11      | 0.85 | -1.17 | -0.23 | 4.25E-02 | -5.68E+00 | 5.68E+00 |
| ENSG00000173757 | STAT5B     | 1.17 | 1.17  | 0.22  | 4.23E-02 | 5.67E+00  | 5.67E+00 |
| ENSG00000137177 | KIF13A     | 0.85 | -1.17 | -0.23 | 4.25E-02 | -5.67E+00 | 5.67E+00 |
| ENSG00000178896 | EXOSC4     | 0.84 | -1.19 | -0.25 | 4.38E-02 | -5.67E+00 | 5.67E+00 |
| ENSG00000166783 | KIAA0430   | 1.17 | 1.17  | 0.23  | 4.28E-02 | 5.67E+00  | 5.67E+00 |
| ENSG00000230453 | ANKRD18B   | 0.79 | -1.27 | -0.34 | 4.98E-02 | -5.67E+00 | 5.67E+00 |
| ENSG00000106052 | TAX1BP1    | 1.22 | 1.22  | 0.28  | 4.62E-02 | 5.66E+00  | 5.66E+00 |
| ENSG00000159335 | PTMS       | 1.18 | 1.18  | 0.24  | 4.34E-02 | 5.66E+00  | 5.66E+00 |
| ENSG00000278259 | MYO19      | 0.85 | -1.17 | -0.23 | 4.28E-02 | -5.66E+00 | 5.66E+00 |
| ENSG00000068394 | GPKOW      | 0.85 | -1.17 | -0.23 | 4.29E-02 | -5.65E+00 | 5.65E+00 |
| ENSG00000164430 | MB21D1     | 0.84 | -1.19 | -0.25 | 4.47E-02 | -5.64E+00 | 5.64E+00 |
| ENSG00000047621 | C12orf4    | 1.25 | 1.25  | 0.32  | 4.88E-02 | 5.64E+00  | 5.64E+00 |
| ENSG00000146676 | PURB       | 1.18 | 1.18  | 0.24  | 4.38E-02 | 5.64E+00  | 5.64E+00 |
| ENSG00000180182 | MED14      | 0.86 | -1.17 | -0.22 | 4.30E-02 | -5.64E+00 | 5.64E+00 |
| ENSG00000133816 | MICAL2     | 1.18 | 1.18  | 0.23  | 4.36E-02 | 5.63E+00  | 5.63E+00 |
| ENSG00000213190 | MLLT11     | 0.85 | -1.17 | -0.23 | 4.35E-02 | -5.63E+00 | 5.63E+00 |
| ENSG00000164867 | NOS3       | 1.24 | 1.24  | 0.31  | 4.87E-02 | 5.63E+00  | 5.63E+00 |
| ENSG00000135185 | C7orf23    | 0.85 | -1.17 | -0.23 | 4.34E-02 | -5.63E+00 | 5.63E+00 |
| ENSG00000129595 | EPB41L4A   | 0.85 | -1.17 | -0.23 | 4.34E-02 | -5.63E+00 | 5.63E+00 |
| ENSG00000163807 | KIAA1143   | 0.86 | -1.17 | -0.22 | 4.29E-02 | -5.63E+00 | 5.63E+00 |
| ENSG00000169213 | RAB3B      | 1.18 | 1.18  | 0.23  | 4.36E-02 | 5.63E+00  | 5.63E+00 |
| ENSG00000204387 | C6orf48    | 0.85 | -1.18 | -0.23 | 4.37E-02 | -5.63E+00 | 5.63E+00 |
| ENSG00000089094 | KDM2B      | 1.16 | 1.16  | 0.21  | 4.26E-02 | 5.62E+00  | 5.62E+00 |
| ENSG00000175611 | LINC00476  | 0.80 | -1.25 | -0.32 | 4.94E-02 | -5.61E+00 | 5.61E+00 |
| ENSG00000146834 | MEPCE      | 0.86 | -1.16 | -0.22 | 4.31E-02 | -5.60E+00 | 5.60E+00 |
| ENSG00000056586 | RC3H2      | 1.19 | 1.19  | 0.25  | 4.51E-02 | 5.60E+00  | 5.60E+00 |
| ENSG00000105889 | STEAP1B    | 0.86 | -1.16 | -0.22 | 4.31E-02 | -5.60E+00 | 5.60E+00 |
| ENSG00000141503 | MINK1      | 1.17 | 1.17  | 0.23  | 4.39E-02 | 5.60E+00  | 5.60E+00 |
| ENSG00000185340 | GAS2L1     | 1.20 | 1.20  | 0.26  | 4.58E-02 | 5.59E+00  | 5.59E+00 |
| ENSG00000183856 | IQGAP3     | 0.84 | -1.20 | -0.26 | 4.59E-02 | -5.59E+00 | 5.59E+00 |

|                 |           |      |       |       |          |           |          |
|-----------------|-----------|------|-------|-------|----------|-----------|----------|
| ENSG00000196923 | PDLIM7    | 1.16 | 1.16  | 0.22  | 4.32E-02 | 5.58E+00  | 5.58E+00 |
| ENSG00000182362 | YBEY      | 1.23 | 1.23  | 0.30  | 4.84E-02 | 5.58E+00  | 5.58E+00 |
| ENSG00000174231 | PRPF8     | 1.19 | 1.19  | 0.25  | 4.56E-02 | 5.58E+00  | 5.58E+00 |
| ENSG00000149925 | ALDOA     | 0.82 | -1.21 | -0.28 | 4.74E-02 | -5.57E+00 | 5.57E+00 |
| ENSG00000125703 | ATG4C     | 0.85 | -1.18 | -0.23 | 4.46E-02 | -5.57E+00 | 5.57E+00 |
| ENSG00000132879 | FBXO44    | 1.19 | 1.19  | 0.25  | 4.57E-02 | 5.57E+00  | 5.57E+00 |
| ENSG00000104325 | DECR1     | 0.86 | -1.17 | -0.22 | 4.40E-02 | -5.57E+00 | 5.57E+00 |
| ENSG00000169371 | SNUPN     | 0.84 | -1.19 | -0.25 | 4.57E-02 | -5.56E+00 | 5.56E+00 |
| ENSG00000142544 | CTU1      | 1.23 | 1.23  | 0.30  | 4.90E-02 | 5.56E+00  | 5.56E+00 |
| ENSG00000146416 | AIG1      | 1.18 | 1.18  | 0.23  | 4.47E-02 | 5.56E+00  | 5.56E+00 |
| ENSG00000163162 | RNF149    | 1.19 | 1.19  | 0.25  | 4.58E-02 | 5.56E+00  | 5.56E+00 |
| ENSG00000126261 | UBA2      | 0.85 | -1.17 | -0.23 | 4.44E-02 | -5.55E+00 | 5.55E+00 |
| ENSG00000130638 | ATXN10    | 1.16 | 1.16  | 0.22  | 4.39E-02 | 5.55E+00  | 5.55E+00 |
| ENSG00000205181 | LINC00654 | 0.83 | -1.20 | -0.27 | 4.69E-02 | -5.55E+00 | 5.55E+00 |
| ENSG00000113648 | H2AFY     | 1.17 | 1.17  | 0.23  | 4.45E-02 | 5.55E+00  | 5.55E+00 |
| ENSG00000141068 | KSR1      | 0.84 | -1.20 | -0.26 | 4.66E-02 | -5.55E+00 | 5.55E+00 |
| ENSG00000127054 | CPSF3L    | 0.86 | -1.16 | -0.22 | 4.42E-02 | -5.54E+00 | 5.54E+00 |
| ENSG00000164743 | C8orf48   | 1.21 | 1.21  | 0.28  | 4.78E-02 | 5.54E+00  | 5.54E+00 |
| ENSG00000171574 | ZNF584    | 0.84 | -1.20 | -0.26 | 4.67E-02 | -5.54E+00 | 5.54E+00 |
| ENSG00000110851 | PRDM4     | 1.16 | 1.16  | 0.22  | 4.41E-02 | 5.54E+00  | 5.54E+00 |
| ENSG00000137821 | LRRC49    | 1.22 | 1.22  | 0.29  | 4.85E-02 | 5.54E+00  | 5.54E+00 |
| ENSG00000108691 | CCL2      | 1.19 | 1.19  | 0.25  | 4.62E-02 | 5.54E+00  | 5.54E+00 |
| ENSG00000183337 | BCOR      | 1.19 | 1.19  | 0.25  | 4.60E-02 | 5.53E+00  | 5.53E+00 |
| ENSG00000165476 | REEP3     | 0.85 | -1.17 | -0.23 | 4.50E-02 | -5.52E+00 | 5.52E+00 |
| ENSG00000169057 | MECP2     | 1.17 | 1.17  | 0.23  | 4.50E-02 | 5.52E+00  | 5.52E+00 |
| ENSG00000023608 | SNAPC1    | 0.86 | -1.16 | -0.21 | 4.44E-02 | -5.51E+00 | 5.51E+00 |
| ENSG00000119541 | VPS4B     | 1.17 | 1.17  | 0.23  | 4.53E-02 | 5.50E+00  | 5.50E+00 |
| ENSG00000109680 | TBC1D19   | 0.83 | -1.20 | -0.26 | 4.75E-02 | -5.50E+00 | 5.50E+00 |
| ENSG00000112695 | COX7A2    | 0.84 | -1.20 | -0.26 | 4.73E-02 | -5.50E+00 | 5.50E+00 |
| ENSG00000157077 | ZFYVE9    | 0.85 | -1.17 | -0.23 | 4.55E-02 | -5.50E+00 | 5.50E+00 |
| ENSG00000138439 | FAM117B   | 1.20 | 1.20  | 0.27  | 4.80E-02 | 5.49E+00  | 5.49E+00 |
| ENSG00000150938 | CRIM1     | 0.84 | -1.19 | -0.26 | 4.73E-02 | -5.49E+00 | 5.49E+00 |
| ENSG00000101460 | MAP1LC3A  | 0.81 | -1.23 | -0.30 | 4.99E-02 | -5.49E+00 | 5.49E+00 |
| ENSG00000171612 | SLC25A33  | 0.84 | -1.19 | -0.25 | 4.73E-02 | -5.48E+00 | 5.48E+00 |
| ENSG00000105393 | BABAM1    | 0.86 | -1.17 | -0.22 | 4.56E-02 | -5.47E+00 | 5.47E+00 |
| ENSG00000137714 | FDX1      | 0.85 | -1.17 | -0.23 | 4.61E-02 | -5.46E+00 | 5.46E+00 |
| ENSG00000117054 | ACADM     | 0.85 | -1.17 | -0.23 | 4.63E-02 | -5.46E+00 | 5.46E+00 |
| ENSG00000091164 | TXNL1     | 0.85 | -1.17 | -0.23 | 4.62E-02 | -5.46E+00 | 5.46E+00 |
| ENSG00000075218 | GTSE1     | 0.86 | -1.16 | -0.22 | 4.53E-02 | -5.45E+00 | 5.45E+00 |
| ENSG00000136238 | RAC1      | 1.17 | 1.17  | 0.23  | 4.62E-02 | 5.45E+00  | 5.45E+00 |
| ENSG00000197261 | C6orf141  | 1.17 | 1.17  | 0.23  | 4.62E-02 | 5.45E+00  | 5.45E+00 |
| ENSG00000157637 | SLC38A10  | 1.21 | 1.21  | 0.28  | 4.95E-02 | 5.45E+00  | 5.45E+00 |
| ENSG00000125347 | IRF1      | 0.85 | -1.17 | -0.23 | 4.64E-02 | -5.44E+00 | 5.44E+00 |
| ENSG00000183520 | UTP11L    | 0.86 | -1.16 | -0.22 | 4.58E-02 | -5.44E+00 | 5.44E+00 |
| ENSG00000171813 | PWWP2B    | 1.21 | 1.21  | 0.27  | 4.92E-02 | 5.44E+00  | 5.44E+00 |
| ENSG00000115241 | PPM1G     | 0.85 | -1.17 | -0.23 | 4.65E-02 | -5.43E+00 | 5.43E+00 |
| ENSG00000113719 | ERGIC1    | 1.17 | 1.17  | 0.23  | 4.69E-02 | 5.42E+00  | 5.42E+00 |
| ENSG00000213203 | GIMAP1    | 0.86 | -1.16 | -0.21 | 4.57E-02 | -5.42E+00 | 5.42E+00 |
| ENSG00000254093 | PINX1     | 1.17 | 1.17  | 0.23  | 4.67E-02 | 5.42E+00  | 5.42E+00 |
| ENSG00000124659 | TBCC      | 1.16 | 1.16  | 0.22  | 4.60E-02 | 5.41E+00  | 5.41E+00 |
| ENSG00000100138 | NHP2L1    | 0.85 | -1.17 | -0.23 | 4.69E-02 | -5.41E+00 | 5.41E+00 |
| ENSG00000130818 | ZNF426    | 1.16 | 1.16  | 0.22  | 4.60E-02 | 5.41E+00  | 5.41E+00 |
| ENSG00000159685 | CHCHD6    | 0.83 | -1.21 | -0.27 | 4.97E-02 | -5.41E+00 | 5.41E+00 |
| ENSG00000205155 | PSENE1    | 0.84 | -1.19 | -0.25 | 4.86E-02 | -5.41E+00 | 5.41E+00 |
| ENSG00000130958 | SLC35D2   | 1.16 | 1.16  | 0.21  | 4.59E-02 | 5.41E+00  | 5.41E+00 |
| ENSG00000107186 | MPDZ      | 1.20 | 1.20  | 0.26  | 4.91E-02 | 5.40E+00  | 5.40E+00 |
| ENSG00000110917 | MLEC      | 0.85 | -1.18 | -0.24 | 4.76E-02 | -5.40E+00 | 5.40E+00 |
| ENSG00000172375 | C2CD2L    | 1.19 | 1.19  | 0.25  | 4.84E-02 | 5.40E+00  | 5.40E+00 |
| ENSG00000104886 | PLEKHJ1   | 0.86 | -1.17 | -0.22 | 4.68E-02 | -5.40E+00 | 5.40E+00 |
| ENSG00000163026 | C2orf44   | 0.86 | -1.16 | -0.21 | 4.59E-02 | -5.40E+00 | 5.40E+00 |
| ENSG00000148498 | PARD3     | 1.16 | 1.16  | 0.22  | 4.65E-02 | 5.39E+00  | 5.39E+00 |
| ENSG00000100600 | LGMN      | 0.86 | -1.16 | -0.21 | 4.64E-02 | -5.38E+00 | 5.38E+00 |
| ENSG00000175756 | AURKAIP1  | 0.84 | -1.19 | -0.25 | 4.87E-02 | -5.38E+00 | 5.38E+00 |
| ENSG00000186908 | ZDHHC17   | 0.84 | -1.19 | -0.25 | 4.88E-02 | -5.38E+00 | 5.38E+00 |
| ENSG00000150760 | DOCK1     | 1.17 | 1.17  | 0.23  | 4.75E-02 | 5.37E+00  | 5.37E+00 |
| ENSG00000197858 | GPA1      | 1.17 | 1.17  | 0.23  | 4.77E-02 | 5.37E+00  | 5.37E+00 |
| ENSG00000115459 | ELMOD3    | 1.17 | 1.17  | 0.23  | 4.74E-02 | 5.37E+00  | 5.37E+00 |
| ENSG00000163389 | POGLUT1   | 0.86 | -1.17 | -0.22 | 4.73E-02 | -5.37E+00 | 5.37E+00 |
| ENSG00000084070 | SMAP2     | 0.85 | -1.18 | -0.24 | 4.81E-02 | -5.37E+00 | 5.37E+00 |
| ENSG00000143951 | WDPCP     | 1.20 | 1.20  | 0.26  | 4.98E-02 | 5.36E+00  | 5.36E+00 |
| ENSG00000131462 | TUBG1     | 1.19 | 1.19  | 0.25  | 4.92E-02 | 5.36E+00  | 5.36E+00 |
| ENSG00000144802 | NFKBIZ    | 1.16 | 1.16  | 0.22  | 4.71E-02 | 5.36E+00  | 5.36E+00 |
| ENSG00000196072 | BLOC1S2   | 1.17 | 1.17  | 0.23  | 4.79E-02 | 5.35E+00  | 5.35E+00 |
| ENSG00000133943 | C14orf159 | 0.86 | -1.16 | -0.21 | 4.70E-02 | -5.35E+00 | 5.35E+00 |
| ENSG00000116266 | STXBP3    | 0.85 | -1.18 | -0.24 | 4.87E-02 | -5.33E+00 | 5.33E+00 |
| ENSG00000168734 | PKIG      | 1.18 | 1.18  | 0.23  | 4.87E-02 | 5.33E+00  | 5.33E+00 |
| ENSG00000136870 | ZNF189    | 1.16 | 1.16  | 0.21  | 4.71E-02 | 5.33E+00  | 5.33E+00 |
| ENSG00000055332 | EIF2AK2   | 0.85 | -1.17 | -0.23 | 4.87E-02 | -5.32E+00 | 5.32E+00 |
| ENSG00000187713 | TMEM203   | 1.16 | 1.16  | 0.21  | 4.76E-02 | 5.31E+00  | 5.31E+00 |

|                 |          |      |       |       |          |           |          |
|-----------------|----------|------|-------|-------|----------|-----------|----------|
| ENSG00000162972 | C2orf47  | 0.85 | -1.17 | -0.23 | 4.88E-02 | -5.30E+00 | 5.30E+00 |
| ENSG00000168438 | CDC40    | 0.86 | -1.16 | -0.21 | 4.82E-02 | -5.28E+00 | 5.28E+00 |
| ENSG00000113732 | ATP6V0E1 | 1.18 | 1.18  | 0.24  | 4.97E-02 | 5.28E+00  | 5.28E+00 |
| ENSG00000181104 | F2R      | 1.17 | 1.17  | 0.22  | 4.89E-02 | 5.28E+00  | 5.28E+00 |
| ENSG00000240972 | MIF      | 0.86 | -1.17 | -0.23 | 4.91E-02 | -5.28E+00 | 5.28E+00 |
| ENSG00000197562 | RAB40C   | 0.85 | -1.18 | -0.23 | 4.97E-02 | -5.27E+00 | 5.27E+00 |
| ENSG00000093144 | ECHDC1   | 1.17 | 1.17  | 0.23  | 4.95E-02 | 5.27E+00  | 5.27E+00 |
| ENSG00000108669 | CYTH1    | 1.17 | 1.17  | 0.23  | 4.95E-02 | 5.27E+00  | 5.27E+00 |
| ENSG00000157869 | RAB28    | 0.86 | -1.16 | -0.21 | 4.92E-02 | -5.23E+00 | 5.23E+00 |
| ENSG00000185753 | CXorf38  | 0.86 | -1.16 | -0.22 | 4.96E-02 | -5.22E+00 | 5.22E+00 |
| ENSG00000197905 | TEAD4    | 1.16 | 1.16  | 0.22  | 4.96E-02 | 5.21E+00  | 5.21E+00 |
| ENSG00000120306 | CYSTM1   | 1.16 | 1.16  | 0.21  | 4.98E-02 | 5.20E+00  | 5.20E+00 |
| ENSG00000117691 | NENF     | 1.16 | 1.16  | 0.22  | 4.99E-02 | 5.20E+00  | 5.20E+00 |
| ENSG00000181191 | PJA1     | 1.16 | 1.16  | 0.21  | 4.95E-02 | 5.19E+00  | 5.19E+00 |
| ENSG00000141219 | C17orf80 | 1.16 | 1.16  | 0.21  | 4.98E-02 | 5.19E+00  | 5.19E+00 |
| ENSG00000105851 | PIK3CG   | 1.16 | 1.16  | 0.21  | 4.99E-02 | 5.18E+00  | 5.18E+00 |
